# Supplementary material
Source: publisher site journal article supplement (https://www.dovepress.com/article/351971)
Supplement: Supplementary file 1 [file get_supplementary_file.php]

# Supplementary figure 1

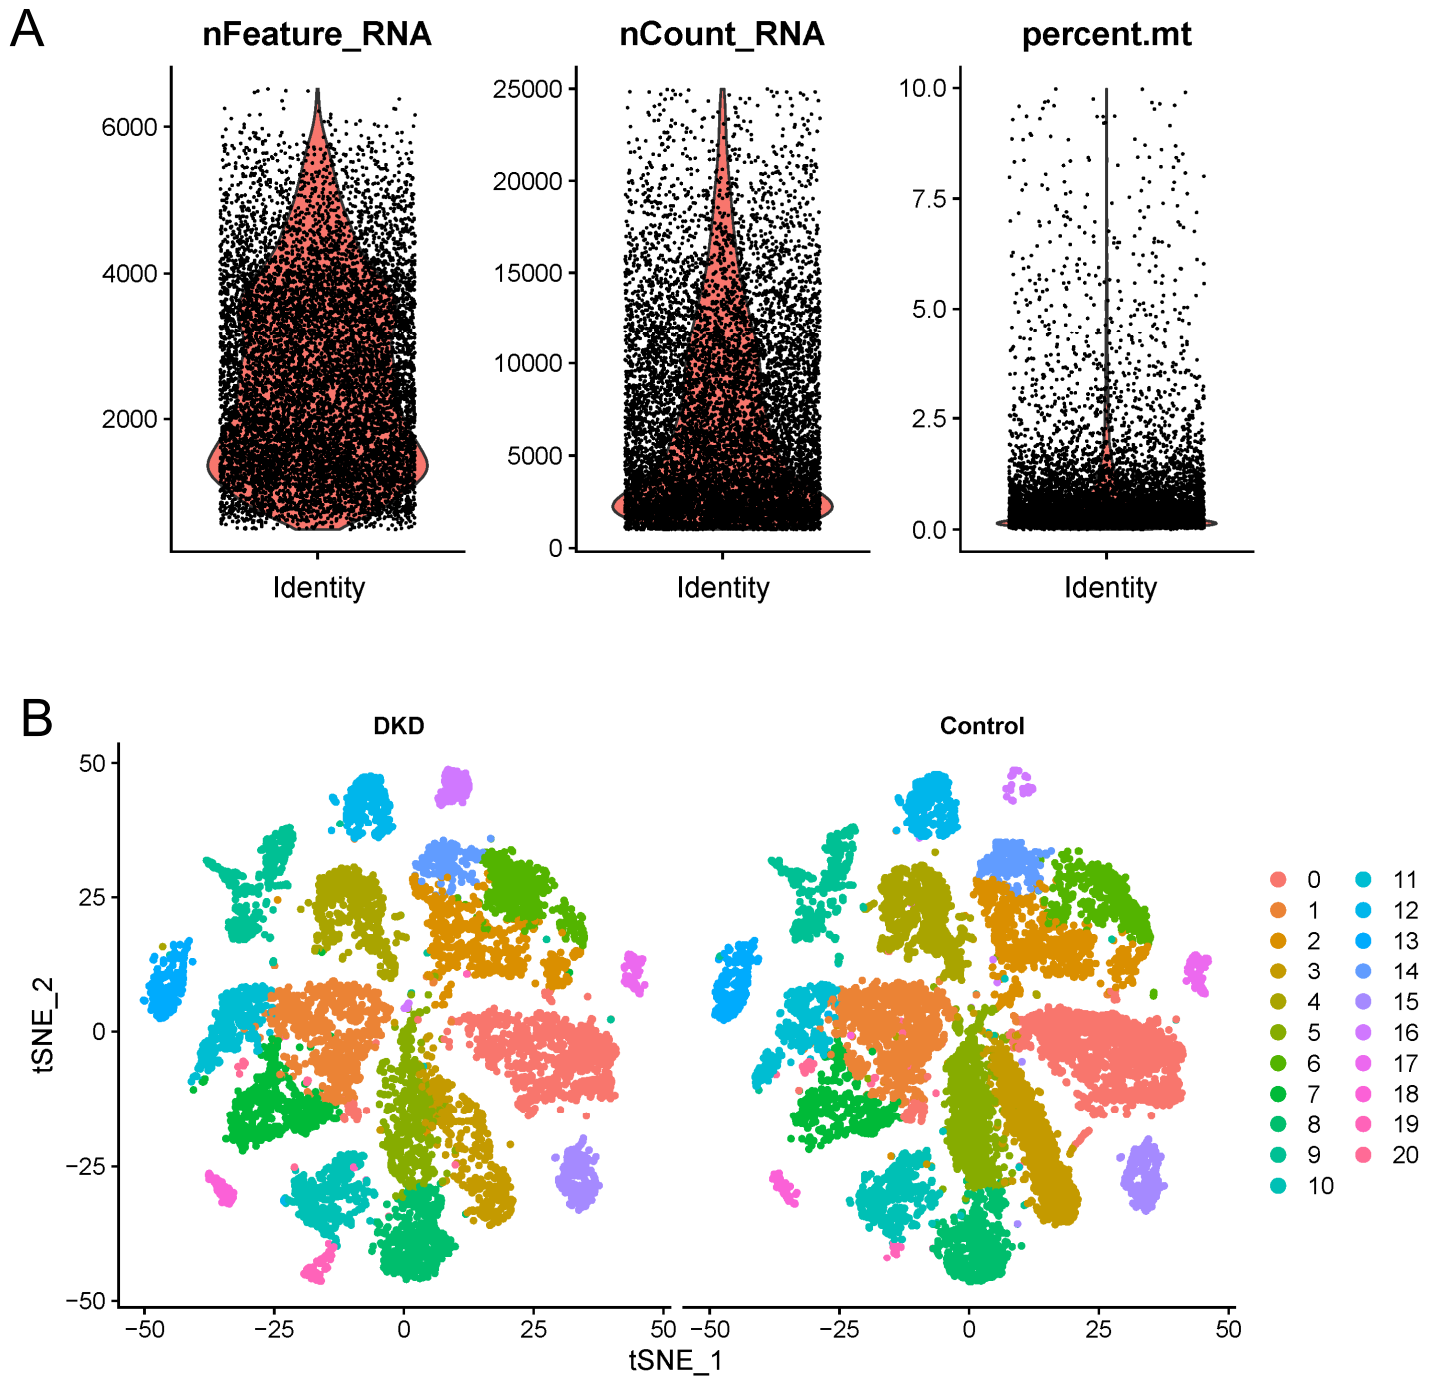

**Supplementary figure 1.** (A) Post quality control filtering of each sequenced cell, which was plotted in violin plots to display their number of RNA features (nFeature\_RNA), absolute UMI counts (nCount\_RNA) and the proportion of mitochondria (percent.mt). (B) T-SNE plot of the distribution of DKD and normal group.

**Table S1. High variable genes in 21 clusters**

| P-value   | avg_log2FC  | pct.1 | pct.2 | adjust p-value | cluster | gene       |
|-----------|-------------|-------|-------|----------------|---------|------------|
| 0         | 5.283083995 | 0.993 | 0.121 | 0              | 0       | SLC12A3    |
| 0         | 3.059335755 | 0.748 | 0.097 | 0              | 0       | TRPM6      |
| 0         | 3.04896519  | 0.836 | 0.103 | 0              | 0       | AC078980.1 |
| 0         | 2.957519033 | 0.909 | 0.433 | 0              | 0       | CNNM2      |
| 0         | 2.928998992 | 0.959 | 0.59  | 0              | 0       | TRPM7      |
| 0         | 2.841404204 | 0.941 | 0.327 | 0              | 0       | EGF        |
| 0         | 2.367579029 | 0.87  | 0.257 | 0              | 0       | FMN1       |
| 0         | 2.300646915 | 0.955 | 0.631 | 0              | 0       | RNPC3      |
| 0         | 2.270890132 | 0.83  | 0.228 | 0              | 0       | KLHL3      |
| 0         | 2.229279997 | 0.763 | 0.214 | 0              | 0       | ADAMTS17   |
| 0         | 2.066246409 | 0.89  | 0.206 | 0              | 0       | TMEM52B    |
| 0         | 2.051390285 | 0.811 | 0.28  | 0              | 0       | CADM1      |
| 0         | 2.025310308 | 0.728 | 0.211 | 0              | 0       | ZNF385D    |
| 0         | 2.012965947 | 0.908 | 0.485 | 0              | 0       | ABCA5      |
| 0         | 1.864577831 | 0.782 | 0.206 | 0              | 0       | CACNB4     |
| 0         | 1.852535328 | 0.872 | 0.504 | 0              | 0       | TSC22D2    |
| 0         | 1.850938657 | 0.642 | 0.161 | 0              | 0       | LINC00484  |
| 0         | 1.828308005 | 0.907 | 0.614 | 0              | 0       | CPEB4      |
| 0         | 1.82102423  | 0.974 | 0.641 | 0              | 0       | WNK1       |
| 0         | 1.815159169 | 0.401 | 0.115 | 0              | 0       | CALCR      |
| 0         | 1.800121265 | 0.79  | 0.357 | 0              | 0       | CACNA1D    |
| 0         | 1.783335664 | 0.559 | 0.169 | 0              | 0       | SPP1       |
| 0         | 1.78106376  | 0.876 | 0.264 | 0              | 0       | LINC01762  |
| 0         | 1.728390536 | 0.825 | 0.392 | 0              | 0       | ICA1       |
| 0         | 1.70088386  | 0.949 | 0.691 | 0              | 0       | KANK1      |
| 0         | 1.693342661 | 0.749 | 0.257 | 0              | 0       | ABCA10     |
| 0         | 1.679734991 | 0.941 | 0.666 | 0              | 0       | APBB2      |
| 0         | 1.65316653  | 0.804 | 0.334 | 0              | 0       | FGF13      |
| 0         | 1.600427286 | 0.713 | 0.187 | 0              | 0       | AC068547.1 |
| 0         | 1.53675779  | 0.433 | 0.059 | 0              | 0       | DNER       |
| 0         | 1.532475385 | 0.77  | 0.349 | 0              | 0       | TBC1D9     |
| 0         | 1.521645797 | 0.583 | 0.197 | 0              | 0       | KL         |
| 0         | 1.499696091 | 0.676 | 0.189 | 0              | 0       | ITPKB      |
| 1.54E-272 | 1.481088151 | 0.553 | 0.273 | 4.93E-268      | 0       | IL1RAPL2   |
| 0         | 1.456867887 | 0.74  | 0.393 | 0              | 0       | CNOT6L     |
| 0         | 1.444202399 | 0.969 | 0.771 | 0              | 0       | MAML2      |
| 0         | 1.440498636 | 0.64  | 0.205 | 0              | 0       | BTBD11     |
| 0         | 1.430971507 | 0.5   | 0.16  | 0              | 0       | UNC5C      |
| 0         | 1.430916075 | 0.554 | 0.158 | 0              | 0       | AMY2B      |
| 0         | 1.411276578 | 0.907 | 0.313 | 0              | 0       | CACNA2D3   |
| 1.64E-199 | 1.409873169 | 0.328 | 0.125 | 5.25E-195      | 0       | PTCHD1-AS  |
| 0         | 1.40935109  | 0.86  | 0.556 | 0              | 0       | MITF       |
| 0         | 1.403650472 | 0.761 | 0.341 | 0              | 0       | ZDHHC14    |
| 0         | 1.394135172 | 0.711 | 0.188 | 0              | 0       | AC068631.1 |
| 0         | 1.390348787 | 0.599 | 0.073 | 0              | 0       | CPXM2      |
| 0         | 1.38710975  | 0.474 | 0.059 | 0              | 0       | SLC19A3    |
| 0         | 1.361958847 | 0.829 | 0.522 | 0              | 0       | TSC22D1    |
| 0         | 1.355743496 | 0.368 | 0.037 | 0              | 0       | PID1       |

|           |             |       |       |           |              |
|-----------|-------------|-------|-------|-----------|--------------|
| 0         | 1.354405094 | 0.835 | 0.465 | 0         | 0 IVNS1ABP   |
| 0         | 1.344728092 | 0.462 | 0.049 | 0         | 0 LINC01055  |
| 0         | 1.330258236 | 0.792 | 0.453 | 0         | 0 NOS1AP     |
| 0         | 1.324443556 | 0.735 | 0.215 | 0         | 0 CA10       |
| 0         | 1.317696965 | 0.966 | 0.714 | 0         | 0 ARHGAP6    |
| 0         | 1.304080193 | 0.503 | 0.049 | 0         | 0 DEPDC1B    |
| 0         | 1.301386    | 0.663 | 0.135 | 0         | 0 KNG1       |
| 0         | 1.289946884 | 0.848 | 0.582 | 0         | 0 USP24      |
| 0         | 1.270384644 | 0.612 | 0.25  | 0         | 0 SLC9C1     |
| 0         | 1.264412086 | 0.863 | 0.373 | 0         | 0 CLCNKB     |
| 0         | 1.260036953 | 0.651 | 0.181 | 0         | 0 HS6ST2     |
| 0         | 1.259543016 | 0.888 | 0.576 | 0         | 0 MRPS6      |
| 0         | 1.251023784 | 0.883 | 0.43  | 0         | 0 GRB14      |
| 0         | 1.245665748 | 0.991 | 0.866 | 0         | 0 ESRRG      |
| 7.25E-230 | 1.241152282 | 0.704 | 0.431 | 2.33E-225 | 0 GPC5       |
| 0         | 1.239074405 | 0.788 | 0.362 | 0         | 0 ACSL4      |
| 0         | 1.21258755  | 0.492 | 0.08  | 0         | 0 SLC24A3    |
| 0         | 1.212293011 | 0.523 | 0.154 | 0         | 0 MAP2K6     |
| 0         | 1.210370606 | 0.776 | 0.494 | 0         | 0 FRMD3      |
| 0         | 1.209883937 | 0.866 | 0.54  | 0         | 0 VAV3       |
| 0         | 1.206556895 | 0.54  | 0.137 | 0         | 0 HMCN1      |
| 0         | 1.198004909 | 0.466 | 0.032 | 0         | 0 TRIM50     |
| 0         | 1.191967703 | 0.733 | 0.392 | 0         | 0 GCNT2      |
| 0         | 1.185925468 | 0.868 | 0.575 | 0         | 0 ITPR1      |
| 0         | 1.183763211 | 0.847 | 0.602 | 0         | 0 LRCH1      |
| 0         | 1.183010043 | 0.819 | 0.346 | 0         | 0 CLCNKA     |
| 0         | 1.178832765 | 0.561 | 0.181 | 0         | 0 TNFRSF19   |
| 0         | 1.165801259 | 0.512 | 0.029 | 0         | 0 SALL3      |
| 0         | 1.15850907  | 0.665 | 0.314 | 0         | 0 AP001831.1 |
| 0         | 1.148276816 | 0.261 | 0.048 | 0         | 0 LINC01828  |
| 0         | 1.140209943 | 0.655 | 0.316 | 0         | 0 BACE2      |
| 0         | 1.134906794 | 0.888 | 0.684 | 0         | 0 CLASP1     |
| 0         | 1.128205071 | 0.799 | 0.466 | 0         | 0 WDFY2      |
| 0         | 1.127811234 | 0.458 | 0.105 | 0         | 0 GAD1       |
| 0         | 1.122665041 | 0.971 | 0.863 | 0         | 0 AL136164.2 |
| 0         | 1.11982198  | 0.736 | 0.233 | 0         | 0 CASR       |
| 0         | 1.116118498 | 0.617 | 0.155 | 0         | 0 WNK4       |
| 0         | 1.114791065 | 0.438 | 0.052 | 0         | 0 SHC3       |
| 0         | 1.100707858 | 0.883 | 0.508 | 0         | 0 EFNA5      |
| 0         | 1.100695295 | 0.717 | 0.307 | 0         | 0 LINC00970  |
| 0         | 1.10060239  | 0.904 | 0.646 | 0         | 0 AC005208.1 |
| 0         | 1.094857933 | 0.983 | 0.735 | 0         | 0 ERBB4      |
| 0         | 1.085523174 | 0.789 | 0.41  | 0         | 0 SCN2A      |
| 0         | 1.08500055  | 0.777 | 0.487 | 0         | 0 OPHN1      |
| 0         | 1.078529403 | 0.851 | 0.527 | 0         | 0 SAT1       |
| 0         | 1.076260324 | 0.821 | 0.536 | 0         | 0 CBLB       |
| 0         | 1.056804641 | 0.844 | 0.489 | 0         | 0 OSBPL3     |
| 0         | 1.04472017  | 0.857 | 0.518 | 0         | 0 COL4A3     |
| 0         | 1.040328993 | 0.981 | 0.733 | 0         | 0 AC019197.1 |
| 0         | 1.030036359 | 0.832 | 0.4   | 0         | 0 TEX41      |
| 0         | 1.028097958 | 0.497 | 0.157 | 0         | 0 VDR        |

|           |             |       |       |           |              |
|-----------|-------------|-------|-------|-----------|--------------|
| 0         | 1.02781986  | 0.725 | 0.207 | 0         | 0 ESRRB      |
| 0         | 1.019989732 | 0.571 | 0.223 | 0         | 0 ME3        |
| 0         | 1.009843653 | 0.802 | 0.442 | 0         | 0 AC138305.1 |
| 1.98E-200 | 1.005567257 | 0.594 | 0.328 | 6.35E-196 | 0 NELL1      |
| 0         | 1.003909491 | 0.374 | 0.094 | 0         | 0 AC117386.2 |
| 0         | 0.982302148 | 0.788 | 0.502 | 0         | 0 AK3        |
| 0         | 0.981567965 | 0.605 | 0.23  | 0         | 0 SEMA6D     |
| 0         | 0.981240799 | 0.525 | 0.192 | 0         | 0 DCUN1D5    |
| 0         | 0.977765816 | 0.906 | 0.66  | 0         | 0 FHOD3      |
| 0         | 0.963193261 | 0.47  | 0.151 | 0         | 0 PHF21B     |
| 0         | 0.948414792 | 0.788 | 0.443 | 0         | 0 TOX3       |
| 3.94E-241 | 0.944034463 | 0.784 | 0.569 | 1.27E-236 | 0 DYNC2H1    |
| 0         | 0.937709038 | 0.602 | 0.251 | 0         | 0 SNX10      |
| 1.52E-180 | 0.932989807 | 0.366 | 0.155 | 4.88E-176 | 0 LINC01505  |
| 9.36E-276 | 0.922217498 | 0.722 | 0.41  | 3.01E-271 | 0 RNF150     |
| 0         | 0.920618815 | 0.93  | 0.764 | 0         | 0 PKP4       |
| 0         | 0.914865192 | 0.62  | 0.147 | 0         | 0 TMEM101    |
| 0         | 0.911203593 | 0.4   | 0.082 | 0         | 0 SFRP1      |
| 0         | 0.911006754 | 0.72  | 0.402 | 0         | 0 KCNJ16     |
| 0         | 0.910953684 | 0.544 | 0.213 | 0         | 0 LINC01182  |
| 1.06E-273 | 0.899012845 | 0.602 | 0.304 | 3.41E-269 | 0 ATP8A1     |
| 3.53E-274 | 0.897289301 | 0.583 | 0.273 | 1.13E-269 | 0 CACHD1     |
| 0         | 0.896697393 | 0.373 | 0.097 | 0         | 0 USP43      |
| 4.18E-244 | 0.885944249 | 0.487 | 0.209 | 1.34E-239 | 0 CABLES1    |
| 0         | 0.882388077 | 0.951 | 0.822 | 0         | 0 LRBA       |
| 0         | 0.87624794  | 0.827 | 0.478 | 0         | 0 FREM1      |
| 1.37E-302 | 0.869999319 | 0.602 | 0.272 | 4.40E-298 | 0 GPRIN3     |
| 3.09E-182 | 0.869412049 | 0.632 | 0.36  | 9.92E-178 | 0 MYO3B      |
| 0         | 0.868562218 | 0.641 | 0.289 | 0         | 0 AC040174.1 |
| 0         | 0.868438676 | 0.652 | 0.282 | 0         | 0 TMPRSS2    |
| 1.27E-297 | 0.866843444 | 0.872 | 0.633 | 4.09E-293 | 0 LGR4       |
| 0         | 0.860805064 | 0.301 | 0.049 | 0         | 0 TMEM108    |
| 1.06E-52  | 0.860681278 | 0.284 | 0.182 | 3.41E-48  | 0 MIR646HG   |
| 2.26E-274 | 0.856786166 | 0.732 | 0.421 | 7.27E-270 | 0 KCTD1      |
| 7.45E-220 | 0.844911971 | 0.353 | 0.126 | 2.39E-215 | 0 CCDC60     |
| 6.35E-168 | 0.844473687 | 0.737 | 0.536 | 2.04E-163 | 0 ADGRL2     |
| 5.32E-292 | 0.844164688 | 0.626 | 0.322 | 1.71E-287 | 0 SPPL2A     |
| 2.41E-187 | 0.843769224 | 0.668 | 0.397 | 7.74E-183 | 0 AL390334.1 |
| 0         | 0.84314705  | 0.592 | 0.191 | 0         | 0 EMX1       |
| 0         | 0.840171491 | 0.993 | 0.763 | 0         | 0 CCSER1     |
| 0         | 0.838185909 | 0.702 | 0.273 | 0         | 0 GRAMD1B    |
| 0         | 0.837402602 | 0.446 | 0.124 | 0         | 0 GCGR       |
| 0         | 0.830362299 | 0.429 | 0.129 | 0         | 0 STAC       |
| 4.26E-235 | 0.83032694  | 0.664 | 0.37  | 1.37E-230 | 0 PDZRN3     |
| 0         | 0.830277556 | 0.439 | 0.13  | 0         | 0 C3orf52    |
| 3.81E-299 | 0.829682714 | 0.519 | 0.213 | 1.22E-294 | 0 MARK1      |
| 2.31E-132 | 0.814932899 | 0.263 | 0.105 | 7.41E-128 | 0 ADGRL3     |
| 5.85E-308 | 0.813310179 | 0.903 | 0.76  | 1.88E-303 | 0 FNDC3B     |
| 0         | 0.809805341 | 0.805 | 0.361 | 0         | 0 PIK3C2G    |
| 3.05E-256 | 0.80920485  | 0.406 | 0.148 | 9.80E-252 | 0 SLC12A2    |
| 3.01E-290 | 0.806386824 | 0.698 | 0.351 | 9.66E-286 | 0 ADAMTS16   |

|           |             |       |       |           |              |
|-----------|-------------|-------|-------|-----------|--------------|
| 5.47E-307 | 0.806057041 | 0.963 | 0.763 | 1.76E-302 | 0 PLCL1      |
| 0         | 0.803222749 | 0.807 | 0.409 | 0         | 0 DACH1      |
| 7.01E-210 | 0.801332848 | 0.654 | 0.398 | 2.25E-205 | 0 CPEB2      |
| 5.66E-269 | 0.79928419  | 0.484 | 0.206 | 1.82E-264 | 0 CCNB1IP1   |
| 0         | 0.794998822 | 0.276 | 0.062 | 0         | 0 EYA1       |
| 9.51E-223 | 0.793446072 | 0.683 | 0.381 | 3.05E-218 | 0 SLC16A7    |
| 0         | 0.793214982 | 0.423 | 0.114 | 0         | 0 LHX1-DT    |
| 6.01E-260 | 0.791168195 | 0.619 | 0.308 | 1.93E-255 | 0 PRSS23     |
| 1.62E-238 | 0.784950781 | 0.376 | 0.131 | 5.20E-234 | 0 SPOCK1     |
| 2.09E-125 | 0.784602566 | 0.313 | 0.142 | 6.70E-121 | 0 UNC13C     |
| 9.07E-246 | 0.780740685 | 0.7   | 0.38  | 2.91E-241 | 0 COL4A5     |
| 1.22E-294 | 0.778667013 | 0.694 | 0.342 | 3.91E-290 | 0 SIM1       |
| 6.92E-200 | 0.774742985 | 0.81  | 0.574 | 2.22E-195 | 0 IGFBP7     |
| 1.63E-259 | 0.772325887 | 0.543 | 0.241 | 5.23E-255 | 0 EXPH5      |
| 5.11E-193 | 0.763514231 | 0.373 | 0.141 | 1.64E-188 | 0 AC092078.2 |
| 3.14E-110 | 0.763214173 | 0.504 | 0.316 | 1.01E-105 | 0 FREM2      |
| 1.17E-217 | 0.762398616 | 0.589 | 0.322 | 3.76E-213 | 0 ITGB5      |
| 1.05E-267 | 0.75943047  | 0.467 | 0.183 | 3.38E-263 | 0 SH3PXD2A   |
| 1.53E-204 | 0.758370766 | 0.67  | 0.419 | 4.92E-200 | 0 NNT        |
| 9.91E-211 | 0.757864759 | 0.759 | 0.514 | 3.18E-206 | 0 CTDSPL     |
| 8.08E-261 | 0.744785154 | 0.716 | 0.426 | 2.60E-256 | 0 TOM1L2     |
| 0         | 0.744254051 | 0.989 | 0.751 | 0         | 0 MECOM      |
| 0         | 0.744162147 | 0.64  | 0.239 | 0         | 0 SGIP1      |
| 0         | 0.744089261 | 0.311 | 0.013 | 0         | 0 LINC01896  |
| 0         | 0.744065817 | 0.375 | 0.078 | 0         | 0 ABCA6      |
| 0         | 0.7399232   | 0.426 | 0.131 | 0         | 0 DENND2A    |
| 4.98E-266 | 0.737348374 | 0.736 | 0.437 | 1.60E-261 | 0 HOXD3      |
| 0         | 0.733219522 | 0.518 | 0.189 | 0         | 0 KCNJ1      |
| 2.75E-299 | 0.732866904 | 0.802 | 0.474 | 8.83E-295 | 0 TACC1      |
| 1.87E-208 | 0.731450629 | 0.625 | 0.357 | 6.01E-204 | 0 BCL2L1     |
| 0         | 0.723236597 | 0.393 | 0.11  | 0         | 0 LHX1       |
| 8.16E-241 | 0.72156201  | 0.656 | 0.344 | 2.62E-236 | 0 PLPPR1     |
| 0         | 0.719895417 | 0.927 | 0.685 | 0         | 0 ATP1B1     |
| 1.87E-229 | 0.718280221 | 0.476 | 0.205 | 6.01E-225 | 0 SLC20A1    |
| 7.95E-278 | 0.713568249 | 0.486 | 0.191 | 2.55E-273 | 0 SGSM1      |
| 3.37E-109 | 0.712871293 | 0.629 | 0.432 | 1.08E-104 | 0 SAMD5      |
| 1.54E-225 | 0.706789618 | 0.4   | 0.157 | 4.95E-221 | 0 RELL1      |
| 5.88E-14  | 0.706085875 | 0.388 | 0.318 | 1.89E-09  | 0 SLC8A1-AS1 |
| 6.58E-110 | 0.701131741 | 0.316 | 0.148 | 2.11E-105 | 0 FAM155A    |
| 2.42E-234 | 0.697532163 | 0.606 | 0.307 | 7.76E-230 | 0 MROH7      |
| 3.34E-143 | 0.695253265 | 0.578 | 0.355 | 1.07E-138 | 0 IPCEF1     |
| 2.40E-189 | 0.693650919 | 0.722 | 0.467 | 7.69E-185 | 0 XKR6       |
| 1.33E-230 | 0.686049365 | 0.855 | 0.598 | 4.27E-226 | 0 ATP1A1     |
| 6.56E-258 | 0.683372924 | 0.536 | 0.22  | 2.11E-253 | 0 RANBP3L    |
| 4.09E-239 | 0.683214656 | 0.588 | 0.282 | 1.31E-234 | 0 TMEM213    |
| 0         | 0.681273161 | 0.948 | 0.811 | 0         | 0 MSI2       |
| 4.77E-235 | 0.68060186  | 0.755 | 0.457 | 1.53E-230 | 0 COL4A4     |
| 0         | 0.677390868 | 0.402 | 0.12  | 0         | 0 NOS1       |
| 4.70E-215 | 0.676559691 | 0.564 | 0.279 | 1.51E-210 | 0 SLC22A15   |
| 8.76E-128 | 0.676249707 | 0.658 | 0.471 | 2.81E-123 | 0 HIF1A      |
| 1.16E-190 | 0.672895676 | 0.754 | 0.485 | 3.72E-186 | 0 RHOBTB3    |

|           |             |       |       |           |                |
|-----------|-------------|-------|-------|-----------|----------------|
| 8.43E-14  | 0.672578822 | 0.564 | 0.495 | 2.71E-09  | 0 SLC8A1       |
| 6.93E-269 | 0.670557864 | 0.428 | 0.157 | 2.23E-264 | 0 TMEM38B      |
| 6.32E-264 | 0.669138436 | 0.514 | 0.22  | 2.03E-259 | 0 SLC35B4      |
| 0         | 0.66630533  | 0.324 | 0.062 | 0         | 0 ABCA9-AS1    |
| 9.52E-213 | 0.664166433 | 0.678 | 0.399 | 3.06E-208 | 0 ACOT11       |
| 3.09E-303 | 0.663632954 | 0.55  | 0.213 | 9.91E-299 | 0 EYA2         |
| 5.12E-298 | 0.660985721 | 0.575 | 0.245 | 1.64E-293 | 0 PIP5K1B      |
| 5.04E-214 | 0.660579898 | 0.526 | 0.268 | 1.62E-209 | 0 FZD6         |
| 1.21E-211 | 0.659310471 | 0.494 | 0.242 | 3.88E-207 | 0 LINC00472    |
| 1.69E-186 | 0.658570166 | 0.797 | 0.571 | 5.43E-182 | 0 PTPN4        |
| 1.26E-146 | 0.656855675 | 0.735 | 0.523 | 4.03E-142 | 0 PRICKLE2     |
| 7.18E-300 | 0.656609465 | 0.413 | 0.132 | 2.31E-295 | 0 LAMA1        |
| 1.50E-206 | 0.655120923 | 0.747 | 0.454 | 4.80E-202 | 0 CCDC148      |
| 1.37E-219 | 0.654630664 | 0.452 | 0.187 | 4.41E-215 | 0 B4GALNT3     |
| 6.75E-175 | 0.652922368 | 0.47  | 0.231 | 2.17E-170 | 0 CTNNA1       |
| 9.89E-207 | 0.652849046 | 0.604 | 0.321 | 3.18E-202 | 0 ELOVL7       |
| 1.12E-93  | 0.652778164 | 0.8   | 0.665 | 3.61E-89  | 0 NFE2L2       |
| 2.80E-194 | 0.651564738 | 0.64  | 0.379 | 8.98E-190 | 0 LINC01138    |
| 3.94E-184 | 0.646325961 | 0.633 | 0.369 | 1.26E-179 | 0 ABCC5        |
| 2.60E-207 | 0.644067195 | 0.754 | 0.475 | 8.35E-203 | 0 FXRD2        |
| 2.83E-175 | 0.641339147 | 0.642 | 0.381 | 9.07E-171 | 0 ITGA2        |
| 5.16E-207 | 0.638374557 | 0.648 | 0.359 | 1.66E-202 | 0 DNMT3        |
| 2.35E-219 | 0.636797051 | 0.444 | 0.185 | 7.54E-215 | 0 TPST2        |
| 0         | 0.63615587  | 0.354 | 0.092 | 0         | 0 TFAP2A       |
| 9.53E-253 | 0.635946119 | 0.411 | 0.15  | 3.06E-248 | 0 ALPK3        |
| 0         | 0.635740851 | 0.254 | 0.023 | 0         | 0 TCF24        |
| 0         | 0.633571886 | 0.357 | 0.089 | 0         | 0 KCNN3        |
| 8.74E-135 | 0.62846463  | 0.681 | 0.49  | 2.81E-130 | 0 TMEM245      |
| 2.67E-208 | 0.626780617 | 0.598 | 0.305 | 8.56E-204 | 0 BLNK         |
| 8.11E-163 | 0.623469815 | 0.726 | 0.488 | 2.60E-158 | 0 C4orf19      |
| 3.71E-169 | 0.622650247 | 0.865 | 0.643 | 1.19E-164 | 0 PTGER3       |
| 2.14E-174 | 0.618323051 | 0.49  | 0.235 | 6.86E-170 | 0 KITLG        |
| 6.47E-247 | 0.617781375 | 0.717 | 0.377 | 2.08E-242 | 0 ATP6V0A4     |
| 5.77E-280 | 0.617477631 | 0.421 | 0.143 | 1.85E-275 | 0 INPP5J       |
| 9.72E-173 | 0.613895593 | 0.677 | 0.437 | 3.12E-168 | 0 ATRN         |
| 4.38E-168 | 0.613167152 | 0.841 | 0.662 | 1.41E-163 | 0 C20orf194    |
| 2.30E-184 | 0.611105181 | 0.542 | 0.276 | 7.38E-180 | 0 MST1L        |
| 8.05E-133 | 0.607219267 | 0.64  | 0.448 | 2.58E-128 | 0 CLINT1       |
| 2.56E-242 | 0.603049307 | 0.372 | 0.123 | 8.23E-238 | 0 AC024022.1   |
| 3.83E-144 | 0.602844746 | 0.727 | 0.518 | 1.23E-139 | 0 GBE1         |
| 0         | 0.598768974 | 0.892 | 0.565 | 0         | 0 CA12         |
| 1.26E-182 | 0.598288408 | 0.806 | 0.627 | 4.05E-178 | 0 ATP9B        |
| 3.34E-136 | 0.597774676 | 0.547 | 0.333 | 1.07E-131 | 0 LUZP1        |
| 4.31E-299 | 0.593321521 | 0.972 | 0.804 | 1.38E-294 | 0 COBLL1       |
| 5.79E-196 | 0.593255479 | 0.527 | 0.253 | 1.86E-191 | 0 SCN3A        |
| 5.88E-81  | 0.592794883 | 0.482 | 0.311 | 1.89E-76  | 0 AL033504.1   |
| 3.00E-177 | 0.591282528 | 0.715 | 0.486 | 9.63E-173 | 0 OGT          |
| 2.36E-82  | 0.589977488 | 0.584 | 0.42  | 7.58E-78  | 0 RASSF8       |
| 2.19E-183 | 0.589744664 | 0.348 | 0.137 | 7.02E-179 | 0 TAF4B        |
| 2.16E-148 | 0.588422203 | 0.708 | 0.481 | 6.95E-144 | 0 TMEM161B-AS1 |
| 0         | 0.587445729 | 0.289 | 0.009 | 0         | 0 AL355612.1   |

|           |             |       |       |           |              |
|-----------|-------------|-------|-------|-----------|--------------|
| 4.47E-275 | 0.587194178 | 0.296 | 0.077 | 1.43E-270 | 0 MED12L     |
| 3.30E-139 | 0.585381422 | 0.362 | 0.165 | 1.06E-134 | 0 NEXMIF     |
| 2.08E-167 | 0.582915875 | 0.883 | 0.746 | 6.68E-163 | 0 CDK14      |
| 1.16E-105 | 0.577823939 | 0.316 | 0.151 | 3.74E-101 | 0 COL4A6     |
| 8.07E-233 | 0.577331685 | 0.347 | 0.118 | 2.59E-228 | 0 AL161725.1 |
| 4.29E-171 | 0.576514123 | 0.406 | 0.179 | 1.38E-166 | 0 AP000317.2 |
| 4.57E-204 | 0.574616812 | 0.73  | 0.422 | 1.47E-199 | 0 STK39      |
| 3.47E-182 | 0.574548668 | 0.611 | 0.337 | 1.11E-177 | 0 ARNT2      |
| 0         | 0.573948845 | 0.298 | 0.058 | 0         | 0 AC016526.1 |
| 3.75E-290 | 0.57326203  | 0.298 | 0.076 | 1.20E-285 | 0 CDCP1      |
| 3.01E-154 | 0.571001732 | 0.84  | 0.662 | 9.66E-150 | 0 ABLIM1     |
| 7.23E-96  | 0.56946248  | 0.596 | 0.413 | 2.32E-91  | 0 AL078459.1 |
| 0         | 0.569193744 | 0.26  | 0.034 | 0         | 0 PROX1      |
| 1.68E-165 | 0.567969256 | 0.665 | 0.391 | 5.39E-161 | 0 STK32B     |
| 1.66E-200 | 0.561577398 | 0.465 | 0.199 | 5.34E-196 | 0 SUSL4      |
| 5.75E-175 | 0.559757101 | 0.913 | 0.743 | 1.85E-170 | 0 PPP2R3A    |
| 2.03E-162 | 0.559527936 | 0.527 | 0.287 | 6.52E-158 | 0 ERMP1      |
| 0         | 0.5590332   | 0.301 | 0.064 | 0         | 0 NPY1R      |
| 3.87E-182 | 0.557599567 | 0.424 | 0.191 | 1.24E-177 | 0 UXS1       |
| 2.93E-139 | 0.555252243 | 0.303 | 0.126 | 9.41E-135 | 0 KCNH1      |
| 9.52E-184 | 0.554478368 | 0.862 | 0.635 | 3.06E-179 | 0 LIMCH1     |
| 2.70E-168 | 0.553668106 | 0.88  | 0.728 | 8.66E-164 | 0 ATXN1      |
| 1.06E-32  | 0.553531166 | 0.728 | 0.646 | 3.41E-28  | 0 SH3RF1     |
| 5.70E-137 | 0.552353582 | 0.722 | 0.514 | 1.83E-132 | 0 SVIL       |
| 2.52E-176 | 0.551847098 | 0.53  | 0.276 | 8.09E-172 | 0 AC008878.3 |
| 8.60E-112 | 0.547222006 | 0.648 | 0.455 | 2.76E-107 | 0 STX18      |
| 1.09E-205 | 0.546308569 | 0.987 | 0.862 | 3.50E-201 | 0 PKHD1      |
| 2.68E-214 | 0.54396459  | 0.448 | 0.177 | 8.62E-210 | 0 NRK        |
| 1.06E-110 | 0.543609564 | 0.407 | 0.216 | 3.39E-106 | 0 LINC01036  |
| 1.13E-176 | 0.541892909 | 0.507 | 0.243 | 3.62E-172 | 0 KSR2       |
| 0         | 0.541331768 | 0.288 | 0.064 | 0         | 0 MMP13      |
| 2.78E-108 | 0.537009545 | 0.362 | 0.184 | 8.94E-104 | 0 FSTL4      |
| 6.59E-150 | 0.536607746 | 0.723 | 0.473 | 2.12E-145 | 0 TRIM2      |
| 1.22E-175 | 0.532549281 | 0.877 | 0.631 | 3.91E-171 | 0 MAST4      |
| 1.68E-113 | 0.532198591 | 0.759 | 0.585 | 5.40E-109 | 0 TBL1X      |
| 1.98E-163 | 0.528430058 | 0.584 | 0.324 | 6.36E-159 | 0 RAP1GAP2   |
| 1.11E-137 | 0.526023146 | 0.733 | 0.506 | 3.56E-133 | 0 PLCXD2     |
| 1.39E-109 | 0.525139618 | 0.664 | 0.47  | 4.46E-105 | 0 FERMT2     |
| 0         | 0.524281192 | 0.297 | 0.067 | 0         | 0 HOXD8      |
| 9.13E-135 | 0.52231937  | 0.799 | 0.595 | 2.93E-130 | 0 ACACB      |
| 4.20E-127 | 0.52225599  | 0.801 | 0.675 | 1.35E-122 | 0 MEF2A      |
| 6.68E-147 | 0.522157253 | 0.527 | 0.297 | 2.15E-142 | 0 TSC1       |
| 8.32E-174 | 0.519983822 | 0.445 | 0.209 | 2.67E-169 | 0 IDH2       |
| 4.25E-146 | 0.518837607 | 0.513 | 0.278 | 1.37E-141 | 0 CYS1       |
| 9.37E-185 | 0.517783099 | 0.473 | 0.224 | 3.01E-180 | 0 MYO5C      |
| 1.31E-104 | 0.517619848 | 0.683 | 0.492 | 4.21E-100 | 0 MAN1A1     |
| 9.14E-88  | 0.515931468 | 0.486 | 0.308 | 2.93E-83  | 0 AC009690.2 |
| 5.02E-169 | 0.515865139 | 0.429 | 0.197 | 1.61E-164 | 0 TPD52L1    |
| 6.62E-180 | 0.515834827 | 0.414 | 0.183 | 2.13E-175 | 0 HPRT1      |
| 3.18E-101 | 0.513395789 | 0.552 | 0.373 | 1.02E-96  | 0 TPP2       |
| 2.17E-132 | 0.512428092 | 0.659 | 0.446 | 6.97E-128 | 0 VAPA       |

|           |             |       |       |           |              |
|-----------|-------------|-------|-------|-----------|--------------|
| 2.82E-142 | 0.510938721 | 0.837 | 0.656 | 9.06E-138 | 0 ARHGAP24   |
| 1.99E-158 | 0.510763894 | 0.324 | 0.129 | 6.40E-154 | 0 SCN7A      |
| 6.51E-110 | 0.509235082 | 0.654 | 0.476 | 2.09E-105 | 0 ETNK1      |
| 2.15E-199 | 0.508440051 | 0.548 | 0.263 | 6.89E-195 | 0 PLCB4      |
| 2.91E-47  | 0.505209347 | 0.59  | 0.473 | 9.34E-43  | 0 TACC2      |
| 9.47E-189 | 0.503238842 | 0.281 | 0.092 | 3.04E-184 | 0 NRG2       |
| 1.92E-159 | 0.502822413 | 0.398 | 0.175 | 6.17E-155 | 0 TMEM72     |
| 2.63E-173 | 0.50249407  | 0.72  | 0.427 | 8.46E-169 | 0 KLHL13     |
| 1.31E-133 | 0.496652643 | 0.67  | 0.454 | 4.22E-129 | 0 SLC25A12   |
| 1.98E-139 | 0.49571687  | 0.549 | 0.304 | 6.36E-135 | 0 CECR2      |
| 9.18E-91  | 0.492923898 | 0.554 | 0.356 | 2.95E-86  | 0 CDH16      |
| 2.21E-124 | 0.490333036 | 0.697 | 0.493 | 7.10E-120 | 0 UNC13B     |
| 3.59E-122 | 0.489822941 | 0.487 | 0.272 | 1.15E-117 | 0 OBSCN      |
| 1.47E-130 | 0.488220963 | 0.492 | 0.267 | 4.74E-126 | 0 SH3BP4     |
| 6.50E-146 | 0.487118296 | 0.804 | 0.575 | 2.09E-141 | 0 AC012409.2 |
| 2.18E-118 | 0.485321628 | 0.652 | 0.463 | 6.99E-114 | 0 MTX2       |
| 6.13E-94  | 0.483062693 | 0.729 | 0.509 | 1.97E-89  | 0 MYO10      |
| 5.80E-77  | 0.482784302 | 0.691 | 0.536 | 1.86E-72  | 0 AEBP2      |
| 2.00E-154 | 0.481741873 | 0.732 | 0.478 | 6.44E-150 | 0 ARHGEF3    |
| 1.95E-300 | 0.479138543 | 0.255 | 0.053 | 6.25E-296 | 0 LINC00645  |
| 5.91E-114 | 0.478806767 | 0.466 | 0.252 | 1.90E-109 | 0 KCTD8      |
| 2.14E-109 | 0.476500437 | 0.635 | 0.437 | 6.88E-105 | 0 ACTR3C     |
| 1.06E-91  | 0.47528776  | 0.693 | 0.51  | 3.39E-87  | 0 NR6A1      |
| 1.45E-116 | 0.475262213 | 0.406 | 0.213 | 4.65E-112 | 0 B3GLCT     |
| 8.60E-137 | 0.475105201 | 0.88  | 0.747 | 2.76E-132 | 0 KIAA1217   |
| 1.10E-130 | 0.474865503 | 0.493 | 0.267 | 3.54E-126 | 0 DEFB1      |
| 1.22E-153 | 0.473792175 | 0.655 | 0.381 | 3.91E-149 | 0 FAM171A1   |
| 5.87E-172 | 0.472987807 | 0.98  | 0.914 | 1.89E-167 | 0 FHIT       |
| 3.78E-161 | 0.471199556 | 0.933 | 0.825 | 1.21E-156 | 0 SNX29      |
| 9.06E-121 | 0.470427604 | 0.647 | 0.416 | 2.91E-116 | 0 MPC1       |
| 3.39E-112 | 0.470207694 | 0.616 | 0.409 | 1.09E-107 | 0 CMTM4      |
| 4.66E-121 | 0.46732993  | 0.659 | 0.453 | 1.50E-116 | 0 SNRK       |
| 7.87E-152 | 0.466807344 | 0.811 | 0.553 | 2.53E-147 | 0 TRABD2B    |
| 8.49E-78  | 0.466227913 | 0.61  | 0.425 | 2.73E-73  | 0 GPAT3      |
| 8.78E-140 | 0.465635522 | 0.388 | 0.182 | 2.82E-135 | 0 MST1P2     |
| 1.00E-200 | 0.465319388 | 0.281 | 0.088 | 3.22E-196 | 0 BAALC-AS1  |
| 2.08E-163 | 0.465316592 | 0.403 | 0.178 | 6.66E-159 | 0 ATP2B4     |
| 5.12E-102 | 0.464092397 | 0.666 | 0.453 | 1.64E-97  | 0 FAAH2      |
| 3.25E-125 | 0.462088874 | 0.549 | 0.335 | 1.04E-120 | 0 STAM2      |
| 2.36E-130 | 0.461039087 | 0.895 | 0.773 | 7.58E-126 | 0 AGAP1      |
| 4.76E-124 | 0.460499849 | 0.501 | 0.291 | 1.53E-119 | 0 DCUN1D1    |
| 1.76E-118 | 0.460494627 | 0.357 | 0.174 | 5.65E-114 | 0 CIT        |
| 9.82E-121 | 0.459126517 | 0.431 | 0.233 | 3.15E-116 | 0 AC140504.1 |
| 4.55E-101 | 0.458870542 | 0.358 | 0.187 | 1.46E-96  | 0 OPRM1      |
| 1.50E-149 | 0.457671747 | 0.93  | 0.772 | 4.81E-145 | 0 NR3C2      |
| 9.85E-96  | 0.455734943 | 0.747 | 0.574 | 3.16E-91  | 0 DAB1       |
| 1.78E-105 | 0.453513372 | 0.778 | 0.618 | 5.72E-101 | 0 USP25      |
| 1.92E-135 | 0.452652563 | 0.779 | 0.548 | 6.16E-131 | 0 CLCN5      |
| 2.82E-118 | 0.450148056 | 0.455 | 0.252 | 9.06E-114 | 0 MRPL1      |
| 1.54E-102 | 0.448407984 | 0.734 | 0.555 | 4.95E-98  | 0 ARHGAP5    |
| 1.68E-125 | 0.448391692 | 0.36  | 0.172 | 5.40E-121 | 0 IGSF3      |



|           |             |       |       |           |               |
|-----------|-------------|-------|-------|-----------|---------------|
| 8.82E-124 | 0.447877365 | 0.922 | 0.767 | 2.83E-119 | 0 NAALADL2    |
| 3.69E-92  | 0.446716195 | 0.527 | 0.345 | 1.18E-87  | 0 BCL2L14     |
| 0         | 0.446193679 | 0.258 | 0.052 | 0         | 0 POGLUT3     |
| 1.36E-110 | 0.445148648 | 0.506 | 0.302 | 4.36E-106 | 0 PITPNM2     |
| 6.77E-110 | 0.444860591 | 0.512 | 0.307 | 2.17E-105 | 0 RUSC2       |
| 3.00E-165 | 0.440391462 | 0.349 | 0.138 | 9.64E-161 | 0 TMTC1       |
| 2.42E-78  | 0.437465965 | 0.575 | 0.4   | 7.76E-74  | 0 TCAIM       |
| 7.43E-92  | 0.437333156 | 0.686 | 0.48  | 2.38E-87  | 0 DSCAML1     |
| 1.13E-210 | 0.436497444 | 0.325 | 0.109 | 3.62E-206 | 0 GSDME       |
| 6.64E-89  | 0.434896145 | 0.657 | 0.458 | 2.13E-84  | 0 GALNT18     |
| 2.55E-92  | 0.434340766 | 0.438 | 0.259 | 8.18E-88  | 0 AC009690.1  |
| 9.85E-96  | 0.431862155 | 0.501 | 0.299 | 3.16E-91  | 0 UPP2        |
| 1.02E-98  | 0.42822465  | 0.536 | 0.347 | 3.29E-94  | 0 CMC1        |
| 2.29E-145 | 0.427507375 | 0.384 | 0.173 | 7.36E-141 | 0 AC016705.2  |
| 6.53E-153 | 0.426840564 | 0.97  | 0.811 | 2.10E-148 | 0 BICC1       |
| 1.19E-90  | 0.426636497 | 0.63  | 0.454 | 3.81E-86  | 0 SLC35F5     |
| 1.03E-126 | 0.426597285 | 0.519 | 0.292 | 3.30E-122 | 0 DNASE1      |
| 6.93E-87  | 0.425677351 | 0.637 | 0.455 | 2.22E-82  | 0 CDK8        |
| 2.82E-142 | 0.425600678 | 0.307 | 0.127 | 9.07E-138 | 0 DNAJC25     |
| 1.26E-93  | 0.42557366  | 0.78  | 0.597 | 4.05E-89  | 0 DNAH14      |
| 1.25E-108 | 0.422167873 | 0.348 | 0.174 | 4.01E-104 | 0 FDX1        |
| 4.18E-84  | 0.421819625 | 0.287 | 0.147 | 1.34E-79  | 0 PRDM10      |
| 2.35E-99  | 0.419968137 | 0.495 | 0.305 | 7.54E-95  | 0 LRP6        |
| 1.04E-90  | 0.419597392 | 0.257 | 0.119 | 3.36E-86  | 0 SNAPC1      |
| 2.47E-200 | 0.418172603 | 0.65  | 0.317 | 7.94E-196 | 0 LINC01606   |
| 1.22E-69  | 0.417836193 | 0.532 | 0.357 | 3.93E-65  | 0 PLXNB1      |
| 6.30E-17  | 0.417791369 | 0.477 | 0.412 | 2.02E-12  | 0 LHFPL3      |
| 3.13E-98  | 0.417720775 | 0.516 | 0.326 | 1.00E-93  | 0 AHCYL1      |
| 5.59E-54  | 0.417391001 | 0.448 | 0.3   | 1.79E-49  | 0 GNGT1       |
| 1.73E-101 | 0.417251662 | 0.651 | 0.459 | 5.55E-97  | 0 OGDH        |
| 4.08E-84  | 0.416820386 | 0.705 | 0.523 | 1.31E-79  | 0 KIAA1958    |
| 6.38E-103 | 0.415941049 | 0.74  | 0.526 | 2.05E-98  | 0 CYFIP2      |
| 5.19E-72  | 0.41511213  | 0.534 | 0.379 | 1.67E-67  | 0 RNF10       |
| 3.07E-85  | 0.412565566 | 0.835 | 0.646 | 9.87E-81  | 0 PPARGC1A    |
| 7.21E-117 | 0.412505893 | 0.441 | 0.241 | 2.31E-112 | 0 SLC36A4     |
| 1.37E-97  | 0.41207473  | 0.636 | 0.431 | 4.39E-93  | 0 AC245297.3  |
| 2.86E-120 | 0.411900895 | 0.458 | 0.242 | 9.19E-116 | 0 PANTR1      |
| 1.39E-70  | 0.409391796 | 0.855 | 0.725 | 4.48E-66  | 0 OXR1        |
| 2.04E-103 | 0.408334543 | 0.535 | 0.333 | 6.57E-99  | 0 GABARAPL1   |
| 4.44E-134 | 0.408318556 | 0.333 | 0.145 | 1.43E-129 | 0 JAG1        |
| 5.91E-112 | 0.407769002 | 0.615 | 0.391 | 1.90E-107 | 0 BACH2       |
| 2.39E-162 | 0.405293701 | 0.311 | 0.118 | 7.66E-158 | 0 MFSD4A      |
| 5.25E-106 | 0.403675776 | 0.389 | 0.206 | 1.69E-101 | 0 HHAT        |
| 2.11E-97  | 0.400619753 | 0.46  | 0.278 | 6.78E-93  | 0 PLA2G12A    |
| 5.53E-87  | 0.399955081 | 0.605 | 0.424 | 1.77E-82  | 0 PREPL       |
| 0         | 0.39926044  | 1     | 1     | 0         | 0 MALAT1      |
| 1.22E-89  | 0.398892911 | 0.572 | 0.388 | 3.90E-85  | 0 PPM1B       |
| 2.87E-98  | 0.398596785 | 0.893 | 0.691 | 9.21E-94  | 0 ADAMTS9-AS2 |
| 7.60E-80  | 0.398473353 | 0.652 | 0.478 | 2.44E-75  | 0 CBR4        |
| 6.67E-86  | 0.397880385 | 0.706 | 0.559 | 2.14E-81  | 0 CLASP2      |
| 1.05E-48  | 0.397354714 | 0.391 | 0.263 | 3.37E-44  | 0 GPR39       |

|           |             |       |       |           |                |
|-----------|-------------|-------|-------|-----------|----------------|
| 4.82E-79  | 0.39685746  | 0.758 | 0.602 | 1.55E-74  | 0 AUH          |
| 1.47E-118 | 0.395303531 | 0.28  | 0.119 | 4.71E-114 | 0 ARSDP1       |
| 1.98E-99  | 0.39309566  | 0.318 | 0.157 | 6.37E-95  | 0 SLC25A30     |
| 9.52E-68  | 0.392528526 | 0.566 | 0.403 | 3.06E-63  | 0 STXBP4       |
| 2.45E-122 | 0.392317132 | 0.313 | 0.138 | 7.86E-118 | 0 CCDC148-AS1  |
| 5.56E-80  | 0.392157491 | 0.607 | 0.426 | 1.79E-75  | 0 LRRC37A4P    |
| 3.33E-68  | 0.391483988 | 0.569 | 0.415 | 1.07E-63  | 0 C1QTNF3-AMAC |
| 3.01E-93  | 0.391407091 | 0.776 | 0.575 | 9.68E-89  | 0 ADAMTS9      |
| 4.99E-66  | 0.389421135 | 0.569 | 0.401 | 1.60E-61  | 0 ERICH1       |
| 1.56E-115 | 0.389076257 | 0.372 | 0.187 | 5.00E-111 | 0 AC036214.3   |
| 4.88E-75  | 0.38825126  | 0.648 | 0.477 | 1.57E-70  | 0 PAWR         |
| 3.30E-118 | 0.388082089 | 0.506 | 0.275 | 1.06E-113 | 0 VAX2         |
| 2.01E-71  | 0.387627978 | 0.74  | 0.57  | 6.46E-67  | 0 PDE7B        |
| 3.67E-79  | 0.387499193 | 0.786 | 0.613 | 1.18E-74  | 0 CLMN         |
| 1.27E-104 | 0.386870559 | 0.431 | 0.237 | 4.09E-100 | 0 MSH2         |
| 1.49E-83  | 0.385092109 | 0.853 | 0.735 | 4.80E-79  | 0 FBXL17       |
| 1.35E-129 | 0.382098875 | 0.295 | 0.123 | 4.33E-125 | 0 NEXN         |
| 1.45E-95  | 0.381848528 | 0.37  | 0.204 | 4.65E-91  | 0 CPNE3        |
| 8.89E-81  | 0.381689793 | 0.609 | 0.428 | 2.86E-76  | 0 NFYC         |
| 2.27E-98  | 0.381566489 | 0.687 | 0.465 | 7.30E-94  | 0 MFHAS1       |
| 1.31E-93  | 0.379663661 | 0.872 | 0.706 | 4.21E-89  | 0 DANT2        |
| 1.72E-88  | 0.37609058  | 0.562 | 0.376 | 5.52E-84  | 0 TP53BP1      |
| 2.42E-83  | 0.375588169 | 0.743 | 0.583 | 7.79E-79  | 0 ZNF518A      |
| 1.77E-76  | 0.375247505 | 0.492 | 0.322 | 5.69E-72  | 0 ACSL3        |
| 5.61E-92  | 0.373477839 | 0.269 | 0.126 | 1.80E-87  | 0 ANXA3        |
| 3.45E-76  | 0.372133273 | 0.537 | 0.364 | 1.11E-71  | 0 TTC7B        |
| 2.29E-79  | 0.371971043 | 0.59  | 0.419 | 7.35E-75  | 0 SECISBP2L    |
| 6.41E-63  | 0.371036267 | 0.542 | 0.386 | 2.06E-58  | 0 MAGED1       |
| 6.78E-106 | 0.370441333 | 0.416 | 0.229 | 2.18E-101 | 0 AC083843.2   |
| 5.08E-163 | 0.370381045 | 0.255 | 0.085 | 1.63E-158 | 0 PLAC4        |
| 3.02E-79  | 0.369177051 | 0.664 | 0.481 | 9.70E-75  | 0 PTPN3        |
| 8.60E-84  | 0.368636219 | 0.533 | 0.353 | 2.76E-79  | 0 OIP5-AS1     |
| 3.55E-78  | 0.368088146 | 0.676 | 0.502 | 1.14E-73  | 0 ATP6V1H      |
| 1.00E-68  | 0.36730119  | 0.688 | 0.526 | 3.22E-64  | 0 HIBADH       |
| 1.99E-102 | 0.367248322 | 0.798 | 0.591 | 6.38E-98  | 0 PRKD1        |
| 5.94E-115 | 0.367047418 | 0.72  | 0.47  | 1.91E-110 | 0 HIP1         |
| 1.16E-82  | 0.364739365 | 0.748 | 0.55  | 3.73E-78  | 0 FAM160A1     |
| 3.12E-129 | 0.363624743 | 0.292 | 0.121 | 1.00E-124 | 0 EPB41L4B     |
| 1.52E-93  | 0.363085008 | 0.452 | 0.264 | 4.87E-89  | 0 SGMS2        |
| 6.95E-67  | 0.361656824 | 0.312 | 0.174 | 2.23E-62  | 0 MBOAT1       |
| 2.38E-179 | 0.3608036   | 0.639 | 0.332 | 7.63E-175 | 0 MYO1B        |
| 1.49E-82  | 0.359362238 | 0.821 | 0.672 | 4.79E-78  | 0 MTR          |
| 2.65E-22  | 0.359027373 | 0.327 | 0.248 | 8.53E-18  | 0 SPON2        |
| 1.25E-75  | 0.358682574 | 0.466 | 0.302 | 4.01E-71  | 0 ABCB7        |
| 1.35E-81  | 0.3583287   | 0.884 | 0.792 | 4.33E-77  | 0 SNHG14       |
| 1.79E-94  | 0.358094504 | 0.341 | 0.176 | 5.75E-90  | 0 RAP2C        |
| 1.13E-83  | 0.357791137 | 0.437 | 0.257 | 3.62E-79  | 0 NUDT4        |
| 2.33E-74  | 0.357483302 | 0.493 | 0.329 | 7.49E-70  | 0 ATP5F1C      |
| 3.69E-87  | 0.35731288  | 0.542 | 0.364 | 1.19E-82  | 0 SLC25A27     |
| 7.99E-74  | 0.354318562 | 0.632 | 0.471 | 2.57E-69  | 0 SNX9         |
| 1.15E-118 | 0.35396439  | 0.923 | 0.817 | 3.68E-114 | 0 PTPRG        |

|           |             |       |       |           |                |
|-----------|-------------|-------|-------|-----------|----------------|
| 1.65E-108 | 0.35248208  | 0.868 | 0.645 | 5.29E-104 | 0 NHS          |
| 1.90E-79  | 0.351620291 | 0.447 | 0.277 | 6.11E-75  | 0 DNAJC11      |
| 1.30E-116 | 0.351054674 | 0.328 | 0.152 | 4.18E-112 | 0 FZD4         |
| 4.04E-94  | 0.349672255 | 0.456 | 0.263 | 1.30E-89  | 0 TRMT9B       |
| 9.21E-70  | 0.349293494 | 0.649 | 0.487 | 2.96E-65  | 0 ARFGEF2      |
| 3.84E-89  | 0.346525567 | 0.281 | 0.136 | 1.23E-84  | 0 GYG2P1       |
| 3.15E-69  | 0.3460752   | 0.671 | 0.514 | 1.01E-64  | 0 RIC1         |
| 9.83E-67  | 0.345529127 | 0.602 | 0.435 | 3.16E-62  | 0 ZNF586       |
| 2.76E-56  | 0.345164508 | 0.765 | 0.622 | 8.88E-52  | 0 CRADD        |
| 1.58E-66  | 0.344350196 | 0.538 | 0.378 | 5.08E-62  | 0 LNPEP        |
| 3.04E-82  | 0.343328167 | 0.479 | 0.296 | 9.76E-78  | 0 Z98752.3     |
| 9.70E-85  | 0.343025879 | 0.629 | 0.405 | 3.11E-80  | 0 CPM          |
| 7.51E-66  | 0.342720728 | 0.64  | 0.484 | 2.41E-61  | 0 NAP1L4       |
| 2.93E-92  | 0.340593742 | 0.448 | 0.257 | 9.41E-88  | 0 SORL1        |
| 4.88E-107 | 0.338628841 | 0.602 | 0.376 | 1.57E-102 | 0 MYO5A        |
| 3.25E-55  | 0.338114924 | 0.53  | 0.383 | 1.04E-50  | 0 LRRC28       |
| 7.25E-100 | 0.338063452 | 0.73  | 0.478 | 2.33E-95  | 0 SKAP1        |
| 2.15E-78  | 0.337664319 | 0.252 | 0.122 | 6.89E-74  | 0 KLRD1        |
| 1.84E-32  | 0.337522878 | 0.359 | 0.259 | 5.89E-28  | 0 AC092535.4   |
| 3.92E-136 | 0.337237465 | 0.252 | 0.092 | 1.26E-131 | 0 PLCD4        |
| 3.15E-56  | 0.336746855 | 0.579 | 0.422 | 1.01E-51  | 0 CCDC171      |
| 1.62E-63  | 0.336740861 | 0.599 | 0.437 | 5.21E-59  | 0 BMPR1A       |
| 3.44E-47  | 0.336684696 | 0.557 | 0.419 | 1.11E-42  | 0 SUCLG2-AS1   |
| 4.07E-52  | 0.336573777 | 0.702 | 0.563 | 1.31E-47  | 0 SUPT3H       |
| 1.21E-66  | 0.335987194 | 0.437 | 0.28  | 3.88E-62  | 0 RTN3         |
| 1.16E-86  | 0.335848919 | 0.366 | 0.2   | 3.72E-82  | 0 AL132780.1   |
| 1.50E-103 | 0.335400126 | 0.768 | 0.545 | 4.81E-99  | 0 DCDC2        |
| 1.89E-77  | 0.3353362   | 0.514 | 0.346 | 6.07E-73  | 0 UHRF2        |
| 2.46E-84  | 0.335087292 | 0.42  | 0.247 | 7.89E-80  | 0 BMERB1       |
| 8.27E-37  | 0.334791491 | 0.404 | 0.291 | 2.66E-32  | 0 LINC02694    |
| 1.23E-123 | 0.334377643 | 0.297 | 0.127 | 3.96E-119 | 0 HSBP1L1      |
| 1.25E-63  | 0.333976218 | 0.718 | 0.55  | 4.01E-59  | 0 ZNF704       |
| 9.55E-74  | 0.332684397 | 0.601 | 0.424 | 3.07E-69  | 0 SLC25A16     |
| 1.85E-61  | 0.332334998 | 0.508 | 0.356 | 5.93E-57  | 0 SMIM8        |
| 6.75E-77  | 0.330748965 | 0.643 | 0.444 | 2.17E-72  | 0 PRR5-ARHGAP8 |
| 2.79E-72  | 0.330325111 | 0.51  | 0.334 | 8.95E-68  | 0 SCML1        |
| 5.39E-81  | 0.330226003 | 0.42  | 0.25  | 1.73E-76  | 0 GSTO2        |
| 1.46E-73  | 0.330070789 | 0.79  | 0.659 | 4.67E-69  | 0 MAP4K3       |
| 1.45E-54  | 0.329791361 | 0.656 | 0.51  | 4.67E-50  | 0 MAP4K3-DT    |
| 2.27E-80  | 0.327670989 | 0.885 | 0.789 | 7.28E-76  | 0 SOX6         |
| 5.49E-113 | 0.327401382 | 0.353 | 0.166 | 1.76E-108 | 0 GAS6         |
| 2.14E-52  | 0.326892822 | 0.536 | 0.392 | 6.87E-48  | 0 MIPOL1       |
| 5.41E-83  | 0.326616017 | 0.351 | 0.19  | 1.74E-78  | 0 MAP3K15      |
| 2.74E-69  | 0.3265603   | 0.765 | 0.613 | 8.79E-65  | 0 AC027644.4   |
| 8.90E-72  | 0.326012785 | 0.605 | 0.442 | 2.86E-67  | 0 DHX15        |
| 8.95E-63  | 0.325408276 | 0.657 | 0.499 | 2.87E-58  | 0 AC068205.2   |
| 3.64E-10  | 0.325212764 | 0.263 | 0.21  | 1.17E-05  | 0 CALB1        |
| 3.13E-83  | 0.324858542 | 0.27  | 0.132 | 1.01E-78  | 0 ANO5         |
| 6.70E-41  | 0.324169659 | 0.635 | 0.512 | 2.15E-36  | 0 UBA6-AS1     |
| 1.26E-57  | 0.323030657 | 0.398 | 0.255 | 4.05E-53  | 0 EPM2A        |
| 1.03E-84  | 0.322470275 | 0.383 | 0.213 | 3.32E-80  | 0 OVOL2        |

|           |             |       |       |           |               |
|-----------|-------------|-------|-------|-----------|---------------|
| 1.59E-63  | 0.322036578 | 0.601 | 0.449 | 5.10E-59  | 0 PIAS2       |
| 1.54E-96  | 0.321128919 | 0.385 | 0.205 | 4.93E-92  | 0 ARRDC3      |
| 4.78E-70  | 0.321120652 | 0.298 | 0.161 | 1.53E-65  | 0 PRTG        |
| 1.60E-98  | 0.320928633 | 0.363 | 0.189 | 5.15E-94  | 0 BTBD3       |
| 1.27E-99  | 0.319806317 | 0.287 | 0.131 | 4.09E-95  | 0 RAB31       |
| 2.31E-60  | 0.319092054 | 0.586 | 0.43  | 7.43E-56  | 0 VPS50       |
| 4.85E-68  | 0.318590981 | 0.462 | 0.298 | 1.56E-63  | 0 RPS6KA6     |
| 3.90E-32  | 0.318296125 | 0.357 | 0.252 | 1.25E-27  | 0 LINC01266   |
| 9.64E-61  | 0.317861555 | 0.472 | 0.316 | 3.09E-56  | 0 SPRED1      |
| 2.91E-38  | 0.316438191 | 0.791 | 0.72  | 9.33E-34  | 0 GLS         |
| 4.42E-90  | 0.315640943 | 0.557 | 0.346 | 1.42E-85  | 0 TMEM72-AS1  |
| 1.90E-49  | 0.314489283 | 0.529 | 0.392 | 6.10E-45  | 0 CDC14B      |
| 2.45E-53  | 0.313017875 | 0.691 | 0.555 | 7.86E-49  | 0 TLK1        |
| 3.27E-63  | 0.312420096 | 0.583 | 0.425 | 1.05E-58  | 0 SLC25A36    |
| 1.02E-79  | 0.312379945 | 0.275 | 0.137 | 3.29E-75  | 0 CA2         |
| 2.81E-63  | 0.312055887 | 0.355 | 0.213 | 9.03E-59  | 0 OSBP2       |
| 7.45E-52  | 0.311151303 | 0.521 | 0.375 | 2.39E-47  | 0 OXNAD1      |
| 3.39E-56  | 0.310951838 | 0.554 | 0.393 | 1.09E-51  | 0 TPD52       |
| 1.88E-143 | 0.31056618  | 0.765 | 0.476 | 6.03E-139 | 0 NAV2        |
| 2.89E-61  | 0.31049507  | 0.42  | 0.272 | 9.28E-57  | 0 DSTN        |
| 1.89E-83  | 0.309802447 | 0.324 | 0.172 | 6.08E-79  | 0 CARNMT1     |
| 4.69E-53  | 0.309497346 | 0.622 | 0.47  | 1.51E-48  | 0 SLC44A3-AS1 |
| 7.35E-55  | 0.309357599 | 0.405 | 0.267 | 2.36E-50  | 0 SETDB2      |
| 3.41E-57  | 0.30918606  | 0.344 | 0.212 | 1.09E-52  | 0 REST        |
| 5.43E-98  | 0.308873155 | 0.35  | 0.178 | 1.74E-93  | 0 SEPTIN6     |
| 1.87E-119 | 0.308824224 | 0.32  | 0.138 | 6.02E-115 | 0 TFAP2B      |
| 7.79E-80  | 0.307548453 | 0.617 | 0.417 | 2.50E-75  | 0 RGL3        |
| 6.40E-57  | 0.307359077 | 0.416 | 0.27  | 2.06E-52  | 0 TMEM164     |
| 2.42E-60  | 0.306584668 | 0.573 | 0.413 | 7.78E-56  | 0 ATP2C1      |
| 3.81E-98  | 0.306169497 | 0.372 | 0.191 | 1.22E-93  | 0 RGS3        |
| 4.64E-61  | 0.303966239 | 0.566 | 0.407 | 1.49E-56  | 0 CDK12       |
| 2.23E-25  | 0.303865985 | 0.726 | 0.636 | 7.18E-21  | 0 SIK2        |
| 1.53E-73  | 0.303508316 | 0.434 | 0.268 | 4.91E-69  | 0 PWWP2A      |
| 5.90E-76  | 0.302980184 | 0.29  | 0.149 | 1.89E-71  | 0 STK32A      |
| 9.52E-88  | 0.302895535 | 0.453 | 0.261 | 3.06E-83  | 0 MTURN       |
| 2.80E-50  | 0.302549859 | 0.735 | 0.599 | 9.00E-46  | 0 CHCHD3      |
| 4.47E-46  | 0.302513767 | 0.705 | 0.585 | 1.44E-41  | 0 CTBP2       |
| 1.15E-56  | 0.302460653 | 0.446 | 0.298 | 3.68E-52  | 0 BCL9        |
| 1.25E-70  | 0.302339758 | 0.477 | 0.311 | 4.00E-66  | 0 MFF         |
| 1.84E-62  | 0.302091813 | 0.463 | 0.308 | 5.91E-58  | 0 IP6K1       |
| 8.28E-48  | 0.300207501 | 0.591 | 0.448 | 2.66E-43  | 0 RNF130      |
| 3.69E-41  | 0.299898138 | 0.41  | 0.293 | 1.18E-36  | 0 APLP2       |
| 1.22E-50  | 0.299806986 | 0.742 | 0.602 | 3.91E-46  | 0 AHI1        |
| 1.01E-47  | 0.298337302 | 0.776 | 0.659 | 3.23E-43  | 0 PDE8A       |
| 1.58E-55  | 0.298275213 | 0.468 | 0.316 | 5.08E-51  | 0 CKMT2-AS1   |
| 2.04E-68  | 0.298087132 | 0.891 | 0.813 | 6.54E-64  | 0 PCCA        |
| 8.31E-83  | 0.297945397 | 0.551 | 0.339 | 2.67E-78  | 0 GRHL2       |
| 1.21E-59  | 0.297580842 | 0.506 | 0.353 | 3.90E-55  | 0 ZC3H13      |
| 1.55E-50  | 0.297536262 | 0.636 | 0.496 | 4.99E-46  | 0 DENND1B     |
| 7.43E-68  | 0.296719547 | 0.649 | 0.46  | 2.39E-63  | 0 GNG12-AS1   |
| 5.76E-70  | 0.29615916  | 0.384 | 0.231 | 1.85E-65  | 0 TSG101      |

|           |             |       |       |           |               |
|-----------|-------------|-------|-------|-----------|---------------|
| 7.44E-62  | 0.295344876 | 0.414 | 0.266 | 2.39E-57  | 0 HOOK1       |
| 9.05E-55  | 0.293973853 | 0.717 | 0.584 | 2.91E-50  | 0 TUT4        |
| 1.22E-54  | 0.293763491 | 0.622 | 0.473 | 3.92E-50  | 0 SNRPN       |
| 1.36E-30  | 0.293672082 | 0.568 | 0.451 | 4.38E-26  | 0 ANKRD36B    |
| 9.46E-80  | 0.293352973 | 0.682 | 0.491 | 3.04E-75  | 0 TANC1       |
| 8.57E-39  | 0.293052485 | 0.413 | 0.287 | 2.75E-34  | 0 AC092683.1  |
| 5.34E-62  | 0.292891941 | 0.683 | 0.501 | 1.72E-57  | 0 DPY19L2     |
| 9.13E-78  | 0.292575538 | 0.686 | 0.492 | 2.93E-73  | 0 PDE4DIP     |
| 2.75E-66  | 0.292415068 | 0.375 | 0.227 | 8.83E-62  | 0 DDAH1       |
| 2.04E-55  | 0.29066475  | 0.66  | 0.514 | 6.56E-51  | 0 TRA2A       |
| 3.39E-61  | 0.290318291 | 0.531 | 0.37  | 1.09E-56  | 0 ZFYVE9      |
| 6.60E-61  | 0.289694815 | 0.437 | 0.286 | 2.12E-56  | 0 HSPA4L      |
| 1.23E-83  | 0.289592401 | 0.538 | 0.328 | 3.95E-79  | 0 CSGALNACT1  |
| 6.51E-50  | 0.289233353 | 0.865 | 0.789 | 2.09E-45  | 0 SIK3        |
| 1.29E-56  | 0.288241207 | 0.566 | 0.41  | 4.14E-52  | 0 SMURF2      |
| 1.60E-64  | 0.28802273  | 0.396 | 0.248 | 5.15E-60  | 0 MRPL19      |
| 7.17E-68  | 0.287841892 | 0.499 | 0.323 | 2.30E-63  | 0 TMMEM116    |
| 1.31E-44  | 0.287834788 | 0.635 | 0.501 | 4.20E-40  | 0 TAOK3       |
| 7.51E-62  | 0.287807115 | 0.43  | 0.277 | 2.41E-57  | 0 AGL         |
| 1.99E-49  | 0.287305359 | 0.549 | 0.411 | 6.39E-45  | 0 LMBRD1      |
| 3.87E-76  | 0.285720592 | 0.268 | 0.135 | 1.24E-71  | 0 TSPOAP1-AS1 |
| 4.67E-64  | 0.285646059 | 0.37  | 0.225 | 1.50E-59  | 0 UBA1        |
| 7.08E-50  | 0.285371813 | 0.629 | 0.488 | 2.27E-45  | 0 SLC30A9     |
| 6.15E-59  | 0.285220958 | 0.519 | 0.361 | 1.97E-54  | 0 UQCRC2      |
| 5.38E-39  | 0.285118377 | 0.443 | 0.318 | 1.73E-34  | 0 PLS3        |
| 3.86E-78  | 0.284949551 | 0.76  | 0.563 | 1.24E-73  | 0 CPEB3       |
| 8.25E-36  | 0.28404214  | 0.496 | 0.375 | 2.65E-31  | 0 AL589935.1  |
| 1.19E-58  | 0.283843318 | 0.464 | 0.309 | 3.82E-54  | 0 HECTD2      |
| 2.36E-66  | 0.283814459 | 0.348 | 0.201 | 7.59E-62  | 0 ZDHHC13     |
| 5.64E-46  | 0.28352776  | 0.508 | 0.371 | 1.81E-41  | 0 FSD1L       |
| 4.56E-54  | 0.283416136 | 0.501 | 0.352 | 1.47E-49  | 0 CCDC66      |
| 1.67E-46  | 0.282963649 | 0.331 | 0.21  | 5.37E-42  | 0 PRKAR1B     |
| 3.42E-28  | 0.282761702 | 0.417 | 0.324 | 1.10E-23  | 0 TTN-AS1     |
| 7.25E-60  | 0.282238298 | 0.672 | 0.494 | 2.33E-55  | 0 LLGL2       |
| 1.06E-67  | 0.281584694 | 0.781 | 0.613 | 3.41E-63  | 0 THRB        |
| 1.61E-54  | 0.280965269 | 0.442 | 0.292 | 5.16E-50  | 0 ASXL3       |
| 4.91E-50  | 0.280945297 | 0.518 | 0.372 | 1.58E-45  | 0 CPT1A       |
| 3.75E-71  | 0.279586905 | 0.399 | 0.234 | 1.20E-66  | 0 AC018730.1  |
| 8.10E-62  | 0.279132556 | 0.373 | 0.228 | 2.60E-57  | 0 ZDHHC3      |
| 3.62E-118 | 0.278800075 | 0.269 | 0.108 | 1.16E-113 | 0 GNB4        |
| 5.82E-45  | 0.278460752 | 0.612 | 0.47  | 1.87E-40  | 0 ZNF44       |
| 1.71E-80  | 0.277923617 | 0.338 | 0.181 | 5.48E-76  | 0 TBC1D24     |
| 1.81E-54  | 0.277423017 | 0.759 | 0.629 | 5.82E-50  | 0 PHLDB2      |
| 1.05E-65  | 0.276278089 | 0.328 | 0.186 | 3.36E-61  | 0 GOLM1       |
| 3.59E-41  | 0.27508348  | 0.737 | 0.617 | 1.15E-36  | 0 CAMKMT      |
| 3.40E-53  | 0.27439319  | 0.616 | 0.468 | 1.09E-48  | 0 FXR1        |
| 8.08E-53  | 0.27434751  | 0.723 | 0.544 | 2.60E-48  | 0 DST         |
| 8.16E-63  | 0.274198383 | 0.332 | 0.189 | 2.62E-58  | 0 PPFIA2      |
| 1.43E-80  | 0.273626106 | 0.646 | 0.413 | 4.60E-76  | 0 PRDM16      |
| 2.49E-75  | 0.27350485  | 0.307 | 0.162 | 7.98E-71  | 0 ESRP1       |
| 3.68E-75  | 0.273011747 | 0.335 | 0.186 | 1.18E-70  | 0 TRMT13      |

|           |             |       |       |           |              |
|-----------|-------------|-------|-------|-----------|--------------|
| 8.38E-52  | 0.272563701 | 0.597 | 0.452 | 2.69E-47  | 0 SF3B1      |
| 1.69E-62  | 0.272324963 | 0.339 | 0.199 | 5.42E-58  | 0 SMS        |
| 2.59E-119 | 0.271192841 | 0.613 | 0.364 | 8.33E-115 | 0 INPP4B     |
| 1.85E-66  | 0.270531812 | 0.322 | 0.184 | 5.94E-62  | 0 CISD1      |
| 3.11E-28  | 0.270053253 | 0.445 | 0.344 | 9.98E-24  | 0 ATP2A2     |
| 3.30E-66  | 0.269818619 | 0.389 | 0.235 | 1.06E-61  | 0 SIN3B      |
| 3.19E-45  | 0.269305441 | 0.53  | 0.391 | 1.02E-40  | 0 CDYL       |
| 4.10E-69  | 0.269206782 | 0.283 | 0.152 | 1.32E-64  | 0 PPP1R42    |
| 1.11E-20  | 0.269193605 | 0.625 | 0.532 | 3.57E-16  | 0 TULP4      |
| 1.72E-47  | 0.269144276 | 0.618 | 0.463 | 5.52E-43  | 0 STRBP      |
| 9.04E-57  | 0.26906257  | 0.437 | 0.289 | 2.90E-52  | 0 FEZ2       |
| 1.34E-57  | 0.268465108 | 0.355 | 0.213 | 4.30E-53  | 0 RNF24      |
| 4.92E-82  | 0.268318904 | 0.636 | 0.435 | 1.58E-77  | 0 TXNIP      |
| 9.34E-57  | 0.267896647 | 0.435 | 0.285 | 3.00E-52  | 0 ZNRF2P2    |
| 1.44E-60  | 0.267340905 | 0.776 | 0.596 | 4.61E-56  | 0 SULT1C2    |
| 1.67E-47  | 0.267065496 | 0.492 | 0.354 | 5.38E-43  | 0 KLHL24     |
| 8.23E-47  | 0.266689334 | 0.677 | 0.539 | 2.64E-42  | 0 AC138409.2 |
| 7.12E-58  | 0.266681347 | 0.399 | 0.249 | 2.29E-53  | 0 SGK2       |
| 6.62E-47  | 0.265969153 | 0.65  | 0.505 | 2.13E-42  | 0 AC124312.1 |
| 2.64E-45  | 0.265349998 | 0.414 | 0.281 | 8.49E-41  | 0 KIF9-AS1   |
| 5.05E-47  | 0.264934766 | 0.282 | 0.169 | 1.62E-42  | 0 HLF        |
| 7.54E-54  | 0.264755824 | 0.366 | 0.226 | 2.42E-49  | 0 COL6A1     |
| 7.45E-61  | 0.263820345 | 0.48  | 0.311 | 2.39E-56  | 0 CFAP221    |
| 2.47E-47  | 0.263463244 | 0.383 | 0.256 | 7.92E-43  | 0 PPTC7      |
| 6.52E-45  | 0.263306688 | 0.502 | 0.365 | 2.10E-40  | 0 KANSL3     |
| 1.12E-69  | 0.262875578 | 0.646 | 0.456 | 3.58E-65  | 0 AC241952.1 |
| 6.52E-64  | 0.262800584 | 0.298 | 0.165 | 2.10E-59  | 0 NFE2L3     |
| 1.88E-52  | 0.262651972 | 0.391 | 0.257 | 6.04E-48  | 0 FASTKD1    |
| 2.13E-44  | 0.262492547 | 0.499 | 0.366 | 6.83E-40  | 0 IMMP1L     |
| 1.26E-55  | 0.262468834 | 0.392 | 0.248 | 4.04E-51  | 0 SLC44A3    |
| 1.23E-72  | 0.262320906 | 0.263 | 0.131 | 3.96E-68  | 0 ADCY5      |
| 5.43E-53  | 0.262248097 | 0.252 | 0.141 | 1.74E-48  | 0 GPRC5D-AS1 |
| 1.32E-70  | 0.260524685 | 0.333 | 0.182 | 4.22E-66  | 0 FAM184A    |
| 1.83E-42  | 0.260255223 | 0.671 | 0.528 | 5.87E-38  | 0 CBFA2T2    |
| 2.21E-64  | 0.259570319 | 0.315 | 0.176 | 7.09E-60  | 0 NR2F1-AS1  |
| 4.70E-34  | 0.258860782 | 0.286 | 0.188 | 1.51E-29  | 0 CDC37L1    |
| 1.15E-61  | 0.258384624 | 0.31  | 0.176 | 3.70E-57  | 0 PALM       |
| 3.89E-52  | 0.258181424 | 0.328 | 0.201 | 1.25E-47  | 0 RNF213-AS1 |
| 2.50E-60  | 0.258174943 | 0.358 | 0.218 | 8.02E-56  | 0 GCFC2      |
| 1.90E-140 | 0.257553418 | 0.472 | 0.23  | 6.11E-136 | 0 GS1-24F4.2 |
| 2.72E-59  | 0.257532963 | 0.311 | 0.182 | 8.72E-55  | 0 ACP6       |
| 1.09E-63  | 0.256025199 | 0.744 | 0.556 | 3.49E-59  | 0 ASAP2      |
| 4.11E-48  | 0.254604838 | 0.44  | 0.304 | 1.32E-43  | 0 TMEM161B   |
| 1.01E-38  | 0.254580744 | 0.686 | 0.564 | 3.25E-34  | 0 SPIN1      |
| 6.26E-51  | 0.254529855 | 0.915 | 0.847 | 2.01E-46  | 0 RERE       |
| 3.95E-36  | 0.253878355 | 0.522 | 0.4   | 1.27E-31  | 0 WDR27      |
| 1.65E-33  | 0.253277127 | 0.467 | 0.35  | 5.31E-29  | 0 LINC01184  |
| 5.70E-54  | 0.252630185 | 0.449 | 0.302 | 1.83E-49  | 0 ACTR3B     |
| 7.33E-49  | 0.25183746  | 0.374 | 0.244 | 2.35E-44  | 0 TFB1M      |
| 2.94E-68  | 0.251519089 | 0.805 | 0.658 | 9.45E-64  | 0 SHROOM3    |
| 3.70E-36  | 0.2509947   | 0.698 | 0.587 | 1.19E-31  | 0 TENT2      |

|           |             |       |       |           |              |
|-----------|-------------|-------|-------|-----------|--------------|
| 6.37E-71  | 0.250529816 | 0.557 | 0.361 | 2.05E-66  | 0 EFHD1      |
| 1.53E-67  | 0.250206131 | 0.268 | 0.137 | 4.92E-63  | 0 PLCZ1      |
| 1.27E-64  | 0.250028003 | 0.327 | 0.187 | 4.09E-60  | 0 RAVER2     |
| 0         | 2.754431751 | 0.892 | 0.465 | 0         | 1 SLC8A1     |
| 0         | 2.653966278 | 0.804 | 0.197 | 0         | 1 LINC01098  |
| 0         | 2.592955242 | 0.765 | 0.283 | 0         | 1 SLC8A1-AS1 |
| 0         | 2.115043258 | 0.866 | 0.396 | 0         | 1 HSD11B2    |
| 5.86E-270 | 2.015852698 | 0.499 | 0.201 | 1.88E-265 | 1 SNTG1      |
| 0         | 2.014252091 | 0.575 | 0.098 | 0         | 1 SCNN1G     |
| 6.55E-302 | 1.864945297 | 0.814 | 0.67  | 2.10E-297 | 1 NFE2L2     |
| 0         | 1.849905351 | 0.686 | 0.149 | 0         | 1 PWRN1      |
| 0         | 1.799116877 | 0.923 | 0.672 | 0         | 1 CADPS2     |
| 0         | 1.784836466 | 0.661 | 0.161 | 0         | 1 APCDD1L-DT |
| 0         | 1.759750586 | 0.988 | 0.743 | 0         | 1 AC019197.1 |
| 0         | 1.696126916 | 0.76  | 0.4   | 0         | 1 TMTC2      |
| 0         | 1.655903693 | 0.848 | 0.376 | 0         | 1 PIK3C2G    |
| 0         | 1.525199503 | 0.768 | 0.343 | 0         | 1 SOX5       |
| 4.81E-243 | 1.518596737 | 0.474 | 0.191 | 1.55E-238 | 1 CALB1      |
| 0         | 1.488886543 | 0.852 | 0.416 | 0         | 1 TEX41      |
| 0         | 1.468792887 | 0.433 | 0.077 | 0         | 1 SCNN1B     |
| 0         | 1.447109093 | 0.581 | 0.259 | 0         | 1 RALBP1     |
| 0         | 1.406323857 | 0.796 | 0.426 | 0         | 1 SCN2A      |
| 0         | 1.402687577 | 0.548 | 0.165 | 0         | 1 GATA3      |
| 0         | 1.399660184 | 0.752 | 0.31  | 0         | 1 BMPR1B     |
| 0         | 1.388237159 | 0.882 | 0.519 | 0         | 1 GRIP1      |
| 0         | 1.386207654 | 0.414 | 0.094 | 0         | 1 SLC9A4     |
| 1.31E-218 | 1.283092971 | 0.41  | 0.148 | 4.22E-214 | 1 KCNIP1     |
| 2.50E-296 | 1.261029756 | 0.722 | 0.421 | 8.04E-292 | 1 C11orf80   |
| 3.13E-222 | 1.259333436 | 0.404 | 0.149 | 1.01E-217 | 1 TMEM178A   |
| 5.90E-179 | 1.243912778 | 0.413 | 0.179 | 1.89E-174 | 1 ARG2       |
| 0         | 1.243388048 | 0.999 | 0.971 | 0         | 1 PDE4D      |
| 1.22E-267 | 1.218754468 | 0.653 | 0.353 | 3.92E-263 | 1 CRYBG1     |
| 7.67E-158 | 1.213175107 | 0.424 | 0.201 | 2.46E-153 | 1 B4GALNT3   |
| 2.32E-300 | 1.210045111 | 0.593 | 0.249 | 7.46E-296 | 1 NRCAM      |
| 0         | 1.20675411  | 0.881 | 0.586 | 0         | 1 TRPM3      |
| 5.04E-228 | 1.191510964 | 0.812 | 0.64  | 1.62E-223 | 1 RAD51B     |
| 0         | 1.18169174  | 0.758 | 0.378 | 0         | 1 MPPE2      |
| 3.07E-200 | 1.179504839 | 0.538 | 0.263 | 9.86E-196 | 1 MID1       |
| 0         | 1.175615561 | 0.896 | 0.691 | 0         | 1 FRAS1      |
| 3.52E-216 | 1.173376513 | 0.648 | 0.371 | 1.13E-211 | 1 ADAMTS16   |
| 1.87E-268 | 1.172075179 | 0.789 | 0.564 | 6.00E-264 | 1 LAMB1      |
| 4.74E-240 | 1.162801694 | 0.704 | 0.417 | 1.52E-235 | 1 PRDM16     |
| 0         | 1.1456685   | 0.352 | 0.086 | 0         | 1 HMGCS2     |
| 0         | 1.144757707 | 0.908 | 0.683 | 0         | 1 WSB1       |
| 9.51E-253 | 1.140757487 | 0.791 | 0.553 | 3.06E-248 | 1 DCDC2      |
| 3.29E-224 | 1.128816548 | 0.738 | 0.463 | 1.06E-219 | 1 TOX3       |
| 1.07E-172 | 1.123967812 | 0.405 | 0.168 | 3.42E-168 | 1 HSPA1B     |
| 9.52E-185 | 1.12260357  | 0.671 | 0.486 | 3.06E-180 | 1 EYA3       |
| 6.30E-163 | 1.118229683 | 0.563 | 0.328 | 2.02E-158 | 1 SLC38A1    |
| 0         | 1.116567484 | 0.953 | 0.813 | 0         | 1 COBL1      |
| 1.82E-146 | 1.105923575 | 0.479 | 0.247 | 5.84E-142 | 1 KITLG      |

|           |             |       |       |           |              |
|-----------|-------------|-------|-------|-----------|--------------|
| 1.78E-193 | 1.093519895 | 0.36  | 0.124 | 5.73E-189 | 1 PCDH7      |
| 0         | 1.080748163 | 0.899 | 0.599 | 0         | 1 PRKG1      |
| 3.42E-158 | 1.079245117 | 0.391 | 0.169 | 1.10E-153 | 1 HUNK       |
| 1.08E-293 | 1.078665671 | 0.922 | 0.663 | 3.45E-289 | 1 KAZN       |
| 1.95E-148 | 1.078098687 | 0.407 | 0.187 | 6.28E-144 | 1 FSTL4      |
| 1.07E-191 | 1.075112334 | 0.508 | 0.238 | 3.42E-187 | 1 MSR1       |
| 2.37E-88  | 1.073512384 | 0.461 | 0.296 | 7.61E-84  | 1 ATP1B3     |
| 4.68E-21  | 1.070389923 | 0.254 | 0.189 | 1.50E-16  | 1 ZNF331     |
| 3.29E-230 | 1.064309166 | 0.432 | 0.157 | 1.06E-225 | 1 AC011586.1 |
| 3.36E-168 | 1.057551062 | 0.628 | 0.401 | 1.08E-163 | 1 KCNQ1      |
| 1.45E-118 | 1.05546874  | 0.529 | 0.347 | 4.66E-114 | 1 STIM2      |
| 1.89E-221 | 1.042086419 | 0.813 | 0.651 | 6.06E-217 | 1 PTPN13     |
| 7.14E-205 | 1.038927583 | 0.531 | 0.264 | 2.29E-200 | 1 SCN3A      |
| 1.66E-97  | 1.031820282 | 0.326 | 0.154 | 5.32E-93  | 1 EYA4       |
| 1.40E-156 | 1.020297009 | 0.617 | 0.394 | 4.49E-152 | 1 CDK6       |
| 5.53E-60  | 1.016424698 | 0.434 | 0.309 | 1.78E-55  | 1 SLC45A4    |
| 4.40E-160 | 1.014051748 | 0.565 | 0.337 | 1.41E-155 | 1 SGPP1      |
| 2.68E-153 | 1.009683823 | 0.475 | 0.241 | 8.60E-149 | 1 PDE3B      |
| 1.75E-87  | 1.008965308 | 0.459 | 0.29  | 5.63E-83  | 1 LINC02694  |
| 6.22E-184 | 1.004773386 | 0.305 | 0.098 | 2.00E-179 | 1 KCNK13     |
| 5.08E-179 | 1.001976445 | 0.778 | 0.582 | 1.63E-174 | 1 PRKAG2     |
| 1.56E-153 | 0.989420556 | 0.537 | 0.3   | 5.00E-149 | 1 FAM110B    |
| 3.75E-272 | 0.984441355 | 0.92  | 0.773 | 1.20E-267 | 1 GLIS3      |
| 4.34E-97  | 0.982507296 | 0.495 | 0.334 | 1.39E-92  | 1 MAP3K21    |
| 1.00E-305 | 0.977663407 | 0.925 | 0.763 | 3.21E-301 | 1 ARL15      |
| 9.08E-155 | 0.971046012 | 0.498 | 0.271 | 2.91E-150 | 1 ADAM22     |
| 5.23E-191 | 0.970375486 | 0.539 | 0.253 | 1.68E-186 | 1 FYB2       |
| 2.12E-183 | 0.968608157 | 0.642 | 0.394 | 6.82E-179 | 1 FAM171A1   |
| 6.89E-114 | 0.9669628   | 0.421 | 0.228 | 2.21E-109 | 1 PIGQ       |
| 2.86E-150 | 0.966791809 | 0.722 | 0.525 | 9.20E-146 | 1 ABTB2      |
| 5.78E-99  | 0.955997348 | 0.713 | 0.563 | 1.86E-94  | 1 RALYL      |
| 3.89E-205 | 0.943507209 | 0.381 | 0.136 | 1.25E-200 | 1 TBX2       |
| 1.06E-83  | 0.943249545 | 0.268 | 0.126 | 3.39E-79  | 1 IL1RAPL1   |
| 3.67E-224 | 0.943082668 | 0.871 | 0.674 | 1.18E-219 | 1 AGLB4      |
| 3.11E-134 | 0.939134301 | 0.572 | 0.362 | 9.99E-130 | 1 CDH16      |
| 5.78E-138 | 0.927297889 | 0.37  | 0.161 | 1.86E-133 | 1 ANGPT1     |
| 1.63E-162 | 0.922987073 | 0.444 | 0.207 | 5.22E-158 | 1 PRDM16-DT  |
| 2.86E-114 | 0.912282454 | 0.596 | 0.402 | 9.18E-110 | 1 LHFPL3     |
| 3.58E-59  | 0.906323436 | 0.475 | 0.339 | 1.15E-54  | 1 ST6GAL1    |
| 3.17E-172 | 0.900745795 | 0.74  | 0.565 | 1.02E-167 | 1 ASAP2      |
| 1.98E-161 | 0.89780142  | 0.438 | 0.2   | 6.35E-157 | 1 RIMBP2     |
| 2.03E-182 | 0.897633454 | 0.747 | 0.501 | 6.50E-178 | 1 FREM1      |
| 9.90E-136 | 0.889950728 | 0.678 | 0.509 | 3.18E-131 | 1 DPY19L2    |
| 5.94E-196 | 0.882117962 | 0.825 | 0.649 | 1.91E-191 | 1 LIMCH1     |
| 3.59E-164 | 0.881786075 | 0.469 | 0.22  | 1.15E-159 | 1 EMX1       |
| 1.06E-206 | 0.881574407 | 0.339 | 0.109 | 3.40E-202 | 1 BARX2      |
| 5.75E-188 | 0.872705802 | 0.512 | 0.236 | 1.85E-183 | 1 RHBG       |
| 4.54E-104 | 0.864170137 | 0.45  | 0.259 | 1.46E-99  | 1 ZNF208     |
| 1.77E-84  | 0.861532632 | 0.387 | 0.225 | 5.68E-80  | 1 VEPH1      |
| 1.57E-79  | 0.859263089 | 0.452 | 0.295 | 5.05E-75  | 1 SUSD1      |
| 2.37E-173 | 0.858573958 | 0.884 | 0.786 | 7.60E-169 | 1 RBPMS      |



|           |             |       |       |           |               |
|-----------|-------------|-------|-------|-----------|---------------|
| 2.05E-109 | 0.858060312 | 0.528 | 0.347 | 6.59E-105 | 1 HIP1R       |
| 1.13E-115 | 0.852015149 | 0.52  | 0.306 | 3.62E-111 | 1 CCDC178     |
| 4.80E-40  | 0.847766246 | 0.266 | 0.161 | 1.54E-35  | 1 RGS6        |
| 2.98E-112 | 0.844400727 | 0.36  | 0.178 | 9.57E-108 | 1 IQUB        |
| 4.64E-131 | 0.844303937 | 0.652 | 0.459 | 1.49E-126 | 1 SPIRE1      |
| 2.48E-127 | 0.835933921 | 0.287 | 0.108 | 7.96E-123 | 1 AQP2        |
| 7.93E-198 | 0.83389003  | 0.299 | 0.089 | 2.55E-193 | 1 AL512662.1  |
| 4.45E-201 | 0.83250756  | 0.285 | 0.08  | 1.43E-196 | 1 FGD3        |
| 4.53E-128 | 0.830741614 | 0.458 | 0.244 | 1.46E-123 | 1 AC022414.1  |
| 1.31E-65  | 0.829609527 | 0.389 | 0.241 | 4.20E-61  | 1 KIF26B      |
| 4.69E-109 | 0.821759315 | 0.341 | 0.163 | 1.51E-104 | 1 INPP5J      |
| 2.92E-209 | 0.816507603 | 0.899 | 0.782 | 9.36E-205 | 1 NR3C2       |
| 1.17E-246 | 0.813465849 | 0.978 | 0.762 | 3.77E-242 | 1 MECOM       |
| 1.25E-96  | 0.813360385 | 0.36  | 0.185 | 4.01E-92  | 1 PFKFB3      |
| 1.05E-60  | 0.812215909 | 0.487 | 0.367 | 3.37E-56  | 1 VAV2        |
| 5.25E-114 | 0.808668027 | 0.382 | 0.188 | 1.69E-109 | 1 RERGL       |
| 4.78E-92  | 0.808020613 | 0.55  | 0.391 | 1.54E-87  | 1 MYO5A       |
| 5.42E-122 | 0.802806321 | 0.348 | 0.159 | 1.74E-117 | 1 PLPP4       |
| 1.14E-110 | 0.797911959 | 0.695 | 0.542 | 3.65E-106 | 1 STARD13     |
| 9.56E-99  | 0.792158658 | 0.59  | 0.397 | 3.07E-94  | 1 SCIN        |
| 9.37E-100 | 0.788987889 | 0.27  | 0.115 | 3.01E-95  | 1 HS6ST1      |
| 1.87E-88  | 0.782702597 | 0.58  | 0.436 | 5.99E-84  | 1 HDAC4       |
| 2.35E-68  | 0.782251562 | 0.629 | 0.516 | 7.56E-64  | 1 PAX8        |
| 1.59E-107 | 0.76687379  | 0.622 | 0.461 | 5.12E-103 | 1 HOXD3       |
| 1.77E-98  | 0.766469602 | 0.687 | 0.545 | 5.69E-94  | 1 STK33       |
| 2.68E-123 | 0.749821873 | 0.395 | 0.196 | 8.60E-119 | 1 SLC38A11    |
| 2.54E-101 | 0.749397261 | 0.44  | 0.244 | 8.17E-97  | 1 GS1-24F4.2  |
| 1.89E-159 | 0.745655284 | 0.62  | 0.347 | 6.07E-155 | 1 MYO1B       |
| 1.46E-103 | 0.741079303 | 0.266 | 0.109 | 4.70E-99  | 1 SLC9A2      |
| 6.40E-119 | 0.739243149 | 0.338 | 0.149 | 2.06E-114 | 1 AC011586.2  |
| 1.35E-86  | 0.734839404 | 0.374 | 0.206 | 4.32E-82  | 1 EML6        |
| 8.52E-77  | 0.734718438 | 0.564 | 0.425 | 2.74E-72  | 1 SRGAP3      |
| 6.94E-98  | 0.734621638 | 0.653 | 0.477 | 2.23E-93  | 1 HOXB3       |
| 1.20E-62  | 0.734043701 | 0.29  | 0.155 | 3.86E-58  | 1 LINC01482   |
| 4.80E-161 | 0.733701546 | 0.891 | 0.7   | 1.54E-156 | 1 ADAMTS9-AS2 |
| 1.23E-188 | 0.725507982 | 0.88  | 0.593 | 3.94E-184 | 1 KCNIP4      |
| 1.76E-140 | 0.724129038 | 0.817 | 0.671 | 5.64E-136 | 1 WNK1        |
| 1.22E-78  | 0.723069139 | 0.685 | 0.552 | 3.93E-74  | 1 MYO1E       |
| 1.13E-60  | 0.721878162 | 0.316 | 0.18  | 3.64E-56  | 1 BTG2        |
| 3.64E-80  | 0.721457589 | 0.271 | 0.124 | 1.17E-75  | 1 HSPA1A      |
| 1.79E-74  | 0.721272521 | 0.548 | 0.368 | 5.74E-70  | 1 PCDH9       |
| 3.58E-62  | 0.712111754 | 0.619 | 0.515 | 1.15E-57  | 1 PTBP3       |
| 3.00E-51  | 0.707789625 | 0.53  | 0.443 | 9.63E-47  | 1 MTMR10      |
| 6.58E-126 | 0.705597883 | 0.809 | 0.681 | 2.11E-121 | 1 FHOD3       |
| 1.08E-98  | 0.705390817 | 0.29  | 0.128 | 3.46E-94  | 1 RHCG        |
| 2.67E-74  | 0.703685823 | 0.358 | 0.205 | 8.57E-70  | 1 SYK         |
| 1.43E-60  | 0.697730355 | 0.679 | 0.643 | 4.59E-56  | 1 FRG1HP      |
| 3.01E-60  | 0.697649035 | 0.299 | 0.168 | 9.66E-56  | 1 SLC7A1      |
| 2.01E-138 | 0.695440683 | 0.294 | 0.109 | 6.44E-134 | 1 AFAP1L2     |
| 1.58E-146 | 0.693793809 | 0.279 | 0.097 | 5.08E-142 | 1 CWH43       |
| 1.42E-67  | 0.689605443 | 0.604 | 0.499 | 4.57E-63  | 1 MIR3936HG   |

|           |             |       |       |             |                |
|-----------|-------------|-------|-------|-------------|----------------|
| 5.65E-82  | 0.689274295 | 0.667 | 0.546 | 1.82E-77    | 1 TPST1        |
| 5.39E-45  | 0.687623833 | 0.274 | 0.158 | 1.73E-40    | 1 GDF15        |
| 8.24E-53  | 0.685796841 | 0.405 | 0.289 | 2.65E-48    | 1 SLC11A2      |
| 5.20E-60  | 0.684533128 | 0.46  | 0.333 | 1.67E-55    | 1 CASZ1        |
| 3.04E-84  | 0.683723708 | 0.592 | 0.443 | 9.78E-80    | 1 ARHGEF10L    |
| 6.00E-101 | 0.680839017 | 0.306 | 0.138 | 1.93E-96    | 1 PLCZ1        |
| 1.31E-56  | 0.677412712 | 0.526 | 0.408 | 4.22E-52    | 1 TMEM51       |
| 1.65E-65  | 0.677039719 | 0.489 | 0.354 | 5.29E-61    | 1 SPATS2       |
| 1.29E-68  | 0.677001255 | 0.27  | 0.135 | 4.13E-64    | 1 LHX1         |
| 3.24E-176 | 0.675024089 | 0.935 | 0.821 | 1.04E-171   | 1 BICC1        |
| 5.71E-93  | 0.670621675 | 0.806 | 0.768 | 1.83E-88    | 1 AFF1         |
| 5.40E-07  | 0.669429121 | 0.37  | 0.364 | 0.017355917 | 1 HSP90AA1     |
| 8.81E-77  | 0.66780989  | 0.442 | 0.264 | 2.83E-72    | 1 KCTD8        |
| 1.42E-94  | 0.665335802 | 0.252 | 0.105 | 4.56E-90    | 1 HOXD9        |
| 3.93E-56  | 0.662908582 | 0.554 | 0.428 | 1.26E-51    | 1 ALOX12P2     |
| 2.68E-65  | 0.661135593 | 0.581 | 0.463 | 8.60E-61    | 1 EPB41L1      |
| 4.78E-63  | 0.65791118  | 0.331 | 0.195 | 1.53E-58    | 1 SLC25A29     |
| 9.60E-38  | 0.657757955 | 0.313 | 0.217 | 3.08E-33    | 1 MAL2         |
| 1.86E-69  | 0.655652303 | 0.572 | 0.424 | 5.98E-65    | 1 KCNJ3        |
| 1.56E-52  | 0.643378304 | 0.361 | 0.239 | 5.01E-48    | 1 AIF1L        |
| 2.09E-88  | 0.64336485  | 0.647 | 0.474 | 6.73E-84    | 1 NDRG1        |
| 2.29E-89  | 0.640618073 | 0.281 | 0.128 | 7.37E-85    | 1 HMGA2        |
| 3.95E-64  | 0.639055144 | 0.633 | 0.502 | 1.27E-59    | 1 IVNS1ABP     |
| 4.21E-90  | 0.631307275 | 0.277 | 0.124 | 1.35E-85    | 1 PSMA1        |
| 8.00E-143 | 0.630117944 | 0.895 | 0.776 | 2.57E-138   | 1 NAALADL2     |
| 2.54E-67  | 0.625979095 | 0.394 | 0.241 | 8.14E-63    | 1 TRPV4        |
| 5.12E-94  | 0.624472802 | 0.546 | 0.336 | 1.64E-89    | 1 CSGALNACT1   |
| 4.76E-81  | 0.620700977 | 0.303 | 0.154 | 1.53E-76    | 1 RASGRP1      |
| 1.15E-41  | 0.620583626 | 0.428 | 0.311 | 3.69E-37    | 1 DUSP1        |
| 2.20E-32  | 0.620293349 | 0.344 | 0.254 | 7.07E-28    | 1 CHSY1        |
| 1.97E-43  | 0.620144793 | 0.51  | 0.398 | 6.34E-39    | 1 DPH6-DT      |
| 5.71E-74  | 0.612968804 | 0.779 | 0.738 | 1.83E-69    | 1 NFAT5        |
| 2.72E-57  | 0.612877409 | 0.599 | 0.501 | 8.75E-53    | 1 TANC2        |
| 1.46E-99  | 0.612179595 | 0.825 | 0.778 | 4.68E-95    | 1 SETBP1       |
| 4.06E-28  | 0.608592027 | 0.381 | 0.308 | 1.30E-23    | 1 KIZ          |
| 1.43E-62  | 0.60846981  | 0.312 | 0.175 | 4.58E-58    | 1 KCNS3        |
| 7.81E-34  | 0.607966163 | 0.393 | 0.3   | 2.51E-29    | 1 CYS1         |
| 2.48E-74  | 0.606727913 | 0.578 | 0.406 | 7.98E-70    | 1 COL4A5       |
| 4.36E-40  | 0.603340506 | 0.381 | 0.276 | 1.40E-35    | 1 PLEKHA2      |
| 3.18E-56  | 0.602692652 | 0.57  | 0.476 | 1.02E-51    | 1 ARHGEF35-AS1 |
| 7.55E-70  | 0.602369408 | 0.671 | 0.562 | 2.42E-65    | 1 ZNF704       |
| 1.39E-59  | 0.601914298 | 0.61  | 0.488 | 4.46E-55    | 1 MLLT3        |
| 2.86E-58  | 0.596130946 | 0.373 | 0.234 | 9.17E-54    | 1 NPAS2        |
| 3.97E-65  | 0.594843267 | 0.259 | 0.132 | 1.27E-60    | 1 SPTBN2       |
| 7.24E-30  | 0.594690484 | 0.356 | 0.264 | 2.32E-25    | 1 AC092535.4   |
| 3.88E-61  | 0.594263297 | 0.63  | 0.549 | 1.25E-56    | 1 TRAK1        |
| 6.84E-51  | 0.591647757 | 0.402 | 0.265 | 2.20E-46    | 1 KSR2         |
| 6.72E-25  | 0.58955026  | 0.982 | 0.987 | 2.16E-20    | 1 FP671120.4   |
| 5.42E-52  | 0.588367454 | 0.255 | 0.139 | 1.74E-47    | 1 FAM81A       |
| 9.89E-48  | 0.584843783 | 0.523 | 0.413 | 3.18E-43    | 1 GTF2IRD1     |
| 3.27E-44  | 0.584221003 | 0.457 | 0.336 | 1.05E-39    | 1 PAPP         |

|          |             |       |       |          |              |
|----------|-------------|-------|-------|----------|--------------|
| 6.38E-52 | 0.583024184 | 0.482 | 0.356 | 2.05E-47 | 1 GRHL2      |
| 1.26E-23 | 0.58181797  | 0.424 | 0.351 | 4.03E-19 | 1 RNLS       |
| 9.16E-79 | 0.581578836 | 0.573 | 0.411 | 2.94E-74 | 1 BICD1      |
| 1.74E-43 | 0.581246289 | 0.495 | 0.378 | 5.59E-39 | 1 SIM1       |
| 3.97E-53 | 0.57934648  | 0.683 | 0.622 | 1.27E-48 | 1 GAREM1     |
| 4.93E-73 | 0.578186977 | 0.746 | 0.617 | 1.58E-68 | 1 LINC02532  |
| 3.71E-67 | 0.577632122 | 0.63  | 0.515 | 1.19E-62 | 1 OPHN1      |
| 3.73E-56 | 0.572066922 | 0.472 | 0.331 | 1.20E-51 | 1 BLNK       |
| 7.27E-42 | 0.571567593 | 0.526 | 0.435 | 2.33E-37 | 1 RGL3       |
| 2.17E-45 | 0.56615688  | 0.507 | 0.384 | 6.96E-41 | 1 TOX        |
| 1.52E-36 | 0.56520765  | 0.398 | 0.294 | 4.89E-32 | 1 FOSL2      |
| 6.22E-55 | 0.558111944 | 0.735 | 0.709 | 2.00E-50 | 1 ERC1       |
| 1.25E-19 | 0.554232332 | 0.369 | 0.301 | 4.02E-15 | 1 ABCB1      |
| 3.29E-44 | 0.553761081 | 0.558 | 0.492 | 1.06E-39 | 1 DOCK7      |
| 1.19E-47 | 0.553558939 | 0.322 | 0.206 | 3.83E-43 | 1 HOXA3      |
| 1.19E-27 | 0.552602986 | 0.389 | 0.312 | 3.81E-23 | 1 DZIP3      |
| 1.45E-41 | 0.54606931  | 0.266 | 0.161 | 4.65E-37 | 1 NIPAL1     |
| 1.02E-10 | 0.543944034 | 0.428 | 0.407 | 3.27E-06 | 1 VPS37B     |
| 5.86E-62 | 0.541103672 | 0.292 | 0.157 | 1.88E-57 | 1 TPM4       |
| 1.15E-64 | 0.541003996 | 0.283 | 0.15  | 3.68E-60 | 1 TTC39C     |
| 3.33E-38 | 0.540858547 | 0.666 | 0.634 | 1.07E-33 | 1 AL138752.2 |
| 2.28E-40 | 0.537390841 | 0.396 | 0.284 | 7.33E-36 | 1 CDH1       |
| 5.01E-33 | 0.535798132 | 0.432 | 0.345 | 1.61E-28 | 1 AC092944.1 |
| 1.79E-87 | 0.531736135 | 0.867 | 0.81  | 5.73E-83 | 1 MAPK10     |
| 3.89E-52 | 0.530921875 | 0.633 | 0.535 | 1.25E-47 | 1 PAX2       |
| 3.54E-32 | 0.528257186 | 0.27  | 0.176 | 1.14E-27 | 1 AL365295.1 |
| 7.47E-19 | 0.527237547 | 0.359 | 0.292 | 2.40E-14 | 1 MAL        |
| 9.76E-25 | 0.527137395 | 0.405 | 0.33  | 3.13E-20 | 1 FLG-AS1    |
| 3.36E-18 | 0.526408394 | 0.32  | 0.252 | 1.08E-13 | 1 SPON2      |
| 5.02E-28 | 0.521602881 | 0.541 | 0.475 | 1.61E-23 | 1 FAAH2      |
| 1.15E-72 | 0.519788696 | 0.705 | 0.599 | 3.69E-68 | 1 CCDC198    |
| 1.78E-19 | 0.518601001 | 0.342 | 0.277 | 5.71E-15 | 1 PTGR1      |
| 2.37E-47 | 0.514559714 | 0.45  | 0.32  | 7.62E-43 | 1 ZNF98      |
| 3.56E-33 | 0.513585716 | 0.508 | 0.438 | 1.14E-28 | 1 MYH10      |
| 1.29E-61 | 0.512680187 | 0.818 | 0.783 | 4.14E-57 | 1 BCAS3      |
| 7.84E-63 | 0.512356917 | 0.261 | 0.135 | 2.52E-58 | 1 HOXD10     |
| 2.00E-41 | 0.509073702 | 0.776 | 0.711 | 6.43E-37 | 1 ATP1B1     |
| 3.87E-52 | 0.507036416 | 0.286 | 0.164 | 1.24E-47 | 1 ABO        |
| 1.88E-14 | 0.505968348 | 0.493 | 0.46  | 6.04E-10 | 1 FAM107B    |
| 1.11E-79 | 0.505319953 | 0.8   | 0.703 | 3.57E-75 | 1 PRKCA      |
| 3.19E-40 | 0.504796441 | 0.613 | 0.497 | 1.02E-35 | 1 LRP1B      |
| 1.69E-45 | 0.502409215 | 0.528 | 0.396 | 5.41E-41 | 1 CLCNKA     |
| 2.34E-24 | 0.501789309 | 0.388 | 0.311 | 7.52E-20 | 1 SH3BGRL    |
| 6.43E-50 | 0.500679204 | 0.288 | 0.168 | 2.07E-45 | 1 PRTG       |
| 1.55E-37 | 0.5006528   | 0.655 | 0.581 | 4.99E-33 | 1 WWC1       |
| 3.82E-32 | 0.500470438 | 0.998 | 0.998 | 1.23E-27 | 1 HFM1       |
| 9.82E-33 | 0.499031079 | 0.614 | 0.571 | 3.15E-28 | 1 SSH2       |
| 3.63E-18 | 0.494661517 | 0.405 | 0.355 | 1.17E-13 | 1 EMX2OS     |
| 9.62E-13 | 0.494156901 | 0.517 | 0.525 | 3.09E-08 | 1 RNF19A     |
| 9.24E-41 | 0.49387948  | 0.591 | 0.512 | 2.97E-36 | 1 C4orf19    |
| 1.51E-32 | 0.48928713  | 0.411 | 0.306 | 4.86E-28 | 1 GPRIN3     |

|           |             |       |       |             |                |
|-----------|-------------|-------|-------|-------------|----------------|
| 5.12E-36  | 0.488121375 | 0.522 | 0.425 | 1.64E-31    | 1 SCNN1A       |
| 5.07E-57  | 0.487336802 | 0.279 | 0.152 | 1.63E-52    | 1 TRERF1       |
| 3.99E-40  | 0.487078768 | 0.272 | 0.163 | 1.28E-35    | 1 COL4A6       |
| 5.13E-50  | 0.48560269  | 0.26  | 0.144 | 1.65E-45    | 1 LHX1-DT      |
| 2.80E-59  | 0.482127685 | 0.751 | 0.658 | 8.99E-55    | 1 PAX8-AS1     |
| 3.88E-21  | 0.480845802 | 0.494 | 0.44  | 1.25E-16    | 1 SEPTIN9      |
| 2.03E-30  | 0.480484331 | 0.574 | 0.524 | 6.51E-26    | 1 MAP4K3-DT    |
| 1.70E-37  | 0.477923366 | 0.612 | 0.527 | 5.46E-33    | 1 TLN2         |
| 6.36E-18  | 0.477509429 | 0.419 | 0.373 | 2.04E-13    | 1 BCAR3        |
| 1.37E-17  | 0.477465651 | 0.307 | 0.251 | 4.39E-13    | 1 PGM5         |
| 2.85E-44  | 0.476947316 | 0.275 | 0.164 | 9.14E-40    | 1 LHFPL3-AS2   |
| 5.53E-47  | 0.476812687 | 0.707 | 0.673 | 1.78E-42    | 1 MAP4K3       |
| 2.00E-29  | 0.471919073 | 0.447 | 0.358 | 6.41E-25    | 1 SYTL2        |
| 1.31E-55  | 0.471638137 | 0.55  | 0.373 | 4.21E-51    | 1 KCNJ15       |
| 7.62E-40  | 0.47076387  | 0.487 | 0.37  | 2.45E-35    | 1 GLDC         |
| 3.87E-31  | 0.470660629 | 0.466 | 0.389 | 1.24E-26    | 1 AC074386.1   |
| 7.15E-18  | 0.468837009 | 0.389 | 0.336 | 2.30E-13    | 1 CREM         |
| 2.68E-39  | 0.46849242  | 0.441 | 0.319 | 8.62E-35    | 1 Tmprss2      |
| 1.91E-25  | 0.468175772 | 0.48  | 0.397 | 6.12E-21    | 1 TBC1D9       |
| 3.74E-09  | 0.467758827 | 0.263 | 0.222 | 0.000120067 | 1 NFKBIZ       |
| 1.30E-23  | 0.465191806 | 0.464 | 0.399 | 4.19E-19    | 1 OGDHL        |
| 3.35E-39  | 0.463538509 | 0.512 | 0.406 | 1.08E-34    | 1 ITGA2        |
| 1.33E-136 | 0.461786133 | 0.974 | 0.775 | 4.26E-132   | 1 CCSER1       |
| 1.87E-23  | 0.461277331 | 0.524 | 0.48  | 6.00E-19    | 1 ZFYVE16      |
| 4.23E-24  | 0.453014736 | 0.583 | 0.541 | 1.36E-19    | 1 SPAG16       |
| 7.74E-51  | 0.452971447 | 0.765 | 0.675 | 2.49E-46    | 1 THSD7A       |
| 8.43E-46  | 0.451277697 | 0.56  | 0.425 | 2.71E-41    | 1 CLCNKB       |
| 1.98E-27  | 0.450401408 | 0.525 | 0.462 | 6.36E-23    | 1 SREBF2       |
| 5.07E-24  | 0.448349583 | 0.267 | 0.185 | 1.63E-19    | 1 MBOAT1       |
| 8.43E-40  | 0.445035766 | 0.675 | 0.611 | 2.71E-35    | 1 LRRFIP1      |
| 7.86E-30  | 0.443474891 | 0.59  | 0.536 | 2.52E-25    | 1 CYRIB        |
| 1.72E-23  | 0.435624074 | 0.357 | 0.284 | 5.53E-19    | 1 AC139769.1   |
| 4.22E-32  | 0.434270553 | 0.362 | 0.248 | 1.36E-27    | 1 XIST         |
| 1.38E-14  | 0.434247317 | 0.402 | 0.356 | 4.43E-10    | 1 TEX9         |
| 5.91E-20  | 0.431865509 | 0.441 | 0.385 | 1.90E-15    | 1 HNF1B        |
| 5.35E-21  | 0.43149116  | 0.559 | 0.536 | 1.72E-16    | 1 MRPL33       |
| 2.95E-19  | 0.429165968 | 0.376 | 0.316 | 9.48E-15    | 1 RAB11FIP2    |
| 8.31E-102 | 0.428072693 | 0.976 | 0.868 | 2.67E-97    | 1 PKHD1        |
| 9.87E-23  | 0.427756117 | 0.518 | 0.465 | 3.17E-18    | 1 PRR5-ARHGAP8 |
| 2.97E-19  | 0.424324802 | 0.299 | 0.225 | 9.54E-15    | 1 KCNJ1        |
| 5.84E-12  | 0.417634944 | 0.435 | 0.403 | 1.88E-07    | 1 PHACTR2      |
| 9.07E-11  | 0.417218197 | 0.462 | 0.417 | 2.91E-06    | 1 SLC16A7      |
| 2.51E-18  | 0.416934838 | 0.296 | 0.224 | 8.05E-14    | 1 TNFRSF19     |
| 6.83E-11  | 0.416931157 | 0.384 | 0.353 | 2.19E-06    | 1 PDE9A        |
| 4.13E-10  | 0.416497402 | 0.396 | 0.37  | 1.33E-05    | 1 MBP          |
| 1.61E-18  | 0.415612178 | 0.545 | 0.514 | 5.18E-14    | 1 LLGL2        |
| 2.70E-27  | 0.410832206 | 0.445 | 0.353 | 8.69E-23    | 1 SGPP2        |
| 2.04E-08  | 0.408902733 | 0.635 | 0.642 | 0.000655404 | 1 SLC05A1      |
| 1.51E-22  | 0.406985912 | 0.45  | 0.377 | 4.84E-18    | 1 IPCEF1       |
| 8.82E-22  | 0.404832225 | 0.351 | 0.275 | 2.83E-17    | 1 SORL1        |
| 7.62E-11  | 0.404110952 | 0.265 | 0.22  | 2.45E-06    | 1 SPAG17       |

|            |             |       |       |             |              |
|------------|-------------|-------|-------|-------------|--------------|
| 1.20E-08   | 0.403916349 | 0.355 | 0.334 | 0.000385385 | 1 CKMT2-AS1  |
| 2.73E-57   | 0.401679838 | 0.649 | 0.507 | 8.78E-53    | 1 RHOBTB3    |
| 3.35E-18   | 0.400357496 | 0.36  | 0.299 | 1.08E-13    | 1 PHTF2      |
| 5.18E-31   | 0.400340694 | 0.646 | 0.605 | 1.66E-26    | 1 CD2AP      |
| 3.96E-32   | 0.397701785 | 0.708 | 0.658 | 1.27E-27    | 1 SAMD12     |
| 5.87E-17   | 0.397306632 | 0.36  | 0.296 | 1.88E-12    | 1 RAPGEF3    |
| 2.66E-25   | 0.396121065 | 0.663 | 0.622 | 8.56E-21    | 1 PPP1R9A    |
| 2.91E-10   | 0.396083121 | 0.49  | 0.487 | 9.34E-06    | 1 CYSTM1     |
| 4.19E-11   | 0.394673735 | 0.502 | 0.504 | 1.35E-06    | 1 NUP214     |
| 3.46E-11   | 0.393935077 | 0.334 | 0.295 | 1.11E-06    | 1 EIPR1      |
| 8.86E-42   | 0.393482309 | 0.66  | 0.526 | 2.85E-37    | 1 MYO10      |
| 8.31E-17   | 0.393440161 | 0.368 | 0.306 | 2.67E-12    | 1 MST1L      |
| 2.92E-14   | 0.393282881 | 0.296 | 0.236 | 9.39E-10    | 1 LINC01036  |
| 1.23E-20   | 0.39182634  | 0.38  | 0.313 | 3.95E-16    | 1 IQCK       |
| 2.21E-17   | 0.390660041 | 0.52  | 0.467 | 7.09E-13    | 1 LINC01725  |
| 4.83E-10   | 0.390402574 | 0.343 | 0.312 | 1.55E-05    | 1 RBM41      |
| 4.95E-12   | 0.389615353 | 0.313 | 0.267 | 1.59E-07    | 1 RPH3AL     |
| 1.43E-21   | 0.389561372 | 0.266 | 0.193 | 4.58E-17    | 1 ZNF43      |
| 3.71E-25   | 0.389312604 | 0.342 | 0.248 | 1.19E-20    | 1 AC068547.1 |
| 1.78E-32   | 0.388826889 | 0.473 | 0.369 | 5.72E-28    | 1 AC004593.2 |
| 1.52E-16   | 0.387293361 | 0.298 | 0.237 | 4.87E-12    | 1 SLC38A2    |
| 1.33E-37   | 0.383865885 | 0.436 | 0.312 | 4.29E-33    | 1 MACC1      |
| 3.65E-12   | 0.383518713 | 0.253 | 0.207 | 1.17E-07    | 1 GSTM4      |
| 2.08E-35   | 0.383034508 | 0.589 | 0.503 | 6.68E-31    | 1 ARHGEF3    |
| 4.79E-13   | 0.380062787 | 0.4   | 0.354 | 1.54E-08    | 1 RAP1GAP2   |
| 1.43E-14   | 0.379898071 | 0.257 | 0.199 | 4.59E-10    | 1 TMEM72     |
| 6.91E-35   | 0.379210943 | 0.62  | 0.557 | 2.22E-30    | 1 ADGRL2     |
| 1.71E-55   | 0.377256538 | 0.332 | 0.188 | 5.49E-51    | 1 ADGRF1     |
| 7.19E-13   | 0.376233379 | 0.502 | 0.492 | 2.31E-08    | 1 SNRPN      |
| 2.78E-47   | 0.375600795 | 0.527 | 0.382 | 8.91E-43    | 1 MYO3B      |
| 5.30E-59   | 0.375035329 | 0.534 | 0.367 | 1.70E-54    | 1 FRY        |
| 9.35E-14   | 0.370635599 | 0.305 | 0.254 | 3.00E-09    | 1 SLC35B4    |
| 1.20E-51   | 0.370568818 | 0.86  | 0.83  | 3.86E-47    | 1 DDX17      |
| 4.17E-32   | 0.370446491 | 0.763 | 0.757 | 1.34E-27    | 1 BABAM2     |
| 1.53E-27   | 0.369756796 | 0.705 | 0.696 | 4.92E-23    | 1 TRAPPC9    |
| 1.26E-16   | 0.368573898 | 0.269 | 0.206 | 4.04E-12    | 1 MAP3K15    |
| 1.16E-13   | 0.366902599 | 0.531 | 0.52  | 3.71E-09    | 1 ADAM10     |
| 2.68E-14   | 0.366640755 | 0.512 | 0.478 | 8.60E-10    | 1 COL18A1    |
| 8.02E-06   | 0.363224013 | 0.384 | 0.38  | 0.257530719 | 1 CLCN3      |
| 1.17E-14   | 0.361061331 | 0.36  | 0.306 | 3.75E-10    | 1 ASXL3      |
| 9.69E-55   | 0.358434684 | 0.456 | 0.28  | 3.11E-50    | 1 TMEM52B    |
| 5.60E-19   | 0.356955953 | 0.623 | 0.586 | 1.80E-14    | 1 TRHDE      |
| 6.04E-06   | 0.356655252 | 0.459 | 0.472 | 0.194027814 | 1 GALNT11    |
| 1.91E-14   | 0.356646479 | 0.254 | 0.195 | 6.14E-10    | 1 GPR160     |
| 0.00620766 | 0.356292763 | 0.434 | 0.532 | 1           | 1 RANBP2     |
| 4.75E-16   | 0.355176567 | 0.573 | 0.573 | 1.53E-11    | 1 TLK1       |
| 1.92E-13   | 0.353229349 | 0.277 | 0.224 | 6.16E-09    | 1 CAP2       |
| 1.28E-24   | 0.351365984 | 0.373 | 0.273 | 4.10E-20    | 1 CACNB4     |
| 1.93E-06   | 0.350763012 | 0.286 | 0.265 | 0.062077138 | 1 COG7       |
| 2.76E-13   | 0.35065257  | 0.475 | 0.44  | 8.87E-09    | 1 CCDC171    |
| 1.90E-08   | 0.349923944 | 0.322 | 0.294 | 0.000609239 | 1 WDR91      |

|            |             |       |       |             |   |            |
|------------|-------------|-------|-------|-------------|---|------------|
| 2.14E-06   | 0.34770302  | 0.316 | 0.291 | 0.068668252 | 1 | AL050309.1 |
| 1.31E-07   | 0.346564565 | 0.319 | 0.288 | 0.004193667 | 1 | SEMA6A     |
| 3.25E-09   | 0.34568587  | 0.266 | 0.227 | 0.000104324 | 1 | SLC23A2    |
| 4.68E-05   | 0.344900892 | 0.383 | 0.379 | 1           | 1 | CDKL1      |
| 8.24E-26   | 0.344065723 | 0.751 | 0.726 | 2.65E-21    | 1 | DANT2      |
| 1.89E-20   | 0.342974112 | 0.673 | 0.658 | 6.06E-16    | 1 | MAP4       |
| 8.23E-10   | 0.338163268 | 0.485 | 0.467 | 2.64E-05    | 1 | RBBP8      |
| 6.48E-10   | 0.337704229 | 0.297 | 0.255 | 2.08E-05    | 1 | ADGRG1     |
| 0.00071465 | 0.337086901 | 0.291 | 0.279 | 1           | 1 | CD24       |
| 9.12E-07   | 0.337062074 | 0.345 | 0.328 | 0.029290825 | 1 | SNX2       |
| 0.00017426 | 0.33558639  | 0.347 | 0.349 | 1           | 1 | ACVR1B     |
| 2.79E-11   | 0.334825734 | 0.473 | 0.455 | 8.96E-07    | 1 | ZNF618     |
| 1.23E-15   | 0.334777195 | 0.671 | 0.675 | 3.95E-11    | 1 | AAK1       |
| 1.91E-08   | 0.333654329 | 0.782 | 0.824 | 0.000614459 | 1 | FP236383.3 |
| 8.25E-06   | 0.333605329 | 0.296 | 0.278 | 0.265111981 | 1 | ZNF483     |
| 4.62E-13   | 0.332933475 | 0.582 | 0.572 | 1.49E-08    | 1 | WWTR1      |
| 2.75E-17   | 0.332166854 | 0.542 | 0.478 | 8.84E-13    | 1 | GALNT18    |
| 3.57E-11   | 0.330573886 | 0.325 | 0.275 | 1.15E-06    | 1 | GPR39      |
| 3.03E-33   | 0.328102517 | 0.79  | 0.703 | 9.73E-29    | 1 | DLG2       |
| 1.44E-08   | 0.32734031  | 0.383 | 0.347 | 0.00046137  | 1 | SLC16A10   |
| 3.15E-15   | 0.326684519 | 0.533 | 0.502 | 1.01E-10    | 1 | PTPN3      |
| 2.06E-06   | 0.326252945 | 0.256 | 0.225 | 0.066096696 | 1 | ZC4H2      |
| 1.56E-10   | 0.324917721 | 0.356 | 0.312 | 5.00E-06    | 1 | SLC22A15   |
| 2.02E-10   | 0.322532712 | 0.344 | 0.304 | 6.49E-06    | 1 | CHPT1      |
| 5.51E-08   | 0.320842775 | 0.307 | 0.28  | 0.001770187 | 1 | SMAD1      |
| 8.96E-22   | 0.319549526 | 0.531 | 0.474 | 2.88E-17    | 1 | MOB1B      |
| 8.44E-05   | 0.318962186 | 0.366 | 0.36  | 1           | 1 | ZNF10      |
| 2.74E-18   | 0.31870451  | 0.313 | 0.241 | 8.79E-14    | 1 | CPVL       |
| 8.04E-08   | 0.317170892 | 0.326 | 0.297 | 0.002582813 | 1 | DPY19L2P2  |
| 9.40E-22   | 0.313942327 | 0.706 | 0.69  | 3.02E-17    | 1 | MTR        |
| 1.95E-05   | 0.312706125 | 0.255 | 0.233 | 0.625219473 | 1 | RAB17      |
| 1.77E-30   | 0.309434116 | 1     | 0.999 | 5.67E-26    | 1 | FP671120.7 |
| 1.72E-08   | 0.308680323 | 0.276 | 0.24  | 0.00055394  | 1 | NRSN2-AS1  |
| 3.98E-11   | 0.307239585 | 0.353 | 0.3   | 1.28E-06    | 1 | VAX2       |
| 9.81E-05   | 0.306701938 | 0.48  | 0.496 | 1           | 1 | SMARCA2    |
| 8.78E-05   | 0.303759335 | 0.313 | 0.295 | 1           | 1 | DEFB1      |
| 1.25E-25   | 0.303225655 | 0.8   | 0.762 | 4.03E-21    | 1 | PPP2R3A    |
| 2.94E-15   | 0.303184142 | 0.568 | 0.539 | 9.45E-11    | 1 | PPFIBP1    |
| 1.44E-38   | 0.30292182  | 0.823 | 0.802 | 4.64E-34    | 1 | MED13L     |
| 2.87E-06   | 0.302127139 | 0.261 | 0.234 | 0.0920526   | 1 | DCUN1D5    |
| 0.00481566 | 0.302077555 | 0.366 | 0.374 | 1           | 1 | TBC1D32    |
| 2.09E-45   | 0.301159198 | 0.921 | 0.882 | 6.72E-41    | 1 | IMMP2L     |
| 0.00056001 | 0.301129374 | 0.324 | 0.318 | 1           | 1 | ERBB2      |
| 1.88E-05   | 0.301094958 | 0.438 | 0.44  | 0.604960504 | 1 | ZNF827     |
| 4.16E-11   | 0.300782694 | 0.612 | 0.595 | 1.34E-06    | 1 | DAB1       |
| 2.53E-08   | 0.30046485  | 0.263 | 0.226 | 0.000813108 | 1 | CBR3-AS1   |
| 2.74E-07   | 0.299656204 | 0.342 | 0.316 | 0.008807298 | 1 | ERMP1      |
| 7.18E-06   | 0.299181952 | 0.606 | 0.605 | 0.230455356 | 1 | IGFBP7     |
| 2.41E-06   | 0.29853504  | 0.33  | 0.295 | 0.077262833 | 1 | SLC9C1     |
| 2.42E-05   | 0.29594348  | 0.528 | 0.561 | 0.777368117 | 1 | SRSF5      |
| 1.43E-06   | 0.292641562 | 0.429 | 0.415 | 0.045826242 | 1 | NEK11      |

|            |             |       |       |             |               |
|------------|-------------|-------|-------|-------------|---------------|
| 0.00065759 | 0.292470879 | 0.271 | 0.256 | 1           | 1 YWHAEP7     |
| 3.02E-06   | 0.291748674 | 0.295 | 0.27  | 0.097038122 | 1 ARMCX5-GPRA |
| 4.61E-16   | 0.290889501 | 0.336 | 0.27  | 1.48E-11    | 1 NHSL1       |
| 5.17E-07   | 0.289719279 | 0.324 | 0.297 | 0.016590626 | 1 OBSCN       |
| 4.95E-66   | 0.288283794 | 0.714 | 0.56  | 1.59E-61    | 1 NEBL        |
| 1.76E-09   | 0.287542297 | 0.913 | 0.937 | 5.66E-05    | 1 MT-RNR1     |
| 2.60E-05   | 0.286963842 | 0.277 | 0.256 | 0.836431477 | 1 METTL9      |
| 1.79E-06   | 0.284375177 | 0.257 | 0.225 | 0.057393206 | 1 TPD52L1     |
| 4.89E-06   | 0.282467831 | 0.314 | 0.29  | 0.156949502 | 1 FAM117B     |
| 7.44E-30   | 0.281945883 | 0.411 | 0.297 | 2.39E-25    | 1 KLHL3       |
| 0.00272502 | 0.280615339 | 0.412 | 0.416 | 1           | 1 ZNF124      |
| 0.00136876 | 0.280018711 | 0.312 | 0.302 | 1           | 1 5-8S-rRNA   |
| 0.00291035 | 0.277976556 | 0.383 | 0.392 | 1           | 1 EFCAB2      |
| 2.50E-07   | 0.277229627 | 0.445 | 0.43  | 0.008013401 | 1 DTNB        |
| 1.99E-30   | 0.274600438 | 0.853 | 0.838 | 6.40E-26    | 1 SNX29       |
| 0.0016796  | 0.274416289 | 0.43  | 0.449 | 1           | 1 LCORL       |
| 0.00017587 | 0.273594307 | 0.288 | 0.271 | 1           | 1 RAPH1       |
| 1.65E-08   | 0.272318298 | 0.374 | 0.332 | 0.000528891 | 1 AC040174.1  |
| 5.35E-07   | 0.271816283 | 0.463 | 0.463 | 0.017172263 | 1 ACTR3C      |
| 2.04E-25   | 0.271017911 | 0.824 | 0.822 | 6.55E-21    | 1 ARID1B      |
| 0.00594214 | 0.2705313   | 0.285 | 0.284 | 1           | 1 ANKRD13A    |
| 3.98E-11   | 0.270328047 | 0.637 | 0.635 | 1.28E-06    | 1 SCMHI       |
| 0.00092876 | 0.269538248 | 0.372 | 0.365 | 1           | 1 LMCD1-AS1   |
| 7.18E-06   | 0.268125478 | 0.423 | 0.407 | 0.230564882 | 1 UBL3        |
| 0.0018664  | 0.267050311 | 0.267 | 0.256 | 1           | 1 B4GALT1     |
| 5.36E-08   | 0.265299132 | 0.516 | 0.492 | 0.00172161  | 1 MFHAS1      |
| 5.73E-05   | 0.264841418 | 0.348 | 0.332 | 1           | 1 CFAP221     |
| 0.00016345 | 0.264778784 | 0.3   | 0.282 | 1           | 1 CSRNP3      |
| 3.20E-11   | 0.263391884 | 0.584 | 0.575 | 1.03E-06    | 1 NLK         |
| 0.00078422 | 0.263178026 | 0.386 | 0.39  | 1           | 1 MINDY2      |
| 9.74E-07   | 0.262167273 | 0.544 | 0.555 | 0.031266948 | 1 RAB3IP      |
| 5.02E-06   | 0.2607591   | 0.409 | 0.398 | 0.161375475 | 1 HSPA12A     |
| 2.84E-12   | 0.260731407 | 0.616 | 0.595 | 9.11E-08    | 1 DYNC2H1     |
| 4.59E-05   | 0.258852831 | 0.275 | 0.245 | 1           | 1 BHLHE40     |
| 0.00010992 | 0.257833254 | 0.631 | 0.664 | 1           | 1 HCG17       |
| 0.00010257 | 0.256166853 | 0.431 | 0.436 | 1           | 1 SPATA6      |
| 1.37E-06   | 0.255299895 | 0.639 | 0.658 | 0.043970257 | 1 SH3RF1      |
| 3.07E-16   | 0.2520172   | 0.72  | 0.717 | 9.86E-12    | 1 ADK         |
| 0.00736189 | 0.251873059 | 0.448 | 0.473 | 1           | 1 CDC42BPB    |
| 0.00413428 | 0.251835615 | 0.288 | 0.282 | 1           | 1 KSR1        |
| 5.70E-16   | 0.251293115 | 0.571 | 0.533 | 1.83E-11    | 1 PLCXD2      |
| 0          | 2.807302184 | 0.942 | 0.2   | 0           | 2 SLC12A1     |
| 0          | 2.563615929 | 0.745 | 0.196 | 0           | 2 ENOX1       |
| 0          | 2.299412619 | 0.693 | 0.172 | 0           | 2 UMOD        |
| 0          | 2.208661386 | 0.922 | 0.313 | 0           | 2 PLCB1       |
| 0          | 2.175102759 | 0.861 | 0.248 | 0           | 2 CASR        |
| 3.09E-190  | 2.167234096 | 0.338 | 0.111 | 9.93E-186   | 2 PAPP2       |
| 5.89E-156  | 1.99222032  | 0.532 | 0.295 | 1.89E-151   | 2 COPG2       |
| 0          | 1.83800502  | 0.625 | 0.204 | 0           | 2 NPSR1-AS1   |
| 0          | 1.783659922 | 0.538 | 0.108 | 0           | 2 ACP3        |
| 0          | 1.758489833 | 0.775 | 0.324 | 0           | 2 LINC01606   |

|           |             |       |       |           |               |
|-----------|-------------|-------|-------|-----------|---------------|
| 0         | 1.71910057  | 0.537 | 0.102 | 0         | 2 GP2         |
| 8.23E-262 | 1.662996349 | 0.751 | 0.442 | 2.64E-257 | 2 GPC5        |
| 0         | 1.640414228 | 0.609 | 0.231 | 0         | 2 RANBP3L     |
| 0         | 1.633182383 | 0.99  | 0.748 | 0         | 2 ERBB4       |
| 1.05E-211 | 1.608268534 | 0.565 | 0.277 | 3.37E-207 | 2 PHACTR1     |
| 2.42E-168 | 1.60559798  | 0.393 | 0.152 | 7.77E-164 | 2 AC092078.2  |
| 0         | 1.589262288 | 0.858 | 0.596 | 0         | 2 PRKD1       |
| 1.77E-52  | 1.568023327 | 0.419 | 0.279 | 5.68E-48  | 2 BBOX1       |
| 0         | 1.558734249 | 0.821 | 0.474 | 0         | 2 HIP1        |
| 0         | 1.545241793 | 0.873 | 0.347 | 0         | 2 CACNA2D3    |
| 5.21E-251 | 1.508027111 | 0.707 | 0.419 | 1.67E-246 | 2 DEPTOR      |
| 0         | 1.481470694 | 0.801 | 0.435 | 0         | 2 KLHL13      |
| 0         | 1.471711942 | 0.448 | 0.11  | 0         | 2 SCHLAP1     |
| 0         | 1.461117761 | 0.512 | 0.094 | 0         | 2 SIM2        |
| 1.05E-300 | 1.389447312 | 0.82  | 0.557 | 3.39E-296 | 2 CLCN5       |
| 1.49E-264 | 1.385993655 | 0.892 | 0.595 | 4.78E-260 | 2 KCNIP4      |
| 0         | 1.372620433 | 0.681 | 0.287 | 0         | 2 RBFOX1      |
| 0         | 1.353419499 | 0.589 | 0.186 | 0         | 2 RP1         |
| 4.01E-184 | 1.348918816 | 0.629 | 0.363 | 1.29E-179 | 2 CLDN10      |
| 7.10E-113 | 1.347592047 | 0.452 | 0.247 | 2.28E-108 | 2 ITGB6       |
| 0         | 1.34699039  | 0.99  | 0.775 | 0         | 2 CCSER1      |
| 5.19E-258 | 1.302942889 | 0.418 | 0.133 | 1.67E-253 | 2 AC024022.1  |
| 9.52E-237 | 1.264646389 | 0.515 | 0.209 | 3.06E-232 | 2 SUSD4       |
| 2.46E-251 | 1.260050841 | 0.713 | 0.355 | 7.90E-247 | 2 PCDH9       |
| 5.08E-203 | 1.237493451 | 0.658 | 0.373 | 1.63E-198 | 2 INPP4B      |
| 0         | 1.214920563 | 0.382 | 0.077 | 0         | 2 CLDN16      |
| 7.89E-191 | 1.214489653 | 0.451 | 0.186 | 2.53E-186 | 2 PPFIA2      |
| 1.91E-177 | 1.198412574 | 0.506 | 0.234 | 6.13E-173 | 2 LINC01182   |
| 8.25E-272 | 1.180965223 | 0.438 | 0.138 | 2.65E-267 | 2 TFAP2B      |
| 7.24E-223 | 1.178037696 | 0.592 | 0.286 | 2.33E-218 | 2 UGT8        |
| 1.26E-250 | 1.166376694 | 0.693 | 0.313 | 4.05E-246 | 2 LINC01762   |
| 3.47E-185 | 1.160553987 | 0.582 | 0.303 | 1.11E-180 | 2 UPP2        |
| 7.47E-218 | 1.144336138 | 0.585 | 0.257 | 2.40E-213 | 2 CA10        |
| 1.52E-210 | 1.121924974 | 0.734 | 0.471 | 4.87E-206 | 2 CCDC148     |
| 1.06E-207 | 1.104793501 | 0.528 | 0.235 | 3.39E-203 | 2 MGLL        |
| 1.26E-179 | 1.097587464 | 0.821 | 0.615 | 4.05E-175 | 2 ATP1A1      |
| 2.42E-237 | 1.082753127 | 0.808 | 0.46  | 7.78E-233 | 2 PDE1A       |
| 5.68E-203 | 1.069884403 | 0.701 | 0.402 | 1.82E-198 | 2 STK32B      |
| 2.67E-173 | 1.055550741 | 0.615 | 0.366 | 8.58E-169 | 2 EFHD1       |
| 1.92E-209 | 1.046679742 | 0.57  | 0.249 | 6.17E-205 | 2 ESRRB       |
| 3.53E-173 | 1.040196304 | 0.38  | 0.132 | 1.13E-168 | 2 CALCR       |
| 7.35E-123 | 1.025856818 | 0.643 | 0.424 | 2.36E-118 | 2 THSD4       |
| 3.43E-182 | 1.025805283 | 0.572 | 0.267 | 1.10E-177 | 2 SGIP1       |
| 6.00E-147 | 1.014535705 | 0.663 | 0.444 | 1.93E-142 | 2 KCTD1       |
| 4.08E-167 | 1.011070135 | 0.502 | 0.22  | 1.31E-162 | 2 HS6ST2      |
| 1.58E-177 | 0.993928498 | 0.869 | 0.709 | 5.07E-173 | 2 CGNL1       |
| 3.13E-159 | 0.993074943 | 0.437 | 0.194 | 1.01E-154 | 2 AL713999.2  |
| 3.59E-119 | 0.993014563 | 0.334 | 0.141 | 1.15E-114 | 2 NOS1        |
| 2.81E-213 | 0.990184348 | 0.393 | 0.13  | 9.03E-209 | 2 FXYD6-FXYD2 |
| 3.85E-192 | 0.987708367 | 0.258 | 0.066 | 1.23E-187 | 2 IFITM10     |
| 1.30E-136 | 0.965686328 | 0.698 | 0.495 | 4.18E-132 | 2 FXYD2       |



|           |             |       |       |             |              |
|-----------|-------------|-------|-------|-------------|--------------|
| 2.86E-115 | 0.957703145 | 0.532 | 0.307 | 9.18E-111   | 2 CCDC178    |
| 4.05E-227 | 0.953265282 | 0.917 | 0.774 | 1.30E-222   | 2 PKP4       |
| 3.58E-88  | 0.949244513 | 0.418 | 0.247 | 1.15E-83    | 2 ITPRID2    |
| 2.68E-118 | 0.929889419 | 0.647 | 0.419 | 8.59E-114   | 2 CLCNKB     |
| 7.03E-111 | 0.922833616 | 0.558 | 0.357 | 2.26E-106   | 2 TMEM72-AS1 |
| 2.51E-154 | 0.918055525 | 0.382 | 0.15  | 8.05E-150   | 2 DENND2A    |
| 7.57E-114 | 0.915729957 | 0.392 | 0.187 | 2.43E-109   | 2 AQP4-AS1   |
| 1.01E-156 | 0.907150246 | 0.283 | 0.088 | 3.24E-152   | 2 PPM1E      |
| 4.06E-136 | 0.893871244 | 0.427 | 0.197 | 1.30E-131   | 2 WNK4       |
| 1.20E-17  | 0.891918523 | 0.313 | 0.235 | 3.85E-13    | 2 KCNMB2     |
| 3.41E-133 | 0.874311647 | 0.425 | 0.194 | 1.10E-128   | 2 NRK        |
| 3.14E-121 | 0.861515648 | 0.421 | 0.211 | 1.01E-116   | 2 TPTEP1     |
| 3.37E-57  | 0.859011585 | 0.33  | 0.197 | 1.08E-52    | 2 CKB        |
| 1.58E-125 | 0.858583717 | 0.269 | 0.093 | 5.07E-121   | 2 CNTN1      |
| 7.19E-54  | 0.841200491 | 0.546 | 0.407 | 2.31E-49    | 2 ACSL4      |
| 9.77E-89  | 0.840074882 | 0.435 | 0.252 | 3.14E-84    | 2 SCD5       |
| 7.08E-82  | 0.820018166 | 0.489 | 0.32  | 2.27E-77    | 2 CREB3L2    |
| 9.44E-154 | 0.819212272 | 0.782 | 0.504 | 3.03E-149   | 2 PTH1R      |
| 1.70E-59  | 0.816199691 | 0.508 | 0.37  | 5.46E-55    | 2 LRRK2      |
| 2.59E-112 | 0.815971936 | 0.46  | 0.239 | 8.31E-108   | 2 CHL1       |
| 5.30E-97  | 0.810120136 | 0.323 | 0.145 | 1.70E-92    | 2 HDAC9      |
| 1.36E-113 | 0.80998347  | 0.47  | 0.238 | 4.36E-109   | 2 AC068631.1 |
| 4.18E-133 | 0.806105611 | 0.778 | 0.589 | 1.34E-128   | 2 AC012409.2 |
| 2.80E-98  | 0.782677144 | 0.479 | 0.28  | 9.01E-94    | 2 CCND3      |
| 1.50E-47  | 0.779813559 | 0.277 | 0.156 | 4.81E-43    | 2 LINC01091  |
| 1.33E-31  | 0.778305593 | 0.282 | 0.182 | 4.26E-27    | 2 HMCN1      |
| 8.59E-128 | 0.767510066 | 0.432 | 0.204 | 2.76E-123   | 2 RIMBP2     |
| 3.23E-76  | 0.755158269 | 0.253 | 0.112 | 1.04E-71    | 2 SLC22A3    |
| 3.51E-64  | 0.752765051 | 0.266 | 0.131 | 1.13E-59    | 2 TCIM       |
| 6.61E-102 | 0.748979149 | 0.602 | 0.377 | 2.12E-97    | 2 MYO3B      |
| 6.53E-75  | 0.745612418 | 0.349 | 0.191 | 2.10E-70    | 2 TMEM72     |
| 3.74E-100 | 0.745142658 | 0.66  | 0.479 | 1.20E-95    | 2 HOXB3      |
| 6.80E-85  | 0.745062083 | 0.405 | 0.228 | 2.18E-80    | 2 DZIP1      |
| 7.35E-87  | 0.744858308 | 0.409 | 0.228 | 2.36E-82    | 2 ADGRV1     |
| 4.48E-89  | 0.741713657 | 0.721 | 0.577 | 1.44E-84    | 2 CPEB3      |
| 6.52E-103 | 0.741230748 | 0.478 | 0.261 | 2.09E-98    | 2 SEMA6D     |
| 1.03E-52  | 0.738703635 | 0.497 | 0.349 | 3.32E-48    | 2 LINC00970  |
| 2.33E-75  | 0.738582912 | 0.356 | 0.191 | 7.50E-71    | 2 KNG1       |
| 1.70E-69  | 0.737204458 | 0.557 | 0.403 | 5.45E-65    | 2 ARHGEF38   |
| 4.48E-24  | 0.734931786 | 0.266 | 0.18  | 1.44E-19    | 2 ROBO2      |
| 5.42E-75  | 0.727240943 | 0.484 | 0.32  | 1.74E-70    | 2 CFAP221    |
| 6.82E-59  | 0.724799996 | 0.407 | 0.25  | 2.19E-54    | 2 MSR1       |
| 2.10E-80  | 0.723947987 | 0.679 | 0.5   | 6.73E-76    | 2 NAV2       |
| 6.65E-90  | 0.721901922 | 0.658 | 0.469 | 2.14E-85    | 2 GALNT18    |
| 2.98E-73  | 0.717231842 | 0.377 | 0.208 | 9.57E-69    | 2 SLCO3A1    |
| 2.16E-68  | 0.71629887  | 0.653 | 0.541 | 6.94E-64    | 2 DAPK1      |
| 1.41E-137 | 0.714604513 | 0.903 | 0.734 | 4.53E-133   | 2 ARHGAP6    |
| 2.16E-50  | 0.714194424 | 0.536 | 0.397 | 6.95E-46    | 2 CLCNKA     |
| 1.01E-07  | 0.705818574 | 0.277 | 0.239 | 0.003253302 | 2 LINGO2     |
| 1.07E-138 | 0.703702978 | 0.338 | 0.123 | 3.43E-134   | 2 NTRK2      |
| 7.60E-129 | 0.700017087 | 0.869 | 0.703 | 2.44E-124   | 2 ATP1B1     |

|           |             |       |       |           |               |
|-----------|-------------|-------|-------|-----------|---------------|
| 9.69E-109 | 0.699555425 | 0.744 | 0.558 | 3.11E-104 | 2 TBC1D4      |
| 1.06E-86  | 0.696429482 | 0.266 | 0.111 | 3.40E-82  | 2 SFRP1       |
| 3.34E-118 | 0.694328177 | 0.789 | 0.536 | 1.07E-113 | 2 EFNA5       |
| 1.17E-103 | 0.685934603 | 0.627 | 0.375 | 3.76E-99  | 2 FGF13       |
| 5.99E-100 | 0.684117953 | 0.785 | 0.67  | 1.92E-95  | 2 ARHGAP24    |
| 7.38E-46  | 0.680131147 | 0.283 | 0.164 | 2.37E-41  | 2 SHISA9      |
| 8.85E-77  | 0.67994777  | 0.286 | 0.133 | 2.84E-72  | 2 BRINP3      |
| 8.06E-81  | 0.678551749 | 0.354 | 0.188 | 2.59E-76  | 2 FAM184A     |
| 7.25E-36  | 0.672511878 | 0.509 | 0.412 | 2.33E-31  | 2 LHFPL3      |
| 2.04E-62  | 0.671828897 | 0.365 | 0.21  | 6.54E-58  | 2 GNAI1       |
| 6.85E-85  | 0.669903331 | 0.287 | 0.129 | 2.20E-80  | 2 GPR132      |
| 8.39E-49  | 0.669863598 | 0.496 | 0.368 | 2.69E-44  | 2 MAMDC2      |
| 2.32E-105 | 0.66803832  | 0.801 | 0.675 | 7.46E-101 | 2 ABLIM1      |
| 1.20E-69  | 0.667960496 | 0.624 | 0.483 | 3.86E-65  | 2 MFHAS1      |
| 1.09E-76  | 0.66528157  | 0.643 | 0.493 | 3.49E-72  | 2 TRIM2       |
| 4.76E-86  | 0.66522652  | 0.258 | 0.109 | 1.53E-81  | 2 ADAP1       |
| 9.18E-60  | 0.664933645 | 0.363 | 0.216 | 2.95E-55  | 2 AL139383.1  |
| 2.31E-129 | 0.660742025 | 0.66  | 0.385 | 7.41E-125 | 2 EGF         |
| 2.35E-111 | 0.655845058 | 0.31  | 0.125 | 7.56E-107 | 2 GUCY1A1     |
| 4.90E-55  | 0.650772041 | 0.538 | 0.404 | 1.57E-50  | 2 MIR4435-2HG |
| 2.65E-101 | 0.649119099 | 0.696 | 0.495 | 8.50E-97  | 2 SKAP1       |
| 3.77E-77  | 0.648171903 | 0.709 | 0.549 | 1.21E-72  | 2 COL4A3      |
| 1.84E-35  | 0.648011525 | 0.414 | 0.313 | 5.91E-31  | 2 DNASE1      |
| 2.62E-49  | 0.646175022 | 0.625 | 0.534 | 8.42E-45  | 2 SVIL        |
| 8.79E-42  | 0.643116851 | 0.353 | 0.235 | 2.82E-37  | 2 COL6A1      |
| 1.75E-35  | 0.639565891 | 0.384 | 0.282 | 5.63E-31  | 2 SLC25A33    |
| 6.80E-65  | 0.635472283 | 0.32  | 0.172 | 2.19E-60  | 2 AGPAT4      |
| 1.93E-42  | 0.628123411 | 0.553 | 0.467 | 6.19E-38  | 2 EPB41L1     |
| 2.93E-33  | 0.626728602 | 0.384 | 0.291 | 9.42E-29  | 2 ATP6V0E1    |
| 4.46E-60  | 0.62648407  | 0.264 | 0.133 | 1.43E-55  | 2 SLC16A5     |
| 3.15E-54  | 0.621630428 | 0.385 | 0.244 | 1.01E-49  | 2 AC018730.1  |
| 1.24E-38  | 0.620021381 | 0.398 | 0.268 | 3.99E-34  | 2 LINC02343   |
| 2.74E-84  | 0.620015049 | 0.75  | 0.625 | 8.81E-80  | 2 CLMN        |
| 2.39E-40  | 0.614186885 | 0.397 | 0.279 | 7.69E-36  | 2 LMF1        |
| 1.16E-63  | 0.611190985 | 0.677 | 0.54  | 3.72E-59  | 2 PRICKLE2    |
| 1.53E-41  | 0.611017204 | 0.531 | 0.443 | 4.92E-37  | 2 LRRC37A4P   |
| 1.12E-66  | 0.609967279 | 0.653 | 0.509 | 3.61E-62  | 2 AL137782.1  |
| 5.16E-51  | 0.609913208 | 0.304 | 0.171 | 1.66E-46  | 2 AC011586.1  |
| 4.07E-41  | 0.608956726 | 0.681 | 0.62  | 1.31E-36  | 2 AC058822.1  |
| 3.47E-13  | 0.603049701 | 0.271 | 0.217 | 1.11E-08  | 2 NLGN4Y      |
| 1.90E-46  | 0.595347405 | 0.402 | 0.266 | 6.12E-42  | 2 SCTR        |
| 1.27E-57  | 0.59268177  | 0.567 | 0.422 | 4.07E-53  | 2 SCNN1A      |
| 1.48E-54  | 0.590753287 | 0.641 | 0.514 | 4.75E-50  | 2 HNF1A-AS1   |
| 1.30E-64  | 0.589809616 | 0.612 | 0.449 | 4.18E-60  | 2 STK39       |
| 2.25E-55  | 0.585406263 | 0.648 | 0.53  | 7.22E-51  | 2 AK3         |
| 5.91E-53  | 0.583672445 | 0.281 | 0.153 | 1.90E-48  | 2 PAPSS2      |
| 7.70E-45  | 0.583545659 | 0.349 | 0.222 | 2.47E-40  | 2 KCNJ1       |
| 5.02E-65  | 0.57975404  | 0.729 | 0.612 | 1.61E-60  | 2 DNAH14      |
| 1.01E-50  | 0.578814567 | 0.41  | 0.275 | 3.24E-46  | 2 MTURN       |
| 3.24E-130 | 0.571312624 | 0.978 | 0.874 | 1.04E-125 | 2 ESRRG       |
| 7.68E-68  | 0.571168871 | 0.667 | 0.494 | 2.47E-63  | 2 LRP1B       |

|           |             |       |       |           |               |
|-----------|-------------|-------|-------|-----------|---------------|
| 1.87E-35  | 0.570861731 | 0.578 | 0.494 | 6.01E-31  | 2 ZMAT1       |
| 2.69E-63  | 0.564225557 | 0.648 | 0.502 | 8.65E-59  | 2 IVNS1ABP    |
| 2.94E-50  | 0.563853912 | 0.314 | 0.182 | 9.45E-46  | 2 PRKX        |
| 3.00E-43  | 0.560343933 | 0.419 | 0.291 | 9.65E-39  | 2 PLEKHH2     |
| 5.70E-38  | 0.559039552 | 0.407 | 0.294 | 1.83E-33  | 2 MAILR       |
| 3.87E-37  | 0.558240992 | 0.405 | 0.288 | 1.24E-32  | 2 MAL         |
| 3.40E-26  | 0.555552966 | 0.41  | 0.33  | 1.09E-21  | 2 NMD3        |
| 1.02E-40  | 0.553903843 | 0.573 | 0.463 | 3.29E-36  | 2 LINC01725   |
| 4.68E-43  | 0.549960236 | 0.6   | 0.51  | 1.50E-38  | 2 LLGL2       |
| 1.18E-48  | 0.545943561 | 0.656 | 0.593 | 3.78E-44  | 2 WWC2        |
| 1.79E-41  | 0.544576514 | 0.271 | 0.158 | 5.76E-37  | 2 STK32A      |
| 2.50E-42  | 0.543872288 | 0.336 | 0.214 | 8.04E-38  | 2 SPAG17      |
| 3.23E-91  | 0.543480948 | 0.885 | 0.778 | 1.04E-86  | 2 NAALADL2    |
| 2.39E-41  | 0.542525939 | 0.591 | 0.512 | 7.67E-37  | 2 TAOK3       |
| 1.01E-67  | 0.541859972 | 0.697 | 0.563 | 3.23E-63  | 2 USP53       |
| 5.60E-75  | 0.539762086 | 0.262 | 0.118 | 1.80E-70  | 2 USP13       |
| 7.05E-24  | 0.538624231 | 0.25  | 0.168 | 2.26E-19  | 2 AP1S3       |
| 4.85E-29  | 0.538181285 | 0.334 | 0.241 | 1.56E-24  | 2 MERTK       |
| 3.33E-28  | 0.537999807 | 0.379 | 0.285 | 1.07E-23  | 2 LINC00476   |
| 9.64E-37  | 0.53799421  | 0.434 | 0.316 | 3.09E-32  | 2 ATP11A      |
| 5.12E-11  | 0.536285458 | 0.304 | 0.247 | 1.65E-06  | 2 AC012593.1  |
| 6.63E-41  | 0.534720875 | 0.491 | 0.372 | 2.13E-36  | 2 CDH16       |
| 1.83E-26  | 0.531765127 | 0.413 | 0.316 | 5.88E-22  | 2 AC104123.1  |
| 6.48E-30  | 0.52791063  | 0.367 | 0.268 | 2.08E-25  | 2 MALRD1      |
| 2.46E-73  | 0.527520744 | 0.834 | 0.779 | 7.90E-69  | 2 MYO9A       |
| 1.86E-21  | 0.526647981 | 0.401 | 0.312 | 5.97E-17  | 2 GNGT1       |
| 7.70E-38  | 0.52587582  | 0.3   | 0.189 | 2.47E-33  | 2 CIT         |
| 7.56E-40  | 0.523853861 | 0.464 | 0.348 | 2.43E-35  | 2 RAP1GAP2    |
| 9.87E-67  | 0.522951707 | 0.558 | 0.383 | 3.17E-62  | 2 DNM3        |
| 3.67E-28  | 0.52266988  | 0.433 | 0.342 | 1.18E-23  | 2 GPI         |
| 8.36E-31  | 0.518769975 | 0.258 | 0.161 | 2.68E-26  | 2 U91319.1    |
| 1.50E-22  | 0.515684413 | 0.418 | 0.345 | 4.82E-18  | 2 IL3RA       |
| 1.95E-64  | 0.514392876 | 0.739 | 0.606 | 6.25E-60  | 2 MRPS6       |
| 8.91E-36  | 0.513137027 | 0.512 | 0.41  | 2.86E-31  | 2 DNAH7       |
| 4.34E-41  | 0.512803311 | 0.282 | 0.169 | 1.40E-36  | 2 RASSF7      |
| 9.17E-30  | 0.50855315  | 0.321 | 0.223 | 2.95E-25  | 2 RNF24       |
| 1.23E-34  | 0.505867738 | 0.262 | 0.157 | 3.96E-30  | 2 BDKRB2      |
| 1.19E-21  | 0.502306779 | 0.27  | 0.192 | 3.82E-17  | 2 PRANCR      |
| 5.64E-83  | 0.502112936 | 0.845 | 0.659 | 1.81E-78  | 2 NHS         |
| 4.58E-97  | 0.498865224 | 0.895 | 0.702 | 1.47E-92  | 2 ADAMTS9-AS2 |
| 1.32E-113 | 0.497480016 | 0.703 | 0.406 | 4.25E-109 | 2 SLC16A12    |
| 3.65E-45  | 0.494729818 | 0.267 | 0.152 | 1.17E-40  | 2 CCDC148-AS1 |
| 6.07E-30  | 0.493851591 | 0.397 | 0.298 | 1.95E-25  | 2 SLC39A10    |
| 7.70E-26  | 0.493370889 | 0.458 | 0.362 | 2.47E-21  | 2 DGKH        |
| 3.39E-22  | 0.4918175   | 0.516 | 0.46  | 1.09E-17  | 2 ZFAND5      |
| 9.84E-31  | 0.489302107 | 0.405 | 0.296 | 3.16E-26  | 2 VAX2        |
| 4.57E-32  | 0.48774653  | 0.659 | 0.601 | 1.47E-27  | 2 CIRBP       |
| 0.0002922 | 0.486278375 | 0.434 | 0.425 | 1         | 2 PDK4        |
| 1.18E-29  | 0.485149026 | 0.408 | 0.309 | 3.79E-25  | 2 MYOF        |
| 5.32E-20  | 0.483236108 | 0.418 | 0.339 | 1.71E-15  | 2 GLCC1       |
| 1.52E-24  | 0.480805834 | 0.29  | 0.202 | 4.87E-20  | 2 AP000317.2  |

|          |             |       |       |          |              |
|----------|-------------|-------|-------|----------|--------------|
| 2.67E-21 | 0.479863419 | 0.293 | 0.215 | 8.58E-17 | 2 BCL7C      |
| 9.12E-23 | 0.479747277 | 0.296 | 0.215 | 2.93E-18 | 2 AL132780.1 |
| 7.51E-29 | 0.478780553 | 0.413 | 0.315 | 2.41E-24 | 2 AMMECR1    |
| 2.05E-38 | 0.476918188 | 0.382 | 0.261 | 6.57E-34 | 2 PANTR1     |
| 4.07E-41 | 0.47528335  | 0.575 | 0.44  | 1.31E-36 | 2 RNF150     |
| 2.14E-24 | 0.474338075 | 0.393 | 0.304 | 6.89E-20 | 2 MST1L      |
| 5.94E-31 | 0.474048188 | 0.59  | 0.525 | 1.91E-26 | 2 PTPN14     |
| 1.58E-14 | 0.473466867 | 0.5   | 0.45  | 5.08E-10 | 2 PPM1L      |
| 2.47E-29 | 0.472695564 | 0.332 | 0.231 | 7.94E-25 | 2 COL28A1    |
| 1.62E-35 | 0.466500366 | 0.314 | 0.201 | 5.20E-31 | 2 PRKCQ      |
| 3.57E-22 | 0.465823679 | 0.483 | 0.418 | 1.15E-17 | 2 TCAIM      |
| 8.51E-22 | 0.461479181 | 0.484 | 0.425 | 2.73E-17 | 2 FBXL4      |
| 2.87E-25 | 0.459806778 | 0.401 | 0.309 | 9.21E-21 | 2 SLC22A15   |
| 2.48E-20 | 0.458023196 | 0.434 | 0.366 | 7.95E-16 | 2 CFAP70     |
| 8.17E-26 | 0.45798065  | 0.338 | 0.245 | 2.62E-21 | 2 MYLK       |
| 6.34E-16 | 0.457474135 | 0.265 | 0.201 | 2.04E-11 | 2 USP2       |
| 2.92E-23 | 0.454689761 | 0.262 | 0.183 | 9.38E-19 | 2 F11        |
| 1.97E-27 | 0.454179246 | 0.398 | 0.301 | 6.33E-23 | 2 CYS1       |
| 4.22E-34 | 0.454073129 | 0.282 | 0.178 | 1.35E-29 | 2 AC011447.3 |
| 8.09E-32 | 0.451362572 | 0.293 | 0.191 | 2.60E-27 | 2 SLC15A2    |
| 1.04E-18 | 0.451314286 | 0.483 | 0.418 | 3.34E-14 | 2 TMEM232    |
| 8.55E-40 | 0.448770172 | 0.581 | 0.463 | 2.75E-35 | 2 SSBP2      |
| 4.68E-18 | 0.447839075 | 0.278 | 0.205 | 1.50E-13 | 2 AC104596.1 |
| 2.07E-21 | 0.44670713  | 0.447 | 0.374 | 6.63E-17 | 2 PLXNB1     |
| 1.07E-28 | 0.445971066 | 0.579 | 0.489 | 3.43E-24 | 2 COL4A4     |
| 2.84E-28 | 0.444369597 | 0.623 | 0.551 | 9.12E-24 | 2 TPST1      |
| 3.51E-31 | 0.443611393 | 0.545 | 0.435 | 1.13E-26 | 2 PRDM16     |
| 9.31E-19 | 0.443103246 | 0.489 | 0.436 | 2.99E-14 | 2 GOLGA8A    |
| 2.51E-19 | 0.441357861 | 0.532 | 0.496 | 8.07E-15 | 2 ETNK1      |
| 3.44E-30 | 0.439203855 | 0.64  | 0.546 | 1.10E-25 | 2 CYFIP2     |
| 1.16E-17 | 0.436825949 | 0.346 | 0.281 | 3.72E-13 | 2 AC133644.2 |
| 4.85E-14 | 0.436576929 | 0.32  | 0.259 | 1.56E-09 | 2 DOCK3      |
| 5.17E-26 | 0.43602419  | 0.664 | 0.614 | 1.66E-21 | 2 DPH6       |
| 2.84E-13 | 0.43524751  | 0.359 | 0.297 | 9.13E-09 | 2 RAPGEF3    |
| 2.07E-56 | 0.434950428 | 0.783 | 0.675 | 6.64E-52 | 2 TFCP2L1    |
| 1.12E-13 | 0.434427686 | 0.467 | 0.443 | 3.59E-09 | 2 MYH10      |
| 4.86E-22 | 0.432785232 | 0.511 | 0.438 | 1.56E-17 | 2 RGL3       |
| 2.43E-32 | 0.431364576 | 0.723 | 0.659 | 7.80E-28 | 2 LGR4       |
| 8.59E-22 | 0.431208043 | 0.439 | 0.362 | 2.76E-17 | 2 CAPN2      |
| 2.68E-15 | 0.430871477 | 0.314 | 0.252 | 8.61E-11 | 2 YWHAEP7    |
| 1.25E-24 | 0.430782204 | 0.324 | 0.23  | 4.01E-20 | 2 SLC2A13    |
| 1.48E-15 | 0.430329411 | 0.344 | 0.282 | 4.75E-11 | 2 FAM227B    |
| 4.70E-12 | 0.42795487  | 0.273 | 0.218 | 1.51E-07 | 2 SLC22A2    |
| 4.76E-23 | 0.422526651 | 0.826 | 0.82  | 1.53E-18 | 2 FP236383.3 |
| 7.90E-19 | 0.422298997 | 0.439 | 0.356 | 2.54E-14 | 2 NELL1      |
| 4.70E-87 | 0.421819272 | 0.777 | 0.593 | 1.51E-82 | 2 CA12       |
| 1.86E-29 | 0.419615008 | 0.393 | 0.289 | 5.97E-25 | 2 GALNT10    |
| 1.27E-28 | 0.419481249 | 0.585 | 0.504 | 4.08E-24 | 2 RALGPS1    |
| 3.96E-31 | 0.419455777 | 0.777 | 0.731 | 1.27E-26 | 2 LINGO1     |
| 2.46E-17 | 0.417964235 | 0.398 | 0.331 | 7.89E-13 | 2 CECR2      |
| 7.18E-51 | 0.416305302 | 0.836 | 0.673 | 2.31E-46 | 2 KAZN       |

|            |             |       |       |             |                |
|------------|-------------|-------|-------|-------------|----------------|
| 2.36E-17   | 0.41621461  | 0.46  | 0.403 | 7.58E-13    | 2 LINC00271    |
| 1.97E-09   | 0.414999831 | 0.37  | 0.333 | 6.33E-05    | 2 RPS6KA2      |
| 3.10E-22   | 0.411500897 | 0.509 | 0.437 | 9.95E-18    | 2 CCDC171      |
| 5.20E-16   | 0.411215116 | 0.381 | 0.316 | 1.67E-11    | 2 MBOAT2       |
| 5.39E-22   | 0.41045228  | 0.271 | 0.186 | 1.73E-17    | 2 PHF21B       |
| 8.30E-23   | 0.410168653 | 0.519 | 0.43  | 2.66E-18    | 2 BICDL1       |
| 1.85E-24   | 0.408322066 | 0.512 | 0.413 | 5.94E-20    | 2 SLC16A7      |
| 3.48E-25   | 0.407819613 | 0.54  | 0.464 | 1.12E-20    | 2 PRR5-ARHGAP8 |
| 3.79E-22   | 0.406847305 | 0.267 | 0.185 | 1.22E-17    | 2 ABHD17C      |
| 1.58E-19   | 0.404651014 | 0.359 | 0.282 | 5.07E-15    | 2 TRMT9B       |
| 2.66E-17   | 0.403591581 | 0.558 | 0.527 | 8.56E-13    | 2 GOLGA8B      |
| 1.23E-11   | 0.402660166 | 0.339 | 0.291 | 3.94E-07    | 2 PFKL         |
| 1.05E-17   | 0.402129747 | 0.298 | 0.23  | 3.38E-13    | 2 OVOL2        |
| 6.86E-13   | 0.402091941 | 0.263 | 0.207 | 2.20E-08    | 2 LIX1-AS1     |
| 4.65E-11   | 0.400767022 | 0.377 | 0.328 | 1.49E-06    | 2 ZNF98        |
| 1.63E-28   | 0.398624193 | 0.329 | 0.23  | 5.24E-24    | 2 AL137009.1   |
| 6.48E-15   | 0.398035666 | 0.465 | 0.42  | 2.08E-10    | 2 ERICH1       |
| 7.36E-21   | 0.395510045 | 0.548 | 0.48  | 2.36E-16    | 2 GNG12-AS1    |
| 2.20E-14   | 0.393624703 | 0.421 | 0.368 | 7.07E-10    | 2 TBC1D32      |
| 2.81E-09   | 0.392928734 | 0.468 | 0.444 | 9.01E-05    | 2 MPC1         |
| 2.38E-13   | 0.392925467 | 0.553 | 0.532 | 7.66E-09    | 2 KIF16B       |
| 1.23E-13   | 0.39254711  | 0.447 | 0.411 | 3.95E-09    | 2 LINC01138    |
| 1.02E-05   | 0.391205074 | 0.314 | 0.292 | 0.328593449 | 2 LDHB         |
| 1.53E-13   | 0.389936455 | 0.537 | 0.506 | 4.92E-09    | 2 MIR3936HG    |
| 2.09E-09   | 0.389618441 | 0.394 | 0.357 | 6.70E-05    | 2 SPTLC3       |
| 1.01E-20   | 0.38831674  | 0.439 | 0.357 | 3.25E-16    | 2 MOB3B        |
| 4.22E-11   | 0.388259117 | 0.324 | 0.277 | 1.36E-06    | 2 CRTCI        |
| 3.57E-31   | 0.386573976 | 0.547 | 0.41  | 1.15E-26    | 2 LINC01320    |
| 1.26E-38   | 0.386024958 | 0.488 | 0.361 | 4.05E-34    | 2 MGAT5        |
| 1.03E-14   | 0.385191989 | 0.306 | 0.243 | 3.31E-10    | 2 AC012531.3   |
| 4.97E-25   | 0.384205554 | 0.277 | 0.187 | 1.60E-20    | 2 NR2F1-AS1    |
| 8.27E-17   | 0.383495118 | 0.352 | 0.285 | 2.65E-12    | 2 GSAP         |
| 9.81E-18   | 0.382746436 | 0.557 | 0.518 | 3.15E-13    | 2 DNM2         |
| 1.43E-25   | 0.380320705 | 0.254 | 0.16  | 4.60E-21    | 2 AL136234.1   |
| 5.72E-26   | 0.377302075 | 0.299 | 0.201 | 1.84E-21    | 2 MAPK4        |
| 2.29E-22   | 0.375727709 | 0.684 | 0.659 | 7.34E-18    | 2 HCG17        |
| 3.69E-15   | 0.373453354 | 0.289 | 0.226 | 1.19E-10    | 2 MAMDC2-AS1   |
| 8.79E-31   | 0.372512506 | 0.468 | 0.373 | 2.82E-26    | 2 SEC14L1      |
| 2.28E-29   | 0.372462279 | 0.711 | 0.658 | 7.33E-25    | 2 SAMD12       |
| 1.65E-06   | 0.372406168 | 0.253 | 0.22  | 0.052995457 | 2 PPM1K        |
| 7.08E-18   | 0.371890531 | 0.395 | 0.325 | 2.27E-13    | 2 NR2F2-AS1    |
| 5.38E-28   | 0.370179116 | 0.772 | 0.724 | 1.73E-23    | 2 DANT2        |
| 2.04E-12   | 0.368710246 | 0.392 | 0.331 | 6.54E-08    | 2 AC040174.1   |
| 1.07E-10   | 0.367448528 | 0.386 | 0.336 | 3.44E-06    | 2 ZRANB2-AS2   |
| 4.66E-12   | 0.36626122  | 0.316 | 0.265 | 1.50E-07    | 2 MAP3K3       |
| 8.67E-13   | 0.364709148 | 0.462 | 0.421 | 2.78E-08    | 2 STXBP4       |
| 8.01E-11   | 0.364417392 | 0.471 | 0.437 | 2.57E-06    | 2 ALOX12P2     |
| 1.69E-10   | 0.364388151 | 0.274 | 0.225 | 5.42E-06    | 2 PRDM16-DT    |
| 2.04E-08   | 0.363517567 | 0.286 | 0.247 | 0.000653662 | 2 Z93930.2     |
| 0.00137292 | 0.361985219 | 0.286 | 0.276 | 1           | 2 FBXW8        |
| 1.60E-08   | 0.360932126 | 0.274 | 0.235 | 0.000513652 | 2 ACSS1        |

|            |             |       |       |             |   |             |
|------------|-------------|-------|-------|-------------|---|-------------|
| 1.23E-08   | 0.36013577  | 0.323 | 0.277 | 0.000393714 | 2 | NUDT4       |
| 4.53E-18   | 0.358712309 | 0.499 | 0.438 | 1.46E-13    | 2 | TSGA10      |
| 4.61E-11   | 0.358206657 | 0.383 | 0.339 | 1.48E-06    | 2 | TMEM260     |
| 1.85E-23   | 0.357446467 | 0.989 | 0.986 | 5.94E-19    | 2 | FP671120.4  |
| 1.09E-27   | 0.355979424 | 0.295 | 0.195 | 3.50E-23    | 2 | MAP2K6      |
| 7.27E-07   | 0.355440577 | 0.349 | 0.324 | 0.023339099 | 2 | RRBP1       |
| 1.26E-16   | 0.35333885  | 0.29  | 0.212 | 4.04E-12    | 2 | TENM4       |
| 2.19E-11   | 0.352153763 | 0.544 | 0.52  | 7.04E-07    | 2 | TAPT1-AS1   |
| 3.21E-13   | 0.350663715 | 0.381 | 0.324 | 1.03E-08    | 2 | PITPNM2     |
| 1.51E-10   | 0.349947991 | 0.287 | 0.238 | 4.85E-06    | 2 | TSC2        |
| 0.00799615 | 0.349943777 | 0.258 | 0.251 | 1           | 2 | CHP1        |
| 3.66E-11   | 0.349867893 | 0.28  | 0.227 | 1.18E-06    | 2 | FGF9        |
| 2.90E-10   | 0.349848198 | 0.438 | 0.403 | 9.31E-06    | 2 | OGDHL       |
| 1.41E-27   | 0.348676463 | 0.327 | 0.22  | 4.54E-23    | 2 | SLC4A7      |
| 5.25E-14   | 0.348273515 | 0.478 | 0.431 | 1.69E-09    | 2 | ATP2C1      |
| 3.94E-21   | 0.342275439 | 0.677 | 0.615 | 1.26E-16    | 2 | SULT1C2     |
| 1.88E-15   | 0.341929211 | 0.49  | 0.433 | 6.05E-11    | 2 | SRGAP3      |
| 3.60E-22   | 0.341383573 | 0.308 | 0.217 | 1.16E-17    | 2 | FGF14       |
| 1.67E-06   | 0.338559515 | 0.259 | 0.227 | 0.053540727 | 2 | RAP1GAP     |
| 1.54E-07   | 0.337712128 | 0.404 | 0.383 | 0.004960834 | 2 | SESTD1      |
| 3.20E-10   | 0.337607768 | 0.472 | 0.458 | 1.03E-05    | 2 | C2CD5       |
| 9.23E-06   | 0.334620652 | 0.396 | 0.381 | 0.296371179 | 2 | KATNAL2     |
| 2.06E-25   | 0.33356116  | 0.582 | 0.504 | 6.61E-21    | 2 | TANC2       |
| 2.71E-05   | 0.332890527 | 0.34  | 0.323 | 0.870188945 | 2 | CTIF        |
| 5.37E-16   | 0.332463544 | 0.516 | 0.462 | 1.73E-11    | 2 | KIF12       |
| 7.53E-32   | 0.332377553 | 0.259 | 0.154 | 2.42E-27    | 2 | KIRREL1     |
| 6.39E-15   | 0.331024867 | 0.648 | 0.632 | 2.05E-10    | 2 | TTC3        |
| 2.79E-14   | 0.328382319 | 0.548 | 0.523 | 8.96E-10    | 2 | ZNF83       |
| 1.69E-08   | 0.328320126 | 0.255 | 0.213 | 0.000544123 | 2 | HOXA3       |
| 5.53E-07   | 0.327065126 | 0.412 | 0.384 | 0.017765409 | 2 | RAP2C-AS1   |
| 5.86E-17   | 0.325753971 | 0.573 | 0.505 | 1.88E-12    | 2 | WDFY2       |
| 5.23E-14   | 0.3257316   | 0.274 | 0.211 | 1.68E-09    | 2 | C12orf40    |
| 1.63E-14   | 0.32474545  | 0.719 | 0.734 | 5.22E-10    | 2 | AKAP9       |
| 1.27E-12   | 0.324431332 | 0.502 | 0.468 | 4.07E-08    | 2 | CASK        |
| 5.97E-07   | 0.323723631 | 0.471 | 0.456 | 0.019174844 | 2 | LMO7        |
| 0.00828477 | 0.322355224 | 0.339 | 0.334 | 1           | 2 | RIMKLB      |
| 9.91E-20   | 0.321513496 | 0.339 | 0.255 | 3.18E-15    | 2 | BTBD11      |
| 1.21E-10   | 0.321166952 | 0.255 | 0.204 | 3.89E-06    | 2 | ARPC4-TTLL3 |
| 1.28E-07   | 0.319341934 | 0.363 | 0.331 | 0.004108434 | 2 | SMARCA4     |
| 9.08E-44   | 0.31876191  | 0.928 | 0.882 | 2.92E-39    | 2 | IMMP2L      |
| 2.57E-12   | 0.318064315 | 0.562 | 0.557 | 8.27E-08    | 2 | AC138409.2  |
| 1.43E-06   | 0.316918604 | 0.431 | 0.417 | 0.046038675 | 2 | LINC01362   |
| 4.85E-09   | 0.315409686 | 0.279 | 0.233 | 0.000155643 | 2 | STK17A      |
| 2.57E-11   | 0.314476037 | 0.489 | 0.454 | 8.26E-07    | 2 | ZNF618      |
| 1.61E-27   | 0.314279858 | 0.615 | 0.497 | 5.17E-23    | 2 | DSCAML1     |
| 4.37E-05   | 0.31313647  | 0.326 | 0.307 | 1           | 2 | COQ4        |
| 6.93E-09   | 0.312470887 | 0.389 | 0.359 | 0.000222656 | 2 | NAIP        |
| 1.26E-19   | 0.312434156 | 0.36  | 0.271 | 4.03E-15    | 2 | PFKP        |
| 2.08E-08   | 0.311519087 | 0.331 | 0.294 | 0.000668579 | 2 | GABPB2      |
| 3.88E-06   | 0.311300574 | 0.397 | 0.385 | 0.124625431 | 2 | AC073107.1  |
| 2.14E-07   | 0.311235129 | 0.327 | 0.298 | 0.006874772 | 2 | CREBRF      |

|            |             |       |       |             |              |
|------------|-------------|-------|-------|-------------|--------------|
| 4.78E-16   | 0.310118658 | 0.505 | 0.431 | 1.54E-11    | 2 GCNT2      |
| 1.67E-07   | 0.310018965 | 0.422 | 0.397 | 0.0053662   | 2 RNF10      |
| 4.26E-08   | 0.309262285 | 0.454 | 0.43  | 0.001369767 | 2 CPEB2      |
| 1.64E-08   | 0.309076354 | 0.463 | 0.441 | 0.00052513  | 2 UBE2E3     |
| 1.63E-10   | 0.309017733 | 0.287 | 0.238 | 5.22E-06    | 2 OCLN       |
| 6.60E-10   | 0.307765959 | 0.359 | 0.301 | 2.12E-05    | 2 ALCAM      |
| 7.37E-31   | 0.30639142  | 0.815 | 0.77  | 2.37E-26    | 2 FARP1      |
| 4.70E-05   | 0.306204125 | 0.348 | 0.33  | 1           | 2 METTL25    |
| 1.89E-29   | 0.305964647 | 0.998 | 0.998 | 6.06E-25    | 2 HFM1       |
| 1.31E-06   | 0.305483131 | 0.482 | 0.475 | 0.041958755 | 2 WWP2       |
| 3.57E-05   | 0.305239886 | 0.34  | 0.318 | 1           | 2 RPS6KA6    |
| 5.87E-05   | 0.305110958 | 0.408 | 0.398 | 1           | 2 BOD1L1     |
| 6.61E-10   | 0.304830426 | 0.491 | 0.461 | 2.12E-05    | 2 ZMIZ1      |
| 0.00095984 | 0.303988539 | 0.275 | 0.257 | 1           | 2 SPON2      |
| 2.42E-12   | 0.303409563 | 0.391 | 0.335 | 7.77E-08    | 2 ZNF532     |
| 1.18E-10   | 0.302857076 | 0.62  | 0.599 | 3.80E-06    | 2 PTPN4      |
| 8.52E-05   | 0.301685096 | 0.331 | 0.308 | 1           | 2 ATF7IP2    |
| 8.10E-25   | 0.301381802 | 0.356 | 0.257 | 2.60E-20    | 2 PLEKHG1    |
| 1.11E-07   | 0.299438995 | 0.311 | 0.272 | 0.003574899 | 2 VOPP1      |
| 2.79E-11   | 0.299236378 | 0.289 | 0.234 | 8.97E-07    | 2 DNAI4      |
| 6.95E-08   | 0.29845163  | 0.471 | 0.456 | 0.002232759 | 2 ZNF586     |
| 1.85E-05   | 0.297541576 | 0.288 | 0.261 | 0.594865384 | 2 MSH2       |
| 1.63E-32   | 0.29742578  | 0.917 | 0.824 | 5.24E-28    | 2 BICC1      |
| 6.93E-08   | 0.296589676 | 0.388 | 0.361 | 0.002224174 | 2 GUSBP17    |
| 7.38E-06   | 0.295810934 | 0.354 | 0.335 | 0.237173128 | 2 ASB3       |
| 5.77E-07   | 0.294385036 | 0.495 | 0.497 | 0.01852686  | 2 SIL1       |
| 2.46E-43   | 0.293718459 | 0.707 | 0.52  | 7.90E-39    | 2 OSBPL3     |
| 2.73E-13   | 0.2935926   | 0.615 | 0.573 | 8.78E-09    | 2 FAM160A1   |
| 3.54E-08   | 0.292580627 | 0.326 | 0.286 | 0.001137373 | 2 TMEM164    |
| 1.11E-05   | 0.292521837 | 0.297 | 0.268 | 0.35747451  | 2 JUP        |
| 3.13E-06   | 0.291708063 | 0.413 | 0.398 | 0.100469375 | 2 PCNX2      |
| 0.00096638 | 0.291672511 | 0.25  | 0.231 | 1           | 2 LNC-LBCS   |
| 1.61E-10   | 0.29153318  | 0.523 | 0.487 | 5.18E-06    | 2 CCDC30     |
| 4.54E-08   | 0.291272319 | 0.389 | 0.355 | 0.001457263 | 2 ITGB5      |
| 9.11E-18   | 0.291111704 | 0.744 | 0.713 | 2.92E-13    | 2 MACROD2    |
| 6.17E-09   | 0.290735704 | 0.46  | 0.438 | 0.000198113 | 2 DPY19L1P1  |
| 3.06E-31   | 0.290620537 | 0.793 | 0.67  | 9.84E-27    | 2 AC005208.1 |
| 1.36E-07   | 0.290596992 | 0.374 | 0.343 | 0.004382379 | 2 CCDC57     |
| 8.56E-13   | 0.290334198 | 0.424 | 0.362 | 2.75E-08    | 2 GRHL2      |
| 0.00014493 | 0.290293549 | 0.297 | 0.277 | 1           | 2 GUSBP3     |
| 1.09E-25   | 0.289828516 | 0.829 | 0.781 | 3.51E-21    | 2 FGD4       |
| 0.00072091 | 0.289766467 | 0.252 | 0.234 | 1           | 2 SCGB2B2    |
| 3.40E-06   | 0.289127091 | 0.413 | 0.395 | 0.109233552 | 2 GRAMD1C    |
| 5.75E-23   | 0.289082314 | 0.375 | 0.281 | 1.85E-18    | 2 PIP5K1B    |
| 6.17E-06   | 0.288888478 | 0.455 | 0.45  | 0.198305354 | 2 TFCEP2     |
| 2.07E-40   | 0.28886929  | 0.415 | 0.274 | 6.66E-36    | 2 ADAMTS17   |
| 1.90E-09   | 0.287286635 | 0.25  | 0.201 | 6.10E-05    | 2 GOLM1      |
| 1.35E-07   | 0.286890939 | 0.415 | 0.389 | 0.004323033 | 2 AL589935.1 |
| 1.33E-05   | 0.284531083 | 0.463 | 0.456 | 0.426398349 | 2 SRSF10     |
| 5.50E-08   | 0.283964875 | 0.283 | 0.24  | 0.001765098 | 2 PANK1      |
| 1.19E-05   | 0.283900284 | 0.384 | 0.368 | 0.382808293 | 2 BCL2L14    |

|            |             |       |       |             |                 |
|------------|-------------|-------|-------|-------------|-----------------|
| 7.08E-06   | 0.283325323 | 0.441 | 0.439 | 0.227516054 | 2 GUSBP16       |
| 1.81E-06   | 0.282797867 | 0.538 | 0.528 | 0.058258869 | 2 UBA6-AS1      |
| 4.21E-06   | 0.28265199  | 0.374 | 0.351 | 0.135288578 | 2 GABPB1-AS1    |
| 1.13E-06   | 0.281822155 | 0.343 | 0.314 | 0.036283809 | 2 MOK           |
| 3.27E-12   | 0.281185901 | 0.275 | 0.214 | 1.05E-07    | 2 TPST2         |
| 3.01E-05   | 0.280668047 | 0.371 | 0.347 | 0.965193542 | 2 DSE           |
| 1.02E-23   | 0.279031853 | 0.999 | 0.999 | 3.28E-19    | 2 FP671120.7    |
| 1.70E-05   | 0.278668373 | 0.468 | 0.465 | 0.546638371 | 2 GPATCH2L      |
| 3.58E-08   | 0.278091994 | 0.602 | 0.604 | 0.00115036  | 2 ZNF518A       |
| 0.00041006 | 0.277740656 | 0.29  | 0.271 | 1           | 2 GSTO2         |
| 0.00017218 | 0.277389928 | 0.258 | 0.236 | 1           | 2 PXN           |
| 2.64E-06   | 0.277267463 | 0.268 | 0.234 | 0.084690577 | 2 TYK2          |
| 6.45E-07   | 0.27655486  | 0.344 | 0.308 | 0.020712374 | 2 ASXL3         |
| 3.54E-08   | 0.276537651 | 0.319 | 0.277 | 0.001137393 | 2 ANKRD6        |
| 2.49E-08   | 0.275382647 | 0.336 | 0.293 | 0.000799008 | 2 WDR91         |
| 0.00121333 | 0.275064118 | 0.28  | 0.265 | 1           | 2 SLC44A3       |
| 0.00154518 | 0.274189943 | 0.35  | 0.333 | 1           | 2 MET           |
| 2.95E-23   | 0.273800084 | 0.805 | 0.762 | 9.47E-19    | 2 PPP2R3A       |
| 4.62E-05   | 0.272772692 | 0.307 | 0.282 | 1           | 2 MLLT6         |
| 8.76E-09   | 0.272620472 | 0.513 | 0.478 | 0.000281277 | 2 FAAH2         |
| 0.00026059 | 0.270739313 | 0.364 | 0.353 | 1           | 2 PDXK          |
| 7.45E-05   | 0.270121511 | 0.489 | 0.485 | 1           | 2 USP45         |
| 7.77E-06   | 0.268726724 | 0.457 | 0.449 | 0.249611089 | 2 TTC14         |
| 6.61E-08   | 0.268461798 | 0.291 | 0.252 | 0.002124214 | 2 SGCE          |
| 0.0033861  | 0.26750173  | 0.275 | 0.263 | 1           | 2 SH2B1         |
| 6.73E-06   | 0.267402074 | 0.286 | 0.254 | 0.216260587 | 2 LINC00886     |
| 0.00019883 | 0.267287772 | 0.303 | 0.288 | 1           | 2 MSANTD2       |
| 0.00607549 | 0.266876715 | 0.367 | 0.366 | 1           | 2 SYTL2         |
| 8.00E-05   | 0.266776438 | 0.279 | 0.255 | 1           | 2 MYO5C         |
| 8.27E-06   | 0.265519558 | 0.533 | 0.516 | 0.265585244 | 2 MAN1A1        |
| 0.00017127 | 0.265227248 | 0.313 | 0.289 | 1           | 2 DSTN          |
| 3.21E-14   | 0.265022248 | 0.431 | 0.361 | 1.03E-09    | 2 NTN4          |
| 7.39E-07   | 0.264787467 | 0.382 | 0.357 | 0.023721419 | 2 BCR           |
| 2.35E-08   | 0.263334277 | 0.451 | 0.431 | 0.000755362 | 2 CDH12         |
| 0.00045817 | 0.262997392 | 0.437 | 0.434 | 1           | 2 MPHOSPH8      |
| 0.00091451 | 0.262354696 | 0.361 | 0.354 | 1           | 2 STAG3L5P-PVR1 |
| 0.00024754 | 0.261952851 | 0.286 | 0.266 | 1           | 2 SLC36A4       |
| 0.00296229 | 0.260667282 | 0.355 | 0.351 | 1           | 2 AHCYL1        |
| 2.06E-06   | 0.260557626 | 0.261 | 0.228 | 0.066121639 | 2 RNF145        |
| 6.61E-09   | 0.260543569 | 0.298 | 0.248 | 0.000212373 | 2 KHDRBS3       |
| 0.00013168 | 0.259949201 | 0.371 | 0.36  | 1           | 2 TEX9          |
| 0.00014717 | 0.259778762 | 0.281 | 0.259 | 1           | 2 PRRG1         |
| 0.00021755 | 0.259679622 | 0.319 | 0.298 | 1           | 2 OBSCN         |
| 0.00165622 | 0.25927982  | 0.334 | 0.327 | 1           | 2 DDX24         |
| 0.00081553 | 0.258046883 | 0.371 | 0.365 | 1           | 2 LINC01184     |
| 0.00319151 | 0.256922889 | 0.294 | 0.281 | 1           | 2 NISCH         |
| 3.75E-06   | 0.256430672 | 0.482 | 0.471 | 0.120441292 | 2 ZMYND8        |
| 3.49E-07   | 0.255850264 | 0.523 | 0.498 | 0.011200791 | 2 XKR6          |
| 2.38E-08   | 0.255068916 | 0.651 | 0.654 | 0.000764888 | 2 AP3B1         |
| 8.20E-06   | 0.254999193 | 0.335 | 0.3   | 0.263399153 | 2 AC092683.1    |
| 4.38E-11   | 0.254951574 | 0.578 | 0.542 | 1.41E-06    | 2 SPAG16        |



|            |             |       |       |             |   |              |
|------------|-------------|-------|-------|-------------|---|--------------|
| 6.48E-05   | 0.254817125 | 0.254 | 0.227 |             | 1 | 2 TFEB       |
| 4.78E-07   | 0.254509092 | 0.295 | 0.256 | 0.015359244 |   | 2 LPIN1      |
| 0.00011845 | 0.25444144  | 0.538 | 0.556 |             | 1 | 2 LINC01278  |
| 0.00070594 | 0.253776402 | 0.314 | 0.299 |             | 1 | 2 AC138207.8 |
| 5.19E-05   | 0.253421033 | 0.359 | 0.34  |             | 1 | 2 ASPH       |
| 0.00011264 | 0.253335129 | 0.252 | 0.227 |             | 1 | 2 ARRDC3     |
| 0.00020899 | 0.25315275  | 0.336 | 0.317 |             | 1 | 2 MAPK8IP3   |
| 0.00214065 | 0.253076237 | 0.382 | 0.375 |             | 1 | 2 MTERF1     |
| 1.33E-05   | 0.251573881 | 0.315 | 0.282 | 0.425922609 |   | 2 ANKDD1A    |
| 0.00050646 | 0.251019966 | 0.312 | 0.296 |             | 1 | 2 NAA16      |
| 0          | 2.88528243  | 0.882 | 0.149 |             | 0 | 3 AFM        |
| 0          | 2.862770242 | 0.869 | 0.197 |             | 0 | 3 MIOX       |
| 0          | 2.760070986 | 0.936 | 0.196 |             | 0 | 3 PRODH2     |
| 0          | 2.637439196 | 0.992 | 0.416 |             | 0 | 3 CUBN       |
| 0          | 2.592403138 | 0.996 | 0.314 |             | 0 | 3 ACSM2B     |
| 0          | 2.556457653 | 0.764 | 0.204 |             | 0 | 3 RNF212B    |
| 0          | 2.542850053 | 0.998 | 0.347 |             | 0 | 3 ACSM2A     |
| 0          | 2.458492235 | 0.847 | 0.216 |             | 0 | 3 TINAG      |
| 0          | 2.389891492 | 0.904 | 0.259 |             | 0 | 3 SLC16A9    |
| 0          | 2.383697415 | 0.949 | 0.25  |             | 0 | 3 FTCD       |
| 0          | 2.345318878 | 0.946 | 0.388 |             | 0 | 3 SLC4A4     |
| 0          | 2.317753081 | 0.968 | 0.331 |             | 0 | 3 LRP2       |
| 0          | 2.301788388 | 0.873 | 0.226 |             | 0 | 3 SLC6A13    |
| 0          | 2.282459837 | 0.858 | 0.207 |             | 0 | 3 PAH        |
| 0          | 2.268535424 | 0.836 | 0.182 |             | 0 | 3 SLC22A6    |
| 0          | 2.26559011  | 0.89  | 0.252 |             | 0 | 3 SLC5A12    |
| 0          | 2.239179083 | 0.79  | 0.263 |             | 0 | 3 PCDH15     |
| 0          | 2.219960412 | 0.895 | 0.25  |             | 0 | 3 SLC17A1    |
| 0          | 2.217745075 | 0.805 | 0.245 |             | 0 | 3 LINC00871  |
| 0          | 2.209578971 | 0.904 | 0.228 |             | 0 | 3 SLC13A3    |
| 0          | 2.159866183 | 0.716 | 0.153 |             | 0 | 3 SLC36A2    |
| 0          | 2.143359027 | 0.717 | 0.14  |             | 0 | 3 PLG        |
| 0          | 2.104580804 | 0.802 | 0.181 |             | 0 | 3 AGXT2      |
| 0          | 2.09547333  | 0.813 | 0.209 |             | 0 | 3 GLYAT      |
| 0          | 2.08250149  | 0.873 | 0.304 |             | 0 | 3 UGT1A8     |
| 0          | 2.017779583 | 0.85  | 0.328 |             | 0 | 3 NOX4       |
| 0          | 2.01030622  | 0.854 | 0.277 |             | 0 | 3 MME        |
| 0          | 1.990611524 | 0.955 | 0.491 |             | 0 | 3 PTH1R      |
| 0          | 1.986228583 | 0.754 | 0.171 |             | 0 | 3 ALDOB      |
| 0          | 1.971150941 | 0.631 | 0.133 |             | 0 | 3 SLC34A1    |
| 0          | 1.950709259 | 0.729 | 0.185 |             | 0 | 3 SLC13A1    |
| 0          | 1.939018631 | 0.684 | 0.156 |             | 0 | 3 DPYS       |
| 0          | 1.913988248 | 0.705 | 0.288 |             | 0 | 3 CYP3A5     |
| 0          | 1.905936685 | 0.956 | 0.578 |             | 0 | 3 RAB11FIP3  |
| 0          | 1.895340486 | 0.846 | 0.247 |             | 0 | 3 GPX3       |
| 0          | 1.894381649 | 0.823 | 0.352 |             | 0 | 3 KCNJ15     |
| 0          | 1.873429359 | 0.595 | 0.099 |             | 0 | 3 AC010451.1 |
| 0          | 1.857741204 | 0.717 | 0.227 |             | 0 | 3 AC027288.3 |
| 0          | 1.843081024 | 0.858 | 0.512 |             | 0 | 3 GUSBP11    |
| 0          | 1.836454749 | 0.71  | 0.228 |             | 0 | 3 Z93403.1   |
| 0          | 1.813275025 | 0.658 | 0.182 |             | 0 | 3 XYLB       |

|           |             |       |       |           |              |
|-----------|-------------|-------|-------|-----------|--------------|
| 0         | 1.809470055 | 0.544 | 0.164 | 0         | 3 ZNF804B    |
| 0         | 1.803076479 | 0.702 | 0.177 | 0         | 3 AL589669.1 |
| 0         | 1.799530653 | 0.698 | 0.201 | 0         | 3 AL391117.1 |
| 0         | 1.791116407 | 0.783 | 0.304 | 0         | 3 CCDC200    |
| 0         | 1.783051608 | 0.695 | 0.237 | 0         | 3 ENPP7P8    |
| 0         | 1.770609041 | 0.636 | 0.241 | 0         | 3 SLC7A8     |
| 6.14E-307 | 1.757238639 | 0.701 | 0.359 | 1.97E-302 | 3 PLPPR1     |
| 0         | 1.749788809 | 0.645 | 0.219 | 0         | 3 FAM20C     |
| 0         | 1.739854526 | 0.784 | 0.244 | 0         | 3 ACSF2      |
| 0         | 1.734166509 | 0.598 | 0.14  | 0         | 3 SLC27A2    |
| 0         | 1.728565872 | 0.587 | 0.106 | 0         | 3 SLC22A8    |
| 0         | 1.723274607 | 0.701 | 0.221 | 0         | 3 LINC00671  |
| 0         | 1.720483153 | 0.633 | 0.241 | 0         | 3 AC008554.1 |
| 0         | 1.717674078 | 0.693 | 0.211 | 0         | 3 LINC01060  |
| 0         | 1.715283244 | 0.726 | 0.213 | 0         | 3 AC096577.1 |
| 0         | 1.714111172 | 0.61  | 0.183 | 0         | 3 RMST       |
| 0         | 1.713674306 | 0.528 | 0.105 | 0         | 3 ADGRG5     |
| 0         | 1.696953434 | 0.663 | 0.317 | 0         | 3 PDPR       |
| 0         | 1.693449901 | 0.66  | 0.161 | 0         | 3 SLC28A1    |
| 0         | 1.686658913 | 0.713 | 0.234 | 0         | 3 SLC47A1    |
| 7.53E-262 | 1.664278908 | 0.776 | 0.597 | 2.42E-257 | 3 ULK4       |
| 0         | 1.658266258 | 0.902 | 0.422 | 0         | 3 PDZD2      |
| 0         | 1.655757998 | 0.668 | 0.164 | 0         | 3 HNF4A      |
| 0         | 1.648920954 | 0.599 | 0.141 | 0         | 3 CLEC18A    |
| 0         | 1.63016919  | 0.687 | 0.195 | 0         | 3 ASS1       |
| 3.29E-299 | 1.623986099 | 0.561 | 0.22  | 1.06E-294 | 3 ARSB       |
| 0         | 1.617518956 | 0.758 | 0.327 | 0         | 3 CNTNAP3B   |
| 0         | 1.616835998 | 0.735 | 0.394 | 0         | 3 ANK2       |
| 0         | 1.598451567 | 0.526 | 0.124 | 0         | 3 SLC7A7     |
| 0         | 1.593273276 | 0.584 | 0.14  | 0         | 3 SLC17A3    |
| 0         | 1.588125841 | 0.865 | 0.566 | 0         | 3 FGGY       |
| 0         | 1.582969261 | 0.68  | 0.235 | 0         | 3 EBNA1BP2   |
| 0         | 1.576078034 | 0.743 | 0.263 | 0         | 3 ENPEP      |
| 0         | 1.570970468 | 0.524 | 0.102 | 0         | 3 SLC17A4    |
| 0         | 1.562373112 | 0.679 | 0.261 | 0         | 3 CNTNAP3P2  |
| 0         | 1.54953184  | 0.599 | 0.183 | 0         | 3 AK4        |
| 7.57E-226 | 1.533431363 | 0.343 | 0.096 | 2.43E-221 | 3 CACNA1E    |
| 0         | 1.532349748 | 0.778 | 0.417 | 0         | 3 SUGCT      |
| 0         | 1.526724503 | 0.646 | 0.241 | 0         | 3 RASSF4     |
| 0         | 1.525498532 | 0.89  | 0.596 | 0         | 3 L3MBTL4    |
| 0         | 1.50807923  | 0.555 | 0.143 | 0         | 3 HECW1      |
| 0         | 1.494056094 | 0.517 | 0.142 | 0         | 3 FIGNL1     |
| 0         | 1.484199583 | 0.751 | 0.428 | 0         | 3 TPCN1      |
| 3.08E-169 | 1.464703197 | 0.583 | 0.366 | 9.88E-165 | 3 MFSD14B    |
| 0         | 1.461082681 | 0.512 | 0.114 | 0         | 3 AC087762.1 |
| 0         | 1.458661833 | 0.916 | 0.719 | 0         | 3 LINGO1     |
| 0         | 1.45243578  | 0.495 | 0.153 | 0         | 3 AF228730.5 |
| 0         | 1.448516307 | 0.504 | 0.13  | 0         | 3 NPL        |
| 0         | 1.446969256 | 0.523 | 0.168 | 0         | 3 AL110292.1 |
| 0         | 1.446158576 | 0.754 | 0.353 | 0         | 3 BNC2       |
| 1.50E-290 | 1.443098967 | 0.723 | 0.421 | 4.82E-286 | 3 MSRA       |

|           |             |       |       |           |               |
|-----------|-------------|-------|-------|-----------|---------------|
| 0         | 1.437603467 | 0.432 | 0.071 | 0         | 3 LINC02499   |
| 2.55E-273 | 1.430184552 | 0.577 | 0.254 | 8.19E-269 | 3 NQO2        |
| 0         | 1.429129098 | 0.614 | 0.239 | 0         | 3 EHHADH      |
| 0         | 1.428427609 | 0.522 | 0.134 | 0         | 3 ABCC2       |
| 0         | 1.417395086 | 0.501 | 0.12  | 0         | 3 MAF         |
| 3.71E-306 | 1.416160591 | 0.658 | 0.302 | 1.19E-301 | 3 SLC12A6     |
| 2.23E-303 | 1.415551559 | 0.533 | 0.187 | 7.16E-299 | 3 MLXIPL      |
| 5.85E-274 | 1.413997181 | 0.827 | 0.609 | 1.88E-269 | 3 KCNQ1OT1    |
| 4.28E-300 | 1.411278419 | 0.756 | 0.486 | 1.37E-295 | 3 MIA2        |
| 0         | 1.388323154 | 0.541 | 0.154 | 0         | 3 SLC47A2     |
| 0         | 1.386624686 | 0.844 | 0.507 | 0         | 3 NCKAP5      |
| 3.72E-210 | 1.377158706 | 0.367 | 0.118 | 1.20E-205 | 3 AC011287.1  |
| 0         | 1.374087928 | 0.467 | 0.104 | 0         | 3 AMN         |
| 3.78E-275 | 1.373634057 | 0.813 | 0.6   | 1.21E-270 | 3 SRRM2       |
| 0         | 1.373439167 | 0.533 | 0.144 | 0         | 3 GDA         |
| 0         | 1.372118764 | 0.511 | 0.133 | 0         | 3 MAPT        |
| 0         | 1.365310815 | 0.517 | 0.115 | 0         | 3 UPB1        |
| 0         | 1.358091503 | 0.497 | 0.13  | 0         | 3 AC087482.1  |
| 0         | 1.353517332 | 0.542 | 0.175 | 0         | 3 SMIM2-AS1   |
| 7.34E-295 | 1.351575367 | 0.797 | 0.567 | 2.36E-290 | 3 TNS1        |
| 0         | 1.350085124 | 0.546 | 0.145 | 0         | 3 DPEP1       |
| 0         | 1.345064142 | 0.353 | 0.057 | 0         | 3 AP003400.1  |
| 7.22E-275 | 1.343522768 | 0.592 | 0.254 | 2.32E-270 | 3 TENM1       |
| 1.62E-291 | 1.343365964 | 0.686 | 0.3   | 5.20E-287 | 3 GRAMD1B     |
| 0         | 1.332757023 | 0.486 | 0.11  | 0         | 3 FUT6        |
| 0         | 1.332410919 | 0.364 | 0.066 | 0         | 3 LINC01349   |
| 0         | 1.330989481 | 0.481 | 0.122 | 0         | 3 PDZK1IP1    |
| 0         | 1.326074222 | 0.934 | 0.792 | 0         | 3 PLEKHA5     |
| 8.81E-292 | 1.318358333 | 0.819 | 0.572 | 2.83E-287 | 3 AC068587.4  |
| 1.19E-242 | 1.315302465 | 0.622 | 0.32  | 3.81E-238 | 3 C9          |
| 7.97E-270 | 1.308250005 | 0.512 | 0.187 | 2.56E-265 | 3 LINC01239   |
| 0         | 1.304779745 | 0.423 | 0.086 | 0         | 3 SLC6A19     |
| 0         | 1.303140224 | 0.46  | 0.107 | 0         | 3 SLC22A11    |
| 0         | 1.302879922 | 0.377 | 0.07  | 0         | 3 AC006305.1  |
| 5.70E-286 | 1.288815376 | 0.449 | 0.13  | 1.83E-281 | 3 CDH9        |
| 0         | 1.278928642 | 0.534 | 0.149 | 0         | 3 ANPEP       |
| 9.13E-257 | 1.276278887 | 0.463 | 0.159 | 2.93E-252 | 3 IGSF11      |
| 1.87E-233 | 1.276046163 | 0.548 | 0.244 | 6.02E-229 | 3 LSP1P4      |
| 7.62E-254 | 1.273646884 | 0.581 | 0.256 | 2.45E-249 | 3 PDZK1       |
| 5.37E-304 | 1.265769595 | 0.61  | 0.226 | 1.72E-299 | 3 RHOBTB1     |
| 7.56E-161 | 1.263661606 | 0.572 | 0.346 | 2.43E-156 | 3 RTTN        |
| 0         | 1.257235536 | 0.996 | 0.819 | 0         | 3 PTH2R       |
| 0         | 1.254439068 | 0.457 | 0.121 | 0         | 3 CLEC18B     |
| 4.38E-264 | 1.253790072 | 0.618 | 0.269 | 1.41E-259 | 3 MIR100HG    |
| 0         | 1.252929389 | 0.519 | 0.149 | 0         | 3 GLIS1       |
| 0         | 1.244055672 | 0.646 | 0.26  | 0         | 3 BBOX1       |
| 2.23E-283 | 1.243596455 | 0.449 | 0.135 | 7.16E-279 | 3 ABHD14A-ACY |
| 0         | 1.241529352 | 0.378 | 0.076 | 0         | 3 SLC2A2      |
| 9.17E-222 | 1.230948014 | 0.721 | 0.497 | 2.94E-217 | 3 PPARA       |
| 9.36E-295 | 1.229073372 | 0.742 | 0.385 | 3.01E-290 | 3 ERFFI1      |
| 5.07E-196 | 1.226862136 | 0.693 | 0.492 | 1.63E-191 | 3 DMGDH       |

|           |             |       |       |           |               |
|-----------|-------------|-------|-------|-----------|---------------|
| 8.31E-282 | 1.2254131   | 0.636 | 0.267 | 2.67E-277 | 3 UGT2B7      |
| 0         | 1.220759031 | 0.401 | 0.091 | 0         | 3 LINC00390   |
| 9.86E-186 | 1.218237389 | 0.547 | 0.272 | 3.17E-181 | 3 LINC01515   |
| 1.17E-266 | 1.217725834 | 0.828 | 0.646 | 3.77E-262 | 3 INSR        |
| 0         | 1.216368387 | 0.302 | 0.044 | 0         | 3 LINC02128   |
| 4.88E-268 | 1.21503072  | 0.473 | 0.162 | 1.57E-263 | 3 ABCC6       |
| 1.34E-252 | 1.214779122 | 0.577 | 0.248 | 4.29E-248 | 3 CCNT2-AS1   |
| 3.79E-177 | 1.21340725  | 0.545 | 0.309 | 1.22E-172 | 3 MTARC2      |
| 8.19E-188 | 1.212649177 | 0.601 | 0.335 | 2.63E-183 | 3 SLC1A1      |
| 0         | 1.212484155 | 0.39  | 0.074 | 0         | 3 TMEM246-AS1 |
| 3.15E-177 | 1.21157094  | 0.504 | 0.256 | 1.01E-172 | 3 FN3K        |
| 0         | 1.210595062 | 0.398 | 0.093 | 0         | 3 ACSM5       |
| 0         | 1.209683718 | 0.353 | 0.067 | 0         | 3 KHK         |
| 1.95E-270 | 1.205499733 | 0.505 | 0.165 | 6.28E-266 | 3 AC004053.1  |
| 3.13E-258 | 1.202279513 | 0.422 | 0.131 | 1.01E-253 | 3 AP000346.1  |
| 2.44E-214 | 1.201648266 | 0.545 | 0.255 | 7.83E-210 | 3 BHMT2       |
| 2.36E-213 | 1.197347364 | 0.417 | 0.147 | 7.58E-209 | 3 RASA4B      |
| 0         | 1.189275914 | 0.372 | 0.084 | 0         | 3 TRPC7       |
| 3.83E-299 | 1.187726305 | 0.358 | 0.079 | 1.23E-294 | 3 G6PC        |
| 3.02E-147 | 1.187563956 | 0.576 | 0.361 | 9.69E-143 | 3 CCDC146     |
| 5.71E-244 | 1.186063141 | 0.395 | 0.122 | 1.83E-239 | 3 CMBL        |
| 5.70E-142 | 1.185690598 | 0.569 | 0.357 | 1.83E-137 | 3 SLC43A2     |
| 2.06E-239 | 1.181876399 | 0.46  | 0.161 | 6.62E-235 | 3 TNFRSF14    |
| 1.62E-146 | 1.174068123 | 0.471 | 0.242 | 5.21E-142 | 3 HNMT        |
| 1.11E-262 | 1.169371529 | 0.404 | 0.116 | 3.56E-258 | 3 DRAIC       |
| 4.09E-174 | 1.164945321 | 0.66  | 0.455 | 1.31E-169 | 3 FBXO21      |
| 1.06E-266 | 1.164384997 | 0.413 | 0.122 | 3.41E-262 | 3 P4HA2       |
| 0         | 1.163248371 | 0.922 | 0.694 | 0         | 3 DLG2        |
| 1.58E-189 | 1.159849673 | 0.479 | 0.211 | 5.07E-185 | 3 ALDH3A2     |
| 2.13E-149 | 1.153584562 | 0.599 | 0.396 | 6.85E-145 | 3 DMXL2       |
| 2.44E-220 | 1.153046009 | 0.389 | 0.122 | 7.85E-216 | 3 GGT1        |
| 9.14E-270 | 1.151633971 | 0.381 | 0.104 | 2.94E-265 | 3 AC009060.1  |
| 1.16E-186 | 1.149608854 | 0.516 | 0.246 | 3.72E-182 | 3 LSP1P5      |
| 1.84E-203 | 1.147409313 | 0.366 | 0.118 | 5.92E-199 | 3 GGT3P       |
| 2.93E-208 | 1.141368069 | 0.427 | 0.152 | 9.41E-204 | 3 SLC25A48    |
| 2.28E-243 | 1.141245759 | 0.425 | 0.133 | 7.31E-239 | 3 ATP8B4      |
| 3.67E-271 | 1.140915573 | 0.725 | 0.351 | 1.18E-266 | 3 PTPRD       |
| 1.68E-217 | 1.13887558  | 0.408 | 0.136 | 5.39E-213 | 3 SYNDIG1     |
| 0         | 1.131433898 | 0.302 | 0.047 | 0         | 3 AC004870.3  |
| 6.77E-149 | 1.131048833 | 0.509 | 0.284 | 2.18E-144 | 3 TM7SF3      |
| 7.76E-186 | 1.129286662 | 0.41  | 0.148 | 2.49E-181 | 3 CXXC4-AS1   |
| 1.71E-257 | 1.128993839 | 0.321 | 0.076 | 5.49E-253 | 3 LINC01277   |
| 0         | 1.127786489 | 0.519 | 0.14  | 0         | 3 CYP4A11     |
| 1.99E-206 | 1.125827658 | 0.461 | 0.181 | 6.39E-202 | 3 GIPC2       |
| 1.08E-244 | 1.125291027 | 0.465 | 0.159 | 3.46E-240 | 3 DOK6        |
| 3.75E-166 | 1.124761943 | 0.635 | 0.396 | 1.20E-161 | 3 MCF2L       |
| 0         | 1.123436106 | 0.423 | 0.099 | 0         | 3 CYP4F3      |
| 1.36E-223 | 1.117564165 | 0.82  | 0.556 | 4.37E-219 | 3 RALYL       |
| 6.45E-179 | 1.108672562 | 0.414 | 0.163 | 2.07E-174 | 3 FAAH        |
| 8.24E-210 | 1.10794048  | 0.507 | 0.217 | 2.65E-205 | 3 CNTNAP3     |
| 2.23E-130 | 1.104743277 | 0.726 | 0.6   | 7.18E-126 | 3 GOLGB1      |

|           |             |       |       |           |                |
|-----------|-------------|-------|-------|-----------|----------------|
| 1.44E-234 | 1.102277718 | 0.417 | 0.136 | 4.61E-230 | 3 ABHD6        |
| 8.67E-144 | 1.097426496 | 0.504 | 0.271 | 2.78E-139 | 3 D2HGDH       |
| 1.52E-256 | 1.096588814 | 0.817 | 0.583 | 4.89E-252 | 3 ADAMTS9      |
| 0         | 1.091339221 | 0.333 | 0.053 | 0         | 3 LINC01020    |
| 3.78E-253 | 1.089189276 | 0.314 | 0.073 | 1.21E-248 | 3 ARHGAP29-AS1 |
| 0         | 1.078375241 | 0.336 | 0.068 | 0         | 3 PGAP4        |
| 2.19E-142 | 1.075215347 | 0.581 | 0.365 | 7.04E-138 | 3 LIN52        |
| 3.90E-131 | 1.074194652 | 0.463 | 0.246 | 1.25E-126 | 3 AC005726.1   |
| 2.26E-252 | 1.071819651 | 0.617 | 0.256 | 7.26E-248 | 3 SORCS1       |
| 8.30E-258 | 1.070777833 | 0.375 | 0.102 | 2.66E-253 | 3 KYNU         |
| 3.95E-276 | 1.06811187  | 0.7   | 0.304 | 1.27E-271 | 3 SLC2A9       |
| 5.41E-239 | 1.066796854 | 0.34  | 0.089 | 1.74E-234 | 3 CDHR5        |
| 2.79E-263 | 1.064823129 | 0.88  | 0.755 | 8.95E-259 | 3 CDK14        |
| 2.16E-211 | 1.064256796 | 0.572 | 0.261 | 6.93E-207 | 3 PCSK5        |
| 1.04E-135 | 1.058048907 | 0.454 | 0.227 | 3.33E-131 | 3 DIRC3        |
| 1.34E-201 | 1.056578563 | 0.47  | 0.189 | 4.30E-197 | 3 SHMT1        |
| 1.81E-123 | 1.05651618  | 0.627 | 0.453 | 5.82E-119 | 3 KIF12        |
| 3.73E-229 | 1.055347789 | 0.36  | 0.104 | 1.20E-224 | 3 HSD17B14     |
| 5.49E-159 | 1.05407148  | 0.63  | 0.411 | 1.76E-154 | 3 HPN          |
| 1.27E-280 | 1.050647745 | 0.881 | 0.591 | 4.07E-276 | 3 TRPM3        |
| 1.94E-125 | 1.046886675 | 0.412 | 0.191 | 6.25E-121 | 3 AC004870.4   |
| 3.79E-97  | 1.043913676 | 0.546 | 0.38  | 1.22E-92  | 3 SHROOM4      |
| 8.68E-36  | 1.043237895 | 0.57  | 0.569 | 2.79E-31  | 3 RDX          |
| 9.76E-212 | 1.036540104 | 0.388 | 0.121 | 3.13E-207 | 3 CYP4Z1       |
| 6.80E-170 | 1.036315374 | 0.45  | 0.193 | 2.18E-165 | 3 IL6R         |
| 5.68E-248 | 1.035531336 | 0.316 | 0.076 | 1.82E-243 | 3 COTL1        |
| 8.11E-195 | 1.031283092 | 0.372 | 0.127 | 2.61E-190 | 3 AKR1A1       |
| 1.27E-232 | 1.028544222 | 0.411 | 0.125 | 4.08E-228 | 3 KCNK5        |
| 5.82E-233 | 1.023208673 | 0.375 | 0.109 | 1.87E-228 | 3 GLYATL1      |
| 3.53E-270 | 1.022804657 | 0.342 | 0.081 | 1.13E-265 | 3 SLC39A5      |
| 2.40E-190 | 1.022657437 | 0.359 | 0.118 | 7.72E-186 | 3 PRSS51       |
| 4.31E-122 | 1.022510782 | 0.576 | 0.393 | 1.39E-117 | 3 SH3YL1       |
| 1.15E-103 | 1.02127897  | 0.404 | 0.221 | 3.70E-99  | 3 GK           |
| 5.16E-167 | 1.020297281 | 0.433 | 0.184 | 1.66E-162 | 3 TTC38        |
| 1.18E-126 | 1.018226606 | 0.378 | 0.168 | 3.78E-122 | 3 PARP10       |
| 6.97E-223 | 1.017966312 | 0.331 | 0.091 | 2.24E-218 | 3 BHMT         |
| 1.24E-103 | 1.016803037 | 0.477 | 0.28  | 4.00E-99  | 3 AC113414.1   |
| 1.21E-70  | 1.013513789 | 0.534 | 0.395 | 3.90E-66  | 3 CMYA5        |
| 5.81E-262 | 1.011162074 | 0.33  | 0.079 | 1.87E-257 | 3 SLC7A9       |
| 9.03E-241 | 1.010433973 | 0.361 | 0.097 | 2.90E-236 | 3 AC004485.1   |
| 2.34E-174 | 1.010178883 | 0.369 | 0.133 | 7.53E-170 | 3 ASPA         |
| 6.52E-145 | 1.009832236 | 0.681 | 0.498 | 2.09E-140 | 3 DENND5B      |
| 3.11E-133 | 1.009349638 | 0.452 | 0.232 | 9.99E-129 | 3 ADAMTS9-AS1  |
| 2.55E-214 | 1.007855948 | 0.573 | 0.245 | 8.18E-210 | 3 PRUNE2       |
| 1.43E-238 | 1.007050487 | 0.437 | 0.137 | 4.61E-234 | 3 CYP4A22-AS1  |
| 0         | 1.006827524 | 0.32  | 0.062 | 0         | 3 AL121999.1   |
| 4.09E-186 | 1.006199088 | 0.413 | 0.158 | 1.31E-181 | 3 GALM         |
| 2.87E-174 | 1.004092566 | 0.69  | 0.432 | 9.21E-170 | 3 GALNT14      |
| 2.24E-212 | 1.002309559 | 0.855 | 0.767 | 7.19E-208 | 3 GOLGA4       |
| 2.09E-297 | 1.002300279 | 0.302 | 0.058 | 6.72E-293 | 3 XPNPEP2      |
| 3.75E-150 | 0.999196672 | 0.522 | 0.275 | 1.20E-145 | 3 KIAA1549     |

|           |             |       |       |           |              |
|-----------|-------------|-------|-------|-----------|--------------|
| 2.11E-300 | 0.998163965 | 0.322 | 0.066 | 6.78E-296 | 3 FMO1       |
| 1.21E-123 | 0.997545229 | 0.396 | 0.187 | 3.88E-119 | 3 CALM1      |
| 6.68E-74  | 0.995503773 | 0.45  | 0.301 | 2.14E-69  | 3 ZNF69      |
| 8.15E-222 | 0.99466073  | 0.345 | 0.092 | 2.62E-217 | 3 ST18       |
| 4.13E-207 | 0.989401851 | 0.355 | 0.104 | 1.33E-202 | 3 AC018467.1 |
| 1.15E-218 | 0.987847648 | 0.373 | 0.112 | 3.69E-214 | 3 LINC02027  |
| 8.20E-125 | 0.987124678 | 0.46  | 0.236 | 2.64E-120 | 3 COL27A1    |
| 2.25E-149 | 0.985879649 | 0.339 | 0.125 | 7.23E-145 | 3 RSAD1      |
| 1.95E-161 | 0.985399704 | 0.381 | 0.151 | 6.25E-157 | 3 SFXN2      |
| 4.28E-279 | 0.981044904 | 0.26  | 0.045 | 1.37E-274 | 3 SLC22A12   |
| 2.57E-129 | 0.978651056 | 0.49  | 0.267 | 8.25E-125 | 3 AFMID      |
| 4.26E-151 | 0.977036188 | 0.507 | 0.253 | 1.37E-146 | 3 CDHR3      |
| 9.83E-190 | 0.975761396 | 0.363 | 0.12  | 3.16E-185 | 3 LINC02275  |
| 0         | 0.974949687 | 0.929 | 0.861 | 0         | 3 PATJ       |
| 8.17E-131 | 0.974889016 | 0.567 | 0.352 | 2.62E-126 | 3 ALDH1L1    |
| 9.62E-237 | 0.974541799 | 0.328 | 0.084 | 3.09E-232 | 3 OR2T11     |
| 1.50E-212 | 0.974398814 | 0.332 | 0.094 | 4.82E-208 | 3 AL358232.1 |
| 2.20E-164 | 0.971729673 | 0.348 | 0.122 | 7.08E-160 | 3 DLGAP2     |
| 6.14E-131 | 0.969469158 | 0.42  | 0.203 | 1.97E-126 | 3 TRPV1      |
| 3.89E-156 | 0.96920216  | 0.343 | 0.124 | 1.25E-151 | 3 PRR5       |
| 1.59E-97  | 0.968771451 | 0.464 | 0.282 | 5.10E-93  | 3 ZFAT       |
| 7.07E-138 | 0.967431734 | 0.65  | 0.469 | 2.27E-133 | 3 CRYL1      |
| 1.48E-215 | 0.962542339 | 0.944 | 0.876 | 4.76E-211 | 3 SYNE2      |
| 1.74E-100 | 0.96035099  | 0.305 | 0.13  | 5.58E-96  | 3 AL031599.1 |
| 8.55E-221 | 0.958761225 | 0.325 | 0.087 | 2.75E-216 | 3 CLEC18C    |
| 6.16E-118 | 0.956507355 | 0.352 | 0.157 | 1.98E-113 | 3 KLKB1      |
| 1.44E-169 | 0.954020309 | 0.33  | 0.109 | 4.64E-165 | 3 SLC6A12    |
| 3.35E-189 | 0.952096258 | 0.711 | 0.41  | 1.08E-184 | 3 NLGN1      |
| 3.00E-96  | 0.951577635 | 0.449 | 0.266 | 9.65E-92  | 3 GANC       |
| 1.41E-149 | 0.950353833 | 0.7   | 0.495 | 4.53E-145 | 3 EPB41L3    |
| 3.23E-189 | 0.950130591 | 0.273 | 0.07  | 1.04E-184 | 3 SLC5A10    |
| 1.68E-105 | 0.947911197 | 0.357 | 0.169 | 5.40E-101 | 3 IQCA1      |
| 1.76E-142 | 0.94283054  | 0.56  | 0.314 | 5.67E-138 | 3 PRLR       |
| 9.97E-189 | 0.94134148  | 0.264 | 0.065 | 3.20E-184 | 3 GGTL2      |
| 2.01E-156 | 0.940960196 | 0.472 | 0.218 | 6.47E-152 | 3 RGL1       |
| 5.38E-134 | 0.937538333 | 0.416 | 0.192 | 1.73E-129 | 3 PEPD       |
| 2.10E-104 | 0.937191254 | 0.293 | 0.119 | 6.75E-100 | 3 GADD45A    |
| 1.32E-198 | 0.937133008 | 0.437 | 0.156 | 4.24E-194 | 3 CDH2       |
| 3.18E-101 | 0.935518386 | 0.627 | 0.504 | 1.02E-96  | 3 MAP3K13    |
| 1.19E-126 | 0.934823127 | 0.678 | 0.511 | 3.82E-122 | 3 HNF1A-AS1  |
| 2.14E-132 | 0.933898485 | 0.708 | 0.587 | 6.87E-128 | 3 VPS13A     |
| 7.67E-174 | 0.933393554 | 0.364 | 0.126 | 2.46E-169 | 3 FBP1       |
| 1.02E-78  | 0.932847489 | 0.465 | 0.313 | 3.27E-74  | 3 KLHL20     |
| 2.03E-157 | 0.932224709 | 0.402 | 0.163 | 6.53E-153 | 3 SLC25A42   |
| 2.53E-196 | 0.931745362 | 0.329 | 0.096 | 8.14E-192 | 3 MYO7B      |
| 1.26E-128 | 0.927285657 | 0.479 | 0.242 | 4.04E-124 | 3 SYT1       |
| 4.66E-255 | 0.926938067 | 0.337 | 0.081 | 1.50E-250 | 3 HAO2       |
| 1.61E-210 | 0.925808473 | 0.32  | 0.086 | 5.16E-206 | 3 AL033381.1 |
| 1.79E-149 | 0.925700217 | 0.32  | 0.111 | 5.74E-145 | 3 KHDRBS2    |
| 1.04E-79  | 0.92396497  | 0.428 | 0.257 | 3.33E-75  | 3 EDA        |
| 2.06E-90  | 0.922157099 | 0.451 | 0.276 | 6.63E-86  | 3 ACSS2      |

|           |             |       |       |           |                 |
|-----------|-------------|-------|-------|-----------|-----------------|
| 6.70E-112 | 0.920533541 | 0.459 | 0.247 | 2.15E-107 | 3 DDX58         |
| 4.67E-209 | 0.920257372 | 0.295 | 0.075 | 1.50E-204 | 3 KMO           |
| 1.21E-221 | 0.918162893 | 0.261 | 0.056 | 3.87E-217 | 3 GSTA2         |
| 2.77E-131 | 0.917625942 | 0.346 | 0.14  | 8.91E-127 | 3 LYPLAL1-AS1   |
| 7.25E-120 | 0.915348928 | 0.39  | 0.186 | 2.33E-115 | 3 AC012651.1    |
| 2.24E-71  | 0.911654878 | 0.511 | 0.391 | 7.18E-67  | 3 SUCLG1        |
| 2.47E-93  | 0.911326004 | 0.452 | 0.272 | 7.93E-89  | 3 SNX30         |
| 1.82E-165 | 0.91066799  | 0.307 | 0.096 | 5.84E-161 | 3 HPD           |
| 4.84E-88  | 0.905620343 | 0.601 | 0.489 | 1.56E-83  | 3 TBC1D19       |
| 2.00E-137 | 0.903271986 | 0.337 | 0.129 | 6.41E-133 | 3 NSMF          |
| 5.12E-86  | 0.901498388 | 0.472 | 0.318 | 1.64E-81  | 3 GPR89B        |
| 2.54E-48  | 0.901290891 | 0.371 | 0.251 | 8.15E-44  | 3 CCDC144B      |
| 9.76E-160 | 0.900133728 | 0.367 | 0.139 | 3.13E-155 | 3 EAF2          |
| 9.76E-137 | 0.892069215 | 0.339 | 0.13  | 3.14E-132 | 3 PC            |
| 1.74E-87  | 0.890648921 | 0.603 | 0.437 | 5.60E-83  | 3 GPAT3         |
| 3.03E-134 | 0.889942501 | 0.358 | 0.148 | 9.72E-130 | 3 AC116562.3    |
| 7.19E-154 | 0.88845049  | 0.327 | 0.116 | 2.31E-149 | 3 AC009053.3    |
| 1.06E-157 | 0.885200626 | 0.299 | 0.097 | 3.41E-153 | 3 LINC01322     |
| 4.26E-88  | 0.883393464 | 0.406 | 0.229 | 1.37E-83  | 3 DHTKD1        |
| 9.98E-130 | 0.882023633 | 0.274 | 0.095 | 3.20E-125 | 3 MTARC1        |
| 2.07E-94  | 0.880738324 | 0.383 | 0.199 | 6.63E-90  | 3 ZNF826P       |
| 1.45E-89  | 0.879992939 | 0.627 | 0.501 | 4.66E-85  | 3 KIFC3         |
| 5.82E-71  | 0.875409478 | 0.427 | 0.279 | 1.87E-66  | 3 CELSR1        |
| 1.44E-168 | 0.8753182   | 0.296 | 0.089 | 4.62E-164 | 3 PNPLA3        |
| 6.63E-253 | 0.872335673 | 0.252 | 0.046 | 2.13E-248 | 3 GDNF-AS1      |
| 3.33E-104 | 0.870728588 | 0.387 | 0.192 | 1.07E-99  | 3 ESR1          |
| 5.57E-139 | 0.870225846 | 0.281 | 0.093 | 1.79E-134 | 3 SLC26A6       |
| 6.52E-129 | 0.868227635 | 0.37  | 0.16  | 2.09E-124 | 3 SPATA22       |
| 2.59E-140 | 0.861988045 | 0.383 | 0.153 | 8.32E-136 | 3 AGMO          |
| 4.30E-92  | 0.861251712 | 0.4   | 0.218 | 1.38E-87  | 3 SAT2          |
| 1.92E-108 | 0.860170979 | 0.567 | 0.366 | 6.16E-104 | 3 FRMD4B        |
| 2.86E-104 | 0.857619211 | 0.302 | 0.125 | 9.18E-100 | 3 BBOX1-AS1     |
| 1.94E-181 | 0.856320183 | 0.298 | 0.086 | 6.25E-177 | 3 ABCC6P1       |
| 8.83E-262 | 0.855546295 | 0.251 | 0.044 | 2.84E-257 | 3 CTD-3080P12.3 |
| 8.15E-93  | 0.854796499 | 0.687 | 0.623 | 2.62E-88  | 3 DMXL1         |
| 2.58E-83  | 0.852259006 | 0.468 | 0.296 | 8.30E-79  | 3 LINC02334     |
| 1.12E-120 | 0.850777703 | 0.337 | 0.132 | 3.60E-116 | 3 LINC02147     |
| 1.11E-61  | 0.85074079  | 0.53  | 0.432 | 3.55E-57  | 3 AGPAT3        |
| 6.52E-76  | 0.850681396 | 0.434 | 0.287 | 2.09E-71  | 3 STX3          |
| 7.25E-80  | 0.850457787 | 0.399 | 0.233 | 2.33E-75  | 3 NPR3          |
| 5.78E-78  | 0.849921685 | 0.326 | 0.167 | 1.86E-73  | 3 SIGIRR        |
| 4.32E-78  | 0.847557243 | 0.434 | 0.264 | 1.39E-73  | 3 SCTR          |
| 2.36E-115 | 0.843811605 | 0.33  | 0.14  | 7.59E-111 | 3 BCAT2         |
| 1.12E-150 | 0.842139497 | 0.272 | 0.083 | 3.60E-146 | 3 LINC01847     |
| 2.27E-89  | 0.841046977 | 0.325 | 0.157 | 7.30E-85  | 3 RTKN          |
| 2.09E-74  | 0.840059608 | 0.591 | 0.514 | 6.70E-70  | 3 MICU1         |
| 4.10E-67  | 0.839800936 | 0.539 | 0.415 | 1.32E-62  | 3 EPS8L2        |
| 4.44E-156 | 0.839434717 | 0.823 | 0.65  | 1.43E-151 | 3 MAST4         |
| 4.60E-100 | 0.838814294 | 0.666 | 0.507 | 1.48E-95  | 3 PCLO          |
| 1.94E-106 | 0.837126469 | 0.443 | 0.24  | 6.23E-102 | 3 HGD           |
| 2.98E-115 | 0.835714923 | 0.323 | 0.132 | 9.59E-111 | 3 FGFR3         |

|           |             |       |       |           |              |
|-----------|-------------|-------|-------|-----------|--------------|
| 3.83E-107 | 0.834942821 | 0.786 | 0.778 | 1.23E-102 | 3 TNRC6A     |
| 1.55E-59  | 0.832687503 | 0.374 | 0.237 | 4.99E-55  | 3 AC127526.3 |
| 1.28E-169 | 0.830560855 | 0.286 | 0.083 | 4.10E-165 | 3 ENPP6      |
| 8.08E-102 | 0.830342557 | 0.66  | 0.525 | 2.60E-97  | 3 TLN2       |
| 1.06E-73  | 0.829026244 | 0.403 | 0.248 | 3.42E-69  | 3 C11orf54   |
| 4.95E-82  | 0.828648319 | 0.642 | 0.535 | 1.59E-77  | 3 NPIPB12    |
| 2.57E-113 | 0.828250122 | 0.301 | 0.119 | 8.26E-109 | 3 CHDH       |
| 2.30E-55  | 0.828242783 | 0.401 | 0.268 | 7.38E-51  | 3 LINC01572  |
| 8.90E-147 | 0.828171658 | 0.73  | 0.5   | 2.86E-142 | 3 RNF152     |
| 3.46E-110 | 0.827456326 | 0.287 | 0.109 | 1.11E-105 | 3 COL6A2     |
| 5.34E-72  | 0.827348268 | 0.34  | 0.185 | 1.71E-67  | 3 HDAC6      |
| 3.08E-134 | 0.823898866 | 0.625 | 0.365 | 9.88E-130 | 3 CLDN10     |
| 1.76E-79  | 0.821113329 | 0.41  | 0.244 | 5.65E-75  | 3 SLC22A5    |
| 1.04E-70  | 0.81692089  | 0.475 | 0.329 | 3.33E-66  | 3 OSBPL1A    |
| 3.36E-92  | 0.813370185 | 0.343 | 0.166 | 1.08E-87  | 3 SLC12A7    |
| 7.05E-97  | 0.812882206 | 0.431 | 0.234 | 2.27E-92  | 3 CTSH       |
| 1.47E-114 | 0.811401994 | 0.358 | 0.161 | 4.72E-110 | 3 RIPOR3     |
| 6.02E-188 | 0.806475663 | 0.745 | 0.404 | 1.93E-183 | 3 SLC16A12   |
| 1.70E-76  | 0.803597372 | 0.639 | 0.536 | 5.44E-72  | 3 PAX2       |
| 9.10E-87  | 0.801190024 | 0.297 | 0.133 | 2.92E-82  | 3 DNMI       |
| 5.39E-64  | 0.800021725 | 0.328 | 0.182 | 1.73E-59  | 3 PNPLA7     |
| 2.78E-69  | 0.798656154 | 0.328 | 0.18  | 8.92E-65  | 3 CEP135     |
| 4.93E-47  | 0.798098415 | 0.403 | 0.29  | 1.58E-42  | 3 TUBGCP2    |
| 1.27E-178 | 0.798063874 | 0.273 | 0.074 | 4.09E-174 | 3 TMEM106A   |
| 6.26E-47  | 0.796520594 | 0.532 | 0.46  | 2.01E-42  | 3 GON4L      |
| 5.49E-99  | 0.794902214 | 0.37  | 0.174 | 1.76E-94  | 3 MMADHC-DT  |
| 8.60E-129 | 0.79418476  | 0.369 | 0.151 | 2.76E-124 | 3 AL136234.1 |
| 6.40E-53  | 0.792516392 | 0.62  | 0.585 | 2.06E-48  | 3 PARGP1     |
| 5.76E-61  | 0.786382914 | 0.424 | 0.294 | 1.85E-56  | 3 FMO4       |
| 1.71E-158 | 0.785596102 | 0.361 | 0.128 | 5.48E-154 | 3 GBA3       |
| 2.84E-167 | 0.784153835 | 0.284 | 0.083 | 9.14E-163 | 3 IYD        |
| 5.27E-187 | 0.78292667  | 0.251 | 0.059 | 1.69E-182 | 3 SLC22A7    |
| 2.56E-72  | 0.780335947 | 0.559 | 0.437 | 8.23E-68  | 3 AC105233.4 |
| 3.37E-134 | 0.78022222  | 0.269 | 0.087 | 1.08E-129 | 3 FRMD1      |
| 3.57E-124 | 0.778542053 | 0.262 | 0.089 | 1.15E-119 | 3 GATM       |
| 4.31E-71  | 0.777284041 | 0.53  | 0.386 | 1.39E-66  | 3 PDGFC      |
| 2.13E-68  | 0.776565921 | 0.519 | 0.37  | 6.84E-64  | 3 GLDC       |
| 7.51E-80  | 0.77551081  | 0.313 | 0.156 | 2.41E-75  | 3 PGPEP1     |
| 1.06E-53  | 0.76988299  | 0.378 | 0.255 | 3.40E-49  | 3 CYP4V2     |
| 1.55E-72  | 0.769575874 | 0.456 | 0.289 | 4.99E-68  | 3 BNIP3L     |
| 9.05E-107 | 0.768199637 | 0.271 | 0.101 | 2.91E-102 | 3 ESPN       |
| 3.62E-68  | 0.765375153 | 0.399 | 0.255 | 1.16E-63  | 3 PBLD       |
| 4.27E-203 | 0.765314265 | 0.965 | 0.911 | 1.37E-198 | 3 GPHN       |
| 2.38E-56  | 0.76469198  | 0.572 | 0.483 | 7.66E-52  | 3 CCDC30     |
| 3.17E-44  | 0.761182988 | 0.448 | 0.356 | 1.02E-39  | 3 TTC21B     |
| 2.81E-56  | 0.760628525 | 0.459 | 0.336 | 9.04E-52  | 3 EPHX2      |
| 4.27E-118 | 0.760119557 | 0.266 | 0.093 | 1.37E-113 | 3 SORD       |
| 1.50E-52  | 0.758208865 | 0.53  | 0.447 | 4.80E-48  | 3 PUM3       |
| 1.14E-127 | 0.75697381  | 0.307 | 0.113 | 3.66E-123 | 3 USH1C      |
| 2.94E-161 | 0.756748908 | 0.251 | 0.069 | 9.44E-157 | 3 ALAD       |
| 1.77E-56  | 0.752940028 | 0.256 | 0.131 | 5.68E-52  | 3 CFAP299    |



|           |             |       |       |           |               |
|-----------|-------------|-------|-------|-----------|---------------|
| 7.48E-52  | 0.752606982 | 0.406 | 0.292 | 2.40E-47  | 3 GPR89A      |
| 6.19E-60  | 0.752176689 | 0.515 | 0.402 | 1.99E-55  | 3 MTRF1       |
| 4.73E-77  | 0.750086667 | 0.264 | 0.116 | 1.52E-72  | 3 NAV3        |
| 1.39E-76  | 0.74993328  | 0.351 | 0.188 | 4.47E-72  | 3 LRIG3       |
| 9.89E-58  | 0.74981109  | 0.528 | 0.422 | 3.18E-53  | 3 AC093423.3  |
| 2.63E-124 | 0.74691173  | 0.489 | 0.245 | 8.44E-120 | 3 ARHGAP10    |
| 3.31E-149 | 0.741137961 | 0.289 | 0.092 | 1.06E-144 | 3 TFEC        |
| 1.61E-65  | 0.740905374 | 0.396 | 0.244 | 5.18E-61  | 3 TRPV4       |
| 7.53E-73  | 0.738680067 | 0.289 | 0.142 | 2.42E-68  | 3 ENPP7P7     |
| 2.28E-142 | 0.735310046 | 0.674 | 0.409 | 7.32E-138 | 3 GPC6        |
| 5.79E-130 | 0.734306819 | 0.808 | 0.786 | 1.86E-125 | 3 NPIPB3      |
| 1.02E-51  | 0.733787112 | 0.498 | 0.407 | 3.27E-47  | 3 PPP1R21     |
| 3.02E-64  | 0.730697715 | 0.376 | 0.226 | 9.69E-60  | 3 NR1H4       |
| 8.22E-45  | 0.729695141 | 0.637 | 0.615 | 2.64E-40  | 3 PARG        |
| 6.12E-106 | 0.726548068 | 0.377 | 0.174 | 1.96E-101 | 3 ABI3BP      |
| 2.60E-46  | 0.726073232 | 0.388 | 0.266 | 8.35E-42  | 3 CDK10       |
| 5.70E-74  | 0.721756818 | 0.405 | 0.228 | 1.83E-69  | 3 KCNMB2      |
| 1.22E-109 | 0.721586396 | 0.261 | 0.095 | 3.91E-105 | 3 SCN8A       |
| 9.86E-81  | 0.718958962 | 0.709 | 0.647 | 3.17E-76  | 3 EHP1        |
| 7.96E-139 | 0.717531536 | 0.266 | 0.083 | 2.56E-134 | 3 ADORA2A-AS1 |
| 5.63E-74  | 0.717277466 | 0.337 | 0.177 | 1.81E-69  | 3 ABAT        |
| 4.54E-74  | 0.716428475 | 0.355 | 0.188 | 1.46E-69  | 3 LINC01788   |
| 5.17E-112 | 0.715226278 | 0.267 | 0.095 | 1.66E-107 | 3 ZYG11A      |
| 1.26E-44  | 0.713949124 | 0.486 | 0.393 | 4.06E-40  | 3 ACAD11      |
| 8.51E-49  | 0.711114578 | 0.331 | 0.209 | 2.73E-44  | 3 ENTPD5      |
| 2.82E-54  | 0.711097247 | 0.322 | 0.191 | 9.04E-50  | 3 BBOF1       |
| 2.67E-33  | 0.70830406  | 0.322 | 0.227 | 8.56E-29  | 3 MST1        |
| 1.01E-50  | 0.704940869 | 0.301 | 0.178 | 3.24E-46  | 3 POLD3       |
| 5.44E-36  | 0.704442031 | 0.457 | 0.372 | 1.75E-31  | 3 WASH7P      |
| 1.44E-38  | 0.701397767 | 0.583 | 0.557 | 4.64E-34  | 3 ZNF91       |
| 3.67E-108 | 0.699440499 | 0.62  | 0.379 | 1.18E-103 | 3 CNTN4       |
| 3.31E-103 | 0.697881724 | 0.766 | 0.678 | 1.06E-98  | 3 PLXDC2      |
| 1.05E-63  | 0.695590981 | 0.287 | 0.149 | 3.37E-59  | 3 GPR135      |
| 2.83E-73  | 0.693959722 | 0.304 | 0.153 | 9.09E-69  | 3 PDZK1P1     |
| 1.10E-56  | 0.693953216 | 0.623 | 0.588 | 3.52E-52  | 3 HIBCH       |
| 5.49E-54  | 0.693056711 | 0.376 | 0.241 | 1.76E-49  | 3 CERS4       |
| 1.92E-42  | 0.691567795 | 0.304 | 0.193 | 6.16E-38  | 3 NIT2        |
| 2.43E-38  | 0.691433481 | 0.374 | 0.271 | 7.82E-34  | 3 RFFL        |
| 2.10E-72  | 0.691411207 | 0.357 | 0.195 | 6.75E-68  | 3 PXYLP1      |
| 1.95E-65  | 0.690736868 | 0.321 | 0.176 | 6.25E-61  | 3 ERBB3       |
| 4.83E-25  | 0.688413039 | 0.349 | 0.276 | 1.55E-20  | 3 CLUH        |
| 1.07E-44  | 0.686817535 | 0.32  | 0.2   | 3.45E-40  | 3 MEI4        |
| 5.11E-42  | 0.685012499 | 0.271 | 0.162 | 1.64E-37  | 3 ASPSCR1     |
| 1.33E-139 | 0.679588596 | 0.838 | 0.738 | 4.29E-135 | 3 WDR72       |
| 1.75E-107 | 0.678465664 | 0.781 | 0.77  | 5.61E-103 | 3 NPIPB4      |
| 1.22E-76  | 0.677815566 | 0.264 | 0.115 | 3.93E-72  | 3 C4B         |
| 1.44E-37  | 0.675526373 | 0.569 | 0.529 | 4.62E-33  | 3 DHRSX       |
| 6.75E-49  | 0.673554579 | 0.252 | 0.135 | 2.17E-44  | 3 OCIAD2      |
| 1.81E-122 | 0.672862015 | 0.262 | 0.089 | 5.82E-118 | 3 CNTNAP3C    |
| 5.72E-34  | 0.672834102 | 0.377 | 0.281 | 1.84E-29  | 3 DIXDC1      |
| 3.70E-74  | 0.672785045 | 0.395 | 0.225 | 1.19E-69  | 3 PAPLN       |

|           |             |       |       |           |                 |
|-----------|-------------|-------|-------|-----------|-----------------|
| 1.99E-46  | 0.672412362 | 0.53  | 0.424 | 6.39E-42  | 3 AL390334.1    |
| 2.30E-45  | 0.672202524 | 0.584 | 0.528 | 7.39E-41  | 3 SNRNP70       |
| 1.81E-46  | 0.670450046 | 0.596 | 0.57  | 5.81E-42  | 3 TAF1D         |
| 5.98E-44  | 0.669813168 | 0.584 | 0.562 | 1.92E-39  | 3 ECHDC2        |
| 1.58E-28  | 0.669772166 | 0.399 | 0.322 | 5.08E-24  | 3 GAK           |
| 8.14E-50  | 0.666075195 | 0.382 | 0.251 | 2.62E-45  | 3 CNTN3         |
| 2.31E-84  | 0.665219161 | 0.288 | 0.126 | 7.43E-80  | 3 GRIA3         |
| 7.69E-122 | 0.664647378 | 0.255 | 0.083 | 2.47E-117 | 3 UGT2A3        |
| 8.94E-34  | 0.664594873 | 0.307 | 0.209 | 2.87E-29  | 3 LINC00571     |
| 7.04E-39  | 0.663422628 | 0.566 | 0.53  | 2.26E-34  | 3 LARP4         |
| 2.45E-62  | 0.663069963 | 0.32  | 0.174 | 7.87E-58  | 3 MAOB          |
| 8.63E-53  | 0.662650242 | 0.287 | 0.16  | 2.77E-48  | 3 SRP54-AS1     |
| 4.76E-27  | 0.661909057 | 0.375 | 0.298 | 1.53E-22  | 3 WASHC1        |
| 2.84E-42  | 0.659300269 | 0.416 | 0.302 | 9.13E-38  | 3 AC126283.2    |
| 9.87E-71  | 0.656484144 | 0.262 | 0.123 | 3.17E-66  | 3 IDH1          |
| 2.24E-81  | 0.65629399  | 0.311 | 0.144 | 7.18E-77  | 3 PHYHIPL       |
| 7.61E-22  | 0.656237502 | 0.383 | 0.323 | 2.44E-17  | 3 SPEF2         |
| 2.40E-24  | 0.654875184 | 0.251 | 0.165 | 7.70E-20  | 3 CDH20         |
| 1.95E-35  | 0.654769562 | 0.448 | 0.357 | 6.27E-31  | 3 PLCG1         |
| 6.47E-43  | 0.653473435 | 0.433 | 0.328 | 2.08E-38  | 3 CYB5A         |
| 4.04E-128 | 0.652125375 | 0.28  | 0.095 | 1.30E-123 | 3 ENPP2         |
| 5.61E-51  | 0.649600678 | 0.263 | 0.141 | 1.80E-46  | 3 AC127526.2    |
| 7.41E-105 | 0.649496054 | 0.354 | 0.15  | 2.38E-100 | 3 PPP1R16B      |
| 1.45E-72  | 0.649260585 | 0.274 | 0.129 | 4.65E-68  | 3 DPF3          |
| 5.16E-61  | 0.647660242 | 0.699 | 0.699 | 1.66E-56  | 3 REV3L         |
| 1.69E-42  | 0.646808445 | 0.611 | 0.594 | 5.42E-38  | 3 LYPLAL1       |
| 8.94E-83  | 0.645140673 | 0.299 | 0.135 | 2.87E-78  | 3 SH3BP2        |
| 2.08E-54  | 0.644812588 | 0.486 | 0.357 | 6.68E-50  | 3 PLEKHA6       |
| 2.96E-45  | 0.643634648 | 0.27  | 0.156 | 9.50E-41  | 3 GOLGA2P5      |
| 1.99E-97  | 0.643286128 | 0.293 | 0.121 | 6.39E-93  | 3 BX005040.4    |
| 4.87E-33  | 0.642394687 | 0.304 | 0.206 | 1.57E-28  | 3 SNTB2         |
| 1.05E-36  | 0.641779789 | 0.337 | 0.231 | 3.38E-32  | 3 MACROD1       |
| 4.25E-53  | 0.641256883 | 0.322 | 0.191 | 1.37E-48  | 3 HOGA1         |
| 2.21E-56  | 0.639977588 | 0.34  | 0.197 | 7.09E-52  | 3 TNFRSF21      |
| 1.25E-24  | 0.635772657 | 0.367 | 0.298 | 4.02E-20  | 3 ZNF75D        |
| 1.38E-91  | 0.633701232 | 0.292 | 0.123 | 4.44E-87  | 3 HNF4G         |
| 5.86E-60  | 0.632048532 | 0.672 | 0.633 | 1.88E-55  | 3 SORBS2        |
| 3.34E-58  | 0.630497813 | 0.384 | 0.234 | 1.07E-53  | 3 ACO1          |
| 2.58E-34  | 0.630188235 | 0.366 | 0.26  | 8.28E-30  | 3 CRYZL2P-SEC10 |
| 2.88E-37  | 0.629690621 | 0.578 | 0.527 | 9.25E-33  | 3 ANKRD26       |
| 7.69E-47  | 0.629259288 | 0.314 | 0.191 | 2.47E-42  | 3 LRP5          |
| 1.31E-49  | 0.629206532 | 0.71  | 0.706 | 4.20E-45  | 3 SON           |
| 2.59E-42  | 0.628847631 | 0.595 | 0.554 | 8.32E-38  | 3 AIG1          |
| 1.30E-22  | 0.626028377 | 0.313 | 0.237 | 4.17E-18  | 3 AGBL3         |
| 3.62E-73  | 0.624536501 | 0.252 | 0.111 | 1.16E-68  | 3 TTYH3         |
| 2.72E-33  | 0.621814404 | 0.426 | 0.332 | 8.74E-29  | 3 KIF21A        |
| 2.45E-39  | 0.621072578 | 0.301 | 0.19  | 7.86E-35  | 3 SLC15A2       |
| 1.62E-22  | 0.616554397 | 0.428 | 0.383 | 5.19E-18  | 3 PDZD8         |
| 5.15E-30  | 0.614632785 | 0.496 | 0.455 | 1.65E-25  | 3 MSH3          |
| 3.34E-40  | 0.611905546 | 0.26  | 0.153 | 1.07E-35  | 3 DDX56         |
| 1.16E-100 | 0.610932869 | 0.569 | 0.359 | 3.74E-96  | 3 CHRM3         |

|           |             |       |       |           |              |
|-----------|-------------|-------|-------|-----------|--------------|
| 1.08E-35  | 0.608906418 | 0.611 | 0.597 | 3.48E-31  | 3 ENOSF1     |
| 4.27E-38  | 0.608855333 | 0.417 | 0.309 | 1.37E-33  | 3 ADCY9      |
| 2.04E-59  | 0.607707509 | 0.268 | 0.137 | 6.56E-55  | 3 HDHD3      |
| 1.26E-21  | 0.607195901 | 0.407 | 0.354 | 4.04E-17  | 3 ATP6V0A1   |
| 2.58E-83  | 0.6071931   | 0.755 | 0.773 | 8.28E-79  | 3 NPIP5      |
| 1.87E-74  | 0.605518166 | 0.724 | 0.639 | 6.01E-70  | 3 TTC28      |
| 6.67E-26  | 0.60485558  | 0.495 | 0.456 | 2.14E-21  | 3 AC009120.2 |
| 2.59E-17  | 0.603275622 | 0.504 | 0.498 | 8.32E-13  | 3 DYNC2I1    |
| 2.06E-24  | 0.599980016 | 0.346 | 0.27  | 6.62E-20  | 3 UTP4       |
| 1.13E-82  | 0.599630813 | 0.792 | 0.703 | 3.64E-78  | 3 UBE2E2     |
| 8.97E-23  | 0.597945013 | 0.348 | 0.277 | 2.88E-18  | 3 SELENOO    |
| 2.70E-48  | 0.595878928 | 0.661 | 0.638 | 8.66E-44  | 3 TNS3       |
| 6.01E-17  | 0.594029256 | 0.43  | 0.41  | 1.93E-12  | 3 HERC2P3    |
| 4.99E-107 | 0.59291956  | 0.252 | 0.085 | 1.60E-102 | 3 AL162725.2 |
| 1.49E-49  | 0.5911596   | 0.265 | 0.144 | 4.77E-45  | 3 NABP1      |
| 6.32E-70  | 0.591094896 | 0.26  | 0.118 | 2.03E-65  | 3 GPT2       |
| 9.36E-30  | 0.587598873 | 0.295 | 0.201 | 3.01E-25  | 3 SEMA3B     |
| 4.62E-60  | 0.58628743  | 0.48  | 0.316 | 1.48E-55  | 3 LDLRAD4    |
| 2.10E-27  | 0.58579609  | 0.358 | 0.273 | 6.75E-23  | 3 EVC        |
| 2.18E-36  | 0.585056152 | 0.496 | 0.411 | 6.99E-32  | 3 SPATS2L    |
| 2.06E-68  | 0.584798272 | 0.497 | 0.309 | 6.62E-64  | 3 NRP1       |
| 5.34E-37  | 0.583437683 | 0.358 | 0.25  | 1.72E-32  | 3 EVA1A      |
| 1.34E-23  | 0.582408887 | 0.471 | 0.435 | 4.31E-19  | 3 LARP1      |
| 2.03E-38  | 0.577081324 | 0.437 | 0.333 | 6.52E-34  | 3 FREM2      |
| 1.45E-21  | 0.576743202 | 0.336 | 0.264 | 4.67E-17  | 3 MYO15B     |
| 4.20E-77  | 0.576443174 | 0.36  | 0.178 | 1.35E-72  | 3 FOXP2      |
| 1.10E-56  | 0.575591579 | 0.708 | 0.615 | 3.54E-52  | 3 STPG2      |
| 2.72E-41  | 0.574803886 | 0.271 | 0.162 | 8.74E-37  | 3 MFSD4B     |
| 2.38E-30  | 0.573312735 | 0.426 | 0.343 | 7.66E-26  | 3 PDE7A      |
| 2.05E-22  | 0.571447878 | 0.561 | 0.565 | 6.57E-18  | 3 PHF3       |
| 2.54E-24  | 0.569335992 | 0.517 | 0.478 | 8.17E-20  | 3 COL18A1    |
| 3.70E-16  | 0.568747832 | 0.508 | 0.536 | 1.19E-11  | 3 MFSD14C    |
| 1.44E-21  | 0.566948317 | 0.302 | 0.228 | 4.61E-17  | 3 SNHG25     |
| 1.37E-38  | 0.566796386 | 0.276 | 0.17  | 4.41E-34  | 3 HADH       |
| 1.42E-20  | 0.56369975  | 0.31  | 0.24  | 4.57E-16  | 3 SLC38A10   |
| 1.71E-27  | 0.563202972 | 0.581 | 0.574 | 5.49E-23  | 3 AC008695.1 |
| 3.17E-31  | 0.562639118 | 0.255 | 0.16  | 1.02E-26  | 3 PPP1R16A   |
| 2.72E-27  | 0.562294345 | 0.422 | 0.346 | 8.72E-23  | 3 ABHD15-AS1 |
| 6.55E-33  | 0.562239658 | 0.298 | 0.2   | 2.11E-28  | 3 CAMK2G     |
| 3.61E-49  | 0.559898771 | 0.444 | 0.294 | 1.16E-44  | 3 ALCAM      |
| 5.49E-21  | 0.559000558 | 0.533 | 0.549 | 1.76E-16  | 3 SMARCC1    |
| 1.22E-70  | 0.556978746 | 0.748 | 0.745 | 3.92E-66  | 3 WDFY3      |
| 4.41E-21  | 0.555722296 | 0.331 | 0.259 | 1.42E-16  | 3 MAST2      |
| 5.84E-30  | 0.555202431 | 0.378 | 0.287 | 1.88E-25  | 3 MALT1      |
| 1.74E-29  | 0.554489395 | 0.329 | 0.24  | 5.58E-25  | 3 MTHFS      |
| 3.96E-16  | 0.552689763 | 0.41  | 0.381 | 1.27E-11  | 3 NPLOC4     |
| 2.52E-45  | 0.55263459  | 0.652 | 0.633 | 8.10E-41  | 3 ARHGEF28   |
| 1.18E-81  | 0.552435971 | 0.305 | 0.137 | 3.80E-77  | 3 EPHA7      |
| 6.29E-33  | 0.55080192  | 0.492 | 0.406 | 2.02E-28  | 3 ASTN2      |
| 3.51E-29  | 0.546109529 | 0.463 | 0.39  | 1.13E-24  | 3 SLC3A1     |
| 4.85E-68  | 0.544402567 | 0.769 | 0.778 | 1.56E-63  | 3 CUX1       |

|          |             |       |       |             |               |
|----------|-------------|-------|-------|-------------|---------------|
| 8.21E-39 | 0.544231527 | 0.317 | 0.202 | 2.64E-34    | 3 BAIAP2      |
| 9.08E-08 | 0.543344496 | 0.276 | 0.254 | 0.002917722 | 3 BIRC2       |
| 1.18E-32 | 0.541445967 | 0.507 | 0.415 | 3.78E-28    | 3 GHR         |
| 1.72E-36 | 0.540963728 | 0.26  | 0.157 | 5.52E-32    | 3 RGN         |
| 3.12E-21 | 0.538809007 | 0.489 | 0.477 | 1.00E-16    | 3 ADD1        |
| 2.68E-22 | 0.538584379 | 0.413 | 0.336 | 8.62E-18    | 3 AC034195.1  |
| 5.75E-05 | 0.53662183  | 0.346 | 0.351 | 1           | 3 IL3RA       |
| 6.34E-29 | 0.535257477 | 0.279 | 0.184 | 2.04E-24    | 3 MPP6        |
| 1.65E-28 | 0.532608871 | 0.335 | 0.232 | 5.29E-24    | 3 C1QTNF7-AS1 |
| 2.08E-19 | 0.532017572 | 0.308 | 0.239 | 6.67E-15    | 3 AC092902.4  |
| 3.26E-18 | 0.531985807 | 0.378 | 0.327 | 1.05E-13    | 3 NFATC3      |
| 1.18E-19 | 0.53160633  | 0.483 | 0.431 | 3.79E-15    | 3 KIAA0825    |
| 1.03E-59 | 0.528800022 | 0.348 | 0.192 | 3.31E-55    | 3 FIGN        |
| 3.69E-10 | 0.527369529 | 0.263 | 0.224 | 1.19E-05    | 3 BIVM-ERCC5  |
| 1.96E-29 | 0.526938695 | 0.416 | 0.316 | 6.30E-25    | 3 AC104123.1  |
| 1.90E-35 | 0.526097443 | 0.41  | 0.303 | 6.09E-31    | 3 PALM2AKAP2  |
| 2.63E-18 | 0.52156725  | 0.522 | 0.53  | 8.46E-14    | 3 IFT88       |
| 5.54E-14 | 0.520150863 | 0.256 | 0.203 | 1.78E-09    | 3 SUPT5H      |
| 3.88E-22 | 0.519983515 | 0.536 | 0.528 | 1.25E-17    | 3 FANCC       |
| 1.07E-56 | 0.519014314 | 0.637 | 0.51  | 3.44E-52    | 3 NFIA        |
| 1.74E-20 | 0.518359714 | 0.278 | 0.206 | 5.58E-16    | 3 ALDH7A1     |
| 3.77E-15 | 0.517977785 | 0.49  | 0.489 | 1.21E-10    | 3 SHLD2       |
| 7.63E-17 | 0.51660354  | 0.466 | 0.441 | 2.45E-12    | 3 AF127577.4  |
| 3.87E-17 | 0.514395893 | 0.299 | 0.241 | 1.24E-12    | 3 DNAJC16     |
| 1.29E-19 | 0.514225662 | 0.509 | 0.496 | 4.15E-15    | 3 ATXN7L1     |
| 3.46E-14 | 0.513838703 | 0.36  | 0.326 | 1.11E-09    | 3 SFXN1       |
| 1.96E-06 | 0.510618471 | 0.295 | 0.275 | 0.062852775 | 3 ZNF737      |
| 3.09E-27 | 0.510027343 | 0.357 | 0.264 | 9.94E-23    | 3 SH3GL2      |
| 1.37E-11 | 0.509994778 | 0.339 | 0.309 | 4.39E-07    | 3 ACADM       |
| 3.32E-21 | 0.508692779 | 0.413 | 0.345 | 1.07E-16    | 3 SLC16A10    |
| 6.97E-24 | 0.508331865 | 0.283 | 0.2   | 2.24E-19    | 3 HAGH        |
| 2.47E-10 | 0.507849484 | 0.37  | 0.351 | 7.93E-06    | 3 PCBP1-AS1   |
| 3.56E-07 | 0.507077152 | 0.475 | 0.503 | 0.01144871  | 3 ZMAT1       |
| 8.21E-20 | 0.506359334 | 0.61  | 0.651 | 2.64E-15    | 3 AC007000.3  |
| 2.05E-09 | 0.506263343 | 0.47  | 0.488 | 6.58E-05    | 3 AP2A2       |
| 2.57E-19 | 0.50508896  | 0.272 | 0.201 | 8.25E-15    | 3 USP2        |
| 3.50E-31 | 0.504771361 | 0.25  | 0.153 | 1.12E-26    | 3 MGST1       |
| 1.79E-11 | 0.504750244 | 0.527 | 0.548 | 5.74E-07    | 3 CPLANE1     |
| 1.05E-21 | 0.502554931 | 0.542 | 0.534 | 3.38E-17    | 3 NINL        |
| 5.26E-22 | 0.502113424 | 0.254 | 0.178 | 1.69E-17    | 3 AC141586.1  |
| 4.95E-19 | 0.499474786 | 0.254 | 0.186 | 1.59E-14    | 3 SLC2A11     |
| 3.82E-17 | 0.498024936 | 0.405 | 0.347 | 1.23E-12    | 3 CRPPA       |
| 1.72E-07 | 0.497628701 | 0.42  | 0.429 | 0.005525659 | 3 ACADVL      |
| 8.88E-05 | 0.496949658 | 0.413 | 0.444 | 1           | 3 TRIP11      |
| 1.48E-50 | 0.492760846 | 0.29  | 0.156 | 4.74E-46    | 3 B3GAT1-DT   |
| 3.84E-40 | 0.492399047 | 0.545 | 0.429 | 1.23E-35    | 3 KCNJ3       |
| 3.67E-23 | 0.491207253 | 0.6   | 0.631 | 1.18E-18    | 3 GLG1        |
| 2.73E-68 | 0.490867572 | 0.33  | 0.162 | 8.77E-64    | 3 PCK1        |
| 6.06E-11 | 0.486900699 | 0.348 | 0.321 | 1.95E-06    | 3 ATG4B       |
| 4.75E-29 | 0.484681526 | 0.598 | 0.539 | 1.53E-24    | 3 PCAT1       |
| 3.55E-15 | 0.483085883 | 0.478 | 0.455 | 1.14E-10    | 3 ARHGEF10L   |

|            |             |       |       |             |              |
|------------|-------------|-------|-------|-------------|--------------|
| 1.70E-51   | 0.481873341 | 0.537 | 0.401 | 5.47E-47    | 3 GRB10      |
| 4.25E-06   | 0.476938812 | 0.401 | 0.422 | 0.136505874 | 3 NPIPB11    |
| 5.26E-101  | 0.475187066 | 0.973 | 0.918 | 1.69E-96    | 3 FHIT       |
| 8.38E-19   | 0.473153607 | 0.297 | 0.229 | 2.69E-14    | 3 RASSF8-AS1 |
| 6.30E-11   | 0.472575718 | 0.343 | 0.314 | 2.02E-06    | 3 PDPK1      |
| 1.53E-17   | 0.471391573 | 0.478 | 0.449 | 4.92E-13    | 3 SLC39A11   |
| 1.16E-88   | 0.471380979 | 0.778 | 0.726 | 3.74E-84    | 3 DIP2C      |
| 3.45E-23   | 0.471147583 | 0.663 | 0.693 | 1.11E-18    | 3 JPX        |
| 1.22E-55   | 0.470860285 | 0.391 | 0.231 | 3.91E-51    | 3 ARHGAP42   |
| 2.26E-13   | 0.470534196 | 0.274 | 0.223 | 7.27E-09    | 3 CNDP2      |
| 2.26E-17   | 0.469576653 | 0.55  | 0.556 | 7.26E-13    | 3 ADD3       |
| 4.65E-14   | 0.469110999 | 0.331 | 0.283 | 1.49E-09    | 3 GLCE       |
| 1.23E-08   | 0.467842712 | 0.447 | 0.459 | 0.000395434 | 3 AC079781.5 |
| 2.10E-21   | 0.467385721 | 0.646 | 0.686 | 6.76E-17    | 3 ANKHD1     |
| 1.40E-09   | 0.464222135 | 0.36  | 0.343 | 4.51E-05    | 3 ERI3       |
| 2.29E-24   | 0.461455904 | 0.41  | 0.325 | 7.36E-20    | 3 SLC22A23   |
| 1.10E-49   | 0.46046532  | 0.815 | 0.831 | 3.54E-45    | 3 CHD9       |
| 4.22E-26   | 0.459484831 | 0.446 | 0.367 | 1.36E-21    | 3 DLEU2      |
| 8.96E-23   | 0.457330351 | 0.346 | 0.256 | 2.88E-18    | 3 PDE3B      |
| 9.60E-12   | 0.457295705 | 0.274 | 0.229 | 3.08E-07    | 3 PFKFB2     |
| 9.29E-58   | 0.456517742 | 0.404 | 0.245 | 2.98E-53    | 3 TGFBR3     |
| 4.95E-07   | 0.454455277 | 0.324 | 0.307 | 0.015891812 | 3 WASH9P     |
| 3.33E-47   | 0.451224359 | 0.368 | 0.224 | 1.07E-42    | 3 CLIC4      |
| 3.84E-09   | 0.450716565 | 0.447 | 0.447 | 0.000123435 | 3 RFX7       |
| 1.23E-17   | 0.449991826 | 0.436 | 0.377 | 3.94E-13    | 3 LRRK2      |
| 2.99E-15   | 0.447688208 | 0.373 | 0.32  | 9.60E-11    | 3 RASGRF2    |
| 2.89E-19   | 0.447279098 | 0.58  | 0.585 | 9.28E-15    | 3 TFDP2      |
| 0.00072989 | 0.447100071 | 0.38  | 0.408 | 1           | 3 WASH3P     |
| 2.28E-13   | 0.446244714 | 0.502 | 0.505 | 7.32E-09    | 3 OSBPL8     |
| 1.98E-17   | 0.443761332 | 0.545 | 0.547 | 6.37E-13    | 3 CMIP       |
| 1.36E-07   | 0.441599053 | 0.365 | 0.355 | 0.004365374 | 3 SCP2       |
| 3.53E-09   | 0.439099268 | 0.316 | 0.288 | 0.000113407 | 3 L2HGDH     |
| 6.03E-05   | 0.439049933 | 0.304 | 0.294 | 1           | 3 PFKL       |
| 5.30E-15   | 0.438949231 | 0.583 | 0.627 | 1.70E-10    | 3 TSPAN9     |
| 8.45E-09   | 0.438121955 | 0.466 | 0.49  | 0.000271472 | 3 SGK3       |
| 1.85E-57   | 0.437584293 | 0.414 | 0.249 | 5.94E-53    | 3 TNIK       |
| 3.67E-09   | 0.435664946 | 0.392 | 0.386 | 0.00011794  | 3 ACVR1      |
| 0.0045023  | 0.434989016 | 0.372 | 0.401 | 1           | 3 BOD1L1     |
| 4.69E-12   | 0.43471919  | 0.345 | 0.307 | 1.51E-07    | 3 C1GALT1    |
| 2.98E-25   | 0.433150004 | 0.281 | 0.191 | 9.58E-21    | 3 GPR155     |
| 6.31E-34   | 0.432927185 | 0.352 | 0.233 | 2.03E-29    | 3 LINGO2     |
| 3.32E-13   | 0.431271637 | 0.292 | 0.239 | 1.06E-08    | 3 PANK1      |
| 7.31E-05   | 0.43033367  | 0.403 | 0.429 | 1           | 3 DDX46      |
| 2.65E-16   | 0.429850704 | 0.286 | 0.217 | 8.52E-12    | 3 ST3GAL1    |
| 0.00011744 | 0.429680581 | 0.327 | 0.323 | 1           | 3 RSU1       |
| 1.88E-06   | 0.429458098 | 0.306 | 0.283 | 0.060418549 | 3 ANKDD1A    |
| 5.28E-08   | 0.42887781  | 0.311 | 0.284 | 0.001696366 | 3 TRMT11     |
| 4.16E-10   | 0.428224129 | 0.27  | 0.223 | 1.34E-05    | 3 MAN1C1     |
| 8.04E-08   | 0.426727861 | 0.358 | 0.348 | 0.002581027 | 3 ZKSCAN1    |
| 0.00011353 | 0.42658331  | 0.351 | 0.356 | 1           | 3 KANTR      |
| 2.05E-74   | 0.426014661 | 0.455 | 0.267 | 6.57E-70    | 3 CALD1      |

|            |             |       |       |             |              |
|------------|-------------|-------|-------|-------------|--------------|
| 4.00E-05   | 0.423484906 | 0.523 | 0.585 | 1           | 3 ZC3H11A    |
| 3.74E-23   | 0.417428342 | 0.508 | 0.444 | 1.20E-18    | 3 FAT1       |
| 3.57E-05   | 0.417303909 | 0.402 | 0.424 | 1           | 3 WDR59      |
| 3.07E-10   | 0.416941141 | 0.431 | 0.423 | 9.86E-06    | 3 GSE1       |
| 1.36E-08   | 0.415191312 | 0.27  | 0.232 | 0.000436849 | 3 MREG       |
| 1.07E-40   | 0.414805139 | 0.67  | 0.559 | 3.45E-36    | 3 DST        |
| 3.02E-11   | 0.414218738 | 0.434 | 0.413 | 9.71E-07    | 3 TPD52      |
| 7.38E-09   | 0.413234212 | 0.42  | 0.408 | 0.000236958 | 3 LINC01376  |
| 1.28E-32   | 0.413118858 | 0.53  | 0.436 | 4.10E-28    | 3 NCOA7      |
| 9.56E-12   | 0.412882788 | 0.394 | 0.359 | 3.07E-07    | 3 TTC39B     |
| 4.24E-06   | 0.408594997 | 0.286 | 0.266 | 0.13605528  | 3 ZNF251     |
| 6.21E-11   | 0.408568608 | 0.253 | 0.206 | 2.00E-06    | 3 PECR       |
| 2.40E-20   | 0.407570663 | 0.335 | 0.251 | 7.71E-16    | 3 EYA2       |
| 7.77E-22   | 0.405978893 | 0.292 | 0.211 | 2.50E-17    | 3 GPR137B    |
| 1.83E-11   | 0.405512598 | 0.669 | 0.744 | 5.87E-07    | 3 LUC7L3     |
| 9.89E-10   | 0.40502436  | 0.49  | 0.487 | 3.18E-05    | 3 RAI14      |
| 2.48E-08   | 0.4034154   | 0.414 | 0.401 | 0.000796538 | 3 ACSS3      |
| 3.72E-18   | 0.403364555 | 0.301 | 0.227 | 1.19E-13    | 3 AC010894.2 |
| 8.40E-09   | 0.403101436 | 0.628 | 0.7   | 0.000269782 | 3 BPTF       |
| 7.46E-15   | 0.402924356 | 0.336 | 0.279 | 2.40E-10    | 3 PTGR1      |
| 2.22E-14   | 0.400183819 | 0.583 | 0.599 | 7.12E-10    | 3 NBEA       |
| 5.52E-07   | 0.400148733 | 0.272 | 0.246 | 0.017718475 | 3 TRIP4      |
| 2.72E-11   | 0.39755797  | 0.545 | 0.547 | 8.73E-07    | 3 PELI2      |
| 1.01E-05   | 0.397290726 | 0.316 | 0.305 | 0.324643823 | 3 ZER1       |
| 2.26E-28   | 0.396864686 | 0.523 | 0.43  | 7.27E-24    | 3 BICDL1     |
| 7.96E-14   | 0.3951932   | 0.554 | 0.567 | 2.56E-09    | 3 FNIP2      |
| 1.37E-07   | 0.394455757 | 0.283 | 0.242 | 0.004385483 | 3 PPP2R2B    |
| 4.14E-08   | 0.392379718 | 0.557 | 0.614 | 0.001329848 | 3 WDPCP      |
| 6.39E-05   | 0.392284104 | 0.511 | 0.569 | 1           | 3 KIAA2026   |
| 0.00016425 | 0.391796687 | 0.478 | 0.544 | 1           | 3 LRRC37A3   |
| 2.10E-06   | 0.391278165 | 0.402 | 0.406 | 0.067294682 | 3 OGDHL      |
| 5.68E-16   | 0.390870207 | 0.367 | 0.303 | 1.82E-11    | 3 NR3C1      |
| 7.57E-10   | 0.390498443 | 0.401 | 0.378 | 2.43E-05    | 3 CDKL1      |
| 0.00250959 | 0.3900582   | 0.33  | 0.342 | 1           | 3 ARID4A     |
| 1.38E-11   | 0.389972039 | 0.524 | 0.53  | 4.44E-07    | 3 ARHGAP32   |
| 1.59E-05   | 0.389390092 | 0.252 | 0.23  | 0.51149516  | 3 PRKCZ      |
| 2.95E-11   | 0.388752221 | 0.35  | 0.303 | 9.48E-07    | 3 ZNF462     |
| 6.05E-11   | 0.386035694 | 0.526 | 0.549 | 1.94E-06    | 3 KIAA1958   |
| 0.00014883 | 0.384204812 | 0.393 | 0.405 | 1           | 3 LARP1B     |
| 2.99E-47   | 0.383366102 | 0.827 | 0.843 | 9.61E-43    | 3 RABGAP1L   |
| 4.01E-09   | 0.381302522 | 0.385 | 0.366 | 0.000128824 | 3 ENPP7P6    |
| 6.93E-08   | 0.380802589 | 0.519 | 0.543 | 0.002225702 | 3 INVS       |
| 1.22E-23   | 0.380072222 | 0.58  | 0.502 | 3.92E-19    | 3 LRP1B      |
| 0.00298073 | 0.379251849 | 0.411 | 0.438 | 1           | 3 CWF19L2    |
| 2.62E-22   | 0.378923374 | 0.672 | 0.678 | 8.42E-18    | 3 PLEKHA7    |
| 2.83E-06   | 0.378364926 | 0.511 | 0.558 | 0.09074634  | 3 ANKIB1     |
| 0.00531929 | 0.377056699 | 0.366 | 0.392 | 1           | 3 SMG1P4     |
| 5.89E-05   | 0.375439833 | 0.412 | 0.441 | 1           | 3 SETD3      |
| 1.11E-06   | 0.373996703 | 0.399 | 0.405 | 0.035712935 | 3 STX7       |
| 4.26E-07   | 0.373608234 | 0.29  | 0.26  | 0.013674966 | 3 NCEH1      |
| 4.33E-10   | 0.371456639 | 0.637 | 0.702 | 1.39E-05    | 3 SETD2      |

|            |             |       |       |             |                 |
|------------|-------------|-------|-------|-------------|-----------------|
| 2.03E-21   | 0.371155889 | 0.707 | 0.773 | 6.52E-17    | 3 ASH1L         |
| 0.00025602 | 0.369459812 | 0.312 | 0.308 | 1           | 3 CFAP69        |
| 0.00197936 | 0.368540362 | 0.256 | 0.251 | 1           | 3 AP3D1         |
| 2.00E-11   | 0.368142297 | 0.292 | 0.239 | 6.41E-07    | 3 DZIP1         |
| 3.13E-08   | 0.367823556 | 0.287 | 0.251 | 0.001005947 | 3 AC006994.1    |
| 2.97E-28   | 0.366769708 | 0.77  | 0.73  | 9.55E-24    | 3 AC008014.1    |
| 0.00629282 | 0.366142772 | 0.254 | 0.251 | 1           | 3 PARP6         |
| 2.32E-07   | 0.365972183 | 0.522 | 0.56  | 0.007460702 | 3 AEBP2         |
| 1.79E-16   | 0.364567423 | 0.674 | 0.73  | 5.74E-12    | 3 KANSL1L       |
| 3.07E-06   | 0.363927366 | 0.367 | 0.357 | 0.098679665 | 3 STON2         |
| 4.10E-42   | 0.361701144 | 0.823 | 0.84  | 1.32E-37    | 3 SNX29         |
| 0.00711044 | 0.359538146 | 0.441 | 0.485 | 1           | 3 GOLM2         |
| 1.92E-06   | 0.358840975 | 0.292 | 0.266 | 0.061661456 | 3 CCDC18        |
| 1.57E-12   | 0.356556444 | 0.276 | 0.216 | 5.03E-08    | 3 ANKRD33B      |
| 0.00243607 | 0.356328933 | 0.266 | 0.263 | 1           | 3 HSP90B1       |
| 1.39E-10   | 0.355634154 | 0.331 | 0.288 | 4.45E-06    | 3 DHRS3         |
| 0.0068419  | 0.355267146 | 0.328 | 0.34  | 1           | 3 MLH3          |
| 2.40E-06   | 0.353961906 | 0.468 | 0.475 | 0.077040475 | 3 COBL          |
| 0.00124104 | 0.353721225 | 0.421 | 0.451 | 1           | 3 CDR2          |
| 1.23E-07   | 0.353603139 | 0.415 | 0.414 | 0.00395943  | 3 NEO1          |
| 0.00409451 | 0.352486329 | 0.446 | 0.501 | 1           | 3 SMG1P3        |
| 7.80E-56   | 0.352443126 | 0.942 | 0.843 | 2.51E-51    | 3 LRMDA         |
| 2.02E-70   | 0.352154741 | 0.977 | 0.87  | 6.49E-66    | 3 PKHD1         |
| 0.00024225 | 0.350292774 | 0.353 | 0.355 | 1           | 3 STAG3L5P-PVR1 |
| 0.00434233 | 0.348349717 | 0.566 | 0.653 | 1           | 3 PRRC2C        |
| 2.23E-26   | 0.346063176 | 0.82  | 0.852 | 7.17E-22    | 3 N4BP2L2       |
| 0.00065723 | 0.345605607 | 0.377 | 0.382 | 1           | 3 AC107223.1    |
| 1.34E-12   | 0.345211724 | 0.411 | 0.368 | 4.31E-08    | 3 MYRIP         |
| 0.00045308 | 0.343422875 | 0.564 | 0.656 | 1           | 3 SMG1          |
| 0.00270217 | 0.341433456 | 0.458 | 0.513 | 1           | 3 TPT1-AS1      |
| 1.24E-15   | 0.338669085 | 0.291 | 0.217 | 4.00E-11    | 3 SLC22A2       |
| 5.21E-11   | 0.336981014 | 0.607 | 0.673 | 1.67E-06    | 3 DENND1A       |
| 7.42E-13   | 0.328614197 | 0.564 | 0.597 | 2.38E-08    | 3 MAPKAP1       |
| 0.00018472 | 0.327781927 | 0.356 | 0.354 | 1           | 3 ACSL1         |
| 6.26E-13   | 0.327383753 | 0.449 | 0.388 | 2.01E-08    | 3 SGO1-AS1      |
| 1.84E-05   | 0.325824482 | 0.439 | 0.454 | 0.592216288 | 3 LCLAT1        |
| 0.00128709 | 0.32573965  | 0.542 | 0.611 | 1           | 3 CIRBP         |
| 1.02E-06   | 0.31540195  | 0.267 | 0.233 | 0.032695243 | 3 SLC66A2       |
| 3.84E-07   | 0.31517694  | 0.51  | 0.548 | 0.012347967 | 3 XPR1          |
| 9.10E-13   | 0.314754775 | 0.698 | 0.748 | 2.92E-08    | 3 GMDS-DT       |
| 0.00017578 | 0.312922823 | 0.261 | 0.236 | 1           | 3 SLC2A13       |
| 0.00019304 | 0.311894282 | 0.278 | 0.26  | 1           | 3 ITPRID2       |
| 7.78E-09   | 0.311712214 | 0.298 | 0.262 | 0.000250021 | 3 ENPP3         |
| 2.77E-24   | 0.311155479 | 0.369 | 0.249 | 8.91E-20    | 3 XIST          |
| 4.28E-11   | 0.310313689 | 0.354 | 0.304 | 1.38E-06    | 3 ABCB1         |
| 3.85E-12   | 0.309963315 | 0.316 | 0.253 | 1.24E-07    | 3 CHL1          |
| 2.42E-06   | 0.308649643 | 0.464 | 0.485 | 0.077795576 | 3 RORA-AS1      |
| 4.54E-23   | 0.308359074 | 0.737 | 0.775 | 1.46E-18    | 3 IGF1R         |
| 0.00441083 | 0.306230673 | 0.328 | 0.332 | 1           | 3 AC009690.2    |
| 2.89E-08   | 0.304929474 | 0.251 | 0.207 | 0.000927299 | 3 MAOA          |
| 0.00056892 | 0.298467444 | 0.602 | 0.682 | 1           | 3 AP005263.1    |

|            |             |       |       |             |              |
|------------|-------------|-------|-------|-------------|--------------|
| 1.99E-24   | 0.295071702 | 0.561 | 0.449 | 6.40E-20    | 3 SAMD5      |
| 0.00020515 | 0.294447786 | 0.577 | 0.621 | 1           | 3 DPH6       |
| 1.31E-06   | 0.292938929 | 0.414 | 0.394 | 0.042130004 | 3 DIAPH2     |
| 0.00020065 | 0.292206447 | 0.531 | 0.575 | 1           | 3 CFLAR      |
| 0.00183087 | 0.292173    | 0.29  | 0.379 | 1           | 3 TPR        |
| 1.49E-07   | 0.291168821 | 0.324 | 0.284 | 0.004772056 | 3 AL359232.1 |
| 0.00421912 | 0.287500105 | 0.422 | 0.453 | 1           | 3 RIN2       |
| 1.35E-42   | 0.285247909 | 0.683 | 0.631 | 4.35E-38    | 3 PBX1       |
| 2.78E-05   | 0.281810105 | 0.514 | 0.561 | 0.892911121 | 3 RUFY3      |
| 0.0026619  | 0.277844962 | 0.325 | 0.322 | 1           | 3 HPCAL1     |
| 1.31E-05   | 0.274505756 | 0.496 | 0.51  | 0.42072565  | 3 ZHX3       |
| 5.38E-09   | 0.271817742 | 0.627 | 0.696 | 0.000172904 | 3 NUMB       |
| 6.04E-11   | 0.270890529 | 0.592 | 0.589 | 1.94E-06    | 3 TRHDE      |
| 0.00019484 | 0.270801069 | 0.602 | 0.663 | 1           | 3 COMMD10    |
| 5.66E-20   | 0.266459147 | 0.833 | 0.814 | 1.82E-15    | 3 MAPK10     |
| 0.0083233  | 0.265667245 | 0.199 | 0.253 | 1           | 3 CANX       |
| 6.20E-07   | 0.264716057 | 0.254 | 0.218 | 0.019898765 | 3 PLD1       |
| 8.39E-19   | 0.261143984 | 0.669 | 0.651 | 2.70E-14    | 3 NFIB       |
| 0.00119417 | 0.260586274 | 0.336 | 0.436 | 1           | 3 CDK12      |
| 1.84E-16   | 0.25685795  | 0.322 | 0.242 | 5.91E-12    | 3 KL         |
| 0          | 4.958778313 | 0.987 | 0.199 | 0           | 4 SLC26A7    |
| 0          | 4.225491222 | 0.987 | 0.12  | 0           | 4 CLNK       |
| 0          | 4.219849982 | 0.965 | 0.129 | 0           | 4 ADGRF5     |
| 0          | 3.486710593 | 0.86  | 0.078 | 0           | 4 AC013271.1 |
| 0          | 3.405530282 | 0.962 | 0.055 | 0           | 4 AC015910.1 |
| 0          | 3.292055028 | 0.949 | 0.145 | 0           | 4 GALNT17    |
| 0          | 3.224237222 | 0.95  | 0.453 | 0           | 4 SLIT2      |
| 0          | 3.184460588 | 0.791 | 0.071 | 0           | 4 HS6ST3     |
| 0          | 3.178729143 | 0.975 | 0.405 | 0           | 4 PACRG      |
| 0          | 3.045063012 | 0.797 | 0.03  | 0           | 4 NXPH2      |
| 0          | 3.027600403 | 0.963 | 0.224 | 0           | 4 PDE1C      |
| 0          | 2.99600678  | 0.943 | 0.192 | 0           | 4 ATP6V0D2   |
| 0          | 2.988998705 | 0.903 | 0.155 | 0           | 4 TMEM101    |
| 0          | 2.97708755  | 0.926 | 0.271 | 0           | 4 ABCC4      |
| 0          | 2.881534822 | 0.757 | 0.08  | 0           | 4 CA8        |
| 0          | 2.870241234 | 0.961 | 0.396 | 0           | 4 ITGA6      |
| 0          | 2.85906666  | 0.824 | 0.064 | 0           | 4 AC112229.4 |
| 0          | 2.839308779 | 0.917 | 0.048 | 0           | 4 LINC01187  |
| 0          | 2.775366133 | 0.945 | 0.226 | 0           | 4 RCAN2      |
| 0          | 2.670613035 | 0.898 | 0.331 | 0           | 4 CACNB2     |
| 0          | 2.665968037 | 0.621 | 0.083 | 0           | 4 CNTNAP5    |
| 0          | 2.662312467 | 0.937 | 0.223 | 0           | 4 SNTB1      |
| 0          | 2.645457035 | 0.887 | 0.055 | 0           | 4 ATP6V1C2   |
| 0          | 2.634371253 | 0.708 | 0.134 | 0           | 4 UAP1       |
| 0          | 2.624399826 | 0.758 | 0.065 | 0           | 4 LY86-AS1   |
| 0          | 2.541811147 | 0.828 | 0.026 | 0           | 4 KIT        |
| 0          | 2.529865843 | 0.84  | 0.177 | 0           | 4 ADAMTSL1   |
| 0          | 2.515315334 | 0.858 | 0.329 | 0           | 4 SHOC1      |
| 0          | 2.491966655 | 0.714 | 0.037 | 0           | 4 AC092422.1 |
| 0          | 2.476797792 | 0.952 | 0.434 | 0           | 4 ARHGAP18   |
| 0          | 2.474057584 | 0.725 | 0.025 | 0           | 4 LEF1       |



|           |             |       |       |           |              |
|-----------|-------------|-------|-------|-----------|--------------|
| 0         | 2.405068523 | 0.899 | 0.397 | 0         | 4 NRXN3      |
| 0         | 2.383972794 | 0.773 | 0.043 | 0         | 4 AC112229.3 |
| 0         | 2.345769214 | 0.804 | 0.105 | 0         | 4 DOCK10     |
| 0         | 2.327760704 | 0.799 | 0.011 | 0         | 4 DMRT2      |
| 0         | 2.304787059 | 0.997 | 0.876 | 0         | 4 MAGI1      |
| 0         | 2.293142773 | 0.805 | 0.152 | 0         | 4 SEMA3C     |
| 0         | 2.286896405 | 0.923 | 0.401 | 0         | 4 EPS8       |
| 0         | 2.26105605  | 0.756 | 0.056 | 0         | 4 LIMS3      |
| 0         | 2.254521478 | 0.698 | 0.043 | 0         | 4 THRB-AS1   |
| 0         | 2.216989454 | 0.805 | 0.154 | 0         | 4 ADGRF1     |
| 0         | 2.207959961 | 0.88  | 0.213 | 0         | 4 PSD3       |
| 0         | 2.134641734 | 0.934 | 0.372 | 0         | 4 MPPE2      |
| 0         | 2.095683397 | 0.962 | 0.567 | 0         | 4 TMEM117    |
| 0         | 2.076572562 | 0.621 | 0.017 | 0         | 4 STAP1      |
| 0         | 2.053041208 | 0.716 | 0.195 | 0         | 4 UST        |
| 0         | 2.04225621  | 0.693 | 0.01  | 0         | 4 AQP6       |
| 0         | 2.034376268 | 0.874 | 0.416 | 0         | 4 GPAT3      |
| 0         | 2.03170806  | 0.976 | 0.649 | 0         | 4 PTGER3     |
| 0         | 1.964219461 | 0.883 | 0.447 | 0         | 4 MOB1B      |
| 0         | 1.935982089 | 0.687 | 0.041 | 0         | 4 AC140479.3 |
| 0         | 1.921006096 | 0.75  | 0.229 | 0         | 4 LAMA2      |
| 0         | 1.911310775 | 0.903 | 0.389 | 0         | 4 TBC1D14    |
| 0         | 1.881046936 | 0.86  | 0.234 | 0         | 4 FYB2       |
| 0         | 1.86061507  | 0.944 | 0.454 | 0         | 4 GRB14      |
| 0         | 1.858782218 | 0.847 | 0.216 | 0         | 4 RHBG       |
| 0         | 1.849631347 | 0.919 | 0.509 | 0         | 4 LIMS1      |
| 0         | 1.815155892 | 0.909 | 0.38  | 0         | 4 PLCG2      |
| 0         | 1.815107996 | 0.929 | 0.568 | 0         | 4 MAPKAP1    |
| 0         | 1.812019823 | 0.978 | 0.806 | 0         | 4 NEDD4L     |
| 0         | 1.763938205 | 0.643 | 0.05  | 0         | 4 MTLN       |
| 0         | 1.73930722  | 0.687 | 0.057 | 0         | 4 VWASB1     |
| 0         | 1.711321468 | 0.836 | 0.501 | 0         | 4 CAB39      |
| 0         | 1.711050049 | 0.793 | 0.215 | 0         | 4 DOCK8      |
| 0         | 1.691979537 | 0.624 | 0.043 | 0         | 4 FAM13C     |
| 0         | 1.687591761 | 0.65  | 0.009 | 0         | 4 AC026333.3 |
| 0         | 1.656455448 | 0.762 | 0.272 | 0         | 4 PXK        |
| 0         | 1.649299349 | 0.783 | 0.116 | 0         | 4 CELF2      |
| 0         | 1.641014756 | 0.904 | 0.573 | 0         | 4 AHCYL2     |
| 0         | 1.626775709 | 0.625 | 0.028 | 0         | 4 SMIM34A    |
| 0         | 1.614623004 | 0.962 | 0.768 | 0         | 4 FOXP1      |
| 0         | 1.604092777 | 0.919 | 0.659 | 0         | 4 SHROOM3    |
| 0         | 1.58301292  | 0.786 | 0.39  | 0         | 4 GNG12      |
| 0         | 1.571621158 | 0.674 | 0.17  | 0         | 4 LRRC9      |
| 0         | 1.566618627 | 0.792 | 0.296 | 0         | 4 PRLR       |
| 0         | 1.555476019 | 0.805 | 0.243 | 0         | 4 INPP4A     |
| 0         | 1.553226089 | 0.601 | 0.089 | 0         | 4 NTN1       |
| 1.11E-170 | 1.539598285 | 0.896 | 0.717 | 3.58E-166 | 4 DIP2C      |
| 0         | 1.524681719 | 0.929 | 0.51  | 0         | 4 ABCA5      |
| 0         | 1.520552526 | 0.713 | 0.163 | 0         | 4 C12orf75   |
| 0         | 1.508211557 | 0.743 | 0.121 | 0         | 4 B3GAT1-DT  |
| 0         | 1.507707594 | 0.876 | 0.446 | 0         | 4 PCNX4      |

|           |             |       |       |           |              |
|-----------|-------------|-------|-------|-----------|--------------|
| 0         | 1.475874526 | 0.736 | 0.22  | 0         | 4 CHL1       |
| 0         | 1.472966848 | 0.663 | 0.059 | 0         | 4 IL18       |
| 0         | 1.467074548 | 0.618 | 0.2   | 0         | 4 TSPAN5     |
| 0         | 1.443708479 | 0.965 | 0.752 | 0         | 4 ITPR2      |
| 0         | 1.434291863 | 0.889 | 0.385 | 0         | 4 ATP6V0A4   |
| 0         | 1.430498325 | 0.719 | 0.22  | 0         | 4 LITAF      |
| 0         | 1.425102716 | 0.584 | 0.132 | 0         | 4 IRS1       |
| 0         | 1.421328881 | 0.8   | 0.31  | 0         | 4 GLCCI1     |
| 0         | 1.420089241 | 0.805 | 0.078 | 0         | 4 SLC4A9     |
| 0         | 1.417152592 | 0.938 | 0.453 | 0         | 4 PDE1A      |
| 0         | 1.408976248 | 0.593 | 0.067 | 0         | 4 KBTBD12    |
| 0         | 1.404008959 | 0.905 | 0.581 | 0         | 4 FOXO1      |
| 0         | 1.403979384 | 0.746 | 0.127 | 0         | 4 AC008438.1 |
| 0         | 1.38970942  | 0.512 | 0.03  | 0         | 4 AL031123.1 |
| 0         | 1.380268412 | 0.597 | 0.065 | 0         | 4 SYT17      |
| 9.67E-263 | 1.377116811 | 0.901 | 0.585 | 3.10E-258 | 4 CA12       |
| 0         | 1.376289369 | 0.687 | 0.187 | 0         | 4 EXOSC7     |
| 6.78E-260 | 1.358020071 | 0.776 | 0.435 | 2.18E-255 | 4 AC145212.1 |
| 0         | 1.350758152 | 0.55  | 0.043 | 0         | 4 AL691403.1 |
| 0         | 1.347029944 | 0.593 | 0.107 | 0         | 4 RHCG       |
| 0         | 1.344938089 | 0.823 | 0.423 | 0         | 4 SMURF1     |
| 2.67E-283 | 1.341755398 | 0.847 | 0.48  | 8.57E-279 | 4 DSCAML1    |
| 0         | 1.341071131 | 0.801 | 0.293 | 0         | 4 TMPRSS2    |
| 0         | 1.332533676 | 0.723 | 0.191 | 0         | 4 AP002884.2 |
| 0         | 1.32661111  | 0.795 | 0.396 | 0         | 4 ATP6V1A    |
| 0         | 1.325650301 | 0.602 | 0.131 | 0         | 4 LINC01091  |
| 0         | 1.324725457 | 0.443 | 0.026 | 0         | 4 ST8SIA6    |
| 0         | 1.322814933 | 0.607 | 0.112 | 0         | 4 GMPR       |
| 0         | 1.322272855 | 0.554 | 0.107 | 0         | 4 AP000282.1 |
| 0         | 1.315464256 | 0.908 | 0.566 | 0         | 4 PTPRJ      |
| 0         | 1.31306136  | 0.742 | 0.309 | 0         | 4 MPP7       |
| 0         | 1.307333818 | 0.594 | 0.035 | 0         | 4 ATP6V1G3   |
| 0         | 1.290176927 | 0.778 | 0.297 | 0         | 4 SLC22A23   |
| 0         | 1.286248024 | 0.691 | 0.232 | 0         | 4 RARB       |
| 0         | 1.285777263 | 0.977 | 0.774 | 0         | 4 PLCL1      |
| 0         | 1.282941283 | 0.935 | 0.645 | 0         | 4 MAGI3      |
| 0         | 1.276080923 | 0.737 | 0.328 | 0         | 4 ELOVL7     |
| 0         | 1.268055037 | 0.525 | 0.148 | 0         | 4 THSD7B     |
| 1.08E-234 | 1.262529174 | 0.787 | 0.481 | 3.47E-230 | 4 FBXO34     |
| 0         | 1.26224838  | 0.799 | 0.284 | 0         | 4 TMEM213    |
| 6.30E-295 | 1.260268065 | 0.868 | 0.49  | 2.02E-290 | 4 RNF152     |
| 0         | 1.258910369 | 0.473 | 0.027 | 0         | 4 SLC4A1     |
| 5.78E-289 | 1.256751445 | 0.87  | 0.643 | 1.86E-284 | 4 UBR3       |
| 0         | 1.246254121 | 0.629 | 0.133 | 0         | 4 DSG2       |
| 0         | 1.245571008 | 0.896 | 0.548 | 0         | 4 TBC1D4     |
| 1.14E-238 | 1.2276151   | 0.621 | 0.27  | 3.67E-234 | 4 LINC01090  |
| 0         | 1.217307728 | 0.942 | 0.681 | 0         | 4 ZSWIM6     |
| 0         | 1.215606725 | 0.484 | 0.013 | 0         | 4 AC013268.5 |
| 0         | 1.2132523   | 0.915 | 0.612 | 0         | 4 TBC1D1     |
| 0         | 1.204527956 | 0.625 | 0.167 | 0         | 4 CDYL2      |
| 0         | 1.188948131 | 0.32  | 0.046 | 0         | 4 CFTR       |

|           |             |       |       |           |              |
|-----------|-------------|-------|-------|-----------|--------------|
| 0         | 1.174902521 | 0.464 | 0.034 | 0         | 4 ITPRID1    |
| 8.38E-240 | 1.169276186 | 0.734 | 0.38  | 2.69E-235 | 4 GULP1      |
| 1.56E-293 | 1.157812535 | 0.757 | 0.387 | 5.02E-289 | 4 PPP2R5A    |
| 7.13E-278 | 1.147346211 | 0.801 | 0.415 | 2.29E-273 | 4 NCOA7      |
| 0         | 1.125643972 | 0.434 | 0.003 | 0         | 4 LINC01230  |
| 4.09E-247 | 1.111965548 | 0.831 | 0.495 | 1.31E-242 | 4 KIAA1328   |
| 0         | 1.099659994 | 0.837 | 0.382 | 0         | 4 SCIN       |
| 3.10E-271 | 1.093980483 | 0.906 | 0.662 | 9.96E-267 | 4 FNDC3A     |
| 0         | 1.092588754 | 0.483 | 0.093 | 0         | 4 AL356124.1 |
| 0         | 1.089837435 | 0.536 | 0.075 | 0         | 4 ITIH5      |
| 0         | 1.084654349 | 0.297 | 0.012 | 0         | 4 ADTRP      |
| 0         | 1.084443728 | 0.753 | 0.27  | 0         | 4 VAX2       |
| 1.68E-272 | 1.084353822 | 0.888 | 0.66  | 5.40E-268 | 4 MAP4K3     |
| 4.01E-183 | 1.082368153 | 0.657 | 0.338 | 1.29E-178 | 4 SGPP2      |
| 0         | 1.079869007 | 0.37  | 0.035 | 0         | 4 PYY        |
| 0         | 1.076291971 | 0.347 | 0.017 | 0         | 4 FOXI1      |
| 0         | 1.070564849 | 0.595 | 0.124 | 0         | 4 SIPA1L2    |
| 6.02E-230 | 1.068144805 | 0.718 | 0.355 | 1.93E-225 | 4 AC107223.1 |
| 0         | 1.067441402 | 0.476 | 0.014 | 0         | 4 AC084048.1 |
| 2.04E-273 | 1.067296352 | 0.693 | 0.319 | 6.54E-269 | 4 TMEM116    |
| 2.89E-149 | 1.0507394   | 0.723 | 0.46  | 9.28E-145 | 4 ITGAV      |
| 3.50E-185 | 1.047785098 | 0.357 | 0.108 | 1.13E-180 | 4 UNC5D      |
| 0         | 1.046215115 | 0.986 | 0.835 | 0         | 4 MUC20-OT1  |
| 0         | 1.042240775 | 0.427 | 0.011 | 0         | 4 GPAA1P2    |
| 0         | 1.037444555 | 0.437 | 0.04  | 0         | 4 SYT10      |
| 0         | 1.035756615 | 0.696 | 0.178 | 0         | 4 CD200      |
| 2.50E-266 | 1.025891268 | 0.827 | 0.513 | 8.03E-262 | 4 PPP1R12B   |
| 0         | 1.020356222 | 0.699 | 0.246 | 0         | 4 STIM1      |
| 6.55E-283 | 1.017320073 | 0.937 | 0.726 | 2.10E-278 | 4 OXR1       |
| 4.83E-260 | 1.011769147 | 0.655 | 0.249 | 1.55E-255 | 4 LINC02343  |
| 0         | 1.011076128 | 0.443 | 0.072 | 0         | 4 AC013472.1 |
| 0         | 1.000636518 | 0.479 | 0.073 | 0         | 4 CCBE1      |
| 1.62E-210 | 0.98705377  | 0.88  | 0.643 | 5.22E-206 | 4 HIPK2      |
| 2.99E-182 | 0.986933742 | 0.681 | 0.361 | 9.59E-178 | 4 IPCEF1     |
| 0         | 0.981019206 | 0.37  | 0.003 | 0         | 4 HCAR2      |
| 0         | 0.967566635 | 0.448 | 0.098 | 0         | 4 IGFBP5     |
| 0         | 0.963997085 | 0.666 | 0.207 | 0         | 4 AC068234.1 |
| 1.29E-235 | 0.962562129 | 0.764 | 0.43  | 4.13E-231 | 4 NRDC       |
| 5.63E-234 | 0.955878975 | 0.739 | 0.383 | 1.81E-229 | 4 UBL3       |
| 9.22E-304 | 0.955829968 | 0.529 | 0.171 | 2.96E-299 | 4 UHMK1      |
| 9.91E-220 | 0.955672441 | 0.883 | 0.615 | 3.18E-215 | 4 THRB       |
| 2.24E-152 | 0.950409541 | 0.769 | 0.467 | 7.20E-148 | 4 AC138305.1 |
| 6.97E-215 | 0.947687002 | 0.878 | 0.592 | 2.24E-210 | 4 ITPR1      |
| 2.49E-193 | 0.944444133 | 0.665 | 0.341 | 8.01E-189 | 4 JADE1      |
| 0         | 0.943954094 | 0.473 | 0.097 | 0         | 4 COL24A1    |
| 0         | 0.942119944 | 0.357 | 0.035 | 0         | 4 SVEP1      |
| 0         | 0.939024713 | 0.3   | 0.011 | 0         | 4 AQP5       |
| 5.39E-225 | 0.936168549 | 0.726 | 0.37  | 1.73E-220 | 4 PHLPP1     |
| 7.14E-191 | 0.931721812 | 0.86  | 0.528 | 2.29E-186 | 4 GRIP1      |
| 4.70E-186 | 0.928980574 | 0.858 | 0.633 | 1.51E-181 | 4 FNBP1L     |
| 5.06E-301 | 0.927595137 | 0.595 | 0.203 | 1.62E-296 | 4 FGF9       |

|           |             |       |       |           |              |
|-----------|-------------|-------|-------|-----------|--------------|
| 5.49E-168 | 0.927371458 | 0.694 | 0.394 | 1.76E-163 | 4 EZR        |
| 0         | 0.924330206 | 0.434 | 0.057 | 0         | 4 CCDC68     |
| 1.34E-229 | 0.921175301 | 0.688 | 0.312 | 4.29E-225 | 4 KIF21A     |
| 8.89E-252 | 0.919417929 | 0.756 | 0.376 | 2.85E-247 | 4 ABCC5      |
| 7.57E-264 | 0.918741798 | 0.699 | 0.305 | 2.43E-259 | 4 CRYBG3     |
| 0         | 0.916785595 | 0.484 | 0.095 | 0         | 4 STUM       |
| 2.08E-190 | 0.91075097  | 0.739 | 0.429 | 6.70E-186 | 4 NNT        |
| 0         | 0.910575194 | 0.331 | 0.029 | 0         | 4 PAK5       |
| 2.60E-237 | 0.910353399 | 0.876 | 0.496 | 8.34E-233 | 4 FREM1      |
| 4.78E-240 | 0.909362815 | 0.642 | 0.271 | 1.54E-235 | 4 GALNT10    |
| 1.84E-192 | 0.904875501 | 0.799 | 0.503 | 5.91E-188 | 4 PTBP3      |
| 2.97E-193 | 0.904159874 | 0.586 | 0.262 | 9.55E-189 | 4 TEKT4P2    |
| 3.80E-231 | 0.903943225 | 0.565 | 0.219 | 1.22E-226 | 4 NPC1       |
| 0         | 0.903311321 | 0.536 | 0.113 | 0         | 4 PARVB      |
| 1.46E-208 | 0.899517377 | 0.826 | 0.487 | 4.68E-204 | 4 SKAP1      |
| 3.11E-198 | 0.898293322 | 0.628 | 0.297 | 9.98E-194 | 4 AC024145.1 |
| 9.54E-304 | 0.897876549 | 0.596 | 0.204 | 3.06E-299 | 4 BAIAP2L1   |
| 4.93E-179 | 0.894868157 | 0.798 | 0.538 | 1.58E-174 | 4 RUFY3      |
| 8.69E-190 | 0.883058596 | 0.616 | 0.299 | 2.79E-185 | 4 EGLN1      |
| 3.20E-205 | 0.879064519 | 0.725 | 0.386 | 1.03E-200 | 4 ANXA4      |
| 7.03E-261 | 0.875423978 | 0.57  | 0.195 | 2.26E-256 | 4 ST3GAL1    |
| 0         | 0.871912951 | 0.426 | 0.027 | 0         | 4 HEPACAM2   |
| 2.10E-241 | 0.871716976 | 0.631 | 0.267 | 6.76E-237 | 4 DMD        |
| 5.70E-206 | 0.870852276 | 0.849 | 0.514 | 1.83E-201 | 4 MYO10      |
| 0         | 0.86896594  | 0.327 | 0.022 | 0         | 4 KCNG3      |
| 6.85E-181 | 0.866554065 | 0.766 | 0.477 | 2.20E-176 | 4 ASXL1      |
| 2.90E-198 | 0.866469507 | 0.787 | 0.458 | 9.33E-194 | 4 MYO1D      |
| 9.25E-180 | 0.863338849 | 0.765 | 0.438 | 2.97E-175 | 4 TXNIP      |
| 0         | 0.859799038 | 0.407 | 0.033 | 0         | 4 RACGAP1    |
| 1.59E-236 | 0.858912665 | 0.901 | 0.695 | 5.11E-232 | 4 STK3       |
| 2.76E-29  | 0.858253229 | 0.988 | 0.986 | 8.85E-25  | 4 MT-RNR2    |
| 0         | 0.857983499 | 0.343 | 0.014 | 0         | 4 UBE2QL1    |
| 2.73E-181 | 0.851855254 | 0.751 | 0.413 | 8.76E-177 | 4 EGFR       |
| 5.02E-196 | 0.849883731 | 0.781 | 0.47  | 1.61E-191 | 4 RALGPS2    |
| 1.10E-218 | 0.849718236 | 0.422 | 0.13  | 3.52E-214 | 4 RAB31      |
| 2.59E-170 | 0.848067654 | 0.883 | 0.73  | 8.31E-166 | 4 PICALM     |
| 1.27E-45  | 0.844651259 | 0.729 | 0.628 | 4.06E-41  | 4 MTRNR2L12  |
| 3.60E-166 | 0.839414179 | 0.778 | 0.475 | 1.16E-161 | 4 FBXL20     |
| 5.72E-198 | 0.838820802 | 0.929 | 0.797 | 1.84E-193 | 4 AC016831.6 |
| 9.10E-192 | 0.836040135 | 0.669 | 0.347 | 2.92E-187 | 4 PNPLA8     |
| 1.14E-198 | 0.834162967 | 0.762 | 0.394 | 3.67E-194 | 4 SLC16A7    |
| 4.77E-129 | 0.833011518 | 0.747 | 0.465 | 1.53E-124 | 4 GNG12-AS1  |
| 0         | 0.82941728  | 0.288 | 0.02  | 0         | 4 STAC2      |
| 0         | 0.827152279 | 0.338 | 0.011 | 0         | 4 LINC01739  |
| 8.78E-279 | 0.82472329  | 0.439 | 0.122 | 2.82E-274 | 4 ZMPSTE24   |
| 2.42E-199 | 0.823671196 | 0.349 | 0.101 | 7.78E-195 | 4 DSCAM      |
| 2.28E-164 | 0.819774287 | 0.377 | 0.129 | 7.33E-160 | 4 AL390957.1 |
| 5.94E-199 | 0.812969141 | 0.665 | 0.329 | 1.91E-194 | 4 ADIPOR2    |
| 1.28E-242 | 0.799385663 | 0.68  | 0.282 | 4.11E-238 | 4 UGT8       |
| 3.97E-180 | 0.79830769  | 0.805 | 0.43  | 1.27E-175 | 4 SAMD5      |
| 6.84E-230 | 0.797218692 | 0.688 | 0.312 | 2.20E-225 | 4 ST3GAL6    |

|           |             |       |       |           |              |
|-----------|-------------|-------|-------|-----------|--------------|
| 5.39E-209 | 0.796316461 | 0.633 | 0.292 | 1.73E-204 | 4 AMFR       |
| 0         | 0.796203539 | 0.368 | 0.033 | 0         | 4 EDARADD    |
| 3.83E-197 | 0.7948808   | 0.6   | 0.264 | 1.23E-192 | 4 TMEM65     |
| 3.00E-167 | 0.794023729 | 0.705 | 0.401 | 9.63E-163 | 4 SPRED2     |
| 9.67E-157 | 0.792062881 | 0.575 | 0.28  | 3.11E-152 | 4 ELP3       |
| 2.97E-181 | 0.7919536   | 0.783 | 0.437 | 9.53E-177 | 4 STK39      |
| 2.14E-162 | 0.79194096  | 0.804 | 0.498 | 6.87E-158 | 4 AL137782.1 |
| 2.60E-218 | 0.787437222 | 0.5   | 0.179 | 8.36E-214 | 4 MAPRE2     |
| 5.28E-263 | 0.785270524 | 0.997 | 0.972 | 1.70E-258 | 4 PDE4D      |
| 0         | 0.784592323 | 0.457 | 0.092 | 0         | 4 ATP6AP2    |
| 1.43E-85  | 0.783863099 | 0.425 | 0.228 | 4.60E-81  | 4 LIN7A      |
| 6.21E-164 | 0.7791518   | 0.663 | 0.351 | 1.99E-159 | 4 YAF2       |
| 2.88E-165 | 0.777618096 | 0.792 | 0.508 | 9.26E-161 | 4 MAP4K3-DT  |
| 3.43E-103 | 0.773770766 | 0.612 | 0.341 | 1.10E-98  | 4 BACE2      |
| 1.76E-249 | 0.771419008 | 0.594 | 0.228 | 5.65E-245 | 4 ATP9A      |
| 5.41E-197 | 0.770223997 | 0.921 | 0.665 | 1.74E-192 | 4 TFCP2L1    |
| 0         | 0.769157588 | 0.265 | 0.004 | 0         | 4 AL365394.1 |
| 3.00E-234 | 0.768238143 | 0.942 | 0.602 | 9.62E-230 | 4 PRKG1      |
| 5.88E-185 | 0.7636038   | 0.782 | 0.464 | 1.89E-180 | 4 CLIP1      |
| 5.38E-157 | 0.763119229 | 0.61  | 0.292 | 1.73E-152 | 4 GPRIN3     |
| 6.64E-204 | 0.762258965 | 0.559 | 0.229 | 2.13E-199 | 4 NSUN7      |
| 5.04E-193 | 0.761398209 | 0.66  | 0.313 | 1.62E-188 | 4 LIMA1      |
| 8.31E-277 | 0.760132523 | 0.542 | 0.162 | 2.67E-272 | 4 PCED1B     |
| 4.51E-171 | 0.754517382 | 0.819 | 0.537 | 1.45E-166 | 4 FOXN3      |
| 0         | 0.753832774 | 0.311 | 0.02  | 0         | 4 LY86       |
| 8.96E-203 | 0.750577346 | 0.598 | 0.258 | 2.88E-198 | 4 TMCO4      |
| 5.34E-166 | 0.749586289 | 0.595 | 0.274 | 1.71E-161 | 4 MAL        |
| 0         | 0.749120687 | 0.337 | 0.031 | 0         | 4 GRIP2      |
| 1.29E-175 | 0.74565965  | 0.773 | 0.416 | 4.14E-171 | 4 THSD4      |
| 2.17E-178 | 0.743888838 | 0.662 | 0.334 | 6.98E-174 | 4 RAD54L2    |
| 7.13E-152 | 0.741442971 | 0.635 | 0.309 | 2.29E-147 | 4 AL033504.1 |
| 6.67E-263 | 0.736473485 | 0.313 | 0.063 | 2.14E-258 | 4 RTN1       |
| 2.09E-118 | 0.734448018 | 0.714 | 0.444 | 6.71E-114 | 4 FAM107B    |
| 3.20E-172 | 0.733803382 | 0.521 | 0.225 | 1.03E-167 | 4 SPOPL      |
| 6.42E-192 | 0.733782328 | 0.475 | 0.17  | 2.06E-187 | 4 MBOAT1     |
| 2.10E-179 | 0.725691701 | 0.495 | 0.198 | 6.76E-175 | 4 TFRC       |
| 3.10E-145 | 0.725166773 | 0.691 | 0.365 | 9.96E-141 | 4 SIM1       |
| 4.47E-148 | 0.724094478 | 0.934 | 0.804 | 1.44E-143 | 4 PRKN       |
| 0         | 0.723880246 | 0.302 | 0.011 | 0         | 4 LEF1-AS1   |
| 5.47E-225 | 0.723638127 | 0.466 | 0.156 | 1.76E-220 | 4 SBF2-AS1   |
| 0         | 0.719331611 | 0.39  | 0.055 | 0         | 4 MAPRE3     |
| 1.08E-215 | 0.71842503  | 0.514 | 0.191 | 3.48E-211 | 4 ABHD2      |
| 6.61E-233 | 0.71713317  | 0.532 | 0.189 | 2.12E-228 | 4 PPFIBP2    |
| 3.32E-157 | 0.716189964 | 0.789 | 0.504 | 1.07E-152 | 4 ATP6V1H    |
| 0         | 0.716144714 | 0.321 | 0.05  | 0         | 4 AC008691.1 |
| 6.82E-175 | 0.715287731 | 0.422 | 0.146 | 2.19E-170 | 4 BDKRB2     |
| 0         | 0.713749876 | 0.331 | 0.025 | 0         | 4 FBN3       |
| 6.32E-173 | 0.711299294 | 0.64  | 0.297 | 2.03E-168 | 4 ABCA10     |
| 2.09E-152 | 0.71082575  | 0.673 | 0.375 | 6.70E-148 | 4 CAMSAP2    |
| 3.98E-176 | 0.709300356 | 0.6   | 0.282 | 1.28E-171 | 4 DAP        |
| 1.54E-205 | 0.705993717 | 0.958 | 0.819 | 4.95E-201 | 4 MSI2       |

|           |             |       |       |           |              |
|-----------|-------------|-------|-------|-----------|--------------|
| 0         | 0.701069153 | 0.47  | 0.121 | 0         | 4 DGKI       |
| 1.31E-73  | 0.696916564 | 0.638 | 0.439 | 4.20E-69  | 4 PALLD      |
| 8.76E-175 | 0.695743961 | 0.315 | 0.089 | 2.81E-170 | 4 EGFEM1P    |
| 7.02E-116 | 0.692740093 | 0.817 | 0.633 | 2.26E-111 | 4 RAPGEF2    |
| 3.41E-148 | 0.692582823 | 0.282 | 0.083 | 1.10E-143 | 4 MIR3681HG  |
| 6.68E-82  | 0.692273963 | 0.345 | 0.163 | 2.14E-77  | 4 AC138627.1 |
| 2.63E-118 | 0.691848594 | 0.675 | 0.424 | 8.46E-114 | 4 KIF13A     |
| 2.71E-143 | 0.690514001 | 0.769 | 0.475 | 8.70E-139 | 4 COL4A4     |
| 5.23E-171 | 0.689715095 | 0.409 | 0.145 | 1.68E-166 | 4 KCNK1      |
| 4.07E-156 | 0.689421177 | 0.429 | 0.168 | 1.31E-151 | 4 GAS2       |
| 2.77E-152 | 0.688031024 | 0.511 | 0.226 | 8.90E-148 | 4 ZDHHC3     |
| 1.55E-107 | 0.687945579 | 0.603 | 0.345 | 4.96E-103 | 4 MOB3B      |
| 3.10E-264 | 0.687694192 | 0.557 | 0.182 | 9.95E-260 | 4 DCLK2      |
| 0         | 0.686970678 | 0.324 | 0.029 | 0         | 4 NEURL1     |
| 1.42E-147 | 0.685410845 | 0.809 | 0.565 | 4.58E-143 | 4 AL359736.1 |
| 2.22E-111 | 0.68502072  | 0.691 | 0.457 | 7.12E-107 | 4 VAPA       |
| 1.06E-179 | 0.684168428 | 0.988 | 0.874 | 3.40E-175 | 4 ESRRG      |
| 2.07E-191 | 0.682137341 | 0.81  | 0.408 | 6.66E-187 | 4 CLCNKB     |
| 2.33E-125 | 0.680744852 | 0.71  | 0.437 | 7.49E-121 | 4 LMO7       |
| 1.59E-182 | 0.680211326 | 0.545 | 0.221 | 5.11E-178 | 4 COL6A1     |
| 3.44E-191 | 0.679283562 | 0.341 | 0.098 | 1.11E-186 | 4 PDE11A     |
| 0         | 0.677744907 | 0.341 | 0.026 | 0         | 4 FAM153B    |
| 0         | 0.677577157 | 0.261 | 0.011 | 0         | 4 ANKRD22    |
| 8.93E-188 | 0.676843929 | 0.52  | 0.208 | 2.87E-183 | 4 ATP7A      |
| 0         | 0.676317784 | 0.325 | 0.026 | 0         | 4 TIMD4      |
| 0         | 0.67612141  | 0.29  | 0.01  | 0         | 4 LINC01323  |
| 8.11E-177 | 0.675922598 | 0.64  | 0.316 | 2.61E-172 | 4 EXOC6      |
| 5.42E-180 | 0.674497868 | 0.925 | 0.695 | 1.74E-175 | 4 PRKCA      |
| 0         | 0.668662778 | 0.278 | 0.035 | 0         | 4 CR1L       |
| 3.11E-184 | 0.667776348 | 0.63  | 0.287 | 9.99E-180 | 4 NPNT       |
| 7.52E-197 | 0.665470986 | 0.455 | 0.154 | 2.41E-192 | 4 PLPP4      |
| 2.65E-190 | 0.664505058 | 0.457 | 0.164 | 8.51E-186 | 4 WNK3       |
| 1.55E-268 | 0.664449307 | 0.252 | 0.04  | 4.97E-264 | 4 VAT1L      |
| 1.02E-140 | 0.66411587  | 0.664 | 0.343 | 3.28E-136 | 4 PPARG      |
| 1.88E-114 | 0.66273656  | 0.632 | 0.353 | 6.04E-110 | 4 SLC43A2    |
| 3.97E-136 | 0.661829702 | 0.723 | 0.446 | 1.27E-131 | 4 RGPD5      |
| 3.45E-137 | 0.659453397 | 0.658 | 0.351 | 1.11E-132 | 4 ARNT2      |
| 9.52E-130 | 0.657703363 | 0.678 | 0.397 | 3.06E-125 | 4 MEMO1      |
| 1.61E-219 | 0.657338035 | 0.495 | 0.167 | 5.17E-215 | 4 GAS6       |
| 6.65E-209 | 0.656176752 | 0.389 | 0.115 | 2.14E-204 | 4 SH2D4A     |
| 1.84E-168 | 0.653053418 | 0.477 | 0.184 | 5.90E-164 | 4 PLCH1      |
| 1.16E-139 | 0.651667683 | 0.866 | 0.533 | 3.71E-135 | 4 EFNA5      |
| 3.87E-154 | 0.651208831 | 0.624 | 0.32  | 1.24E-149 | 4 SPTLC2     |
| 2.51E-176 | 0.650526289 | 0.604 | 0.27  | 8.05E-172 | 4 CDH1       |
| 0         | 0.648776102 | 0.356 | 0.038 | 0         | 4 FAM153A    |
| 5.59E-209 | 0.646779839 | 0.422 | 0.134 | 1.80E-204 | 4 MUC20P1    |
| 0         | 0.646060098 | 0.285 | 0.017 | 0         | 4 LINC01768  |
| 1.20E-132 | 0.644022941 | 0.739 | 0.469 | 3.84E-128 | 4 PRKAA2     |
| 1.41E-164 | 0.643636403 | 0.614 | 0.285 | 4.54E-160 | 4 SUSD1      |
| 0         | 0.642650516 | 0.266 | 0.019 | 0         | 4 UNC80      |
| 1.38E-86  | 0.640076808 | 0.676 | 0.436 | 4.44E-82  | 4 PPM1L      |

|           |             |       |       |           |                |
|-----------|-------------|-------|-------|-----------|----------------|
| 0         | 0.640041834 | 0.332 | 0.035 | 0         | 4 FAM153CP     |
| 1.12E-94  | 0.637128432 | 0.86  | 0.649 | 3.59E-90  | 4 LGR4         |
| 7.37E-176 | 0.636828726 | 0.411 | 0.14  | 2.37E-171 | 4 AC243772.3   |
| 1.49E-172 | 0.635962621 | 0.615 | 0.276 | 4.77E-168 | 4 PLCB4        |
| 7.19E-118 | 0.635347749 | 0.612 | 0.344 | 2.31E-113 | 4 LINC01145    |
| 1.05E-119 | 0.634796394 | 0.839 | 0.619 | 3.36E-115 | 4 ARHGEF28     |
| 1.56E-121 | 0.627166291 | 0.73  | 0.447 | 5.03E-117 | 4 MCU          |
| 1.99E-146 | 0.626380214 | 0.47  | 0.192 | 6.39E-142 | 4 ERC2         |
| 1.76E-122 | 0.626052286 | 0.611 | 0.335 | 5.66E-118 | 4 ATP10D       |
| 1.18E-125 | 0.625849605 | 0.588 | 0.309 | 3.80E-121 | 4 MEGF9        |
| 4.81E-147 | 0.625610108 | 0.987 | 0.84  | 1.55E-142 | 4 LRMDA        |
| 7.96E-140 | 0.623625613 | 0.632 | 0.322 | 2.56E-135 | 4 CASZ1        |
| 0         | 0.622007401 | 0.265 | 0.014 | 0         | 4 ELAVL2       |
| 6.49E-218 | 0.621628351 | 0.337 | 0.086 | 2.08E-213 | 4 FAM189A2     |
| 3.88E-118 | 0.619074304 | 0.731 | 0.45  | 1.24E-113 | 4 PRR5-ARHGAP8 |
| 8.98E-162 | 0.617290665 | 0.462 | 0.177 | 2.89E-157 | 4 SDC2         |
| 0         | 0.616240693 | 0.305 | 0.027 | 0         | 4 PACRG-AS3    |
| 3.31E-123 | 0.615348302 | 0.735 | 0.476 | 1.06E-118 | 4 SDHAP1       |
| 6.23E-209 | 0.614504261 | 0.479 | 0.164 | 2.00E-204 | 4 ARAP1        |
| 1.76E-101 | 0.613565671 | 0.774 | 0.558 | 5.65E-97  | 4 SPPL3        |
| 1.99E-140 | 0.611110527 | 0.489 | 0.217 | 6.39E-136 | 4 STK17A       |
| 1.08E-118 | 0.610663406 | 0.764 | 0.485 | 3.46E-114 | 4 TRIM2        |
| 0         | 0.605819337 | 0.419 | 0.081 | 0         | 4 AC092894.1   |
| 3.75E-79  | 0.605766357 | 0.737 | 0.545 | 1.20E-74  | 4 PPP3CA       |
| 3.66E-118 | 0.602525708 | 0.892 | 0.667 | 1.17E-113 | 4 THSD7A       |
| 1.44E-133 | 0.597917881 | 0.788 | 0.504 | 4.62E-129 | 4 DPY19L2      |
| 1.34E-178 | 0.597442628 | 0.456 | 0.166 | 4.31E-174 | 4 SHROOM2      |
| 3.56E-80  | 0.595433433 | 0.824 | 0.606 | 1.14E-75  | 4 STPG2        |
| 8.43E-111 | 0.593844619 | 0.602 | 0.346 | 2.71E-106 | 4 GOT1         |
| 1.29E-194 | 0.59292227  | 0.289 | 0.069 | 4.15E-190 | 4 CYTIP        |
| 2.12E-199 | 0.592082613 | 0.377 | 0.111 | 6.81E-195 | 4 AC007161.3   |
| 2.22E-217 | 0.590723376 | 0.416 | 0.124 | 7.14E-213 | 4 SLC25A39     |
| 2.86E-112 | 0.590666874 | 0.714 | 0.46  | 9.18E-108 | 4 RGPD8        |
| 6.70E-170 | 0.590502126 | 0.46  | 0.176 | 2.15E-165 | 4 CEP152       |
| 0         | 0.590056062 | 0.293 | 0.013 | 0         | 4 AF111167.1   |
| 2.75E-87  | 0.586278052 | 0.703 | 0.486 | 8.84E-83  | 4 PSME4        |
| 2.96E-126 | 0.585962473 | 0.495 | 0.232 | 9.50E-122 | 4 CHP1         |
| 8.94E-110 | 0.585850803 | 0.456 | 0.211 | 2.87E-105 | 4 OXCT1        |
| 1.12E-134 | 0.582419061 | 0.58  | 0.273 | 3.61E-130 | 4 PBX3         |
| 2.86E-62  | 0.581094361 | 0.632 | 0.424 | 9.20E-58  | 4 PLCL2        |
| 9.47E-272 | 0.579734442 | 0.356 | 0.078 | 3.04E-267 | 4 MAP3K20      |
| 4.96E-176 | 0.579134133 | 0.659 | 0.308 | 1.59E-171 | 4 ANKRD44      |
| 1.61E-122 | 0.579022797 | 0.5   | 0.236 | 5.18E-118 | 4 SINHCAF      |
| 0         | 0.577607498 | 0.32  | 0.057 | 0         | 4 ASB9         |
| 2.39E-117 | 0.577181403 | 0.706 | 0.454 | 7.68E-113 | 4 CDC42SE2     |
| 2.85E-141 | 0.576903069 | 0.531 | 0.237 | 9.16E-137 | 4 MTHFD1L      |
| 5.06E-99  | 0.57447394  | 0.757 | 0.503 | 1.63E-94  | 4 PACS1        |
| 6.69E-125 | 0.573675325 | 0.534 | 0.267 | 2.15E-120 | 4 SCAMP1       |
| 2.58E-116 | 0.573428008 | 0.63  | 0.363 | 8.27E-112 | 4 PTPN2        |
| 2.33E-132 | 0.573296503 | 0.575 | 0.293 | 7.49E-128 | 4 UBE2Q2P1     |
| 1.39E-144 | 0.571635298 | 0.744 | 0.435 | 4.48E-140 | 4 DOCK4        |

|           |             |       |       |           |              |
|-----------|-------------|-------|-------|-----------|--------------|
| 4.09E-106 | 0.563772351 | 0.66  | 0.399 | 1.32E-101 | 4 AF241726.1 |
| 1.06E-151 | 0.561484849 | 0.489 | 0.198 | 3.41E-147 | 4 SYK        |
| 2.22E-140 | 0.561438041 | 0.509 | 0.236 | 7.14E-136 | 4 WASHC3     |
| 2.11E-81  | 0.556384126 | 0.733 | 0.528 | 6.79E-77  | 4 LRRFIP2    |
| 2.40E-160 | 0.554645443 | 0.351 | 0.111 | 7.70E-156 | 4 GPT2       |
| 1.69E-70  | 0.554307931 | 0.409 | 0.224 | 5.44E-66  | 4 MT-ND6     |
| 2.08E-92  | 0.553345131 | 0.764 | 0.568 | 6.67E-88  | 4 WWP1       |
| 7.22E-229 | 0.553259535 | 0.331 | 0.08  | 2.32E-224 | 4 GCOM1      |
| 3.46E-90  | 0.552707397 | 0.677 | 0.468 | 1.11E-85  | 4 HMBOX1     |
| 6.27E-108 | 0.55212399  | 0.616 | 0.341 | 2.01E-103 | 4 TTC39B     |
| 1.40E-131 | 0.552079639 | 0.451 | 0.19  | 4.50E-127 | 4 OPRM1      |
| 1.88E-87  | 0.544452573 | 0.482 | 0.255 | 6.04E-83  | 4 ENOX2      |
| 4.51E-215 | 0.544302351 | 0.381 | 0.107 | 1.45E-210 | 4 ERO1A      |
| 7.21E-143 | 0.542763719 | 0.949 | 0.821 | 2.32E-138 | 4 MACF1      |
| 4.69E-97  | 0.542451545 | 0.63  | 0.381 | 1.51E-92  | 4 LNPEP      |
| 2.95E-91  | 0.540849488 | 0.789 | 0.558 | 9.46E-87  | 4 MTSS1      |
| 1.75E-248 | 0.539626078 | 0.427 | 0.117 | 5.62E-244 | 4 LGALS3     |
| 9.17E-130 | 0.538104542 | 0.945 | 0.781 | 2.94E-125 | 4 NR3C2      |
| 1.45E-51  | 0.535702961 | 0.52  | 0.347 | 4.66E-47  | 4 NFKB1      |
| 4.43E-93  | 0.535198661 | 0.799 | 0.539 | 1.42E-88  | 4 STK33      |
| 0         | 0.533239142 | 0.309 | 0.044 | 0         | 4 AC078883.1 |
| 2.99E-202 | 0.531791067 | 0.963 | 0.763 | 9.61E-198 | 4 ARL15      |
| 1.83E-118 | 0.531546505 | 0.598 | 0.301 | 5.88E-114 | 4 FAM110B    |
| 2.51E-181 | 0.531135998 | 0.467 | 0.17  | 8.07E-177 | 4 SPECC1     |
| 1.37E-142 | 0.529501324 | 0.41  | 0.16  | 4.40E-138 | 4 ANP32A     |
| 1.20E-82  | 0.52859311  | 0.745 | 0.564 | 3.87E-78  | 4 RICTOR     |
| 2.48E-86  | 0.527674974 | 0.791 | 0.591 | 7.98E-82  | 4 CAMTA1     |
| 1.62E-143 | 0.52727801  | 0.277 | 0.081 | 5.22E-139 | 4 FAM184B    |
| 5.64E-95  | 0.526262769 | 0.441 | 0.213 | 1.81E-90  | 4 RAPIGAP    |
| 7.98E-160 | 0.524570698 | 0.391 | 0.138 | 2.56E-155 | 4 FAM3C      |
| 2.08E-80  | 0.524135122 | 0.826 | 0.643 | 6.67E-76  | 4 PRKCE      |
| 3.54E-79  | 0.524042464 | 0.705 | 0.484 | 1.14E-74  | 4 UMAD1      |
| 2.34E-126 | 0.522673515 | 0.496 | 0.23  | 7.51E-122 | 4 PSMG4      |
| 5.18E-96  | 0.521834653 | 0.766 | 0.532 | 1.66E-91  | 4 FAM120B    |
| 2.94E-87  | 0.519757457 | 0.753 | 0.528 | 9.43E-83  | 4 XPR1       |
| 1.75E-113 | 0.518766051 | 0.386 | 0.163 | 5.62E-109 | 4 HERPUD1    |
| 1.16E-13  | 0.515515136 | 0.345 | 0.257 | 3.74E-09  | 4 HSP90B1    |
| 6.53E-122 | 0.51364664  | 0.462 | 0.21  | 2.10E-117 | 4 SELENOI    |
| 4.51E-114 | 0.511141907 | 0.504 | 0.243 | 1.45E-109 | 4 GPD2       |
| 7.40E-65  | 0.510821212 | 0.703 | 0.503 | 2.38E-60  | 4 ELF1       |
| 2.56E-91  | 0.510771413 | 0.582 | 0.316 | 8.22E-87  | 4 AC040174.1 |
| 3.17E-85  | 0.50845362  | 0.636 | 0.397 | 1.02E-80  | 4 SPTAN1     |
| 6.04E-115 | 0.506666337 | 0.484 | 0.233 | 1.94E-110 | 4 INTS9      |
| 6.44E-115 | 0.506665157 | 0.908 | 0.791 | 2.07E-110 | 4 SBF2       |
| 1.64E-73  | 0.506406094 | 0.843 | 0.707 | 5.28E-69  | 4 NCOA2      |
| 3.69E-76  | 0.505612693 | 0.719 | 0.48  | 1.19E-71  | 4 NOS1AP     |
| 1.18E-106 | 0.502485518 | 0.582 | 0.323 | 3.80E-102 | 4 LINC00869  |
| 8.49E-265 | 0.501858823 | 0.316 | 0.063 | 2.73E-260 | 4 LAMA3      |
| 1.23E-123 | 0.499710764 | 0.42  | 0.177 | 3.94E-119 | 4 MFAP3      |
| 5.11E-99  | 0.499433291 | 0.703 | 0.426 | 1.64E-94  | 4 MPC1       |
| 4.80E-131 | 0.497393957 | 0.734 | 0.383 | 1.54E-126 | 4 CLCNKA     |



|           |             |       |       |           |               |
|-----------|-------------|-------|-------|-----------|---------------|
| 2.60E-81  | 0.497262742 | 0.673 | 0.426 | 8.35E-77  | 4 RHBDD1      |
| 4.39E-113 | 0.496991945 | 0.47  | 0.222 | 1.41E-108 | 4 MAP1LC3A    |
| 4.92E-101 | 0.496326515 | 0.605 | 0.352 | 1.58E-96  | 4 PITPNB      |
| 2.34E-139 | 0.494629867 | 0.988 | 0.965 | 7.50E-135 | 4 ZBTB20      |
| 5.91E-115 | 0.493556283 | 0.731 | 0.427 | 1.90E-110 | 4 C11orf80    |
| 1.50E-101 | 0.492903996 | 0.568 | 0.313 | 4.81E-97  | 4 PTPN21      |
| 2.77E-103 | 0.491575113 | 0.43  | 0.201 | 8.89E-99  | 4 PLEKHA8     |
| 1.02E-161 | 0.491449731 | 0.988 | 0.748 | 3.27E-157 | 4 AC019197.1  |
| 5.04E-91  | 0.49055293  | 0.66  | 0.414 | 1.62E-86  | 4 ATL2        |
| 3.00E-102 | 0.489481428 | 0.543 | 0.277 | 9.63E-98  | 4 SH3BP4      |
| 3.11E-84  | 0.489344337 | 0.723 | 0.48  | 9.98E-80  | 4 ZNRF3       |
| 1.14E-51  | 0.489088573 | 0.465 | 0.293 | 3.65E-47  | 4 ANKH        |
| 3.14E-82  | 0.483914495 | 0.67  | 0.447 | 1.01E-77  | 4 SNX24       |
| 1.92E-116 | 0.483883192 | 0.439 | 0.19  | 6.16E-112 | 4 CKB         |
| 4.23E-71  | 0.48065383  | 0.692 | 0.472 | 1.36E-66  | 4 SGK3        |
| 1.47E-122 | 0.479380451 | 0.432 | 0.189 | 4.73E-118 | 4 METAP1      |
| 1.10E-93  | 0.478726733 | 0.812 | 0.574 | 3.53E-89  | 4 MIR99AHG    |
| 1.23E-105 | 0.475064174 | 0.657 | 0.389 | 3.94E-101 | 4 VPS37B      |
| 3.20E-90  | 0.472926499 | 0.447 | 0.216 | 1.03E-85  | 4 AC010894.2  |
| 1.01E-87  | 0.472549567 | 0.739 | 0.493 | 3.24E-83  | 4 RALGPS1     |
| 1.80E-64  | 0.472257784 | 0.652 | 0.438 | 5.78E-60  | 4 CLYBL       |
| 6.65E-95  | 0.471392886 | 0.707 | 0.452 | 2.14E-90  | 4 CDC42BPB    |
| 2.15E-90  | 0.470048099 | 0.619 | 0.37  | 6.92E-86  | 4 MRPS5       |
| 2.68E-217 | 0.469178405 | 0.293 | 0.066 | 8.60E-213 | 4 CEP85       |
| 1.44E-132 | 0.469132518 | 0.412 | 0.163 | 4.62E-128 | 4 KCNC4       |
| 5.41E-75  | 0.468378513 | 0.823 | 0.604 | 1.74E-70  | 4 SULT1C2     |
| 1.41E-148 | 0.467722044 | 0.413 | 0.151 | 4.53E-144 | 4 DLC1        |
| 3.73E-69  | 0.466591178 | 0.685 | 0.475 | 1.20E-64  | 4 MAN2A1      |
| 5.78E-82  | 0.466470778 | 0.572 | 0.339 | 1.86E-77  | 4 RNF169      |
| 2.26E-141 | 0.465508414 | 0.488 | 0.195 | 7.25E-137 | 4 TCF7L1      |
| 3.63E-83  | 0.464289933 | 0.592 | 0.355 | 1.17E-78  | 4 MBP         |
| 3.25E-132 | 0.463978054 | 0.428 | 0.174 | 1.04E-127 | 4 DDX52       |
| 4.24E-122 | 0.462871853 | 0.318 | 0.11  | 1.36E-117 | 4 PTGFR       |
| 2.57E-58  | 0.460625723 | 0.526 | 0.329 | 8.26E-54  | 4 ATP8A1      |
| 3.79E-67  | 0.459550094 | 0.773 | 0.561 | 1.22E-62  | 4 FAM160A1    |
| 5.27E-81  | 0.458358881 | 0.505 | 0.275 | 1.69E-76  | 4 ADAM22      |
| 2.28E-79  | 0.458255678 | 0.714 | 0.468 | 7.33E-75  | 4 FMNL2       |
| 4.41E-68  | 0.455901541 | 0.66  | 0.449 | 1.42E-63  | 4 FRK         |
| 6.05E-79  | 0.455732464 | 0.846 | 0.682 | 1.94E-74  | 4 GNAQ        |
| 3.46E-118 | 0.453363727 | 0.783 | 0.435 | 1.11E-113 | 4 SCN2A       |
| 6.17E-100 | 0.452828137 | 0.459 | 0.222 | 1.98E-95  | 4 KIF3B       |
| 7.13E-135 | 0.452701417 | 0.266 | 0.078 | 2.29E-130 | 4 AC241377.2  |
| 1.07E-185 | 0.452540705 | 0.27  | 0.064 | 3.44E-181 | 4 TMEM38A     |
| 1.23E-87  | 0.452085963 | 0.534 | 0.294 | 3.94E-83  | 4 CPPED1      |
| 1.84E-90  | 0.451341708 | 0.523 | 0.284 | 5.92E-86  | 4 LINC00623   |
| 4.54E-76  | 0.451339505 | 0.678 | 0.456 | 1.46E-71  | 4 CAPZB       |
| 5.53E-101 | 0.450700696 | 0.449 | 0.212 | 1.78E-96  | 4 CBR3-AS1    |
| 9.58E-110 | 0.450329048 | 0.394 | 0.169 | 3.08E-105 | 4 PEX7        |
| 6.22E-89  | 0.449712998 | 0.348 | 0.152 | 2.00E-84  | 4 GCGR        |
| 3.68E-89  | 0.448407073 | 0.48  | 0.25  | 1.18E-84  | 4 MYO19       |
| 4.01E-65  | 0.446684922 | 0.698 | 0.474 | 1.29E-60  | 4 SLC44A3-AS1 |

|           |             |       |       |           |              |
|-----------|-------------|-------|-------|-----------|--------------|
| 9.36E-87  | 0.446427335 | 0.343 | 0.152 | 3.01E-82  | 4 IQSEC1     |
| 1.63E-76  | 0.445431916 | 0.55  | 0.317 | 5.22E-72  | 4 MCC        |
| 2.23E-88  | 0.444680438 | 0.445 | 0.218 | 7.16E-84  | 4 ARSJ       |
| 7.13E-69  | 0.442718258 | 0.7   | 0.464 | 2.29E-64  | 4 FAAH2      |
| 2.17E-46  | 0.441981929 | 0.725 | 0.555 | 6.98E-42  | 4 DST        |
| 1.47E-179 | 0.441939909 | 0.259 | 0.06  | 4.72E-175 | 4 LPAR1      |
| 1.64E-105 | 0.441701752 | 0.422 | 0.191 | 5.27E-101 | 4 CD9        |
| 4.57E-81  | 0.440998053 | 0.413 | 0.207 | 1.47E-76  | 4 AC006504.5 |
| 5.93E-62  | 0.439820608 | 0.75  | 0.559 | 1.90E-57  | 4 SGMS1      |
| 1.76E-154 | 0.439598617 | 0.367 | 0.122 | 5.66E-150 | 4 PLAG1      |
| 7.21E-93  | 0.438096108 | 0.748 | 0.519 | 2.31E-88  | 4 ANKS1A     |
| 8.93E-69  | 0.436666648 | 0.778 | 0.605 | 2.87E-64  | 4 GPATCH8    |
| 8.77E-56  | 0.434816478 | 0.669 | 0.48  | 2.82E-51  | 4 CLEC16A    |
| 7.15E-52  | 0.434338876 | 0.743 | 0.552 | 2.30E-47  | 4 FNIP2      |
| 2.56E-85  | 0.434267026 | 0.423 | 0.209 | 8.22E-81  | 4 SERGEF     |
| 2.57E-168 | 0.433794064 | 0.329 | 0.097 | 8.25E-164 | 4 CAPN13     |
| 3.48E-118 | 0.433191971 | 0.354 | 0.136 | 1.12E-113 | 4 ST14       |
| 1.55E-106 | 0.432674076 | 0.418 | 0.185 | 4.98E-102 | 4 TBC1D24    |
| 2.00E-75  | 0.429985542 | 0.679 | 0.421 | 6.43E-71  | 4 ALOX12P2   |
| 1.51E-61  | 0.429865973 | 0.632 | 0.412 | 4.85E-57  | 4 XRRRA1     |
| 2.59E-82  | 0.429315038 | 0.582 | 0.342 | 8.33E-78  | 4 GABARAPL1  |
| 5.82E-76  | 0.428212926 | 0.668 | 0.433 | 1.87E-71  | 4 RIN2       |
| 1.99E-84  | 0.428138005 | 0.764 | 0.523 | 6.40E-80  | 4 CYRIB      |
| 8.58E-10  | 0.427853925 | 0.63  | 0.573 | 2.76E-05  | 4 MT-CO1     |
| 6.15E-85  | 0.427632798 | 0.938 | 0.849 | 1.98E-80  | 4 RERE       |
| 2.32E-61  | 0.427621598 | 0.732 | 0.549 | 7.46E-57  | 4 KIF1B      |
| 9.01E-78  | 0.427028922 | 0.392 | 0.188 | 2.89E-73  | 4 MAP2K6     |
| 1.15E-68  | 0.426243722 | 0.753 | 0.553 | 3.70E-64  | 4 COG5       |
| 1.76E-66  | 0.425427778 | 0.463 | 0.266 | 5.64E-62  | 4 CD24       |
| 2.74E-78  | 0.424742459 | 0.876 | 0.731 | 8.80E-74  | 4 NFAT5      |
| 4.55E-63  | 0.421736727 | 0.511 | 0.301 | 1.46E-58  | 4 SLC22A15   |
| 9.42E-108 | 0.419871874 | 0.395 | 0.167 | 3.03E-103 | 4 ALPK3      |
| 1.12E-93  | 0.419783477 | 0.427 | 0.205 | 3.59E-89  | 4 WDR1       |
| 1.52E-103 | 0.419714678 | 0.361 | 0.151 | 4.90E-99  | 4 COX7A2L    |
| 3.39E-166 | 0.418534235 | 0.327 | 0.093 | 1.09E-161 | 4 FGF12      |
| 5.67E-63  | 0.417551018 | 0.873 | 0.741 | 1.82E-58  | 4 FBXL17     |
| 6.78E-79  | 0.417295065 | 0.465 | 0.254 | 2.18E-74  | 4 PLEKHB2    |
| 8.10E-172 | 0.417203385 | 0.252 | 0.061 | 2.60E-167 | 4 GNP NAT1   |
| 7.69E-64  | 0.416250794 | 0.775 | 0.574 | 2.47E-59  | 4 CPEB3      |
| 2.13E-60  | 0.415516834 | 0.464 | 0.277 | 6.84E-56  | 4 USP54      |
| 2.07E-89  | 0.413465068 | 0.389 | 0.18  | 6.63E-85  | 4 EPCAM-DT   |
| 1.19E-92  | 0.412676023 | 0.436 | 0.207 | 3.84E-88  | 4 NR4A1      |
| 5.54E-120 | 0.41225252  | 0.305 | 0.106 | 1.78E-115 | 4 SAV1       |
| 2.87E-116 | 0.411941753 | 0.323 | 0.118 | 9.22E-112 | 4 LONRF2     |
| 4.30E-77  | 0.411819954 | 0.675 | 0.415 | 1.38E-72  | 4 SCNN1A     |
| 3.24E-95  | 0.411558182 | 0.441 | 0.213 | 1.04E-90  | 4 TFEB       |
| 1.15E-63  | 0.41056719  | 0.637 | 0.423 | 3.71E-59  | 4 ARHGAP21   |
| 5.24E-59  | 0.410186632 | 0.656 | 0.448 | 1.68E-54  | 4 ZMIZ1      |
| 4.20E-80  | 0.40977155  | 0.532 | 0.308 | 1.35E-75  | 4 NHLRC2     |
| 1.16E-55  | 0.408693465 | 0.344 | 0.178 | 3.72E-51  | 4 HSPA1B     |
| 7.20E-92  | 0.408691985 | 0.933 | 0.823 | 2.31E-87  | 4 PTPRG      |

|           |             |       |       |           |              |
|-----------|-------------|-------|-------|-----------|--------------|
| 1.95E-68  | 0.408323708 | 0.671 | 0.461 | 6.26E-64  | 4 FAM13B     |
| 5.85E-69  | 0.407213368 | 0.587 | 0.375 | 1.88E-64  | 4 STRN       |
| 1.14E-64  | 0.406080665 | 0.727 | 0.523 | 3.65E-60  | 4 RNF38      |
| 1.29E-73  | 0.405758252 | 0.705 | 0.475 | 4.13E-69  | 4 MTUS1      |
| 9.05E-51  | 0.403942403 | 0.561 | 0.373 | 2.91E-46  | 4 PDZD8      |
| 1.75E-133 | 0.40370475  | 0.344 | 0.121 | 5.64E-129 | 4 RNASEK     |
| 2.21E-56  | 0.403520955 | 0.705 | 0.522 | 7.10E-52  | 4 ZFAND6     |
| 4.20E-103 | 0.402743836 | 0.471 | 0.225 | 1.35E-98  | 4 AC010210.1 |
| 5.68E-58  | 0.40137518  | 0.741 | 0.56  | 1.82E-53  | 4 PHKB       |
| 2.64E-54  | 0.399633535 | 0.391 | 0.219 | 8.48E-50  | 4 MDFIC      |
| 3.08E-59  | 0.399328545 | 0.582 | 0.376 | 9.90E-55  | 4 CPT1A      |
| 8.44E-61  | 0.398728692 | 0.279 | 0.127 | 2.71E-56  | 4 HSPA1A     |
| 1.42E-93  | 0.39816272  | 0.407 | 0.19  | 4.58E-89  | 4 PRDM4      |
| 3.97E-56  | 0.397573757 | 0.266 | 0.126 | 1.27E-51  | 4 EFEMP1     |
| 4.83E-57  | 0.397246155 | 0.725 | 0.536 | 1.55E-52  | 4 REV1       |
| 3.06E-66  | 0.397083715 | 0.796 | 0.593 | 9.84E-62  | 4 TBL1X      |
| 1.59E-78  | 0.396985352 | 0.832 | 0.638 | 5.10E-74  | 4 CPEB4      |
| 1.53E-55  | 0.396814615 | 0.887 | 0.774 | 4.90E-51  | 4 SETBP1     |
| 3.16E-100 | 0.396614048 | 0.301 | 0.114 | 1.01E-95  | 4 AMPD3      |
| 1.50E-132 | 0.39442567  | 0.745 | 0.385 | 4.81E-128 | 4 GRB10      |
| 2.53E-91  | 0.392219574 | 0.33  | 0.136 | 8.11E-87  | 4 CAMK2N1    |
| 8.45E-65  | 0.391674049 | 0.737 | 0.522 | 2.71E-60  | 4 DPYD       |
| 6.99E-83  | 0.390890666 | 0.392 | 0.189 | 2.25E-78  | 4 MKNK1      |
| 6.66E-68  | 0.390656999 | 0.748 | 0.543 | 2.14E-63  | 4 SRSF5      |
| 3.52E-53  | 0.389719229 | 0.74  | 0.562 | 1.13E-48  | 4 MRTFB      |
| 1.76E-44  | 0.389567888 | 0.757 | 0.608 | 5.64E-40  | 4 SPAG9      |
| 1.93E-40  | 0.389456145 | 0.821 | 0.681 | 6.21E-36  | 4 MTR        |
| 1.72E-54  | 0.388089877 | 0.526 | 0.336 | 5.53E-50  | 4 DNAJC3     |
| 6.57E-60  | 0.387781775 | 0.441 | 0.255 | 2.11E-55  | 4 SMARCA1    |
| 7.16E-81  | 0.387745186 | 0.409 | 0.199 | 2.30E-76  | 4 AL713999.2 |
| 1.44E-57  | 0.387420711 | 0.718 | 0.512 | 4.63E-53  | 4 GRAMD2B    |
| 1.14E-54  | 0.387338523 | 0.665 | 0.465 | 3.66E-50  | 4 CDK8       |
| 9.35E-94  | 0.387229867 | 0.352 | 0.154 | 3.00E-89  | 4 EXTL2      |
| 1.92E-53  | 0.387027991 | 0.593 | 0.391 | 6.15E-49  | 4 PHACTR2    |
| 3.34E-98  | 0.386717653 | 0.357 | 0.151 | 1.07E-93  | 4 PLEKHH1    |
| 8.29E-71  | 0.385431174 | 0.499 | 0.285 | 2.66E-66  | 4 LPGAT1     |
| 5.41E-45  | 0.384799831 | 0.68  | 0.521 | 1.74E-40  | 4 USP3       |
| 9.62E-68  | 0.38423448  | 0.479 | 0.27  | 3.09E-63  | 4 PKM        |
| 6.87E-77  | 0.382730342 | 0.388 | 0.186 | 2.21E-72  | 4 AC016705.2 |
| 5.94E-63  | 0.382711375 | 0.435 | 0.245 | 1.91E-58  | 4 THEM4      |
| 6.97E-97  | 0.381470896 | 0.377 | 0.164 | 2.24E-92  | 4 DOP1B      |
| 1.79E-73  | 0.38134432  | 0.45  | 0.238 | 5.76E-69  | 4 AC006994.1 |
| 2.32E-73  | 0.380905013 | 0.867 | 0.649 | 7.44E-69  | 4 LIMCH1     |
| 1.62E-124 | 0.379221129 | 0.253 | 0.074 | 5.20E-120 | 4 CPAMD8     |
| 5.46E-63  | 0.379181558 | 0.4   | 0.218 | 1.75E-58  | 4 RALA       |
| 2.60E-111 | 0.378206896 | 0.414 | 0.176 | 8.36E-107 | 4 MVB12B     |
| 4.14E-61  | 0.377449109 | 0.639 | 0.432 | 1.33E-56  | 4 STK24      |
| 3.04E-110 | 0.37624319  | 0.333 | 0.127 | 9.76E-106 | 4 ACADL      |
| 3.91E-41  | 0.37585877  | 0.673 | 0.521 | 1.26E-36  | 4 DCAF6      |
| 1.79E-61  | 0.375679784 | 0.341 | 0.168 | 5.73E-57  | 4 ANGPT1     |
| 5.12E-55  | 0.375645249 | 0.824 | 0.684 | 1.64E-50  | 4 RALGAPA1   |

|           |             |       |       |           |             |
|-----------|-------------|-------|-------|-----------|-------------|
| 6.13E-81  | 0.375544686 | 0.414 | 0.206 | 1.97E-76  | 4 NF2       |
| 4.27E-81  | 0.375503154 | 0.664 | 0.396 | 1.37E-76  | 4 ARHGEF38  |
| 2.68E-52  | 0.37544128  | 0.705 | 0.515 | 8.60E-48  | 4 JARID2    |
| 1.94E-110 | 0.375349165 | 0.281 | 0.096 | 6.23E-106 | 4 FA2H      |
| 5.33E-77  | 0.373554666 | 0.489 | 0.272 | 1.71E-72  | 4 HADHB     |
| 9.62E-114 | 0.37281538  | 0.325 | 0.121 | 3.09E-109 | 4 PDIA6     |
| 2.17E-123 | 0.372105941 | 0.324 | 0.112 | 6.97E-119 | 4 HLA-B     |
| 6.71E-40  | 0.371834602 | 0.845 | 0.705 | 2.15E-35  | 4 MACROD2   |
| 3.03E-53  | 0.371129586 | 0.794 | 0.614 | 9.73E-49  | 4 DDX5      |
| 9.45E-64  | 0.370708376 | 0.537 | 0.327 | 3.04E-59  | 4 REEP3     |
| 1.52E-46  | 0.370245536 | 0.605 | 0.404 | 4.89E-42  | 4 TMEM51    |
| 3.52E-47  | 0.370047989 | 0.453 | 0.279 | 1.13E-42  | 4 ZSWIM5    |
| 3.99E-85  | 0.369555407 | 0.412 | 0.203 | 1.28E-80  | 4 CLN8      |
| 4.47E-65  | 0.367129096 | 0.442 | 0.244 | 1.43E-60  | 4 TRAF3     |
| 3.42E-50  | 0.367094059 | 0.811 | 0.668 | 1.10E-45  | 4 EXT1      |
| 2.75E-49  | 0.3670086   | 0.725 | 0.562 | 8.84E-45  | 4 FBXW11    |
| 1.15E-64  | 0.365069504 | 0.529 | 0.317 | 3.71E-60  | 4 PISD      |
| 2.27E-138 | 0.364498213 | 0.295 | 0.091 | 7.28E-134 | 4 MINDY1    |
| 5.60E-52  | 0.363924628 | 0.644 | 0.456 | 1.80E-47  | 4 RNGTT     |
| 1.43E-72  | 0.363600124 | 0.486 | 0.272 | 4.60E-68  | 4 YWHAQ     |
| 4.23E-37  | 0.363458451 | 0.587 | 0.423 | 1.36E-32  | 4 VCL       |
| 3.64E-42  | 0.362760498 | 0.709 | 0.531 | 1.17E-37  | 4 TULP4     |
| 1.94E-76  | 0.362403247 | 0.379 | 0.184 | 6.23E-72  | 4 JADE3     |
| 3.72E-151 | 0.362364181 | 0.26  | 0.069 | 1.19E-146 | 4 DNAI3     |
| 6.49E-69  | 0.362345961 | 0.669 | 0.465 | 2.09E-64  | 4 RAP1B     |
| 1.01E-62  | 0.36116331  | 0.748 | 0.53  | 3.23E-58  | 4 CTDSPL    |
| 4.63E-86  | 0.360809236 | 0.422 | 0.203 | 1.49E-81  | 4 TSPAN14   |
| 2.64E-45  | 0.360759927 | 0.72  | 0.541 | 8.46E-41  | 4 EPB41L4A  |
| 2.03E-71  | 0.359331525 | 0.366 | 0.178 | 6.53E-67  | 4 ULK1      |
| 1.30E-106 | 0.359039067 | 0.259 | 0.084 | 4.17E-102 | 4 MAP2      |
| 8.28E-73  | 0.358677691 | 0.578 | 0.343 | 2.66E-68  | 4 SPTLC3    |
| 1.81E-84  | 0.358463179 | 0.393 | 0.186 | 5.81E-80  | 4 RGPD6     |
| 5.09E-65  | 0.358327153 | 0.455 | 0.256 | 1.64E-60  | 4 TBC1D12   |
| 1.26E-53  | 0.358260782 | 0.719 | 0.519 | 4.05E-49  | 4 KIF16B    |
| 1.26E-108 | 0.356970247 | 0.552 | 0.273 | 4.05E-104 | 4 CASC15    |
| 1.83E-72  | 0.35650012  | 0.388 | 0.194 | 5.88E-68  | 4 CAB39L    |
| 3.68E-92  | 0.355966272 | 0.429 | 0.197 | 1.18E-87  | 4 TLE1      |
| 3.97E-46  | 0.355757654 | 0.78  | 0.632 | 1.28E-41  | 4 QKI       |
| 9.62E-62  | 0.355728581 | 0.406 | 0.223 | 3.09E-57  | 4 TTC1      |
| 2.10E-60  | 0.354976101 | 0.678 | 0.465 | 6.74E-56  | 4 STX18     |
| 3.97E-95  | 0.354065042 | 0.337 | 0.141 | 1.28E-90  | 4 FYCO1     |
| 4.52E-59  | 0.352654646 | 0.649 | 0.428 | 1.45E-54  | 4 RGL3      |
| 1.74E-41  | 0.350215077 | 0.783 | 0.629 | 5.57E-37  | 4 TMCC1     |
| 2.91E-55  | 0.349551769 | 0.671 | 0.476 | 9.34E-51  | 4 KIDINS220 |
| 1.75E-44  | 0.348493843 | 0.275 | 0.143 | 5.63E-40  | 4 ARRDC4    |
| 6.30E-91  | 0.347054844 | 0.262 | 0.096 | 2.02E-86  | 4 FAM3B     |
| 1.22E-23  | 0.346153388 | 0.364 | 0.25  | 3.92E-19  | 4 XIST      |
| 6.28E-70  | 0.345535741 | 0.402 | 0.203 | 2.02E-65  | 4 SGSM2     |
| 2.27E-51  | 0.345241039 | 0.708 | 0.51  | 7.29E-47  | 4 EPC2      |
| 4.84E-38  | 0.344548647 | 0.568 | 0.406 | 1.55E-33  | 4 CYTH1     |
| 7.69E-51  | 0.343552138 | 0.573 | 0.383 | 2.47E-46  | 4 STT3B     |

|           |             |       |       |           |              |
|-----------|-------------|-------|-------|-----------|--------------|
| 2.41E-39  | 0.343305076 | 0.815 | 0.711 | 7.74E-35  | 4 MKLN1      |
| 9.16E-45  | 0.342010893 | 0.267 | 0.138 | 2.94E-40  | 4 LINC01135  |
| 8.50E-126 | 0.34161184  | 0.299 | 0.1   | 2.73E-121 | 4 GOLGA2P10  |
| 2.78E-43  | 0.340816184 | 0.452 | 0.286 | 8.92E-39  | 4 KIF9-AS1   |
| 4.78E-60  | 0.340142939 | 0.455 | 0.266 | 1.53E-55  | 4 RPA3       |
| 1.05E-52  | 0.340038354 | 0.66  | 0.451 | 3.36E-48  | 4 RNF130     |
| 3.98E-50  | 0.33971713  | 0.511 | 0.327 | 1.28E-45  | 4 GSPT1      |
| 3.29E-61  | 0.337663057 | 0.53  | 0.317 | 1.06E-56  | 4 WBP1L      |
| 9.65E-59  | 0.337561765 | 0.62  | 0.397 | 3.10E-54  | 4 LINC01138  |
| 4.11E-45  | 0.337532969 | 0.666 | 0.497 | 1.32E-40  | 4 ECPAS      |
| 5.11E-51  | 0.337215122 | 0.533 | 0.345 | 1.64E-46  | 4 BCL2L13    |
| 5.88E-51  | 0.335575235 | 0.551 | 0.366 | 1.89E-46  | 4 USO1       |
| 4.64E-72  | 0.335407171 | 0.299 | 0.131 | 1.49E-67  | 4 SPTBN2     |
| 1.63E-49  | 0.335149494 | 0.839 | 0.696 | 5.23E-45  | 4 NCOR1      |
| 3.84E-85  | 0.334475182 | 0.36  | 0.164 | 1.23E-80  | 4 ELK4       |
| 3.50E-60  | 0.333724747 | 0.447 | 0.254 | 1.12E-55  | 4 UBE2Q2P2   |
| 4.55E-91  | 0.33284456  | 0.372 | 0.163 | 1.46E-86  | 4 NSUN5P1    |
| 7.56E-49  | 0.332323582 | 0.647 | 0.454 | 2.43E-44  | 4 SREBF2     |
| 5.50E-111 | 0.331473802 | 0.292 | 0.103 | 1.77E-106 | 4 AC093525.2 |
| 3.85E-49  | 0.331337277 | 0.265 | 0.129 | 1.24E-44  | 4 KLRD1      |
| 4.05E-51  | 0.330469104 | 0.584 | 0.381 | 1.30E-46  | 4 GRAMD1C    |
| 1.09E-56  | 0.327619027 | 0.418 | 0.235 | 3.52E-52  | 4 MAP2K1     |
| 1.45E-64  | 0.325884567 | 0.725 | 0.514 | 4.66E-60  | 4 LIFR       |
| 1.54E-61  | 0.325672164 | 0.478 | 0.28  | 4.96E-57  | 4 FUBP3      |
| 4.63E-48  | 0.325381201 | 0.493 | 0.312 | 1.49E-43  | 4 CCNI       |
| 1.20E-51  | 0.324716575 | 0.628 | 0.433 | 3.84E-47  | 4 AC132008.2 |
| 1.48E-77  | 0.324666086 | 0.274 | 0.112 | 4.76E-73  | 4 BSG        |
| 3.76E-35  | 0.324551719 | 0.64  | 0.484 | 1.21E-30  | 4 DIAPH1     |
| 3.85E-61  | 0.324234191 | 0.336 | 0.166 | 1.24E-56  | 4 FAM169A    |
| 5.03E-57  | 0.321828847 | 0.313 | 0.156 | 1.61E-52  | 4 HMGCR      |
| 9.44E-53  | 0.321784117 | 0.589 | 0.392 | 3.03E-48  | 4 TM9SF3     |
| 2.88E-88  | 0.321440416 | 0.327 | 0.136 | 9.25E-84  | 4 HLA-C      |
| 2.12E-52  | 0.321336585 | 0.582 | 0.377 | 6.82E-48  | 4 TMLHE-AS1  |
| 6.68E-51  | 0.320445116 | 0.513 | 0.322 | 2.14E-46  | 4 GLUD1      |
| 5.80E-37  | 0.320425708 | 0.605 | 0.436 | 1.86E-32  | 4 GTF2IRD2B  |
| 2.67E-50  | 0.31931626  | 0.54  | 0.35  | 8.56E-46  | 4 PDHX       |
| 8.73E-53  | 0.318958349 | 0.596 | 0.4   | 2.80E-48  | 4 BTAF1      |
| 2.98E-43  | 0.31820093  | 0.757 | 0.591 | 9.57E-39  | 4 ZRANB2     |
| 3.47E-53  | 0.317784537 | 0.34  | 0.18  | 1.12E-48  | 4 HSPH1      |
| 1.66E-60  | 0.31750404  | 0.288 | 0.133 | 5.32E-56  | 4 SLC16A5    |
| 7.71E-45  | 0.316179024 | 0.632 | 0.448 | 2.48E-40  | 4 JAK1       |
| 2.88E-42  | 0.315714213 | 0.619 | 0.431 | 9.26E-38  | 4 SVIL-AS1   |
| 4.34E-64  | 0.315712088 | 0.318 | 0.151 | 1.40E-59  | 4 ABHD3      |
| 1.03E-62  | 0.315130677 | 0.639 | 0.406 | 3.31E-58  | 4 GSE1       |
| 7.61E-103 | 0.313586339 | 0.306 | 0.114 | 2.44E-98  | 4 ATP6V0B    |
| 4.23E-40  | 0.313156668 | 0.537 | 0.365 | 1.36E-35  | 4 FAM133B    |
| 6.10E-67  | 0.312387328 | 0.354 | 0.177 | 1.96E-62  | 4 INSIG2     |
| 2.56E-64  | 0.312321244 | 0.376 | 0.193 | 8.22E-60  | 4 KREMEN1    |
| 3.06E-62  | 0.311808765 | 0.685 | 0.425 | 9.83E-58  | 4 PRDM16     |
| 1.24E-77  | 0.310698317 | 0.291 | 0.123 | 3.99E-73  | 4 ARL6       |
| 9.96E-39  | 0.30995132  | 0.775 | 0.637 | 3.20E-34  | 4 ARIH1      |

|           |             |       |       |           |              |
|-----------|-------------|-------|-------|-----------|--------------|
| 2.48E-43  | 0.308866988 | 0.724 | 0.548 | 7.97E-39  | 4 ELF2       |
| 1.22E-58  | 0.30745665  | 0.414 | 0.228 | 3.92E-54  | 4 RGPD2      |
| 6.58E-49  | 0.307421727 | 0.416 | 0.246 | 2.11E-44  | 4 DEPDC5     |
| 1.34E-52  | 0.307263317 | 0.348 | 0.186 | 4.31E-48  | 4 WLS        |
| 9.96E-55  | 0.307148813 | 0.393 | 0.213 | 3.20E-50  | 4 MAN1C1     |
| 1.89E-74  | 0.30546916  | 0.3   | 0.13  | 6.08E-70  | 4 DUSP15     |
| 4.38E-61  | 0.304992752 | 0.382 | 0.2   | 1.41E-56  | 4 CUEDC1     |
| 2.94E-53  | 0.304657752 | 0.909 | 0.829 | 9.44E-49  | 4 JMJD1C     |
| 1.77E-43  | 0.304162243 | 0.651 | 0.464 | 5.69E-39  | 4 ASCC3      |
| 3.89E-62  | 0.303986708 | 0.366 | 0.19  | 1.25E-57  | 4 CRY2       |
| 7.50E-46  | 0.303916315 | 0.529 | 0.358 | 2.41E-41  | 4 GOLPH3     |
| 4.09E-49  | 0.303796475 | 0.625 | 0.421 | 1.31E-44  | 4 CMTM4      |
| 3.83E-42  | 0.303625753 | 0.577 | 0.392 | 1.23E-37  | 4 GTF2IRD2   |
| 1.20E-82  | 0.302956026 | 0.43  | 0.205 | 3.85E-78  | 4 B4GALNT3   |
| 7.51E-42  | 0.302747473 | 0.749 | 0.588 | 2.41E-37  | 4 RBFOX2     |
| 3.63E-56  | 0.302514952 | 0.559 | 0.342 | 1.16E-51  | 4 SCML1      |
| 2.68E-37  | 0.301905869 | 0.685 | 0.504 | 8.62E-33  | 4 MAN1A1     |
| 2.24E-37  | 0.301438897 | 0.801 | 0.667 | 7.20E-33  | 4 DYRK1A     |
| 8.22E-59  | 0.301302272 | 0.43  | 0.243 | 2.64E-54  | 4 SHTN1      |
| 1.09E-74  | 0.301055824 | 0.268 | 0.109 | 3.51E-70  | 4 AC025279.1 |
| 3.73E-67  | 0.298565989 | 0.253 | 0.106 | 1.20E-62  | 4 AL513164.1 |
| 5.91E-43  | 0.298368586 | 0.559 | 0.384 | 1.90E-38  | 4 ACTR3      |
| 5.23E-45  | 0.2972522   | 0.537 | 0.356 | 1.68E-40  | 4 NPTN       |
| 4.05E-39  | 0.296637643 | 0.751 | 0.588 | 1.30E-34  | 4 KTN1       |
| 4.80E-65  | 0.296609137 | 0.375 | 0.19  | 1.54E-60  | 4 EPCAM      |
| 3.63E-54  | 0.296057037 | 0.347 | 0.183 | 1.17E-49  | 4 PI4KAP1    |
| 3.40E-44  | 0.295699968 | 0.57  | 0.382 | 1.09E-39  | 4 TAF3       |
| 4.92E-45  | 0.295076851 | 0.621 | 0.438 | 1.58E-40  | 4 AC090114.3 |
| 1.99E-48  | 0.294682126 | 0.571 | 0.38  | 6.40E-44  | 4 RLF        |
| 1.11E-42  | 0.294477001 | 0.411 | 0.248 | 3.57E-38  | 4 NOVA1      |
| 1.18E-40  | 0.293788041 | 0.767 | 0.604 | 3.78E-36  | 4 FER        |
| 2.04E-66  | 0.293436555 | 0.264 | 0.113 | 6.54E-62  | 4 AC009126.1 |
| 6.14E-68  | 0.29280924  | 0.725 | 0.507 | 1.97E-63  | 4 RANBP2     |
| 3.78E-111 | 0.292690808 | 0.25  | 0.079 | 1.21E-106 | 4 PLLP       |
| 6.21E-69  | 0.292541582 | 0.271 | 0.116 | 1.99E-64  | 4 BTG3       |
| 1.87E-56  | 0.292234044 | 0.496 | 0.298 | 6.00E-52  | 4 TMEM87A    |
| 3.85E-83  | 0.291824958 | 0.263 | 0.101 | 1.24E-78  | 4 SLC2A12    |
| 4.37E-71  | 0.291715457 | 0.346 | 0.164 | 1.40E-66  | 4 SCRNI      |
| 1.07E-45  | 0.291526622 | 0.26  | 0.132 | 3.43E-41  | 4 PRR26      |
| 3.23E-53  | 0.291127103 | 0.687 | 0.46  | 1.04E-48  | 4 SPIRE1     |
| 1.75E-39  | 0.291113211 | 0.506 | 0.339 | 5.63E-35  | 4 SLC44A1    |
| 7.55E-53  | 0.291046292 | 0.299 | 0.15  | 2.43E-48  | 4 GARNL3     |
| 2.83E-36  | 0.290879892 | 0.732 | 0.552 | 9.07E-32  | 4 TCF25      |
| 5.95E-38  | 0.290010018 | 0.889 | 0.777 | 1.91E-33  | 4 FGD4       |
| 1.67E-59  | 0.290000375 | 0.414 | 0.228 | 5.36E-55  | 4 ENO4       |
| 3.63E-37  | 0.289783407 | 0.609 | 0.451 | 1.16E-32  | 4 CCDC50     |
| 3.63E-57  | 0.289338278 | 0.334 | 0.171 | 1.17E-52  | 4 TMEM181    |
| 4.47E-40  | 0.2893218   | 0.469 | 0.299 | 1.43E-35  | 4 ASXL3      |
| 5.02E-47  | 0.288722859 | 0.472 | 0.295 | 1.61E-42  | 4 LENG8      |
| 1.46E-36  | 0.28857419  | 0.585 | 0.426 | 4.70E-32  | 4 CCNT2      |
| 8.54E-43  | 0.288528503 | 0.513 | 0.336 | 2.74E-38  | 4 PSEN1      |

|          |             |       |       |          |              |
|----------|-------------|-------|-------|----------|--------------|
| 1.40E-49 | 0.28829612  | 0.446 | 0.267 | 4.50E-45 | 4 ZNF431     |
| 1.13E-37 | 0.288236462 | 0.562 | 0.397 | 3.62E-33 | 4 CDYL       |
| 1.09E-42 | 0.288129007 | 0.702 | 0.52  | 3.51E-38 | 4 TRA2A      |
| 1.79E-62 | 0.287454148 | 0.271 | 0.119 | 5.74E-58 | 4 BARX2      |
| 4.07E-47 | 0.286454533 | 0.545 | 0.35  | 1.31E-42 | 4 MGA        |
| 1.06E-46 | 0.286136658 | 0.479 | 0.296 | 3.40E-42 | 4 C1GALT1    |
| 4.32E-50 | 0.284503855 | 0.416 | 0.241 | 1.39E-45 | 4 TMEM120B   |
| 2.57E-48 | 0.284337151 | 0.318 | 0.17  | 8.24E-44 | 4 MPZL1      |
| 7.73E-48 | 0.283984049 | 0.518 | 0.328 | 2.48E-43 | 4 PRR14L     |
| 3.50E-51 | 0.283869344 | 0.471 | 0.286 | 1.12E-46 | 4 KDM5B      |
| 8.72E-60 | 0.28382744  | 0.331 | 0.162 | 2.80E-55 | 4 ECE1       |
| 2.12E-34 | 0.282742029 | 0.737 | 0.582 | 6.81E-30 | 4 SCAF8      |
| 1.60E-56 | 0.282607632 | 0.693 | 0.477 | 5.15E-52 | 4 ZFHX3      |
| 1.26E-64 | 0.28253252  | 0.398 | 0.207 | 4.04E-60 | 4 ZDHC13     |
| 2.81E-37 | 0.282037384 | 0.567 | 0.395 | 9.01E-33 | 4 FBXW4      |
| 1.66E-39 | 0.281536984 | 0.449 | 0.285 | 5.34E-35 | 4 ZNF420     |
| 6.52E-46 | 0.281177358 | 0.5   | 0.316 | 2.09E-41 | 4 PRDM2      |
| 8.27E-48 | 0.280872912 | 0.577 | 0.369 | 2.66E-43 | 4 AC004160.1 |
| 2.87E-60 | 0.280628493 | 0.338 | 0.169 | 9.23E-56 | 4 DSP        |
| 1.28E-37 | 0.278902707 | 0.475 | 0.314 | 4.10E-33 | 4 R3HCC1L    |
| 1.60E-51 | 0.277498064 | 0.77  | 0.517 | 5.14E-47 | 4 OSBPL3     |
| 4.53E-50 | 0.277311947 | 0.964 | 0.911 | 1.45E-45 | 4 GPHN       |
| 6.70E-35 | 0.277243819 | 0.723 | 0.571 | 2.15E-30 | 4 USP9X      |
| 3.32E-51 | 0.277182702 | 0.546 | 0.334 | 1.06E-46 | 4 SLC16A10   |
| 1.18E-57 | 0.277165279 | 0.618 | 0.389 | 3.79E-53 | 4 MAP3K5     |
| 3.35E-44 | 0.277127733 | 0.294 | 0.154 | 1.07E-39 | 4 LINC00598  |
| 1.14E-35 | 0.276819479 | 0.432 | 0.279 | 3.66E-31 | 4 PWWP2A     |
| 2.60E-43 | 0.276503201 | 0.437 | 0.267 | 8.34E-39 | 4 MRPL1      |
| 4.39E-60 | 0.276417941 | 0.268 | 0.122 | 1.41E-55 | 4 SOAT1      |
| 4.66E-45 | 0.276171143 | 0.541 | 0.359 | 1.50E-40 | 4 CACUL1     |
| 2.16E-46 | 0.275833328 | 0.398 | 0.231 | 6.94E-42 | 4 SCAI       |
| 3.22E-41 | 0.275820798 | 0.482 | 0.309 | 1.04E-36 | 4 UBA6       |
| 1.09E-34 | 0.275698839 | 0.715 | 0.55  | 3.49E-30 | 4 RALGAPA2   |
| 5.01E-45 | 0.275053092 | 0.521 | 0.338 | 1.61E-40 | 4 XRN2       |
| 7.19E-50 | 0.274954769 | 0.316 | 0.165 | 2.31E-45 | 4 ZBTB4      |
| 4.87E-39 | 0.274723003 | 0.406 | 0.249 | 1.57E-34 | 4 CCDC144B   |
| 1.08E-71 | 0.274620722 | 0.272 | 0.112 | 3.46E-67 | 4 SLC9A2     |
| 4.97E-71 | 0.27422816  | 0.587 | 0.341 | 1.60E-66 | 4 SRGAP1     |
| 1.82E-55 | 0.273861112 | 0.447 | 0.259 | 5.84E-51 | 4 GTF2F2     |
| 2.46E-47 | 0.273640205 | 0.412 | 0.244 | 7.90E-43 | 4 USP7       |
| 1.27E-42 | 0.273365454 | 0.324 | 0.181 | 4.07E-38 | 4 PGM1       |
| 2.50E-39 | 0.273247426 | 0.471 | 0.305 | 8.02E-35 | 4 BCL9       |
| 1.13E-46 | 0.272698494 | 0.431 | 0.257 | 3.63E-42 | 4 MAP3K3     |
| 1.17E-19 | 0.2726931   | 0.726 | 0.614 | 3.76E-15 | 4 TBL1XR1    |
| 6.08E-51 | 0.271535872 | 0.406 | 0.231 | 1.95E-46 | 4 ACAT1      |
| 1.32E-43 | 0.269598342 | 0.753 | 0.574 | 4.24E-39 | 4 HECTD1     |
| 1.64E-53 | 0.268701671 | 0.474 | 0.281 | 5.25E-49 | 4 GTF2H2B    |
| 7.50E-45 | 0.267861468 | 0.55  | 0.363 | 2.41E-40 | 4 FAR1       |
| 7.58E-40 | 0.267776807 | 0.521 | 0.348 | 2.43E-35 | 4 ZNF10      |
| 4.78E-38 | 0.267733838 | 0.569 | 0.393 | 1.54E-33 | 4 SMG7       |
| 3.56E-16 | 0.267550137 | 0.356 | 0.264 | 1.14E-11 | 4 MTCO1P12   |

|           |             |       |       |           |              |
|-----------|-------------|-------|-------|-----------|--------------|
| 1.30E-38  | 0.267364435 | 0.8   | 0.623 | 4.19E-34  | 4 SCMH1      |
| 3.37E-50  | 0.267065148 | 0.407 | 0.235 | 1.08E-45  | 4 RGPD4      |
| 8.96E-20  | 0.266885858 | 0.473 | 0.358 | 2.88E-15  | 4 MT-ND4L    |
| 5.30E-31  | 0.266260827 | 0.774 | 0.644 | 1.70E-26  | 4 AP3B1      |
| 6.89E-55  | 0.2659498   | 0.281 | 0.134 | 2.21E-50  | 4 MYH14      |
| 4.57E-42  | 0.265806114 | 0.403 | 0.241 | 1.47E-37  | 4 UHRF1BP1L  |
| 1.11E-102 | 0.265460365 | 0.328 | 0.125 | 3.58E-98  | 4 NCALD      |
| 5.11E-51  | 0.265000383 | 0.724 | 0.537 | 1.64E-46  | 4 PDLIM5     |
| 5.08E-46  | 0.264396173 | 0.446 | 0.272 | 1.63E-41  | 4 SETDB2     |
| 1.87E-43  | 0.264303453 | 0.636 | 0.43  | 6.01E-39  | 4 SEPTIN9    |
| 2.53E-37  | 0.264105722 | 0.881 | 0.791 | 8.13E-33  | 4 FAF1       |
| 5.60E-91  | 0.263711491 | 0.536 | 0.261 | 1.80E-86  | 4 CTTNBP2    |
| 1.92E-68  | 0.263658208 | 0.292 | 0.129 | 6.16E-64  | 4 INTS7      |
| 1.06E-35  | 0.263638234 | 0.467 | 0.313 | 3.40E-31  | 4 SACM1L     |
| 5.79E-70  | 0.263516713 | 0.32  | 0.147 | 1.86E-65  | 4 HIPK1      |
| 8.15E-40  | 0.263464598 | 0.285 | 0.156 | 2.62E-35  | 4 ANKDD1B    |
| 5.61E-61  | 0.262743275 | 0.26  | 0.114 | 1.80E-56  | 4 DMKN       |
| 2.32E-63  | 0.262553903 | 0.315 | 0.15  | 7.45E-59  | 4 GPD1L      |
| 4.55E-41  | 0.261833354 | 0.432 | 0.27  | 1.46E-36  | 4 KCTD20     |
| 1.95E-31  | 0.2613591   | 0.629 | 0.471 | 6.26E-27  | 4 PAPOLA     |
| 3.75E-35  | 0.260719315 | 0.691 | 0.522 | 1.20E-30  | 4 RIC1       |
| 1.13E-73  | 0.260390943 | 0.472 | 0.239 | 3.62E-69  | 4 HGD        |
| 1.14E-24  | 0.259138108 | 0.817 | 0.691 | 3.66E-20  | 4 SUMF1      |
| 7.88E-38  | 0.25896501  | 0.744 | 0.586 | 2.53E-33  | 4 EML4       |
| 2.06E-39  | 0.258586763 | 0.546 | 0.373 | 6.61E-35  | 4 MED27      |
| 6.54E-41  | 0.257813382 | 0.478 | 0.309 | 2.10E-36  | 4 USP22      |
| 2.74E-73  | 0.257297805 | 0.299 | 0.128 | 8.81E-69  | 4 USP28      |
| 7.96E-33  | 0.257068982 | 0.55  | 0.386 | 2.56E-28  | 4 INTS6      |
| 2.37E-42  | 0.256201815 | 0.449 | 0.275 | 7.62E-38  | 4 TRMT9B     |
| 4.62E-36  | 0.255574069 | 0.553 | 0.378 | 1.48E-31  | 4 HNF1B      |
| 5.02E-34  | 0.255266049 | 0.642 | 0.471 | 1.61E-29  | 4 STRBP      |
| 1.29E-39  | 0.255229087 | 0.482 | 0.316 | 4.13E-35  | 4 EIF3H      |
| 5.41E-56  | 0.255027559 | 0.331 | 0.168 | 1.74E-51  | 4 B2M        |
| 5.37E-31  | 0.254968426 | 0.824 | 0.697 | 1.73E-26  | 4 ITFG1      |
| 5.46E-31  | 0.254960684 | 0.674 | 0.517 | 1.75E-26  | 4 STX8       |
| 1.83E-39  | 0.254266132 | 0.943 | 0.871 | 5.86E-35  | 4 LPP        |
| 2.67E-38  | 0.254200899 | 0.623 | 0.449 | 8.57E-34  | 4 SREK1      |
| 4.05E-44  | 0.254072114 | 0.447 | 0.263 | 1.30E-39  | 4 ZNF208     |
| 1.22E-33  | 0.253961803 | 0.619 | 0.463 | 3.92E-29  | 4 SNX13      |
| 1.22E-25  | 0.253876791 | 0.751 | 0.61  | 3.92E-21  | 4 CPQ        |
| 3.81E-105 | 0.252994472 | 0.291 | 0.102 | 1.22E-100 | 4 CSPG4P12   |
| 1.26E-36  | 0.252968012 | 0.402 | 0.25  | 4.05E-32  | 4 PRRG1      |
| 6.80E-57  | 0.25270819  | 0.326 | 0.162 | 2.19E-52  | 4 HDAC5      |
| 9.30E-50  | 0.252311082 | 0.343 | 0.184 | 2.99E-45  | 4 MKKS       |
| 2.20E-41  | 0.251856732 | 0.485 | 0.308 | 7.06E-37  | 4 INPP5A     |
| 3.04E-43  | 0.251533784 | 0.404 | 0.235 | 9.75E-39  | 4 ABR        |
| 1.15E-26  | 0.250845696 | 0.947 | 0.878 | 3.69E-22  | 4 WWOX       |
| 1.02E-34  | 0.250777831 | 0.444 | 0.286 | 3.29E-30  | 4 AC139887.2 |
| 5.20E-36  | 0.250740065 | 0.452 | 0.294 | 1.67E-31  | 4 BRWD3      |
| 1.10E-49  | 0.250708289 | 0.262 | 0.126 | 3.54E-45  | 4 CARS1      |
| 3.69E-59  | 0.250213727 | 0.494 | 0.272 | 1.18E-54  | 4 SCN3A      |



|           |             |       |       |           |               |
|-----------|-------------|-------|-------|-----------|---------------|
| 0         | 2.910478764 | 0.842 | 0.206 | 0         | 5 AC096577.1  |
| 0         | 2.837834672 | 0.903 | 0.257 | 0         | 5 FTCD        |
| 0         | 2.707209723 | 0.788 | 0.244 | 0         | 5 SORCS1      |
| 0         | 2.594541704 | 0.976 | 0.352 | 0         | 5 ACSM2A      |
| 0         | 2.533326492 | 0.665 | 0.215 | 0         | 5 RNF212B     |
| 0         | 2.532484309 | 0.655 | 0.295 | 0         | 5 CYP3A5      |
| 0         | 2.507852505 | 0.968 | 0.32  | 0         | 5 ACSM2B      |
| 0         | 2.383524614 | 0.796 | 0.255 | 0         | 5 GPX3        |
| 0         | 2.299688573 | 0.811 | 0.21  | 0         | 5 PRODH2      |
| 9.28E-98  | 2.244595969 | 0.697 | 0.637 | 2.98E-93  | 5 SLC05A1     |
| 6.76E-241 | 2.213453883 | 0.445 | 0.166 | 2.17E-236 | 5 FTL         |
| 0         | 2.173866692 | 0.92  | 0.583 | 0         | 5 RAB11FIP3   |
| 0         | 2.10793679  | 0.746 | 0.193 | 0         | 5 SLC22A6     |
| 0         | 2.054830198 | 0.89  | 0.426 | 0         | 5 PDZD2       |
| 0         | 2.049912836 | 0.597 | 0.139 | 0         | 5 SLC34A1     |
| 0         | 2.021722723 | 0.818 | 0.238 | 0         | 5 SLC13A3     |
| 0         | 2.007301886 | 0.961 | 0.421 | 0         | 5 CUBN        |
| 0         | 1.968424861 | 0.778 | 0.3   | 0         | 5 SLC2A9      |
| 2.93E-307 | 1.927825969 | 0.473 | 0.144 | 9.42E-303 | 5 CXXC4-AS1   |
| 0         | 1.908262374 | 0.735 | 0.24  | 0         | 5 SLC6A13     |
| 0         | 1.886886108 | 0.993 | 0.986 | 0         | 5 FP671120.4  |
| 0         | 1.879778421 | 0.884 | 0.499 | 0         | 5 PTH1R       |
| 5.55E-292 | 1.87950228  | 0.999 | 0.998 | 1.78E-287 | 5 HFM1        |
| 0         | 1.866233178 | 0.652 | 0.217 | 0         | 5 LINC01060   |
| 0         | 1.859578444 | 0.789 | 0.285 | 0         | 5 MME         |
| 0         | 1.852505317 | 0.538 | 0.164 | 0         | 5 AC004053.1  |
| 0         | 1.832061558 | 0.67  | 0.256 | 0         | 5 ACSF2       |
| 0         | 1.829964275 | 0.602 | 0.243 | 0         | 5 EBNA1BP2    |
| 0         | 1.813692567 | 0.62  | 0.197 | 0         | 5 SLC13A1     |
| 0         | 1.809703041 | 0.654 | 0.196 | 0         | 5 AGXT2       |
| 0         | 1.78750555  | 0.695 | 0.301 | 0         | 5 GRAMD1B     |
| 0         | 1.779469429 | 0.684 | 0.216 | 0         | 5 MIOX        |
| 0         | 1.749460852 | 0.5   | 0.151 | 0         | 5 CLEC18A     |
| 0         | 1.732520684 | 0.52  | 0.142 | 0         | 5 CYP4A11     |
| 0         | 1.730794567 | 0.664 | 0.276 | 0         | 5 PCDH15      |
| 0         | 1.730025491 | 0.612 | 0.174 | 0         | 5 AFM         |
| 2.39E-299 | 1.72958553  | 0.597 | 0.239 | 7.69E-295 | 5 Z93403.1    |
| 0         | 1.72762787  | 0.507 | 0.15  | 0         | 5 DPEP1       |
| 0         | 1.723173621 | 1     | 0.999 | 0         | 5 FP671120.7  |
| 0         | 1.714308909 | 0.77  | 0.263 | 0         | 5 SLC17A1     |
| 0         | 1.712231311 | 0.802 | 0.313 | 0         | 5 UGT1A8      |
| 0         | 1.684402866 | 0.571 | 0.207 | 0         | 5 ASS1        |
| 0         | 1.683785353 | 0.813 | 0.261 | 0         | 5 SLC5A12     |
| 4.68E-69  | 1.676673685 | 0.515 | 0.431 | 1.50E-64  | 5 FP236383.5  |
| 1.92E-285 | 1.655697818 | 0.449 | 0.138 | 6.16E-281 | 5 CYP4A22-AS1 |
| 7.22E-162 | 1.624944194 | 0.464 | 0.233 | 2.32E-157 | 5 CTSH        |
| 5.94E-224 | 1.614982011 | 0.542 | 0.252 | 1.91E-219 | 5 ENPP7P8     |
| 0         | 1.612541772 | 0.542 | 0.177 | 0         | 5 HNF4A       |
| 2.43E-265 | 1.596624067 | 0.563 | 0.234 | 7.80E-261 | 5 LINC00671   |
| 4.65E-222 | 1.594461935 | 0.354 | 0.104 | 1.49E-217 | 5 COL6A2      |
| 4.83E-291 | 1.563642337 | 0.961 | 0.932 | 1.55E-286 | 5 MT-RNR1     |

|           |             |       |       |           |              |
|-----------|-------------|-------|-------|-----------|--------------|
| 3.38E-130 | 1.560391459 | 0.783 | 0.823 | 1.09E-125 | 5 FP236383.3 |
| 1.09E-258 | 1.55063521  | 0.632 | 0.318 | 3.50E-254 | 5 CCDC200    |
| 2.22E-228 | 1.547796236 | 0.547 | 0.243 | 7.14E-224 | 5 AC027288.3 |
| 0         | 1.5430193   | 0.57  | 0.189 | 0         | 5 ALDOB      |
| 1.27E-247 | 1.541702915 | 0.486 | 0.177 | 4.07E-243 | 5 SLC28A1    |
| 0         | 1.52972358  | 0.756 | 0.274 | 0         | 5 SLC16A9    |
| 0         | 1.529011406 | 0.836 | 0.4   | 0         | 5 SLC4A4     |
| 1.78E-255 | 1.520759047 | 0.389 | 0.112 | 5.72E-251 | 5 AMN        |
| 7.43E-302 | 1.50775312  | 0.609 | 0.229 | 2.39E-297 | 5 GLYAT      |
| 3.51E-300 | 1.503990127 | 0.818 | 0.462 | 1.13E-295 | 5 FKBP5      |
| 3.43E-261 | 1.470613767 | 0.712 | 0.39  | 1.10E-256 | 5 ERRFI1     |
| 4.24E-268 | 1.469971583 | 0.473 | 0.151 | 1.36E-263 | 5 SLC17A3    |
| 1.47E-227 | 1.462204284 | 0.555 | 0.249 | 4.73E-223 | 5 SLC47A1    |
| 2.69E-159 | 1.44472106  | 0.348 | 0.132 | 8.63E-155 | 5 SH3BP2     |
| 1.48E-228 | 1.43639401  | 0.377 | 0.115 | 4.74E-224 | 5 SLC22A11   |
| 1.22E-230 | 1.427353577 | 0.757 | 0.578 | 3.91E-226 | 5 AC068587.4 |
| 1.17E-186 | 1.427056305 | 0.413 | 0.157 | 3.77E-182 | 5 SLC27A2    |
| 0         | 1.424976149 | 0.648 | 0.227 | 0         | 5 PAH        |
| 2.65E-211 | 1.418607203 | 0.484 | 0.194 | 8.51E-207 | 5 AK4        |
| 2.75E-100 | 1.416836354 | 0.503 | 0.358 | 8.82E-96  | 5 ALDH1L1    |
| 2.10E-182 | 1.412959702 | 0.646 | 0.438 | 6.74E-178 | 5 TPCN1      |
| 7.59E-214 | 1.402959266 | 0.52  | 0.217 | 2.44E-209 | 5 AL391117.1 |
| 2.39E-204 | 1.397717839 | 0.43  | 0.159 | 7.67E-200 | 5 ANPEP      |
| 5.54E-283 | 1.39416346  | 0.992 | 0.986 | 1.78E-278 | 5 MT-RNR2    |
| 2.16E-110 | 1.392507684 | 0.403 | 0.222 | 6.95E-106 | 5 SLC66A2    |
| 2.74E-108 | 1.391436017 | 0.347 | 0.158 | 8.79E-104 | 5 CDH20      |
| 3.77E-64  | 1.387123519 | 0.539 | 0.475 | 1.21E-59  | 5 DHFR       |
| 6.73E-167 | 1.36823672  | 0.504 | 0.255 | 2.16E-162 | 5 RASSF4     |
| 6.59E-215 | 1.347331761 | 0.393 | 0.127 | 2.12E-210 | 5 UPB1       |
| 6.47E-233 | 1.347222861 | 0.471 | 0.163 | 2.08E-228 | 5 PLG        |
| 4.50E-154 | 1.337422586 | 0.421 | 0.187 | 1.45E-149 | 5 SMIM2-AS1  |
| 8.01E-138 | 1.335446629 | 0.578 | 0.402 | 2.57E-133 | 5 MCF2L      |
| 6.80E-179 | 1.320284086 | 0.37  | 0.13  | 2.19E-174 | 5 KCNK5      |
| 3.41E-169 | 1.308834681 | 0.35  | 0.121 | 1.09E-164 | 5 AC010451.1 |
| 1.43E-297 | 1.29974622  | 0.772 | 0.35  | 4.58E-293 | 5 LRP2       |
| 8.81E-135 | 1.293306868 | 0.328 | 0.128 | 2.83E-130 | 5 GGT1       |
| 4.76E-104 | 1.280404627 | 0.382 | 0.2   | 1.53E-99  | 5 IL6R       |
| 1.12E-179 | 1.279379245 | 0.558 | 0.268 | 3.59E-175 | 5 LINC00871  |
| 2.95E-125 | 1.275114087 | 0.403 | 0.199 | 9.48E-121 | 5 MLXIPL     |
| 1.62E-239 | 1.273325956 | 0.504 | 0.172 | 5.21E-235 | 5 SLC36A2    |
| 1.47E-115 | 1.264067293 | 0.278 | 0.105 | 4.71E-111 | 5 ACSM5      |
| 1.51E-110 | 1.256025442 | 0.282 | 0.108 | 4.84E-106 | 5 AC105094.2 |
| 1.52E-128 | 1.249627996 | 0.375 | 0.159 | 4.88E-124 | 5 PCK1       |
| 1.13E-143 | 1.238626198 | 0.33  | 0.124 | 3.62E-139 | 5 FUT6       |
| 1.02E-127 | 1.23397913  | 0.505 | 0.279 | 3.27E-123 | 5 MIR100HG   |
| 1.05E-82  | 1.231128805 | 0.42  | 0.274 | 3.37E-78  | 5 AFMID      |
| 4.99E-127 | 1.213595291 | 0.328 | 0.133 | 1.60E-122 | 5 CLEC18B    |
| 1.31E-103 | 1.20365336  | 0.491 | 0.317 | 4.21E-99  | 5 SLC12A6    |
| 5.01E-131 | 1.191375413 | 0.609 | 0.432 | 1.61E-126 | 5 MSRA       |
| 2.37E-136 | 1.190570741 | 0.355 | 0.144 | 7.62E-132 | 5 NPL        |
| 8.85E-170 | 1.186174973 | 0.514 | 0.236 | 2.84E-165 | 5 RHOBTB1    |

|           |             |       |       |           |               |
|-----------|-------------|-------|-------|-----------|---------------|
| 4.85E-192 | 1.183165612 | 0.777 | 0.607 | 1.56E-187 | 5 L3MBTL4     |
| 1.32E-71  | 1.18277163  | 0.469 | 0.359 | 4.24E-67  | 5 PLEKHA6     |
| 8.12E-91  | 1.177090407 | 0.514 | 0.371 | 2.61E-86  | 5 LIN52       |
| 3.89E-65  | 1.173709306 | 0.335 | 0.201 | 1.25E-60  | 5 BAIAP2      |
| 4.46E-100 | 1.170743964 | 0.278 | 0.115 | 1.43E-95  | 5 C4B         |
| 8.86E-124 | 1.164945709 | 0.314 | 0.121 | 2.85E-119 | 5 SLC17A4     |
| 2.94E-118 | 1.164066914 | 0.668 | 0.503 | 9.44E-114 | 5 SDK1        |
| 7.16E-203 | 1.163042388 | 0.658 | 0.346 | 2.30E-198 | 5 NOX4        |
| 7.10E-103 | 1.162521308 | 0.624 | 0.532 | 2.28E-98  | 5 GUSBP11     |
| 8.77E-98  | 1.161380629 | 0.318 | 0.147 | 2.82E-93  | 5 ABHD14A-ACY |
| 3.36E-99  | 1.159573191 | 0.703 | 0.63  | 1.08E-94  | 5 MTRNR2L12   |
| 1.45E-55  | 1.159248415 | 0.288 | 0.165 | 4.67E-51  | 5 TIPARP      |
| 2.88E-133 | 1.155878413 | 0.279 | 0.095 | 9.26E-129 | 5 CDHR5       |
| 1.46E-192 | 1.148202363 | 0.719 | 0.408 | 4.70E-188 | 5 SLC16A12    |
| 4.80E-106 | 1.14333066  | 0.333 | 0.151 | 1.54E-101 | 5 ABCC2       |
| 1.02E-86  | 1.139442306 | 0.335 | 0.172 | 3.29E-82  | 5 PARP10      |
| 4.13E-55  | 1.138601279 | 0.35  | 0.235 | 1.33E-50  | 5 DHTKD1      |
| 2.88E-92  | 1.133964323 | 0.58  | 0.476 | 9.25E-88  | 5 CRYL1       |
| 2.67E-169 | 1.132178893 | 0.726 | 0.518 | 8.56E-165 | 5 NCKAP5      |
| 9.94E-90  | 1.129522879 | 0.282 | 0.125 | 3.19E-85  | 5 PRSS51      |
| 1.51E-107 | 1.128840259 | 0.31  | 0.129 | 4.84E-103 | 5 CYP4Z1      |
| 1.60E-134 | 1.124246064 | 0.697 | 0.581 | 5.13E-130 | 5 FGGY        |
| 8.64E-144 | 1.122658333 | 0.449 | 0.2   | 2.77E-139 | 5 AL589669.1  |
| 1.09E-81  | 1.121565056 | 0.285 | 0.136 | 3.51E-77  | 5 PC          |
| 4.58E-31  | 1.11846307  | 0.539 | 0.552 | 1.47E-26  | 5 PDE3A       |
| 5.64E-145 | 1.117944744 | 0.647 | 0.429 | 1.81E-140 | 5 SUGCT       |
| 9.13E-120 | 1.108506782 | 0.326 | 0.131 | 2.93E-115 | 5 AC087762.1  |
| 3.43E-112 | 1.106406354 | 0.338 | 0.149 | 1.10E-107 | 5 MAPT        |
| 7.92E-76  | 1.104880216 | 0.393 | 0.243 | 2.54E-71  | 5 COL27A1     |
| 1.45E-80  | 1.102369973 | 0.269 | 0.122 | 4.65E-76  | 5 GADD45A     |
| 2.60E-92  | 1.099868517 | 0.598 | 0.507 | 8.37E-88  | 5 PPARA       |
| 3.06E-100 | 1.097225179 | 0.31  | 0.137 | 9.82E-96  | 5 PDZK1IP1    |
| 8.20E-49  | 1.095882719 | 0.449 | 0.372 | 2.63E-44  | 5 CCDC146     |
| 2.90E-98  | 1.091861204 | 0.321 | 0.145 | 9.32E-94  | 5 AC087482.1  |
| 6.21E-91  | 1.088862925 | 0.437 | 0.261 | 2.00E-86  | 5 CCNT2-AS1   |
| 3.45E-134 | 1.087803203 | 0.505 | 0.274 | 1.11E-129 | 5 BBOX1       |
| 8.48E-61  | 1.084722044 | 0.459 | 0.348 | 2.72E-56  | 5 SLC1A1      |
| 3.30E-96  | 1.083659275 | 0.296 | 0.126 | 1.06E-91  | 5 ADGRG5      |
| 6.00E-30  | 1.074956909 | 0.368 | 0.308 | 1.93E-25  | 5 P4HA1       |
| 4.60E-48  | 1.069844477 | 0.375 | 0.264 | 1.48E-43  | 5 SLC7A8      |
| 9.27E-42  | 1.065751533 | 0.308 | 0.206 | 2.98E-37  | 5 ZNF826P     |
| 1.64E-116 | 1.06363466  | 0.292 | 0.111 | 5.27E-112 | 5 CYP4F3      |
| 5.40E-49  | 1.060712036 | 0.301 | 0.19  | 1.74E-44  | 5 GPR155      |
| 5.70E-49  | 1.050441578 | 0.395 | 0.295 | 1.83E-44  | 5 BNIP3L      |
| 4.27E-86  | 1.046480947 | 0.342 | 0.172 | 1.37E-81  | 5 SLC47A2     |
| 6.46E-90  | 1.04432748  | 0.253 | 0.103 | 2.07E-85  | 5 ESPN        |
| 1.95E-74  | 1.044217812 | 0.618 | 0.616 | 6.27E-70  | 5 SRRM2       |
| 4.38E-46  | 1.043888767 | 0.377 | 0.282 | 1.41E-41  | 5 D2HGDH      |
| 1.56E-68  | 1.041152594 | 0.357 | 0.208 | 5.00E-64  | 5 XYL B       |
| 4.87E-61  | 1.037950786 | 0.501 | 0.422 | 1.56E-56  | 5 HPN         |
| 9.20E-60  | 1.037415156 | 0.375 | 0.242 | 2.95E-55  | 5 FAM20C      |

|           |             |       |       |           |              |
|-----------|-------------|-------|-------|-----------|--------------|
| 1.97E-54  | 1.036442408 | 0.388 | 0.262 | 6.34E-50  | 5 AC008554.1 |
| 3.10E-49  | 1.036397813 | 0.288 | 0.175 | 9.95E-45  | 5 FAAH       |
| 5.83E-52  | 1.034584693 | 0.341 | 0.224 | 1.87E-47  | 5 ALDH3A2    |
| 9.35E-65  | 1.029884846 | 0.275 | 0.14  | 3.00E-60  | 5 MAF        |
| 6.18E-34  | 1.029612075 | 0.41  | 0.36  | 1.98E-29  | 5 PLCG1      |
| 7.02E-115 | 1.029425127 | 0.34  | 0.14  | 2.26E-110 | 5 CDH9       |
| 2.86E-119 | 1.02738051  | 0.563 | 0.345 | 9.18E-115 | 5 CNTNAP3B   |
| 2.52E-36  | 1.027031876 | 0.334 | 0.251 | 8.09E-32  | 5 SLC22A5    |
| 3.02E-37  | 1.024311053 | 0.446 | 0.404 | 9.71E-33  | 5 SH3YL1     |
| 8.40E-73  | 1.02385585  | 0.468 | 0.317 | 2.70E-68  | 5 LINC00278  |
| 9.63E-81  | 1.023000136 | 0.355 | 0.181 | 3.09E-76  | 5 ZNF804B    |
| 9.32E-56  | 1.021531345 | 0.608 | 0.611 | 2.99E-51  | 5 ULK4       |
| 3.15E-97  | 1.016423286 | 0.462 | 0.271 | 1.01E-92  | 5 PCSK5      |
| 7.88E-68  | 1.012813717 | 0.317 | 0.174 | 2.53E-63  | 5 TNFRSF14   |
| 1.99E-98  | 1.012716242 | 0.26  | 0.101 | 6.41E-94  | 5 SLC6A19    |
| 2.63E-72  | 1.012539876 | 0.269 | 0.128 | 8.43E-68  | 5 DRAIC      |
| 2.39E-125 | 1.007780072 | 0.489 | 0.248 | 7.67E-121 | 5 TINAG      |
| 8.62E-94  | 1.00132984  | 0.341 | 0.162 | 2.77E-89  | 5 HECW1      |
| 2.02E-55  | 0.997505449 | 0.317 | 0.194 | 6.49E-51  | 5 TTC38      |
| 9.89E-56  | 0.995858535 | 0.326 | 0.202 | 3.18E-51  | 5 SHMT1      |
| 5.74E-34  | 0.99239043  | 0.336 | 0.257 | 1.84E-29  | 5 AC005726.1 |
| 8.10E-63  | 0.98588828  | 0.341 | 0.202 | 2.60E-58  | 5 LINC01239  |
| 5.44E-59  | 0.982894498 | 0.252 | 0.128 | 1.75E-54  | 5 GGT3P      |
| 1.49E-49  | 0.982597286 | 0.397 | 0.287 | 4.78E-45  | 5 AC113414.1 |
| 9.16E-28  | 0.980387648 | 0.254 | 0.177 | 2.94E-23  | 5 F11-AS1    |
| 1.79E-129 | 0.977946627 | 0.412 | 0.18  | 5.74E-125 | 5 DPYS       |
| 1.63E-103 | 0.977159782 | 0.5   | 0.285 | 5.24E-99  | 5 ENPEP      |
| 2.50E-56  | 0.972058353 | 0.475 | 0.374 | 8.05E-52  | 5 FRMD4B     |
| 7.35E-65  | 0.970545183 | 0.279 | 0.144 | 2.36E-60  | 5 AP000346.1 |
| 7.53E-31  | 0.970357231 | 0.279 | 0.201 | 2.42E-26  | 5 HAGH       |
| 1.14E-89  | 0.965951705 | 0.327 | 0.153 | 3.65E-85  | 5 PPP1R16B   |
| 1.47E-93  | 0.964010563 | 0.453 | 0.256 | 4.74E-89  | 5 PRUNE2     |
| 2.54E-114 | 0.963656912 | 0.598 | 0.373 | 8.16E-110 | 5 KCNJ15     |
| 5.86E-47  | 0.962707601 | 0.284 | 0.173 | 1.88E-42  | 5 SLC25A42   |
| 5.52E-64  | 0.959481132 | 0.283 | 0.146 | 1.77E-59  | 5 ATP8B4     |
| 9.63E-26  | 0.95772835  | 0.382 | 0.341 | 3.09E-21  | 5 PDPR       |
| 1.32E-53  | 0.956518464 | 0.381 | 0.259 | 4.24E-49  | 5 EHHADH     |
| 9.75E-70  | 0.951156782 | 0.435 | 0.283 | 3.13E-65  | 5 CNTNAP3P2  |
| 2.11E-39  | 0.949823338 | 0.352 | 0.257 | 6.79E-35  | 5 DDX58      |
| 2.38E-70  | 0.947804996 | 0.292 | 0.145 | 7.66E-66  | 5 SLC7A7     |
| 1.99E-41  | 0.946226122 | 0.499 | 0.469 | 6.38E-37  | 5 FBXO21     |
| 4.04E-78  | 0.94090527  | 0.329 | 0.166 | 1.30E-73  | 5 GLIS1      |
| 5.17E-21  | 0.939030618 | 0.386 | 0.362 | 1.66E-16  | 5 RTTN       |
| 1.31E-57  | 0.937986531 | 0.26  | 0.136 | 4.21E-53  | 5 P4HA2      |
| 3.49E-33  | 0.9344228   | 0.283 | 0.197 | 1.12E-28  | 5 CALM1      |
| 3.19E-34  | 0.934136213 | 0.272 | 0.183 | 1.02E-29  | 5 ABAT       |
| 1.59E-81  | 0.931769315 | 0.292 | 0.132 | 5.11E-77  | 5 SLC22A8    |
| 1.38E-66  | 0.93044446  | 0.61  | 0.583 | 4.44E-62  | 5 TNS1       |
| 2.78E-28  | 0.921260171 | 0.337 | 0.271 | 8.92E-24  | 5 CDK10      |
| 1.24E-72  | 0.918255304 | 0.29  | 0.137 | 3.99E-68  | 5 LINC02147  |
| 1.81E-12  | 0.917356013 | 0.328 | 0.324 | 5.80E-08  | 5 KDM4B      |

|            |             |       |       |             |              |
|------------|-------------|-------|-------|-------------|--------------|
| 1.64E-19   | 0.91544063  | 0.326 | 0.283 | 5.28E-15    | 5 SNX30      |
| 4.38E-32   | 0.912668205 | 0.362 | 0.289 | 1.41E-27    | 5 KIAA1549   |
| 1.51E-20   | 0.909938259 | 0.328 | 0.285 | 4.85E-16    | 5 DIXDC1     |
| 3.76E-38   | 0.908687954 | 0.541 | 0.575 | 1.21E-33    | 5 TAF1D      |
| 2.45E-134  | 0.908597116 | 0.665 | 0.415 | 7.86E-130   | 5 NLGN1      |
| 2.09E-15   | 0.898246192 | 0.317 | 0.283 | 6.70E-11    | 5 ANKDD1A    |
| 4.42E-13   | 0.891719645 | 0.38  | 0.383 | 1.42E-08    | 5 MFSD14B    |
| 4.93E-40   | 0.890973131 | 0.262 | 0.16  | 1.58E-35    | 5 RASA4B     |
| 1.04E-47   | 0.885961978 | 0.379 | 0.265 | 3.35E-43    | 5 CDHR3      |
| 2.02E-12   | 0.884844973 | 0.357 | 0.368 | 6.48E-08    | 5 ENPP7P6    |
| 7.52E-23   | 0.882568063 | 0.288 | 0.228 | 2.41E-18    | 5 SAT2       |
| 2.24E-07   | 0.882545356 | 0.268 | 0.264 | 0.007207629 | 5 ENPP3      |
| 1.47E-162  | 0.880523649 | 0.862 | 0.699 | 4.73E-158   | 5 DLG2       |
| 1.71E-13   | 0.873998792 | 0.266 | 0.232 | 5.48E-09    | 5 SNHG25     |
| 1.57E-69   | 0.861420606 | 0.344 | 0.184 | 5.06E-65    | 5 AL110292.1 |
| 2.02E-69   | 0.856911884 | 0.366 | 0.204 | 6.48E-65    | 5 RMST       |
| 3.85E-109  | 0.855793139 | 0.602 | 0.367 | 1.24E-104   | 5 BNC2       |
| 1.18E-67   | 0.853032396 | 0.656 | 0.661 | 3.78E-63    | 5 INSR       |
| 3.93E-35   | 0.849017221 | 0.357 | 0.271 | 1.26E-30    | 5 BHMT2      |
| 1.73E-33   | 0.846315449 | 0.361 | 0.275 | 5.55E-29    | 5 CTTNBP2    |
| 1.17E-25   | 0.835448531 | 0.265 | 0.192 | 3.75E-21    | 5 HDAC6      |
| 1.75E-97   | 0.83365389  | 0.706 | 0.543 | 5.63E-93    | 5 ZBTB16     |
| 3.43E-22   | 0.828658068 | 0.309 | 0.252 | 1.10E-17    | 5 HGD        |
| 4.47E-40   | 0.826257123 | 0.376 | 0.274 | 1.43E-35    | 5 PDZK1      |
| 1.15E-19   | 0.824543102 | 0.296 | 0.243 | 3.71E-15    | 5 ABR        |
| 9.55E-14   | 0.822718867 | 0.514 | 0.618 | 3.07E-09    | 5 GOLGB1     |
| 4.52E-21   | 0.818358938 | 0.317 | 0.263 | 1.45E-16    | 5 LSP1P5     |
| 6.60E-29   | 0.815219199 | 0.314 | 0.234 | 2.12E-24    | 5 CNTNAP3    |
| 1.38E-28   | 0.810239266 | 0.284 | 0.204 | 4.42E-24    | 5 PEPD       |
| 1.19E-17   | 0.808033939 | 0.391 | 0.377 | 3.84E-13    | 5 WASH7P     |
| 1.99E-204  | 0.804366072 | 0.977 | 0.821 | 6.40E-200   | 5 PTH2R      |
| 3.20E-28   | 0.804092107 | 0.59  | 0.628 | 1.03E-23    | 5 KCNQ1OT1   |
| 5.59E-20   | 0.799516397 | 0.291 | 0.234 | 1.79E-15    | 5 PAPLN      |
| 4.19E-32   | 0.799215454 | 0.506 | 0.507 | 1.34E-27    | 5 MIA2       |
| 1.75E-17   | 0.792485019 | 0.336 | 0.299 | 5.62E-13    | 5 TM7SF3     |
| 8.76E-18   | 0.783582807 | 0.319 | 0.276 | 2.81E-13    | 5 NQO2       |
| 3.52E-50   | 0.77658836  | 0.295 | 0.165 | 1.13E-45    | 5 GDA        |
| 3.88E-07   | 0.773869157 | 0.312 | 0.326 | 0.012473261 | 5 KLHL20     |
| 2.04E-35   | 0.770842066 | 0.265 | 0.163 | 6.54E-31    | 5 AGMO       |
| 5.85E-11   | 0.766912527 | 0.297 | 0.279 | 1.88E-06    | 5 GANC       |
| 1.73E-15   | 0.756517781 | 0.405 | 0.411 | 5.57E-11    | 5 MTFR1      |
| 1.37E-11   | 0.7555406   | 0.389 | 0.414 | 4.40E-07    | 5 DMXL2      |
| 4.15E-22   | 0.751906047 | 0.504 | 0.526 | 1.33E-17    | 5 HNF1A-AS1  |
| 3.31E-08   | 0.750180084 | 0.323 | 0.327 | 0.00106419  | 5 MTARC2     |
| 2.22E-10   | 0.74845838  | 0.338 | 0.341 | 7.12E-06    | 5 OSBPL1A    |
| 2.01E-57   | 0.745921838 | 0.702 | 0.78  | 6.45E-53    | 5 GOLGA4     |
| 0.00016214 | 0.745358345 | 0.392 | 0.485 | 1           | 5 ADD1       |
| 5.67E-07   | 0.737764939 | 0.282 | 0.281 | 0.01819875  | 5 CLUH       |
| 1.56E-09   | 0.735668028 | 0.314 | 0.301 | 5.01E-05    | 5 RAPGEF3    |
| 3.76E-22   | 0.734014221 | 0.251 | 0.181 | 1.21E-17    | 5 ABCC6      |
| 8.57E-22   | 0.732121138 | 0.507 | 0.547 | 2.75E-17    | 5 PAX2       |

|            |             |       |       |             |                 |
|------------|-------------|-------|-------|-------------|-----------------|
| 4.95E-07   | 0.728637741 | 0.331 | 0.353 | 0.015900957 | 5 ABHD15-AS1    |
| 3.35E-11   | 0.727914281 | 0.46  | 0.538 | 1.07E-06    | 5 SNRNP70       |
| 6.22E-17   | 0.72664789  | 0.252 | 0.197 | 2.00E-12    | 5 LINC01788     |
| 7.53E-06   | 0.725685083 | 0.26  | 0.261 | 0.241800645 | 5 C11orf54      |
| 1.68E-16   | 0.72484638  | 0.301 | 0.241 | 5.39E-12    | 5 PPP2R2B       |
| 5.84E-23   | 0.721207412 | 0.342 | 0.276 | 1.88E-18    | 5 TENM1         |
| 4.97E-07   | 0.718367528 | 0.328 | 0.347 | 0.015976506 | 5 EPHX2         |
| 1.09E-30   | 0.717979778 | 0.386 | 0.288 | 3.50E-26    | 5 UGT2B7        |
| 1.64E-82   | 0.715884706 | 0.563 | 0.366 | 5.28E-78    | 5 PTPRD         |
| 5.10E-12   | 0.712894028 | 0.414 | 0.449 | 1.64E-07    | 5 AC105233.4    |
| 3.38E-30   | 0.711771392 | 0.258 | 0.167 | 1.08E-25    | 5 SLC25A48      |
| 2.12E-16   | 0.711563749 | 0.31  | 0.264 | 6.79E-12    | 5 LSP1P4        |
| 8.57E-18   | 0.697356855 | 0.296 | 0.242 | 2.75E-13    | 5 ACO1          |
| 3.46E-78   | 0.691947984 | 0.655 | 0.507 | 1.11E-73    | 5 RNF152        |
| 0.00252443 | 0.691179998 | 0.366 | 0.445 | 1           | 5 AGPAT3        |
| 1.97E-06   | 0.67922201  | 0.282 | 0.277 | 0.063247137 | 5 SCTR          |
| 0.00942951 | 0.679121206 | 0.337 | 0.406 | 1           | 5 SUCLG1        |
| 5.32E-06   | 0.676458677 | 0.27  | 0.268 | 0.170922479 | 5 CRYZL2P-SEC10 |
| 8.99E-19   | 0.671733168 | 0.261 | 0.198 | 2.89E-14    | 5 GIPC2         |
| 2.39E-23   | 0.669989514 | 0.312 | 0.238 | 7.67E-19    | 5 ARHGAP42      |
| 2.33E-14   | 0.669661093 | 0.332 | 0.29  | 7.49E-10    | 5 LINC01515     |
| 0.00193249 | 0.664241423 | 0.277 | 0.301 | 1           | 5 TUBGCP2       |
| 1.65E-10   | 0.664152323 | 0.47  | 0.55  | 5.28E-06    | 5 NPIPB12       |
| 1.65E-45   | 0.650333771 | 0.692 | 0.784 | 5.30E-41    | 5 CUX1          |
| 1.93E-50   | 0.643465138 | 0.805 | 0.887 | 6.19E-46    | 5 SYNE2         |
| 5.15E-15   | 0.638126903 | 0.373 | 0.341 | 1.66E-10    | 5 C9            |
| 1.69E-09   | 0.62912891  | 0.453 | 0.525 | 5.44E-05    | 5 MICU1         |
| 0.00377154 | 0.624112324 | 0.264 | 0.284 | 1           | 5 SELENOO       |
| 0.00058765 | 0.623281397 | 0.338 | 0.376 | 1           | 5 SLC43A2       |
| 0.00921516 | 0.605061283 | 0.385 | 0.473 | 1           | 5 KIF12         |
| 0.00100397 | 0.601604397 | 0.408 | 0.504 | 1           | 5 ATXN7L1       |
| 1.88E-14   | 0.600571949 | 0.368 | 0.33  | 6.02E-10    | 5 PRLR          |
| 3.69E-14   | 0.597237305 | 0.31  | 0.257 | 1.19E-09    | 5 SYT1          |
| 7.32E-33   | 0.596810791 | 0.475 | 0.378 | 2.35E-28    | 5 CLDN10        |
| 0.00717468 | 0.595028529 | 0.283 | 0.313 | 1           | 5 AC126283.2    |
| 0.00114354 | 0.59240048  | 0.291 | 0.311 | 1           | 5 LINC02334     |
| 1.40E-99   | 0.591599958 | 0.963 | 0.963 | 4.49E-95    | 5 NEAT1         |
| 1.26E-30   | 0.589960648 | 0.556 | 0.508 | 4.04E-26    | 5 EPB41L3       |
| 1.68E-18   | 0.584131482 | 0.51  | 0.52  | 5.39E-14    | 5 PCLO          |
| 3.93E-22   | 0.573912557 | 0.333 | 0.259 | 1.26E-17    | 5 ARHGAP10      |
| 6.19E-10   | 0.571557258 | 0.398 | 0.397 | 1.99E-05    | 5 PDGFC         |
| 0.00733694 | 0.565654235 | 0.403 | 0.497 | 1           | 5 CCDC30        |
| 8.65E-06   | 0.565345077 | 0.437 | 0.514 | 0.277655337 | 5 ZHX3          |
| 3.96E-14   | 0.560116724 | 0.346 | 0.303 | 1.27E-09    | 5 ALCAM         |
| 0.00292464 | 0.558885817 | 0.426 | 0.541 | 1           | 5 LARP4         |
| 0.00528132 | 0.557940444 | 0.372 | 0.435 | 1           | 5 AC093423.3    |
| 1.36E-42   | 0.540479818 | 0.739 | 0.767 | 4.37E-38    | 5 CDK14         |
| 1.52E-09   | 0.532679741 | 0.424 | 0.42  | 4.88E-05    | 5 ANK2          |
| 3.64E-10   | 0.530323365 | 0.565 | 0.717 | 1.17E-05    | 5 SON           |
| 0.00023859 | 0.523520149 | 0.462 | 0.565 | 1           | 5 AIG1          |
| 1.41E-07   | 0.515681191 | 0.51  | 0.638 | 0.004541411 | 5 GLG1          |

|            |             |       |       |             |              |
|------------|-------------|-------|-------|-------------|--------------|
| 8.25E-10   | 0.506890154 | 0.411 | 0.392 | 2.65E-05    | 5 SGO1-AS1   |
| 2.53E-20   | 0.504904152 | 0.462 | 0.423 | 8.11E-16    | 5 PDK4       |
| 0.00064178 | 0.503838546 | 0.487 | 0.634 | 1           | 5 TSPAN9     |
| 4.17E-07   | 0.499269864 | 0.216 | 0.337 | 0.013388555 | 5 TUBGCP3    |
| 1.29E-18   | 0.496766229 | 0.58  | 0.588 | 4.13E-14    | 5 TRABD2B    |
| 8.81E-32   | 0.495893384 | 0.477 | 0.384 | 2.83E-27    | 5 RERG       |
| 0.007807   | 0.483609301 | 0.473 | 0.585 | 1           | 5 FOXO3      |
| 0.00154192 | 0.461402805 | 0.269 | 0.384 | 1           | 5 HIVEP1     |
| 9.39E-05   | 0.458898872 | 0.448 | 0.517 | 1           | 5 DENND5B    |
| 0.00247524 | 0.458647693 | 0.294 | 0.432 | 1           | 5 WDR59      |
| 0.00032309 | 0.452741058 | 0.22  | 0.316 | 1           | 5 MT-ATP6    |
| 1.66E-11   | 0.450775808 | 0.514 | 0.573 | 5.34E-07    | 5 VMP1       |
| 2.35E-05   | 0.446151642 | 0.253 | 0.236 | 0.755188384 | 5 RGL1       |
| 0.00022724 | 0.445021564 | 0.278 | 0.408 | 1           | 5 BOD1L1     |
| 0.00590094 | 0.439026939 | 0.239 | 0.33  | 1           | 5 PER3       |
| 0.00014122 | 0.432730086 | 0.292 | 0.443 | 1           | 5 SPG7       |
| 1.35E-40   | 0.428666133 | 0.742 | 0.657 | 4.34E-36    | 5 MAST4      |
| 5.73E-11   | 0.426676264 | 0.424 | 0.411 | 1.84E-06    | 5 GRB10      |
| 7.93E-16   | 0.424138564 | 0.692 | 0.779 | 2.55E-11    | 5 IGF1R      |
| 0.00013768 | 0.42016931  | 0.214 | 0.313 | 1           | 5 ZER1       |
| 0.00096865 | 0.419686157 | 0.183 | 0.257 | 1           | 5 AP3D1      |
| 1.80E-07   | 0.418559423 | 0.439 | 0.453 | 0.005787679 | 5 GALNT14    |
| 0.00235486 | 0.418446901 | 0.304 | 0.446 | 1           | 5 CWF19L2    |
| 7.97E-25   | 0.417062113 | 0.719 | 0.85  | 2.56E-20    | 5 IGF2R      |
| 6.91E-07   | 0.415528876 | 0.219 | 0.336 | 0.022185351 | 5 DDX24      |
| 0.00017759 | 0.414327107 | 0.33  | 0.499 | 1           | 5 AP2A2      |
| 9.85E-08   | 0.414160818 | 0.302 | 0.482 | 0.003162596 | 5 SPEN       |
| 1.07E-05   | 0.413956059 | 0.282 | 0.432 | 0.343787181 | 5 PPP2R2D    |
| 3.15E-06   | 0.411675538 | 0.293 | 0.453 | 0.101062192 | 5 TRIP11     |
| 0.00757457 | 0.408201458 | 0.198 | 0.271 | 1           | 5 PBLD       |
| 1.50E-11   | 0.405215099 | 0.583 | 0.651 | 4.81E-07    | 5 TTC28      |
| 1.45E-36   | 0.400198905 | 0.819 | 0.87  | 4.64E-32    | 5 PATJ       |
| 6.08E-27   | 0.396390675 | 0.668 | 0.735 | 1.95E-22    | 5 DIP2C      |
| 0.00086929 | 0.39535726  | 0.22  | 0.31  | 1           | 5 ZNF75D     |
| 1.85E-08   | 0.394704748 | 0.285 | 0.463 | 0.000593354 | 5 PRPF4B     |
| 0.0004966  | 0.393872326 | 0.287 | 0.415 | 1           | 5 RNMT       |
| 0.00144382 | 0.393698134 | 0.397 | 0.446 | 1           | 5 DEPTOR     |
| 3.41E-09   | 0.386780569 | 0.222 | 0.363 | 0.00010942  | 5 ZC3H7A     |
| 0.00010857 | 0.382924518 | 0.305 | 0.461 | 1           | 5 DGLUCY     |
| 0.00044641 | 0.382896512 | 0.345 | 0.522 | 1           | 5 TPT1-AS1   |
| 0.00035731 | 0.37765638  | 0.218 | 0.312 | 1           | 5 GALNT2     |
| 7.20E-05   | 0.376934919 | 0.511 | 0.598 | 1           | 5 PTPRJ      |
| 1.22E-09   | 0.376569301 | 0.191 | 0.314 | 3.91E-05    | 5 HSPD1      |
| 0.00011581 | 0.374688286 | 0.299 | 0.448 | 1           | 5 LARP1      |
| 0.00137565 | 0.373933162 | 0.261 | 0.257 | 1           | 5 TGFB3      |
| 1.08E-05   | 0.371452379 | 0.607 | 0.804 | 0.346634919 | 5 PNISR      |
| 1.66E-07   | 0.370042488 | 0.265 | 0.417 | 0.005326207 | 5 WASH3P     |
| 2.28E-07   | 0.368294261 | 0.225 | 0.35  | 0.007327648 | 5 ARID4A     |
| 0.00143801 | 0.36660557  | 0.355 | 0.535 | 1           | 5 DNMT       |
| 1.22E-07   | 0.366383687 | 0.156 | 0.25  | 0.00392272  | 5 AC010210.1 |
| 4.58E-51   | 0.365849578 | 0.739 | 0.604 | 1.47E-46    | 5 TRPM3      |

|            |             |       |       |             |              |
|------------|-------------|-------|-------|-------------|--------------|
| 0.00394618 | 0.365424018 | 0.183 | 0.25  | 1           | 5 SLC38A10   |
| 0.00105951 | 0.364882697 | 0.346 | 0.511 | 1           | 5 DYNC2I1    |
| 0.0097991  | 0.362772671 | 0.214 | 0.283 | 1           | 5 LINC01572  |
| 8.46E-08   | 0.356450051 | 0.227 | 0.358 | 0.002717144 | 5 NSUN6      |
| 0.00065245 | 0.35582723  | 0.317 | 0.464 | 1           | 5 LCLAT1     |
| 0.0002322  | 0.355626956 | 0.285 | 0.41  | 1           | 5 ACAD11     |
| 0.00227735 | 0.353439724 | 0.555 | 0.71  | 1           | 5 REV3L      |
| 1.54E-05   | 0.353302827 | 0.226 | 0.338 | 0.494899624 | 5 GPR89B     |
| 2.02E-11   | 0.349302725 | 0.435 | 0.395 | 6.50E-07    | 5 CNTN4      |
| 8.41E-29   | 0.349038966 | 0.786 | 0.805 | 2.70E-24    | 5 PLEKHA5    |
| 1.08E-05   | 0.34861835  | 0.182 | 0.271 | 0.346657566 | 5 CYP4V2     |
| 7.08E-10   | 0.345784    | 0.294 | 0.249 | 2.27E-05    | 5 AC012593.1 |
| 8.01E-05   | 0.343828843 | 0.216 | 0.316 | 1           | 5 COQ4       |
| 2.90E-09   | 0.342056176 | 0.166 | 0.273 | 9.32E-05    | 5 FMR1       |
| 7.11E-07   | 0.340925136 | 0.169 | 0.261 | 0.022838547 | 5 MT-CYB     |
| 5.27E-12   | 0.338706981 | 0.246 | 0.415 | 1.69E-07    | 5 UPF2       |
| 1.43E-10   | 0.336389599 | 0.191 | 0.321 | 4.61E-06    | 5 FAM177A1   |
| 1.13E-06   | 0.33574821  | 0.273 | 0.419 | 0.036168061 | 5 CCNL2      |
| 8.63E-10   | 0.3339567   | 0.213 | 0.349 | 2.77E-05    | 5 MLH3       |
| 1.51E-11   | 0.330435241 | 0.223 | 0.374 | 4.84E-07    | 5 HSDL2      |
| 2.10E-05   | 0.329425819 | 0.351 | 0.535 | 0.674048239 | 5 CCNL1      |
| 2.82E-09   | 0.329322603 | 0.282 | 0.461 | 9.07E-05    | 5 SLC25A16   |
| 0.00232246 | 0.327919848 | 0.237 | 0.329 | 1           | 5 HPCAL1     |
| 0.00418913 | 0.327359705 | 0.397 | 0.589 | 1           | 5 AC008695.1 |
| 7.37E-11   | 0.326908943 | 0.249 | 0.417 | 2.37E-06    | 5 GAPVD1     |
| 2.00E-06   | 0.326639563 | 0.222 | 0.336 | 0.064377629 | 5 SPEF2      |
| 6.31E-05   | 0.325893529 | 0.195 | 0.282 | 1           | 5 FN3K       |
| 4.94E-05   | 0.32361849  | 0.173 | 0.251 | 1           | 5 PLIN5      |
| 5.37E-06   | 0.323447318 | 0.37  | 0.581 | 0.172320099 | 5 TCF25      |
| 1.29E-32   | 0.321953231 | 0.88  | 0.918 | 4.16E-28    | 5 GPHN       |
| 2.41E-13   | 0.321084337 | 0.269 | 0.467 | 7.73E-09    | 5 STAG3L3    |
| 1.35E-05   | 0.32083402  | 0.175 | 0.258 | 0.43474828  | 5 WASH2P     |
| 4.33E-05   | 0.320603351 | 0.339 | 0.51  | 1           | 5 TBC1D19    |
| 2.71E-06   | 0.319546434 | 0.225 | 0.34  | 0.087183872 | 5 NFATC3     |
| 1.07E-09   | 0.318669612 | 0.173 | 0.283 | 3.45E-05    | 5 EIF5B      |
| 1.37E-08   | 0.31745306  | 0.214 | 0.342 | 0.000440376 | 5 WBP1L      |
| 4.43E-08   | 0.315042955 | 0.208 | 0.327 | 0.001421591 | 5 ERBB2      |
| 9.26E-14   | 0.313317059 | 0.249 | 0.432 | 2.97E-09    | 5 NFIC       |
| 4.39E-07   | 0.31006948  | 0.193 | 0.297 | 0.014102196 | 5 L2HGDH     |
| 1.40E-06   | 0.309355088 | 0.274 | 0.416 | 0.045031855 | 5 OGDHL      |
| 2.91E-09   | 0.306355116 | 0.182 | 0.295 | 9.35E-05    | 5 TRMT11     |
| 4.42E-09   | 0.304848846 | 0.176 | 0.285 | 0.000141967 | 5 ZNF737     |
| 1.44E-08   | 0.303623149 | 0.158 | 0.255 | 0.000463664 | 5 TRIP4      |
| 1.79E-12   | 0.298529999 | 0.282 | 0.485 | 5.75E-08    | 5 THRAP3     |
| 6.80E-07   | 0.296154127 | 0.169 | 0.26  | 0.021843925 | 5 PACS2      |
| 3.83E-18   | 0.295975909 | 0.158 | 0.303 | 1.23E-13    | 5 RGPD3      |
| 1.10E-09   | 0.29568432  | 0.231 | 0.373 | 3.52E-05    | 5 TTC21B     |
| 9.14E-12   | 0.295217541 | 0.278 | 0.472 | 2.94E-07    | 5 SUN1       |
| 2.33E-24   | 0.2924613   | 0.65  | 0.571 | 7.48E-20    | 5 RALYL      |
| 1.72E-07   | 0.29236475  | 0.16  | 0.25  | 0.005518234 | 5 FAM193B    |
| 5.47E-06   | 0.289891917 | 0.171 | 0.254 | 0.17564901  | 5 AC012531.3 |



|            |             |       |       |             |                |
|------------|-------------|-------|-------|-------------|----------------|
| 2.99E-07   | 0.289431715 | 0.203 | 0.312 | 0.009611875 | 5 FMO4         |
| 1.90E-05   | 0.288763892 | 0.355 | 0.543 | 0.610883906 | 5 IFT88        |
| 2.00E-16   | 0.287861928 | 0.182 | 0.334 | 6.44E-12    | 5 XIAP         |
| 1.65E-10   | 0.2863444   | 0.272 | 0.447 | 5.31E-06    | 5 MPHOSPH8     |
| 1.37E-07   | 0.283737947 | 0.674 | 0.738 | 0.004397071 | 5 AC008014.1   |
| 0.00010852 | 0.283093953 | 0.326 | 0.476 | 1           | 5 ZFAND5       |
| 2.89E-09   | 0.282705814 | 0.154 | 0.253 | 9.28E-05    | 5 DNAJC16      |
| 0.00514282 | 0.28036578  | 0.404 | 0.585 | 1           | 5 CFLAR        |
| 6.13E-17   | 0.277926497 | 0.257 | 0.465 | 1.97E-12    | 5 BCL2L2-PABPN |
| 1.85E-13   | 0.276104984 | 0.256 | 0.44  | 5.96E-09    | 5 DDX46        |
| 2.06E-08   | 0.275862276 | 0.161 | 0.256 | 0.00066288  | 5 ZNF429       |
| 3.40E-06   | 0.273425162 | 0.374 | 0.58  | 0.109176995 | 5 PHF3         |
| 6.07E-06   | 0.270804083 | 0.301 | 0.454 | 0.195067909 | 5 AF127577.4   |
| 5.51E-16   | 0.270219037 | 0.213 | 0.383 | 1.77E-11    | 5 SUGP2        |
| 2.93E-26   | 0.266368233 | 0.267 | 0.17  | 9.40E-22    | 5 BX571818.1   |
| 1.51E-07   | 0.266275599 | 0.283 | 0.434 | 0.004857059 | 5 GSE1         |
| 5.16E-13   | 0.265646204 | 0.174 | 0.302 | 1.66E-08    | 5 NDUFV1       |
| 3.41E-14   | 0.265468333 | 0.18  | 0.321 | 1.09E-09    | 5 ACADM        |
| 2.40E-10   | 0.265298382 | 0.178 | 0.295 | 7.70E-06    | 5 GTF2E2       |
| 0.00053467 | 0.26478598  | 0.275 | 0.388 | 1           | 5 PLXNB1       |
| 2.11E-104  | 0.264134277 | 1     | 1     | 6.79E-100   | 5 LINC00486    |
| 1.22E-11   | 0.263223524 | 0.214 | 0.356 | 3.91E-07    | 5 AL592183.1   |
| 3.71E-10   | 0.260720144 | 0.202 | 0.327 | 1.19E-05    | 5 MAPK8IP3     |
| 0.00082983 | 0.260621851 | 0.451 | 0.678 | 1           | 5 HCG17        |
| 2.55E-07   | 0.257764575 | 0.437 | 0.42  | 0.008192781 | 5 LINC01320    |
| 0.00103227 | 0.257716277 | 0.26  | 0.357 | 1           | 5 SLC16A10     |
| 3.61E-07   | 0.25543187  | 0.204 | 0.309 | 0.011605561 | 5 CEMIP2       |
| 5.09E-13   | 0.254729258 | 0.301 | 0.512 | 1.64E-08    | 5 SMG1P3       |
| 7.26E-11   | 0.252382177 | 0.206 | 0.336 | 2.33E-06    | 5 MT-ND5       |
| 2.23E-06   | 0.251675871 | 0.235 | 0.348 | 0.071767791 | 5 KIF21A       |
| 1.28E-16   | 0.251205764 | 0.151 | 0.286 | 4.11E-12    | 5 IARS1        |
| 1.12E-11   | 0.251151922 | 0.184 | 0.31  | 3.58E-07    | 5 GPR89A       |
| 2.53E-10   | 0.250965349 | 0.196 | 0.32  | 8.12E-06    | 5 RRAS2        |
| 0          | 3.108086012 | 1     | 0.215 | 0           | 6 SLC12A1      |
| 0          | 2.731390521 | 0.955 | 0.169 | 0           | 6 UMOD         |
| 0          | 2.715351013 | 0.958 | 0.173 | 0           | 6 RP1          |
| 0          | 2.619042012 | 0.861 | 0.129 | 0           | 6 AC092078.2   |
| 0          | 2.530848769 | 0.998 | 0.324 | 0           | 6 PLCB1        |
| 0          | 2.155054323 | 0.917 | 0.283 | 0           | 6 RBFOX1       |
| 0          | 1.999902836 | 0.991 | 0.353 | 0           | 6 CACNA2D3     |
| 0          | 1.980285771 | 0.832 | 0.097 | 0           | 6 NTRK2        |
| 0          | 1.947258346 | 0.881 | 0.265 | 0           | 6 PHACTR1      |
| 0          | 1.933973093 | 0.884 | 0.091 | 0           | 6 GP2          |
| 0          | 1.921808513 | 0.962 | 0.373 | 0           | 6 EGF          |
| 0          | 1.920666644 | 0.919 | 0.235 | 0           | 6 ESRRB        |
| 0          | 1.881231709 | 0.846 | 0.244 | 0           | 6 LINC02343    |
| 0          | 1.80306049  | 0.886 | 0.441 | 0           | 6 GPC5         |
| 0          | 1.790383587 | 0.845 | 0.206 | 0           | 6 HS6ST2       |
| 0          | 1.770132671 | 0.776 | 0.194 | 0           | 6 SLC4A7       |
| 0          | 1.75789364  | 0.862 | 0.332 | 0           | 6 NELL1        |
| 0          | 1.680745027 | 0.998 | 0.753 | 0           | 6 ERBB4        |

|           |             |       |       |           |              |
|-----------|-------------|-------|-------|-----------|--------------|
| 0         | 1.678819922 | 0.913 | 0.351 | 0         | 6 PCDH9      |
| 0         | 1.673899817 | 0.953 | 0.493 | 0         | 6 RHOBTB3    |
| 0         | 1.620692971 | 0.92  | 0.253 | 0         | 6 SGIP1      |
| 0         | 1.607721173 | 0.931 | 0.495 | 0         | 6 AL137782.1 |
| 0         | 1.589486768 | 0.74  | 0.106 | 0         | 6 ACP3       |
| 0         | 1.588366906 | 0.932 | 0.308 | 0         | 6 LINC01762  |
| 0         | 1.534695654 | 0.805 | 0.087 | 0         | 6 SIM2       |
| 0         | 1.512235177 | 0.929 | 0.436 | 0         | 6 KLHL13     |
| 0         | 1.49202893  | 0.97  | 0.459 | 0         | 6 PDE1A      |
| 0         | 1.472578181 | 0.775 | 0.306 | 0         | 6 CREB3L2    |
| 0         | 1.468965711 | 0.968 | 0.555 | 0         | 6 CLCN5      |
| 0         | 1.465424669 | 0.623 | 0.107 | 0         | 6 SCHLAP1    |
| 0         | 1.46425206  | 0.893 | 0.427 | 0         | 6 PPM1L      |
| 0         | 1.447871097 | 0.804 | 0.234 | 0         | 6 SCD5       |
| 0         | 1.447465273 | 0.79  | 0.247 | 0         | 6 SEMA6D     |
| 0         | 1.445482103 | 0.712 | 0.212 | 0         | 6 ENOX1      |
| 0         | 1.442069304 | 0.945 | 0.325 | 0         | 6 LINC01606  |
| 0         | 1.432033326 | 0.488 | 0.092 | 0         | 6 KCTD16     |
| 0         | 1.407292336 | 0.954 | 0.55  | 0         | 6 USP53      |
| 0         | 1.398033526 | 0.937 | 0.465 | 0         | 6 CCDC148    |
| 6.24E-274 | 1.39432443  | 0.94  | 0.605 | 2.00E-269 | 6 AC058822.1 |
| 1.10E-268 | 1.382563009 | 0.892 | 0.483 | 3.54E-264 | 6 DSCAML1    |
| 0         | 1.382394419 | 0.95  | 0.459 | 0         | 6 FKBP5      |
| 1.02E-206 | 1.376882941 | 0.289 | 0.062 | 3.27E-202 | 6 TMEM132C   |
| 0         | 1.368720679 | 0.751 | 0.179 | 0         | 6 NRK        |
| 0         | 1.349821742 | 0.954 | 0.398 | 0         | 6 SLC16A12   |
| 0         | 1.347816971 | 0.672 | 0.19  | 0         | 6 TENM4      |
| 0         | 1.326861085 | 0.687 | 0.108 | 0         | 6 TCIM       |
| 3.97E-193 | 1.324043013 | 0.919 | 0.598 | 1.28E-188 | 6 MRPS6      |
| 0         | 1.314053792 | 0.944 | 0.35  | 0         | 6 CLDN10     |
| 1.01E-303 | 1.304584817 | 0.968 | 0.532 | 3.24E-299 | 6 EFNA5      |
| 0         | 1.304096003 | 0.819 | 0.333 | 0         | 6 LINC00970  |
| 0         | 1.29412406  | 0.991 | 0.773 | 0         | 6 PKP4       |
| 0         | 1.289713956 | 1     | 0.78  | 0         | 6 CCSER1     |
| 1.08E-270 | 1.282396512 | 0.863 | 0.416 | 3.47E-266 | 6 THSD4      |
| 2.69E-145 | 1.271834352 | 0.361 | 0.115 | 8.64E-141 | 6 PAPP2      |
| 0         | 1.270610373 | 0.76  | 0.231 | 0         | 6 RANBP3L    |
| 0         | 1.268659677 | 0.484 | 0.088 | 0         | 6 RBM20      |
| 0         | 1.266057794 | 0.755 | 0.158 | 0         | 6 PRKX       |
| 0         | 1.258900847 | 0.909 | 0.397 | 0         | 6 STK32B     |
| 0         | 1.250805596 | 0.93  | 0.26  | 0         | 6 CASR       |
| 0         | 1.248788588 | 0.807 | 0.223 | 0         | 6 AC068631.1 |
| 1.57E-271 | 1.245243807 | 0.961 | 0.599 | 5.03E-267 | 6 KCNIP4     |
| 1.34E-151 | 1.242397106 | 0.86  | 0.546 | 4.29E-147 | 6 P3H2       |
| 0         | 1.236551715 | 0.659 | 0.114 | 0         | 6 SPATC1     |
| 1.14E-294 | 1.234290905 | 0.544 | 0.151 | 3.66E-290 | 6 AP1S3      |
| 3.05E-188 | 1.23390806  | 0.791 | 0.415 | 9.79E-184 | 6 BICDL1     |
| 0         | 1.22945792  | 0.87  | 0.357 | 0         | 6 EFHD1      |
| 0         | 1.226405331 | 0.836 | 0.249 | 0         | 6 CA10       |
| 0         | 1.215551746 | 0.788 | 0.282 | 0         | 6 UGT8       |
| 0         | 1.213961049 | 0.83  | 0.345 | 0         | 6 TMEM72-AS1 |

|           |             |       |       |           |               |
|-----------|-------------|-------|-------|-----------|---------------|
| 5.83E-296 | 1.211649557 | 0.945 | 0.567 | 1.87E-291 | 6 CPEB3       |
| 0         | 1.200686163 | 0.98  | 0.61  | 0         | 6 ATP1A1      |
| 3.84E-274 | 1.196281456 | 0.979 | 0.707 | 1.23E-269 | 6 CGNL1       |
| 0         | 1.191691283 | 0.599 | 0.125 | 0         | 6 CALCR       |
| 1.32E-210 | 1.1820792   | 0.583 | 0.217 | 4.24E-206 | 6 NPSR1-AS1   |
| 6.58E-270 | 1.176164845 | 0.587 | 0.184 | 2.11E-265 | 6 PPFIA2      |
| 2.10E-231 | 1.173452076 | 0.481 | 0.146 | 6.74E-227 | 6 PXDNL       |
| 3.82E-286 | 1.162571485 | 0.942 | 0.55  | 1.23E-281 | 6 TBC1D4      |
| 1.98E-257 | 1.156536941 | 0.784 | 0.345 | 6.36E-253 | 6 MGAT5       |
| 2.42E-291 | 1.149434968 | 0.925 | 0.477 | 7.76E-287 | 6 HIP1        |
| 1.12E-293 | 1.136813359 | 0.994 | 0.732 | 3.61E-289 | 6 ARHGAP6     |
| 1.33E-285 | 1.136025008 | 0.982 | 0.7   | 4.28E-281 | 6 ATP1B1      |
| 0         | 1.135316953 | 0.725 | 0.243 | 0         | 6 PANTR1      |
| 0         | 1.117119737 | 0.675 | 0.185 | 0         | 6 TLE1        |
| 0         | 1.106568224 | 0.31  | 0.037 | 0         | 6 BMP6        |
| 0         | 1.105064242 | 0.557 | 0.127 | 0         | 6 FXYD6-FXYD2 |
| 5.14E-153 | 1.093323346 | 0.466 | 0.175 | 1.65E-148 | 6 FOXP2       |
| 7.62E-253 | 1.071497044 | 0.736 | 0.306 | 2.45E-248 | 6 ZNF98       |
| 0         | 1.071104943 | 0.659 | 0.16  | 0         | 6 F11         |
| 0         | 1.061176081 | 0.666 | 0.195 | 0         | 6 GNAI1       |
| 5.68E-287 | 1.056929501 | 1     | 0.875 | 1.82E-282 | 6 ESRRG       |
| 9.86E-305 | 1.052557883 | 0.966 | 0.509 | 3.17E-300 | 6 OSBPL3      |
| 3.18E-229 | 1.046963677 | 0.894 | 0.518 | 1.02E-224 | 6 AK3         |
| 1.26E-182 | 1.042117853 | 0.901 | 0.582 | 4.05E-178 | 6 PTPN4       |
| 0         | 1.039727867 | 0.735 | 0.252 | 0         | 6 NUDT4       |
| 1.00E-291 | 1.034769625 | 0.646 | 0.214 | 3.22E-287 | 6 COL28A1     |
| 1.46E-278 | 1.026320093 | 0.849 | 0.389 | 4.69E-274 | 6 ARHGEF38    |
| 8.53E-56  | 1.022801141 | 0.562 | 0.365 | 2.74E-51  | 6 SAMD4A      |
| 1.21E-203 | 1.021711838 | 0.889 | 0.533 | 3.87E-199 | 6 CYFIP2      |
| 2.12E-220 | 1.01738959  | 0.851 | 0.438 | 6.79E-216 | 6 STK39       |
| 9.03E-302 | 1.0086963   | 0.704 | 0.229 | 2.90E-297 | 6 LINC01182   |
| 6.63E-124 | 1.005249735 | 0.591 | 0.288 | 2.13E-119 | 6 ALCAM       |
| 1.10E-211 | 0.99796519  | 0.795 | 0.372 | 3.55E-207 | 6 INPP4B      |
| 2.75E-175 | 0.987221089 | 0.967 | 0.728 | 8.85E-171 | 6 OXR1        |
| 0         | 0.985160324 | 0.45  | 0.044 | 0         | 6 GRM1        |
| 5.52E-187 | 0.984390271 | 0.405 | 0.122 | 1.77E-182 | 6 RIMS2       |
| 6.27E-262 | 0.977524406 | 0.763 | 0.299 | 2.01E-257 | 6 UPP2        |
| 3.40E-153 | 0.974434322 | 0.522 | 0.206 | 1.09E-148 | 6 FGF14       |
| 2.10E-240 | 0.971684358 | 0.35  | 0.076 | 6.74E-236 | 6 SORCS3      |
| 4.30E-240 | 0.971517578 | 0.829 | 0.369 | 1.38E-235 | 6 MYO3B       |
| 1.87E-207 | 0.968304411 | 0.889 | 0.526 | 5.99E-203 | 6 HIBADH      |
| 1.25E-273 | 0.966304727 | 0.893 | 0.392 | 4.01E-269 | 6 LINC01320   |
| 4.33E-236 | 0.962424231 | 0.964 | 0.583 | 1.39E-231 | 6 AC012409.2  |
| 0         | 0.961653598 | 0.872 | 0.342 | 0         | 6 CACNB2      |
| 8.83E-177 | 0.958791194 | 0.798 | 0.42  | 2.84E-172 | 6 DEPTOR      |
| 4.08E-177 | 0.952981758 | 0.611 | 0.248 | 1.31E-172 | 6 HOMER1      |
| 0         | 0.950684232 | 0.697 | 0.193 | 0         | 6 SLCO3A1     |
| 1.49E-200 | 0.949521737 | 0.893 | 0.484 | 4.77E-196 | 6 LRP1B       |
| 7.67E-157 | 0.948573924 | 0.795 | 0.403 | 2.46E-152 | 6 PDK4        |
| 0         | 0.948548711 | 0.42  | 0.054 | 0         | 6 LYPD6       |
| 0         | 0.945077193 | 0.44  | 0.074 | 0         | 6 GABRB1      |

|           |             |       |       |           |                |
|-----------|-------------|-------|-------|-----------|----------------|
| 0         | 0.943257337 | 0.548 | 0.115 | 0         | 6 GUCY1A1      |
| 3.18E-150 | 0.939454223 | 0.936 | 0.658 | 1.02E-145 | 6 NHS          |
| 8.50E-133 | 0.938927232 | 0.966 | 0.778 | 2.73E-128 | 6 PLCL1        |
| 1.46E-186 | 0.938815048 | 0.804 | 0.435 | 4.69E-182 | 6 LMO7         |
| 5.10E-192 | 0.931229982 | 0.724 | 0.341 | 1.64E-187 | 6 MOB3B        |
| 0         | 0.925258509 | 0.74  | 0.258 | 0         | 6 MTURN        |
| 0         | 0.904157927 | 0.687 | 0.215 | 0         | 6 ADGRV1       |
| 6.14E-212 | 0.904021921 | 0.963 | 0.653 | 1.97E-207 | 6 PPARGC1A     |
| 1.27E-231 | 0.90234927  | 0.597 | 0.206 | 4.08E-227 | 6 PRDM16-DT    |
| 5.61E-155 | 0.901600914 | 0.436 | 0.154 | 1.80E-150 | 6 RGS6         |
| 0         | 0.900497116 | 0.478 | 0.046 | 0         | 6 AC087045.3   |
| 2.47E-62  | 0.896599731 | 0.286 | 0.123 | 7.94E-58  | 6 COL8A1       |
| 4.06E-62  | 0.895840207 | 0.644 | 0.404 | 1.30E-57  | 6 ACSL4        |
| 9.75E-218 | 0.892165109 | 0.801 | 0.407 | 3.13E-213 | 6 FBXL4        |
| 2.53E-215 | 0.890220794 | 0.876 | 0.488 | 8.12E-211 | 6 TMEM161B-AS1 |
| 3.48E-268 | 0.888593225 | 0.76  | 0.307 | 1.12E-263 | 6 CFAP221      |
| 3.66E-269 | 0.887051643 | 0.647 | 0.218 | 1.17E-264 | 6 PANK1        |
| 7.72E-170 | 0.884054772 | 0.604 | 0.243 | 2.48E-165 | 6 ITGB6        |
| 0         | 0.882926397 | 0.397 | 0.042 | 0         | 6 LINC02432    |
| 1.22E-206 | 0.880145666 | 0.818 | 0.37  | 3.92E-202 | 6 ZDHHC14      |
| 1.38E-145 | 0.876746687 | 0.808 | 0.473 | 4.42E-141 | 6 SLC20A2      |
| 2.73E-203 | 0.871523267 | 0.952 | 0.597 | 8.78E-199 | 6 PRKD1        |
| 2.64E-131 | 0.867257968 | 0.476 | 0.191 | 8.49E-127 | 6 AC004870.4   |
| 1.60E-175 | 0.864956356 | 0.606 | 0.255 | 5.13E-171 | 6 MALRD1       |
| 4.37E-64  | 0.864734644 | 0.381 | 0.182 | 1.40E-59  | 6 MIR222HG     |
| 9.18E-151 | 0.86460014  | 0.642 | 0.296 | 2.95E-146 | 6 AC087564.1   |
| 5.88E-201 | 0.864535511 | 0.826 | 0.396 | 1.89E-196 | 6 SLC16A7      |
| 1.88E-270 | 0.864475999 | 0.525 | 0.147 | 6.04E-266 | 6 LAMA1        |
| 1.28E-172 | 0.860866806 | 0.847 | 0.409 | 4.10E-168 | 6 CPM          |
| 0         | 0.858112269 | 0.353 | 0.05  | 0         | 6 KCND3        |
| 2.06E-187 | 0.856275816 | 0.849 | 0.438 | 6.63E-183 | 6 KCTD1        |
| 1.05E-113 | 0.854295099 | 0.78  | 0.471 | 3.38E-109 | 6 AC138305.1   |
| 0         | 0.853807543 | 0.711 | 0.205 | 0         | 6 SUSD4        |
| 2.11E-87  | 0.8507557   | 0.772 | 0.527 | 6.78E-83  | 6 SVIL         |
| 0         | 0.844838131 | 0.455 | 0.041 | 0         | 6 CXCL12       |
| 5.39E-169 | 0.844616425 | 0.683 | 0.303 | 1.73E-164 | 6 CCDC178      |
| 6.64E-180 | 0.842978188 | 0.954 | 0.662 | 2.13E-175 | 6 ARHGAP24     |
| 1.97E-136 | 0.842363712 | 0.819 | 0.525 | 6.32E-132 | 6 FAM13A       |
| 2.03E-100 | 0.842231857 | 0.85  | 0.608 | 6.51E-96  | 6 STPG2        |
| 2.18E-155 | 0.842201117 | 0.894 | 0.578 | 7.01E-151 | 6 DAB1         |
| 2.07E-145 | 0.840727365 | 0.784 | 0.43  | 6.63E-141 | 6 RNF150       |
| 1.36E-176 | 0.831566557 | 0.66  | 0.296 | 4.37E-172 | 6 MYOF         |
| 2.17E-304 | 0.826868862 | 0.683 | 0.215 | 6.97E-300 | 6 DZIP1        |
| 0         | 0.826570738 | 0.348 | 0.052 | 0         | 6 AC009478.1   |
| 1.65E-126 | 0.823764168 | 0.643 | 0.326 | 5.29E-122 | 6 AC138123.1   |
| 3.34E-193 | 0.822534046 | 0.879 | 0.482 | 1.07E-188 | 6 TRIM2        |
| 7.68E-130 | 0.822089478 | 0.47  | 0.192 | 2.47E-125 | 6 MAPK4        |
| 4.24E-236 | 0.819952433 | 0.715 | 0.286 | 1.36E-231 | 6 MST1L        |
| 5.73E-142 | 0.819370362 | 0.954 | 0.67  | 1.84E-137 | 6 KAZN         |
| 1.73E-264 | 0.814650242 | 0.619 | 0.204 | 5.57E-260 | 6 TPTEP1       |
| 0         | 0.809018444 | 0.459 | 0.1   | 0         | 6 ARFGEF3      |

|           |             |       |       |           |               |
|-----------|-------------|-------|-------|-----------|---------------|
| 8.89E-209 | 0.80706416  | 0.373 | 0.096 | 2.86E-204 | 6 VLDLR-AS1   |
| 1.42E-157 | 0.802783926 | 0.586 | 0.239 | 4.56E-153 | 6 MGLL        |
| 1.90E-134 | 0.802333895 | 0.943 | 0.647 | 6.12E-130 | 6 LGR4        |
| 1.71E-216 | 0.801585916 | 0.882 | 0.495 | 5.51E-212 | 6 PDE4DIP     |
| 0         | 0.801144337 | 0.504 | 0.105 | 0         | 6 SYTL4       |
| 1.56E-189 | 0.800468369 | 0.464 | 0.147 | 5.01E-185 | 6 BDKRB2      |
| 0         | 0.799647975 | 0.509 | 0.08  | 0         | 6 EHF         |
| 9.16E-154 | 0.797719993 | 0.497 | 0.191 | 2.94E-149 | 6 AP000317.2  |
| 1.20E-80  | 0.797196001 | 0.635 | 0.378 | 3.85E-76  | 6 SGO1-AS1    |
| 2.88E-156 | 0.795592095 | 0.776 | 0.399 | 9.25E-152 | 6 ANK2        |
| 1.55E-239 | 0.793096456 | 0.765 | 0.32  | 4.99E-235 | 6 MROH7       |
| 3.60E-155 | 0.792730502 | 0.758 | 0.404 | 1.16E-150 | 6 STXBP4      |
| 2.88E-220 | 0.791179348 | 0.846 | 0.421 | 9.25E-216 | 6 MPC1        |
| 8.04E-235 | 0.789071787 | 0.554 | 0.179 | 2.58E-230 | 6 AC016705.2  |
| 3.00E-133 | 0.788428557 | 0.55  | 0.233 | 9.64E-129 | 6 AC012593.1  |
| 2.06E-165 | 0.788168916 | 0.851 | 0.501 | 6.63E-161 | 6 TAPT1-AS1   |
| 2.09E-191 | 0.786043696 | 0.603 | 0.23  | 6.72E-187 | 6 KHDRBS3     |
| 4.88E-287 | 0.785722622 | 0.542 | 0.152 | 1.57E-282 | 6 SPATA1      |
| 2.25E-278 | 0.779472929 | 0.415 | 0.089 | 7.23E-274 | 6 CNTN1       |
| 3.94E-276 | 0.773314226 | 0.59  | 0.177 | 1.27E-271 | 6 FAM184A     |
| 5.23E-267 | 0.771864592 | 0.51  | 0.134 | 1.68E-262 | 6 AC024022.1  |
| 0         | 0.770545536 | 0.503 | 0.121 | 0         | 6 MFSD4A      |
| 7.30E-181 | 0.769814163 | 0.605 | 0.242 | 2.34E-176 | 6 AC022414.1  |
| 5.09E-206 | 0.767085444 | 0.74  | 0.332 | 1.63E-201 | 6 PDE9A       |
| 7.09E-139 | 0.76627623  | 0.8   | 0.481 | 2.28E-134 | 6 ETNK1       |
| 2.83E-172 | 0.765183459 | 0.678 | 0.315 | 9.08E-168 | 6 NMD3        |
| 1.89E-205 | 0.762402984 | 0.857 | 0.457 | 6.09E-201 | 6 AC241952.1  |
| 2.32E-250 | 0.761330645 | 0.727 | 0.269 | 7.44E-246 | 6 CCND3       |
| 5.86E-158 | 0.76055056  | 0.67  | 0.331 | 1.88E-153 | 6 AHCYL1      |
| 2.30E-127 | 0.749746421 | 0.862 | 0.559 | 7.40E-123 | 6 FOXO3       |
| 1.25E-173 | 0.744643384 | 0.333 | 0.087 | 4.01E-169 | 6 GPC3        |
| 5.25E-176 | 0.740141097 | 0.581 | 0.239 | 1.69E-171 | 6 LPIN1       |
| 2.52E-174 | 0.737986699 | 0.669 | 0.311 | 8.11E-170 | 6 NCBP1       |
| 2.52E-190 | 0.736935383 | 0.454 | 0.138 | 8.09E-186 | 6 NOS1        |
| 1.71E-196 | 0.736369657 | 0.816 | 0.413 | 5.50E-192 | 6 ACOT11      |
| 2.82E-273 | 0.736238326 | 0.601 | 0.183 | 9.07E-269 | 6 CKB         |
| 7.44E-121 | 0.734249735 | 0.8   | 0.493 | 2.39E-116 | 6 PPP1CB      |
| 1.47E-122 | 0.73377356  | 0.868 | 0.541 | 4.73E-118 | 6 ARID5B      |
| 4.44E-186 | 0.733666017 | 0.564 | 0.207 | 1.43E-181 | 6 AL139383.1  |
| 2.40E-93  | 0.733333824 | 0.808 | 0.533 | 7.70E-89  | 6 BCL2        |
| 0         | 0.73224193  | 0.562 | 0.137 | 0         | 6 TFAP2B      |
| 2.10E-257 | 0.73211497  | 0.561 | 0.169 | 6.76E-253 | 6 ABHD17C     |
| 3.54E-167 | 0.728445431 | 0.727 | 0.327 | 1.14E-162 | 6 CADM1       |
| 8.18E-221 | 0.725532476 | 0.281 | 0.053 | 2.63E-216 | 6 LURAP1L-AS1 |
| 1.35E-137 | 0.723773179 | 0.808 | 0.451 | 4.34E-133 | 6 LINC01725   |
| 5.07E-154 | 0.723596928 | 0.742 | 0.374 | 1.63E-149 | 6 SLC3A1      |
| 3.06E-70  | 0.723565856 | 0.665 | 0.399 | 9.84E-66  | 6 MIR4435-2HG |
| 1.30E-176 | 0.721070447 | 0.994 | 0.879 | 4.19E-172 | 6 IMP2L       |
| 7.79E-50  | 0.719931898 | 0.383 | 0.206 | 2.50E-45  | 6 CYTOR       |
| 4.17E-195 | 0.718087707 | 0.575 | 0.207 | 1.34E-190 | 6 OXCT1       |
| 5.31E-265 | 0.717395639 | 0.557 | 0.161 | 1.71E-260 | 6 AGPAT4      |

|           |             |       |       |           |              |
|-----------|-------------|-------|-------|-----------|--------------|
| 9.56E-140 | 0.715533314 | 0.689 | 0.341 | 3.07E-135 | 6 SGPP2      |
| 5.68E-91  | 0.701824364 | 0.676 | 0.379 | 1.82E-86  | 6 FGF13      |
| 4.91E-216 | 0.701605022 | 0.533 | 0.176 | 1.58E-211 | 6 PRDX6-AS1  |
| 4.81E-115 | 0.698376811 | 0.687 | 0.38  | 1.54E-110 | 6 INTS6      |
| 1.54E-142 | 0.697854541 | 0.43  | 0.153 | 4.94E-138 | 6 DENND2A    |
| 7.39E-170 | 0.694370064 | 0.748 | 0.359 | 2.37E-165 | 6 KATNAL2    |
| 3.57E-140 | 0.683624426 | 0.982 | 0.775 | 1.15E-135 | 6 NAALADL2   |
| 2.94E-172 | 0.682947179 | 0.818 | 0.436 | 9.45E-168 | 6 AC245297.3 |
| 9.81E-168 | 0.682598803 | 0.578 | 0.221 | 3.15E-163 | 6 KCNMB2     |
| 4.36E-160 | 0.681484852 | 0.688 | 0.323 | 1.40E-155 | 6 PIK3R1     |
| 1.26E-196 | 0.679160956 | 0.636 | 0.234 | 4.04E-192 | 6 CHL1       |
| 1.33E-165 | 0.677363542 | 0.529 | 0.204 | 4.26E-161 | 6 PPM1K      |
| 1.62E-205 | 0.675916796 | 0.663 | 0.267 | 5.22E-201 | 6 GSAP       |
| 1.05E-97  | 0.675661907 | 0.271 | 0.09  | 3.36E-93  | 6 OPCML      |
| 5.65E-135 | 0.674726483 | 0.769 | 0.416 | 1.81E-130 | 6 GCNT2      |
| 0         | 0.672519721 | 0.446 | 0.081 | 0         | 6 CLDN16     |
| 4.35E-174 | 0.671662311 | 0.608 | 0.235 | 1.40E-169 | 6 LIPA       |
| 1.35E-156 | 0.671384137 | 0.766 | 0.398 | 4.34E-152 | 6 CEP70      |
| 4.26E-144 | 0.668973777 | 0.777 | 0.422 | 1.37E-139 | 6 UBE2E3     |
| 6.07E-202 | 0.668551035 | 0.702 | 0.298 | 1.95E-197 | 6 DNASE1     |
| 9.94E-186 | 0.668158641 | 0.536 | 0.19  | 3.19E-181 | 6 PRKCQ      |
| 2.72E-61  | 0.667727633 | 0.639 | 0.422 | 8.74E-57  | 6 VCL        |
| 3.67E-154 | 0.663833005 | 0.985 | 0.773 | 1.18E-149 | 6 FGD4       |
| 3.31E-127 | 0.661715123 | 0.301 | 0.09  | 1.06E-122 | 6 LONRF3     |
| 9.51E-270 | 0.660318759 | 0.631 | 0.19  | 3.05E-265 | 6 WNK4       |
| 4.30E-138 | 0.660218634 | 0.826 | 0.451 | 1.38E-133 | 6 SSBP2      |
| 6.07E-262 | 0.659733573 | 0.583 | 0.169 | 1.95E-257 | 6 PHF21B     |
| 3.35E-120 | 0.657805956 | 0.895 | 0.605 | 1.08E-115 | 6 ACACB      |
| 8.20E-153 | 0.657233701 | 0.656 | 0.303 | 2.63E-148 | 6 AMMECR1    |
| 5.68E-152 | 0.656231302 | 0.867 | 0.508 | 1.82E-147 | 6 LIFR       |
| 1.65E-114 | 0.654193444 | 0.333 | 0.115 | 5.28E-110 | 6 RGS7       |
| 1.55E-68  | 0.652185435 | 0.384 | 0.183 | 4.96E-64  | 6 MIR646HG   |
| 2.82E-123 | 0.649091696 | 0.501 | 0.216 | 9.06E-119 | 6 LNC-LBCS   |
| 6.30E-105 | 0.648914681 | 0.849 | 0.533 | 2.02E-100 | 6 PRICKLE2   |
| 5.75E-75  | 0.646282261 | 0.384 | 0.178 | 1.85E-70  | 6 TAF41      |
| 1.79E-123 | 0.646250076 | 0.835 | 0.49  | 5.74E-119 | 6 WDFY2      |
| 5.74E-192 | 0.646232102 | 0.268 | 0.054 | 1.84E-187 | 6 LINC01197  |
| 1.52E-168 | 0.645579401 | 0.691 | 0.308 | 4.88E-164 | 6 NR2F2-AS1  |
| 1.90E-186 | 0.643103189 | 0.571 | 0.218 | 6.11E-182 | 6 ACSS1      |
| 1.94E-147 | 0.638388964 | 0.929 | 0.601 | 6.22E-143 | 6 SULT1C2    |
| 9.76E-165 | 0.635802235 | 0.623 | 0.267 | 3.14E-160 | 6 TRMT9B     |
| 1.88E-167 | 0.634441281 | 0.716 | 0.343 | 6.04E-163 | 6 GOT1       |
| 7.39E-147 | 0.63310086  | 0.526 | 0.215 | 2.37E-142 | 6 EGLN3      |
| 1.54E-234 | 0.632770835 | 0.46  | 0.122 | 4.96E-230 | 6 GPR132     |
| 2.41E-176 | 0.630222496 | 0.655 | 0.257 | 7.73E-172 | 6 NRCAM      |
| 3.27E-150 | 0.629933801 | 0.979 | 0.771 | 1.05E-145 | 6 MYO9A      |
| 5.00E-221 | 0.629844067 | 0.615 | 0.208 | 1.61E-216 | 6 KCNJ1      |
| 6.98E-100 | 0.629574918 | 0.6   | 0.302 | 2.24E-95  | 6 GNGT1      |
| 1.14E-88  | 0.628423498 | 0.788 | 0.497 | 3.67E-84  | 6 NAV2       |
| 8.17E-181 | 0.625232291 | 0.566 | 0.211 | 2.62E-176 | 6 FGF9       |
| 4.71E-140 | 0.624811165 | 0.668 | 0.316 | 1.51E-135 | 6 CECR2      |

|           |             |       |       |           |              |
|-----------|-------------|-------|-------|-----------|--------------|
| 7.80E-205 | 0.62458772  | 0.583 | 0.207 | 2.51E-200 | 6 ARRDC3     |
| 5.70E-209 | 0.624091228 | 0.621 | 0.233 | 1.83E-204 | 6 AC244669.2 |
| 1.34E-144 | 0.618481063 | 0.857 | 0.489 | 4.32E-140 | 6 RALGPS1    |
| 5.25E-109 | 0.618054293 | 0.378 | 0.145 | 1.69E-104 | 6 STEAP2-AS1 |
| 8.39E-149 | 0.617688544 | 0.864 | 0.489 | 2.70E-144 | 6 FXYD2      |
| 6.80E-177 | 0.617596954 | 0.575 | 0.217 | 2.18E-172 | 6 SLC2A13    |
| 2.04E-147 | 0.61692849  | 0.897 | 0.488 | 6.54E-143 | 6 SKAP1      |
| 6.08E-183 | 0.613381566 | 0.346 | 0.091 | 1.95E-178 | 6 FAM110C    |
| 1.24E-158 | 0.613175    | 0.517 | 0.191 | 3.99E-154 | 6 MAOA       |
| 6.91E-155 | 0.611815505 | 0.522 | 0.2   | 2.22E-150 | 6 FAM83B     |
| 6.61E-139 | 0.608378287 | 0.869 | 0.538 | 2.12E-134 | 6 AC138409.2 |
| 7.05E-128 | 0.607410785 | 0.27  | 0.074 | 2.26E-123 | 6 KCNMA1     |
| 1.19E-146 | 0.605065214 | 0.437 | 0.152 | 3.82E-142 | 6 U91319.1   |
| 1.51E-143 | 0.603126042 | 0.75  | 0.38  | 4.84E-139 | 6 ACSS3      |
| 3.74E-107 | 0.602428419 | 0.36  | 0.134 | 1.20E-102 | 6 DNAJC6     |
| 5.28E-113 | 0.599205438 | 0.798 | 0.465 | 1.69E-108 | 6 GALNT18    |
| 2.64E-141 | 0.598954996 | 0.395 | 0.132 | 8.49E-137 | 6 AC097515.1 |
| 1.19E-73  | 0.598676055 | 0.44  | 0.215 | 3.83E-69  | 6 MTHFD2L    |
| 0         | 0.597442858 | 0.288 | 0.017 | 0         | 6 CABP1      |
| 6.79E-180 | 0.597343966 | 0.454 | 0.146 | 2.18E-175 | 6 KCNK1      |
| 1.03E-111 | 0.597186508 | 0.986 | 0.876 | 3.31E-107 | 6 WWOX       |
| 4.80E-181 | 0.595426579 | 0.603 | 0.234 | 1.54E-176 | 6 AC018730.1 |
| 3.00E-143 | 0.594944417 | 0.523 | 0.213 | 9.62E-139 | 6 MAMDC2-AS1 |
| 2.64E-114 | 0.594933508 | 0.446 | 0.183 | 8.48E-110 | 6 PRANCR     |
| 5.18E-205 | 0.59477346  | 0.526 | 0.178 | 1.66E-200 | 6 RAP2C      |
| 1.85E-202 | 0.593928748 | 0.447 | 0.129 | 5.95E-198 | 6 GMPR       |
| 8.92E-118 | 0.592934994 | 0.675 | 0.359 | 2.86E-113 | 6 ARHGAP26   |
| 1.66E-140 | 0.592648144 | 0.533 | 0.224 | 5.32E-136 | 6 OCLN       |
| 2.15E-107 | 0.591110807 | 0.738 | 0.423 | 6.91E-103 | 6 RASSF8     |
| 3.64E-119 | 0.590270499 | 0.745 | 0.417 | 1.17E-114 | 6 CMTM4      |
| 2.81E-121 | 0.589675086 | 0.941 | 0.682 | 9.03E-117 | 6 GUSBP1     |
| 6.97E-104 | 0.587689183 | 0.63  | 0.332 | 2.24E-99  | 6 DSE        |
| 7.38E-139 | 0.587008906 | 0.764 | 0.418 | 2.37E-134 | 6 GUSBP16    |
| 3.24E-163 | 0.582927163 | 0.78  | 0.374 | 1.04E-158 | 6 DNMT3      |
| 9.05E-127 | 0.582497078 | 0.566 | 0.242 | 2.91E-122 | 6 SYT1       |
| 3.02E-97  | 0.581946616 | 0.25  | 0.078 | 9.69E-93  | 6 AC005699.1 |
| 9.30E-147 | 0.581692766 | 0.362 | 0.109 | 2.99E-142 | 6 SFRP1      |
| 3.63E-106 | 0.581286484 | 0.323 | 0.113 | 1.17E-101 | 6 ACTN1      |
| 3.97E-77  | 0.580791464 | 0.665 | 0.397 | 1.27E-72  | 6 ASTN2      |
| 3.11E-187 | 0.579884359 | 0.274 | 0.057 | 9.98E-183 | 6 TG         |
| 2.19E-123 | 0.578505663 | 0.579 | 0.272 | 7.04E-119 | 6 SLC25A33   |
| 1.14E-144 | 0.578059581 | 0.99  | 0.83  | 3.65E-140 | 6 LRBA       |
| 1.77E-112 | 0.57637319  | 0.976 | 0.761 | 5.69E-108 | 6 FARP1      |
| 1.14E-108 | 0.575418677 | 0.704 | 0.388 | 3.67E-104 | 6 MAGED1     |
| 8.82E-126 | 0.572625862 | 0.502 | 0.206 | 2.83E-121 | 6 SLC22A2    |
| 3.74E-129 | 0.572583937 | 0.596 | 0.273 | 1.20E-124 | 6 LINC00476  |
| 8.08E-224 | 0.571410031 | 0.457 | 0.128 | 2.60E-219 | 6 RRAGD      |
| 1.04E-110 | 0.570705456 | 0.393 | 0.149 | 3.34E-106 | 6 PAPSS2     |
| 1.35E-99  | 0.569149445 | 0.818 | 0.509 | 4.33E-95  | 6 GRAMD2B    |
| 0         | 0.568785558 | 0.332 | 0.046 | 0         | 6 AP000695.2 |
| 3.58E-142 | 0.567678615 | 0.762 | 0.412 | 1.15E-137 | 6 CDH12      |

|           |             |       |       |           |                |
|-----------|-------------|-------|-------|-----------|----------------|
| 2.58E-146 | 0.566173491 | 0.825 | 0.42  | 8.30E-142 | 6 PRDM16       |
| 4.92E-127 | 0.563614753 | 0.504 | 0.212 | 1.58E-122 | 6 RAP1GAP      |
| 4.23E-63  | 0.562120249 | 0.46  | 0.247 | 1.36E-58  | 6 RUNX1        |
| 9.52E-189 | 0.560841699 | 0.458 | 0.143 | 3.06E-184 | 6 CCDC148-AS1  |
| 0         | 0.559081362 | 0.311 | 0.035 | 0         | 6 SLC4A8       |
| 4.29E-113 | 0.559046041 | 0.725 | 0.399 | 1.38E-108 | 6 MPDZ         |
| 1.53E-81  | 0.558995965 | 0.662 | 0.388 | 4.93E-77  | 6 ELL2         |
| 9.55E-111 | 0.5572733   | 0.772 | 0.446 | 3.07E-106 | 6 ZFAND5       |
| 9.43E-122 | 0.555859132 | 0.538 | 0.235 | 3.03E-117 | 6 MYLK         |
| 1.38E-143 | 0.555680769 | 0.742 | 0.378 | 4.42E-139 | 6 GNAS         |
| 1.18E-173 | 0.55548453  | 0.559 | 0.215 | 3.78E-169 | 6 OVOL2        |
| 4.43E-128 | 0.554896988 | 0.883 | 0.553 | 1.42E-123 | 6 CFLAR        |
| 1.03E-93  | 0.554439524 | 0.705 | 0.406 | 3.31E-89  | 6 TMEM232      |
| 5.86E-99  | 0.553668794 | 0.798 | 0.498 | 1.88E-94  | 6 BCKDHB       |
| 1.29E-103 | 0.551664167 | 0.556 | 0.273 | 4.14E-99  | 6 TMEM164      |
| 2.20E-123 | 0.550540775 | 0.995 | 0.888 | 7.07E-119 | 6 RORA         |
| 4.05E-163 | 0.550323596 | 0.264 | 0.061 | 1.30E-158 | 6 CDH18        |
| 5.48E-173 | 0.550316202 | 0.571 | 0.217 | 1.76E-168 | 6 AL137009.1   |
| 4.55E-106 | 0.550232034 | 0.577 | 0.286 | 1.46E-101 | 6 MAILR        |
| 5.73E-97  | 0.54952189  | 0.412 | 0.174 | 1.84E-92  | 6 KCNS3        |
| 2.01E-132 | 0.54842134  | 0.598 | 0.274 | 6.45E-128 | 6 LDHB         |
| 1.89E-106 | 0.546955117 | 0.787 | 0.455 | 6.08E-102 | 6 COBL         |
| 5.68E-93  | 0.543974331 | 0.531 | 0.263 | 1.83E-88  | 6 PFKP         |
| 2.55E-117 | 0.543467079 | 0.702 | 0.353 | 8.19E-113 | 6 ARNT2        |
| 7.30E-157 | 0.542751623 | 0.621 | 0.268 | 2.34E-152 | 6 MSANTD2      |
| 2.79E-84  | 0.542591444 | 0.704 | 0.415 | 8.96E-80  | 6 CPEB2        |
| 7.38E-101 | 0.541877397 | 0.4   | 0.159 | 2.37E-96  | 6 SHISA9       |
| 1.12E-117 | 0.541708047 | 0.79  | 0.454 | 3.58E-113 | 6 CLINT1       |
| 4.84E-88  | 0.541230038 | 0.806 | 0.513 | 1.55E-83  | 6 PTPN14       |
| 1.12E-211 | 0.540644475 | 0.478 | 0.144 | 3.61E-207 | 6 SLC6A16      |
| 9.65E-155 | 0.539624032 | 0.796 | 0.384 | 3.10E-150 | 6 CLCNKA       |
| 8.33E-124 | 0.538717562 | 0.938 | 0.643 | 2.67E-119 | 6 APP          |
| 0         | 0.53609339  | 0.273 | 0.02  | 0         | 6 C14orf132    |
| 3.60E-154 | 0.536023172 | 0.567 | 0.234 | 1.16E-149 | 6 AC083843.2   |
| 9.19E-210 | 0.533148244 | 0.409 | 0.106 | 2.95E-205 | 6 SLC22A3      |
| 6.77E-90  | 0.533114792 | 0.897 | 0.574 | 2.17E-85  | 6 PDE7B        |
| 1.76E-112 | 0.531127237 | 0.612 | 0.302 | 5.66E-108 | 6 RPS6KA6      |
| 1.37E-113 | 0.530443925 | 0.682 | 0.36  | 4.40E-109 | 6 AKAP6        |
| 5.22E-128 | 0.528651119 | 0.494 | 0.202 | 1.68E-123 | 6 TPST2        |
| 6.35E-172 | 0.527782678 | 0.422 | 0.133 | 2.04E-167 | 6 LINC02340    |
| 3.42E-130 | 0.527700665 | 0.711 | 0.346 | 1.10E-125 | 6 GRHL2        |
| 2.72E-141 | 0.527319935 | 0.264 | 0.067 | 8.74E-137 | 6 LAMB4        |
| 3.65E-106 | 0.524345005 | 0.649 | 0.347 | 1.17E-101 | 6 NOTCH2       |
| 1.63E-64  | 0.523585169 | 0.593 | 0.352 | 5.23E-60  | 6 IFRD1        |
| 6.42E-195 | 0.523549727 | 0.556 | 0.183 | 2.06E-190 | 6 KNG1         |
| 1.04E-151 | 0.523548728 | 0.464 | 0.167 | 3.35E-147 | 6 C21orf62-AS1 |
| 1.78E-138 | 0.520827232 | 0.647 | 0.304 | 5.71E-134 | 6 CTIF         |
| 8.78E-157 | 0.518398637 | 0.311 | 0.081 | 2.82E-152 | 6 DOK5         |
| 0         | 0.517846379 | 0.277 | 0.027 | 0         | 6 MRAP2        |
| 5.61E-105 | 0.516917027 | 0.358 | 0.136 | 1.80E-100 | 6 ADCY5        |
| 4.32E-88  | 0.515532863 | 0.692 | 0.407 | 1.39E-83  | 6 ERICH1       |



|           |             |       |       |           |               |
|-----------|-------------|-------|-------|-----------|---------------|
| 1.16E-121 | 0.515286845 | 0.615 | 0.279 | 3.74E-117 | 6 ZNF385B     |
| 2.95E-163 | 0.514545764 | 0.362 | 0.103 | 9.46E-159 | 6 AL355499.1  |
| 4.25E-157 | 0.513807012 | 0.371 | 0.109 | 1.37E-152 | 6 LYPD6B      |
| 2.27E-112 | 0.512417496 | 0.667 | 0.347 | 7.30E-108 | 6 ANXA11      |
| 1.83E-271 | 0.50959182  | 0.285 | 0.044 | 5.87E-267 | 6 PKNOX2      |
| 2.31E-73  | 0.509088095 | 0.63  | 0.371 | 7.41E-69  | 6 RAP2C-AS1   |
| 2.16E-103 | 0.507808749 | 0.92  | 0.622 | 6.94E-99  | 6 USP25       |
| 1.09E-98  | 0.507156128 | 0.837 | 0.53  | 3.48E-94  | 6 AC093752.1  |
| 1.68E-224 | 0.505803556 | 0.612 | 0.201 | 5.41E-220 | 6 MEF2C       |
| 3.19E-136 | 0.504828184 | 0.6   | 0.274 | 1.02E-131 | 6 ADHFE1      |
| 1.63E-83  | 0.502635855 | 0.554 | 0.29  | 5.24E-79  | 6 AC021231.1  |
| 6.23E-64  | 0.502131647 | 0.546 | 0.31  | 2.00E-59  | 6 AC104123.1  |
| 4.66E-75  | 0.501132049 | 0.696 | 0.421 | 1.50E-70  | 6 SUCLG2-AS1  |
| 3.25E-106 | 0.501025855 | 0.635 | 0.327 | 1.04E-101 | 6 AC053527.2  |
| 4.29E-78  | 0.500590466 | 0.845 | 0.579 | 1.38E-73  | 6 LYPLAL1     |
| 2.78E-95  | 0.500211215 | 0.873 | 0.581 | 8.92E-91  | 6 WWC2        |
| 6.96E-65  | 0.500193708 | 0.495 | 0.262 | 2.24E-60  | 6 NRG1        |
| 2.69E-72  | 0.499814388 | 0.717 | 0.457 | 8.63E-68  | 6 ZMYND8      |
| 1.89E-66  | 0.499625548 | 0.514 | 0.282 | 6.05E-62  | 6 PBX3        |
| 3.91E-91  | 0.495675262 | 0.895 | 0.596 | 1.26E-86  | 6 KLF12       |
| 9.37E-95  | 0.494473185 | 0.647 | 0.355 | 3.01E-90  | 6 CMC1        |
| 2.74E-74  | 0.494047254 | 0.899 | 0.619 | 8.80E-70  | 6 THRB        |
| 2.18E-65  | 0.493943364 | 0.913 | 0.648 | 7.00E-61  | 6 MAST4       |
| 1.63E-62  | 0.493153017 | 0.607 | 0.355 | 5.25E-58  | 6 DGKH        |
| 3.39E-94  | 0.492984096 | 0.73  | 0.415 | 1.09E-89  | 6 COL4A2      |
| 3.40E-130 | 0.492342132 | 0.634 | 0.301 | 1.09E-125 | 6 Z98752.3    |
| 5.08E-105 | 0.491970043 | 0.98  | 0.702 | 1.63E-100 | 6 ADAMTS9-AS2 |
| 0         | 0.491896583 | 0.292 | 0.017 | 0         | 6 IRX2        |
| 5.86E-127 | 0.49135614  | 0.312 | 0.097 | 1.88E-122 | 6 AC124947.1  |
| 3.99E-94  | 0.489466244 | 0.617 | 0.318 | 1.28E-89  | 6 AC040174.1  |
| 3.46E-118 | 0.489121774 | 0.452 | 0.178 | 1.11E-113 | 6 NR2F1-AS1   |
| 1.19E-178 | 0.487001411 | 0.397 | 0.113 | 3.81E-174 | 6 USP13       |
| 1.24E-160 | 0.486999366 | 0.433 | 0.144 | 3.97E-156 | 6 KCNAB1      |
| 1.65E-134 | 0.486862617 | 0.796 | 0.411 | 5.30E-130 | 6 SCNN1A      |
| 1.92E-88  | 0.484835243 | 0.742 | 0.454 | 6.16E-84  | 6 CASK        |
| 1.66E-100 | 0.484719049 | 0.76  | 0.433 | 5.33E-96  | 6 NNT         |
| 1.09E-113 | 0.483345969 | 0.853 | 0.489 | 3.51E-109 | 6 TANC2       |
| 1.27E-84  | 0.482796455 | 0.379 | 0.163 | 4.08E-80  | 6 AC138627.1  |
| 4.31E-93  | 0.48217177  | 0.951 | 0.669 | 1.39E-88  | 6 ABLIM1      |
| 3.92E-119 | 0.482123645 | 0.624 | 0.288 | 1.26E-114 | 6 NR3C1       |
| 9.91E-85  | 0.481343724 | 0.896 | 0.622 | 3.18E-80  | 6 MBNL2       |
| 8.03E-115 | 0.480878616 | 0.594 | 0.278 | 2.58E-110 | 6 SH3BP4      |
| 9.34E-153 | 0.480732    | 0.413 | 0.138 | 3.00E-148 | 6 AL137058.2  |
| 6.04E-145 | 0.480410733 | 0.496 | 0.191 | 1.94E-140 | 6 MST1P2      |
| 8.97E-163 | 0.479361186 | 0.507 | 0.18  | 2.88E-158 | 6 SLC15A2     |
| 1.34E-119 | 0.478793795 | 0.666 | 0.344 | 4.29E-115 | 6 GUSBP17     |
| 5.84E-93  | 0.478392683 | 0.701 | 0.398 | 1.88E-88  | 6 WARS2-AS1   |
| 1.26E-165 | 0.476709634 | 0.394 | 0.116 | 4.05E-161 | 6 IFIT5       |
| 2.21E-116 | 0.476642777 | 0.6   | 0.278 | 7.11E-112 | 6 SNX10       |
| 9.24E-118 | 0.474891836 | 0.683 | 0.352 | 2.97E-113 | 6 CFAP70      |
| 2.26E-253 | 0.474877341 | 0.368 | 0.076 | 7.25E-249 | 6 AC007325.2  |

|           |             |       |       |           |              |
|-----------|-------------|-------|-------|-----------|--------------|
| 2.30E-250 | 0.473038934 | 0.296 | 0.052 | 7.38E-246 | 6 TMEM171    |
| 8.10E-104 | 0.472940391 | 0.362 | 0.136 | 2.60E-99  | 6 KCNH1      |
| 4.21E-108 | 0.471537212 | 0.709 | 0.394 | 1.35E-103 | 6 NBPf26     |
| 6.41E-90  | 0.470477999 | 0.708 | 0.417 | 2.06E-85  | 6 ATP2C1     |
| 1.96E-99  | 0.470245231 | 0.802 | 0.466 | 6.30E-95  | 6 GNG12-AS1  |
| 7.40E-60  | 0.470226939 | 0.583 | 0.343 | 2.38E-55  | 6 RNLS       |
| 1.69E-86  | 0.469144371 | 0.515 | 0.259 | 5.44E-82  | 6 EPM2A      |
| 2.41E-105 | 0.468579691 | 0.835 | 0.514 | 7.74E-101 | 6 TRA2A      |
| 1.72E-75  | 0.468190233 | 0.854 | 0.585 | 5.53E-71  | 6 CTBP2      |
| 1.88E-105 | 0.467730822 | 0.438 | 0.183 | 6.02E-101 | 6 CIT        |
| 3.11E-145 | 0.466609593 | 0.526 | 0.211 | 9.98E-141 | 6 BDH1       |
| 3.65E-87  | 0.465796532 | 0.789 | 0.499 | 1.17E-82  | 6 MIR29B2CHG |
| 5.24E-124 | 0.465411478 | 0.621 | 0.304 | 1.68E-119 | 6 GUSBP13    |
| 2.06E-103 | 0.464619243 | 0.897 | 0.533 | 6.60E-99  | 6 ZBTB16     |
| 6.39E-61  | 0.464356269 | 0.353 | 0.163 | 2.05E-56  | 6 TIPARP     |
| 9.38E-54  | 0.463398366 | 0.629 | 0.402 | 3.01E-49  | 6 AL355499.2 |
| 1.24E-117 | 0.463034347 | 0.633 | 0.31  | 3.99E-113 | 6 PITPNM2    |
| 9.67E-104 | 0.462860709 | 0.288 | 0.092 | 3.11E-99  | 6 PPM1E      |
| 1.38E-78  | 0.462290008 | 0.931 | 0.668 | 4.42E-74  | 6 TFCP2L1    |
| 2.46E-126 | 0.462210599 | 0.371 | 0.129 | 7.91E-122 | 6 SMCO4      |
| 2.88E-110 | 0.462102703 | 0.472 | 0.2   | 9.25E-106 | 6 C12orf40   |
| 1.23E-110 | 0.462034223 | 0.435 | 0.178 | 3.96E-106 | 6 MEF2C-AS1  |
| 4.40E-145 | 0.462024984 | 0.413 | 0.135 | 1.41E-140 | 6 GAD1       |
| 2.51E-96  | 0.461837454 | 0.739 | 0.43  | 8.06E-92  | 6 PREPL      |
| 1.08E-78  | 0.461115229 | 0.558 | 0.302 | 3.46E-74  | 6 FSIP2      |
| 2.61E-204 | 0.460879081 | 0.291 | 0.059 | 8.38E-200 | 6 PBX4       |
| 5.31E-98  | 0.459177444 | 0.784 | 0.463 | 1.70E-93  | 6 SLC25A12   |
| 7.14E-98  | 0.458621967 | 0.756 | 0.447 | 2.29E-93  | 6 GPATCH2L   |
| 6.16E-67  | 0.456214866 | 0.52  | 0.281 | 1.98E-62  | 6 CYP7B1     |
| 3.87E-70  | 0.456053295 | 0.423 | 0.207 | 1.24E-65  | 6 SOX2-OT    |
| 1.72E-126 | 0.45532892  | 0.437 | 0.165 | 5.53E-122 | 6 RPL34-DT   |
| 1.62E-79  | 0.455245105 | 0.78  | 0.476 | 5.20E-75  | 6 MFHAS1     |
| 3.20E-135 | 0.455008134 | 0.47  | 0.181 | 1.03E-130 | 6 WLS        |
| 7.03E-74  | 0.452921649 | 0.621 | 0.351 | 2.26E-69  | 6 MDM2       |
| 4.41E-75  | 0.451325361 | 0.849 | 0.559 | 1.42E-70  | 6 FAM160A1   |
| 6.59E-82  | 0.450370857 | 0.764 | 0.471 | 2.12E-77  | 6 MTX2       |
| 3.59E-75  | 0.450146984 | 0.615 | 0.366 | 1.15E-70  | 6 SEC14L1    |
| 8.15E-98  | 0.45010264  | 0.649 | 0.35  | 2.62E-93  | 6 RIC8B      |
| 1.22E-173 | 0.450073767 | 0.533 | 0.186 | 3.92E-169 | 6 USP2       |
| 3.36E-123 | 0.449467928 | 0.561 | 0.256 | 1.08E-118 | 6 XPA        |
| 7.30E-139 | 0.449138842 | 0.915 | 0.562 | 2.34E-134 | 6 AL359736.1 |
| 5.18E-106 | 0.448021271 | 0.885 | 0.517 | 1.66E-101 | 6 MYO10      |
| 1.04E-117 | 0.446728657 | 0.669 | 0.342 | 3.35E-113 | 6 NAIP       |
| 6.23E-97  | 0.446669428 | 0.752 | 0.45  | 2.00E-92  | 6 GUSBP2     |
| 1.36E-79  | 0.446401745 | 0.581 | 0.308 | 4.37E-75  | 6 FGFR2      |
| 1.77E-136 | 0.44579672  | 0.323 | 0.096 | 5.69E-132 | 6 USP2-AS1   |
| 1.29E-135 | 0.445759856 | 0.413 | 0.149 | 4.15E-131 | 6 SSR3       |
| 2.23E-100 | 0.445723877 | 0.429 | 0.177 | 7.15E-96  | 6 PLXNA2     |
| 2.21E-87  | 0.44543889  | 0.506 | 0.251 | 7.09E-83  | 6 IMPA2      |
| 9.65E-102 | 0.444272497 | 0.649 | 0.346 | 3.10E-97  | 6 DECR1      |
| 2.10E-129 | 0.444265082 | 0.545 | 0.24  | 6.74E-125 | 6 CROCCP2    |

|           |             |       |       |           |                |
|-----------|-------------|-------|-------|-----------|----------------|
| 3.68E-102 | 0.443705978 | 0.561 | 0.274 | 1.18E-97  | 6 COX10        |
| 5.30E-108 | 0.442854681 | 0.679 | 0.349 | 1.70E-103 | 6 CAPN2        |
| 4.83E-70  | 0.442691903 | 0.308 | 0.129 | 1.55E-65  | 6 NDST3        |
| 9.01E-139 | 0.441666173 | 0.414 | 0.147 | 2.89E-134 | 6 LINC00958    |
| 1.14E-193 | 0.44109047  | 0.367 | 0.096 | 3.67E-189 | 6 DNAJC19      |
| 7.24E-111 | 0.440904171 | 0.659 | 0.334 | 2.32E-106 | 6 GABPB1-AS1   |
| 3.50E-80  | 0.440223189 | 0.333 | 0.134 | 1.13E-75  | 6 BRINP3       |
| 2.40E-114 | 0.439938545 | 0.698 | 0.359 | 7.70E-110 | 6 MAMDC2       |
| 2.12E-64  | 0.437757502 | 0.679 | 0.42  | 6.81E-60  | 6 C1QTNF3-AMAC |
| 9.00E-37  | 0.437559326 | 0.409 | 0.249 | 2.89E-32  | 6 XIST         |
| 6.60E-111 | 0.436052145 | 0.613 | 0.296 | 2.12E-106 | 6 MICU3        |
| 6.41E-126 | 0.435853343 | 0.417 | 0.149 | 2.06E-121 | 6 IRS1         |
| 9.99E-274 | 0.435578121 | 0.353 | 0.065 | 3.21E-269 | 6 PP7080       |
| 2.65E-56  | 0.435100969 | 0.55  | 0.327 | 8.52E-52  | 6 ZRANB2-AS2   |
| 7.56E-79  | 0.434910581 | 0.701 | 0.423 | 2.43E-74  | 6 RAP1A        |
| 5.54E-104 | 0.43434572  | 0.519 | 0.246 | 1.78E-99  | 6 NBN          |
| 7.18E-156 | 0.432803217 | 0.357 | 0.104 | 2.31E-151 | 6 LINC01948    |
| 1.53E-76  | 0.432378162 | 0.825 | 0.559 | 4.90E-72  | 6 LUC7L2       |
| 8.91E-157 | 0.431996274 | 0.411 | 0.135 | 2.86E-152 | 6 SIAE         |
| 2.66E-101 | 0.431818274 | 0.718 | 0.368 | 8.53E-97  | 6 SIM1         |
| 4.40E-50  | 0.431459581 | 0.383 | 0.207 | 1.41E-45  | 6 INPP5F       |
| 2.03E-90  | 0.431159791 | 0.762 | 0.451 | 6.54E-86  | 6 PIAS2        |
| 8.53E-128 | 0.431101874 | 0.431 | 0.164 | 2.74E-123 | 6 SMC5-AS1     |
| 1.47E-96  | 0.43069268  | 0.292 | 0.099 | 4.72E-92  | 6 GRIK2        |
| 5.70E-120 | 0.430361276 | 0.368 | 0.128 | 1.83E-115 | 6 MTCL1        |
| 8.24E-62  | 0.430333022 | 0.893 | 0.659 | 2.65E-57  | 6 PTGER3       |
| 2.21E-96  | 0.429294892 | 0.509 | 0.24  | 7.09E-92  | 6 SGCE         |
| 8.79E-83  | 0.428296526 | 0.475 | 0.235 | 2.82E-78  | 6 MERTK        |
| 1.07E-170 | 0.427717329 | 0.284 | 0.065 | 3.44E-166 | 6 JAM2         |
| 1.17E-105 | 0.426266554 | 0.501 | 0.222 | 3.75E-101 | 6 B3GLCT       |
| 1.34E-95  | 0.425625627 | 0.78  | 0.45  | 4.32E-91  | 6 FLNB         |
| 5.36E-243 | 0.424836123 | 0.268 | 0.044 | 1.72E-238 | 6 CSRP2        |
| 7.05E-104 | 0.424311219 | 0.446 | 0.19  | 2.26E-99  | 6 GOLM1        |
| 8.49E-91  | 0.423432036 | 0.748 | 0.441 | 2.73E-86  | 6 C2CD5        |
| 3.72E-137 | 0.423422581 | 0.358 | 0.115 | 1.20E-132 | 6 MFAP3L       |
| 2.21E-88  | 0.423059961 | 0.486 | 0.233 | 7.09E-84  | 6 ATP6AP1L     |
| 2.86E-113 | 0.422294414 | 0.424 | 0.171 | 9.18E-109 | 6 ITGB1BP1     |
| 3.55E-90  | 0.421503195 | 0.748 | 0.444 | 1.14E-85  | 6 NBPF19       |
| 9.02E-108 | 0.42118065  | 0.544 | 0.255 | 2.90E-103 | 6 GSTO2        |
| 3.50E-90  | 0.419498076 | 0.555 | 0.29  | 1.12E-85  | 6 THUMPD3-AS1  |
| 3.81E-75  | 0.419403174 | 0.761 | 0.475 | 1.22E-70  | 6 FAM135A      |
| 1.42E-87  | 0.418836568 | 0.77  | 0.47  | 4.55E-83  | 6 FXR1         |
| 1.31E-31  | 0.41759577  | 0.471 | 0.303 | 4.22E-27  | 6 P4HA1        |
| 2.68E-48  | 0.416688909 | 0.84  | 0.62  | 8.62E-44  | 6 CAMKMT       |
| 6.54E-71  | 0.416670444 | 0.933 | 0.692 | 2.10E-66  | 6 VWAA8        |
| 2.88E-53  | 0.416423472 | 0.562 | 0.343 | 9.25E-49  | 6 AASS         |
| 6.11E-98  | 0.416274754 | 0.487 | 0.227 | 1.96E-93  | 6 TTC7A        |
| 6.91E-47  | 0.416146861 | 0.39  | 0.211 | 2.22E-42  | 6 NLGN4Y       |
| 9.78E-78  | 0.414015842 | 0.42  | 0.195 | 3.14E-73  | 6 LEKR1        |
| 3.80E-46  | 0.412924528 | 0.615 | 0.396 | 1.22E-41  | 6 DPH6-DT      |
| 9.65E-87  | 0.412709772 | 0.445 | 0.204 | 3.10E-82  | 6 SMS          |

|           |             |       |       |           |              |
|-----------|-------------|-------|-------|-----------|--------------|
| 1.15E-188 | 0.410946026 | 0.254 | 0.049 | 3.68E-184 | 6 LPL        |
| 1.06E-166 | 0.409735397 | 0.308 | 0.076 | 3.40E-162 | 6 AC016526.1 |
| 3.19E-125 | 0.409272327 | 0.497 | 0.199 | 1.02E-120 | 6 HOXA3      |
| 4.90E-112 | 0.408715999 | 0.421 | 0.174 | 1.57E-107 | 6 TBRG1      |
| 3.53E-95  | 0.405822493 | 0.498 | 0.237 | 1.13E-90  | 6 MIOS       |
| 5.35E-78  | 0.405412532 | 0.596 | 0.329 | 1.72E-73  | 6 ACCL3      |
| 5.60E-90  | 0.404907236 | 0.724 | 0.43  | 1.80E-85  | 6 AC132008.2 |
| 1.26E-90  | 0.404617076 | 0.542 | 0.273 | 4.05E-86  | 6 MYEF2      |
| 1.54E-67  | 0.4045016   | 0.49  | 0.259 | 4.93E-63  | 6 AC092535.4 |
| 5.50E-30  | 0.403400668 | 0.694 | 0.515 | 1.77E-25  | 6 ST7        |
| 2.37E-142 | 0.402942504 | 0.32  | 0.093 | 7.61E-138 | 6 FECH       |
| 7.15E-69  | 0.402373021 | 0.89  | 0.62  | 2.30E-64  | 6 CLMN       |
| 3.81E-65  | 0.402036176 | 0.784 | 0.518 | 1.22E-60  | 6 KIF16B     |
| 3.90E-100 | 0.40120358  | 0.539 | 0.263 | 1.25E-95  | 6 GUSBP3     |
| 1.60E-75  | 0.401161064 | 0.721 | 0.435 | 5.13E-71  | 6 NFYC       |
| 7.08E-97  | 0.40020357  | 0.526 | 0.256 | 2.28E-92  | 6 DTWD1      |
| 1.11E-106 | 0.399893613 | 0.415 | 0.167 | 3.58E-102 | 6 ESRP1      |
| 7.70E-85  | 0.398907266 | 0.726 | 0.398 | 2.47E-80  | 6 FAM171A1   |
| 5.16E-125 | 0.398227927 | 0.543 | 0.23  | 1.66E-120 | 6 AC012531.3 |
| 7.08E-119 | 0.397997621 | 0.252 | 0.068 | 2.27E-114 | 6 DCLK1      |
| 2.72E-46  | 0.397884939 | 0.794 | 0.568 | 8.73E-42  | 6 SUPT3H     |
| 1.08E-69  | 0.395623956 | 0.758 | 0.486 | 3.48E-65  | 6 PSME4      |
| 6.61E-93  | 0.395516843 | 0.379 | 0.151 | 2.12E-88  | 6 IL15       |
| 5.99E-72  | 0.394315563 | 0.758 | 0.468 | 1.92E-67  | 6 USP45      |
| 6.10E-110 | 0.394033904 | 0.51  | 0.224 | 1.96E-105 | 6 IDH2       |
| 2.30E-66  | 0.393768529 | 0.7   | 0.433 | 7.38E-62  | 6 ATG10      |
| 4.02E-49  | 0.393341612 | 0.421 | 0.23  | 1.29E-44  | 6 LINC01036  |
| 1.11E-68  | 0.393078328 | 0.644 | 0.384 | 3.57E-64  | 6 LNPEP      |
| 2.35E-132 | 0.392305849 | 0.822 | 0.45  | 7.54E-128 | 6 ARHGAP18   |
| 3.13E-67  | 0.391315911 | 0.833 | 0.539 | 1.00E-62  | 6 STARD13    |
| 2.46E-83  | 0.390380993 | 0.577 | 0.306 | 7.91E-79  | 6 TMEM161B   |
| 3.18E-78  | 0.3903318   | 0.574 | 0.314 | 1.02E-73  | 6 HSD17B4    |
| 1.43E-111 | 0.389251809 | 0.753 | 0.402 | 4.58E-107 | 6 TBC1D8     |
| 1.58E-70  | 0.38880805  | 0.297 | 0.123 | 5.08E-66  | 6 ATRNL1     |
| 2.24E-42  | 0.388395861 | 0.824 | 0.622 | 7.20E-38  | 6 LRCH1      |
| 2.09E-97  | 0.38763426  | 0.349 | 0.131 | 6.72E-93  | 6 SLC16A5    |
| 1.23E-63  | 0.386882053 | 0.562 | 0.327 | 3.96E-59  | 6 RYBP       |
| 1.78E-54  | 0.386450924 | 0.885 | 0.654 | 5.72E-50  | 6 RASA1      |
| 3.65E-80  | 0.386084496 | 0.598 | 0.335 | 1.17E-75  | 6 ATP5F1C    |
| 2.06E-109 | 0.386075483 | 0.534 | 0.244 | 6.62E-105 | 6 AC073283.3 |
| 1.70E-78  | 0.385066017 | 0.736 | 0.445 | 5.45E-74  | 6 CCDC50     |
| 5.99E-65  | 0.385033802 | 0.81  | 0.529 | 1.92E-60  | 6 GBE1       |
| 1.82E-71  | 0.385028572 | 0.531 | 0.288 | 5.85E-67  | 6 PLA2G12A   |
| 9.33E-72  | 0.383313647 | 0.351 | 0.155 | 3.00E-67  | 6 PCDHA1     |
| 5.45E-78  | 0.383282517 | 0.456 | 0.217 | 1.75E-73  | 6 RNF24      |
| 7.43E-92  | 0.383163372 | 0.748 | 0.438 | 2.39E-87  | 6 SRSF10     |
| 8.58E-90  | 0.383158282 | 0.542 | 0.266 | 2.75E-85  | 6 SORL1      |
| 5.59E-58  | 0.382598492 | 0.648 | 0.412 | 1.79E-53  | 6 ATP2B1     |
| 8.68E-71  | 0.381695766 | 0.782 | 0.491 | 2.79E-66  | 6 ZHX3       |
| 3.75E-61  | 0.381641782 | 0.943 | 0.719 | 1.20E-56  | 6 DOCK1      |
| 3.66E-179 | 0.381528569 | 0.272 | 0.057 | 1.18E-174 | 6 LINC02437  |

|           |             |       |       |           |              |
|-----------|-------------|-------|-------|-----------|--------------|
| 9.88E-67  | 0.381276872 | 0.393 | 0.188 | 3.17E-62  | 6 LINC00882  |
| 7.24E-81  | 0.381264683 | 0.884 | 0.564 | 2.33E-76  | 6 VAV3       |
| 2.59E-58  | 0.38083889  | 0.327 | 0.149 | 8.33E-54  | 6 HDAC9      |
| 8.33E-65  | 0.379795372 | 0.785 | 0.514 | 2.68E-60  | 6 AF117829.1 |
| 1.16E-73  | 0.379488239 | 0.753 | 0.467 | 3.73E-69  | 6 STRBP      |
| 1.39E-53  | 0.379357798 | 0.297 | 0.136 | 4.48E-49  | 6 AC093607.1 |
| 4.36E-125 | 0.379334239 | 0.705 | 0.355 | 1.40E-120 | 6 TGFB2      |
| 7.12E-57  | 0.379124424 | 0.395 | 0.198 | 2.29E-52  | 6 ROR1       |
| 2.98E-79  | 0.378983156 | 0.669 | 0.389 | 9.58E-75  | 6 MYSM1      |
| 6.34E-90  | 0.376646443 | 0.554 | 0.283 | 2.03E-85  | 6 ETFDH      |
| 1.30E-63  | 0.376317174 | 0.509 | 0.278 | 4.17E-59  | 6 DSTN       |
| 5.22E-32  | 0.374888385 | 0.309 | 0.175 | 1.68E-27  | 6 LINC01505  |
| 3.55E-148 | 0.374811477 | 0.286 | 0.073 | 1.14E-143 | 6 IL1RL2     |
| 4.01E-45  | 0.374744673 | 0.472 | 0.278 | 1.29E-40  | 6 SGMS2      |
| 2.63E-140 | 0.374275071 | 0.545 | 0.214 | 8.44E-136 | 6 UST        |
| 7.95E-121 | 0.371286509 | 0.304 | 0.093 | 2.55E-116 | 6 NAAA       |
| 9.20E-76  | 0.370112742 | 0.744 | 0.459 | 2.95E-71  | 6 DMTF1      |
| 1.94E-110 | 0.369344298 | 0.261 | 0.077 | 6.25E-106 | 6 S100A10    |
| 2.72E-75  | 0.368597388 | 0.803 | 0.479 | 8.75E-71  | 6 NOS1AP     |
| 2.10E-76  | 0.368569458 | 0.63  | 0.366 | 6.74E-72  | 6 UQCRC2     |
| 6.85E-87  | 0.368110382 | 0.473 | 0.222 | 2.20E-82  | 6 STK17A     |
| 4.24E-71  | 0.36742818  | 0.608 | 0.35  | 1.36E-66  | 6 CHKA       |
| 1.93E-54  | 0.367179139 | 0.444 | 0.24  | 6.19E-50  | 6 CASC2      |
| 2.50E-104 | 0.367120614 | 0.549 | 0.26  | 8.01E-100 | 6 NAIP4      |
| 1.54E-53  | 0.366594621 | 0.411 | 0.219 | 4.95E-49  | 6 AL359710.1 |
| 6.76E-77  | 0.366267257 | 0.989 | 0.819 | 2.17E-72  | 6 MSI2       |
| 4.43E-58  | 0.366010614 | 0.803 | 0.535 | 1.42E-53  | 6 DAPK1      |
| 2.45E-132 | 0.36594547  | 0.488 | 0.187 | 7.86E-128 | 6 TMEM72     |
| 3.44E-106 | 0.365548138 | 0.606 | 0.283 | 1.11E-101 | 6 PLEKHH2    |
| 4.73E-110 | 0.365431169 | 0.517 | 0.229 | 1.52E-105 | 6 PLIN5      |
| 3.16E-132 | 0.36528326  | 0.318 | 0.093 | 1.02E-127 | 6 EPHA4      |
| 1.88E-91  | 0.364558503 | 0.522 | 0.26  | 6.03E-87  | 6 AC138393.1 |
| 2.02E-101 | 0.36349836  | 0.358 | 0.134 | 6.48E-97  | 6 LINC00240  |
| 1.15E-58  | 0.363341929 | 0.495 | 0.279 | 3.70E-54  | 6 ANP32AP1   |
| 2.96E-74  | 0.363026319 | 0.482 | 0.244 | 9.51E-70  | 6 SDC4       |
| 3.15E-81  | 0.362743797 | 0.453 | 0.21  | 1.01E-76  | 6 SPAG17     |
| 1.70E-85  | 0.362719773 | 0.732 | 0.432 | 5.47E-81  | 6 TTC14      |
| 1.10E-64  | 0.36162722  | 0.575 | 0.327 | 3.53E-60  | 6 ASPH       |
| 5.74E-29  | 0.360458454 | 0.272 | 0.153 | 1.84E-24  | 6 EEPD1      |
| 2.51E-57  | 0.359698809 | 0.649 | 0.404 | 8.05E-53  | 6 LINC01362  |
| 1.58E-69  | 0.359443557 | 0.502 | 0.269 | 5.06E-65  | 6 LINC02241  |
| 1.94E-31  | 0.359376944 | 0.431 | 0.271 | 6.23E-27  | 6 KCTD8      |
| 2.87E-99  | 0.358924788 | 0.749 | 0.402 | 9.23E-95  | 6 KCNQ1      |
| 4.57E-57  | 0.357868794 | 0.86  | 0.608 | 1.47E-52  | 6 AUH        |
| 2.09E-58  | 0.357783082 | 0.477 | 0.266 | 6.70E-54  | 6 CDKL5      |
| 2.07E-158 | 0.357623494 | 0.301 | 0.078 | 6.65E-154 | 6 AC004982.2 |
| 3.45E-94  | 0.357581505 | 0.466 | 0.213 | 1.11E-89  | 6 GUSBP14    |
| 3.04E-86  | 0.356976618 | 0.474 | 0.224 | 9.75E-82  | 6 TNIP1      |
| 2.85E-88  | 0.356891164 | 0.442 | 0.199 | 9.16E-84  | 6 HPRT1      |
| 3.93E-75  | 0.356235365 | 0.7   | 0.415 | 1.26E-70  | 6 DNMI1L     |
| 2.60E-70  | 0.356084023 | 0.329 | 0.14  | 8.34E-66  | 6 SORCS2     |

|           |             |       |       |           |              |
|-----------|-------------|-------|-------|-----------|--------------|
| 2.48E-96  | 0.355547285 | 0.403 | 0.167 | 7.96E-92  | 6 LINC02062  |
| 9.09E-67  | 0.355121027 | 0.62  | 0.361 | 2.92E-62  | 6 SMIM8      |
| 2.75E-82  | 0.354666658 | 0.76  | 0.446 | 8.82E-78  | 6 TOM1L2     |
| 1.18E-101 | 0.354634754 | 0.544 | 0.245 | 3.79E-97  | 6 BTBD11     |
| 5.29E-57  | 0.354382009 | 0.804 | 0.555 | 1.70E-52  | 6 MARCHF6    |
| 1.93E-36  | 0.354122465 | 0.256 | 0.127 | 6.20E-32  | 6 AC012501.2 |
| 5.03E-82  | 0.354026569 | 0.41  | 0.185 | 1.62E-77  | 6 HACD2      |
| 5.55E-96  | 0.353470979 | 0.337 | 0.123 | 1.78E-91  | 6 AC092162.2 |
| 2.11E-66  | 0.352405265 | 0.658 | 0.398 | 6.79E-62  | 6 NDUFS4     |
| 5.37E-77  | 0.35085207  | 0.63  | 0.353 | 1.72E-72  | 6 ENSA       |
| 3.80E-64  | 0.350710704 | 0.799 | 0.524 | 1.22E-59  | 6 ZHX2       |
| 8.49E-61  | 0.349931958 | 0.362 | 0.174 | 2.73E-56  | 6 TES        |
| 1.49E-150 | 0.349610275 | 0.282 | 0.072 | 4.78E-146 | 6 SLC25A4    |
| 1.48E-60  | 0.348361355 | 0.503 | 0.283 | 4.74E-56  | 6 CMC2       |
| 8.35E-65  | 0.348293164 | 0.62  | 0.351 | 2.68E-60  | 6 NTN4       |
| 1.84E-109 | 0.348069276 | 0.286 | 0.089 | 5.92E-105 | 6 WEE1       |
| 4.86E-44  | 0.34774058  | 0.405 | 0.226 | 1.56E-39  | 6 TAFA2      |
| 2.68E-84  | 0.347728615 | 0.488 | 0.238 | 8.62E-80  | 6 AC244669.1 |
| 8.21E-69  | 0.347205736 | 0.429 | 0.211 | 2.64E-64  | 6 LRRC8B     |
| 1.49E-90  | 0.346997164 | 0.514 | 0.245 | 4.78E-86  | 6 ITPRID2    |
| 4.30E-58  | 0.345602458 | 0.603 | 0.37  | 1.38E-53  | 6 IMMP1L     |
| 1.02E-64  | 0.345326608 | 0.84  | 0.539 | 3.29E-60  | 6 TPST1      |
| 2.55E-48  | 0.34442766  | 0.937 | 0.72  | 8.18E-44  | 6 ANKRD17    |
| 5.63E-37  | 0.343795478 | 0.881 | 0.705 | 1.81E-32  | 6 MACROD2    |
| 1.91E-163 | 0.342139719 | 0.274 | 0.064 | 6.14E-159 | 6 CTBS       |
| 3.14E-50  | 0.342098525 | 0.931 | 0.705 | 1.01E-45  | 6 MKLN1      |
| 4.56E-66  | 0.341856231 | 0.772 | 0.482 | 1.46E-61  | 6 CCDC18-AS1 |
| 7.98E-111 | 0.341440221 | 0.271 | 0.083 | 2.56E-106 | 6 SULT1C3    |
| 1.06E-60  | 0.341367373 | 0.361 | 0.17  | 3.41E-56  | 6 S100A6     |
| 3.89E-41  | 0.338072151 | 0.732 | 0.504 | 1.25E-36  | 6 MAN1A1     |
| 1.78E-52  | 0.337825674 | 0.82  | 0.565 | 5.71E-48  | 6 SPIN1      |
| 1.61E-79  | 0.337732967 | 0.62  | 0.329 | 5.16E-75  | 6 TMEM116    |
| 1.03E-91  | 0.33770926  | 0.655 | 0.34  | 3.31E-87  | 6 RAP1GAP2   |
| 6.30E-59  | 0.33702833  | 0.446 | 0.235 | 2.02E-54  | 6 CPVL       |
| 5.77E-82  | 0.336802211 | 0.335 | 0.134 | 1.85E-77  | 6 LIPH       |
| 8.98E-62  | 0.336447721 | 0.405 | 0.199 | 2.88E-57  | 6 AC104596.1 |
| 4.36E-39  | 0.336098629 | 0.667 | 0.455 | 1.40E-34  | 6 RFX3-AS1   |
| 5.63E-60  | 0.335958737 | 0.788 | 0.515 | 1.81E-55  | 6 TDRD3      |
| 1.68E-63  | 0.335653002 | 0.626 | 0.378 | 5.40E-59  | 6 CUL1       |
| 2.63E-95  | 0.335294875 | 0.312 | 0.112 | 8.44E-91  | 6 DEUP1      |
| 5.86E-91  | 0.334687363 | 0.358 | 0.143 | 1.88E-86  | 6 HOMER2     |
| 1.27E-88  | 0.33384862  | 0.598 | 0.305 | 4.09E-84  | 6 KLF9       |
| 5.88E-65  | 0.333429218 | 0.708 | 0.438 | 1.89E-60  | 6 ARMCX4     |
| 2.01E-50  | 0.333261635 | 0.445 | 0.249 | 6.46E-46  | 6 PRRG1      |
| 4.18E-75  | 0.332744463 | 0.638 | 0.361 | 1.34E-70  | 6 OIP5-AS1   |
| 6.10E-56  | 0.331700562 | 0.551 | 0.321 | 1.96E-51  | 6 AC046134.2 |
| 2.42E-70  | 0.331431152 | 0.619 | 0.355 | 7.77E-66  | 6 PNPLA8     |
| 5.69E-73  | 0.330807027 | 0.558 | 0.304 | 1.83E-68  | 6 RAB30-DT   |
| 2.60E-67  | 0.330625128 | 0.333 | 0.146 | 8.36E-63  | 6 SLCO4C1    |
| 2.26E-73  | 0.330406079 | 0.599 | 0.337 | 7.26E-69  | 6 ZNF493     |
| 2.47E-83  | 0.329776375 | 0.448 | 0.208 | 7.93E-79  | 6 AL132780.1 |

|           |             |       |       |           |               |
|-----------|-------------|-------|-------|-----------|---------------|
| 2.51E-140 | 0.329222027 | 0.31  | 0.086 | 8.08E-136 | 6 STARD8      |
| 7.73E-78  | 0.329221527 | 0.521 | 0.269 | 2.48E-73  | 6 LETMD1      |
| 6.08E-105 | 0.329179667 | 0.276 | 0.087 | 1.95E-100 | 6 IFTAP       |
| 4.68E-86  | 0.329174574 | 0.493 | 0.236 | 1.50E-81  | 6 DNHD1       |
| 6.42E-45  | 0.328625853 | 0.717 | 0.476 | 2.06E-40  | 6 SLC44A3-AS1 |
| 1.33E-32  | 0.327776583 | 0.603 | 0.418 | 4.27E-28  | 6 MYH9        |
| 1.66E-57  | 0.32759964  | 0.372 | 0.183 | 5.34E-53  | 6 ELOVL6      |
| 1.95E-64  | 0.326796234 | 0.741 | 0.464 | 6.27E-60  | 6 SNRK        |
| 6.11E-97  | 0.326739981 | 0.311 | 0.109 | 1.96E-92  | 6 MIR503HG    |
| 5.15E-52  | 0.325430015 | 0.337 | 0.167 | 1.65E-47  | 6 AC011346.1  |
| 2.50E-48  | 0.325339321 | 0.796 | 0.538 | 8.03E-44  | 6 RAB3IP      |
| 2.10E-65  | 0.325095159 | 0.443 | 0.23  | 6.74E-61  | 6 GTF2H2C     |
| 4.65E-61  | 0.325070687 | 0.752 | 0.473 | 1.49E-56  | 6 PRKAA2      |
| 4.37E-56  | 0.324331713 | 0.783 | 0.527 | 1.40E-51  | 6 KIAA0232    |
| 1.17E-60  | 0.323881355 | 0.495 | 0.271 | 3.75E-56  | 6 SORT1       |
| 1.03E-65  | 0.323727348 | 0.592 | 0.347 | 3.31E-61  | 6 LINC02256   |
| 2.30E-77  | 0.32352113  | 0.997 | 0.769 | 7.37E-73  | 6 MECOM       |
| 7.09E-80  | 0.322516251 | 0.429 | 0.19  | 2.28E-75  | 6 AQP4-AS1    |
| 3.20E-54  | 0.32149655  | 0.764 | 0.503 | 1.03E-49  | 6 TAOK3       |
| 1.20E-73  | 0.321309777 | 0.526 | 0.272 | 3.87E-69  | 6 FAM227B     |
| 3.16E-78  | 0.320523925 | 0.408 | 0.187 | 1.02E-73  | 6 DBT         |
| 7.31E-59  | 0.319964452 | 0.716 | 0.437 | 2.35E-54  | 6 PAQR5       |
| 1.08E-117 | 0.319403224 | 0.329 | 0.108 | 3.47E-113 | 6 PRXL2A      |
| 9.92E-69  | 0.319206376 | 0.429 | 0.212 | 3.19E-64  | 6 TXNRD1      |
| 2.47E-62  | 0.318742318 | 0.273 | 0.114 | 7.92E-58  | 6 MRPS30-DT   |
| 3.68E-233 | 0.318573392 | 0.716 | 0.272 | 1.18E-228 | 6 ALDH1A2     |
| 5.32E-82  | 0.318169411 | 0.373 | 0.162 | 1.71E-77  | 6 AC007637.1  |
| 6.34E-101 | 0.317928086 | 0.401 | 0.163 | 2.04E-96  | 6 GUSBP15     |
| 7.41E-42  | 0.317697221 | 0.44  | 0.261 | 2.38E-37  | 6 KAT2B       |
| 2.98E-39  | 0.316798794 | 0.945 | 0.762 | 9.57E-35  | 6 IGF1R       |
| 1.41E-48  | 0.316571291 | 0.754 | 0.499 | 4.53E-44  | 6 DENND1B     |
| 4.72E-56  | 0.316347763 | 0.691 | 0.436 | 1.52E-51  | 6 TFCP2       |
| 4.67E-66  | 0.316022932 | 0.401 | 0.187 | 1.50E-61  | 6 AC078980.1  |
| 2.80E-60  | 0.315792325 | 0.401 | 0.2   | 8.98E-56  | 6 LIX1-AS1    |
| 2.74E-58  | 0.315140894 | 0.7   | 0.449 | 8.79E-54  | 6 DHX15       |
| 9.27E-59  | 0.314789145 | 0.271 | 0.115 | 2.98E-54  | 6 STUM        |
| 4.79E-48  | 0.314364214 | 0.663 | 0.429 | 1.54E-43  | 6 CCDC171     |
| 4.37E-52  | 0.314055201 | 0.66  | 0.43  | 1.40E-47  | 6 SF1         |
| 2.74E-167 | 0.313954872 | 0.268 | 0.058 | 8.81E-163 | 6 DUSP9       |
| 8.57E-65  | 0.313148896 | 0.744 | 0.466 | 2.75E-60  | 6 PKD2        |
| 2.35E-96  | 0.313054134 | 0.491 | 0.222 | 7.53E-92  | 6 PXN         |
| 8.49E-47  | 0.312295734 | 0.643 | 0.415 | 2.73E-42  | 6 HLCS        |
| 1.53E-76  | 0.311647976 | 0.406 | 0.186 | 4.92E-72  | 6 PDCD4       |
| 3.99E-91  | 0.311577365 | 0.352 | 0.14  | 1.28E-86  | 6 SEPTIN7P9   |
| 1.14E-85  | 0.311379892 | 0.405 | 0.173 | 3.67E-81  | 6 AC011447.3  |
| 1.39E-68  | 0.31135499  | 0.45  | 0.23  | 4.47E-64  | 6 NHLRC3      |
| 1.34E-76  | 0.310845494 | 0.541 | 0.285 | 4.29E-72  | 6 AC138207.8  |
| 3.34E-72  | 0.310774737 | 0.494 | 0.254 | 1.07E-67  | 6 C2CD3       |
| 3.99E-62  | 0.310302647 | 0.614 | 0.366 | 1.28E-57  | 6 MIER1       |
| 6.92E-90  | 0.309994192 | 0.279 | 0.098 | 2.22E-85  | 6 GSTA4       |
| 1.76E-46  | 0.309605333 | 0.57  | 0.36  | 5.66E-42  | 6 VRK2        |

|           |             |       |       |           |              |
|-----------|-------------|-------|-------|-----------|--------------|
| 8.47E-54  | 0.309015169 | 0.546 | 0.324 | 2.72E-49  | 6 ASB3       |
| 1.72E-60  | 0.308838805 | 0.675 | 0.412 | 5.51E-56  | 6 DAAM1      |
| 5.72E-99  | 0.308835764 | 0.341 | 0.127 | 1.84E-94  | 6 ATP1A1-AS1 |
| 1.14E-82  | 0.308658109 | 0.268 | 0.093 | 3.67E-78  | 6 PAG1       |
| 2.25E-75  | 0.308601314 | 0.365 | 0.162 | 7.22E-71  | 6 ACYP1      |
| 3.22E-58  | 0.308217155 | 0.695 | 0.429 | 1.03E-53  | 6 RHBDD1     |
| 1.31E-73  | 0.307706781 | 0.391 | 0.179 | 4.20E-69  | 6 PGM1       |
| 1.63E-62  | 0.307614968 | 0.445 | 0.231 | 5.25E-58  | 6 CCNB1IP1   |
| 9.12E-57  | 0.306890975 | 0.738 | 0.479 | 2.93E-52  | 6 CLEC16A    |
| 2.02E-58  | 0.306112228 | 0.772 | 0.506 | 6.47E-54  | 6 ZNF254     |
| 2.92E-75  | 0.305376079 | 0.401 | 0.184 | 9.39E-71  | 6 IGSF3      |
| 5.30E-29  | 0.305366593 | 0.69  | 0.507 | 1.70E-24  | 6 ELF1       |
| 1.90E-70  | 0.304733537 | 0.447 | 0.223 | 6.10E-66  | 6 TOR1AIP2   |
| 2.44E-64  | 0.304652759 | 0.58  | 0.332 | 7.83E-60  | 6 KCTD3      |
| 1.13E-53  | 0.304540985 | 0.917 | 0.682 | 3.62E-49  | 6 HNRNPA2B1  |
| 1.06E-94  | 0.30432146  | 0.375 | 0.149 | 3.42E-90  | 6 AC245297.1 |
| 3.87E-75  | 0.304083396 | 0.268 | 0.1   | 1.24E-70  | 6 FA2H       |
| 2.81E-58  | 0.304035884 | 0.611 | 0.362 | 9.03E-54  | 6 CU633904.1 |
| 4.86E-68  | 0.303895445 | 0.525 | 0.285 | 1.56E-63  | 6 LINC00174  |
| 4.42E-70  | 0.302986823 | 0.619 | 0.346 | 1.42E-65  | 6 SPPL2A     |
| 1.56E-67  | 0.302949077 | 0.621 | 0.353 | 5.02E-63  | 6 BCL2L14    |
| 1.83E-81  | 0.302101929 | 0.341 | 0.14  | 5.89E-77  | 6 DLG3       |
| 9.95E-60  | 0.301689777 | 0.628 | 0.377 | 3.20E-55  | 6 CPT1A      |
| 8.64E-34  | 0.301069936 | 0.438 | 0.275 | 2.77E-29  | 6 CSRNP3     |
| 1.07E-40  | 0.299623073 | 0.514 | 0.32  | 3.42E-36  | 6 AC009690.2 |
| 3.01E-53  | 0.299419489 | 0.688 | 0.438 | 9.67E-49  | 6 AP2B1      |
| 6.68E-122 | 0.299030576 | 0.683 | 0.307 | 2.15E-117 | 6 LDLRAD4    |
| 3.56E-57  | 0.298859954 | 0.341 | 0.164 | 1.14E-52  | 6 ENTPD3-AS1 |
| 2.87E-55  | 0.298608173 | 0.632 | 0.385 | 9.21E-51  | 6 PTAR1      |
| 6.08E-70  | 0.297599019 | 0.394 | 0.187 | 1.95E-65  | 6 EPN1       |
| 2.41E-47  | 0.297282715 | 0.694 | 0.45  | 7.75E-43  | 6 FRK        |
| 2.31E-98  | 0.296999257 | 0.27  | 0.086 | 7.40E-94  | 6 AP1S2      |
| 2.01E-53  | 0.296279811 | 0.65  | 0.405 | 6.46E-49  | 6 EEA1       |
| 1.53E-66  | 0.295588784 | 0.397 | 0.19  | 4.92E-62  | 6 MBNL3      |
| 1.39E-98  | 0.295574044 | 0.321 | 0.113 | 4.47E-94  | 6 TMM45B     |
| 2.38E-87  | 0.295503822 | 0.576 | 0.281 | 7.66E-83  | 6 MAL        |
| 1.17E-107 | 0.295267696 | 0.25  | 0.072 | 3.75E-103 | 6 WNT5B      |
| 2.28E-67  | 0.295210202 | 0.442 | 0.22  | 7.34E-63  | 6 PLOD2      |
| 4.23E-80  | 0.295170124 | 0.292 | 0.111 | 1.36E-75  | 6 SLC12A8    |
| 2.80E-52  | 0.294964319 | 0.473 | 0.265 | 9.00E-48  | 6 STX18-AS1  |
| 2.59E-58  | 0.29468741  | 0.692 | 0.422 | 8.33E-54  | 6 SRGAP3     |
| 6.55E-75  | 0.293961993 | 0.496 | 0.253 | 2.10E-70  | 6 ITFG2      |
| 1.20E-18  | 0.293769542 | 0.467 | 0.326 | 3.85E-14  | 6 MET        |
| 3.24E-43  | 0.293763107 | 0.843 | 0.603 | 1.04E-38  | 6 CHCHD3     |
| 3.41E-43  | 0.293034512 | 0.796 | 0.559 | 1.10E-38  | 6 SGMS1      |
| 1.25E-57  | 0.292376897 | 0.615 | 0.365 | 4.00E-53  | 6 CDKL1      |
| 1.02E-95  | 0.292275318 | 0.302 | 0.107 | 3.28E-91  | 6 MARVELD2   |
| 1.43E-47  | 0.292211516 | 0.489 | 0.291 | 4.58E-43  | 6 ARFGAP3    |
| 2.83E-60  | 0.291628311 | 0.599 | 0.349 | 9.09E-56  | 6 HSDL2      |
| 1.21E-69  | 0.291538084 | 0.426 | 0.207 | 3.87E-65  | 6 DESI2      |
| 1.15E-47  | 0.290444306 | 0.603 | 0.382 | 3.69E-43  | 6 OXNAD1     |



|           |             |       |       |           |               |
|-----------|-------------|-------|-------|-----------|---------------|
| 3.09E-39  | 0.290324324 | 0.837 | 0.614 | 9.94E-35  | 6 ANKRD28     |
| 1.00E-78  | 0.290309023 | 0.616 | 0.333 | 3.21E-74  | 6 GPI         |
| 1.30E-48  | 0.29015034  | 0.567 | 0.34  | 4.18E-44  | 6 AC092944.1  |
| 5.63E-85  | 0.289950043 | 0.344 | 0.138 | 1.81E-80  | 6 ADAL        |
| 1.63E-67  | 0.289280774 | 0.496 | 0.259 | 5.22E-63  | 6 PPTC7       |
| 1.06E-61  | 0.288770821 | 0.503 | 0.275 | 3.40E-57  | 6 HADHB       |
| 2.21E-73  | 0.288679754 | 0.583 | 0.314 | 7.10E-69  | 6 LRP6        |
| 1.01E-55  | 0.288631107 | 0.692 | 0.438 | 3.26E-51  | 6 CPSF6       |
| 1.13E-57  | 0.288612722 | 0.855 | 0.587 | 3.62E-53  | 6 ZRANB2      |
| 1.10E-42  | 0.288554039 | 0.862 | 0.626 | 3.54E-38  | 6 TMCC1       |
| 3.35E-65  | 0.288519209 | 0.737 | 0.426 | 1.07E-60  | 6 KCNJ16      |
| 1.07E-63  | 0.288479481 | 0.466 | 0.248 | 3.43E-59  | 6 DMAC2L      |
| 7.57E-81  | 0.288174896 | 0.292 | 0.106 | 2.43E-76  | 6 KCNK13      |
| 9.63E-57  | 0.287309439 | 0.664 | 0.416 | 3.09E-52  | 6 FRS2        |
| 6.51E-90  | 0.287056943 | 0.53  | 0.252 | 2.09E-85  | 6 SGK2        |
| 1.14E-49  | 0.286977822 | 0.51  | 0.297 | 3.65E-45  | 6 CAPS2       |
| 6.72E-85  | 0.286914147 | 0.365 | 0.15  | 2.16E-80  | 6 AL158066.1  |
| 1.38E-57  | 0.286565417 | 0.473 | 0.251 | 4.42E-53  | 6 DOCK3       |
| 1.21E-112 | 0.286450327 | 0.272 | 0.08  | 3.90E-108 | 6 HOXC4       |
| 8.16E-91  | 0.286348103 | 0.267 | 0.09  | 2.62E-86  | 6 UQCC2       |
| 1.63E-60  | 0.286207448 | 0.446 | 0.234 | 5.24E-56  | 6 ZNF680      |
| 1.63E-64  | 0.285933238 | 0.444 | 0.224 | 5.24E-60  | 6 OSMR-AS1    |
| 6.32E-49  | 0.285786315 | 0.491 | 0.282 | 2.03E-44  | 6 BDNF-AS     |
| 8.12E-54  | 0.285005098 | 0.615 | 0.379 | 2.61E-49  | 6 AFTPH       |
| 4.73E-36  | 0.284827824 | 0.292 | 0.155 | 1.52E-31  | 6 ABHD3       |
| 4.89E-60  | 0.283996906 | 0.575 | 0.331 | 1.57E-55  | 6 MIRLET7BHG  |
| 1.22E-57  | 0.283333826 | 0.746 | 0.48  | 3.92E-53  | 6 SDHAP1      |
| 6.39E-54  | 0.283054232 | 0.388 | 0.201 | 2.05E-49  | 6 MRPS9       |
| 9.56E-60  | 0.281605123 | 0.471 | 0.254 | 3.07E-55  | 6 MYO19       |
| 2.49E-95  | 0.281071898 | 0.301 | 0.105 | 7.98E-91  | 6 AHDC1       |
| 4.42E-53  | 0.280735322 | 0.349 | 0.175 | 1.42E-48  | 6 LANCL1-AS1  |
| 4.61E-63  | 0.280692534 | 0.552 | 0.31  | 1.48E-58  | 6 IMMT        |
| 3.47E-51  | 0.280287538 | 0.42  | 0.224 | 1.11E-46  | 6 SCGB2B2     |
| 5.54E-32  | 0.279698351 | 0.668 | 0.475 | 1.78E-27  | 6 POU2F1      |
| 1.08E-81  | 0.279544644 | 0.322 | 0.127 | 3.47E-77  | 6 ZNF135      |
| 2.65E-53  | 0.279526399 | 0.413 | 0.223 | 8.52E-49  | 6 NAPB        |
| 6.77E-86  | 0.279499855 | 0.29  | 0.105 | 2.18E-81  | 6 SULT1C2P1   |
| 2.39E-71  | 0.279340654 | 0.261 | 0.099 | 7.66E-67  | 6 B4GALT6     |
| 9.31E-48  | 0.279314849 | 0.853 | 0.603 | 2.99E-43  | 6 USP24       |
| 3.07E-64  | 0.278288997 | 0.446 | 0.229 | 9.86E-60  | 6 ZNF138      |
| 1.31E-45  | 0.27807906  | 0.579 | 0.359 | 4.22E-41  | 6 TBCA        |
| 4.79E-27  | 0.277564879 | 0.924 | 0.755 | 1.54E-22  | 6 KIAA1217    |
| 2.89E-46  | 0.277458018 | 0.293 | 0.144 | 9.27E-42  | 6 TSPOAP1-AS1 |
| 4.63E-66  | 0.277332833 | 0.52  | 0.281 | 1.49E-61  | 6 GTF2H2B     |
| 6.17E-34  | 0.276885747 | 0.681 | 0.484 | 1.98E-29  | 6 DIAPH1      |
| 2.25E-62  | 0.276866544 | 0.381 | 0.179 | 7.23E-58  | 6 MPP6        |
| 5.22E-44  | 0.276835895 | 0.639 | 0.41  | 1.68E-39  | 6 TCAIM       |
| 6.48E-49  | 0.276797195 | 0.739 | 0.494 | 2.08E-44  | 6 ARFGF2      |
| 2.15E-31  | 0.276008189 | 0.288 | 0.161 | 6.91E-27  | 6 NAB1        |
| 1.71E-37  | 0.276007269 | 0.421 | 0.25  | 5.50E-33  | 6 NOVA1       |
| 4.87E-82  | 0.275642999 | 0.285 | 0.105 | 1.56E-77  | 6 ZNF682      |

|          |             |       |       |          |                |
|----------|-------------|-------|-------|----------|----------------|
| 7.98E-51 | 0.275558055 | 0.807 | 0.542 | 2.56E-46 | 6 PCMTD1       |
| 1.09E-38 | 0.275544746 | 0.449 | 0.27  | 3.49E-34 | 6 ANKRD6       |
| 9.13E-62 | 0.275087391 | 0.767 | 0.489 | 2.93E-57 | 6 NBPFI4       |
| 2.66E-57 | 0.274415004 | 0.672 | 0.415 | 8.55E-53 | 6 TVP23C-CDRT4 |
| 8.53E-35 | 0.274090335 | 0.841 | 0.617 | 2.74E-30 | 6 VPS13D       |
| 2.64E-60 | 0.274065659 | 0.579 | 0.334 | 8.49E-56 | 6 TRIM24       |
| 3.52E-52 | 0.273747794 | 0.383 | 0.198 | 1.13E-47 | 6 CEMIP        |
| 6.05E-67 | 0.273732106 | 0.356 | 0.161 | 1.94E-62 | 6 AL035530.2   |
| 6.35E-52 | 0.273521807 | 0.272 | 0.121 | 2.04E-47 | 6 AC007161.3   |
| 2.39E-47 | 0.273452994 | 0.591 | 0.367 | 7.68E-43 | 6 SS18         |
| 3.07E-92 | 0.273284982 | 0.893 | 0.542 | 9.86E-88 | 6 COL4A3       |
| 3.89E-34 | 0.27274569  | 0.963 | 0.789 | 1.25E-29 | 6 SIK3         |
| 1.90E-65 | 0.272604349 | 0.514 | 0.278 | 6.11E-61 | 6 GTF2H2       |
| 4.49E-30 | 0.272523343 | 0.736 | 0.533 | 1.44E-25 | 6 SPAG16       |
| 1.18E-43 | 0.272373886 | 0.558 | 0.349 | 3.80E-39 | 6 PCBD2        |
| 2.61E-54 | 0.272359383 | 0.492 | 0.278 | 8.39E-50 | 6 FP236241.1   |
| 5.58E-56 | 0.272343748 | 0.596 | 0.357 | 1.79E-51 | 6 GOLPH3       |
| 9.97E-54 | 0.272279007 | 0.529 | 0.298 | 3.20E-49 | 6 ASXL3        |
| 2.08E-57 | 0.271700374 | 0.451 | 0.242 | 6.66E-53 | 6 SERP1        |
| 7.86E-62 | 0.271234057 | 0.536 | 0.291 | 2.52E-57 | 6 ANKH         |
| 1.14E-88 | 0.271009508 | 0.445 | 0.197 | 3.67E-84 | 6 NAIPP2       |
| 7.24E-28 | 0.270403394 | 0.9   | 0.705 | 2.33E-23 | 6 NCOA2        |
| 8.18E-45 | 0.269688839 | 0.515 | 0.309 | 2.63E-40 | 6 MBOAT2       |
| 2.08E-39 | 0.269616471 | 0.557 | 0.353 | 6.67E-35 | 6 JADE1        |
| 5.41E-32 | 0.269406242 | 0.292 | 0.16  | 1.74E-27 | 6 AC073475.1   |
| 5.51E-91 | 0.269370905 | 0.251 | 0.08  | 1.77E-86 | 6 ZNF711       |
| 6.16E-58 | 0.269183937 | 0.521 | 0.295 | 1.98E-53 | 6 ASCC1        |
| 1.63E-61 | 0.268627336 | 0.545 | 0.305 | 5.24E-57 | 6 DNMT3A       |
| 3.36E-62 | 0.268459028 | 0.641 | 0.384 | 1.08E-57 | 6 RNF10        |
| 3.02E-57 | 0.268171576 | 0.277 | 0.12  | 9.69E-53 | 6 AC106791.1   |
| 6.11E-70 | 0.267929388 | 0.272 | 0.106 | 1.96E-65 | 6 THBS4        |
| 2.13E-30 | 0.267341431 | 0.261 | 0.142 | 6.83E-26 | 6 HBG2         |
| 1.06E-59 | 0.267006102 | 0.4   | 0.201 | 3.40E-55 | 6 LPXN         |
| 2.47E-45 | 0.266534243 | 0.52  | 0.314 | 7.92E-41 | 6 ZSCAN5A      |
| 8.01E-90 | 0.266171187 | 0.349 | 0.136 | 2.57E-85 | 6 GLRX         |
| 9.44E-45 | 0.2654225   | 0.762 | 0.505 | 3.03E-40 | 6 AC068205.2   |
| 6.64E-46 | 0.264942895 | 0.754 | 0.509 | 2.13E-41 | 6 DICER1       |
| 1.67E-72 | 0.264400722 | 0.418 | 0.189 | 5.37E-68 | 6 MAP2K6       |
| 9.26E-53 | 0.264249995 | 0.421 | 0.23  | 2.97E-48 | 6 AP5M1        |
| 1.18E-33 | 0.264115621 | 0.829 | 0.605 | 3.78E-29 | 6 DPH6         |
| 6.81E-72 | 0.263572856 | 0.387 | 0.176 | 2.19E-67 | 6 CEP120       |
| 5.41E-51 | 0.263340509 | 0.506 | 0.292 | 1.74E-46 | 6 ZNRF2P2      |
| 5.23E-49 | 0.263248374 | 0.6   | 0.367 | 1.68E-44 | 6 IQCH         |
| 5.48E-38 | 0.263082187 | 0.828 | 0.587 | 1.76E-33 | 6 TENT2        |
| 6.46E-47 | 0.262809629 | 0.48  | 0.277 | 2.08E-42 | 6 TMEM65       |
| 7.60E-67 | 0.262635706 | 0.53  | 0.285 | 2.44E-62 | 6 DNAJC11      |
| 1.30E-22 | 0.262282561 | 0.653 | 0.482 | 4.17E-18 | 6 SNX9         |
| 4.08E-53 | 0.262265058 | 0.66  | 0.404 | 1.31E-48 | 6 DNAH7        |
| 8.19E-55 | 0.262137673 | 0.587 | 0.345 | 2.63E-50 | 6 PRKCI        |
| 8.58E-79 | 0.262094624 | 0.444 | 0.205 | 2.76E-74 | 6 TSPAN14      |
| 4.37E-61 | 0.261660795 | 0.432 | 0.221 | 1.40E-56 | 6 ABHD12       |

|           |             |       |       |           |              |
|-----------|-------------|-------|-------|-----------|--------------|
| 6.20E-53  | 0.261648694 | 0.369 | 0.188 | 1.99E-48  | 6 SVOPL      |
| 3.06E-55  | 0.261549638 | 0.369 | 0.187 | 9.81E-51  | 6 ZBTB37     |
| 3.14E-51  | 0.26066365  | 0.337 | 0.166 | 1.01E-46  | 6 TMED11P    |
| 1.16E-34  | 0.25997975  | 0.7   | 0.488 | 3.72E-30  | 6 UMAD1      |
| 3.67E-43  | 0.259301261 | 0.301 | 0.148 | 1.18E-38  | 6 PHYHIPL    |
| 1.04E-52  | 0.259229489 | 0.379 | 0.195 | 3.33E-48  | 6 RAVR2      |
| 1.73E-22  | 0.258818096 | 0.393 | 0.258 | 5.57E-18  | 6 LINC01266  |
| 1.16E-62  | 0.258557672 | 0.492 | 0.264 | 3.72E-58  | 6 RIC3       |
| 5.05E-55  | 0.258400243 | 0.483 | 0.267 | 1.62E-50  | 6 TRAK2      |
| 6.96E-38  | 0.258306489 | 0.776 | 0.549 | 2.24E-33  | 6 TSC22D1    |
| 1.55E-70  | 0.257854493 | 0.349 | 0.153 | 4.97E-66  | 6 B3GNT2     |
| 4.42E-134 | 0.257499824 | 0.627 | 0.265 | 1.42E-129 | 6 ADAMTS17   |
| 3.34E-63  | 0.257297952 | 0.796 | 0.475 | 1.07E-58  | 6 HOXB3      |
| 1.31E-55  | 0.257046862 | 0.515 | 0.291 | 4.20E-51  | 6 MRRF       |
| 2.88E-63  | 0.256767879 | 0.472 | 0.243 | 9.26E-59  | 6 MYO5C      |
| 4.61E-67  | 0.256522532 | 0.515 | 0.271 | 1.48E-62  | 6 PKM        |
| 2.54E-54  | 0.256018329 | 0.474 | 0.262 | 8.15E-50  | 6 ZNF736     |
| 6.55E-47  | 0.255417957 | 0.45  | 0.251 | 2.10E-42  | 6 CTNNAL1    |
| 2.77E-109 | 0.255141429 | 0.343 | 0.118 | 8.89E-105 | 6 PGAP6      |
| 3.82E-58  | 0.255065675 | 0.499 | 0.28  | 1.23E-53  | 6 CIBAR1     |
| 2.12E-42  | 0.254965184 | 0.528 | 0.324 | 6.79E-38  | 6 TTN-AS1    |
| 7.76E-53  | 0.254663955 | 0.373 | 0.188 | 2.49E-48  | 6 AKAP7      |
| 2.57E-29  | 0.254518965 | 0.888 | 0.681 | 8.27E-25  | 6 UBE2H      |
| 2.75E-55  | 0.25448798  | 0.591 | 0.351 | 8.84E-51  | 6 CNN3       |
| 2.83E-48  | 0.254451993 | 0.518 | 0.309 | 9.10E-44  | 6 WDR41      |
| 1.06E-49  | 0.254364462 | 0.595 | 0.369 | 3.41E-45  | 6 ANO6       |
| 1.03E-22  | 0.254185495 | 0.334 | 0.21  | 3.32E-18  | 6 GPR137B    |
| 1.90E-71  | 0.254063405 | 0.347 | 0.151 | 6.11E-67  | 6 AKAP1      |
| 2.37E-52  | 0.254005745 | 0.595 | 0.357 | 7.61E-48  | 6 ZBTB44     |
| 1.36E-57  | 0.253919295 | 0.573 | 0.325 | 4.37E-53  | 6 ZNF532     |
| 9.70E-52  | 0.253884335 | 0.554 | 0.334 | 3.12E-47  | 6 UBQLN1     |
| 1.49E-37  | 0.253673567 | 0.685 | 0.466 | 4.80E-33  | 6 CCDC7      |
| 6.36E-39  | 0.253657573 | 0.542 | 0.342 | 2.04E-34  | 6 ACSL1      |
| 8.22E-67  | 0.253411234 | 0.905 | 0.595 | 2.64E-62  | 6 ITPR1      |
| 1.91E-50  | 0.25305614  | 0.474 | 0.266 | 6.13E-46  | 6 TTC28-AS1  |
| 2.06E-66  | 0.252791737 | 0.372 | 0.171 | 6.62E-62  | 6 NFE2L3     |
| 9.55E-57  | 0.252740424 | 0.545 | 0.309 | 3.07E-52  | 6 ETFA       |
| 2.58E-68  | 0.252332539 | 0.306 | 0.127 | 8.30E-64  | 6 AC009061.2 |
| 5.30E-56  | 0.252249687 | 0.574 | 0.337 | 1.70E-51  | 6 ATAD1      |
| 1.83E-37  | 0.251342176 | 0.849 | 0.607 | 5.87E-33  | 6 DNAH14     |
| 4.22E-93  | 0.251109308 | 0.562 | 0.26  | 1.36E-88  | 6 SCTR       |
| 1.25E-49  | 0.25088535  | 0.497 | 0.286 | 4.02E-45  | 6 ATP6V0E1   |
| 3.33E-70  | 0.250749424 | 0.426 | 0.205 | 1.07E-65  | 6 ZNF433-AS1 |
| 0         | 2.908749232 | 0.966 | 0.211 | 0         | 7 LINC01098  |
| 0         | 2.809596998 | 0.645 | 0.192 | 0         | 7 LSAMP      |
| 0         | 2.613673761 | 0.655 | 0.204 | 0         | 7 SNTG1      |
| 0         | 2.485975791 | 0.505 | 0.052 | 0         | 7 AC092691.1 |
| 0         | 2.455396674 | 0.796 | 0.227 | 0         | 7 RUNX1      |
| 0         | 2.43731034  | 0.956 | 0.337 | 0         | 7 MYO1B      |
| 0         | 2.429388591 | 0.742 | 0.234 | 0         | 7 GS1-24F4.2 |
| 0         | 2.354992943 | 0.985 | 0.476 | 0         | 7 SLC8A1     |

|           |             |       |       |           |               |
|-----------|-------------|-------|-------|-----------|---------------|
| 0         | 2.181910318 | 0.992 | 0.765 | 0         | 7 ARL15       |
| 0         | 2.097032567 | 0.956 | 0.427 | 0         | 7 TEX41       |
| 4.20E-293 | 2.095402122 | 0.898 | 0.497 | 1.35E-288 | 7 RTN4        |
| 0         | 2.077615816 | 0.884 | 0.408 | 0         | 7 VCL         |
| 1.55E-242 | 2.074228917 | 0.499 | 0.151 | 4.98E-238 | 7 RGS6        |
| 0         | 2.069993092 | 0.896 | 0.209 | 0         | 7 BHLHE40     |
| 0         | 2.063448584 | 0.977 | 0.662 | 0         | 7 FNDC3A      |
| 0         | 2.057822639 | 0.715 | 0.062 | 0         | 7 KRT19       |
| 0         | 2.023711186 | 0.881 | 0.476 | 0         | 7 SMAD3       |
| 0         | 2.006162922 | 0.949 | 0.52  | 0         | 7 ABTB2       |
| 0         | 1.974788054 | 0.894 | 0.323 | 0         | 7 CSGALNACT1  |
| 0         | 1.938836348 | 0.922 | 0.292 | 0         | 7 SLC8A1-AS1  |
| 3.19E-237 | 1.91722965  | 0.785 | 0.394 | 1.02E-232 | 7 ITGA2       |
| 0         | 1.891709448 | 0.989 | 0.774 | 0         | 7 GLIS3       |
| 9.94E-158 | 1.886492464 | 0.65  | 0.381 | 3.19E-153 | 7 TOX         |
| 0         | 1.86082969  | 0.928 | 0.463 | 0         | 7 TOX3        |
| 0         | 1.851378442 | 1     | 0.972 | 0         | 7 PDE4D       |
| 0         | 1.847436143 | 0.705 | 0.14  | 0         | 7 KCNIP1      |
| 0         | 1.801511408 | 0.635 | 0.077 | 0         | 7 IER3        |
| 0         | 1.799004494 | 0.798 | 0.172 | 0         | 7 APCDD1L-DT  |
| 0         | 1.789900533 | 0.608 | 0.169 | 0         | 7 MIR222HG    |
| 2.33E-245 | 1.747977928 | 0.804 | 0.392 | 7.48E-241 | 7 MIR4435-2HG |
| 0         | 1.746862218 | 0.964 | 0.388 | 0         | 7 PIK3C2G     |
| 3.23E-267 | 1.695068202 | 0.671 | 0.24  | 1.04E-262 | 7 ITGB6       |
| 0         | 1.689827841 | 0.992 | 0.605 | 0         | 7 PRKG1       |
| 5.06E-124 | 1.673087971 | 0.823 | 0.611 | 1.62E-119 | 7 PDE10A      |
| 0         | 1.66195145  | 0.633 | 0.147 | 0         | 7 SGK1        |
| 0         | 1.659775917 | 0.634 | 0.176 | 0         | 7 MAP3K14     |
| 0         | 1.656618574 | 0.64  | 0.192 | 0         | 7 CYTOR       |
| 0         | 1.655940722 | 0.656 | 0.191 | 0         | 7 CALB1       |
| 0         | 1.641869981 | 0.477 | 0.107 | 0         | 7 UPP1        |
| 0         | 1.636006394 | 0.992 | 0.816 | 0         | 7 COBLL1      |
| 0         | 1.633625107 | 0.742 | 0.223 | 0         | 7 ACTG1       |
| 0         | 1.632532118 | 0.367 | 0.061 | 0         | 7 S100A2      |
| 0         | 1.63119068  | 0.626 | 0.154 | 0         | 7 S100A6      |
| 0         | 1.595536059 | 0.596 | 0.15  | 0         | 7 FAM102A     |
| 0         | 1.573939278 | 1     | 0.769 | 0         | 7 MECOM       |
| 0         | 1.568420004 | 0.642 | 0.059 | 0         | 7 ADM         |
| 0         | 1.554282963 | 0.731 | 0.271 | 0         | 7 DEFB1       |
| 0         | 1.548910091 | 0.925 | 0.35  | 0         | 7 SOX5        |
| 6.49E-264 | 1.542220264 | 0.963 | 0.715 | 2.08E-259 | 7 GLS         |
| 0         | 1.541608868 | 0.664 | 0.139 | 0         | 7 GDF15       |
| 0         | 1.535776858 | 0.995 | 0.687 | 0         | 7 WSB1        |
| 0         | 1.521563148 | 0.969 | 0.596 | 0         | 7 LRRFIP1     |
| 6.70E-124 | 1.520034697 | 0.535 | 0.254 | 2.15E-119 | 7 HOMER1      |
| 1.60E-162 | 1.475848791 | 0.275 | 0.066 | 5.13E-158 | 7 PSG9        |
| 0         | 1.475510138 | 0.99  | 0.678 | 0         | 7 CADPS2      |
| 0         | 1.465966054 | 0.795 | 0.298 | 0         | 7 ACTB        |
| 0         | 1.451917467 | 0.766 | 0.26  | 0         | 7 MID1        |
| 1.24E-269 | 1.432444963 | 0.688 | 0.244 | 3.97E-265 | 7 KITLG       |
| 2.14E-286 | 1.430545285 | 0.47  | 0.116 | 6.87E-282 | 7 ELF3        |

|           |             |       |       |           |              |
|-----------|-------------|-------|-------|-----------|--------------|
| 0         | 1.426628501 | 0.686 | 0.173 | 0         | 7 GADD45B    |
| 1.49E-243 | 1.404757872 | 0.867 | 0.456 | 4.79E-239 | 7 ITGAV      |
| 0         | 1.39793728  | 0.729 | 0.252 | 0         | 7 PFKP       |
| 0         | 1.38645161  | 0.968 | 0.528 | 0         | 7 GRIP1      |
| 0         | 1.386044106 | 0.932 | 0.501 | 0         | 7 DPY19L2    |
| 0         | 1.384905001 | 0.356 | 0.038 | 0         | 7 SLC2A1     |
| 3.40E-296 | 1.378903154 | 0.504 | 0.125 | 1.09E-291 | 7 PCDH7      |
| 4.25E-287 | 1.376898418 | 0.869 | 0.469 | 1.37E-282 | 7 ACTN4      |
| 2.02E-202 | 1.35338193  | 0.876 | 0.542 | 6.49E-198 | 7 ARID5B     |
| 5.57E-301 | 1.334983453 | 0.899 | 0.452 | 1.79E-296 | 7 SPIRE1     |
| 6.39E-178 | 1.33466979  | 0.677 | 0.332 | 2.05E-173 | 7 SLC44A1    |
| 6.54E-194 | 1.32864005  | 0.943 | 0.686 | 2.10E-189 | 7 ZSWIM6     |
| 0         | 1.32849924  | 0.782 | 0.211 | 0         | 7 EMX1       |
| 2.05E-294 | 1.324602628 | 0.644 | 0.201 | 6.58E-290 | 7 NFKBIZ     |
| 0         | 1.32446917  | 0.727 | 0.247 | 0         | 7 DOT1L      |
| 1.04E-297 | 1.322967714 | 0.805 | 0.331 | 3.34E-293 | 7 SGPP1      |
| 2.76E-243 | 1.321436918 | 0.933 | 0.609 | 8.86E-239 | 7 GAREM1     |
| 2.25E-66  | 1.318155759 | 0.68  | 0.483 | 7.23E-62  | 7 SMARCA2    |
| 1.74E-180 | 1.305318406 | 0.917 | 0.656 | 5.58E-176 | 7 PPARGC1A   |
| 0         | 1.298060418 | 0.983 | 0.793 | 0         | 7 MED13L     |
| 8.70E-234 | 1.291897074 | 0.846 | 0.446 | 2.79E-229 | 7 RBBP8      |
| 2.01E-217 | 1.277142185 | 0.724 | 0.325 | 6.45E-213 | 7 PAPP A     |
| 0         | 1.268870999 | 0.703 | 0.159 | 0         | 7 HUNK       |
| 2.04E-233 | 1.267168959 | 0.744 | 0.334 | 6.54E-229 | 7 RNLS       |
| 0         | 1.262417288 | 0.925 | 0.317 | 0         | 7 BMPR1B     |
| 0         | 1.249976351 | 0.826 | 0.246 | 0         | 7 PDE1C      |
| 1.32E-172 | 1.249804064 | 0.837 | 0.469 | 4.24E-168 | 7 NDRG1      |
| 5.73E-116 | 1.246848396 | 0.503 | 0.225 | 1.84E-111 | 7 SLC20A1    |
| 1.33E-230 | 1.245037029 | 0.929 | 0.581 | 4.28E-226 | 7 PRKAG2     |
| 3.73E-264 | 1.232343226 | 0.872 | 0.407 | 1.20E-259 | 7 TMTC2      |
| 1.88E-233 | 1.228970455 | 0.897 | 0.465 | 6.04E-229 | 7 AC138305.1 |
| 6.04E-308 | 1.220962217 | 0.999 | 0.752 | 1.94E-303 | 7 AC019197.1 |
| 0         | 1.200076104 | 0.804 | 0.25  | 0         | 7 NRCAM      |
| 1.60E-221 | 1.193970391 | 0.917 | 0.513 | 5.13E-217 | 7 OSBPL3     |
| 3.31E-238 | 1.191404181 | 0.526 | 0.16  | 1.06E-233 | 7 ANGPT1     |
| 3.54E-161 | 1.185305953 | 0.495 | 0.184 | 1.14E-156 | 7 PFKFB3     |
| 0         | 1.180593693 | 0.531 | 0.116 | 0         | 7 LGALS3     |
| 4.73E-205 | 1.165602752 | 0.812 | 0.395 | 1.52E-200 | 7 ACSL4      |
| 9.33E-212 | 1.160814927 | 0.925 | 0.543 | 3.00E-207 | 7 MYO1E      |
| 1.13E-244 | 1.152977543 | 0.933 | 0.59  | 3.64E-240 | 7 CD2AP      |
| 6.82E-217 | 1.150681465 | 0.754 | 0.34  | 2.19E-212 | 7 STIM2      |
| 6.05E-198 | 1.14828246  | 0.816 | 0.432 | 1.94E-193 | 7 PAQR5      |
| 0         | 1.147932335 | 0.653 | 0.152 | 0         | 7 SLC7A1     |
| 1.04E-286 | 1.144745931 | 0.671 | 0.234 | 3.36E-282 | 7 SDC4       |
| 1.04E-214 | 1.143351545 | 0.86  | 0.49  | 3.34E-210 | 7 PPP1CB     |
| 6.89E-284 | 1.141028034 | 0.779 | 0.295 | 2.21E-279 | 7 FAM110B    |
| 2.34E-168 | 1.138702623 | 0.672 | 0.318 | 7.51E-164 | 7 LIMA1      |
| 6.47E-250 | 1.12712947  | 0.837 | 0.399 | 2.08E-245 | 7 GTF2IRD1   |
| 2.65E-280 | 1.126386952 | 0.583 | 0.169 | 8.50E-276 | 7 BTG2       |
| 1.29E-120 | 1.124989784 | 0.801 | 0.477 | 4.15E-116 | 7 HIF1A      |
| 0         | 1.120835308 | 0.353 | 0.052 | 0         | 7 APCDD1L    |

|           |             |       |       |           |              |
|-----------|-------------|-------|-------|-----------|--------------|
| 5.79E-222 | 1.116999079 | 0.903 | 0.556 | 1.86E-217 | 7 NLK        |
| 3.25E-179 | 1.11472477  | 0.65  | 0.285 | 1.04E-174 | 7 LINC02694  |
| 1.04E-287 | 1.113472945 | 0.802 | 0.34  | 3.35E-283 | 7 SPATS2     |
| 4.62E-271 | 1.10555951  | 0.726 | 0.278 | 1.48E-266 | 7 FOSL2      |
| 1.10E-171 | 1.099587824 | 0.798 | 0.393 | 3.54E-167 | 7 SCIN       |
| 1.35E-191 | 1.089897661 | 0.819 | 0.446 | 4.35E-187 | 7 MCU        |
| 1.23E-261 | 1.087643958 | 0.654 | 0.223 | 3.94E-257 | 7 NPAS2      |
| 2.74E-208 | 1.080966731 | 0.697 | 0.288 | 8.81E-204 | 7 ATP1B3     |
| 3.04E-260 | 1.080283021 | 0.486 | 0.131 | 9.78E-256 | 7 RAB11FIP1  |
| 5.20E-249 | 1.072875439 | 0.81  | 0.355 | 1.67E-244 | 7 CRYBG1     |
| 4.04E-254 | 1.070166309 | 0.856 | 0.425 | 1.30E-249 | 7 HDAC4      |
| 2.45E-236 | 1.064488866 | 0.901 | 0.548 | 7.88E-232 | 7 YAP1       |
| 2.54E-208 | 1.06290606  | 0.627 | 0.241 | 8.16E-204 | 7 CHSY1      |
| 1.82E-204 | 1.060959548 | 0.878 | 0.526 | 5.83E-200 | 7 GBE1       |
| 3.28E-282 | 1.060579582 | 0.526 | 0.138 | 1.05E-277 | 7 EEPD1      |
| 9.14E-244 | 1.05289854  | 0.914 | 0.535 | 2.93E-239 | 7 TRAK1      |
| 1.54E-205 | 1.050424089 | 0.842 | 0.465 | 4.96E-201 | 7 TOP1       |
| 4.95E-218 | 1.034884638 | 0.806 | 0.395 | 1.59E-213 | 7 TMEM51     |
| 1.29E-171 | 1.033920912 | 0.868 | 0.521 | 4.15E-167 | 7 CYRIB      |
| 3.47E-211 | 1.028840626 | 0.97  | 0.676 | 1.11E-206 | 7 FHOD3      |
| 1.92E-157 | 1.025815251 | 0.952 | 0.703 | 6.16E-153 | 7 ATP1B1     |
| 2.54E-174 | 1.009861523 | 0.788 | 0.425 | 8.15E-170 | 7 SEPTIN9    |
| 6.51E-205 | 1.000130443 | 0.874 | 0.499 | 2.09E-200 | 7 C4orf19    |
| 3.39E-193 | 0.997801042 | 0.5   | 0.17  | 1.09E-188 | 7 HMGCS1     |
| 8.97E-131 | 0.996622225 | 0.703 | 0.359 | 2.88E-126 | 7 AC004593.2 |
| 7.36E-248 | 0.993928153 | 0.654 | 0.238 | 2.36E-243 | 7 CRY1       |
| 7.92E-156 | 0.992475183 | 0.714 | 0.345 | 2.54E-151 | 7 SYTL2      |
| 2.49E-199 | 0.991971169 | 0.652 | 0.258 | 7.99E-195 | 7 KCTD8      |
| 2.58E-143 | 0.989625144 | 0.873 | 0.537 | 8.28E-139 | 7 ARHGAP29   |
| 2.02E-132 | 0.984084808 | 0.926 | 0.669 | 6.49E-128 | 7 THSD7A     |
| 2.28E-144 | 0.983160373 | 0.561 | 0.247 | 7.33E-140 | 7 GNA13      |
| 6.50E-285 | 0.978974887 | 0.463 | 0.108 | 2.09E-280 | 7 LDLR       |
| 3.10E-153 | 0.977409123 | 0.514 | 0.205 | 9.94E-149 | 7 EIF2AK3    |
| 2.49E-199 | 0.973721623 | 0.789 | 0.383 | 8.00E-195 | 7 MYO5A      |
| 2.41E-274 | 0.971790728 | 0.424 | 0.092 | 7.75E-270 | 7 HMGCS2     |
| 3.19E-142 | 0.965896364 | 0.826 | 0.517 | 1.03E-137 | 7 HIVEP2     |
| 1.95E-186 | 0.963637504 | 0.753 | 0.373 | 6.25E-182 | 7 PARD6B     |
| 4.41E-207 | 0.96302023  | 0.775 | 0.381 | 1.42E-202 | 7 RCOR1      |
| 1.42E-220 | 0.959243986 | 0.951 | 0.642 | 4.55E-216 | 7 MAP4       |
| 2.76E-193 | 0.95223076  | 0.895 | 0.537 | 8.88E-189 | 7 MRTFA      |
| 8.68E-56  | 0.947225811 | 0.521 | 0.323 | 2.79E-51  | 7 MET        |
| 1.01E-194 | 0.942030333 | 0.952 | 0.66  | 3.25E-190 | 7 MAP4K3     |
| 1.05E-207 | 0.941095737 | 0.566 | 0.201 | 3.36E-203 | 7 UXS1       |
| 3.17E-132 | 0.940072237 | 0.861 | 0.556 | 1.02E-127 | 7 WWTR1      |
| 7.30E-171 | 0.933734861 | 0.94  | 0.64  | 2.34E-166 | 7 RAD51B     |
| 6.99E-92  | 0.93051478  | 0.62  | 0.351 | 2.25E-87  | 7 IFRD1      |
| 4.07E-131 | 0.922213688 | 0.878 | 0.571 | 1.31E-126 | 7 WWC1       |
| 1.42E-181 | 0.92192899  | 0.84  | 0.475 | 4.56E-177 | 7 DIAPH1     |
| 1.29E-138 | 0.920335076 | 0.644 | 0.311 | 4.16E-134 | 7 KLF6       |
| 0         | 0.911679569 | 0.541 | 0.131 | 0         | 7 PLCZ1      |
| 4.45E-152 | 0.910666057 | 0.645 | 0.311 | 1.43E-147 | 7 SNX2       |

|           |             |       |       |           |              |
|-----------|-------------|-------|-------|-----------|--------------|
| 1.21E-178 | 0.910545894 | 0.633 | 0.268 | 3.87E-174 | 7 SGMS2      |
| 0         | 0.908000419 | 0.407 | 0.077 | 0         | 7 RASAL1     |
| 3.36E-90  | 0.907344961 | 0.665 | 0.4   | 1.08E-85  | 7 CDK6       |
| 3.55E-116 | 0.907209357 | 0.772 | 0.445 | 1.14E-111 | 7 FAM107B    |
| 9.78E-217 | 0.905561125 | 0.776 | 0.352 | 3.14E-212 | 7 CHRM3      |
| 3.45E-188 | 0.903308215 | 0.7   | 0.321 | 1.11E-183 | 7 REEP3      |
| 1.02E-275 | 0.900879447 | 0.432 | 0.099 | 3.27E-271 | 7 MSMO1      |
| 6.74E-196 | 0.895320075 | 0.946 | 0.637 | 2.17E-191 | 7 CTNNA1     |
| 2.42E-211 | 0.892854985 | 0.966 | 0.599 | 7.78E-207 | 7 KCNIP4     |
| 3.64E-178 | 0.888746771 | 0.848 | 0.483 | 1.17E-173 | 7 EYA3       |
| 1.88E-246 | 0.887902378 | 0.785 | 0.353 | 6.05E-242 | 7 CU633904.1 |
| 1.09E-188 | 0.887843212 | 0.977 | 0.696 | 3.51E-184 | 7 PRKCA      |
| 5.65E-164 | 0.886373257 | 0.495 | 0.183 | 1.82E-159 | 7 TUFT1      |
| 0         | 0.885859466 | 0.37  | 0.027 | 0         | 7 NR0B2      |
| 1.80E-121 | 0.885298629 | 0.335 | 0.112 | 5.79E-117 | 7 MIDN       |
| 1.44E-211 | 0.883860265 | 0.822 | 0.399 | 4.61E-207 | 7 TBC1D8     |
| 2.20E-307 | 0.873554733 | 0.558 | 0.146 | 7.06E-303 | 7 PIM3       |
| 0         | 0.870150387 | 0.655 | 0.188 | 0         | 7 SLC38A11   |
| 8.91E-185 | 0.869728748 | 0.865 | 0.436 | 2.86E-180 | 7 SCN2A      |
| 7.44E-238 | 0.862189518 | 0.516 | 0.151 | 2.39E-233 | 7 ANXA2      |
| 1.31E-200 | 0.862065872 | 0.753 | 0.343 | 4.20E-196 | 7 ANXA11     |
| 3.34E-95  | 0.859759913 | 0.896 | 0.671 | 1.07E-90  | 7 NFE2L2     |
| 1.44E-175 | 0.854067669 | 0.845 | 0.438 | 4.64E-171 | 7 DACH1      |
| 1.38E-107 | 0.853666669 | 0.842 | 0.572 | 4.43E-103 | 7 HECTD1     |
| 5.47E-185 | 0.852852036 | 0.992 | 0.88  | 1.76E-180 | 7 IMMP2L     |
| 2.04E-227 | 0.850291183 | 0.423 | 0.107 | 6.55E-223 | 7 AQP2       |
| 3.73E-99  | 0.848964069 | 0.833 | 0.54  | 1.20E-94  | 7 STARD13    |
| 7.92E-224 | 0.847598002 | 0.868 | 0.415 | 2.54E-219 | 7 HSD11B2    |
| 4.90E-277 | 0.847460588 | 0.547 | 0.148 | 1.57E-272 | 7 TPM4       |
| 1.71E-148 | 0.846467168 | 0.667 | 0.305 | 5.49E-144 | 7 CCDC178    |
| 2.22E-271 | 0.846291173 | 0.464 | 0.11  | 7.12E-267 | 7 BARX2      |
| 3.89E-168 | 0.831800132 | 0.987 | 0.826 | 1.25E-163 | 7 JMJD1C     |
| 1.45E-208 | 0.83108921  | 0.413 | 0.108 | 4.66E-204 | 7 AC044810.3 |
| 8.91E-128 | 0.829987679 | 0.949 | 0.696 | 2.86E-123 | 7 RBM47      |
| 5.77E-105 | 0.829477797 | 0.909 | 0.642 | 1.85E-100 | 7 SH3RF1     |
| 5.81E-244 | 0.824611263 | 0.55  | 0.169 | 1.87E-239 | 7 TWSG1      |
| 7.43E-78  | 0.824323327 | 0.806 | 0.554 | 2.39E-73  | 7 VMP1       |
| 1.74E-94  | 0.819806361 | 0.777 | 0.492 | 5.60E-90  | 7 LRP1B      |
| 1.49E-145 | 0.819658125 | 0.963 | 0.728 | 4.78E-141 | 7 NFAT5      |
| 3.37E-212 | 0.81796269  | 0.662 | 0.239 | 1.08E-207 | 7 MSR1       |
| 1.67E-265 | 0.817497918 | 0.398 | 0.086 | 5.35E-261 | 7 NT5DC3     |
| 5.79E-134 | 0.814771432 | 0.959 | 0.746 | 1.86E-129 | 7 BABAM2     |
| 1.78E-131 | 0.810504058 | 0.532 | 0.224 | 5.72E-127 | 7 LINC01036  |
| 2.06E-139 | 0.809810953 | 0.777 | 0.428 | 6.63E-135 | 7 STK24      |
| 5.15E-195 | 0.807864197 | 0.657 | 0.254 | 1.65E-190 | 7 ZNF208     |
| 5.12E-114 | 0.806219386 | 0.547 | 0.259 | 1.64E-109 | 7 MSN        |
| 1.33E-108 | 0.80542521  | 0.667 | 0.343 | 4.26E-104 | 7 SGPP2      |
| 1.20E-143 | 0.804971478 | 0.883 | 0.581 | 3.87E-139 | 7 EML4       |
| 2.47E-151 | 0.802750039 | 0.971 | 0.67  | 7.92E-147 | 7 KAZN       |
| 7.74E-159 | 0.801064424 | 0.635 | 0.288 | 2.48E-154 | 7 CHPT1      |
| 8.30E-220 | 0.79976979  | 0.851 | 0.397 | 2.67E-215 | 7 KCNQ1      |

|           |             |       |       |           |               |
|-----------|-------------|-------|-------|-----------|---------------|
| 3.36E-94  | 0.797691516 | 0.675 | 0.38  | 1.08E-89  | 7 ADAMTS16    |
| 6.63E-153 | 0.796292705 | 0.953 | 0.648 | 2.13E-148 | 7 LIMCH1      |
| 9.06E-201 | 0.794683839 | 0.727 | 0.324 | 2.91E-196 | 7 PPP4R1      |
| 4.12E-124 | 0.794322978 | 0.708 | 0.365 | 1.32E-119 | 7 PCDH9       |
| 3.87E-210 | 0.793647942 | 0.983 | 0.819 | 1.24E-205 | 7 ZFAND3      |
| 1.28E-80  | 0.793169374 | 0.316 | 0.129 | 4.10E-76  | 7 IL1RAPL1    |
| 8.81E-176 | 0.787517096 | 0.961 | 0.725 | 2.83E-171 | 7 MYO6        |
| 1.19E-126 | 0.785186279 | 0.966 | 0.703 | 3.81E-122 | 7 ADAMTS9-AS2 |
| 3.95E-130 | 0.78300862  | 0.704 | 0.347 | 1.27E-125 | 7 PPARG       |
| 8.36E-120 | 0.782803493 | 0.956 | 0.696 | 2.68E-115 | 7 FRAS1       |
| 2.37E-126 | 0.781886512 | 0.808 | 0.469 | 7.62E-122 | 7 ESYT2       |
| 1.99E-93  | 0.78073524  | 0.826 | 0.56  | 6.38E-89  | 7 DCDC2       |
| 9.02E-216 | 0.778553113 | 0.76  | 0.334 | 2.90E-211 | 7 SCML1       |
| 4.02E-232 | 0.77779694  | 0.888 | 0.385 | 1.29E-227 | 7 MPPED2      |
| 3.58E-116 | 0.773804166 | 0.573 | 0.276 | 1.15E-111 | 7 ZNF395      |
| 4.42E-156 | 0.772918011 | 0.631 | 0.277 | 1.42E-151 | 7 SH3BP4      |
| 3.99E-165 | 0.772390308 | 0.527 | 0.19  | 1.28E-160 | 7 MAPK4       |
| 7.13E-199 | 0.772255307 | 0.666 | 0.266 | 2.29E-194 | 7 RALBP1      |
| 9.73E-100 | 0.764230933 | 0.966 | 0.783 | 3.13E-95  | 7 NR3C2       |
| 3.32E-264 | 0.762085619 | 0.537 | 0.145 | 1.07E-259 | 7 AC011586.2  |
| 3.21E-57  | 0.760380787 | 0.747 | 0.501 | 1.03E-52  | 7 NAV2        |
| 2.81E-98  | 0.759832944 | 0.895 | 0.616 | 9.02E-94  | 7 ATP1A1      |
| 4.01E-181 | 0.758363081 | 0.979 | 0.794 | 1.29E-176 | 7 TCF12       |
| 2.40E-167 | 0.756245082 | 0.648 | 0.284 | 7.72E-163 | 7 PHTF2       |
| 1.30E-155 | 0.755841195 | 0.642 | 0.274 | 4.19E-151 | 7 CDH1        |
| 2.27E-152 | 0.755504179 | 0.982 | 0.776 | 7.28E-148 | 7 NAALADL2    |
| 0         | 0.754028091 | 0.469 | 0.069 | 0         | 7 TNFRSF12A   |
| 2.80E-144 | 0.753390381 | 0.582 | 0.254 | 8.98E-140 | 7 RAPH1       |
| 7.37E-123 | 0.750387339 | 0.572 | 0.26  | 2.37E-118 | 7 KSR2        |
| 4.03E-123 | 0.742218349 | 0.884 | 0.6   | 1.30E-118 | 7 FER         |
| 1.19E-194 | 0.740441667 | 0.467 | 0.146 | 3.82E-190 | 7 LINC00963   |
| 4.87E-71  | 0.73963549  | 0.414 | 0.206 | 1.56E-66  | 7 SMS         |
| 3.10E-121 | 0.73950639  | 0.882 | 0.567 | 9.95E-117 | 7 LAMB1       |
| 2.33E-134 | 0.737575845 | 0.866 | 0.505 | 7.48E-130 | 7 PTBP3       |
| 9.74E-91  | 0.737069046 | 0.67  | 0.385 | 3.13E-86  | 7 CMSS1       |
| 6.26E-113 | 0.733292095 | 0.828 | 0.547 | 2.01E-108 | 7 ADGRL2      |
| 6.87E-250 | 0.731255269 | 0.629 | 0.206 | 2.21E-245 | 7 CBR3-AS1    |
| 7.88E-189 | 0.730332801 | 0.285 | 0.06  | 2.53E-184 | 7 AQP3        |
| 4.18E-195 | 0.727753731 | 0.454 | 0.139 | 1.34E-190 | 7 SLC25A25    |
| 2.25E-129 | 0.721484183 | 0.631 | 0.311 | 7.22E-125 | 7 SEPTIN10    |
| 1.89E-196 | 0.721249822 | 0.474 | 0.15  | 6.06E-192 | 7 HMGCR       |
| 1.59E-84  | 0.720485111 | 0.835 | 0.55  | 5.11E-80  | 7 FNIP2       |
| 3.81E-147 | 0.717405414 | 0.73  | 0.377 | 1.22E-142 | 7 ACTR3       |
| 7.66E-138 | 0.717013783 | 0.97  | 0.741 | 2.46E-133 | 7 BTBD9       |
| 1.82E-287 | 0.716290846 | 0.338 | 0.056 | 5.84E-283 | 7 GATA2       |
| 1.27E-101 | 0.713905734 | 0.752 | 0.454 | 4.07E-97  | 7 GALNT11     |
| 5.86E-255 | 0.713843198 | 0.475 | 0.125 | 1.88E-250 | 7 AC106795.1  |
| 3.36E-118 | 0.711454868 | 0.705 | 0.388 | 1.08E-113 | 7 PHACTR2     |
| 9.23E-126 | 0.710887685 | 0.884 | 0.563 | 2.97E-121 | 7 ASAP2       |
| 3.46E-138 | 0.710811524 | 0.982 | 0.784 | 1.11E-133 | 7 RBPMS       |
| 1.25E-276 | 0.706867957 | 0.62  | 0.174 | 4.00E-272 | 7 PWRN1       |



|           |             |       |       |           |              |
|-----------|-------------|-------|-------|-----------|--------------|
| 2.23E-119 | 0.705644008 | 0.839 | 0.501 | 7.17E-115 | 7 RHOBTB3    |
| 8.23E-138 | 0.70335226  | 0.751 | 0.384 | 2.64E-133 | 7 TBC1D9     |
| 8.23E-128 | 0.702754533 | 0.876 | 0.601 | 2.64E-123 | 7 CHCHD3     |
| 1.29E-68  | 0.70146207  | 0.431 | 0.218 | 4.13E-64  | 7 SQSTM1     |
| 4.75E-84  | 0.69788568  | 0.765 | 0.483 | 1.53E-79  | 7 MLLT3      |
| 6.15E-106 | 0.692313925 | 0.771 | 0.463 | 1.98E-101 | 7 SNRK       |
| 1.84E-90  | 0.690572647 | 0.519 | 0.261 | 5.92E-86  | 7 SLC49A4    |
| 7.36E-185 | 0.688959394 | 0.412 | 0.118 | 2.36E-180 | 7 RASD1      |
| 4.27E-139 | 0.687668575 | 0.982 | 0.788 | 1.37E-134 | 7 SIK3       |
| 1.31E-143 | 0.684762518 | 0.701 | 0.329 | 4.20E-139 | 7 SLC38A1    |
| 8.86E-71  | 0.683988316 | 0.874 | 0.639 | 2.84E-66  | 7 NFIB       |
| 1.95E-115 | 0.682171017 | 0.914 | 0.669 | 6.27E-111 | 7 EIF4G3     |
| 2.58E-97  | 0.681714917 | 0.53  | 0.262 | 8.30E-93  | 7 GAB2       |
| 6.45E-143 | 0.68142268  | 0.806 | 0.451 | 2.07E-138 | 7 LMBR1      |
| 6.86E-100 | 0.678131005 | 0.718 | 0.412 | 2.20E-95  | 7 MYH9       |
| 2.79E-39  | 0.677381081 | 0.712 | 0.569 | 8.95E-35  | 7 RALYL      |
| 7.29E-84  | 0.674237914 | 0.806 | 0.479 | 2.34E-79  | 7 NOS1AP     |
| 1.97E-201 | 0.673992507 | 0.524 | 0.162 | 6.34E-197 | 7 AC011586.1 |
| 1.84E-84  | 0.671503311 | 0.821 | 0.557 | 5.90E-80  | 7 ZNF704     |
| 4.16E-137 | 0.671113544 | 0.799 | 0.448 | 1.34E-132 | 7 SREBF2     |
| 7.11E-123 | 0.669824645 | 0.676 | 0.339 | 2.28E-118 | 7 ELOVL7     |
| 1.45E-54  | 0.667469906 | 0.324 | 0.154 | 4.64E-50  | 7 PAPSS2     |
| 8.64E-111 | 0.666787931 | 0.536 | 0.246 | 2.77E-106 | 7 CTNNA1     |
| 1.37E-104 | 0.666093998 | 0.785 | 0.47  | 4.39E-100 | 7 CLIP1      |
| 2.68E-125 | 0.664283538 | 0.944 | 0.679 | 8.62E-121 | 7 UBE2H      |
| 0         | 0.662252709 | 0.356 | 0.039 | 0         | 7 ZC3H12A    |
| 4.09E-202 | 0.660141274 | 0.614 | 0.23  | 1.31E-197 | 7 CCDC12     |
| 6.55E-23  | 0.655237056 | 0.448 | 0.321 | 2.10E-18  | 7 COL4A1     |
| 2.08E-201 | 0.654543646 | 0.555 | 0.19  | 6.67E-197 | 7 PPARC      |
| 5.27E-73  | 0.652212414 | 0.574 | 0.327 | 1.69E-68  | 7 RYBP       |
| 1.56E-131 | 0.651755494 | 0.772 | 0.436 | 5.01E-127 | 7 ZNF516     |
| 1.11E-181 | 0.650086538 | 0.427 | 0.129 | 3.58E-177 | 7 AC093512.2 |
| 2.82E-120 | 0.648117924 | 0.663 | 0.325 | 9.05E-116 | 7 BLNK       |
| 2.90E-101 | 0.645081085 | 0.753 | 0.45  | 9.30E-97  | 7 GPC5       |
| 1.60E-201 | 0.644124893 | 0.695 | 0.265 | 5.15E-197 | 7 SCN3A      |
| 1.33E-113 | 0.643822542 | 0.948 | 0.703 | 4.26E-109 | 7 BRAF       |
| 2.17E-120 | 0.643647256 | 0.687 | 0.36  | 6.97E-116 | 7 VAV2       |
| 8.04E-144 | 0.643038446 | 0.39  | 0.125 | 2.58E-139 | 7 FLNA       |
| 3.98E-76  | 0.642286224 | 0.869 | 0.604 | 1.28E-71  | 7 RBMS1      |
| 6.48E-97  | 0.640617044 | 0.541 | 0.269 | 2.08E-92  | 7 ANKRD13A   |
| 5.80E-94  | 0.640429003 | 0.956 | 0.772 | 1.86E-89  | 7 SETBP1     |
| 1.05E-102 | 0.64016839  | 0.847 | 0.557 | 3.37E-98  | 7 SGMS1      |
| 1.55E-100 | 0.639576616 | 0.609 | 0.316 | 4.98E-96  | 7 PISD       |
| 1.83E-65  | 0.639010644 | 0.529 | 0.302 | 5.88E-61  | 7 KIZ        |
| 8.94E-98  | 0.638999394 | 0.79  | 0.496 | 2.87E-93  | 7 CHD2       |
| 2.71E-102 | 0.637371013 | 0.661 | 0.358 | 8.71E-98  | 7 ITGB1      |
| 1.12E-130 | 0.635838833 | 0.754 | 0.426 | 3.60E-126 | 7 ABI2       |
| 5.57E-87  | 0.631410876 | 0.802 | 0.494 | 1.79E-82  | 7 EPB41L3    |
| 1.19E-120 | 0.627428216 | 0.798 | 0.469 | 3.83E-116 | 7 MTX2       |
| 2.05E-120 | 0.625528519 | 0.617 | 0.304 | 6.59E-116 | 7 RAB11FIP2  |
| 5.65E-170 | 0.622407445 | 0.29  | 0.068 | 1.81E-165 | 7 KLF10      |

|           |             |       |       |           |              |
|-----------|-------------|-------|-------|-----------|--------------|
| 1.79E-133 | 0.619048596 | 0.636 | 0.307 | 5.73E-129 | 7 ARHGAP17   |
| 1.83E-149 | 0.618881555 | 0.475 | 0.177 | 5.86E-145 | 7 AMD1       |
| 6.58E-200 | 0.617906642 | 0.382 | 0.1   | 2.11E-195 | 7 ZNF430     |
| 6.53E-115 | 0.614694802 | 0.945 | 0.72  | 2.10E-110 | 7 ANKRD17    |
| 2.30E-98  | 0.609012589 | 0.619 | 0.324 | 7.40E-94  | 7 CREM       |
| 5.57E-79  | 0.607776189 | 0.403 | 0.185 | 1.79E-74  | 7 SEMA4B     |
| 5.65E-155 | 0.607086586 | 0.473 | 0.168 | 1.81E-150 | 7 TES        |
| 2.61E-73  | 0.606682932 | 0.756 | 0.498 | 8.37E-69  | 7 GAB1       |
| 7.60E-79  | 0.605644096 | 0.966 | 0.824 | 2.44E-74  | 7 BICC1      |
| 1.55E-127 | 0.605318808 | 0.851 | 0.491 | 4.97E-123 | 7 ARHGEF3    |
| 1.22E-122 | 0.604770637 | 0.774 | 0.413 | 3.91E-118 | 7 SCNN1A     |
| 4.46E-153 | 0.602743386 | 0.396 | 0.125 | 1.43E-148 | 7 MAP2K3     |
| 1.07E-98  | 0.602310441 | 0.909 | 0.637 | 3.44E-94  | 7 ARHGEF12   |
| 4.32E-109 | 0.602004705 | 0.863 | 0.539 | 1.39E-104 | 7 TPST1      |
| 1.24E-91  | 0.601385603 | 0.883 | 0.621 | 4.00E-87  | 7 SCMH1      |
| 7.70E-115 | 0.600559707 | 0.711 | 0.363 | 2.47E-110 | 7 FRY        |
| 6.10E-103 | 0.599063781 | 0.759 | 0.443 | 1.96E-98  | 7 PCGF5      |
| 2.97E-139 | 0.598671013 | 0.588 | 0.257 | 9.54E-135 | 7 LINC00472  |
| 6.65E-166 | 0.593920405 | 0.749 | 0.36  | 2.14E-161 | 7 ATP13A3    |
| 7.81E-89  | 0.593355863 | 0.863 | 0.58  | 2.51E-84  | 7 MITF       |
| 4.41E-83  | 0.593182776 | 0.772 | 0.507 | 1.42E-78  | 7 ADAM10     |
| 5.26E-126 | 0.592543283 | 1     | 0.781 | 1.69E-121 | 7 CCSER1     |
| 1.45E-56  | 0.59036279  | 0.599 | 0.367 | 4.65E-52  | 7 CLCN3      |
| 1.14E-113 | 0.586702975 | 0.861 | 0.545 | 3.67E-109 | 7 KIF13B     |
| 2.19E-118 | 0.586060893 | 0.557 | 0.246 | 7.02E-114 | 7 AC022414.1 |
| 2.04E-114 | 0.586017475 | 0.958 | 0.677 | 6.57E-110 | 7 AGLB4      |
| 4.75E-233 | 0.582461132 | 0.338 | 0.07  | 1.52E-228 | 7 TRIB1      |
| 1.60E-65  | 0.581282413 | 0.906 | 0.689 | 5.15E-61  | 7 TEAD1      |
| 9.63E-101 | 0.58084903  | 0.81  | 0.492 | 3.09E-96  | 7 TANC2      |
| 2.44E-102 | 0.5799207   | 0.489 | 0.218 | 7.84E-98  | 7 EGLN3      |
| 3.19E-115 | 0.576366127 | 0.536 | 0.242 | 1.02E-110 | 7 ELOVL5     |
| 2.23E-67  | 0.575430931 | 0.837 | 0.585 | 7.17E-63  | 7 TCF7L2     |
| 1.35E-133 | 0.575151307 | 0.298 | 0.085 | 4.32E-129 | 7 TGIF1      |
| 7.25E-104 | 0.57435446  | 0.806 | 0.503 | 2.33E-99  | 7 MAP2K4     |
| 1.10E-128 | 0.574328255 | 0.493 | 0.189 | 3.52E-124 | 7 RERGL      |
| 1.75E-131 | 0.571682065 | 0.595 | 0.267 | 5.62E-127 | 7 PKM        |
| 2.91E-98  | 0.569409893 | 0.919 | 0.66  | 9.36E-94  | 7 AAK1       |
| 5.07E-74  | 0.56913544  | 0.697 | 0.428 | 1.63E-69  | 7 SEPTIN11   |
| 1.57E-222 | 0.567903354 | 0.331 | 0.069 | 5.06E-218 | 7 SQLE       |
| 1.18E-88  | 0.567716013 | 0.698 | 0.408 | 3.78E-84  | 7 STXBP4     |
| 4.35E-58  | 0.567564098 | 0.489 | 0.274 | 1.40E-53  | 7 DNMBP      |
| 1.73E-92  | 0.566874342 | 0.967 | 0.768 | 5.56E-88  | 7 FNDC3B     |
| 5.06E-93  | 0.566701313 | 0.774 | 0.48  | 1.63E-88  | 7 ATF6       |
| 1.52E-108 | 0.566200968 | 0.816 | 0.503 | 4.90E-104 | 7 DNAJC1     |
| 2.20E-127 | 0.565983445 | 0.748 | 0.388 | 7.06E-123 | 7 VPS37B     |
| 2.20E-115 | 0.565337411 | 0.379 | 0.134 | 7.06E-111 | 7 LHX1       |
| 1.49E-63  | 0.564772621 | 0.351 | 0.162 | 4.77E-59  | 7 COL4A6     |
| 1.73E-104 | 0.561312887 | 0.516 | 0.24  | 5.54E-100 | 7 HABP4      |
| 3.15E-73  | 0.560758004 | 0.828 | 0.583 | 1.01E-68  | 7 DAB1       |
| 2.24E-86  | 0.559414963 | 0.764 | 0.474 | 7.20E-82  | 7 MAN2A1     |
| 4.24E-87  | 0.558829098 | 0.49  | 0.247 | 1.36E-82  | 7 PRMT3      |

|           |             |       |       |           |              |
|-----------|-------------|-------|-------|-----------|--------------|
| 3.79E-92  | 0.558771108 | 0.253 | 0.08  | 1.22E-87  | 7 AC026167.1 |
| 1.97E-89  | 0.558151203 | 0.73  | 0.404 | 6.32E-85  | 7 COL4A5     |
| 5.64E-99  | 0.5566323   | 0.497 | 0.227 | 1.81E-94  | 7 LIN7A      |
| 4.29E-71  | 0.556223933 | 0.732 | 0.473 | 1.38E-66  | 7 RAI14      |
| 4.52E-53  | 0.556049279 | 0.649 | 0.407 | 1.45E-48  | 7 BACH2      |
| 5.17E-103 | 0.554625229 | 0.81  | 0.491 | 1.66E-98  | 7 ABCD3      |
| 5.89E-115 | 0.550346897 | 0.826 | 0.506 | 1.89E-110 | 7 NCKAP1     |
| 1.27E-66  | 0.550300837 | 0.49  | 0.258 | 4.07E-62  | 7 SH3GL2     |
| 1.97E-84  | 0.550068385 | 0.65  | 0.361 | 6.31E-80  | 7 BCAR3      |
| 7.91E-55  | 0.549602317 | 0.759 | 0.525 | 2.54E-50  | 7 MRPL33     |
| 6.72E-93  | 0.547110905 | 0.944 | 0.704 | 2.16E-88  | 7 ADK        |
| 3.98E-96  | 0.546888353 | 0.524 | 0.255 | 1.28E-91  | 7 ADAM9      |
| 3.84E-49  | 0.54610899  | 0.682 | 0.462 | 1.23E-44  | 7 IGF2BP2    |
| 2.03E-69  | 0.54515817  | 0.83  | 0.584 | 6.52E-65  | 7 AHCYL2     |
| 9.16E-152 | 0.543660145 | 0.433 | 0.147 | 2.94E-147 | 7 CXXC5      |
| 3.20E-85  | 0.540078877 | 0.872 | 0.602 | 1.03E-80  | 7 SIPA1L1    |
| 2.85E-79  | 0.540061951 | 0.443 | 0.207 | 9.15E-75  | 7 TFRC       |
| 3.62E-120 | 0.53989925  | 0.627 | 0.29  | 1.16E-115 | 7 SUSD1      |
| 7.97E-49  | 0.537182923 | 0.778 | 0.537 | 2.56E-44  | 7 DAPK1      |
| 7.15E-155 | 0.537137776 | 0.37  | 0.111 | 2.30E-150 | 7 CSRP1      |
| 3.10E-137 | 0.535402209 | 0.52  | 0.207 | 9.94E-133 | 7 HK1        |
| 9.76E-63  | 0.533868815 | 0.841 | 0.6   | 3.13E-58  | 7 KLF12      |
| 7.75E-84  | 0.533015618 | 0.893 | 0.611 | 2.49E-79  | 7 ANKRD28    |
| 2.44E-152 | 0.530886078 | 0.466 | 0.159 | 7.82E-148 | 7 PLPP4      |
| 8.16E-62  | 0.529245431 | 0.395 | 0.196 | 2.62E-57  | 7 ATP2B4     |
| 3.37E-94  | 0.52895209  | 0.681 | 0.371 | 1.08E-89  | 7 CARMIL1    |
| 1.83E-95  | 0.528846654 | 0.857 | 0.548 | 5.88E-91  | 7 MAP7       |
| 9.34E-85  | 0.527922827 | 0.442 | 0.207 | 3.00E-80  | 7 STAM       |
| 1.93E-46  | 0.526531242 | 0.314 | 0.16  | 6.20E-42  | 7 H3-3B      |
| 5.57E-98  | 0.526447058 | 0.938 | 0.682 | 1.79E-93  | 7 TRAPPC9    |
| 4.44E-94  | 0.525175772 | 0.86  | 0.557 | 1.43E-89  | 7 FBXW11     |
| 3.30E-19  | 0.524257673 | 0.287 | 0.19  | 1.06E-14  | 7 MIR646HG   |
| 1.03E-82  | 0.523592783 | 0.982 | 0.871 | 3.32E-78  | 7 AL136164.2 |
| 4.25E-104 | 0.522410602 | 0.956 | 0.772 | 1.37E-99  | 7 KMT2C      |
| 3.04E-96  | 0.519270784 | 0.796 | 0.474 | 9.76E-92  | 7 MTUS1      |
| 9.53E-102 | 0.518620861 | 0.421 | 0.17  | 3.06E-97  | 7 HLF        |
| 4.18E-170 | 0.516923667 | 0.474 | 0.153 | 1.34E-165 | 7 NIPAL1     |
| 3.06E-183 | 0.516405426 | 0.451 | 0.137 | 9.81E-179 | 7 GYG2P1     |
| 8.28E-22  | 0.515942697 | 0.313 | 0.202 | 2.66E-17  | 7 SEMA3B     |
| 3.41E-95  | 0.514494392 | 0.678 | 0.378 | 1.10E-90  | 7 RNF149     |
| 1.94E-128 | 0.51218689  | 0.567 | 0.252 | 6.23E-124 | 7 PLEKHB2    |
| 1.59E-92  | 0.511465148 | 0.459 | 0.199 | 5.10E-88  | 7 REPS2      |
| 5.27E-120 | 0.510890508 | 0.879 | 0.448 | 1.69E-115 | 7 UTY        |
| 3.13E-157 | 0.510542946 | 0.43  | 0.137 | 1.01E-152 | 7 AMOTL1     |
| 1.64E-176 | 0.508768938 | 0.423 | 0.127 | 5.27E-172 | 7 PTP4A2     |
| 1.53E-146 | 0.508510218 | 0.831 | 0.426 | 4.92E-142 | 7 C11orf80   |
| 1.52E-131 | 0.508407903 | 0.48  | 0.188 | 4.89E-127 | 7 EPCAM      |
| 1.85E-112 | 0.507572416 | 0.468 | 0.194 | 5.95E-108 | 7 OPRM1      |
| 1.76E-83  | 0.507398901 | 0.857 | 0.585 | 5.66E-79  | 7 KTN1       |
| 9.32E-189 | 0.507141019 | 0.334 | 0.079 | 2.99E-184 | 7 MMP13      |
| 1.76E-84  | 0.506449034 | 0.891 | 0.633 | 5.64E-80  | 7 ARIH1      |

|           |             |       |       |           |              |
|-----------|-------------|-------|-------|-----------|--------------|
| 4.04E-100 | 0.505618941 | 0.752 | 0.427 | 1.30E-95  | 7 IQGAP1     |
| 1.42E-140 | 0.505170051 | 0.502 | 0.183 | 4.55E-136 | 7 LINC01788  |
| 5.79E-100 | 0.504645258 | 0.295 | 0.099 | 1.86E-95  | 7 DDIT3      |
| 8.25E-64  | 0.504544856 | 0.938 | 0.736 | 2.65E-59  | 7 ATXN1      |
| 7.33E-81  | 0.500444633 | 0.563 | 0.301 | 2.36E-76  | 7 PAK1       |
| 3.04E-120 | 0.499973776 | 0.496 | 0.208 | 9.76E-116 | 7 LRRC8B     |
| 1.48E-73  | 0.499224314 | 0.474 | 0.234 | 4.76E-69  | 7 CPVL       |
| 8.73E-75  | 0.49890924  | 0.938 | 0.739 | 2.80E-70  | 7 FBXL17     |
| 8.61E-83  | 0.498888005 | 0.921 | 0.709 | 2.77E-78  | 7 EXOC6B     |
| 2.79E-79  | 0.498300018 | 0.45  | 0.215 | 8.98E-75  | 7 TPD52L1    |
| 6.09E-61  | 0.498019889 | 0.676 | 0.431 | 1.96E-56  | 7 AC013394.1 |
| 2.31E-88  | 0.4975561   | 0.779 | 0.481 | 7.42E-84  | 7 DOCK7      |
| 2.27E-94  | 0.49740023  | 0.367 | 0.145 | 7.29E-90  | 7 ZFP36L2    |
| 1.88E-66  | 0.497289945 | 0.737 | 0.454 | 6.03E-62  | 7 FLNB       |
| 7.37E-84  | 0.494718315 | 0.773 | 0.489 | 2.37E-79  | 7 PPP2R5E    |
| 2.45E-65  | 0.493703883 | 0.712 | 0.433 | 7.86E-61  | 7 FAT1       |
| 4.26E-100 | 0.492689686 | 0.744 | 0.398 | 1.37E-95  | 7 FAM171A1   |
| 3.60E-87  | 0.492247802 | 0.497 | 0.247 | 1.16E-82  | 7 WDR43      |
| 8.19E-98  | 0.491420752 | 0.589 | 0.302 | 2.63E-93  | 7 AAGAB      |
| 1.05E-95  | 0.49119486  | 0.92  | 0.595 | 3.38E-91  | 7 TRPM3      |
| 9.41E-66  | 0.491119733 | 0.481 | 0.25  | 3.02E-61  | 7 PDE3B      |
| 8.68E-75  | 0.488549935 | 0.56  | 0.305 | 2.79E-70  | 7 RPS6KA6    |
| 1.48E-123 | 0.487688017 | 0.511 | 0.204 | 4.76E-119 | 7 B4GALNT3   |
| 4.81E-120 | 0.487415167 | 0.521 | 0.223 | 1.55E-115 | 7 RAI1       |
| 2.54E-145 | 0.487385058 | 0.371 | 0.11  | 8.16E-141 | 7 SLC9A4     |
| 3.50E-59  | 0.487013092 | 0.826 | 0.596 | 1.12E-54  | 7 AP000311.1 |
| 8.54E-120 | 0.486909189 | 0.341 | 0.114 | 2.74E-115 | 7 TBC1D7     |
| 1.94E-214 | 0.485820334 | 0.349 | 0.078 | 6.23E-210 | 7 AC138965.1 |
| 3.31E-280 | 0.485166026 | 0.262 | 0.035 | 1.06E-275 | 7 RASSF9     |
| 1.70E-72  | 0.483938713 | 0.677 | 0.407 | 5.47E-68  | 7 RASA2      |
| 1.54E-62  | 0.482139639 | 0.821 | 0.562 | 4.95E-58  | 7 FAM160A1   |
| 6.06E-90  | 0.481501226 | 0.72  | 0.422 | 1.95E-85  | 7 RAB6A      |
| 9.72E-77  | 0.481206415 | 0.908 | 0.663 | 3.12E-72  | 7 DYRK1A     |
| 3.21E-86  | 0.481119516 | 0.98  | 0.813 | 1.03E-81  | 7 ARID1B     |
| 1.99E-149 | 0.480157749 | 0.445 | 0.151 | 6.38E-145 | 7 RASGRP1    |
| 3.86E-97  | 0.478149058 | 0.763 | 0.452 | 1.24E-92  | 7 RNGTT      |
| 1.77E-68  | 0.477132068 | 0.982 | 0.86  | 5.68E-64  | 7 ANK3       |
| 7.70E-78  | 0.477070232 | 0.704 | 0.399 | 2.47E-73  | 7 ARHGEF38   |
| 1.83E-88  | 0.476250488 | 0.847 | 0.524 | 5.87E-84  | 7 STAT3      |
| 2.88E-13  | 0.476027832 | 0.736 | 0.598 | 9.23E-09  | 7 IGFBP7     |
| 3.95E-90  | 0.475686649 | 0.861 | 0.57  | 1.27E-85  | 7 NPEPPS     |
| 5.05E-30  | 0.475381989 | 0.744 | 0.584 | 1.62E-25  | 7 PDE7B      |
| 2.07E-103 | 0.475265535 | 0.567 | 0.274 | 6.66E-99  | 7 FP236241.1 |
| 6.82E-73  | 0.473780201 | 0.918 | 0.681 | 2.19E-68  | 7 GNAQ       |
| 9.52E-56  | 0.47377298  | 0.655 | 0.402 | 3.06E-51  | 7 EZR        |
| 9.39E-65  | 0.473344695 | 0.849 | 0.574 | 3.02E-60  | 7 TRHDE      |
| 5.50E-111 | 0.473268869 | 0.447 | 0.183 | 1.77E-106 | 7 FDX1       |
| 2.92E-60  | 0.472496969 | 0.946 | 0.777 | 9.37E-56  | 7 BCAS3      |
| 1.08E-84  | 0.472372376 | 0.472 | 0.22  | 3.46E-80  | 7 ARSJ       |
| 1.77E-38  | 0.47192359  | 0.357 | 0.199 | 5.70E-34  | 7 PXYLP1     |
| 2.02E-143 | 0.471740747 | 0.522 | 0.204 | 6.50E-139 | 7 WDR1       |

|           |             |       |       |           |               |
|-----------|-------------|-------|-------|-----------|---------------|
| 3.08E-85  | 0.471690256 | 0.785 | 0.485 | 9.90E-81  | 7 PSME4       |
| 6.15E-123 | 0.471168993 | 0.301 | 0.087 | 1.98E-118 | 7 HES1        |
| 1.56E-104 | 0.470974121 | 0.661 | 0.316 | 5.02E-100 | 7 AC040174.1  |
| 2.08E-118 | 0.470230198 | 0.641 | 0.303 | 6.67E-114 | 7 DUSP1       |
| 1.41E-100 | 0.469947458 | 0.721 | 0.411 | 4.52E-96  | 7 NUP98       |
| 1.16E-90  | 0.469808188 | 0.744 | 0.434 | 3.74E-86  | 7 AGFG1       |
| 8.71E-73  | 0.469595862 | 0.463 | 0.236 | 2.80E-68  | 7 SCARB2      |
| 2.23E-55  | 0.468620189 | 0.878 | 0.654 | 7.16E-51  | 7 PTPN13      |
| 9.27E-62  | 0.46803499  | 0.571 | 0.335 | 2.98E-57  | 7 TRIM24      |
| 1.98E-76  | 0.468011231 | 0.867 | 0.59  | 6.36E-72  | 7 CAMTA1      |
| 6.71E-71  | 0.467331445 | 0.769 | 0.508 | 2.15E-66  | 7 FBXW7       |
| 1.78E-60  | 0.466941718 | 0.413 | 0.215 | 5.73E-56  | 7 LRRC1       |
| 5.88E-74  | 0.466908377 | 0.671 | 0.4   | 1.89E-69  | 7 MPRIP       |
| 2.87E-112 | 0.466508237 | 0.6   | 0.263 | 9.21E-108 | 7 CACNB4      |
| 2.75E-86  | 0.464219375 | 0.906 | 0.618 | 8.83E-82  | 7 TBC1D1      |
| 2.34E-131 | 0.463920864 | 0.383 | 0.125 | 7.50E-127 | 7 AL512506.3  |
| 5.60E-101 | 0.46377069  | 0.644 | 0.313 | 1.80E-96  | 7 ZNF98       |
| 7.68E-55  | 0.462258958 | 0.598 | 0.369 | 2.47E-50  | 7 ANO6        |
| 1.79E-61  | 0.461725634 | 0.915 | 0.698 | 5.73E-57  | 7 MAPK8       |
| 1.55E-72  | 0.461628306 | 0.961 | 0.782 | 4.99E-68  | 7 PTK2        |
| 9.05E-109 | 0.461310314 | 0.592 | 0.285 | 2.91E-104 | 7 ARFGAP3     |
| 1.50E-66  | 0.461084926 | 0.802 | 0.551 | 4.82E-62  | 7 UVRAG       |
| 3.38E-55  | 0.459335195 | 0.722 | 0.478 | 1.08E-50  | 7 FAM135A     |
| 3.05E-196 | 0.459317039 | 0.36  | 0.088 | 9.79E-192 | 7 BHLHE40-AS1 |
| 4.80E-88  | 0.458530438 | 0.471 | 0.218 | 1.54E-83  | 7 BAIAP2L1    |
| 8.47E-84  | 0.458266019 | 0.631 | 0.352 | 2.72E-79  | 7 UBE2G1      |
| 2.61E-99  | 0.457499584 | 0.686 | 0.348 | 8.39E-95  | 7 GRHL2       |
| 1.07E-111 | 0.457483006 | 0.38  | 0.139 | 3.44E-107 | 7 EHD4        |
| 7.25E-70  | 0.456889574 | 0.713 | 0.439 | 2.33E-65  | 7 YWHAZ       |
| 1.55E-82  | 0.456824222 | 0.788 | 0.443 | 4.97E-78  | 7 STK39       |
| 4.84E-90  | 0.456543687 | 0.763 | 0.453 | 1.55E-85  | 7 CDC42BPB    |
| 2.33E-64  | 0.456349207 | 0.622 | 0.376 | 7.48E-60  | 7 MINDY2      |
| 3.85E-84  | 0.456031789 | 0.806 | 0.499 | 1.24E-79  | 7 OGT         |
| 4.03E-48  | 0.455984094 | 0.25  | 0.11  | 1.29E-43  | 7 AL355499.1  |
| 5.98E-64  | 0.454003734 | 0.834 | 0.566 | 1.92E-59  | 7 STRN3       |
| 2.03E-140 | 0.453728642 | 0.505 | 0.19  | 6.51E-136 | 7 SLC25A29    |
| 6.80E-124 | 0.453279432 | 0.436 | 0.164 | 2.18E-119 | 7 DOP1B       |
| 1.01E-69  | 0.451406334 | 0.837 | 0.571 | 3.23E-65  | 7 RAB10       |
| 5.20E-51  | 0.449706323 | 0.863 | 0.624 | 1.67E-46  | 7 AL138752.2  |
| 1.79E-62  | 0.449159208 | 0.551 | 0.321 | 5.74E-58  | 7 SLC10A7     |
| 1.93E-70  | 0.448920659 | 0.751 | 0.477 | 6.19E-66  | 7 SNX9        |
| 8.49E-71  | 0.44880838  | 0.785 | 0.504 | 2.73E-66  | 7 AC068205.2  |
| 5.47E-87  | 0.447755535 | 0.517 | 0.244 | 1.76E-82  | 7 MTHFD1L     |
| 1.37E-87  | 0.44759825  | 0.444 | 0.203 | 4.39E-83  | 7 ENO1        |
| 1.48E-130 | 0.447102963 | 0.425 | 0.154 | 4.77E-126 | 7 MIR22HG     |
| 1.28E-43  | 0.445969637 | 0.476 | 0.287 | 4.12E-39  | 7 SLC19A2     |
| 6.57E-56  | 0.444737728 | 0.728 | 0.482 | 2.11E-51  | 7 FERMT2      |
| 6.75E-68  | 0.443873035 | 0.831 | 0.56  | 2.17E-63  | 7 SSH2        |
| 4.77E-79  | 0.443153263 | 0.569 | 0.305 | 1.53E-74  | 7 RHEB        |
| 4.40E-28  | 0.440829333 | 0.272 | 0.155 | 1.41E-23  | 7 CHMP1B2P    |
| 5.68E-77  | 0.440778662 | 0.972 | 0.753 | 1.83E-72  | 7 PPP2R3A     |

|           |             |       |       |           |              |
|-----------|-------------|-------|-------|-----------|--------------|
| 1.55E-30  | 0.439491742 | 0.697 | 0.488 | 4.97E-26  | 7 PAWR       |
| 9.40E-268 | 0.438191669 | 0.272 | 0.04  | 3.02E-263 | 7 NAB2       |
| 2.99E-69  | 0.437936824 | 0.573 | 0.309 | 9.59E-65  | 7 MACC1      |
| 8.46E-72  | 0.437850684 | 0.815 | 0.531 | 2.72E-67  | 7 CBFA2T2    |
| 3.85E-66  | 0.43730678  | 0.631 | 0.37  | 1.24E-61  | 7 AC004160.1 |
| 3.04E-65  | 0.436533181 | 0.806 | 0.535 | 9.76E-61  | 7 ROCK2      |
| 8.57E-91  | 0.435907182 | 0.657 | 0.354 | 2.75E-86  | 7 PITPNB     |
| 3.77E-77  | 0.434183111 | 0.769 | 0.48  | 1.21E-72  | 7 GNB1       |
| 2.23E-77  | 0.433554155 | 0.65  | 0.373 | 7.17E-73  | 7 CBFB       |
| 1.32E-58  | 0.431634896 | 0.557 | 0.317 | 4.24E-54  | 7 Tmprss2    |
| 8.91E-68  | 0.431426503 | 0.785 | 0.51  | 2.86E-63  | 7 OPHN1      |
| 4.91E-153 | 0.430980268 | 0.379 | 0.111 | 1.58E-148 | 7 AFAP1L2    |
| 2.20E-61  | 0.430100514 | 0.588 | 0.345 | 7.05E-57  | 7 BCR        |
| 1.22E-81  | 0.429964626 | 0.847 | 0.555 | 3.92E-77  | 7 UBE2K      |
| 2.48E-70  | 0.428177307 | 0.829 | 0.558 | 7.98E-66  | 7 TLK1       |
| 3.91E-60  | 0.427720822 | 0.783 | 0.526 | 1.26E-55  | 7 ZHX2       |
| 2.97E-94  | 0.427339801 | 0.806 | 0.477 | 9.54E-90  | 7 SDHAP1     |
| 5.54E-28  | 0.427288366 | 0.839 | 0.656 | 1.78E-23  | 7 PAX8-AS1   |
| 7.83E-75  | 0.426283808 | 0.762 | 0.478 | 2.51E-70  | 7 PPP2R2A    |
| 6.74E-84  | 0.424629479 | 0.665 | 0.373 | 2.17E-79  | 7 CAAP1      |
| 8.93E-46  | 0.421588078 | 0.657 | 0.425 | 2.87E-41  | 7 KCNJ3      |
| 9.79E-65  | 0.420705373 | 0.409 | 0.196 | 3.14E-60  | 7 FSTL4      |
| 8.98E-91  | 0.41947514  | 0.27  | 0.09  | 2.88E-86  | 7 KRT8       |
| 9.75E-109 | 0.419135277 | 0.287 | 0.089 | 3.13E-104 | 7 AC007255.1 |
| 4.89E-92  | 0.418004291 | 0.461 | 0.207 | 1.57E-87  | 7 NF2        |
| 1.44E-79  | 0.417868115 | 0.788 | 0.472 | 4.63E-75  | 7 SLIT2      |
| 2.79E-100 | 0.41784949  | 0.361 | 0.133 | 8.96E-96  | 7 LIPH       |
| 1.13E-92  | 0.417240708 | 0.626 | 0.328 | 3.64E-88  | 7 AGO2       |
| 1.11E-64  | 0.416182185 | 0.602 | 0.345 | 3.55E-60  | 7 EMX2OS     |
| 1.75E-66  | 0.415522547 | 0.824 | 0.567 | 5.63E-62  | 7 NUTM2B-AS1 |
| 1.83E-157 | 0.415122056 | 0.256 | 0.056 | 5.88E-153 | 7 RARA       |
| 3.80E-65  | 0.414113821 | 0.761 | 0.49  | 1.22E-60  | 7 PTPN3      |
| 2.28E-88  | 0.412581226 | 0.749 | 0.435 | 7.32E-84  | 7 CPSF6      |
| 3.11E-49  | 0.411868063 | 0.876 | 0.64  | 9.99E-45  | 7 PTPRK      |
| 2.00E-75  | 0.410528885 | 0.913 | 0.642 | 6.44E-71  | 7 PRKCE      |
| 1.02E-55  | 0.410192726 | 0.915 | 0.705 | 3.26E-51  | 7 NCOA2      |
| 2.75E-64  | 0.409203304 | 0.612 | 0.361 | 8.83E-60  | 7 USP12      |
| 4.29E-76  | 0.407661772 | 0.74  | 0.44  | 1.38E-71  | 7 ARHGEF10L  |
| 4.76E-64  | 0.407240397 | 0.533 | 0.298 | 1.53E-59  | 7 DENND5A    |
| 5.21E-45  | 0.407093119 | 0.671 | 0.451 | 1.67E-40  | 7 SNX24      |
| 2.75E-83  | 0.40600674  | 0.302 | 0.111 | 8.84E-79  | 7 TIMP3      |
| 4.73E-75  | 0.405098446 | 0.781 | 0.483 | 1.52E-70  | 7 ETNK1      |
| 2.40E-73  | 0.404564043 | 0.74  | 0.455 | 7.70E-69  | 7 AC022826.2 |
| 2.49E-94  | 0.403549979 | 0.533 | 0.24  | 8.01E-90  | 7 AC068547.1 |
| 3.89E-25  | 0.403235173 | 0.707 | 0.54  | 1.25E-20  | 7 BCL2       |
| 2.02E-67  | 0.402849917 | 0.865 | 0.579 | 6.48E-63  | 7 ANKRD10    |
| 3.76E-170 | 0.40039218  | 0.461 | 0.141 | 1.21E-165 | 7 TBX2       |
| 2.21E-77  | 0.399573219 | 0.652 | 0.379 | 7.10E-73  | 7 RLF        |
| 4.60E-104 | 0.399488432 | 0.349 | 0.125 | 1.48E-99  | 7 ZNF100     |
| 2.05E-70  | 0.399464129 | 0.701 | 0.424 | 6.60E-66  | 7 RAP1A      |
| 4.83E-71  | 0.399410368 | 0.613 | 0.345 | 1.55E-66  | 7 ZNF10      |

|           |             |       |       |           |              |
|-----------|-------------|-------|-------|-----------|--------------|
| 4.16E-109 | 0.398990328 | 1     | 0.961 | 1.34E-104 | 7 NEAT1      |
| 3.89E-71  | 0.398437247 | 0.728 | 0.451 | 1.25E-66  | 7 SEC24B     |
| 2.38E-103 | 0.398275115 | 0.661 | 0.328 | 7.64E-99  | 7 MROH7      |
| 5.72E-147 | 0.398262551 | 0.283 | 0.07  | 1.84E-142 | 7 AC020916.1 |
| 4.44E-52  | 0.397042413 | 0.963 | 0.775 | 1.42E-47  | 7 FGD4       |
| 2.32E-63  | 0.396925211 | 0.336 | 0.147 | 7.44E-59  | 7 EGR1       |
| 1.12E-70  | 0.396652843 | 0.635 | 0.371 | 3.61E-66  | 7 IBTK       |
| 2.54E-82  | 0.3962694   | 0.603 | 0.325 | 8.16E-78  | 7 GSPT1      |
| 1.65E-20  | 0.394422986 | 0.523 | 0.389 | 5.28E-16  | 7 FGF13      |
| 6.97E-82  | 0.394370849 | 0.732 | 0.431 | 2.24E-77  | 7 AC132008.2 |
| 9.78E-70  | 0.393325528 | 0.434 | 0.212 | 3.14E-65  | 7 PDE5A      |
| 1.62E-55  | 0.393179454 | 0.757 | 0.515 | 5.20E-51  | 7 PIP5K1A    |
| 3.56E-86  | 0.392981722 | 0.505 | 0.24  | 1.14E-81  | 7 ATP9A      |
| 3.39E-81  | 0.392955555 | 0.618 | 0.334 | 1.09E-76  | 7 CRTC3      |
| 2.51E-176 | 0.392789662 | 1     | 1     | 8.05E-172 | 7 MALAT1     |
| 1.04E-42  | 0.392786167 | 0.645 | 0.426 | 3.33E-38  | 7 ARHGAP21   |
| 6.32E-54  | 0.392172656 | 0.874 | 0.642 | 2.03E-49  | 7 ZMYM2      |
| 8.63E-74  | 0.391944362 | 0.456 | 0.218 | 2.77E-69  | 7 RNF24      |
| 0         | 0.387196465 | 0.269 | 0.022 | 0         | 7 LINC01099  |
| 1.39E-68  | 0.386976712 | 0.816 | 0.537 | 4.47E-64  | 7 SND1       |
| 1.88E-65  | 0.386401302 | 0.426 | 0.206 | 6.03E-61  | 7 FAM83B     |
| 6.88E-125 | 0.385446503 | 0.376 | 0.126 | 2.21E-120 | 7 ARSDP1     |
| 1.91E-53  | 0.385381169 | 0.914 | 0.722 | 6.12E-49  | 7 STAG1      |
| 1.48E-59  | 0.385321095 | 0.821 | 0.559 | 4.74E-55  | 7 LARP4B     |
| 1.67E-68  | 0.384469708 | 0.613 | 0.351 | 5.35E-64  | 7 CNN3       |
| 1.94E-61  | 0.384147262 | 0.798 | 0.538 | 6.23E-57  | 7 NUTM2A-AS1 |
| 1.36E-108 | 0.384066084 | 0.909 | 0.554 | 4.35E-104 | 7 NEBL       |
| 2.14E-66  | 0.383630607 | 0.619 | 0.358 | 6.88E-62  | 7 ZBTB38     |
| 2.20E-75  | 0.38302019  | 0.536 | 0.271 | 7.08E-71  | 7 PLEKHA2    |
| 8.01E-120 | 0.383007017 | 0.366 | 0.125 | 2.57E-115 | 7 CYP51A1    |
| 1.54E-49  | 0.382886316 | 0.295 | 0.14  | 4.96E-45  | 7 PLS1       |
| 3.99E-64  | 0.382190876 | 0.891 | 0.63  | 1.28E-59  | 7 CSNK1A1    |
| 1.47E-69  | 0.382142472 | 0.702 | 0.395 | 4.72E-65  | 7 TTTY14     |
| 5.55E-49  | 0.380752426 | 0.564 | 0.343 | 1.78E-44  | 7 FBXL2      |
| 5.84E-63  | 0.380302789 | 0.913 | 0.69  | 1.88E-58  | 7 PPP6R3     |
| 7.30E-67  | 0.380100514 | 0.594 | 0.339 | 2.34E-62  | 7 ADIPOR2    |
| 1.46E-57  | 0.380080256 | 0.37  | 0.184 | 4.70E-53  | 7 FDFT1      |
| 2.96E-92  | 0.380024993 | 0.481 | 0.209 | 9.51E-88  | 7 NR4A1      |
| 6.39E-102 | 0.380023887 | 0.462 | 0.2   | 2.05E-97  | 7 RNF114     |
| 3.99E-58  | 0.379938638 | 0.869 | 0.622 | 1.28E-53  | 7 MARK3      |
| 1.67E-52  | 0.379112214 | 0.806 | 0.56  | 5.35E-48  | 7 SPPL3      |
| 4.90E-58  | 0.378423056 | 0.775 | 0.519 | 1.57E-53  | 7 UBAC2      |
| 6.66E-74  | 0.375484608 | 0.662 | 0.385 | 2.14E-69  | 7 PSMD1      |
| 1.36E-80  | 0.375297345 | 0.544 | 0.276 | 4.37E-76  | 7 AC139769.1 |
| 1.13E-161 | 0.374057936 | 0.313 | 0.079 | 3.64E-157 | 7 RAB11FIP5  |
| 1.64E-124 | 0.373988301 | 0.536 | 0.222 | 5.27E-120 | 7 MAP1LC3A   |
| 1.29E-50  | 0.373686617 | 0.522 | 0.307 | 4.13E-46  | 7 RPS6KA3    |
| 3.97E-72  | 0.37359857  | 0.535 | 0.277 | 1.28E-67  | 7 ADAM22     |
| 3.16E-72  | 0.372916306 | 0.651 | 0.367 | 1.02E-67  | 7 MYO5B      |
| 3.84E-50  | 0.372341705 | 0.62  | 0.385 | 1.23E-45  | 7 INTS6      |
| 4.69E-66  | 0.372074744 | 0.635 | 0.371 | 1.51E-61  | 7 MED27      |

|           |             |       |       |             |              |
|-----------|-------------|-------|-------|-------------|--------------|
| 1.21E-55  | 0.371160411 | 0.298 | 0.133 | 3.90E-51    | 7 GPR132     |
| 2.61E-61  | 0.37034271  | 0.774 | 0.505 | 8.37E-57    | 7 PSPC1      |
| 1.56E-88  | 0.369846699 | 0.494 | 0.23  | 5.01E-84    | 7 NPC1       |
| 4.24E-100 | 0.369827196 | 0.445 | 0.19  | 1.36E-95    | 7 RPE        |
| 3.20E-99  | 0.369150076 | 0.36  | 0.13  | 1.03E-94    | 7 RHCG       |
| 1.15E-85  | 0.36851801  | 0.543 | 0.274 | 3.69E-81    | 7 ARPC2      |
| 2.04E-20  | 0.368376013 | 0.355 | 0.24  | 6.54E-16    | 7 TDRP       |
| 5.07E-96  | 0.368292452 | 0.322 | 0.113 | 1.63E-91    | 7 SLC6A6     |
| 7.53E-12  | 0.36826974  | 0.308 | 0.226 | 2.42E-07    | 7 SOBP       |
| 3.48E-79  | 0.368167081 | 0.501 | 0.247 | 1.12E-74    | 7 IPO7       |
| 1.12E-54  | 0.367341952 | 0.851 | 0.609 | 3.59E-50    | 7 WAC        |
| 1.01E-75  | 0.3672531   | 0.436 | 0.202 | 3.23E-71    | 7 MYRFL      |
| 1.22E-74  | 0.366925424 | 0.337 | 0.142 | 3.93E-70    | 7 ZNF697     |
| 1.15E-53  | 0.36663647  | 0.85  | 0.607 | 3.69E-49    | 7 AHI1       |
| 8.98E-48  | 0.366205797 | 0.858 | 0.674 | 2.89E-43    | 7 WNK1       |
| 8.31E-50  | 0.365671522 | 0.735 | 0.49  | 2.67E-45    | 7 CCSER2     |
| 3.09E-57  | 0.36552493  | 0.804 | 0.533 | 9.93E-53    | 7 SLC25A13   |
| 1.09E-56  | 0.36521842  | 0.92  | 0.699 | 3.49E-52    | 7 ERC1       |
| 3.35E-49  | 0.36429724  | 0.765 | 0.516 | 1.07E-44    | 7 ARHGAP32   |
| 8.79E-60  | 0.363622559 | 0.691 | 0.432 | 2.82E-55    | 7 OLA1       |
| 8.81E-133 | 0.36360652  | 0.672 | 0.274 | 2.83E-128   | 7 TMEM52B    |
| 1.66E-73  | 0.363569065 | 0.763 | 0.459 | 5.33E-69    | 7 HOXD3      |
| 4.71E-61  | 0.362939074 | 0.728 | 0.467 | 1.51E-56    | 7 MARCHF7    |
| 2.71E-91  | 0.362934209 | 0.413 | 0.177 | 8.70E-87    | 7 INSIG2     |
| 5.63E-132 | 0.362222329 | 0.505 | 0.183 | 1.81E-127   | 7 GATA3      |
| 3.06E-152 | 0.361855713 | 0.31  | 0.08  | 9.83E-148   | 7 AC004594.1 |
| 2.47E-66  | 0.361697855 | 0.545 | 0.299 | 7.94E-62    | 7 NDFIP2     |
| 6.58E-85  | 0.361044326 | 0.264 | 0.09  | 2.11E-80    | 7 PPL        |
| 4.97E-81  | 0.360647141 | 0.55  | 0.281 | 1.60E-76    | 7 CMC2       |
| 5.06E-87  | 0.360566321 | 0.365 | 0.149 | 1.62E-82    | 7 MBIP       |
| 4.81E-06  | 0.360314541 | 0.511 | 0.459 | 0.154583685 | 7 TXNIP      |
| 2.00E-23  | 0.360091644 | 0.365 | 0.235 | 6.42E-19    | 7 LINGO2     |
| 8.75E-51  | 0.359482407 | 0.793 | 0.537 | 2.81E-46    | 7 PRICKLE2   |
| 2.62E-82  | 0.359395023 | 0.386 | 0.162 | 8.42E-78    | 7 LHFPL3-AS2 |
| 2.72E-59  | 0.359343813 | 0.843 | 0.578 | 8.74E-55    | 7 RAPGEF6    |
| 1.46E-75  | 0.359322807 | 0.451 | 0.213 | 4.69E-71    | 7 MAL2       |
| 3.51E-62  | 0.356595292 | 0.874 | 0.616 | 1.13E-57    | 7 VPS13D     |
| 1.13E-66  | 0.356437157 | 0.53  | 0.286 | 3.62E-62    | 7 KDM5B      |
| 5.62E-56  | 0.356020663 | 0.854 | 0.6   | 1.81E-51    | 7 TRIP12     |
| 1.69E-89  | 0.35556107  | 0.428 | 0.184 | 5.44E-85    | 7 GSR        |
| 1.17E-71  | 0.355433732 | 0.627 | 0.34  | 3.76E-67    | 7 SFXN5      |
| 1.55E-51  | 0.35526641  | 0.797 | 0.542 | 4.98E-47    | 7 SLMAP      |
| 6.65E-66  | 0.354876125 | 0.6   | 0.344 | 2.14E-61    | 7 PRKCI      |
| 7.60E-61  | 0.354220505 | 0.655 | 0.399 | 2.44E-56    | 7 NDUFS4     |
| 1.92E-125 | 0.354203731 | 0.479 | 0.185 | 6.17E-121   | 7 DPY19L2P1  |
| 2.36E-88  | 0.354048392 | 0.391 | 0.161 | 7.60E-84    | 7 AL136115.2 |
| 1.34E-148 | 0.353874534 | 0.285 | 0.07  | 4.29E-144   | 7 MOCOS      |
| 4.95E-68  | 0.353700227 | 0.64  | 0.371 | 1.59E-63    | 7 PTPN1      |
| 7.77E-113 | 0.352960796 | 0.319 | 0.102 | 2.49E-108   | 7 CWH43      |
| 1.67E-46  | 0.352900543 | 0.894 | 0.657 | 5.38E-42    | 7 SRPK2      |
| 3.86E-49  | 0.352574562 | 0.91  | 0.67  | 1.24E-44    | 7 HNRNPC     |



|           |             |       |       |           |              |
|-----------|-------------|-------|-------|-----------|--------------|
| 1.38E-68  | 0.352208148 | 0.598 | 0.334 | 4.44E-64  | 7 ACVR1B     |
| 6.19E-67  | 0.351956976 | 0.547 | 0.3   | 1.99E-62  | 7 CAPZA2     |
| 4.37E-18  | 0.351807459 | 0.259 | 0.161 | 1.40E-13  | 7 SGCD       |
| 2.07E-47  | 0.35125771  | 0.685 | 0.439 | 6.64E-43  | 7 PLEKHA1    |
| 3.60E-66  | 0.350842299 | 0.581 | 0.328 | 1.16E-61  | 7 NUDT3      |
| 2.59E-59  | 0.350841159 | 0.546 | 0.304 | 8.32E-55  | 7 MYOF       |
| 1.43E-47  | 0.349159484 | 0.512 | 0.306 | 4.59E-43  | 7 BCL9       |
| 7.69E-65  | 0.348908664 | 0.718 | 0.445 | 2.47E-60  | 7 CLTC       |
| 3.22E-62  | 0.347823541 | 0.598 | 0.347 | 1.04E-57  | 7 NUP153     |
| 9.21E-66  | 0.347586277 | 0.317 | 0.135 | 2.96E-61  | 7 ANXA3      |
| 1.37E-66  | 0.34746149  | 0.416 | 0.2   | 4.41E-62  | 7 CYTH3      |
| 1.09E-76  | 0.346941762 | 0.291 | 0.111 | 3.49E-72  | 7 SMAD7      |
| 1.09E-56  | 0.346736186 | 0.678 | 0.432 | 3.50E-52  | 7 TAB2       |
| 1.25E-50  | 0.345877112 | 0.754 | 0.5   | 4.02E-46  | 7 DENND1B    |
| 3.04E-68  | 0.345569402 | 0.581 | 0.326 | 9.76E-64  | 7 DYNC1I2    |
| 1.62E-59  | 0.344483151 | 0.539 | 0.301 | 5.20E-55  | 7 MICU3      |
| 3.45E-62  | 0.342972826 | 0.742 | 0.471 | 1.11E-57  | 7 XRCC5      |
| 1.28E-139 | 0.342762707 | 0.282 | 0.071 | 4.11E-135 | 7 TBX2-AS1   |
| 1.11E-64  | 0.3424379   | 0.387 | 0.185 | 3.57E-60  | 7 CCNYL1     |
| 1.17E-38  | 0.34225394  | 0.787 | 0.569 | 3.75E-34  | 7 SUPT3H     |
| 3.11E-65  | 0.342017684 | 0.65  | 0.375 | 9.97E-61  | 7 HNF1B      |
| 7.81E-22  | 0.339254679 | 0.723 | 0.558 | 2.51E-17  | 7 PAM        |
| 2.69E-40  | 0.339151664 | 0.668 | 0.45  | 8.64E-36  | 7 JAK1       |
| 3.60E-70  | 0.338564475 | 0.741 | 0.427 | 1.16E-65  | 7 KCNJ16     |
| 5.96E-59  | 0.338334452 | 0.539 | 0.306 | 1.91E-54  | 7 ERMP1      |
| 2.26E-57  | 0.337653181 | 0.624 | 0.376 | 7.24E-53  | 7 OXSR1      |
| 5.06E-11  | 0.336705442 | 0.353 | 0.254 | 1.63E-06  | 7 MGLL       |
| 1.18E-97  | 0.336381218 | 0.326 | 0.116 | 3.78E-93  | 7 BTG3       |
| 2.51E-32  | 0.335447792 | 0.889 | 0.677 | 8.07E-28  | 7 TRIO       |
| 1.42E-57  | 0.335306974 | 0.672 | 0.417 | 4.55E-53  | 7 ATP11B     |
| 3.43E-49  | 0.33449259  | 0.987 | 0.87  | 1.10E-44  | 7 LPP        |
| 3.09E-46  | 0.334479176 | 0.826 | 0.587 | 9.91E-42  | 7 RBFOX2     |
| 1.95E-45  | 0.334384971 | 0.92  | 0.704 | 6.27E-41  | 7 CDKAL1     |
| 2.92E-84  | 0.334055412 | 0.328 | 0.124 | 9.37E-80  | 7 JUNB       |
| 1.04E-60  | 0.332953573 | 0.59  | 0.346 | 3.35E-56  | 7 MAP3K7     |
| 2.45E-71  | 0.332532045 | 0.484 | 0.243 | 7.86E-67  | 7 MAPK6      |
| 1.44E-63  | 0.33239432  | 0.704 | 0.429 | 4.63E-59  | 7 UBR4       |
| 3.95E-31  | 0.330037197 | 0.46  | 0.288 | 1.27E-26  | 7 MAL        |
| 1.36E-51  | 0.329881594 | 0.878 | 0.638 | 4.38E-47  | 7 ARFGEF1    |
| 2.74E-58  | 0.329703258 | 0.355 | 0.168 | 8.81E-54  | 7 FAM169A    |
| 6.50E-69  | 0.329025685 | 0.729 | 0.44  | 2.09E-64  | 7 AP1G1      |
| 8.78E-69  | 0.328901826 | 0.626 | 0.354 | 2.82E-64  | 7 NPTN       |
| 1.30E-18  | 0.328627123 | 0.816 | 0.658 | 4.16E-14  | 7 TRPS1      |
| 2.96E-09  | 0.328509913 | 0.536 | 0.419 | 9.49E-05  | 7 PDK4       |
| 1.23E-76  | 0.328197737 | 0.514 | 0.258 | 3.94E-72  | 7 KPNB1      |
| 3.64E-61  | 0.327929964 | 0.701 | 0.42  | 1.17E-56  | 7 CMTM4      |
| 4.23E-65  | 0.327077427 | 0.613 | 0.353 | 1.36E-60  | 7 KPNA4      |
| 6.28E-54  | 0.326959228 | 0.872 | 0.614 | 2.02E-49  | 7 PAFAH1B1   |
| 3.02E-53  | 0.326628845 | 0.821 | 0.564 | 9.69E-49  | 7 AFF4       |
| 1.43E-77  | 0.325854371 | 0.49  | 0.243 | 4.58E-73  | 7 AC233699.1 |
| 7.88E-46  | 0.325675464 | 0.929 | 0.715 | 2.53E-41  | 7 NF1        |

|           |             |       |       |           |              |
|-----------|-------------|-------|-------|-----------|--------------|
| 9.38E-68  | 0.325659895 | 0.998 | 0.875 | 3.01E-63  | 7 ESRRG      |
| 3.17E-52  | 0.325463223 | 0.549 | 0.324 | 1.02E-47  | 7 ARL8B      |
| 1.24E-40  | 0.325442454 | 0.518 | 0.326 | 3.98E-36  | 7 ACVR2A     |
| 8.60E-30  | 0.32521802  | 0.694 | 0.482 | 2.76E-25  | 7 MFHAS1     |
| 1.81E-53  | 0.325104177 | 0.764 | 0.512 | 5.80E-49  | 7 CUL3       |
| 2.08E-59  | 0.324626399 | 0.443 | 0.232 | 6.69E-55  | 7 KRAS       |
| 5.13E-17  | 0.323101119 | 0.322 | 0.211 | 1.65E-12  | 7 GPR137B    |
| 3.19E-27  | 0.32286057  | 0.438 | 0.285 | 1.03E-22  | 7 LDHB       |
| 1.07E-55  | 0.322652972 | 0.598 | 0.362 | 3.45E-51  | 7 KCMF1      |
| 5.52E-35  | 0.322559162 | 0.642 | 0.44  | 1.77E-30  | 7 MTMR10     |
| 5.55E-61  | 0.322507168 | 0.712 | 0.442 | 1.78E-56  | 7 CNOT1      |
| 3.93E-62  | 0.321753295 | 0.392 | 0.191 | 1.26E-57  | 7 CBL        |
| 1.91E-67  | 0.321166469 | 0.715 | 0.428 | 6.12E-63  | 7 SF1        |
| 7.79E-45  | 0.319535754 | 0.904 | 0.661 | 2.50E-40  | 7 PDE8A      |
| 7.01E-53  | 0.319118753 | 0.799 | 0.535 | 2.25E-48  | 7 HUWE1      |
| 5.79E-33  | 0.318818787 | 0.851 | 0.638 | 1.86E-28  | 7 FNBP1L     |
| 1.89E-58  | 0.318403297 | 0.732 | 0.464 | 6.05E-54  | 7 RAB7A      |
| 2.09E-46  | 0.318229932 | 0.464 | 0.266 | 6.72E-42  | 7 HERC3      |
| 1.53E-56  | 0.317741601 | 0.694 | 0.43  | 4.91E-52  | 7 MYH10      |
| 6.07E-57  | 0.317553244 | 0.65  | 0.397 | 1.95E-52  | 7 NAA15      |
| 1.96E-82  | 0.317147915 | 0.328 | 0.126 | 6.30E-78  | 7 LINC01226  |
| 3.91E-70  | 0.316662898 | 0.521 | 0.273 | 1.25E-65  | 7 USP14      |
| 1.06E-57  | 0.315990019 | 0.578 | 0.337 | 3.40E-53  | 7 ATAD1      |
| 4.28E-82  | 0.315846831 | 0.396 | 0.168 | 1.38E-77  | 7 KCNC4      |
| 2.04E-53  | 0.315739621 | 0.495 | 0.278 | 6.56E-49  | 7 KLHL2      |
| 1.30E-45  | 0.315417889 | 0.976 | 0.814 | 4.18E-41  | 7 PCCA       |
| 6.70E-56  | 0.315161544 | 0.643 | 0.391 | 2.15E-51  | 7 MYSM1      |
| 7.14E-64  | 0.315092309 | 0.296 | 0.121 | 2.29E-59  | 7 LINC01508  |
| 1.51E-50  | 0.313906559 | 0.692 | 0.447 | 4.85E-46  | 7 HOOK3      |
| 5.51E-70  | 0.313179745 | 0.463 | 0.231 | 1.77E-65  | 7 EIF4E      |
| 1.24E-62  | 0.312632732 | 0.329 | 0.145 | 3.99E-58  | 7 CA2        |
| 1.50E-85  | 0.312391017 | 0.252 | 0.083 | 4.83E-81  | 7 IDI1       |
| 5.85E-99  | 0.312131942 | 0.283 | 0.093 | 1.88E-94  | 7 OAZ1       |
| 1.20E-41  | 0.311922694 | 0.821 | 0.585 | 3.84E-37  | 7 LCOR       |
| 1.40E-124 | 0.311377404 | 0.331 | 0.103 | 4.50E-120 | 7 AC003688.1 |
| 3.85E-162 | 0.311200593 | 0.279 | 0.064 | 1.24E-157 | 7 THOC3      |
| 2.34E-196 | 0.311195822 | 0.284 | 0.056 | 7.53E-192 | 7 AC005746.2 |
| 1.48E-49  | 0.310997549 | 0.985 | 0.82  | 4.75E-45  | 7 MSI2       |
| 2.29E-26  | 0.310860894 | 0.397 | 0.257 | 7.34E-22  | 7 TENT4B     |
| 9.18E-81  | 0.310847455 | 0.414 | 0.184 | 2.95E-76  | 7 POMGNT1    |
| 5.85E-64  | 0.310730304 | 0.555 | 0.308 | 1.88E-59  | 7 UBA6       |
| 3.31E-60  | 0.310572337 | 0.533 | 0.294 | 1.06E-55  | 7 NAA50      |
| 5.74E-48  | 0.310471062 | 0.73  | 0.475 | 1.84E-43  | 7 PRKAA2     |
| 4.80E-61  | 0.31004984  | 0.411 | 0.203 | 1.54E-56  | 7 ABHD2      |
| 4.65E-57  | 0.309067995 | 0.315 | 0.142 | 1.49E-52  | 7 ST14       |
| 2.32E-49  | 0.308883801 | 0.914 | 0.676 | 7.44E-45  | 7 ASIP       |
| 5.66E-34  | 0.308208725 | 0.714 | 0.502 | 1.82E-29  | 7 NEK1       |
| 3.15E-33  | 0.307845462 | 0.741 | 0.523 | 1.01E-28  | 7 TLN2       |
| 2.81E-40  | 0.307585071 | 0.754 | 0.522 | 9.03E-36  | 7 ZFAND6     |
| 1.71E-22  | 0.307373026 | 0.678 | 0.506 | 5.50E-18  | 7 BCKDHB     |
| 3.43E-50  | 0.307194393 | 0.262 | 0.116 | 1.10E-45  | 7 BAG3       |

|           |             |       |       |           |                 |
|-----------|-------------|-------|-------|-----------|-----------------|
| 4.46E-58  | 0.306414788 | 0.702 | 0.442 | 1.43E-53  | 7 WAPL          |
| 2.82E-50  | 0.30579951  | 0.716 | 0.463 | 9.05E-46  | 7 FAM13B        |
| 8.06E-61  | 0.305523677 | 0.793 | 0.494 | 2.59E-56  | 7 RALGPS1       |
| 2.05E-64  | 0.304985641 | 0.505 | 0.266 | 6.59E-60  | 7 MAPKAPK2      |
| 3.66E-90  | 0.304737451 | 0.438 | 0.19  | 1.18E-85  | 7 LMNA          |
| 2.61E-48  | 0.304601955 | 0.603 | 0.372 | 8.38E-44  | 7 DDX10         |
| 1.55E-63  | 0.304513002 | 0.508 | 0.273 | 4.99E-59  | 7 SAMD4B        |
| 3.91E-61  | 0.304492113 | 0.571 | 0.317 | 1.25E-56  | 7 PTPN21        |
| 4.83E-40  | 0.304409113 | 0.749 | 0.522 | 1.55E-35  | 7 RIC1          |
| 2.34E-53  | 0.30348653  | 0.277 | 0.119 | 7.52E-49  | 7 RGS7          |
| 2.23E-28  | 0.303438829 | 0.697 | 0.501 | 7.17E-24  | 7 DENND5B       |
| 1.79E-42  | 0.303376256 | 0.754 | 0.519 | 5.75E-38  | 7 USP3          |
| 8.19E-49  | 0.303139552 | 0.624 | 0.383 | 2.63E-44  | 7 TAF3          |
| 5.40E-41  | 0.302737552 | 0.98  | 0.831 | 1.73E-36  | 7 PARD3         |
| 4.67E-57  | 0.302217518 | 0.411 | 0.209 | 1.50E-52  | 7 ZNRF1         |
| 3.69E-50  | 0.302039552 | 0.591 | 0.362 | 1.18E-45  | 7 TNPO3         |
| 2.99E-74  | 0.301428747 | 0.368 | 0.162 | 9.62E-70  | 7 RPN2          |
| 3.27E-45  | 0.300467965 | 0.649 | 0.415 | 1.05E-40  | 7 HLCS          |
| 3.20E-102 | 0.300119771 | 0.299 | 0.1   | 1.03E-97  | 7 LRRTM2        |
| 2.95E-44  | 0.299695348 | 0.847 | 0.604 | 9.49E-40  | 7 GPATCH8       |
| 7.03E-58  | 0.299204258 | 0.342 | 0.161 | 2.26E-53  | 7 UCHL3         |
| 1.49E-36  | 0.298970939 | 0.592 | 0.372 | 4.79E-32  | 7 IPCEF1        |
| 9.12E-93  | 0.298853336 | 0.348 | 0.132 | 2.93E-88  | 7 MED9          |
| 2.59E-57  | 0.29717466  | 0.508 | 0.28  | 8.32E-53  | 7 TMEM168       |
| 2.01E-65  | 0.296627496 | 0.452 | 0.223 | 6.47E-61  | 7 DCUN1D5       |
| 6.99E-42  | 0.296079637 | 0.362 | 0.191 | 2.25E-37  | 7 ITGA3         |
| 3.40E-57  | 0.2953613   | 0.826 | 0.506 | 1.09E-52  | 7 FREM1         |
| 7.35E-28  | 0.295150669 | 0.717 | 0.518 | 2.36E-23  | 7 JARID2        |
| 1.69E-72  | 0.294560052 | 0.362 | 0.157 | 5.43E-68  | 7 NAB1          |
| 4.63E-42  | 0.294500321 | 0.624 | 0.405 | 1.49E-37  | 7 MEMO1         |
| 1.14E-63  | 0.294463818 | 0.533 | 0.29  | 3.65E-59  | 7 SDHA          |
| 5.86E-54  | 0.294384444 | 0.549 | 0.322 | 1.88E-49  | 7 KPNA1         |
| 2.50E-28  | 0.294046975 | 0.949 | 0.805 | 8.01E-24  | 7 PRKN          |
| 1.22E-64  | 0.293611629 | 0.498 | 0.26  | 3.93E-60  | 7 MICOS10       |
| 6.22E-38  | 0.293345803 | 0.898 | 0.682 | 2.00E-33  | 7 RALGAPA1      |
| 2.16E-48  | 0.29232578  | 0.262 | 0.115 | 6.94E-44  | 7 SLC9A2        |
| 1.61E-56  | 0.292263097 | 0.433 | 0.226 | 5.17E-52  | 7 PGK1          |
| 9.90E-151 | 0.29210787  | 0.28  | 0.067 | 3.18E-146 | 7 HOXD11        |
| 5.20E-61  | 0.291879148 | 0.577 | 0.326 | 1.67E-56  | 7 RALY          |
| 4.47E-50  | 0.291684358 | 0.801 | 0.539 | 1.44E-45  | 7 RAB3IP        |
| 2.92E-105 | 0.291634392 | 0.288 | 0.088 | 9.39E-101 | 7 FGD3          |
| 3.72E-16  | 0.291474858 | 0.283 | 0.186 | 1.19E-11  | 7 STAT1         |
| 1.92E-101 | 0.291410593 | 0.371 | 0.129 | 6.16E-97  | 7 SCNN1G        |
| 4.65E-57  | 0.291274541 | 0.339 | 0.16  | 1.49E-52  | 7 AL513327.1    |
| 4.11E-111 | 0.291202021 | 0.251 | 0.07  | 1.32E-106 | 7 LINC01116     |
| 5.63E-50  | 0.290153064 | 0.632 | 0.392 | 1.81E-45  | 7 SEPTIN7       |
| 5.44E-57  | 0.288811755 | 0.355 | 0.168 | 1.75E-52  | 7 E2F3          |
| 2.54E-43  | 0.288250814 | 0.989 | 0.911 | 8.17E-39  | 7 GPHN          |
| 2.88E-60  | 0.287437961 | 0.567 | 0.322 | 9.26E-56  | 7 DNAJB6        |
| 5.43E-66  | 0.287193252 | 0.424 | 0.206 | 1.75E-61  | 7 ZBTB43        |
| 2.23E-51  | 0.287126664 | 0.571 | 0.345 | 7.15E-47  | 7 SYNJ2BP-COX10 |

|           |             |       |       |             |               |
|-----------|-------------|-------|-------|-------------|---------------|
| 3.03E-65  | 0.287107533 | 0.562 | 0.307 | 9.74E-61    | 7 MFN1        |
| 6.14E-49  | 0.28699379  | 0.591 | 0.364 | 1.97E-44    | 7 FAR1        |
| 3.04E-06  | 0.286600801 | 0.444 | 0.372 | 0.097596535 | 7 SAMD4A      |
| 2.81E-57  | 0.284624981 | 0.633 | 0.372 | 9.01E-53    | 7 TTC7B       |
| 8.31E-35  | 0.2839874   | 0.52  | 0.322 | 2.67E-30    | 7 AL033504.1  |
| 1.30E-56  | 0.283693623 | 0.448 | 0.238 | 4.19E-52    | 7 CYB5B       |
| 6.76E-44  | 0.283396209 | 0.966 | 0.832 | 2.17E-39    | 7 LRBA        |
| 2.81E-60  | 0.283253637 | 0.557 | 0.311 | 9.02E-56    | 7 AATF        |
| 7.01E-45  | 0.283238277 | 0.659 | 0.432 | 2.25E-40    | 7 CDC73       |
| 1.55E-54  | 0.282648959 | 0.582 | 0.332 | 4.97E-50    | 7 TMEM116     |
| 1.25E-55  | 0.282233507 | 0.663 | 0.403 | 4.03E-51    | 7 NFX1        |
| 1.60E-40  | 0.282052193 | 0.402 | 0.23  | 5.15E-36    | 7 UBC         |
| 1.17E-33  | 0.28148879  | 0.443 | 0.27  | 3.75E-29    | 7 GPR39       |
| 7.38E-57  | 0.281245134 | 0.443 | 0.233 | 2.37E-52    | 7 USP36       |
| 2.66E-25  | 0.280707113 | 0.694 | 0.507 | 8.53E-21    | 7 MAN1A1      |
| 3.16E-64  | 0.280607283 | 0.859 | 0.58  | 1.01E-59    | 7 TMEM117     |
| 7.72E-56  | 0.280470284 | 0.788 | 0.5   | 2.48E-51    | 7 TANC1       |
| 4.21E-49  | 0.280326358 | 0.601 | 0.366 | 1.35E-44    | 7 SEC23A      |
| 3.48E-46  | 0.28029925  | 0.754 | 0.502 | 1.12E-41    | 7 GMDS        |
| 3.26E-42  | 0.280055071 | 0.561 | 0.354 | 1.05E-37    | 7 RANBP9      |
| 8.15E-67  | 0.279847693 | 0.338 | 0.145 | 2.62E-62    | 7 RDH10       |
| 8.63E-19  | 0.279041309 | 0.449 | 0.313 | 2.77E-14    | 7 SLC45A4     |
| 1.75E-52  | 0.279012409 | 0.417 | 0.223 | 5.62E-48    | 7 GLRX3       |
| 3.65E-69  | 0.279011096 | 0.444 | 0.215 | 1.17E-64    | 7 AC118553.2  |
| 1.42E-30  | 0.278602635 | 0.666 | 0.46  | 4.56E-26    | 7 LINC01725   |
| 6.38E-45  | 0.278345014 | 0.767 | 0.52  | 2.05E-40    | 7 KIF16B      |
| 3.76E-51  | 0.27739936  | 0.793 | 0.534 | 1.21E-46    | 7 UBE3C       |
| 1.47E-38  | 0.277109919 | 0.713 | 0.494 | 4.72E-34    | 7 MAN1A2      |
| 3.05E-64  | 0.276236577 | 0.601 | 0.335 | 9.81E-60    | 7 ATP5F1C     |
| 1.90E-112 | 0.275965785 | 0.315 | 0.096 | 6.10E-108   | 7 AL512662.1  |
| 4.20E-44  | 0.275716609 | 0.733 | 0.49  | 1.35E-39    | 7 NUP214      |
| 3.46E-36  | 0.275557381 | 0.343 | 0.188 | 1.11E-31    | 7 ZFP36       |
| 3.36E-63  | 0.275033788 | 0.413 | 0.2   | 1.08E-58    | 7 INMT-MINDY4 |
| 5.90E-40  | 0.27497866  | 0.792 | 0.551 | 1.90E-35    | 7 CELF1       |
| 2.15E-44  | 0.27489086  | 0.661 | 0.43  | 6.90E-40    | 7 MTMR3       |
| 4.52E-35  | 0.274808452 | 0.866 | 0.615 | 1.45E-30    | 7 LINC02532   |
| 1.30E-55  | 0.274431379 | 0.521 | 0.292 | 4.18E-51    | 7 XPO6        |
| 9.00E-41  | 0.274327911 | 0.854 | 0.614 | 2.89E-36    | 7 GSK3B       |
| 1.06E-22  | 0.274248639 | 0.543 | 0.383 | 3.42E-18    | 7 BCL2L1      |
| 1.41E-42  | 0.274234585 | 0.43  | 0.246 | 4.53E-38    | 7 PSMD14      |
| 1.64E-51  | 0.273882381 | 0.476 | 0.257 | 5.27E-47    | 7 ME3         |
| 4.22E-77  | 0.273842691 | 0.35  | 0.139 | 1.35E-72    | 7 SORCS2      |
| 5.61E-18  | 0.273686539 | 0.645 | 0.488 | 1.80E-13    | 7 SH3D19      |
| 1.91E-47  | 0.273625894 | 0.622 | 0.39  | 6.12E-43    | 7 ATG5        |
| 1.36E-74  | 0.27261122  | 0.608 | 0.324 | 4.36E-70    | 7 EXOC6       |
| 2.62E-31  | 0.271902482 | 0.395 | 0.242 | 8.43E-27    | 7 SYN3        |
| 1.11E-44  | 0.271664704 | 0.518 | 0.312 | 3.57E-40    | 7 ABCB7       |
| 7.12E-86  | 0.271630666 | 0.436 | 0.191 | 2.29E-81    | 7 ERVK13-1    |
| 1.03E-38  | 0.271297383 | 0.67  | 0.445 | 3.31E-34    | 7 PACSIN2     |
| 1.98E-36  | 0.271113149 | 0.957 | 0.788 | 6.37E-32    | 7 FAF1        |
| 3.60E-65  | 0.270994766 | 0.345 | 0.151 | 1.16E-60    | 7 TTC39C      |

|           |             |       |       |           |              |
|-----------|-------------|-------|-------|-----------|--------------|
| 5.46E-43  | 0.269234702 | 0.847 | 0.603 | 1.75E-38  | 7 PUM1       |
| 3.88E-88  | 0.26910245  | 0.319 | 0.116 | 1.25E-83  | 7 INPP1      |
| 4.98E-97  | 0.26852666  | 0.365 | 0.134 | 1.60E-92  | 7 HOXD10     |
| 1.44E-53  | 0.267270133 | 0.697 | 0.425 | 4.62E-49  | 7 ALOX12P2   |
| 2.07E-34  | 0.267100883 | 0.566 | 0.374 | 6.64E-30  | 7 SESTD1     |
| 5.37E-43  | 0.267010497 | 0.699 | 0.467 | 1.72E-38  | 7 DOPIA      |
| 2.05E-36  | 0.266913161 | 0.686 | 0.467 | 6.60E-32  | 7 CDK8       |
| 7.50E-62  | 0.266576705 | 0.454 | 0.233 | 2.41E-57  | 7 ETF1       |
| 8.16E-20  | 0.26651919  | 0.626 | 0.456 | 2.62E-15  | 7 KLHL13     |
| 7.05E-43  | 0.266054753 | 0.721 | 0.482 | 2.26E-38  | 7 SMAP1      |
| 9.80E-34  | 0.266028083 | 0.52  | 0.333 | 3.15E-29  | 7 ATP8A1     |
| 5.59E-33  | 0.26582237  | 0.865 | 0.649 | 1.79E-28  | 7 NSMCE2     |
| 3.19E-72  | 0.265523174 | 0.323 | 0.134 | 1.02E-67  | 7 ATP5MC3    |
| 4.63E-107 | 0.265168252 | 0.256 | 0.075 | 1.49E-102 | 7 CU633967.1 |
| 9.72E-28  | 0.264952494 | 0.506 | 0.332 | 3.12E-23  | 7 AC034195.1 |
| 9.75E-54  | 0.264548751 | 0.573 | 0.333 | 3.13E-49  | 7 ACO2       |
| 3.24E-21  | 0.263130673 | 0.564 | 0.409 | 1.04E-16  | 7 AF241726.1 |
| 1.42E-53  | 0.263073425 | 0.348 | 0.169 | 4.56E-49  | 7 RUBCN      |
| 9.32E-39  | 0.262742656 | 0.714 | 0.5   | 2.99E-34  | 7 UACA       |
| 2.95E-45  | 0.262295291 | 0.417 | 0.23  | 9.47E-41  | 7 ZDHHC2     |
| 2.48E-39  | 0.262138354 | 0.35  | 0.189 | 7.96E-35  | 7 JADE3      |
| 1.25E-55  | 0.262101277 | 0.477 | 0.257 | 4.00E-51  | 7 TAF1B      |
| 1.05E-40  | 0.262096524 | 0.647 | 0.422 | 3.37E-36  | 7 ABII       |
| 5.37E-46  | 0.261975844 | 0.646 | 0.412 | 1.73E-41  | 7 RALGAPB    |
| 1.01E-35  | 0.261833075 | 0.659 | 0.446 | 3.25E-31  | 7 GPATCH2    |
| 3.23E-40  | 0.261764394 | 0.755 | 0.52  | 1.04E-35  | 7 GBF1       |
| 8.31E-45  | 0.261682946 | 0.505 | 0.297 | 2.67E-40  | 7 LEMD3      |
| 5.26E-36  | 0.26163603  | 0.604 | 0.398 | 1.69E-31  | 7 CDYL       |
| 1.48E-40  | 0.261559156 | 0.668 | 0.44  | 4.76E-36  | 7 AP2B1      |
| 2.48E-51  | 0.261086187 | 0.474 | 0.261 | 7.95E-47  | 7 PPTC7      |
| 1.54E-40  | 0.260236316 | 0.448 | 0.263 | 4.95E-36  | 7 GTF2F2     |
| 1.44E-54  | 0.259566857 | 0.389 | 0.195 | 4.62E-50  | 7 RAB22A     |
| 1.36E-18  | 0.258499561 | 0.693 | 0.527 | 4.38E-14  | 7 PLCXD2     |
| 2.23E-62  | 0.25822745  | 0.362 | 0.167 | 7.17E-58  | 7 SCRNI      |
| 5.08E-39  | 0.257913628 | 0.742 | 0.497 | 1.63E-34  | 7 WDFY2      |
| 5.34E-53  | 0.257344716 | 0.417 | 0.21  | 1.71E-48  | 7 EML6       |
| 4.41E-31  | 0.257331659 | 0.733 | 0.513 | 1.42E-26  | 7 ST7        |
| 2.61E-42  | 0.25685703  | 0.81  | 0.554 | 8.39E-38  | 7 COG5       |
| 2.01E-28  | 0.256120652 | 0.856 | 0.646 | 6.46E-24  | 7 UBR5       |
| 3.83E-29  | 0.255789751 | 0.67  | 0.475 | 1.23E-24  | 7 POU2F1     |
| 1.45E-52  | 0.25491992  | 0.314 | 0.148 | 4.65E-48  | 7 IDH3A      |
| 3.23E-36  | 0.25482927  | 0.685 | 0.467 | 1.04E-31  | 7 RAP1B      |
| 2.09E-38  | 0.254769014 | 0.813 | 0.578 | 6.73E-34  | 7 PPP1R12A   |
| 1.93E-27  | 0.254107472 | 0.868 | 0.667 | 6.21E-23  | 7 DLG1       |
| 3.02E-36  | 0.254050815 | 0.609 | 0.409 | 9.71E-32  | 7 RELCH      |
| 2.21E-32  | 0.253953355 | 0.946 | 0.757 | 7.10E-28  | 7 ITPR2      |
| 5.28E-18  | 0.25385011  | 0.832 | 0.708 | 1.70E-13  | 7 MACROD2    |
| 5.42E-50  | 0.253809149 | 0.709 | 0.449 | 1.74E-45  | 7 DHX15      |
| 1.04E-62  | 0.253625883 | 0.439 | 0.219 | 3.33E-58  | 7 SLC23A2    |
| 1.73E-47  | 0.25352946  | 0.652 | 0.411 | 5.54E-43  | 7 MAPK1      |
| 5.32E-49  | 0.25352457  | 0.738 | 0.482 | 1.71E-44  | 7 UBE2D2     |

|          |             |       |       |          |              |
|----------|-------------|-------|-------|----------|--------------|
| 2.45E-34 | 0.253147676 | 0.304 | 0.161 | 7.88E-30 | 7 STAC       |
| 2.95E-41 | 0.253113309 | 0.877 | 0.658 | 9.49E-37 | 7 ANKRD11    |
| 1.80E-31 | 0.252455029 | 0.914 | 0.707 | 5.77E-27 | 7 MKLN1      |
| 6.78E-51 | 0.252382111 | 0.635 | 0.385 | 2.18E-46 | 7 PEX14      |
| 2.60E-23 | 0.251848024 | 0.681 | 0.495 | 8.35E-19 | 7 SMAD2      |
| 1.75E-57 | 0.251399731 | 0.564 | 0.323 | 5.64E-53 | 7 DIP2A      |
| 3.74E-24 | 0.251223725 | 0.433 | 0.287 | 1.20E-19 | 7 LAMC1      |
| 5.91E-47 | 0.250725971 | 0.528 | 0.313 | 1.90E-42 | 7 WIPF2      |
| 0        | 2.827273114 | 1     | 0.261 | 0        | 8 SLC5A12    |
| 0        | 2.719745201 | 0.997 | 0.31  | 0        | 8 UGT1A8     |
| 0        | 2.682935689 | 0.97  | 0.244 | 0        | 8 SORCS1     |
| 0        | 2.414820047 | 0.963 | 0.215 | 0        | 8 RHOBTB1    |
| 0        | 2.399233118 | 0.997 | 0.4   | 0        | 8 NLGN1      |
| 0        | 2.383879433 | 0.891 | 0.133 | 0        | 8 PCK1       |
| 0        | 2.358623765 | 0.997 | 0.269 | 0        | 8 SLC16A9    |
| 0        | 2.304790417 | 0.985 | 0.333 | 0        | 8 NOX4       |
| 0        | 2.285421436 | 1     | 0.429 | 0        | 8 CUBN       |
| 0        | 2.230369216 | 0.999 | 0.238 | 0        | 8 SLC13A3    |
| 0        | 2.204302353 | 0.975 | 0.172 | 0        | 8 ALDOB      |
| 0        | 2.201072949 | 0.808 | 0.213 | 0        | 8 PPP2R2B    |
| 0        | 2.177004712 | 0.987 | 0.215 | 0        | 8 PAH        |
| 0        | 2.159875764 | 0.992 | 0.259 | 0        | 8 SLC17A1    |
| 0        | 2.108784841 | 0.865 | 0.272 | 0        | 8 PCDH15     |
| 0        | 2.101196732 | 0.997 | 0.344 | 0        | 8 LRP2       |
| 0        | 2.089260961 | 0.862 | 0.054 | 0        | 8 AL162725.2 |
| 0        | 2.073395861 | 0.993 | 0.296 | 0        | 8 SLC2A9     |
| 0        | 2.064107069 | 0.954 | 0.208 | 0        | 8 LINC01060  |
| 0        | 2.0523302   | 0.909 | 0.153 | 0        | 8 AL110292.1 |
| 0        | 2.048479109 | 0.97  | 0.151 | 0        | 8 SLC36A2    |
| 0        | 2.045405    | 0.996 | 0.399 | 0        | 8 SLC4A4     |
| 0        | 2.002174582 | 0.99  | 0.458 | 0        | 8 FKBP5      |
| 0        | 1.999545747 | 0.972 | 0.38  | 0        | 8 ERFFI1     |
| 0        | 1.993690254 | 0.997 | 0.428 | 0        | 8 PDZD2      |
| 0        | 1.961503171 | 0.994 | 0.413 | 0        | 8 SUGCT      |
| 0        | 1.944735934 | 0.985 | 0.49  | 0        | 8 RNF152     |
| 0        | 1.943612967 | 0.913 | 0.294 | 0        | 8 LINC00278  |
| 0        | 1.926348383 | 0.96  | 0.123 | 0        | 8 CYP4A11    |
| 0        | 1.92562871  | 0.601 | 0.146 | 0        | 8 CDH20      |
| 0        | 1.914816697 | 0.96  | 0.191 | 0        | 8 ASS1       |
| 0        | 1.906643277 | 0.992 | 0.348 | 0        | 8 BNC2       |
| 0        | 1.893997204 | 0.992 | 0.483 | 0        | 8 EPB41L3    |
| 0        | 1.868830071 | 0.97  | 0.256 | 0        | 8 MIR100HG   |
| 0        | 1.861061901 | 0.793 | 0.117 | 0        | 8 CDH9       |
| 0        | 1.860286638 | 0.686 | 0.078 | 0        | 8 ST18       |
| 0        | 1.848592359 | 0.756 | 0.112 | 0        | 8 LINC02147  |
| 0        | 1.830028374 | 0.975 | 0.399 | 0        | 8 SLC16A12   |
| 0        | 1.795347324 | 0.962 | 0.159 | 0        | 8 HNF4A      |
| 0        | 1.777111565 | 0.983 | 0.245 | 0        | 8 ACSF2      |
| 0        | 1.770191602 | 0.956 | 0.262 | 0        | 8 ENPEP      |
| 0        | 1.76424495  | 0.927 | 0.199 | 0        | 8 AL391117.1 |
| 0        | 1.751298314 | 0.593 | 0.093 | 0        | 8 AC105094.2 |

|   |             |       |       |   |               |
|---|-------------|-------|-------|---|---------------|
| 0 | 1.748457717 | 0.965 | 0.347 | 0 | 8 LIN52       |
| 0 | 1.745380819 | 0.828 | 0.154 | 0 | 8 AC004053.1  |
| 0 | 1.742990391 | 0.924 | 0.206 | 0 | 8 ACO1        |
| 0 | 1.73271563  | 0.89  | 0.133 | 0 | 8 SLC17A3     |
| 0 | 1.732638662 | 0.663 | 0.166 | 0 | 8 ZNF804B     |
| 0 | 1.704496681 | 0.844 | 0.101 | 0 | 8 CYP4Z1      |
| 0 | 1.702397726 | 0.862 | 0.105 | 0 | 8 KCNK5       |
| 0 | 1.68441436  | 0.869 | 0.225 | 0 | 8 SYT1        |
| 0 | 1.676989483 | 0.942 | 0.153 | 0 | 8 DPYS        |
| 0 | 1.675927689 | 0.816 | 0.137 | 0 | 8 GDA         |
| 0 | 1.671426442 | 0.749 | 0.063 | 0 | 8 G6PC        |
| 0 | 1.668377673 | 0.542 | 0.09  | 0 | 8 CACNA1E     |
| 0 | 1.666627789 | 1     | 0.961 | 0 | 8 NEAT1       |
| 0 | 1.648928589 | 0.983 | 0.413 | 0 | 8 MSRA        |
| 0 | 1.642213405 | 0.941 | 0.141 | 0 | 8 PLG         |
| 0 | 1.634230486 | 0.837 | 0.299 | 0 | 8 TUBGCP3     |
| 0 | 1.628057236 | 0.895 | 0.123 | 0 | 8 PPP1R16B    |
| 0 | 1.621914295 | 0.879 | 0.255 | 0 | 8 LINC00871   |
| 0 | 1.619778274 | 0.914 | 0.174 | 0 | 8 AK4         |
| 0 | 1.612517609 | 0.971 | 0.48  | 0 | 8 DMGDH       |
| 0 | 1.610188518 | 0.828 | 0.091 | 0 | 8 LINC02027   |
| 0 | 1.608507057 | 0.903 | 0.117 | 0 | 8 CYP4A22-AS1 |
| 0 | 1.607214054 | 1     | 0.33  | 0 | 8 ACSM2B      |
| 0 | 1.589729392 | 0.997 | 0.731 | 0 | 8 WDR72       |
| 0 | 1.589207048 | 0.978 | 0.23  | 0 | 8 SLC47A1     |
| 0 | 1.57950654  | 0.955 | 0.234 | 0 | 8 CCNT2-AS1   |
| 0 | 1.576485011 | 0.926 | 0.323 | 0 | 8 AASS        |
| 0 | 1.574223585 | 0.829 | 0.132 | 0 | 8 AGMO        |
| 0 | 1.572304471 | 0.843 | 0.151 | 0 | 8 MMADHC-DT   |
| 0 | 1.564193307 | 0.939 | 0.242 | 0 | 8 PDZK1       |
| 0 | 1.536776279 | 0.945 | 0.186 | 0 | 8 SLC13A1     |
| 0 | 1.526218106 | 0.946 | 0.246 | 0 | 8 PCSK5       |
| 0 | 1.521389926 | 0.898 | 0.133 | 0 | 8 HECW1       |
| 0 | 1.517772015 | 1     | 0.362 | 0 | 8 ACSM2A      |
| 0 | 1.505933007 | 0.786 | 0.107 | 0 | 8 FBP1        |
| 0 | 1.504125874 | 0.782 | 0.078 | 0 | 8 AC004485.1  |
| 0 | 1.49403442  | 0.926 | 0.235 | 0 | 8 CDHR3       |
| 0 | 1.493305788 | 0.882 | 0.104 | 0 | 8 UPB1        |
| 0 | 1.492986348 | 0.941 | 0.357 | 0 | 8 KCNJ15      |
| 0 | 1.492030539 | 0.975 | 0.283 | 0 | 8 MME         |
| 0 | 1.476061973 | 0.963 | 0.215 | 0 | 8 GLYAT       |
| 0 | 1.47256165  | 0.865 | 0.137 | 0 | 8 CDH2        |
| 0 | 1.462088604 | 0.982 | 0.454 | 0 | 8 CRYL1       |
| 0 | 1.460312515 | 0.872 | 0.101 | 0 | 8 SLC22A8     |
| 0 | 1.459243021 | 0.997 | 0.506 | 0 | 8 NCKAP5      |
| 0 | 1.455003658 | 0.938 | 0.294 | 0 | 8 GRAMD1B     |
| 0 | 1.448892379 | 0.979 | 0.186 | 0 | 8 AGXT2       |
| 0 | 1.447523854 | 0.907 | 0.136 | 0 | 8 GLIS1       |
| 0 | 1.445391109 | 0.941 | 0.365 | 0 | 8 PDGFC       |
| 0 | 1.444193163 | 0.972 | 0.389 | 0 | 8 LINC01320   |
| 0 | 1.43777811  | 0.917 | 0.23  | 0 | 8 EHHADH      |

|           |             |       |       |           |              |
|-----------|-------------|-------|-------|-----------|--------------|
| 0         | 1.417079777 | 0.986 | 0.566 | 0         | 8 FGGY       |
| 0         | 1.416362411 | 0.998 | 0.584 | 0         | 8 RAB11FIP3  |
| 0         | 1.412389044 | 0.888 | 0.17  | 0         | 8 PEPD       |
| 0         | 1.404324651 | 0.798 | 0.126 | 0         | 8 KIAA1191   |
| 0         | 1.397162513 | 0.923 | 0.239 | 0         | 8 BHMT2      |
| 0         | 1.389938455 | 0.873 | 0.228 | 0         | 8 DDX58      |
| 1.56E-215 | 1.371076791 | 0.905 | 0.492 | 5.00E-211 | 8 SDK1       |
| 0         | 1.363886375 | 0.863 | 0.262 | 0         | 8 AC113414.1 |
| 8.98E-244 | 1.358085749 | 0.927 | 0.548 | 2.88E-239 | 8 RDX        |
| 0         | 1.353023993 | 0.773 | 0.226 | 0         | 8 LIPA       |
| 0         | 1.35048411  | 0.82  | 0.083 | 0         | 8 CYP4F3     |
| 0         | 1.349640513 | 0.955 | 0.399 | 0         | 8 GPC6       |
| 0         | 1.349577072 | 0.884 | 0.219 | 0         | 8 HGD        |
| 0         | 1.345873403 | 0.681 | 0.075 | 0         | 8 DGKG       |
| 0         | 1.342341961 | 0.898 | 0.178 | 0         | 8 AL589669.1 |
| 0         | 1.340764523 | 0.969 | 0.346 | 0         | 8 PTPRD      |
| 0         | 1.333478249 | 0.975 | 0.235 | 0         | 8 SLC6A13    |
| 0         | 1.323253172 | 0.918 | 0.243 | 0         | 8 TENM1      |
| 0         | 1.320715259 | 0.934 | 0.309 | 0         | 8 C9         |
| 0         | 1.320553102 | 0.647 | 0.084 | 0         | 8 OTOGL      |
| 0         | 1.312800623 | 0.953 | 0.429 | 0         | 8 SAMD5      |
| 0         | 1.311152319 | 0.872 | 0.144 | 0         | 8 SLC47A2    |
| 0         | 1.302071942 | 0.797 | 0.107 | 0         | 8 AC087762.1 |
| 0         | 1.301137306 | 0.846 | 0.166 | 0         | 8 SMIM2-AS1  |
| 0         | 1.300767621 | 0.603 | 0.076 | 0         | 8 LINC01229  |
| 0         | 1.298095328 | 0.463 | 0.074 | 0         | 8 AP003049.2 |
| 0         | 1.297225064 | 0.78  | 0.119 | 0         | 8 ATP8B4     |
| 0         | 1.294599143 | 0.905 | 0.266 | 0         | 8 TM7SF3     |
| 0         | 1.292504129 | 0.982 | 0.487 | 0         | 8 PPARA      |
| 0         | 1.286994828 | 0.94  | 0.294 | 0         | 8 SLC12A6    |
| 0         | 1.28675848  | 0.861 | 0.217 | 0         | 8 AC096577.1 |
| 0         | 1.277973397 | 0.92  | 0.227 | 0         | 8 TINAG      |
| 0         | 1.272240875 | 0.777 | 0.183 | 0         | 8 RMST       |
| 0         | 1.271186009 | 0.963 | 0.191 | 0         | 8 SLC22A6    |
| 0         | 1.263940361 | 0.893 | 0.137 | 0         | 8 ANPEP      |
| 0         | 1.262209679 | 0.988 | 0.529 | 0         | 8 ZBTB16     |
| 0         | 1.258880968 | 0.851 | 0.29  | 0         | 8 CYP3A5     |
| 0         | 1.258421677 | 0.951 | 0.488 | 0         | 8 MAP3K13    |
| 0         | 1.257294586 | 0.691 | 0.066 | 0         | 8 ABLIM3     |
| 0         | 1.257194606 | 0.91  | 0.368 | 0         | 8 CNTN4      |
| 0         | 1.25392982  | 0.815 | 0.12  | 0         | 8 AC087482.1 |
| 0         | 1.253511698 | 0.907 | 0.133 | 0         | 8 DPEP1      |
| 0         | 1.25191786  | 0.788 | 0.123 | 0         | 8 NPL        |
| 0         | 1.2508569   | 0.861 | 0.164 | 0         | 8 GIPC2      |
| 0         | 1.24531543  | 0.965 | 0.208 | 0         | 8 MIOX       |
| 0         | 1.243896755 | 0.925 | 0.226 | 0         | 8 ARHGAP10   |
| 0         | 1.241412606 | 0.836 | 0.123 | 0         | 8 MAPT       |
| 0         | 1.239773362 | 0.929 | 0.219 | 0         | 8 LINC00671  |
| 0         | 1.234720685 | 1     | 0.644 | 0         | 8 MAST4      |
| 0         | 1.233685471 | 0.89  | 0.206 | 0         | 8 ARHGAP42   |
| 0         | 1.229737402 | 0.929 | 0.38  | 0         | 8 MTFR1      |



|           |             |       |       |           |              |
|-----------|-------------|-------|-------|-----------|--------------|
| 8.22E-307 | 1.224911577 | 0.878 | 0.385 | 2.64E-302 | 8 TTTY14     |
| 0         | 1.222411342 | 0.789 | 0.179 | 0         | 8 POR        |
| 0         | 1.219751012 | 0.849 | 0.355 | 0         | 8 MFSD14B    |
| 0         | 1.219510536 | 0.916 | 0.378 | 0         | 8 SH3YL1     |
| 0         | 1.218766339 | 0.633 | 0.073 | 0         | 8 AL033381.1 |
| 0         | 1.215655348 | 0.866 | 0.172 | 0         | 8 SHMT1      |
| 0         | 1.211897264 | 0.889 | 0.268 | 0         | 8 BNIP3L     |
| 0         | 1.207866556 | 0.804 | 0.118 | 0         | 8 SLC7A7     |
| 4.79E-275 | 1.205712978 | 0.847 | 0.366 | 1.54E-270 | 8 SGO1-AS1   |
| 0         | 1.203459486 | 0.632 | 0.115 | 0         | 8 AL031599.1 |
| 0         | 1.198574477 | 0.916 | 0.335 | 0         | 8 PLEKHA6    |
| 0         | 1.198484706 | 0.752 | 0.166 | 0         | 8 GPR155     |
| 0         | 1.196067061 | 0.724 | 0.073 | 0         | 8 ZYG11A     |
| 0         | 1.195195969 | 0.819 | 0.177 | 0         | 8 LINC01239  |
| 0         | 1.195077605 | 0.85  | 0.202 | 0         | 8 RGL1       |
| 0         | 1.19215807  | 0.962 | 0.494 | 0         | 8 PCLO       |
| 0         | 1.189589491 | 0.884 | 0.26  | 0         | 8 KIAA1549   |
| 1.41E-279 | 1.183435023 | 0.736 | 0.272 | 4.52E-275 | 8 RANBP17    |
| 0         | 1.182323007 | 0.658 | 0.139 | 0         | 8 CXXC4-AS1  |
| 0         | 1.177735191 | 0.891 | 0.351 | 0         | 8 GLDC       |
| 0         | 1.177143365 | 0.915 | 0.231 | 0         | 8 EBNA1BP2   |
| 0         | 1.172626328 | 0.845 | 0.224 | 0         | 8 EVA1A      |
| 0         | 1.172544125 | 0.846 | 0.2   | 0         | 8 SLC66A2    |
| 0         | 1.171362149 | 0.941 | 0.484 | 0         | 8 RREB1      |
| 0         | 1.171134811 | 0.838 | 0.264 | 0         | 8 ZFAT       |
| 5.39E-136 | 1.167934375 | 0.509 | 0.21  | 1.73E-131 | 8 MAN1C1     |
| 0         | 1.162464506 | 0.888 | 0.234 | 0         | 8 PRUNE2     |
| 0         | 1.157336071 | 0.982 | 0.682 | 0         | 8 REV3L      |
| 0         | 1.154823814 | 0.973 | 0.422 | 0         | 8 TPCN1      |
| 0         | 1.150827439 | 0.857 | 0.324 | 0         | 8 ACSL1      |
| 0         | 1.145978982 | 0.849 | 0.242 | 0         | 8 FN3K       |
| 0         | 1.139188474 | 0.997 | 0.591 | 0         | 8 TRPM3      |
| 1.25E-290 | 1.137709585 | 0.766 | 0.286 | 4.01E-286 | 8 P4HA1      |
| 0         | 1.136119488 | 0.822 | 0.198 | 0         | 8 ALDH3A2    |
| 0         | 1.123735398 | 0.911 | 0.299 | 0         | 8 PRLR       |
| 0         | 1.123416299 | 0.704 | 0.071 | 0         | 8 SORD       |
| 0         | 1.121653637 | 0.76  | 0.176 | 0         | 8 TNFRSF21   |
| 1.54E-303 | 1.118688307 | 0.978 | 0.66  | 4.96E-299 | 8 PLEKHA7    |
| 0         | 1.113517434 | 0.697 | 0.152 | 0         | 8 F11-AS1    |
| 9.27E-258 | 1.100102406 | 0.974 | 0.649 | 2.98E-253 | 8 TRPS1      |
| 0         | 1.099923687 | 0.801 | 0.135 | 0         | 8 FIGNL1     |
| 2.09E-279 | 1.097464461 | 0.994 | 0.695 | 6.71E-275 | 8 DLG2       |
| 0         | 1.09703022  | 0.842 | 0.166 | 0         | 8 TTC38      |
| 0         | 1.095221665 | 0.929 | 0.234 | 0         | 8 RASSF4     |
| 0         | 1.092435901 | 0.724 | 0.141 | 0         | 8 SLC25A48   |
| 0         | 1.091419571 | 0.777 | 0.167 | 0         | 8 LINC01788  |
| 0         | 1.088587542 | 0.749 | 0.153 | 0         | 8 AP002518.2 |
| 0         | 1.088419636 | 0.658 | 0.102 | 0         | 8 IFIT5      |
| 0         | 1.087863456 | 0.982 | 0.513 | 0         | 8 GUSBP11    |
| 3.51E-218 | 1.086646715 | 0.831 | 0.409 | 1.13E-213 | 8 AL390334.1 |
| 0         | 1.07935482  | 0.811 | 0.144 | 0         | 8 SLC25A42   |

|           |             |       |       |           |               |
|-----------|-------------|-------|-------|-----------|---------------|
| 0         | 1.07802819  | 0.682 | 0.126 | 0         | 8 LYPLAL1-AS1 |
| 0         | 1.077428097 | 0.897 | 0.343 | 0         | 8 DLEU2       |
| 0         | 1.076070829 | 0.801 | 0.225 | 0         | 8 SLC22A5     |
| 0         | 1.073440094 | 0.969 | 0.533 | 0         | 8 AIG1        |
| 0         | 1.069776604 | 0.74  | 0.158 | 0         | 8 SLC39A14    |
| 0         | 1.068352953 | 0.862 | 0.245 | 0         | 8 NQO2        |
| 0         | 1.064520941 | 0.89  | 0.351 | 0         | 8 FRMD4B      |
| 0         | 1.060972934 | 0.855 | 0.296 | 0         | 8 MTARC2      |
| 0         | 1.059177653 | 0.948 | 0.398 | 0         | 8 HPN         |
| 0         | 1.052886933 | 0.822 | 0.275 | 0         | 8 GALNT2      |
| 1.27E-267 | 1.051414798 | 0.729 | 0.261 | 4.09E-263 | 8 AL359232.1  |
| 0         | 1.051311887 | 0.859 | 0.306 | 0         | 8 CYB5A       |
| 0         | 1.045241524 | 0.641 | 0.054 | 0         | 8 A1CF        |
| 0         | 1.04411607  | 0.882 | 0.318 | 0         | 8 PDE7A       |
| 0         | 1.039990323 | 0.658 | 0.068 | 0         | 8 HAO2        |
| 1.39E-292 | 1.039744101 | 0.551 | 0.153 | 4.46E-288 | 8 TBC1D8B     |
| 0         | 1.037011419 | 0.884 | 0.325 | 0         | 8 SLC1A1      |
| 0         | 1.034919907 | 0.937 | 0.353 | 0         | 8 CLDN10      |
| 1.98E-273 | 1.03424376  | 0.754 | 0.273 | 6.37E-269 | 8 ZNF385B     |
| 1.73E-284 | 1.033421628 | 0.995 | 0.792 | 5.55E-280 | 8 PLEKHA5     |
| 0         | 1.032828741 | 0.726 | 0.151 | 0         | 8 IGSF11      |
| 0         | 1.032628633 | 0.655 | 0.026 | 0         | 8 CYP4A22     |
| 0         | 1.032370132 | 0.683 | 0.098 | 0         | 8 GLYATL1     |
| 0         | 1.032267333 | 0.612 | 0.08  | 0         | 8 BHMT        |
| 0         | 1.031217649 | 0.427 | 0.063 | 0         | 8 F13A1       |
| 0         | 1.029259813 | 0.87  | 0.23  | 0         | 8 AC027288.3  |
| 0         | 1.02808288  | 0.828 | 0.197 | 0         | 8 SAT2        |
| 0         | 1.026500195 | 0.998 | 0.832 | 0         | 8 RABGAP1L    |
| 0         | 1.025900234 | 0.829 | 0.177 | 0         | 8 IL6R        |
| 0         | 1.02522036  | 0.818 | 0.255 | 0         | 8 SNX30       |
| 0         | 1.022224831 | 0.697 | 0.103 | 0         | 8 HNF4G       |
| 6.97E-300 | 1.020075265 | 0.976 | 0.562 | 2.24E-295 | 8 TNS1        |
| 0         | 1.019144011 | 0.633 | 0.109 | 0         | 8 DRAIC       |
| 0         | 1.018422633 | 0.675 | 0.069 | 0         | 8 OR2T11      |
| 0         | 1.013456    | 0.89  | 0.237 | 0         | 8 ENPP7P8     |
| 0         | 1.013224741 | 0.856 | 0.335 | 0         | 8 RTTN        |
| 0         | 1.008442779 | 0.583 | 0.082 | 0         | 8 SCN1A-AS1   |
| 0         | 1.007048778 | 0.826 | 0.23  | 0         | 8 AC005726.1  |
| 3.32E-271 | 1.004886216 | 0.987 | 0.633 | 1.07E-266 | 8 NFIB        |
| 0         | 1.003971523 | 0.884 | 0.256 | 0         | 8 BBOX1       |
| 0         | 1.003324932 | 0.837 | 0.232 | 0         | 8 Z93403.1    |
| 0         | 1.002888548 | 0.699 | 0.114 | 0         | 8 GBA3        |
| 0         | 1.000985813 | 0.698 | 0.081 | 0         | 8 LINC00390   |
| 0         | 0.999605554 | 0.592 | 0.071 | 0         | 8 SLC2A2      |
| 0         | 0.99792574  | 0.751 | 0.109 | 0         | 8 P4HA2       |
| 0         | 0.996258566 | 0.744 | 0.131 | 0         | 8 PDZK1P1     |
| 0         | 0.995337429 | 0.871 | 0.16  | 0         | 8 SLC28A1     |
| 0         | 0.995285227 | 0.78  | 0.221 | 0         | 8 AC012593.1  |
| 1.00E-289 | 0.99188588  | 0.848 | 0.374 | 3.21E-285 | 8 SUCLG1      |
| 0         | 0.991763191 | 0.663 | 0.077 | 0         | 8 ENPP2       |
| 0         | 0.990424054 | 0.898 | 0.375 | 0         | 8 ELL2        |

|           |             |       |       |           |                 |
|-----------|-------------|-------|-------|-----------|-----------------|
| 0         | 0.98951617  | 0.542 | 0.058 | 0         | 8 SYN2          |
| 0         | 0.986124223 | 0.478 | 0.075 | 0         | 8 MT1G          |
| 0         | 0.986040789 | 0.669 | 0.08  | 0         | 8 AL358232.1    |
| 0         | 0.985853266 | 0.946 | 0.381 | 0         | 8 GRB10         |
| 0         | 0.983615292 | 0.773 | 0.216 | 0         | 8 MTHFS         |
| 0         | 0.981670576 | 0.726 | 0.076 | 0         | 8 SLC6A19       |
| 1.30E-239 | 0.978725532 | 0.959 | 0.565 | 4.17E-235 | 8 TRABD2B       |
| 0         | 0.978663485 | 0.936 | 0.384 | 0         | 8 MCF2L         |
| 2.16E-288 | 0.976887521 | 0.954 | 0.523 | 6.95E-284 | 8 CMIP          |
| 0         | 0.975572651 | 0.664 | 0.065 | 0         | 8 TMEM246-AS1   |
| 0         | 0.971512209 | 0.788 | 0.128 | 0         | 8 ABCC2         |
| 0         | 0.971376146 | 0.761 | 0.134 | 0         | 8 SFXN2         |
| 4.04E-247 | 0.969072541 | 0.99  | 0.76  | 1.30E-242 | 8 IGF1R         |
| 2.58E-288 | 0.967756663 | 0.987 | 0.598 | 8.30E-284 | 8 L3MBTL4       |
| 0         | 0.96629276  | 0.726 | 0.116 | 0         | 8 EPHA7         |
| 0         | 0.965594559 | 0.946 | 0.326 | 0         | 8 CNTNAP3B      |
| 6.79E-296 | 0.964533558 | 0.918 | 0.408 | 2.18E-291 | 8 OSBPL10       |
| 0         | 0.964014966 | 0.673 | 0.186 | 0         | 8 ZNF826P       |
| 1.30E-273 | 0.963275211 | 0.757 | 0.266 | 4.18E-269 | 8 LINC01515     |
| 0         | 0.962568443 | 0.842 | 0.203 | 0         | 8 PAPLN         |
| 0         | 0.961987141 | 0.754 | 0.186 | 0         | 8 GPR137B       |
| 0         | 0.960760621 | 0.557 | 0.112 | 0         | 8 SH3BP5        |
| 0         | 0.958834137 | 0.941 | 0.256 | 0         | 8 GPX3          |
| 7.85E-276 | 0.955138841 | 0.967 | 0.494 | 2.52E-271 | 8 NFIA          |
| 0         | 0.954598272 | 0.683 | 0.079 | 0         | 8 HPD           |
| 4.66E-264 | 0.951675031 | 0.993 | 0.751 | 1.50E-259 | 8 CDK14         |
| 0         | 0.95073484  | 0.801 | 0.217 | 0         | 8 CTSB          |
| 2.22E-303 | 0.950056283 | 0.88  | 0.387 | 7.12E-299 | 8 NEO1          |
| 0         | 0.947557365 | 0.708 | 0.181 | 0         | 8 MAOA          |
| 0         | 0.942995833 | 0.444 | 0.057 | 0         | 8 G0S2          |
| 0         | 0.937041133 | 0.81  | 0.237 | 0         | 8 CRYZL2P-SEC10 |
| 0         | 0.935820763 | 0.427 | 0.06  | 0         | 8 AP003400.1    |
| 0         | 0.933172625 | 0.85  | 0.182 | 0         | 8 XYLB          |
| 0         | 0.929696324 | 0.571 | 0.055 | 0         | 8 AOX1          |
| 0         | 0.928810628 | 0.849 | 0.327 | 0         | 8 SFXN5         |
| 0         | 0.928641218 | 0.887 | 0.386 | 0         | 8 PPP1R21       |
| 2.46E-278 | 0.926575101 | 0.895 | 0.403 | 7.90E-274 | 8 AC093423.3    |
| 0         | 0.925566946 | 0.791 | 0.112 | 0         | 8 PDZK1IP1      |
| 0         | 0.923122434 | 0.789 | 0.101 | 0         | 8 FUT6          |
| 0         | 0.917358182 | 0.737 | 0.176 | 0         | 8 ESR1          |
| 2.37E-263 | 0.915627169 | 0.939 | 0.483 | 7.61E-259 | 8 ZHX3          |
| 0         | 0.915390049 | 0.787 | 0.151 | 0         | 8 ABCC6         |
| 0         | 0.911182116 | 0.609 | 0.068 | 0         | 8 LINC01847     |
| 3.25E-299 | 0.910921003 | 0.946 | 0.481 | 1.04E-294 | 8 MIA2          |
| 0         | 0.909149203 | 0.918 | 0.36  | 0         | 8 RERG          |
| 0         | 0.908682869 | 0.462 | 0.041 | 0         | 8 SMIM35        |
| 0         | 0.908015936 | 0.604 | 0.078 | 0         | 8 TRPC7         |
| 3.54E-266 | 0.906587475 | 0.835 | 0.351 | 1.14E-261 | 8 CCDC146       |
| 0         | 0.906001898 | 0.54  | 0.042 | 0         | 8 SLC23A4P      |
| 0         | 0.905634715 | 0.708 | 0.155 | 0         | 8 MAOB          |
| 1.46E-239 | 0.902091507 | 0.958 | 0.61  | 4.70E-235 | 8 GLG1          |

|           |             |       |       |           |               |
|-----------|-------------|-------|-------|-----------|---------------|
| 1.77E-300 | 0.902038194 | 0.917 | 0.419 | 5.67E-296 | 8 AC105233.4  |
| 0         | 0.901923738 | 0.706 | 0.094 | 0         | 8 USH1C       |
| 7.44E-248 | 0.898658559 | 0.937 | 0.522 | 2.39E-243 | 8 XPR1        |
| 1.05E-232 | 0.896924355 | 0.819 | 0.356 | 3.38E-228 | 8 CACNA2D1    |
| 4.00E-286 | 0.896753086 | 0.884 | 0.413 | 1.28E-281 | 8 SETD3       |
| 0         | 0.896032126 | 0.76  | 0.141 | 0         | 8 SLC27A2     |
| 0         | 0.893708476 | 0.771 | 0.124 | 0         | 8 ABHD14A-ACY |
| 2.16E-206 | 0.891927774 | 0.867 | 0.41  | 6.95E-202 | 8 CPM         |
| 0         | 0.890027748 | 0.636 | 0.068 | 0         | 8 LINC02499   |
| 0         | 0.88911284  | 0.5   | 0.052 | 0         | 8 HSD11B1-AS1 |
| 0         | 0.886787333 | 0.666 | 0.108 | 0         | 8 LINC02275   |
| 1.19E-156 | 0.886555876 | 0.941 | 0.631 | 3.83E-152 | 8 SIK2        |
| 0         | 0.885065802 | 0.579 | 0.053 | 0         | 8 AL121999.1  |
| 0         | 0.882497192 | 0.732 | 0.193 | 0         | 8 ACOX1       |
| 2.15E-254 | 0.881743764 | 0.939 | 0.487 | 6.91E-250 | 8 DENND5B     |
| 0         | 0.881520507 | 0.608 | 0.069 | 0         | 8 ENPP6       |
| 0         | 0.880997465 | 0.812 | 0.259 | 0         | 8 ACSS2       |
| 1.32E-238 | 0.879515202 | 0.97  | 0.675 | 4.24E-234 | 8 NUMB        |
| 0         | 0.879340931 | 0.659 | 0.11  | 0         | 8 DPF3        |
| 0         | 0.879043201 | 0.782 | 0.227 | 0         | 8 EYA2        |
| 0         | 0.878691422 | 0.48  | 0.066 | 0         | 8 MT1X        |
| 0         | 0.87806777  | 1     | 0.965 | 0         | 8 ZBTB20      |
| 0         | 0.877461663 | 0.754 | 0.17  | 0         | 8 AC012651.1  |
| 0         | 0.876943943 | 0.617 | 0.078 | 0         | 8 SCN8A       |
| 8.28E-168 | 0.875885523 | 0.898 | 0.558 | 2.66E-163 | 8 RALYL       |
| 0         | 0.875192733 | 0.772 | 0.178 | 0         | 8 BAIAP2      |
| 0         | 0.874338783 | 0.69  | 0.103 | 0         | 8 SLC17A4     |
| 0         | 0.87316692  | 0.723 | 0.204 | 0         | 8 PFKFB2      |
| 5.35E-274 | 0.871683021 | 0.72  | 0.245 | 1.72E-269 | 8 SH3GL2      |
| 0         | 0.869770203 | 0.707 | 0.126 | 0         | 8 ABHD6       |
| 0         | 0.869491737 | 0.469 | 0.072 | 0         | 8 AC006305.1  |
| 0         | 0.868380642 | 0.681 | 0.153 | 0         | 8 DOK6        |
| 0         | 0.866674548 | 0.788 | 0.23  | 0         | 8 CNTN3       |
| 0         | 0.864564594 | 0.72  | 0.159 | 0         | 8 ABAT        |
| 0         | 0.863299523 | 0.826 | 0.301 | 0         | 8 GPR89B      |
| 4.30E-222 | 0.862725551 | 0.579 | 0.193 | 1.38E-217 | 8 REPS2       |
| 0         | 0.859510873 | 0.642 | 0.074 | 0         | 8 PNPLA3      |
| 0         | 0.858427684 | 0.436 | 0.017 | 0         | 8 CYP27B1     |
| 0         | 0.857706395 | 0.671 | 0.082 | 0         | 8 ESPN        |
| 0         | 0.857371691 | 0.606 | 0.135 | 0         | 8 MGST1       |
| 0         | 0.852809015 | 0.517 | 0.048 | 0         | 8 SLC22A7     |
| 0         | 0.852147998 | 0.564 | 0.113 | 0         | 8 BBOX1-AS1   |
| 5.60E-307 | 0.851223297 | 0.816 | 0.294 | 1.80E-302 | 8 HPCAL1      |
| 4.41E-185 | 0.850577743 | 0.607 | 0.244 | 1.42E-180 | 8 AC008581.2  |
| 1.86E-222 | 0.845616842 | 0.986 | 0.694 | 5.99E-218 | 8 UBE2E2      |
| 0         | 0.845194334 | 0.686 | 0.138 | 0         | 8 AL136234.1  |
| 0         | 0.84381303  | 0.766 | 0.236 | 0         | 8 PBLD        |
| 6.65E-165 | 0.84300525  | 0.921 | 0.593 | 2.14E-160 | 8 ULK4        |
| 1.77E-256 | 0.842631982 | 0.816 | 0.335 | 5.69E-252 | 8 TTC39B      |
| 0         | 0.8405873   | 0.869 | 0.26  | 0         | 8 CNTNAP3P2   |
| 0         | 0.833852297 | 0.638 | 0.075 | 0         | 8 SERPINF2    |

|           |             |       |       |           |              |
|-----------|-------------|-------|-------|-----------|--------------|
| 0         | 0.830876665 | 0.683 | 0.111 | 0         | 8 GGT1       |
| 1.91E-297 | 0.825322713 | 0.782 | 0.282 | 6.15E-293 | 8 C1GALT1    |
| 0         | 0.82358324  | 0.714 | 0.113 | 0         | 8 PC         |
| 0         | 0.821558867 | 0.686 | 0.126 | 0         | 8 EAF2       |
| 0         | 0.819673246 | 0.568 | 0.068 | 0         | 8 OSBPL6     |
| 0         | 0.817015638 | 0.431 | 0.053 | 0         | 8 MT1H       |
| 4.81E-303 | 0.816685864 | 0.716 | 0.219 | 1.55E-298 | 8 ARSB       |
| 8.92E-253 | 0.816099352 | 0.807 | 0.296 | 2.87E-248 | 8 NRP1       |
| 5.62E-203 | 0.814892228 | 0.619 | 0.22  | 1.81E-198 | 8 LINGO2     |
| 0         | 0.814316034 | 0.579 | 0.068 | 0         | 8 UGT2A3     |
| 1.05E-205 | 0.813203447 | 0.844 | 0.401 | 3.39E-201 | 8 PDK4       |
| 0         | 0.812579944 | 0.521 | 0.034 | 0         | 8 COMETT     |
| 2.08E-221 | 0.812526347 | 0.637 | 0.237 | 6.67E-217 | 8 PPP2R1B    |
| 2.06E-281 | 0.810949385 | 0.414 | 0.085 | 6.63E-277 | 8 LINC02196  |
| 1.38E-286 | 0.810680063 | 0.772 | 0.277 | 4.45E-282 | 8 FMO4       |
| 0         | 0.810524994 | 0.427 | 0.055 | 0         | 8 AJ009632.2 |
| 0         | 0.810521676 | 0.708 | 0.204 | 0         | 8 PRKCZ      |
| 4.83E-239 | 0.809611654 | 0.971 | 0.569 | 1.55E-234 | 8 AC068587.4 |
| 0         | 0.80822172  | 0.707 | 0.18  | 0         | 8 PECR       |
| 0         | 0.80781758  | 0.718 | 0.114 | 0         | 8 SH3BP2     |
| 0         | 0.807547615 | 0.726 | 0.207 | 0         | 8 MREG       |
| 0         | 0.806176    | 0.472 | 0.043 | 0         | 8 EPS15-AS1  |
| 0         | 0.803425598 | 0.432 | 0.021 | 0         | 8 FABP1      |
| 0         | 0.802765622 | 0.629 | 0.126 | 0         | 8 NABP1      |
| 1.07E-195 | 0.802279802 | 0.958 | 0.57  | 3.44E-191 | 8 MIR99AHG   |
| 3.40E-228 | 0.801377776 | 0.794 | 0.306 | 1.09E-223 | 8 AL033504.1 |
| 0         | 0.80133787  | 0.719 | 0.146 | 0         | 8 GALM       |
| 1.74E-197 | 0.801267922 | 0.984 | 0.732 | 5.58E-193 | 8 WDFY3      |
| 0         | 0.799045865 | 0.634 | 0.097 | 0         | 8 C4B        |
| 1.00E-301 | 0.798730666 | 0.782 | 0.252 | 3.21E-297 | 8 CTTNBP2    |
| 2.62E-139 | 0.798563462 | 0.903 | 0.544 | 8.40E-135 | 8 P3H2       |
| 0         | 0.79714418  | 0.497 | 0.045 | 0         | 8 AC018709.1 |
| 1.77E-236 | 0.790615986 | 0.838 | 0.375 | 5.70E-232 | 8 ACAD11     |
| 0         | 0.787515051 | 0.536 | 0.1   | 0         | 8 PEMT       |
| 0         | 0.787251283 | 0.603 | 0.069 | 0         | 8 IYD        |
| 0         | 0.786320536 | 0.496 | 0.025 | 0         | 8 KCNH6      |
| 0         | 0.785133341 | 0.713 | 0.14  | 0         | 8 SLC34A1    |
| 4.71E-291 | 0.781635618 | 0.752 | 0.256 | 1.51E-286 | 8 PTGR1      |
| 5.89E-152 | 0.777289797 | 0.97  | 0.719 | 1.89E-147 | 8 AC008014.1 |
| 5.58E-218 | 0.777228144 | 0.893 | 0.464 | 1.79E-213 | 8 SGK3       |
| 0         | 0.773417562 | 0.427 | 0.026 | 0         | 8 TSKU       |
| 6.98E-185 | 0.772878911 | 0.915 | 0.502 | 2.24E-180 | 8 ST7        |
| 0         | 0.769890381 | 0.941 | 0.214 | 0         | 8 PRODH2     |
| 0         | 0.767879386 | 0.647 | 0.098 | 0         | 8 GPT2       |
| 1.49E-228 | 0.763464298 | 0.873 | 0.391 | 4.78E-224 | 8 SPATS2L    |
| 0         | 0.762636401 | 0.63  | 0.077 | 0         | 8 TFEC       |
| 0         | 0.76177724  | 0.541 | 0.1   | 0         | 8 AC018467.1 |
| 1.64E-167 | 0.760810899 | 0.948 | 0.623 | 5.28E-163 | 8 CRADD      |
| 5.00E-282 | 0.75910688  | 0.753 | 0.263 | 1.60E-277 | 8 L2HGDH     |
| 0         | 0.758933604 | 0.53  | 0.028 | 0         | 8 LINC00955  |
| 0         | 0.758817763 | 0.393 | 0.03  | 0         | 8 AC128707.1 |

|           |             |       |       |           |               |
|-----------|-------------|-------|-------|-----------|---------------|
| 7.55E-231 | 0.758292503 | 0.924 | 0.424 | 2.42E-226 | 8 GALNT14     |
| 0         | 0.755494466 | 0.484 | 0.045 | 0         | 8 PSAT1       |
| 1.18E-199 | 0.755344536 | 0.886 | 0.46  | 3.78E-195 | 8 RORA-AS1    |
| 2.31E-181 | 0.753968451 | 0.838 | 0.412 | 7.42E-177 | 8 KIAA0825    |
| 0         | 0.753689419 | 0.793 | 0.18  | 0         | 8 MLXIPL      |
| 0         | 0.752436476 | 0.828 | 0.229 | 0         | 8 TNIK        |
| 5.56E-242 | 0.751882012 | 0.686 | 0.24  | 1.79E-237 | 8 ENPP3       |
| 9.67E-265 | 0.750667624 | 0.797 | 0.277 | 3.10E-260 | 8 ALCAM       |
| 0         | 0.750604776 | 0.519 | 0.037 | 0         | 8 OR2T10      |
| 0         | 0.749486066 | 0.579 | 0.065 | 0         | 8 ALDH8A1     |
| 0         | 0.748693531 | 0.73  | 0.209 | 0         | 8 NR1H4       |
| 0         | 0.746039491 | 0.64  | 0.114 | 0         | 8 CMBL        |
| 0         | 0.74577765  | 0.675 | 0.161 | 0         | 8 ABI3BP      |
| 1.44E-146 | 0.744210282 | 0.975 | 0.656 | 4.61E-142 | 8 NHS         |
| 8.80E-293 | 0.743216836 | 0.742 | 0.239 | 2.83E-288 | 8 LSP1P5      |
| 8.45E-289 | 0.7419393   | 0.766 | 0.274 | 2.71E-284 | 8 GPR89A      |
| 0         | 0.741773079 | 0.715 | 0.1   | 0         | 8 SLC22A11    |
| 0         | 0.741295238 | 0.86  | 0.262 | 0         | 8 UGT2B7      |
| 0         | 0.738089374 | 0.6   | 0.068 | 0         | 8 ADORA2A-AS1 |
| 3.86E-91  | 0.737412559 | 0.499 | 0.225 | 1.24E-86  | 8 C1QTNF7-AS1 |
| 1.79E-161 | 0.736821656 | 0.778 | 0.355 | 5.74E-157 | 8 AC004593.2  |
| 8.15E-283 | 0.731401951 | 0.735 | 0.24  | 2.62E-278 | 8 LSP1P4      |
| 5.81E-147 | 0.730850125 | 0.37  | 0.112 | 1.87E-142 | 8 LINC00907   |
| 0         | 0.73081552  | 0.575 | 0.097 | 0         | 8 KYNU        |
| 4.03E-157 | 0.730432712 | 0.91  | 0.513 | 1.29E-152 | 8 TLN2        |
| 0         | 0.727417885 | 0.692 | 0.146 | 0         | 8 SPATA22     |
| 6.91E-192 | 0.726647298 | 0.906 | 0.498 | 2.22E-187 | 8 MICU1       |
| 1.01E-193 | 0.724954774 | 0.941 | 0.57  | 3.24E-189 | 8 HIBCH       |
| 7.44E-278 | 0.724162513 | 0.676 | 0.224 | 2.39E-273 | 8 SNX5        |
| 0         | 0.724032334 | 0.417 | 0.042 | 0         | 8 GDNF-AS1    |
| 6.72E-240 | 0.723949192 | 0.793 | 0.314 | 2.16E-235 | 8 OSBPL1A     |
| 3.86E-282 | 0.72350022  | 0.774 | 0.266 | 1.24E-277 | 8 MALT1       |
| 2.53E-197 | 0.723122145 | 0.891 | 0.474 | 8.11E-193 | 8 ATXN7L1     |
| 0         | 0.722534762 | 0.54  | 0.036 | 0         | 8 AC137056.2  |
| 1.36E-256 | 0.721878594 | 0.806 | 0.316 | 4.36E-252 | 8 PDPR        |
| 0         | 0.721369664 | 0.524 | 0.083 | 0         | 8 GCH1        |
| 1.58E-274 | 0.72100333  | 0.479 | 0.112 | 5.09E-270 | 8 SPSB1       |
| 0         | 0.719199829 | 0.726 | 0.19  | 0         | 8 TRPV1       |
| 0         | 0.719138126 | 0.51  | 0.069 | 0         | 8 CD226       |
| 7.88E-289 | 0.717744934 | 0.77  | 0.271 | 2.53E-284 | 8 STX3        |
| 0         | 0.717114889 | 0.641 | 0.174 | 0         | 8 TCP11L1     |
| 0         | 0.716369598 | 0.664 | 0.158 | 0         | 8 FTL         |
| 2.84E-173 | 0.714103592 | 0.715 | 0.301 | 9.12E-169 | 8 AC104123.1  |
| 9.20E-247 | 0.712948049 | 0.805 | 0.312 | 2.96E-242 | 8 KIF21A      |
| 0         | 0.711239395 | 0.474 | 0.074 | 0         | 8 ENPP1       |
| 1.94E-206 | 0.711106216 | 0.953 | 0.575 | 6.23E-202 | 8 VPS13A      |
| 0         | 0.710590929 | 0.698 | 0.191 | 0         | 8 ENTPD5      |
| 8.95E-294 | 0.709736662 | 0.775 | 0.262 | 2.87E-289 | 8 CELSR1      |
| 0         | 0.709406917 | 0.973 | 0.461 | 0         | 8 SLIT2       |
| 6.41E-261 | 0.707343577 | 0.836 | 0.34  | 2.06E-256 | 8 ENPP7P6     |
| 0         | 0.705926775 | 0.641 | 0.07  | 0         | 8 SLC39A5     |

|           |             |       |       |           |              |
|-----------|-------------|-------|-------|-----------|--------------|
| 9.71E-163 | 0.705397129 | 0.72  | 0.334 | 3.12E-158 | 8 CNTLN      |
| 1.88E-246 | 0.704365222 | 0.778 | 0.305 | 6.04E-242 | 8 NFATC3     |
| 0         | 0.70246773  | 0.684 | 0.177 | 0         | 8 FIGN       |
| 0         | 0.701698491 | 0.629 | 0.119 | 0         | 8 HDHD3      |
| 1.86E-152 | 0.70063419  | 0.986 | 0.694 | 5.96E-148 | 8 FRAS1      |
| 1.54E-219 | 0.698361163 | 0.796 | 0.32  | 4.95E-215 | 8 USP9Y      |
| 9.55E-202 | 0.697137135 | 0.779 | 0.333 | 3.07E-197 | 8 STON2      |
| 0         | 0.696406967 | 0.647 | 0.107 | 0         | 8 PRSS51     |
| 4.01E-292 | 0.695772683 | 0.69  | 0.206 | 1.29E-287 | 8 AC010894.2 |
| 0         | 0.694790524 | 0.517 | 0.104 | 0         | 8 CCDC162P   |
| 0         | 0.691734313 | 0.774 | 0.208 | 0         | 8 CNTNAP3    |
| 1.57E-227 | 0.691423953 | 0.76  | 0.308 | 5.05E-223 | 8 WBP1L      |
| 1.89E-138 | 0.690201034 | 0.698 | 0.321 | 6.09E-134 | 8 AC034195.1 |
| 3.27E-157 | 0.68940329  | 0.972 | 0.691 | 1.05E-152 | 8 VWA8       |
| 0         | 0.687820653 | 0.623 | 0.103 | 0         | 8 AC009053.3 |
| 0         | 0.68771194  | 0.62  | 0.075 | 0         | 8 CLEC18C    |
| 6.05E-184 | 0.687683937 | 0.814 | 0.382 | 1.94E-179 | 8 MAP3K5     |
| 1.21E-256 | 0.687446694 | 0.72  | 0.253 | 3.87E-252 | 8 RFFL       |
| 0         | 0.687228322 | 0.379 | 0.062 | 0         | 8 FER1L6     |
| 1.98E-179 | 0.68635611  | 0.907 | 0.489 | 6.37E-175 | 8 AUTS2      |
| 5.68E-195 | 0.684759229 | 0.864 | 0.429 | 1.82E-190 | 8 PUM3       |
| 0         | 0.684458369 | 0.606 | 0.093 | 0         | 8 TTYH3      |
| 0         | 0.681294379 | 0.61  | 0.109 | 0         | 8 GGT3P      |
| 0         | 0.680217355 | 0.616 | 0.114 | 0         | 8 RSAD1      |
| 0         | 0.680084925 | 0.636 | 0.154 | 0         | 8 ATP6V1B2   |
| 1.58E-229 | 0.67955283  | 0.656 | 0.22  | 5.06E-225 | 8 DIRC3      |
| 3.07E-210 | 0.679398992 | 0.686 | 0.248 | 9.86E-206 | 8 SLC7A8     |
| 1.16E-261 | 0.678854776 | 0.708 | 0.238 | 3.73E-257 | 8 MAST2      |
| 0         | 0.678673552 | 0.606 | 0.098 | 0         | 8 AC009060.1 |
| 0         | 0.677181771 | 0.591 | 0.12  | 0         | 8 CTSB       |
| 0         | 0.676087411 | 0.694 | 0.179 | 0         | 8 PXYLP1     |
| 1.08E-154 | 0.67608177  | 0.89  | 0.497 | 3.48E-150 | 8 NT5DC1     |
| 0         | 0.676073752 | 0.35  | 0.048 | 0         | 8 PRPS1      |
| 0         | 0.674919787 | 0.534 | 0.051 | 0         | 8 ETNK2      |
| 0         | 0.672261933 | 0.731 | 0.219 | 0         | 8 ABR        |
| 0         | 0.671466878 | 0.517 | 0.071 | 0         | 8 GGT2       |
| 1.18E-179 | 0.666916047 | 0.85  | 0.428 | 3.80E-175 | 8 SLC39A11   |
| 2.88E-247 | 0.666514788 | 0.674 | 0.233 | 9.24E-243 | 8 SRPK1      |
| 0         | 0.665327302 | 0.477 | 0.039 | 0         | 8 CTSL3P     |
| 0         | 0.664836208 | 0.599 | 0.134 | 0         | 8 GPR135     |
| 0         | 0.664333935 | 0.675 | 0.18  | 0         | 8 CAMK2G     |
| 0         | 0.664320603 | 0.493 | 0.058 | 0         | 8 PPARGC1B   |
| 1.20E-141 | 0.664213018 | 0.98  | 0.76  | 3.85E-137 | 8 AFF1       |
| 5.27E-196 | 0.663864398 | 1     | 0.918 | 1.69E-191 | 8 FHIT       |
| 0         | 0.662467793 | 0.679 | 0.165 | 0         | 8 NEDD4      |
| 0         | 0.661072064 | 0.489 | 0.075 | 0         | 8 PROS1      |
| 1.07E-182 | 0.660752369 | 0.912 | 0.511 | 3.45E-178 | 8 LARP4      |
| 1.47E-191 | 0.660408057 | 0.662 | 0.247 | 4.73E-187 | 8 EDA        |
| 2.08E-192 | 0.659540791 | 0.779 | 0.325 | 6.68E-188 | 8 SLC16A10   |
| 1.47E-147 | 0.658210287 | 0.672 | 0.303 | 4.72E-143 | 8 RSU1       |
| 0         | 0.658137208 | 0.668 | 0.117 | 0         | 8 CLEC18B    |

|           |             |       |       |           |               |
|-----------|-------------|-------|-------|-----------|---------------|
| 0         | 0.655906297 | 0.553 | 0.082 | 0         | 8 BIN1        |
| 7.51E-258 | 0.655783492 | 0.78  | 0.283 | 2.41E-253 | 8 AC126283.2  |
| 0         | 0.654745134 | 0.569 | 0.062 | 0         | 8 KCNAB2      |
| 1.06E-291 | 0.654555256 | 0.663 | 0.201 | 3.41E-287 | 8 CAT         |
| 7.17E-200 | 0.653240852 | 0.891 | 0.446 | 2.30E-195 | 8 FBXO21      |
| 5.80E-166 | 0.652628244 | 0.708 | 0.293 | 1.86E-161 | 8 AC087564.1  |
| 0         | 0.652576366 | 0.602 | 0.086 | 0         | 8 MYO7B       |
| 0         | 0.652276167 | 0.672 | 0.158 | 0         | 8 ERBB3       |
| 9.83E-179 | 0.652086948 | 0.78  | 0.363 | 3.16E-174 | 8 ACVR1       |
| 3.04E-209 | 0.652044656 | 0.615 | 0.221 | 9.75E-205 | 8 AC010210.1  |
| 1.80E-192 | 0.651920486 | 0.673 | 0.265 | 5.78E-188 | 8 GLCE        |
| 0         | 0.651292949 | 0.799 | 0.254 | 0         | 8 AFMID       |
| 7.55E-302 | 0.65078939  | 0.69  | 0.207 | 2.43E-297 | 8 RASSF8-AS1  |
| 1.91E-290 | 0.650067557 | 0.636 | 0.185 | 6.13E-286 | 8 KLF13       |
| 0         | 0.649450325 | 0.648 | 0.178 | 0         | 8 RPS4Y1      |
| 1.10E-283 | 0.648589308 | 0.639 | 0.186 | 3.52E-279 | 8 ALDH7A1     |
| 3.11E-138 | 0.646996585 | 0.929 | 0.605 | 9.98E-134 | 8 TSPAN9      |
| 0         | 0.646504008 | 0.489 | 0.048 | 0         | 8 OR2G6       |
| 7.77E-201 | 0.644402628 | 0.782 | 0.346 | 2.50E-196 | 8 LAMTOR5-AS1 |
| 0         | 0.644165744 | 0.52  | 0.093 | 0         | 8 PLEKHF2     |
| 9.42E-186 | 0.642613165 | 0.809 | 0.381 | 3.02E-181 | 8 STX7        |
| 2.56E-151 | 0.642567718 | 0.905 | 0.526 | 8.21E-147 | 8 KIAA1958    |
| 0         | 0.641021962 | 0.58  | 0.1   | 0         | 8 SLC6A12     |
| 0         | 0.641007366 | 0.336 | 0.039 | 0         | 8 LINC02220   |
| 3.73E-165 | 0.640787367 | 0.986 | 0.765 | 1.20E-160 | 8 CUX1        |
| 0         | 0.640242078 | 0.609 | 0.111 | 0         | 8 ADGRG5      |
| 0         | 0.640226815 | 0.565 | 0.106 | 0         | 8 SLC25A44    |
| 0         | 0.640094724 | 0.628 | 0.127 | 0         | 8 BCAT2       |
| 7.10E-252 | 0.639198352 | 0.626 | 0.185 | 2.28E-247 | 8 ROR1        |
| 4.46E-274 | 0.639134242 | 0.569 | 0.156 | 1.43E-269 | 8 E2F3        |
| 8.37E-182 | 0.63896114  | 0.845 | 0.416 | 2.69E-177 | 8 AGPAT3      |
| 0         | 0.636176984 | 0.676 | 0.173 | 0         | 8 LRP5        |
| 7.30E-173 | 0.635528184 | 0.851 | 0.43  | 2.34E-168 | 8 LCLAT1      |
| 0         | 0.632962938 | 0.542 | 0.11  | 0         | 8 FLVCR2      |
| 1.90E-174 | 0.631445302 | 0.883 | 0.45  | 6.09E-170 | 8 COBL        |
| 0         | 0.630382181 | 0.523 | 0.102 | 0         | 8 EPSTI1      |
| 0         | 0.630246373 | 0.41  | 0.038 | 0         | 8 GGT4P       |
| 0         | 0.630065956 | 0.785 | 0.226 | 0         | 8 TGFB3       |
| 0         | 0.629441407 | 0.732 | 0.214 | 0         | 8 DHTKD1      |
| 1.40E-167 | 0.628411828 | 0.868 | 0.476 | 4.50E-163 | 8 TBC1D19     |
| 0         | 0.628079492 | 0.515 | 0.086 | 0         | 8 SCN9A       |
| 7.27E-242 | 0.627455361 | 0.808 | 0.318 | 2.33E-237 | 8 EPHX2       |
| 1.84E-232 | 0.625796653 | 0.845 | 0.341 | 5.90E-228 | 8 ALDH1L1     |
| 2.31E-188 | 0.625699524 | 0.969 | 0.616 | 7.41E-184 | 8 PBX1        |
| 3.77E-136 | 0.625691092 | 0.917 | 0.568 | 1.21E-131 | 8 NT5C2       |
| 1.30E-195 | 0.624790975 | 0.774 | 0.339 | 4.19E-191 | 8 TTC21B      |
| 0         | 0.624424961 | 0.551 | 0.109 | 0         | 8 IDH1        |
| 1.43E-246 | 0.622146882 | 0.724 | 0.255 | 4.60E-242 | 8 GANC        |
| 1.11E-87  | 0.62203309  | 0.543 | 0.26  | 3.55E-83  | 8 NRG1        |
| 5.84E-135 | 0.621949952 | 0.948 | 0.636 | 1.88E-130 | 8 PTPRK       |
| 0         | 0.621654458 | 0.459 | 0.035 | 0         | 8 OR2T2       |



|           |             |       |       |           |              |
|-----------|-------------|-------|-------|-----------|--------------|
| 2.60E-202 | 0.621179273 | 0.791 | 0.355 | 8.34E-198 | 8 HMGN3      |
| 0         | 0.620862048 | 0.577 | 0.109 | 0         | 8 BX005040.4 |
| 1.66E-179 | 0.620104496 | 0.76  | 0.335 | 5.34E-175 | 8 NRIP1      |
| 0         | 0.618131016 | 0.428 | 0.032 | 0         | 8 ADRA1B     |
| 1.52E-143 | 0.61807349  | 0.874 | 0.509 | 4.87E-139 | 8 IFT88      |
| 0         | 0.617916197 | 0.573 | 0.139 | 0         | 8 ABCA1      |
| 0         | 0.617392026 | 0.546 | 0.072 | 0         | 8 SLC7A9     |
| 1.46E-297 | 0.617343139 | 0.581 | 0.154 | 4.68E-293 | 8 TMMEM63A   |
| 1.66E-173 | 0.616252694 | 0.813 | 0.378 | 5.35E-169 | 8 ACSS3      |
| 0         | 0.614600154 | 0.505 | 0.071 | 0         | 8 SDC1       |
| 2.96E-131 | 0.613933834 | 0.907 | 0.58  | 9.51E-127 | 8 SEC31A     |
| 5.11E-156 | 0.613819703 | 0.749 | 0.373 | 1.64E-151 | 8 BMS1P1     |
| 0         | 0.613683242 | 0.347 | 0.039 | 0         | 8 TYR        |
| 1.38E-155 | 0.61216221  | 0.877 | 0.487 | 4.44E-151 | 8 ABCD3      |
| 0         | 0.611506785 | 0.543 | 0.116 | 0         | 8 GRTP1      |
| 0         | 0.61068943  | 0.481 | 0.038 | 0         | 8 PCK2       |
| 0         | 0.610282233 | 0.562 | 0.081 | 0         | 8 SLC26A6    |
| 0         | 0.610113086 | 0.608 | 0.153 | 0         | 8 HADH       |
| 0         | 0.608725762 | 0.504 | 0.065 | 0         | 8 PGAP4      |
| 4.74E-111 | 0.607824502 | 0.991 | 0.803 | 1.52E-106 | 8 PRKN       |
| 0         | 0.606955898 | 0.437 | 0.03  | 0         | 8 R3HDML     |
| 3.60E-211 | 0.606267069 | 0.727 | 0.283 | 1.16E-206 | 8 CHPT1      |
| 4.61E-215 | 0.605969511 | 0.329 | 0.068 | 1.48E-210 | 8 AC024230.1 |
| 0         | 0.605191317 | 0.549 | 0.107 | 0         | 8 DCXR       |
| 4.58E-203 | 0.605124864 | 0.992 | 0.714 | 1.47E-198 | 8 DIP2C      |
| 4.71E-158 | 0.604687811 | 0.833 | 0.436 | 1.51E-153 | 8 MSH3       |
| 3.13E-177 | 0.604133396 | 0.869 | 0.412 | 1.01E-172 | 8 BICDL1     |
| 0         | 0.602001775 | 0.509 | 0.052 | 0         | 8 XPNPEP2    |
| 0         | 0.599318373 | 0.471 | 0.064 | 0         | 8 FMO1       |
| 1.27E-257 | 0.598717365 | 0.687 | 0.217 | 4.07E-253 | 8 DZIP1      |
| 1.37E-205 | 0.598329578 | 0.786 | 0.333 | 4.40E-201 | 8 ATP6V0A1   |
| 0         | 0.598082459 | 0.457 | 0.071 | 0         | 8 KMO        |
| 9.31E-261 | 0.596791882 | 0.674 | 0.22  | 2.99E-256 | 8 DNAJC16    |
| 0         | 0.596058319 | 0.485 | 0.068 | 0         | 8 RIDA       |
| 2.72E-10  | 0.595681869 | 0.313 | 0.234 | 8.75E-06  | 8 ANKS1B     |
| 1.13E-130 | 0.595470406 | 0.951 | 0.651 | 3.63E-126 | 8 DENND1A    |
| 3.80E-166 | 0.594855708 | 0.92  | 0.542 | 1.22E-161 | 8 ECHDC2     |
| 1.75E-153 | 0.594246648 | 0.67  | 0.291 | 5.61E-149 | 8 PALM2AKAP2 |
| 4.78E-288 | 0.593806372 | 0.728 | 0.233 | 1.54E-283 | 8 C11orf54   |
| 9.42E-245 | 0.593447977 | 0.437 | 0.105 | 3.03E-240 | 8 LRRC7      |
| 1.69E-244 | 0.593246347 | 0.726 | 0.245 | 5.41E-240 | 8 AC008554.1 |
| 0         | 0.592801638 | 0.641 | 0.176 | 0         | 8 NIT2       |
| 0         | 0.592616069 | 0.637 | 0.112 | 0         | 8 PRR5       |
| 1.85E-261 | 0.59255767  | 0.569 | 0.158 | 5.95E-257 | 8 KCNC3      |
| 0         | 0.592369671 | 0.427 | 0.064 | 0         | 8 COL19A1    |
| 4.73E-202 | 0.592253573 | 0.748 | 0.292 | 1.52E-197 | 8 ADCY9      |
| 7.69E-155 | 0.592238189 | 0.805 | 0.391 | 2.47E-150 | 8 TPD52      |
| 2.35E-150 | 0.591463203 | 0.997 | 0.859 | 7.55E-146 | 8 ANK3       |
| 0         | 0.591273221 | 0.491 | 0.09  | 0         | 8 C10orf67   |
| 2.11E-240 | 0.590881612 | 0.777 | 0.299 | 6.77E-236 | 8 KLHL20     |
| 4.98E-141 | 0.590877191 | 0.794 | 0.391 | 1.60E-136 | 8 ASTN2      |

|           |             |       |       |           |              |
|-----------|-------------|-------|-------|-----------|--------------|
| 0         | 0.590387079 | 0.396 | 0.019 | 0         | 8 NAT8       |
| 0         | 0.590079158 | 0.649 | 0.152 | 0         | 8 SLC12A7    |
| 0         | 0.590070493 | 0.476 | 0.075 | 0         | 8 UGT3A1     |
| 3.35E-147 | 0.589799931 | 0.894 | 0.507 | 1.08E-142 | 8 FANCC      |
| 2.32E-134 | 0.58866487  | 0.898 | 0.557 | 7.45E-130 | 8 TYW1       |
| 2.66E-154 | 0.588085058 | 0.733 | 0.332 | 8.53E-150 | 8 HS2ST1     |
| 0         | 0.587313241 | 0.623 | 0.118 | 0         | 8 AKR1A1     |
| 1.26E-119 | 0.586231194 | 0.844 | 0.492 | 4.06E-115 | 8 KIFC3      |
| 0         | 0.583996791 | 0.551 | 0.116 | 0         | 8 TUB        |
| 3.28E-281 | 0.58339059  | 0.48  | 0.111 | 1.05E-276 | 8 RAB20      |
| 0         | 0.582968184 | 0.605 | 0.139 | 0         | 8 RGN        |
| 0         | 0.581436541 | 0.471 | 0.098 | 0         | 8 NHEJ1      |
| 0         | 0.579359176 | 0.487 | 0.085 | 0         | 8 PLAAT3     |
| 0         | 0.57774762  | 0.432 | 0.06  | 0         | 8 AC113386.1 |
| 5.28E-182 | 0.577617965 | 0.753 | 0.307 | 1.69E-177 | 8 SLC22A23   |
| 0         | 0.577495965 | 0.56  | 0.075 | 0         | 8 ABCC6P1    |
| 7.95E-131 | 0.577244735 | 0.93  | 0.608 | 2.55E-126 | 8 KCNQ1OT1   |
| 0         | 0.577182426 | 0.776 | 0.221 | 0         | 8 FAM20C     |
| 1.45E-148 | 0.57665634  | 0.968 | 0.68  | 4.67E-144 | 8 AKAP13     |
| 1.04E-255 | 0.576479519 | 0.404 | 0.087 | 3.34E-251 | 8 UNC79      |
| 1.50E-131 | 0.575777465 | 0.956 | 0.628 | 4.82E-127 | 8 TTC28      |
| 0         | 0.574979681 | 0.568 | 0.133 | 0         | 8 PHYHIPL    |
| 3.28E-259 | 0.574925255 | 0.732 | 0.23  | 1.05E-254 | 8 DOCK8      |
| 5.38E-178 | 0.574529464 | 0.844 | 0.414 | 1.73E-173 | 8 LARP1      |
| 1.70E-152 | 0.574055918 | 0.661 | 0.28  | 5.45E-148 | 8 CEMIP2     |
| 0         | 0.572676479 | 0.422 | 0.052 | 0         | 8 GSTA2      |
| 0         | 0.572612988 | 0.447 | 0.036 | 0         | 8 DEPDC7     |
| 1.28E-162 | 0.57216969  | 0.861 | 0.455 | 4.12E-158 | 8 ADD1       |
| 0         | 0.571113548 | 0.477 | 0.046 | 0         | 8 DIO1       |
| 0         | 0.570812295 | 0.502 | 0.092 | 0         | 8 PCTP       |
| 0         | 0.569133954 | 0.592 | 0.147 | 0         | 8 KLKB1      |
| 0         | 0.568849767 | 0.506 | 0.079 | 0         | 8 GATM       |
| 0         | 0.568510595 | 0.556 | 0.116 | 0         | 8 DLGAP2     |
| 0         | 0.568214895 | 0.432 | 0.043 | 0         | 8 NAPSA      |
| 1.25E-149 | 0.568090514 | 0.779 | 0.38  | 4.00E-145 | 8 LRRC28     |
| 1.67E-181 | 0.567628803 | 0.585 | 0.213 | 5.35E-177 | 8 ERO1B      |
| 3.45E-161 | 0.567597663 | 0.848 | 0.397 | 1.11E-156 | 8 GHR        |
| 0         | 0.566676613 | 0.41  | 0.027 | 0         | 8 OR2T35     |
| 0         | 0.566306333 | 0.471 | 0.074 | 0         | 8 LINC02794  |
| 4.76E-256 | 0.566127743 | 0.495 | 0.127 | 1.53E-251 | 8 GNA12      |
| 2.56E-224 | 0.565926271 | 0.669 | 0.229 | 8.23E-220 | 8 AC006994.1 |
| 0         | 0.563907126 | 0.483 | 0.054 | 0         | 8 CYP4Z2P    |
| 1.12E-193 | 0.563352331 | 0.704 | 0.288 | 3.60E-189 | 8 ACADM      |
| 1.26E-149 | 0.563193123 | 0.442 | 0.148 | 4.04E-145 | 8 LINC00598  |
| 9.49E-303 | 0.562765738 | 0.288 | 0.038 | 3.05E-298 | 8 AC124854.1 |
| 2.83E-214 | 0.56091751  | 0.511 | 0.151 | 9.09E-210 | 8 FTCDNL1    |
| 0         | 0.560305118 | 0.411 | 0.05  | 0         | 8 AL034417.4 |
| 1.22E-225 | 0.55987706  | 0.59  | 0.188 | 3.93E-221 | 8 PTP4A1     |
| 1.77E-132 | 0.558882353 | 0.727 | 0.359 | 5.68E-128 | 8 DERA       |
| 4.95E-157 | 0.558158368 | 0.761 | 0.364 | 1.59E-152 | 8 PTPN1      |
| 5.02E-138 | 0.557161618 | 0.938 | 0.61  | 1.61E-133 | 8 DMXL1      |

|           |             |       |       |           |              |
|-----------|-------------|-------|-------|-----------|--------------|
| 0         | 0.556841327 | 0.505 | 0.073 | 0         | 8 ACOX2      |
| 8.91E-158 | 0.554469666 | 1     | 0.91  | 2.86E-153 | 8 GPHN       |
| 4.91E-114 | 0.554446214 | 0.904 | 0.546 | 1.58E-109 | 8 FNIP2      |
| 2.96E-220 | 0.553712042 | 0.695 | 0.252 | 9.52E-216 | 8 UTP4       |
| 9.30E-95  | 0.552779914 | 0.944 | 0.687 | 2.99E-90  | 8 TEAD1      |
| 4.07E-108 | 0.552768347 | 0.901 | 0.566 | 1.31E-103 | 8 TFDP2      |
| 2.03E-228 | 0.552242518 | 0.556 | 0.171 | 6.52E-224 | 8 MAT2A      |
| 7.91E-165 | 0.551311864 | 0.74  | 0.33  | 2.54E-160 | 8 PCBP1-AS1  |
| 5.32E-149 | 0.550945542 | 0.997 | 0.869 | 1.71E-144 | 8 LPP        |
| 0         | 0.550777421 | 0.596 | 0.145 | 0         | 8 MFSD4B     |
| 0         | 0.548235863 | 0.494 | 0.071 | 0         | 8 RBP5       |
| 2.18E-228 | 0.547292662 | 0.325 | 0.064 | 7.00E-224 | 8 AC046195.1 |
| 9.02E-129 | 0.546778425 | 0.861 | 0.496 | 2.90E-124 | 8 MIR29B2CHG |
| 0         | 0.545489498 | 0.444 | 0.042 | 0         | 8 PIPOX      |
| 0         | 0.545407108 | 0.501 | 0.082 | 0         | 8 TMEM37     |
| 0         | 0.543806694 | 0.486 | 0.063 | 0         | 8 SLC5A10    |
| 1.38E-159 | 0.543623459 | 0.782 | 0.345 | 4.42E-155 | 8 DGKH       |
| 4.44E-172 | 0.543264666 | 0.579 | 0.21  | 1.43E-167 | 8 SOBP       |
| 0         | 0.542891653 | 0.665 | 0.18  | 0         | 8 HAGH       |
| 0         | 0.540358199 | 0.431 | 0.066 | 0         | 8 SLC36A1    |
| 1.82E-270 | 0.540184512 | 0.562 | 0.149 | 5.84E-266 | 8 NECTIN3    |
| 0         | 0.539835155 | 0.482 | 0.063 | 0         | 8 LINC02754  |
| 2.34E-142 | 0.539354468 | 1     | 0.859 | 7.53E-138 | 8 PATJ       |
| 0         | 0.538613899 | 0.612 | 0.142 | 0         | 8 PGPEP1     |
| 2.77E-167 | 0.538329483 | 0.698 | 0.295 | 8.90E-163 | 8 BEND7      |
| 3.27E-125 | 0.538213108 | 0.89  | 0.448 | 1.05E-120 | 8 UTU        |
| 1.61E-234 | 0.537544228 | 0.472 | 0.12  | 5.18E-230 | 8 MGAM       |
| 5.88E-205 | 0.537519884 | 0.613 | 0.208 | 1.89E-200 | 8 AGPAT5     |
| 0         | 0.537054878 | 0.563 | 0.082 | 0         | 8 CDHR5      |
| 3.53E-153 | 0.536388491 | 0.839 | 0.431 | 1.14E-148 | 8 PLEKHA1    |
| 4.07E-121 | 0.535646376 | 0.728 | 0.364 | 1.31E-116 | 8 C2orf88    |
| 9.05E-186 | 0.535060017 | 0.72  | 0.291 | 2.91E-181 | 8 BMP2K      |
| 2.94E-200 | 0.535000085 | 0.647 | 0.235 | 9.44E-196 | 8 EEFSEC     |
| 0         | 0.5314579   | 0.518 | 0.099 | 0         | 8 AC027796.3 |
| 1.60E-133 | 0.531456892 | 0.799 | 0.386 | 5.15E-129 | 8 PDZRN3     |
| 4.30E-113 | 0.530819711 | 0.998 | 0.842 | 1.38E-108 | 8 LRMDA      |
| 2.90E-261 | 0.530544197 | 0.512 | 0.131 | 9.31E-257 | 8 PUS10      |
| 1.47E-229 | 0.530470266 | 0.576 | 0.169 | 4.72E-225 | 8 MPP6       |
| 1.14E-115 | 0.530122997 | 0.92  | 0.572 | 3.67E-111 | 8 PTPRJ      |
| 0         | 0.52929801  | 0.487 | 0.1   | 0         | 8 L3HYPDH    |
| 5.00E-204 | 0.529176572 | 0.469 | 0.132 | 1.61E-199 | 8 CLSTN2     |
| 4.95E-113 | 0.529044369 | 0.978 | 0.695 | 1.59E-108 | 8 RBM47      |
| 3.23E-124 | 0.528214435 | 0.386 | 0.13  | 1.04E-119 | 8 GABRB3     |
| 0         | 0.527767227 | 0.522 | 0.064 | 0         | 8 TMEM106A   |
| 0         | 0.527354271 | 0.415 | 0.055 | 0         | 8 TRIM71     |
| 6.64E-210 | 0.527324044 | 0.713 | 0.264 | 2.13E-205 | 8 DIXDC1     |
| 2.74E-142 | 0.52718922  | 0.875 | 0.475 | 8.79E-138 | 8 SH3D19     |
| 3.29E-130 | 0.525867076 | 0.901 | 0.528 | 1.06E-125 | 8 SLC25A13   |
| 3.51E-132 | 0.520440282 | 0.867 | 0.483 | 1.13E-127 | 8 OSBPL8     |
| 1.34E-224 | 0.519570933 | 0.584 | 0.178 | 4.31E-220 | 8 LRIG3      |
| 2.19E-211 | 0.518927752 | 0.669 | 0.241 | 7.03E-207 | 8 CYP4V2     |

|           |             |       |       |           |              |
|-----------|-------------|-------|-------|-----------|--------------|
| 0         | 0.518889561 | 0.439 | 0.032 | 0         | 8 ACMSD      |
| 1.65E-138 | 0.518760762 | 0.721 | 0.347 | 5.31E-134 | 8 MDM2       |
| 0         | 0.518636154 | 0.607 | 0.15  | 0         | 8 FAM102A    |
| 0         | 0.51779803  | 0.274 | 0.03  | 0         | 8 IRGM       |
| 0         | 0.517574003 | 0.415 | 0.06  | 0         | 8 IFIT1      |
| 0         | 0.517402321 | 0.449 | 0.078 | 0         | 8 GLI3       |
| 0         | 0.517138025 | 0.489 | 0.084 | 0         | 8 ACAA1      |
| 0         | 0.516834592 | 0.448 | 0.056 | 0         | 8 NGEF       |
| 0         | 0.516825713 | 0.381 | 0.039 | 0         | 8 AC118942.1 |
| 0         | 0.516610936 | 0.383 | 0.019 | 0         | 8 NPY        |
| 0         | 0.514844392 | 0.408 | 0.041 | 0         | 8 LINC01558  |
| 1.18E-71  | 0.514658024 | 0.263 | 0.094 | 3.79E-67  | 8 DNAH5      |
| 0         | 0.513894014 | 0.37  | 0.05  | 0         | 8 LINC00862  |
| 7.71E-192 | 0.512335289 | 0.761 | 0.3   | 2.48E-187 | 8 ATP11A     |
| 6.26E-114 | 0.511069076 | 0.691 | 0.353 | 2.01E-109 | 8 TBCA       |
| 0         | 0.511031524 | 0.37  | 0.026 | 0         | 8 AC098483.1 |
| 7.13E-294 | 0.509570885 | 0.725 | 0.206 | 2.29E-289 | 8 CLIC4      |
| 0         | 0.509002788 | 0.529 | 0.064 | 0         | 8 KHK        |
| 9.32E-275 | 0.50892626  | 0.444 | 0.098 | 2.99E-270 | 8 NOCT       |
| 3.43E-113 | 0.5079116   | 0.991 | 0.83  | 1.10E-108 | 8 SNX29      |
| 0         | 0.507100355 | 0.366 | 0.026 | 0         | 8 STRA8      |
| 0         | 0.505561257 | 0.439 | 0.082 | 0         | 8 HPGD       |
| 0         | 0.503167047 | 0.388 | 0.055 | 0         | 8 AL365259.1 |
| 0         | 0.502768968 | 0.381 | 0.063 | 0         | 8 AC009495.1 |
| 4.24E-107 | 0.502006976 | 0.997 | 0.888 | 1.36E-102 | 8 RORA       |
| 1.42E-180 | 0.501711184 | 0.772 | 0.316 | 4.58E-176 | 8 FREM2      |
| 5.86E-150 | 0.501052877 | 0.728 | 0.334 | 1.88E-145 | 8 DCUN1D4    |
| 1.45E-249 | 0.500498787 | 0.304 | 0.05  | 4.66E-245 | 8 LINC02128  |
| 1.24E-184 | 0.498753279 | 0.26  | 0.05  | 3.98E-180 | 8 AL136114.1 |
| 1.81E-226 | 0.498511775 | 0.647 | 0.218 | 5.82E-222 | 8 DDI2       |
| 8.98E-215 | 0.49747744  | 0.477 | 0.128 | 2.88E-210 | 8 DNAJC6     |
| 4.66E-172 | 0.496887419 | 0.987 | 0.748 | 1.50E-167 | 8 PTPRM      |
| 0         | 0.495781528 | 0.444 | 0.075 | 0         | 8 CDH6       |
| 1.20E-110 | 0.495436585 | 0.819 | 0.469 | 3.84E-106 | 8 TACC2      |
| 2.22E-107 | 0.495359216 | 0.864 | 0.511 | 7.14E-103 | 8 FRMD3      |
| 0         | 0.495136519 | 0.366 | 0.035 | 0         | 8 CRYM       |
| 3.48E-162 | 0.494748582 | 0.657 | 0.27  | 1.12E-157 | 8 ECHDC1     |
| 0         | 0.494554399 | 0.422 | 0.054 | 0         | 8 LINC01020  |
| 1.76E-189 | 0.494040048 | 0.743 | 0.282 | 5.65E-185 | 8 NR3C1      |
| 0         | 0.492805552 | 0.365 | 0.024 | 0         | 8 AC006159.2 |
| 2.27E-169 | 0.492781348 | 0.776 | 0.34  | 7.28E-165 | 8 PLCG1      |
| 0         | 0.492130462 | 0.373 | 0.06  | 0         | 8 DPP4       |
| 1.28E-300 | 0.492072842 | 0.41  | 0.078 | 4.11E-296 | 8 HSD17B3    |
| 1.46E-105 | 0.491602539 | 0.933 | 0.617 | 4.69E-101 | 8 ARHGEF28   |
| 0         | 0.491265719 | 0.41  | 0.054 | 0         | 8 MIR181A1HG |
| 2.11E-165 | 0.490626094 | 0.68  | 0.279 | 6.79E-161 | 8 DTNBP1     |
| 0         | 0.490578894 | 0.483 | 0.087 | 0         | 8 ALDH6A1    |
| 3.54E-170 | 0.490205343 | 0.648 | 0.259 | 1.14E-165 | 8 AC006978.2 |
| 4.80E-221 | 0.485817979 | 0.867 | 0.352 | 1.54E-216 | 8 IQGAP2     |
| 0         | 0.484369845 | 0.345 | 0.047 | 0         | 8 BMX        |
| 0         | 0.484198232 | 0.347 | 0.035 | 0         | 8 CYP4X1     |

|           |             |       |       |           |              |
|-----------|-------------|-------|-------|-----------|--------------|
| 0         | 0.482849727 | 0.553 | 0.109 | 0         | 8 CHDH       |
| 0         | 0.482552349 | 0.576 | 0.141 | 0         | 8 GOLGA2P5   |
| 0         | 0.482271813 | 0.362 | 0.054 | 0         | 8 PLIN2      |
| 1.36E-104 | 0.482187639 | 0.935 | 0.618 | 4.37E-100 | 8 SORBS2     |
| 1.97E-108 | 0.482178332 | 0.983 | 0.767 | 6.32E-104 | 8 TNRC6A     |
| 4.92E-255 | 0.481685035 | 0.473 | 0.113 | 1.58E-250 | 8 ABHD17B    |
| 0         | 0.48054426  | 0.424 | 0.037 | 0         | 8 GPD1       |
| 4.54E-291 | 0.480187514 | 0.634 | 0.172 | 1.46E-286 | 8 HDAC6      |
| 5.04E-95  | 0.480079319 | 0.437 | 0.178 | 1.62E-90  | 8 FOXP2      |
| 7.65E-116 | 0.47992829  | 0.879 | 0.542 | 2.46E-111 | 8 RBM33      |
| 3.23E-207 | 0.478769522 | 0.482 | 0.138 | 1.04E-202 | 8 SNX8       |
| 0         | 0.478568885 | 0.386 | 0.047 | 0         | 8 AC068946.1 |
| 5.98E-175 | 0.478252483 | 0.341 | 0.085 | 1.92E-170 | 8 SOCS2-AS1  |
| 0         | 0.477961921 | 0.532 | 0.104 | 0         | 8 TMEM176B   |
| 3.57E-134 | 0.477604872 | 0.681 | 0.313 | 1.15E-129 | 8 ZNRF2      |
| 8.28E-117 | 0.476825575 | 0.792 | 0.422 | 2.66E-112 | 8 AF127577.4 |
| 8.10E-116 | 0.475838396 | 0.783 | 0.407 | 2.60E-111 | 8 ENTPD1-AS1 |
| 6.36E-282 | 0.475617104 | 0.502 | 0.119 | 2.04E-277 | 8 CERK       |
| 0         | 0.474296055 | 0.431 | 0.074 | 0         | 8 AC007325.2 |
| 3.12E-98  | 0.474139988 | 0.772 | 0.418 | 1.00E-93  | 8 SUCLG2-AS1 |
| 1.52E-112 | 0.473794123 | 0.882 | 0.509 | 4.89E-108 | 8 ARHGAP32   |
| 0         | 0.47335299  | 0.398 | 0.036 | 0         | 8 ANKS4B     |
| 3.30E-240 | 0.4733363   | 0.458 | 0.113 | 1.06E-235 | 8 SSX2IP     |
| 0         | 0.472593617 | 0.436 | 0.046 | 0         | 8 CYP2B6     |
| 5.16E-199 | 0.47163555  | 0.655 | 0.224 | 1.66E-194 | 8 KL         |
| 2.82E-241 | 0.470580188 | 0.466 | 0.116 | 9.06E-237 | 8 ACLY       |
| 2.47E-252 | 0.469800352 | 0.49  | 0.121 | 7.95E-248 | 8 Z94721.1   |
| 2.72E-126 | 0.469173565 | 0.959 | 0.643 | 8.73E-122 | 8 INSR       |
| 0         | 0.468979549 | 0.334 | 0.025 | 0         | 8 C3orf85    |
| 9.02E-62  | 0.468691829 | 0.946 | 0.709 | 2.90E-57  | 8 CGNL1      |
| 4.06E-171 | 0.468168974 | 0.829 | 0.387 | 1.30E-166 | 8 DMXL2      |
| 1.16E-98  | 0.468150542 | 0.959 | 0.669 | 3.73E-94  | 8 PLXDC2     |
| 1.11E-108 | 0.467547382 | 0.495 | 0.208 | 3.58E-104 | 8 DNAH6      |
| 7.88E-159 | 0.466910751 | 0.591 | 0.223 | 2.53E-154 | 8 PANK1      |
| 0         | 0.466902919 | 0.297 | 0.028 | 0         | 8 AC079779.2 |
| 0         | 0.466806059 | 0.378 | 0.028 | 0         | 8 IP6K3      |
| 5.81E-239 | 0.466653986 | 0.528 | 0.143 | 1.87E-234 | 8 AC116562.3 |
| 1.80E-288 | 0.466627828 | 0.463 | 0.101 | 5.79E-284 | 8 SLC16A4    |
| 0         | 0.466208979 | 0.523 | 0.078 | 0         | 8 FGD5       |
| 3.11E-186 | 0.466178824 | 0.613 | 0.222 | 1.00E-181 | 8 CRLS1      |
| 0         | 0.464757713 | 0.595 | 0.124 | 0         | 8 MAF        |
| 3.42E-110 | 0.464644828 | 0.768 | 0.41  | 1.10E-105 | 8 GNPTAB     |
| 2.05E-147 | 0.464511831 | 0.729 | 0.334 | 6.59E-143 | 8 SCP2       |
| 6.99E-145 | 0.464203625 | 0.738 | 0.341 | 2.25E-140 | 8 HSDL2      |
| 7.88E-102 | 0.464018294 | 0.876 | 0.531 | 2.53E-97  | 8 ROCK2      |
| 1.56E-255 | 0.463890452 | 0.512 | 0.132 | 5.00E-251 | 8 ZNF697     |
| 0         | 0.463607123 | 0.414 | 0.048 | 0         | 8 RAB29      |
| 1.32E-117 | 0.462325064 | 1     | 0.823 | 4.22E-113 | 8 PTH2R      |
| 1.46E-78  | 0.461924698 | 0.802 | 0.498 | 4.68E-74  | 8 TMEM245    |
| 0         | 0.461409417 | 0.455 | 0.076 | 0         | 8 AC024896.1 |
| 2.88E-307 | 0.460107291 | 0.596 | 0.142 | 9.26E-303 | 8 ZEB2       |

|           |             |       |       |           |               |
|-----------|-------------|-------|-------|-----------|---------------|
| 1.39E-108 | 0.459881124 | 0.772 | 0.41  | 4.46E-104 | 8 MGMT        |
| 0         | 0.459029036 | 0.294 | 0.02  | 0         | 8 PRNP        |
| 0         | 0.458984836 | 0.444 | 0.05  | 0         | 8 CES3        |
| 5.21E-235 | 0.458922567 | 0.596 | 0.178 | 1.67E-230 | 8 BBOF1       |
| 4.72E-262 | 0.458510361 | 0.489 | 0.119 | 1.52E-257 | 8 AC130462.2  |
| 1.22E-283 | 0.458230886 | 0.456 | 0.098 | 3.91E-279 | 8 EPHX1       |
| 0         | 0.457755257 | 0.339 | 0.044 | 0         | 8 GSTA1       |
| 3.61E-138 | 0.457309892 | 0.28  | 0.07  | 1.16E-133 | 8 PLCXD3      |
| 2.18E-124 | 0.456743715 | 0.661 | 0.309 | 7.00E-120 | 8 SFXN1       |
| 9.52E-191 | 0.456400047 | 0.438 | 0.121 | 3.06E-186 | 8 SERTAD2     |
| 3.97E-208 | 0.455863172 | 0.402 | 0.098 | 1.27E-203 | 8 LGMN        |
| 1.85E-254 | 0.45550948  | 0.438 | 0.097 | 5.93E-250 | 8 SLC16A1-AS1 |
| 1.29E-195 | 0.455352518 | 0.658 | 0.232 | 4.13E-191 | 8 TRPV4       |
| 1.17E-288 | 0.455176733 | 0.415 | 0.081 | 3.74E-284 | 8 NET1        |
| 1.03E-97  | 0.453912109 | 0.972 | 0.718 | 3.30E-93  | 8 SHANK2      |
| 1.16E-147 | 0.452390895 | 0.692 | 0.292 | 3.71E-143 | 8 CACHD1      |
| 0         | 0.451962196 | 0.307 | 0.024 | 0         | 8 SLC16A1     |
| 1.96E-132 | 0.451767825 | 0.772 | 0.385 | 6.30E-128 | 8 GALK2       |
| 6.73E-211 | 0.450930108 | 0.653 | 0.224 | 2.16E-206 | 8 AC127526.3  |
| 4.83E-116 | 0.450580305 | 0.912 | 0.555 | 1.55E-111 | 8 AC008695.1  |
| 2.03E-201 | 0.44800833  | 0.534 | 0.166 | 6.52E-197 | 8 OPTN        |
| 0         | 0.44705715  | 0.311 | 0.023 | 0         | 8 FOLH1B      |
| 1.14E-222 | 0.44567731  | 0.636 | 0.198 | 3.67E-218 | 8 ST3GAL1     |
| 1.97E-232 | 0.445590719 | 0.455 | 0.115 | 6.32E-228 | 8 SEPSECS     |
| 0         | 0.445476839 | 0.34  | 0.046 | 0         | 8 GREB1       |
| 5.77E-66  | 0.445447895 | 0.821 | 0.528 | 1.85E-61  | 8 PCAT1       |
| 1.85E-248 | 0.445190879 | 0.501 | 0.129 | 5.95E-244 | 8 TMEM192     |
| 0         | 0.444539792 | 0.355 | 0.041 | 0         | 8 GAS2L3      |
| 8.88E-253 | 0.444505445 | 0.418 | 0.092 | 2.85E-248 | 8 ACOT13      |
| 0         | 0.443372066 | 0.331 | 0.017 | 0         | 8 RNF186      |
| 0         | 0.443081581 | 0.393 | 0.039 | 0         | 8 PROZ        |
| 1.51E-188 | 0.442289459 | 0.591 | 0.199 | 4.86E-184 | 8 PLD1        |
| 0         | 0.442188522 | 0.334 | 0.024 | 0         | 8 LINC02303   |
| 1.85E-213 | 0.441708922 | 0.577 | 0.179 | 5.95E-209 | 8 HOGA1       |
| 1.73E-85  | 0.441470098 | 0.891 | 0.584 | 5.56E-81  | 8 SUCLG2      |
| 3.25E-102 | 0.441068348 | 0.691 | 0.35  | 1.04E-97  | 8 SESN1       |
| 4.53E-87  | 0.440913435 | 0.855 | 0.525 | 1.45E-82  | 8 LRRFIP2     |
| 2.04E-278 | 0.439890522 | 0.383 | 0.069 | 6.55E-274 | 8 LINC01428   |
| 0         | 0.439748449 | 0.378 | 0.032 | 0         | 8 SLC5A2      |
| 2.54E-77  | 0.439345101 | 0.98  | 0.762 | 8.15E-73  | 8 FARP1       |
| 9.25E-153 | 0.439308173 | 0.7   | 0.3   | 2.97E-148 | 8 KLF9        |
| 0         | 0.439165675 | 0.314 | 0.009 | 0         | 8 HNF4A-AS1   |
| 9.82E-169 | 0.438345201 | 0.557 | 0.197 | 3.15E-164 | 8 INPP5F      |
| 2.35E-95  | 0.437542127 | 0.866 | 0.536 | 7.54E-91  | 8 ANKIB1      |
| 2.44E-145 | 0.436694375 | 0.561 | 0.203 | 7.82E-141 | 8 SLC22A2     |
| 0         | 0.436612595 | 0.396 | 0.05  | 0         | 8 TMEM150A    |
| 2.14E-277 | 0.435942013 | 0.408 | 0.082 | 6.89E-273 | 8 COX14       |
| 3.89E-90  | 0.435817544 | 0.842 | 0.497 | 1.25E-85  | 8 BCKDHB      |
| 8.09E-85  | 0.434400177 | 0.914 | 0.599 | 2.60E-80  | 8 SIPA1L1     |
| 0         | 0.43423718  | 0.385 | 0.053 | 0         | 8 GUCD1       |
| 4.18E-269 | 0.434205726 | 0.412 | 0.085 | 1.34E-264 | 8 SEC16B      |

|           |             |       |       |           |              |
|-----------|-------------|-------|-------|-----------|--------------|
| 0         | 0.433719255 | 0.343 | 0.028 | 0         | 8 AC009084.1 |
| 3.45E-303 | 0.433282453 | 0.429 | 0.082 | 1.11E-298 | 8 HAAO       |
| 4.38E-271 | 0.432893343 | 0.331 | 0.055 | 1.41E-266 | 8 AC116345.3 |
| 3.27E-94  | 0.432726504 | 0.986 | 0.778 | 1.05E-89  | 8 AGAP1      |
| 0         | 0.432489769 | 0.358 | 0.049 | 0         | 8 FOLH1      |
| 0         | 0.432418079 | 0.373 | 0.031 | 0         | 8 ACSM5P1    |
| 2.32E-202 | 0.432161946 | 0.488 | 0.142 | 7.46E-198 | 8 ASAH1      |
| 1.73E-279 | 0.431508595 | 0.279 | 0.038 | 5.55E-275 | 8 GLYATL2    |
| 1.20E-182 | 0.43137807  | 0.529 | 0.175 | 3.86E-178 | 8 AL160269.1 |
| 2.38E-245 | 0.431288197 | 0.354 | 0.069 | 7.65E-241 | 8 LINC02588  |
| 3.78E-152 | 0.429682099 | 0.572 | 0.216 | 1.21E-147 | 8 GK         |
| 2.96E-239 | 0.429632698 | 0.564 | 0.162 | 9.52E-235 | 8 AC141586.1 |
| 4.50E-146 | 0.429395799 | 0.67  | 0.29  | 1.45E-141 | 8 FAM177A1   |
| 1.55E-146 | 0.429364623 | 0.831 | 0.389 | 4.99E-142 | 8 CACNA1D    |
| 0         | 0.428824815 | 0.29  | 0.019 | 0         | 8 MROH2A     |
| 1.77E-243 | 0.428770638 | 0.609 | 0.179 | 5.69E-239 | 8 CALM1      |
| 1.15E-131 | 0.427546544 | 0.666 | 0.303 | 3.68E-127 | 8 ETFA       |
| 0         | 0.427282782 | 0.383 | 0.033 | 0         | 8 PDZD3      |
| 0         | 0.426775509 | 0.574 | 0.127 | 0         | 8 ASPA       |
| 1.29E-195 | 0.426640033 | 0.502 | 0.151 | 4.15E-191 | 8 SRP54-AS1  |
| 1.81E-45  | 0.426531628 | 0.315 | 0.155 | 5.83E-41  | 8 ALDH1A1    |
| 2.85E-152 | 0.424495421 | 0.666 | 0.283 | 9.14E-148 | 8 RIOK3      |
| 1.12E-156 | 0.424205674 | 0.577 | 0.219 | 3.60E-152 | 8 TXLNGY     |
| 0         | 0.424173729 | 0.592 | 0.128 | 0         | 8 AP000346.1 |
| 1.23E-100 | 0.422867813 | 0.791 | 0.433 | 3.94E-96  | 8 CLYBL      |
| 3.17E-240 | 0.42276035  | 0.259 | 0.039 | 1.02E-235 | 8 MT1F       |
| 6.97E-300 | 0.421835075 | 0.295 | 0.04  | 2.24E-295 | 8 CALCB      |
| 2.89E-165 | 0.421729057 | 0.451 | 0.14  | 9.30E-161 | 8 GCLC       |
| 1.12E-66  | 0.420697059 | 0.986 | 0.773 | 3.59E-62  | 8 FGD4       |
| 2.23E-107 | 0.420559493 | 0.743 | 0.384 | 7.15E-103 | 8 LARP1B     |
| 5.24E-307 | 0.420095894 | 0.393 | 0.07  | 1.68E-302 | 8 LPIN3      |
| 6.66E-101 | 0.420011768 | 0.88  | 0.539 | 2.14E-96  | 8 RUFY3      |
| 4.61E-188 | 0.418738571 | 0.628 | 0.226 | 1.48E-183 | 8 TRIP4      |
| 1.39E-290 | 0.418110085 | 0.34  | 0.054 | 4.46E-286 | 8 VSTM4      |
| 3.47E-117 | 0.417839208 | 0.349 | 0.113 | 1.12E-112 | 8 SLC25A21   |
| 0         | 0.417790263 | 0.543 | 0.092 | 0         | 8 ACSM5      |
| 1.15E-150 | 0.417743788 | 0.723 | 0.327 | 3.70E-146 | 8 ZKSCAN1    |
| 4.37E-236 | 0.417641588 | 0.376 | 0.078 | 1.40E-231 | 8 LINC01277  |
| 4.80E-104 | 0.416005296 | 0.643 | 0.313 | 1.54E-99  | 8 ACER3      |
| 1.45E-237 | 0.41586713  | 0.376 | 0.079 | 4.67E-233 | 8 RUNDC3B    |
| 0         | 0.41567195  | 0.365 | 0.04  | 0         | 8 SARDH      |
| 2.44E-248 | 0.414268046 | 0.547 | 0.148 | 7.84E-244 | 8 RTKN       |
| 7.27E-293 | 0.413993273 | 0.29  | 0.04  | 2.33E-288 | 8 SLC5A11    |
| 5.89E-200 | 0.412979576 | 0.539 | 0.167 | 1.89E-195 | 8 POLD3      |
| 5.67E-265 | 0.411474985 | 0.293 | 0.044 | 1.82E-260 | 8 TMEM252-DT |
| 3.86E-115 | 0.410868809 | 0.897 | 0.553 | 1.24E-110 | 8 TAF1D      |
| 2.19E-245 | 0.410525439 | 0.372 | 0.077 | 7.02E-241 | 8 NUDT16     |
| 1.95E-122 | 0.410248127 | 0.506 | 0.197 | 6.27E-118 | 8 TSHZ1      |
| 0         | 0.409918293 | 0.362 | 0.049 | 0         | 8 MYOM2      |
| 1.27E-89  | 0.409752472 | 0.632 | 0.319 | 4.07E-85  | 8 CECR2      |
| 0         | 0.40754348  | 0.334 | 0.05  | 0         | 8 MYLK4      |

|           |             |       |       |           |              |
|-----------|-------------|-------|-------|-----------|--------------|
| 6.23E-158 | 0.405761373 | 0.408 | 0.123 | 2.00E-153 | 8 MORC4      |
| 9.21E-127 | 0.405382184 | 0.66  | 0.3   | 2.96E-122 | 8 CEP43      |
| 3.03E-146 | 0.404341521 | 0.7   | 0.309 | 9.72E-142 | 8 IP6K2      |
| 8.76E-128 | 0.403980581 | 0.782 | 0.373 | 2.81E-123 | 8 SLC3A1     |
| 1.20E-129 | 0.403516409 | 0.66  | 0.299 | 3.86E-125 | 8 LRIG2      |
| 1.84E-235 | 0.403482246 | 0.381 | 0.082 | 5.92E-231 | 8 NCS1       |
| 5.98E-101 | 0.402406894 | 0.823 | 0.454 | 1.92E-96  | 8 IGF2BP2    |
| 0         | 0.402273531 | 0.294 | 0.023 | 0         | 8 NUGGC      |
| 9.79E-242 | 0.402098663 | 0.357 | 0.071 | 3.14E-237 | 8 METTL24    |
| 2.85E-152 | 0.402001295 | 0.494 | 0.176 | 9.16E-148 | 8 DHX35      |
| 0         | 0.401837203 | 0.335 | 0.048 | 0         | 8 UNC5CL     |
| 8.79E-181 | 0.401432536 | 0.494 | 0.152 | 2.82E-176 | 8 EIF1B-AS1  |
| 0         | 0.401029236 | 0.277 | 0.019 | 0         | 8 ACE        |
| 9.95E-95  | 0.400935317 | 0.908 | 0.599 | 3.20E-90  | 8 OGA        |
| 4.18E-148 | 0.399504559 | 0.515 | 0.188 | 1.34E-143 | 8 TEX2       |
| 1.35E-151 | 0.399005386 | 0.483 | 0.163 | 4.33E-147 | 8 POU5F1     |
| 0         | 0.39867542  | 0.302 | 0.033 | 0         | 8 TMEM200A   |
| 1.49E-196 | 0.398533193 | 0.386 | 0.095 | 4.78E-192 | 8 PKP2       |
| 1.26E-224 | 0.398234225 | 0.432 | 0.106 | 4.03E-220 | 8 BAG3       |
| 1.41E-271 | 0.398144525 | 0.472 | 0.107 | 4.54E-267 | 8 SLC2A4RG   |
| 0         | 0.397556668 | 0.413 | 0.066 | 0         | 8 NID1       |
| 6.43E-141 | 0.397530254 | 0.851 | 0.425 | 2.07E-136 | 8 FAT1       |
| 0         | 0.397479852 | 0.277 | 0.021 | 0         | 8 PRDM7      |
| 0         | 0.397232178 | 0.347 | 0.037 | 0         | 8 SORD2P     |
| 0         | 0.397048991 | 0.346 | 0.043 | 0         | 8 ACE2       |
| 0         | 0.396938965 | 0.56  | 0.113 | 0         | 8 AC010451.1 |
| 1.51E-95  | 0.396880391 | 0.643 | 0.318 | 4.83E-91  | 8 GLUD1      |
| 0         | 0.396734666 | 0.348 | 0.036 | 0         | 8 IQSEC3     |
| 3.61E-156 | 0.396666367 | 0.702 | 0.287 | 1.16E-151 | 8 LINC02334  |
| 8.47E-259 | 0.395713642 | 0.387 | 0.077 | 2.72E-254 | 8 IRAG2      |
| 0         | 0.395509922 | 0.347 | 0.033 | 0         | 8 STRA6      |
| 0         | 0.394542448 | 0.368 | 0.06  | 0         | 8 AL080317.1 |
| 0         | 0.394318113 | 0.39  | 0.065 | 0         | 8 AL080317.2 |
| 1.82E-136 | 0.393682668 | 0.639 | 0.273 | 5.85E-132 | 8 ADHFE1     |
| 3.46E-296 | 0.393453915 | 0.619 | 0.157 | 1.11E-291 | 8 FAAH       |
| 3.84E-290 | 0.392973257 | 0.483 | 0.103 | 1.23E-285 | 8 HSD17B14   |
| 4.69E-117 | 0.392633447 | 0.625 | 0.287 | 1.51E-112 | 8 CRYZ       |
| 1.11E-89  | 0.392321174 | 0.731 | 0.39  | 3.57E-85  | 8 LINC01376  |
| 4.93E-78  | 0.39209552  | 0.906 | 0.571 | 1.58E-73  | 8 TRHDE      |
| 2.01E-97  | 0.391958314 | 0.757 | 0.413 | 6.45E-93  | 8 ANKUB1     |
| 6.93E-158 | 0.391797679 | 0.59  | 0.218 | 2.23E-153 | 8 MACROD1    |
| 1.01E-303 | 0.391086613 | 0.436 | 0.083 | 3.24E-299 | 8 BAIAP2L2   |
| 8.13E-228 | 0.391059661 | 0.48  | 0.126 | 2.61E-223 | 8 ZGPAT      |
| 3.06E-195 | 0.390921701 | 0.447 | 0.124 | 9.84E-191 | 8 ACADL      |
| 1.91E-101 | 0.389885028 | 0.741 | 0.399 | 6.13E-97  | 8 CTNNB1     |
| 1.81E-271 | 0.389715694 | 0.443 | 0.093 | 5.82E-267 | 8 SPNS2      |
| 4.93E-191 | 0.389115789 | 0.341 | 0.08  | 1.58E-186 | 8 TXN        |
| 5.96E-169 | 0.388326538 | 0.555 | 0.197 | 1.91E-164 | 8 MTCH2      |
| 1.09E-117 | 0.388135249 | 0.581 | 0.25  | 3.51E-113 | 8 CCDC18     |
| 0         | 0.388071816 | 0.314 | 0.034 | 0         | 8 NT5E       |
| 1.02E-128 | 0.387659939 | 0.542 | 0.219 | 3.27E-124 | 8 DNAJC15    |



|           |             |       |       |           |               |
|-----------|-------------|-------|-------|-----------|---------------|
| 9.32E-109 | 0.387535388 | 0.537 | 0.23  | 2.99E-104 | 8 TGFBR1      |
| 3.52E-93  | 0.387505004 | 0.995 | 0.831 | 1.13E-88  | 8 PARD3       |
| 3.97E-77  | 0.38730568  | 0.98  | 0.663 | 1.27E-72  | 8 AC005208.1  |
| 0         | 0.387300674 | 0.348 | 0.051 | 0         | 8 NRL         |
| 7.06E-155 | 0.387056969 | 0.653 | 0.265 | 2.27E-150 | 8 TRMT11      |
| 3.80E-124 | 0.386918802 | 0.654 | 0.291 | 1.22E-119 | 8 RRAS2       |
| 2.27E-80  | 0.386533791 | 0.541 | 0.263 | 7.28E-76  | 8 LINC01572   |
| 1.48E-294 | 0.385954789 | 0.403 | 0.074 | 4.77E-290 | 8 GGACT       |
| 1.80E-69  | 0.385701515 | 0.851 | 0.548 | 5.77E-65  | 8 MAP7        |
| 0         | 0.385253179 | 0.377 | 0.054 | 0         | 8 SESN2       |
| 1.03E-189 | 0.385168017 | 0.473 | 0.135 | 3.29E-185 | 8 PARM1       |
| 1.32E-83  | 0.384950548 | 0.802 | 0.48  | 4.23E-79  | 8 HIPK3       |
| 2.71E-144 | 0.384585244 | 0.768 | 0.361 | 8.72E-140 | 8 NPLOC4      |
| 2.27E-98  | 0.384402198 | 0.974 | 0.763 | 7.29E-94  | 8 GOLGA4      |
| 7.98E-268 | 0.384219377 | 0.38  | 0.073 | 2.56E-263 | 8 HSD3BP5     |
| 5.49E-127 | 0.384172021 | 0.656 | 0.292 | 1.76E-122 | 8 NDFIP2      |
| 0         | 0.383792929 | 0.387 | 0.063 | 0         | 8 AL021920.2  |
| 0         | 0.383786749 | 0.291 | 0.011 | 0         | 8 LINC00853   |
| 1.49E-197 | 0.383688842 | 0.452 | 0.121 | 4.77E-193 | 8 GRIA3       |
| 8.95E-239 | 0.382998765 | 0.509 | 0.132 | 2.87E-234 | 8 ENPP7P7     |
| 1.71E-87  | 0.382847589 | 0.762 | 0.418 | 5.50E-83  | 8 AL078459.1  |
| 2.36E-228 | 0.382536479 | 0.298 | 0.053 | 7.59E-224 | 8 AL359915.1  |
| 2.75E-133 | 0.382288994 | 0.73  | 0.345 | 8.82E-129 | 8 SAFB2       |
| 2.66E-43  | 0.381967478 | 0.828 | 0.562 | 8.53E-39  | 8 FOXO3       |
| 0         | 0.381966372 | 0.343 | 0.035 | 0         | 8 COL6A4P2    |
| 6.29E-160 | 0.380883556 | 0.465 | 0.152 | 2.02E-155 | 8 MIR22HG     |
| 0         | 0.380378848 | 0.383 | 0.054 | 0         | 8 RASA4       |
| 4.18E-97  | 0.380376125 | 0.783 | 0.42  | 1.34E-92  | 8 ZNF827      |
| 2.93E-101 | 0.380083253 | 0.645 | 0.315 | 9.40E-97  | 8 SFMBT1      |
| 6.43E-117 | 0.379877964 | 0.754 | 0.384 | 2.07E-112 | 8 GAPVD1      |
| 9.44E-19  | 0.379824859 | 0.303 | 0.199 | 3.03E-14  | 8 AQP4-AS1    |
| 3.54E-87  | 0.379801066 | 0.867 | 0.526 | 1.14E-82  | 8 DIP2B       |
| 2.23E-193 | 0.379723786 | 0.653 | 0.225 | 7.16E-189 | 8 ADAMTS9-AS1 |
| 4.54E-178 | 0.379723357 | 0.543 | 0.182 | 1.46E-173 | 8 GOSR2       |
| 1.84E-230 | 0.379305868 | 0.427 | 0.102 | 5.89E-226 | 8 RPS27L      |
| 3.34E-148 | 0.378815829 | 0.852 | 0.395 | 1.07E-143 | 8 ANK2        |
| 1.44E-92  | 0.378605432 | 0.868 | 0.515 | 4.61E-88  | 8 NINL        |
| 1.44E-196 | 0.378592217 | 0.375 | 0.091 | 4.64E-192 | 8 NR1H2       |
| 0         | 0.377656508 | 0.664 | 0.148 | 0         | 8 CLEC18A     |
| 8.02E-168 | 0.377530651 | 0.472 | 0.148 | 2.57E-163 | 8 CEP57L1     |
| 7.79E-195 | 0.377338878 | 0.471 | 0.136 | 2.50E-190 | 8 PEBP1       |
| 6.76E-185 | 0.37628164  | 0.426 | 0.119 | 2.17E-180 | 8 TDP2        |
| 3.96E-141 | 0.375793801 | 0.576 | 0.228 | 1.27E-136 | 8 TRIM66      |
| 0         | 0.375311114 | 0.317 | 0.028 | 0         | 8 AC016924.1  |
| 2.93E-205 | 0.375253429 | 0.587 | 0.184 | 9.42E-201 | 8 USP2        |
| 5.37E-95  | 0.374630633 | 0.879 | 0.525 | 1.72E-90  | 8 TULP4       |
| 9.33E-263 | 0.374522611 | 0.48  | 0.11  | 3.00E-258 | 8 MEIS1       |
| 2.40E-102 | 0.373910058 | 0.794 | 0.43  | 7.71E-98  | 8 RIN2        |
| 3.75E-128 | 0.371676332 | 0.667 | 0.291 | 1.21E-123 | 8 CPPED1      |
| 2.93E-232 | 0.371559252 | 0.344 | 0.069 | 9.42E-228 | 8 AL606489.1  |
| 1.55E-103 | 0.370839595 | 0.792 | 0.428 | 4.98E-99  | 8 SLC25A16    |

|           |             |       |       |           |             |
|-----------|-------------|-------|-------|-----------|-------------|
| 8.53E-91  | 0.370044513 | 0.992 | 0.875 | 2.74E-86  | 8 SYNE2     |
| 1.32E-175 | 0.369945774 | 0.365 | 0.092 | 4.25E-171 | 8 ZNF521    |
| 1.13E-109 | 0.369890176 | 0.86  | 0.47  | 3.62E-105 | 8 MICAL3    |
| 0         | 0.369572861 | 0.357 | 0.053 | 0         | 8 DRICH1    |
| 2.40E-143 | 0.369317685 | 0.574 | 0.224 | 7.70E-139 | 8 ACAT1     |
| 6.72E-60  | 0.368987751 | 0.304 | 0.131 | 2.16E-55  | 8 CFAP299   |
| 1.11E-285 | 0.368969705 | 0.358 | 0.062 | 3.56E-281 | 8 BDH2      |
| 0         | 0.368858855 | 0.388 | 0.066 | 0         | 8 ASB13     |
| 4.47E-181 | 0.36877466  | 0.551 | 0.178 | 1.44E-176 | 8 SLC15A2   |
| 1.39E-234 | 0.368105186 | 0.408 | 0.092 | 4.48E-230 | 8 GRHPR     |
| 0         | 0.367652647 | 0.969 | 0.265 | 0         | 8 FTCD      |
| 4.85E-63  | 0.367313711 | 0.825 | 0.54  | 1.56E-58  | 8 SIPA1L3   |
| 2.48E-161 | 0.367290305 | 0.333 | 0.085 | 7.96E-157 | 8 MT1E      |
| 3.17E-108 | 0.367192686 | 0.692 | 0.34  | 1.02E-103 | 8 BCL2L13   |
| 0         | 0.366699081 | 0.38  | 0.059 | 0         | 8 MAST3     |
| 3.34E-164 | 0.365449357 | 0.478 | 0.153 | 1.07E-159 | 8 LINC01359 |
| 0         | 0.365414359 | 0.297 | 0.031 | 0         | 8 MTPP      |
| 1.22E-244 | 0.365335592 | 0.37  | 0.074 | 3.91E-240 | 8 ETV5      |
| 1.34E-81  | 0.365294456 | 0.791 | 0.459 | 4.30E-77  | 8 ATE1      |
| 0         | 0.365246372 | 0.331 | 0.042 | 0         | 8 TRIM14    |
| 1.12E-177 | 0.364378812 | 0.424 | 0.12  | 3.58E-173 | 8 SLC17A5   |
| 1.18E-81  | 0.364257564 | 0.749 | 0.412 | 3.79E-77  | 8 CC2D2A    |
| 5.70E-163 | 0.363738123 | 0.618 | 0.229 | 1.83E-158 | 8 TPTE2P6   |
| 7.37E-216 | 0.363390794 | 0.41  | 0.099 | 2.37E-211 | 8 TMTC4     |
| 2.15E-63  | 0.363360213 | 0.983 | 0.77  | 6.91E-59  | 8 AOPEP     |
| 4.11E-106 | 0.363217845 | 0.704 | 0.359 | 1.32E-101 | 8 HIRA      |
| 0         | 0.362813741 | 0.323 | 0.027 | 0         | 8 TUBA5P    |
| 5.40E-126 | 0.36125158  | 0.283 | 0.077 | 1.73E-121 | 8 CPEB2-DT  |
| 3.09E-76  | 0.360948918 | 0.857 | 0.538 | 9.94E-72  | 8 ADD3      |
| 3.68E-150 | 0.360935439 | 0.524 | 0.193 | 1.18E-145 | 8 TMBIM6    |
| 2.18E-110 | 0.360888811 | 0.417 | 0.156 | 7.00E-106 | 8 ACADSB    |
| 6.09E-127 | 0.360622178 | 0.653 | 0.288 | 1.96E-122 | 8 CFAP69    |
| 1.04E-175 | 0.360515274 | 0.281 | 0.059 | 3.35E-171 | 8 PPP1R14C  |
| 3.04E-81  | 0.359995232 | 0.873 | 0.545 | 9.77E-77  | 8 KIF13B    |
| 1.29E-97  | 0.359683798 | 0.677 | 0.333 | 4.13E-93  | 8 CRPPA     |
| 4.09E-229 | 0.35943196  | 0.474 | 0.12  | 1.31E-224 | 8 SMTNL2    |
| 0         | 0.359406406 | 0.31  | 0.027 | 0         | 8 SUSD3     |
| 0         | 0.359354738 | 0.274 | 0.017 | 0         | 8 SLCO2B1   |
| 1.69E-196 | 0.359111755 | 0.5   | 0.146 | 5.43E-192 | 8 TPCN2     |
| 0         | 0.358974665 | 0.268 | 0.023 | 0         | 8 MAP7D2    |
| 9.76E-200 | 0.358634587 | 0.652 | 0.224 | 3.14E-195 | 8 RNF212B   |
| 0         | 0.358592035 | 0.355 | 0.039 | 0         | 8 AZGP1     |
| 1.93E-79  | 0.35788559  | 0.912 | 0.602 | 6.19E-75  | 8 SPAG9     |
| 2.36E-201 | 0.357844264 | 0.527 | 0.155 | 7.59E-197 | 8 RIPOR3    |
| 0         | 0.357666829 | 0.278 | 0.028 | 0         | 8 NAT1      |
| 2.96E-147 | 0.357414696 | 0.438 | 0.141 | 9.52E-143 | 8 AMZ1      |
| 1.38E-88  | 0.357355214 | 0.992 | 0.822 | 4.43E-84  | 8 PTPRG     |
| 3.20E-246 | 0.356302662 | 0.413 | 0.091 | 1.03E-241 | 8 BPHL      |
| 3.35E-58  | 0.356276503 | 0.976 | 0.796 | 1.08E-53  | 8 EXOC4     |
| 1.40E-183 | 0.355515458 | 0.596 | 0.205 | 4.50E-179 | 8 CNDP2     |
| 5.48E-237 | 0.354957885 | 0.277 | 0.044 | 1.76E-232 | 8 CCDC158   |

|           |             |       |       |           |              |
|-----------|-------------|-------|-------|-----------|--------------|
| 4.00E-224 | 0.354596534 | 0.479 | 0.125 | 1.29E-219 | 8 OCIAD2     |
| 2.74E-241 | 0.353948436 | 0.475 | 0.116 | 8.81E-237 | 8 SLC9B2     |
| 5.65E-104 | 0.353641272 | 0.723 | 0.371 | 1.82E-99  | 8 ZXDC       |
| 7.09E-109 | 0.353437622 | 0.585 | 0.266 | 2.28E-104 | 8 NAPEPLD    |
| 7.72E-93  | 0.353302776 | 0.649 | 0.328 | 2.48E-88  | 8 AL592183.1 |
| 0         | 0.353250566 | 0.292 | 0.028 | 0         | 8 EEF1AKMT3  |
| 0         | 0.352278696 | 0.297 | 0.029 | 0         | 8 UGT2B26P   |
| 4.40E-141 | 0.352103384 | 0.633 | 0.259 | 1.41E-136 | 8 EVC        |
| 2.26E-103 | 0.35183073  | 0.686 | 0.333 | 7.25E-99  | 8 RETREG1    |
| 3.80E-200 | 0.351790911 | 0.38  | 0.092 | 1.22E-195 | 8 LTBR       |
| 9.06E-165 | 0.351560876 | 0.531 | 0.18  | 2.91E-160 | 8 RMND1      |
| 3.76E-64  | 0.351131948 | 0.948 | 0.658 | 1.21E-59  | 8 PDE8A      |
| 2.19E-116 | 0.35100588  | 0.653 | 0.286 | 7.04E-112 | 8 ZNF462     |
| 1.68E-96  | 0.350950543 | 0.386 | 0.145 | 5.39E-92  | 8 STEAP2-AS1 |
| 5.59E-184 | 0.35078335  | 0.487 | 0.149 | 1.79E-179 | 8 CLCN6      |
| 9.47E-191 | 0.350622319 | 0.438 | 0.122 | 3.04E-186 | 8 C19orf12   |
| 1.12E-134 | 0.349576717 | 0.624 | 0.259 | 3.60E-130 | 8 AP3S2      |
| 1.03E-258 | 0.348860457 | 0.374 | 0.073 | 3.31E-254 | 8 THNSL2     |
| 3.15E-194 | 0.348675409 | 0.466 | 0.133 | 1.01E-189 | 8 SLC3A2     |
| 1.11E-186 | 0.348077096 | 0.535 | 0.171 | 3.56E-182 | 8 SLC2A11    |
| 6.20E-243 | 0.348004789 | 0.382 | 0.078 | 1.99E-238 | 8 COTL1      |
| 4.16E-125 | 0.347504322 | 0.54  | 0.22  | 1.34E-120 | 8 TOMM70     |
| 6.14E-152 | 0.347195711 | 0.496 | 0.17  | 1.97E-147 | 8 ENPP7P10   |
| 1.42E-79  | 0.34611347  | 0.822 | 0.496 | 4.55E-75  | 8 CFDP1      |
| 2.27E-128 | 0.346040755 | 0.579 | 0.239 | 7.30E-124 | 8 WDR12      |
| 3.18E-120 | 0.346013673 | 0.532 | 0.216 | 1.02E-115 | 8 SLC35D1    |
| 9.84E-106 | 0.345440336 | 0.63  | 0.301 | 3.16E-101 | 8 EPS15L1    |
| 1.93E-114 | 0.345062601 | 0.613 | 0.277 | 6.20E-110 | 8 NUP58      |
| 2.79E-191 | 0.34464419  | 0.528 | 0.164 | 8.95E-187 | 8 TOB2       |
| 1.56E-177 | 0.343866067 | 0.258 | 0.049 | 5.00E-173 | 8 AC009271.1 |
| 0         | 0.343814938 | 0.263 | 0.012 | 0         | 8 AL117382.1 |
| 0         | 0.343679805 | 0.322 | 0.038 | 0         | 8 HNF1A      |
| 5.43E-264 | 0.343639094 | 0.438 | 0.094 | 1.75E-259 | 8 SELENBP1   |
| 1.25E-98  | 0.343483732 | 0.708 | 0.363 | 4.01E-94  | 8 SCYL2      |
| 8.05E-134 | 0.343168715 | 0.579 | 0.227 | 2.59E-129 | 8 NPR3       |
| 2.68E-210 | 0.341489848 | 0.379 | 0.088 | 8.62E-206 | 8 B4GALT4    |
| 1.95E-226 | 0.341365304 | 0.426 | 0.101 | 6.25E-222 | 8 MTHFR      |
| 1.23E-246 | 0.340992932 | 0.423 | 0.093 | 3.94E-242 | 8 NEK6       |
| 1.48E-224 | 0.340814772 | 0.333 | 0.065 | 4.75E-220 | 8 FAM124A    |
| 2.49E-102 | 0.340182392 | 0.766 | 0.399 | 8.00E-98  | 8 GNG12      |
| 5.42E-140 | 0.339976574 | 0.433 | 0.141 | 1.74E-135 | 8 GPC4       |
| 1.62E-297 | 0.339792071 | 0.35  | 0.056 | 5.20E-293 | 8 IL17RB     |
| 1.19E-148 | 0.339572303 | 0.455 | 0.15  | 3.82E-144 | 8 LHPP       |
| 1.59E-100 | 0.339262827 | 0.757 | 0.402 | 5.12E-96  | 8 PPP2R2D    |
| 9.87E-251 | 0.338067278 | 0.403 | 0.084 | 3.17E-246 | 8 ECHS1      |
| 2.69E-307 | 0.337441952 | 0.33  | 0.049 | 8.63E-303 | 8 FAHD1      |
| 8.74E-70  | 0.337297147 | 0.337 | 0.141 | 2.81E-65  | 8 TPRG1      |
| 0         | 0.337279898 | 0.262 | 0.015 | 0         | 8 AC021491.4 |
| 0         | 0.336849447 | 0.288 | 0.025 | 0         | 8 ELFN2      |
| 5.04E-89  | 0.336467537 | 0.771 | 0.425 | 1.62E-84  | 8 UBR4       |
| 9.02E-107 | 0.335773875 | 0.558 | 0.248 | 2.90E-102 | 8 FMR1       |

|           |             |       |       |           |              |
|-----------|-------------|-------|-------|-----------|--------------|
| 8.96E-128 | 0.335603161 | 0.671 | 0.303 | 2.88E-123 | 8 ATG4B      |
| 3.73E-165 | 0.335444476 | 0.422 | 0.126 | 1.20E-160 | 8 AC066613.2 |
| 1.58E-81  | 0.335209858 | 0.698 | 0.382 | 5.06E-77  | 8 PTAR1      |
| 0         | 0.334693727 | 0.285 | 0.022 | 0         | 8 CLRN3      |
| 5.63E-110 | 0.334416129 | 0.602 | 0.268 | 1.81E-105 | 8 GTF2E2     |
| 2.74E-150 | 0.334075526 | 0.429 | 0.137 | 8.80E-146 | 8 PDSS1      |
| 3.07E-117 | 0.333674404 | 0.351 | 0.114 | 9.87E-113 | 8 DGKB       |
| 4.40E-75  | 0.333485595 | 0.802 | 0.471 | 1.41E-70  | 8 SHLD2      |
| 1.10E-117 | 0.332951721 | 0.674 | 0.304 | 3.53E-113 | 8 RASGRF2    |
| 2.88E-106 | 0.332815324 | 0.53  | 0.226 | 9.26E-102 | 8 AGLB3      |
| 6.61E-102 | 0.332737922 | 0.565 | 0.253 | 2.12E-97  | 8 UGP2       |
| 6.72E-142 | 0.331802317 | 0.476 | 0.163 | 2.16E-137 | 8 PLSCR4     |
| 1.44E-198 | 0.331797169 | 0.384 | 0.092 | 4.61E-194 | 8 RNF157     |
| 3.96E-200 | 0.33133588  | 0.39  | 0.094 | 1.27E-195 | 8 WASF1      |
| 0         | 0.331332112 | 0.267 | 0.017 | 0         | 8 LINC01016  |
| 9.55E-231 | 0.331132656 | 0.369 | 0.078 | 3.07E-226 | 8 TRIM13     |
| 1.59E-60  | 0.330242867 | 0.905 | 0.624 | 5.10E-56  | 8 ATXN2      |
| 5.95E-151 | 0.329994799 | 0.369 | 0.107 | 1.91E-146 | 8 SLC31A1    |
| 5.10E-63  | 0.329650099 | 0.821 | 0.524 | 1.64E-58  | 8 INVS       |
| 5.51E-63  | 0.328848737 | 0.773 | 0.473 | 1.77E-58  | 8 ABL1       |
| 1.50E-117 | 0.328415037 | 0.51  | 0.202 | 4.83E-113 | 8 LRRC6      |
| 1.41E-169 | 0.328365979 | 0.344 | 0.086 | 4.54E-165 | 8 RNF128     |
| 4.06E-153 | 0.327233861 | 0.508 | 0.173 | 1.30E-148 | 8 CEP135     |
| 4.37E-132 | 0.327066053 | 0.268 | 0.067 | 1.40E-127 | 8 FAM135B    |
| 1.58E-214 | 0.326578131 | 0.329 | 0.067 | 5.08E-210 | 8 C16orf87   |
| 3.16E-183 | 0.326067858 | 0.403 | 0.107 | 1.01E-178 | 8 GNPDA1     |
| 4.31E-215 | 0.326060692 | 0.415 | 0.098 | 1.38E-210 | 8 CCDC88C    |
| 1.27E-142 | 0.325923728 | 0.49  | 0.173 | 4.07E-138 | 8 RNF146     |
| 4.65E-78  | 0.325920319 | 0.788 | 0.471 | 1.49E-73  | 8 USP40      |
| 2.67E-169 | 0.325696618 | 0.423 | 0.123 | 8.57E-165 | 8 TOB1       |
| 0         | 0.324899146 | 0.281 | 0.023 | 0         | 8 AC137056.1 |
| 8.52E-190 | 0.324650487 | 0.402 | 0.103 | 2.74E-185 | 8 AC127526.1 |
| 3.29E-127 | 0.323997952 | 0.73  | 0.329 | 1.06E-122 | 8 ABHD15-AS1 |
| 0         | 0.323805875 | 0.39  | 0.065 | 0         | 8 ALAD       |
| 0         | 0.323699086 | 0.277 | 0.031 | 0         | 8 AL591178.1 |
| 1.86E-79  | 0.323419366 | 0.709 | 0.366 | 5.97E-75  | 8 PLPPR1     |
| 2.98E-131 | 0.323218661 | 0.481 | 0.178 | 9.56E-127 | 8 SAR1B      |
| 0         | 0.323059548 | 0.796 | 0.172 | 0         | 8 AFM        |
| 3.96E-123 | 0.322559089 | 0.486 | 0.186 | 1.27E-118 | 8 TAF4       |
| 7.12E-182 | 0.322513895 | 0.432 | 0.123 | 2.29E-177 | 8 LAMP1      |
| 0         | 0.322025875 | 0.264 | 0.016 | 0         | 8 PLA2G12B   |
| 8.17E-178 | 0.321861774 | 0.502 | 0.157 | 2.63E-173 | 8 EIF4EBP2   |
| 9.03E-115 | 0.321813354 | 0.491 | 0.195 | 2.90E-110 | 8 BBS2       |
| 2.44E-90  | 0.321698484 | 0.845 | 0.484 | 7.83E-86  | 8 FBXO34     |
| 7.51E-250 | 0.321607402 | 0.369 | 0.072 | 2.41E-245 | 8 AQP7       |
| 4.05E-112 | 0.321345924 | 0.584 | 0.25  | 1.30E-107 | 8 LINC02615  |
| 3.68E-98  | 0.320845202 | 0.628 | 0.305 | 1.18E-93  | 8 XIAP       |
| 4.70E-125 | 0.320562133 | 0.476 | 0.173 | 1.51E-120 | 8 MB21D2     |
| 1.21E-207 | 0.320384558 | 0.35  | 0.077 | 3.89E-203 | 8 A4GALT     |
| 1.33E-210 | 0.320343202 | 0.408 | 0.098 | 4.27E-206 | 8 ALDH2      |
| 5.98E-251 | 0.318191954 | 0.319 | 0.055 | 1.92E-246 | 8 QDPR       |

|           |             |       |       |           |              |
|-----------|-------------|-------|-------|-----------|--------------|
| 7.64E-226 | 0.318106577 | 0.407 | 0.093 | 2.45E-221 | 8 GRINA      |
| 5.07E-128 | 0.318002682 | 0.432 | 0.15  | 1.63E-123 | 8 ANKDD1B    |
| 1.56E-259 | 0.317942081 | 0.372 | 0.07  | 4.99E-255 | 8 LRRC75B    |
| 8.57E-308 | 0.317912402 | 0.346 | 0.052 | 2.75E-303 | 8 TMPRSS4    |
| 4.02E-248 | 0.317692402 | 0.331 | 0.06  | 1.29E-243 | 8 KLF15      |
| 4.71E-149 | 0.317387132 | 0.362 | 0.103 | 1.51E-144 | 8 ACVR2B     |
| 6.38E-232 | 0.317369399 | 0.397 | 0.087 | 2.05E-227 | 8 AP002990.1 |
| 2.88E-217 | 0.317052418 | 0.294 | 0.053 | 9.25E-213 | 8 KCNG2      |
| 0         | 0.316941679 | 0.251 | 0.019 | 0         | 8 CLDN2      |
| 3.42E-72  | 0.316636468 | 0.67  | 0.368 | 1.10E-67  | 8 DDX10      |
| 4.10E-280 | 0.316507416 | 0.388 | 0.072 | 1.32E-275 | 8 SCRIN2     |
| 7.23E-100 | 0.316192153 | 0.608 | 0.28  | 2.32E-95  | 8 CCDC6      |
| 6.19E-144 | 0.314992074 | 0.318 | 0.084 | 1.99E-139 | 8 LINC00535  |
| 0         | 0.314678544 | 0.304 | 0.032 | 0         | 8 SLC34A3    |
| 5.07E-54  | 0.314499193 | 0.946 | 0.712 | 1.63E-49  | 8 KANSL1L    |
| 1.18E-217 | 0.314291038 | 0.427 | 0.103 | 3.78E-213 | 8 RXRA       |
| 1.21E-298 | 0.314213148 | 0.277 | 0.035 | 3.89E-294 | 8 PNPLA1     |
| 5.67E-147 | 0.313863688 | 0.471 | 0.16  | 1.82E-142 | 8 SS18L1     |
| 3.92E-118 | 0.313853665 | 0.65  | 0.297 | 1.26E-113 | 8 PDPK1      |
| 1.21E-85  | 0.313697784 | 0.82  | 0.471 | 3.90E-81  | 8 CCDC30     |
| 0         | 0.313615823 | 0.263 | 0.022 | 0         | 8 ASB15      |
| 2.24E-236 | 0.313460248 | 0.297 | 0.051 | 7.19E-232 | 8 MARCHF9    |
| 2.53E-298 | 0.313390857 | 0.327 | 0.049 | 8.13E-294 | 8 CDHR2      |
| 1.55E-98  | 0.313042357 | 0.727 | 0.367 | 4.97E-94  | 8 PDZD8      |
| 3.79E-112 | 0.312649355 | 0.568 | 0.246 | 1.22E-107 | 8 ATP6V1C1   |
| 1.30E-103 | 0.312336001 | 0.654 | 0.309 | 4.19E-99  | 8 SPEF2      |
| 3.02E-191 | 0.312239247 | 0.319 | 0.07  | 9.71E-187 | 8 BTD        |
| 6.44E-53  | 0.312077019 | 0.884 | 0.607 | 2.07E-48  | 8 STPG2      |
| 1.12E-164 | 0.312009957 | 0.408 | 0.118 | 3.59E-160 | 8 ATP5IF1    |
| 0         | 0.310917824 | 0.324 | 0.044 | 0         | 8 SLC37A4    |
| 2.95E-275 | 0.310719869 | 0.281 | 0.04  | 9.49E-271 | 8 SLC51A     |
| 2.64E-52  | 0.310355715 | 0.917 | 0.664 | 8.47E-48  | 8 DLG1       |
| 2.76E-199 | 0.310327422 | 0.429 | 0.111 | 8.86E-195 | 8 ULK3       |
| 2.20E-134 | 0.309883272 | 0.421 | 0.141 | 7.05E-130 | 8 GLUD1P2    |
| 1.17E-168 | 0.309262723 | 0.473 | 0.146 | 3.76E-164 | 8 MCRIP2     |
| 2.88E-170 | 0.309153479 | 0.387 | 0.103 | 9.26E-166 | 8 AR         |
| 8.41E-81  | 0.308659969 | 0.903 | 0.58  | 2.70E-76  | 8 ENOSF1     |
| 5.12E-96  | 0.308565744 | 0.602 | 0.285 | 1.64E-91  | 8 PLEKHM3    |
| 6.05E-92  | 0.308496351 | 0.514 | 0.231 | 1.94E-87  | 8 SLC38A6    |
| 1.23E-85  | 0.307682614 | 0.696 | 0.365 | 3.96E-81  | 8 MYO5B      |
| 2.36E-109 | 0.307626311 | 0.56  | 0.242 | 7.59E-105 | 8 ERI2       |
| 7.95E-161 | 0.307196582 | 0.366 | 0.098 | 2.55E-156 | 8 LINC01322  |
| 3.86E-84  | 0.306020799 | 0.564 | 0.269 | 1.24E-79  | 8 DTWD2      |
| 7.94E-57  | 0.30599337  | 0.873 | 0.594 | 2.55E-52  | 8 WDPCP      |
| 6.76E-63  | 0.305882073 | 0.932 | 0.636 | 2.17E-58  | 8 EHBP1      |
| 7.39E-77  | 0.305730771 | 0.818 | 0.479 | 2.37E-72  | 8 ZNRF3      |
| 1.40E-150 | 0.305546037 | 0.406 | 0.123 | 4.48E-146 | 8 XPC-AS1    |
| 3.25E-128 | 0.305462997 | 0.385 | 0.123 | 1.04E-123 | 8 DIPK1A     |
| 2.97E-147 | 0.305265651 | 0.443 | 0.14  | 9.53E-143 | 8 SLCO4C1    |
| 1.59E-161 | 0.305132296 | 0.348 | 0.092 | 5.12E-157 | 8 ADI1       |
| 1.03E-142 | 0.30421816  | 0.327 | 0.09  | 3.31E-138 | 8 SELENOP    |

|           |             |       |       |           |                |
|-----------|-------------|-------|-------|-----------|----------------|
| 6.07E-69  | 0.303794473 | 0.837 | 0.53  | 1.95E-64  | 8 SMARCC1      |
| 1.05E-146 | 0.303715921 | 0.352 | 0.098 | 3.37E-142 | 8 AL162411.1   |
| 3.06E-81  | 0.303654115 | 0.832 | 0.49  | 9.83E-77  | 8 TPT1-AS1     |
| 2.10E-46  | 0.303518405 | 0.863 | 0.578 | 6.73E-42  | 8 ZNF407       |
| 2.29E-242 | 0.302495827 | 0.301 | 0.051 | 7.35E-238 | 8 AC034206.1   |
| 2.74E-185 | 0.30244201  | 0.398 | 0.105 | 8.80E-181 | 8 CLUHP3       |
| 8.62E-242 | 0.302224029 | 0.371 | 0.073 | 2.77E-237 | 8 LINC01349    |
| 3.61E-197 | 0.302081358 | 0.3   | 0.06  | 1.16E-192 | 8 SOX9-AS1     |
| 2.29E-129 | 0.301977126 | 0.521 | 0.196 | 7.35E-125 | 8 PPFIBP2      |
| 1.95E-121 | 0.301817416 | 0.505 | 0.192 | 6.25E-117 | 8 MEI4         |
| 1.66E-299 | 0.301338441 | 0.396 | 0.068 | 5.33E-295 | 8 IGFBP4       |
| 6.77E-212 | 0.300780223 | 0.335 | 0.068 | 2.17E-207 | 8 ILDR2        |
| 1.35E-117 | 0.300543389 | 0.544 | 0.225 | 4.34E-113 | 8 AK2          |
| 6.12E-144 | 0.300500107 | 0.432 | 0.14  | 1.97E-139 | 8 ZFYVE1       |
| 6.92E-152 | 0.300307409 | 0.352 | 0.097 | 2.22E-147 | 8 GFOD2        |
| 3.28E-140 | 0.300092451 | 0.435 | 0.141 | 1.05E-135 | 8 USP31        |
| 1.96E-157 | 0.29927564  | 0.379 | 0.108 | 6.29E-153 | 8 AC004918.1   |
| 3.01E-113 | 0.299157609 | 0.469 | 0.185 | 9.68E-109 | 8 ST13         |
| 1.21E-268 | 0.299057368 | 0.303 | 0.047 | 3.88E-264 | 8 PDK2         |
| 6.56E-194 | 0.298244484 | 0.344 | 0.079 | 2.11E-189 | 8 TBC1D10A     |
| 3.98E-165 | 0.298051718 | 0.312 | 0.074 | 1.28E-160 | 8 GCDH         |
| 4.19E-88  | 0.297639865 | 0.315 | 0.113 | 1.34E-83  | 8 MT2A         |
| 1.14E-191 | 0.297319121 | 0.376 | 0.091 | 3.67E-187 | 8 AC002996.1   |
| 6.20E-192 | 0.297205155 | 0.325 | 0.071 | 1.99E-187 | 8 SLC5A9       |
| 0         | 0.297084561 | 0.27  | 0.025 | 0         | 8 CYTH4        |
| 6.39E-126 | 0.2969247   | 0.427 | 0.149 | 2.05E-121 | 8 ATP6V1E1     |
| 4.74E-107 | 0.29689528  | 0.641 | 0.299 | 1.52E-102 | 8 URGCP-MRPS24 |
| 0         | 0.296591239 | 0.27  | 0.029 | 0         | 8 ACY3         |
| 3.20E-164 | 0.296355697 | 0.378 | 0.104 | 1.03E-159 | 8 RORC         |
| 1.20E-236 | 0.296024814 | 0.504 | 0.126 | 3.84E-232 | 8 FGFR3        |
| 0         | 0.295573013 | 0.252 | 0.022 | 0         | 8 SLC30A2      |
| 2.21E-143 | 0.295526285 | 0.562 | 0.198 | 7.10E-139 | 8 TENM4        |
| 1.66E-56  | 0.295156373 | 0.88  | 0.6   | 5.32E-52  | 8 STAU2        |
| 1.10E-131 | 0.295125467 | 0.427 | 0.144 | 3.54E-127 | 8 ANKRD18CP    |
| 6.28E-156 | 0.294862644 | 0.444 | 0.137 | 2.02E-151 | 8 NMRK1        |
| 5.39E-139 | 0.294664193 | 0.338 | 0.096 | 1.73E-134 | 8 ACAA2        |
| 4.33E-197 | 0.294578555 | 0.423 | 0.109 | 1.39E-192 | 8 PDPK2P       |
| 1.51E-253 | 0.294434055 | 0.301 | 0.047 | 4.85E-249 | 8 SLC22A12     |
| 6.78E-68  | 0.293965934 | 0.709 | 0.391 | 2.18E-63  | 8 DPH6-DT      |
| 2.61E-89  | 0.293953958 | 0.54  | 0.253 | 8.40E-85  | 8 SGK2         |
| 3.24E-53  | 0.293884222 | 0.805 | 0.513 | 1.04E-48  | 8 FGF7P3       |
| 6.10E-51  | 0.293804002 | 0.894 | 0.627 | 1.96E-46  | 8 MLLT10       |
| 4.03E-209 | 0.293518624 | 0.841 | 0.312 | 1.29E-204 | 8 CCDC200      |
| 0         | 0.293100641 | 0.286 | 0.035 | 0         | 8 ALPL         |
| 1.75E-144 | 0.292872601 | 0.435 | 0.141 | 5.62E-140 | 8 NFE2L1       |
| 3.24E-210 | 0.292622075 | 0.421 | 0.103 | 1.04E-205 | 8 LPAR6        |
| 0         | 0.292617222 | 0.271 | 0.029 | 0         | 8 DNAJC22      |
| 3.17E-204 | 0.292202508 | 0.357 | 0.08  | 1.02E-199 | 8 INAVA        |
| 2.05E-158 | 0.291939472 | 0.39  | 0.111 | 6.58E-154 | 8 XPC          |
| 2.16E-99  | 0.291591379 | 0.458 | 0.184 | 6.95E-95  | 8 LINC01006    |
| 1.17E-105 | 0.291268749 | 0.652 | 0.305 | 3.75E-101 | 8 KDM4B        |

|           |             |       |       |           |               |
|-----------|-------------|-------|-------|-----------|---------------|
| 4.40E-104 | 0.291056372 | 0.551 | 0.239 | 1.41E-99  | 8 BLCAP       |
| 1.50E-299 | 0.291022802 | 0.283 | 0.036 | 4.83E-295 | 8 AC068987.2  |
| 1.63E-54  | 0.290910311 | 0.832 | 0.547 | 5.24E-50  | 8 KIF1B       |
| 5.07E-116 | 0.290757278 | 0.528 | 0.214 | 1.63E-111 | 8 GTF3C1      |
| 3.97E-213 | 0.290606776 | 0.288 | 0.053 | 1.28E-208 | 8 MOCS1       |
| 5.19E-179 | 0.290526412 | 0.336 | 0.08  | 1.67E-174 | 8 CTPS1       |
| 8.78E-82  | 0.290497379 | 0.497 | 0.23  | 2.82E-77  | 8 ITPK1       |
| 9.31E-176 | 0.28985478  | 0.401 | 0.109 | 2.99E-171 | 8 GATD3A      |
| 8.03E-89  | 0.289738187 | 0.744 | 0.387 | 2.58E-84  | 8 CAMK2D      |
| 2.31E-192 | 0.289730716 | 0.369 | 0.087 | 7.43E-188 | 8 LONRF3      |
| 9.19E-76  | 0.28970539  | 0.766 | 0.44  | 2.95E-71  | 8 TYW1B       |
| 3.08E-103 | 0.289230486 | 0.619 | 0.285 | 9.89E-99  | 8 ZNF75D      |
| 1.19E-103 | 0.288789111 | 0.466 | 0.19  | 3.81E-99  | 8 C6orf89     |
| 2.37E-105 | 0.28870406  | 0.44  | 0.172 | 7.63E-101 | 8 RTCA        |
| 8.05E-87  | 0.288286554 | 0.351 | 0.133 | 2.59E-82  | 8 CA3         |
| 2.79E-299 | 0.288211855 | 0.331 | 0.05  | 8.97E-295 | 8 RENBP       |
| 1.40E-271 | 0.2881837   | 0.294 | 0.044 | 4.49E-267 | 8 SLC9A3R1    |
| 3.20E-76  | 0.288002513 | 0.539 | 0.263 | 1.03E-71  | 8 CDKL5       |
| 5.21E-258 | 0.287587777 | 0.294 | 0.046 | 1.67E-253 | 8 CAPN12      |
| 2.93E-47  | 0.28729623  | 0.792 | 0.511 | 9.40E-43  | 8 GRAMD2B     |
| 2.15E-81  | 0.287261947 | 0.752 | 0.422 | 6.89E-77  | 8 FBXL5       |
| 5.58E-55  | 0.286993091 | 0.855 | 0.545 | 1.79E-50  | 8 TSC22D1     |
| 2.93E-171 | 0.286564637 | 0.4   | 0.111 | 9.41E-167 | 8 SCAMP2      |
| 6.97E-120 | 0.286275621 | 0.29  | 0.082 | 2.24E-115 | 8 PIR         |
| 5.55E-79  | 0.285639082 | 0.771 | 0.437 | 1.78E-74  | 8 AL358113.1  |
| 9.43E-58  | 0.285616916 | 0.941 | 0.659 | 3.03E-53  | 8 AAK1        |
| 2.42E-103 | 0.285344958 | 0.369 | 0.132 | 7.78E-99  | 8 CTNNBIP1    |
| 1.06E-93  | 0.285330271 | 0.549 | 0.25  | 3.39E-89  | 8 IMPA2       |
| 1.01E-51  | 0.285012495 | 0.31  | 0.143 | 3.25E-47  | 8 NEGR1       |
| 5.28E-132 | 0.284995504 | 0.356 | 0.107 | 1.70E-127 | 8 SEPSECS-AS1 |
| 3.69E-213 | 0.284907766 | 0.484 | 0.126 | 1.19E-208 | 8 DNMI        |
| 1.57E-99  | 0.284875267 | 0.427 | 0.166 | 5.03E-95  | 8 PTPN20      |
| 3.21E-81  | 0.284823426 | 0.658 | 0.342 | 1.03E-76  | 8 WASL        |
| 7.26E-90  | 0.284749669 | 0.506 | 0.225 | 2.33E-85  | 8 MTM1        |
| 8.02E-112 | 0.28474236  | 0.496 | 0.197 | 2.58E-107 | 8 SNTB2       |
| 2.21E-77  | 0.284664108 | 0.601 | 0.304 | 7.08E-73  | 8 Z98752.3    |
| 4.76E-261 | 0.284564194 | 0.36  | 0.065 | 1.53E-256 | 8 GGTLC2      |
| 5.50E-101 | 0.284408952 | 0.541 | 0.236 | 1.77E-96  | 8 UHRF1BP1L   |
| 2.97E-212 | 0.283692368 | 0.396 | 0.091 | 9.54E-208 | 8 SMTN        |
| 1.54E-64  | 0.283690792 | 0.767 | 0.451 | 4.93E-60  | 8 MAP2K5      |
| 2.68E-129 | 0.283040768 | 0.555 | 0.215 | 8.60E-125 | 8 RHPN2       |
| 6.84E-174 | 0.282187962 | 0.423 | 0.119 | 2.20E-169 | 8 ENPP7P5     |
| 2.93E-72  | 0.282172411 | 0.495 | 0.243 | 9.41E-68  | 8 MGST3       |
| 3.82E-77  | 0.282033636 | 0.757 | 0.425 | 1.23E-72  | 8 UBE2R2      |
| 2.29E-63  | 0.282005107 | 0.894 | 0.578 | 7.36E-59  | 8 LYPLAL1     |
| 6.08E-64  | 0.281682471 | 0.332 | 0.141 | 1.95E-59  | 8 SORCS2      |
| 8.84E-117 | 0.280587881 | 0.612 | 0.258 | 2.84E-112 | 8 SCTR        |
| 0         | 0.279684506 | 0.28  | 0.032 | 0         | 8 CYP4F2      |
| 1.04E-116 | 0.279643624 | 0.483 | 0.187 | 3.34E-112 | 8 CD164       |
| 4.97E-121 | 0.279605333 | 0.348 | 0.11  | 1.59E-116 | 8 APIAR       |
| 1.08E-212 | 0.279457729 | 0.264 | 0.045 | 3.45E-208 | 8 AMACR       |

|           |             |       |       |           |                 |
|-----------|-------------|-------|-------|-----------|-----------------|
| 3.98E-108 | 0.279352048 | 0.514 | 0.209 | 1.28E-103 | 8 PKIG          |
| 1.15E-109 | 0.279135642 | 0.579 | 0.249 | 3.69E-105 | 8 FBXO28        |
| 4.21E-105 | 0.278976017 | 0.423 | 0.159 | 1.35E-100 | 8 SNX7          |
| 2.51E-100 | 0.278857824 | 0.609 | 0.281 | 8.05E-96  | 8 ERGIC1        |
| 0         | 0.278719347 | 0.253 | 0.026 | 0         | 8 TMEM150B      |
| 1.68E-111 | 0.278677086 | 0.747 | 0.345 | 5.40E-107 | 8 PPARG         |
| 0         | 0.278651118 | 0.292 | 0.037 | 0         | 8 DBH-AS1       |
| 8.53E-174 | 0.278570025 | 0.34  | 0.083 | 2.74E-169 | 8 PHYH          |
| 7.95E-152 | 0.278429447 | 0.319 | 0.081 | 2.55E-147 | 8 CYP27A1       |
| 5.89E-112 | 0.278134075 | 0.35  | 0.114 | 1.89E-107 | 8 GUCY2C        |
| 1.12E-81  | 0.278062767 | 0.675 | 0.352 | 3.59E-77  | 8 LDAH          |
| 6.88E-129 | 0.277877301 | 0.388 | 0.127 | 2.21E-124 | 8 TMED4         |
| 1.62E-58  | 0.277786498 | 0.801 | 0.5   | 5.19E-54  | 8 TASP1         |
| 0         | 0.277515937 | 0.335 | 0.044 | 0         | 8 CTD-3080P12.3 |
| 2.12E-89  | 0.277446641 | 0.627 | 0.308 | 6.80E-85  | 8 STK38         |
| 1.14E-66  | 0.276943446 | 0.848 | 0.52  | 3.65E-62  | 8 RNF38         |
| 2.58E-114 | 0.276230743 | 0.324 | 0.099 | 8.27E-110 | 8 RBM20         |
| 6.48E-91  | 0.276036122 | 0.376 | 0.144 | 2.08E-86  | 8 LIN54         |
| 7.62E-55  | 0.275477961 | 0.893 | 0.608 | 2.45E-50  | 8 HERC4         |
| 1.70E-119 | 0.275394961 | 0.354 | 0.114 | 5.47E-115 | 8 MED21         |
| 1.14E-80  | 0.275383137 | 0.651 | 0.337 | 3.65E-76  | 8 STAT5B        |
| 1.08E-81  | 0.275022382 | 0.573 | 0.281 | 3.48E-77  | 8 SNX27         |
| 2.71E-180 | 0.274449207 | 0.365 | 0.091 | 8.69E-176 | 8 OGG1          |
| 4.24E-68  | 0.273987213 | 0.78  | 0.461 | 1.36E-63  | 8 RAB7A         |
| 6.09E-69  | 0.273500816 | 0.763 | 0.436 | 1.95E-64  | 8 PAQR5         |
| 5.18E-59  | 0.272825921 | 0.874 | 0.599 | 1.66E-54  | 8 HNRNPH1       |
| 3.03E-179 | 0.272759957 | 0.351 | 0.086 | 9.73E-175 | 8 AC145124.1    |
| 1.63E-105 | 0.272576941 | 0.54  | 0.229 | 5.23E-101 | 8 NDUFAF6       |
| 1.35E-39  | 0.272386785 | 0.908 | 0.671 | 4.34E-35  | 8 MON2          |
| 0         | 0.272374251 | 0.257 | 0.025 | 0         | 8 MYOM3         |
| 4.41E-80  | 0.272293563 | 0.681 | 0.356 | 1.42E-75  | 8 YAF2          |
| 5.17E-160 | 0.271855716 | 0.579 | 0.195 | 1.66E-155 | 8 CD200         |
| 2.81E-86  | 0.271442193 | 0.609 | 0.3   | 9.03E-82  | 8 ILRUN         |
| 1.09E-250 | 0.271389414 | 0.331 | 0.058 | 3.50E-246 | 8 AKR1C3        |
| 1.11E-72  | 0.270984466 | 0.626 | 0.332 | 3.56E-68  | 8 XPO7          |
| 9.63E-138 | 0.270768033 | 0.349 | 0.102 | 3.09E-133 | 8 C6orf201      |
| 1.10E-132 | 0.27069804  | 0.472 | 0.166 | 3.54E-128 | 8 MTHFD1        |
| 1.02E-61  | 0.269927833 | 0.596 | 0.333 | 3.27E-57  | 8 SEMA4D        |
| 1.16E-72  | 0.269542046 | 0.798 | 0.464 | 3.73E-68  | 8 CERT1         |
| 8.36E-137 | 0.269222964 | 0.444 | 0.147 | 2.68E-132 | 8 LINC00937     |
| 1.06E-100 | 0.269032163 | 0.256 | 0.075 | 3.42E-96  | 8 UGDH          |
| 5.52E-88  | 0.268614993 | 0.579 | 0.277 | 1.77E-83  | 8 PPM1A         |
| 1.32E-135 | 0.268554631 | 0.471 | 0.164 | 4.25E-131 | 8 AC092329.3    |
| 2.64E-78  | 0.268145232 | 0.72  | 0.384 | 8.49E-74  | 8 PPM1H         |
| 5.07E-305 | 0.267475147 | 0.253 | 0.028 | 1.63E-300 | 8 MYO7A         |
| 1.14E-172 | 0.267468703 | 0.259 | 0.051 | 3.68E-168 | 8 HSD3BP4       |
| 2.21E-244 | 0.267392274 | 0.319 | 0.055 | 7.11E-240 | 8 AC139530.2    |
| 1.13E-115 | 0.26616922  | 0.333 | 0.104 | 3.64E-111 | 8 TXK           |
| 1.89E-236 | 0.265727412 | 0.25  | 0.036 | 6.08E-232 | 8 PCA3          |
| 2.27E-159 | 0.26506281  | 0.317 | 0.078 | 7.28E-155 | 8 GCLM          |
| 6.96E-121 | 0.265024983 | 0.417 | 0.144 | 2.24E-116 | 8 PTK2B         |



|           |             |       |       |           |              |
|-----------|-------------|-------|-------|-----------|--------------|
| 2.28E-149 | 0.265012794 | 0.669 | 0.267 | 7.33E-145 | 8 D2HGDH     |
| 1.67E-111 | 0.264857725 | 0.568 | 0.241 | 5.35E-107 | 8 ADGRG1     |
| 2.62E-124 | 0.264710517 | 0.398 | 0.13  | 8.41E-120 | 8 SLC41A2    |
| 1.82E-147 | 0.264537121 | 0.432 | 0.134 | 5.83E-143 | 8 AC127526.2 |
| 1.61E-116 | 0.264422613 | 0.28  | 0.078 | 5.19E-112 | 8 CERKL      |
| 2.53E-122 | 0.264119759 | 0.334 | 0.101 | 8.13E-118 | 8 CAPN13     |
| 3.47E-125 | 0.263815762 | 0.333 | 0.1   | 1.11E-120 | 8 ZFY        |
| 5.55E-33  | 0.263340469 | 0.935 | 0.67  | 1.78E-28  | 8 ABLIM1     |
| 1.26E-120 | 0.262717572 | 0.383 | 0.128 | 4.04E-116 | 8 SLC35D2    |
| 4.66E-123 | 0.262496789 | 0.39  | 0.13  | 1.50E-118 | 8 SFT2D2     |
| 2.26E-104 | 0.262430067 | 0.268 | 0.078 | 7.25E-100 | 8 XKR9       |
| 3.13E-56  | 0.262334289 | 0.616 | 0.35  | 1.01E-51  | 8 JADE1      |
| 3.86E-92  | 0.262213315 | 0.533 | 0.241 | 1.24E-87  | 8 PRPSAP2    |
| 1.18E-98  | 0.261931658 | 0.309 | 0.103 | 3.80E-94  | 8 ZNF330     |
| 1.78E-136 | 0.261877239 | 0.27  | 0.066 | 5.72E-132 | 8 FAM78B     |
| 1.45E-88  | 0.261798112 | 0.602 | 0.288 | 4.67E-84  | 8 TANGO6     |
| 2.11E-83  | 0.261772185 | 0.672 | 0.351 | 6.76E-79  | 8 POM121     |
| 6.08E-52  | 0.261636691 | 0.912 | 0.632 | 1.95E-47  | 8 AC007000.3 |
| 9.56E-91  | 0.261364723 | 0.6   | 0.282 | 3.07E-86  | 8 BIVM       |
| 3.95E-127 | 0.261140484 | 0.365 | 0.115 | 1.27E-122 | 8 STRADB     |
| 1.45E-81  | 0.260987204 | 0.673 | 0.351 | 4.66E-77  | 8 KIAA1671   |
| 1.09E-127 | 0.260918713 | 0.377 | 0.119 | 3.49E-123 | 8 SLF1       |
| 6.09E-179 | 0.260376209 | 0.351 | 0.084 | 1.96E-174 | 8 FAM107A    |
| 2.83E-202 | 0.259926017 | 0.344 | 0.075 | 9.10E-198 | 8 CAMSAP3    |
| 1.67E-280 | 0.259162744 | 0.252 | 0.031 | 5.35E-276 | 8 DAO        |
| 1.63E-109 | 0.259140848 | 0.437 | 0.163 | 5.22E-105 | 8 RASSF6     |
| 4.91E-62  | 0.259099756 | 0.732 | 0.439 | 1.58E-57  | 8 DCAF5      |
| 1.35E-153 | 0.25882436  | 0.31  | 0.075 | 4.33E-149 | 8 STXBP6     |
| 1.19E-169 | 0.25866314  | 0.511 | 0.161 | 3.82E-165 | 8 AF228730.5 |
| 1.03E-83  | 0.258493029 | 0.953 | 0.581 | 3.30E-79  | 8 ADAMTS9    |
| 3.43E-139 | 0.258469298 | 0.368 | 0.11  | 1.10E-134 | 8 ZSWIM8     |
| 1.02E-106 | 0.257750466 | 0.317 | 0.1   | 3.27E-102 | 8 TIAM1      |
| 2.04E-71  | 0.257648684 | 0.64  | 0.339 | 6.55E-67  | 8 ATF7-NPFF  |
| 1.18E-102 | 0.257542935 | 0.726 | 0.353 | 3.78E-98  | 8 SLC43A2    |
| 8.40E-252 | 0.257160624 | 0.263 | 0.038 | 2.70E-247 | 8 AHCY       |
| 3.64E-48  | 0.256829689 | 0.754 | 0.479 | 1.17E-43  | 8 PPP2R2A    |
| 1.11E-86  | 0.256716906 | 0.658 | 0.328 | 3.55E-82  | 8 ACO2       |
| 9.69E-41  | 0.256372459 | 0.984 | 0.771 | 3.11E-36  | 8 SETBP1     |
| 1.27E-78  | 0.255569335 | 0.676 | 0.355 | 4.08E-74  | 8 B4GALT5    |
| 1.66E-53  | 0.255518694 | 0.765 | 0.482 | 5.32E-49  | 8 RCOR3      |
| 6.85E-113 | 0.25477945  | 0.548 | 0.223 | 2.20E-108 | 8 ATP11C     |
| 2.21E-128 | 0.254775944 | 0.253 | 0.061 | 7.10E-124 | 8 SLC7A2     |
| 1.59E-69  | 0.254709229 | 0.771 | 0.419 | 5.09E-65  | 8 KCNJ3      |
| 7.96E-260 | 0.254404596 | 0.261 | 0.035 | 2.56E-255 | 8 SPAAR      |
| 1.18E-130 | 0.254087487 | 0.425 | 0.142 | 3.78E-126 | 8 ADH5       |
| 2.74E-75  | 0.253562514 | 0.529 | 0.259 | 8.78E-71  | 8 CEPT1      |
| 1.18E-147 | 0.25329071  | 0.316 | 0.081 | 3.78E-143 | 8 AC026992.2 |
| 8.92E-108 | 0.253080046 | 0.321 | 0.103 | 2.86E-103 | 8 LYRM1      |
| 7.42E-131 | 0.25273753  | 0.394 | 0.127 | 2.38E-126 | 8 GPAT4      |
| 7.21E-88  | 0.252704426 | 0.469 | 0.203 | 2.32E-83  | 8 CLDN12     |
| 8.44E-76  | 0.252314944 | 0.701 | 0.379 | 2.71E-71  | 8 PIKFYVE    |

|           |             |       |       |           |              |
|-----------|-------------|-------|-------|-----------|--------------|
| 7.00E-119 | 0.25231373  | 0.366 | 0.119 | 2.25E-114 | 8 SCRNB3     |
| 2.42E-115 | 0.252273148 | 0.653 | 0.293 | 7.78E-111 | 8 ZNF69      |
| 5.32E-103 | 0.252058643 | 0.376 | 0.135 | 1.71E-98  | 8 PPA1       |
| 3.15E-81  | 0.251815547 | 0.861 | 0.505 | 1.01E-76  | 8 HNF1A-AS1  |
| 2.30E-122 | 0.251586597 | 0.536 | 0.211 | 7.39E-118 | 8 RCAN1      |
| 5.74E-75  | 0.251514029 | 0.624 | 0.328 | 1.84E-70  | 8 ERI3       |
| 1.51E-75  | 0.25150122  | 0.752 | 0.419 | 4.84E-71  | 8 PRKRIP1    |
| 1.13E-127 | 0.251465436 | 0.364 | 0.113 | 3.63E-123 | 8 DRAM1      |
| 2.21E-140 | 0.251444751 | 0.301 | 0.079 | 7.10E-136 | 8 AC234917.1 |
| 6.20E-74  | 0.251153028 | 0.684 | 0.365 | 1.99E-69  | 8 KLHDC10    |
| 2.32E-100 | 0.251107997 | 0.373 | 0.133 | 7.46E-96  | 8 CA1        |
| 3.32E-165 | 0.250896099 | 0.32  | 0.077 | 1.06E-160 | 8 C16orf70   |
| 1.56E-110 | 0.250856717 | 0.333 | 0.107 | 5.01E-106 | 8 CAPN15     |
| 0         | 4.899348417 | 0.947 | 0.146 | 0         | 9 LDB2       |
| 0         | 4.839112315 | 0.866 | 0.055 | 0         | 9 EMCN       |
| 0         | 4.619323101 | 0.944 | 0.086 | 0         | 9 MEIS2      |
| 0         | 4.433080424 | 0.815 | 0.04  | 0         | 9 FLT1       |
| 0         | 4.262396601 | 0.94  | 0.375 | 0         | 9 PLPP1      |
| 0         | 4.1777439   | 0.917 | 0.026 | 0         | 9 PTPRB      |
| 0         | 3.873514887 | 0.909 | 0.226 | 0         | 9 EPAS1      |
| 0         | 3.625193438 | 0.817 | 0.056 | 0         | 9 SLCO2A1    |
| 0         | 3.46643764  | 0.73  | 0.226 | 0         | 9 SYN3       |
| 0         | 3.43745297  | 0.85  | 0.163 | 0         | 9 TCF4       |
| 0         | 3.33428105  | 0.904 | 0.211 | 0         | 9 ZEB1       |
| 0         | 3.259414371 | 0.766 | 0.053 | 0         | 9 RAPGEF4    |
| 0         | 3.242187349 | 0.807 | 0.046 | 0         | 9 TEK        |
| 0         | 3.118535674 | 0.514 | 0.019 | 0         | 9 PLAT       |
| 0         | 3.111157708 | 0.789 | 0.135 | 0         | 9 TMTC1      |
| 0         | 3.037569735 | 0.856 | 0.145 | 0         | 9 ELMO1      |
| 0         | 2.990886683 | 0.755 | 0.077 | 0         | 9 SH3RF3     |
| 0         | 2.931354591 | 0.577 | 0.066 | 0         | 9 CDH13      |
| 0         | 2.927274515 | 0.706 | 0.081 | 0         | 9 GNA14      |
| 0         | 2.917936137 | 0.792 | 0.017 | 0         | 9 EGFL7      |
| 0         | 2.89632971  | 0.905 | 0.247 | 0         | 9 AC098650.1 |
| 0         | 2.847585347 | 0.318 | 0.022 | 0         | 9 SLC2A3     |
| 0         | 2.846362491 | 0.692 | 0.082 | 0         | 9 NOSTRIN    |
| 1.97E-276 | 2.808785896 | 0.884 | 0.666 | 6.34E-272 | 9 SYNE1      |
| 0         | 2.799692308 | 0.757 | 0.033 | 0         | 9 PECAM1     |
| 0         | 2.7966711   | 0.672 | 0.016 | 0         | 9 PREX2      |
| 1.26E-267 | 2.77173816  | 0.618 | 0.219 | 4.06E-263 | 9 NRG3       |
| 0         | 2.750999737 | 0.518 | 0.04  | 0         | 9 HECW2      |
| 0         | 2.747532231 | 0.949 | 0.433 | 0         | 9 DOCK4      |
| 0         | 2.740721792 | 0.871 | 0.356 | 0         | 9 SEC14L1    |
| 0         | 2.654451644 | 0.764 | 0.027 | 0         | 9 ERG        |
| 0         | 2.652631515 | 0.663 | 0.008 | 0         | 9 ADGRL4     |
| 0         | 2.640021134 | 0.503 | 0.078 | 0         | 9 PDGFD      |
| 0         | 2.623754634 | 0.899 | 0.138 | 0         | 9 ST6GALNAC3 |
| 0         | 2.603197812 | 0.699 | 0.057 | 0         | 9 EBF1       |
| 0         | 2.507733518 | 0.885 | 0.401 | 0         | 9 ASAP1      |
| 0         | 2.499309718 | 0.586 | 0.121 | 0         | 9 CACNA1C    |
| 0         | 2.495000773 | 0.809 | 0.176 | 0         | 9 PRKCH      |

|           |             |       |       |           |              |
|-----------|-------------|-------|-------|-----------|--------------|
| 0         | 2.494336513 | 0.734 | 0.086 | 0         | 9 ARHGAP31   |
| 0         | 2.485443509 | 0.984 | 0.75  | 0         | 9 PTPRM      |
| 5.47E-118 | 2.479516742 | 0.592 | 0.365 | 1.76E-113 | 9 CHR3       |
| 0         | 2.475677546 | 0.61  | 0.142 | 0         | 9 PIK3R3     |
| 0         | 2.445495631 | 0.758 | 0.073 | 0         | 9 SHANK3     |
| 0         | 2.434644026 | 0.288 | 0.024 | 0         | 9 GPM6A      |
| 0         | 2.42547459  | 0.662 | 0.089 | 0         | 9 RAPGEF5    |
| 0         | 2.425372842 | 0.678 | 0.196 | 0         | 9 KALRN      |
| 0         | 2.412800812 | 0.881 | 0.505 | 0         | 9 RASAL2     |
| 0         | 2.374665822 | 0.74  | 0.23  | 0         | 9 SNED1      |
| 3.37E-239 | 2.354882517 | 0.742 | 0.382 | 1.08E-234 | 9 PITPNC1    |
| 0         | 2.353613206 | 0.796 | 0.356 | 0         | 9 ARHGAP26   |
| 1.08E-168 | 2.33796964  | 0.412 | 0.125 | 3.46E-164 | 9 AKAP12     |
| 0         | 2.322802209 | 0.653 | 0.099 | 0         | 9 EML1       |
| 4.98E-278 | 2.32219022  | 0.887 | 0.623 | 1.60E-273 | 9 PBX1       |
| 3.73E-171 | 2.299844336 | 0.627 | 0.331 | 1.20E-166 | 9 PLPP3      |
| 0         | 2.292433574 | 0.564 | 0.032 | 0         | 9 RUNX1T1    |
| 0         | 2.281934179 | 0.74  | 0.199 | 0         | 9 MEF2C      |
| 0         | 2.280826319 | 0.717 | 0.269 | 0         | 9 AC007319.1 |
| 2.92E-208 | 2.277371276 | 0.319 | 0.066 | 9.38E-204 | 9 ADAMTS6    |
| 0         | 2.270508294 | 0.331 | 0.034 | 0         | 9 ITGA8      |
| 4.71E-299 | 2.223909278 | 0.339 | 0.054 | 1.51E-294 | 9 EMP1       |
| 0         | 2.202760726 | 0.779 | 0.156 | 0         | 9 FBXL7      |
| 0         | 2.201748558 | 0.556 | 0.143 | 0         | 9 AC119674.1 |
| 0         | 2.180821853 | 0.743 | 0.339 | 0         | 9 DOCK9      |
| 6.82E-305 | 2.160279254 | 0.808 | 0.392 | 2.19E-300 | 9 GRB10      |
| 0         | 2.153063681 | 0.636 | 0.1   | 0         | 9 RBMS3      |
| 0         | 2.149732497 | 0.466 | 0.03  | 0         | 9 BTNL9      |
| 0         | 2.137109744 | 0.509 | 0.026 | 0         | 9 GFOD1      |
| 1.25E-305 | 2.106537846 | 0.673 | 0.245 | 4.03E-301 | 9 PLEKHG1    |
| 2.52E-264 | 2.094552154 | 0.644 | 0.247 | 8.10E-260 | 9 RARB       |
| 0         | 2.093559595 | 0.586 | 0.05  | 0         | 9 HEG1       |
| 0         | 2.073903533 | 0.91  | 0.575 | 0         | 9 SPTBN1     |
| 0         | 2.070085633 | 0.489 | 0.104 | 0         | 9 TIMP3      |
| 8.37E-285 | 2.055192406 | 0.717 | 0.322 | 2.69E-280 | 9 CDK17      |
| 0         | 2.046814198 | 0.92  | 0.59  | 0         | 9 UTRN       |
| 0         | 2.038402392 | 0.567 | 0.036 | 0         | 9 FLII       |
| 5.18E-230 | 2.032790417 | 0.284 | 0.049 | 1.66E-225 | 9 AC007100.1 |
| 1.68E-301 | 2.031608961 | 0.862 | 0.5   | 5.38E-297 | 9 TACC1      |
| 7.18E-233 | 2.025639793 | 0.711 | 0.359 | 2.31E-228 | 9 TGFB2      |
| 0         | 2.020937806 | 0.665 | 0.231 | 0         | 9 HIVEP3     |
| 4.10E-241 | 2.019560765 | 0.717 | 0.358 | 1.32E-236 | 9 PIP4K2A    |
| 0         | 2.015640458 | 0.374 | 0.061 | 0         | 9 ADGRB3     |
| 9.20E-198 | 1.994691738 | 0.505 | 0.183 | 2.95E-193 | 9 CMTM8      |
| 0         | 1.990164592 | 0.621 | 0.148 | 0         | 9 DLC1       |
| 0         | 1.960733775 | 0.613 | 0.13  | 0         | 9 ETS1       |
| 0         | 1.943082144 | 0.558 | 0.058 | 0         | 9 ENG        |
| 4.94E-293 | 1.935244237 | 0.323 | 0.049 | 1.59E-288 | 9 VEGFC      |
| 0         | 1.93137472  | 0.533 | 0.016 | 0         | 9 AC025569.1 |
| 3.67E-258 | 1.915050671 | 0.564 | 0.19  | 1.18E-253 | 9 ITGA9      |
| 1.89E-164 | 1.90158608  | 0.524 | 0.224 | 6.07E-160 | 9 SORBS1     |

|           |             |       |       |           |              |
|-----------|-------------|-------|-------|-----------|--------------|
| 0         | 1.869598666 | 0.823 | 0.424 | 0         | 9 SASH1      |
| 0         | 1.867983078 | 0.704 | 0.245 | 0         | 9 KLF7       |
| 0         | 1.864869926 | 0.567 | 0.037 | 0         | 9 LIMS2      |
| 0         | 1.85183652  | 0.344 | 0.01  | 0         | 9 CAVIN2     |
| 0         | 1.845874165 | 0.289 | 0.004 | 0         | 9 AC010737.1 |
| 0         | 1.838531284 | 0.416 | 0.045 | 0         | 9 PDLIM1     |
| 0         | 1.83757165  | 0.45  | 0.04  | 0         | 9 EFN2       |
| 0         | 1.83574124  | 0.522 | 0.075 | 0         | 9 CHST11     |
| 8.16E-255 | 1.827279061 | 0.752 | 0.38  | 2.62E-250 | 9 DN3        |
| 1.73E-303 | 1.825511768 | 0.498 | 0.122 | 5.54E-299 | 9 NCALD      |
| 0         | 1.819208511 | 0.596 | 0.078 | 0         | 9 FGD5       |
| 1.45E-303 | 1.815532946 | 0.899 | 0.648 | 4.67E-299 | 9 APP        |
| 1.89E-291 | 1.809419918 | 0.761 | 0.307 | 6.06E-287 | 9 LDLRAD4    |
| 1.60E-272 | 1.809346384 | 0.457 | 0.107 | 5.15E-268 | 9 IGF2       |
| 1.96E-288 | 1.807177257 | 0.945 | 0.826 | 6.28E-284 | 9 PTPRG      |
| 2.38E-128 | 1.806489796 | 0.692 | 0.528 | 7.64E-124 | 9 ANKRD1A    |
| 2.70E-199 | 1.802666261 | 0.619 | 0.274 | 8.66E-195 | 9 SEMA6A     |
| 0         | 1.794933573 | 0.513 | 0.074 | 0         | 9 CHN1       |
| 0         | 1.766316663 | 0.482 | 0.052 | 0         | 9 DYSF       |
| 0         | 1.748474159 | 0.52  | 0.037 | 0         | 9 PREX1      |
| 0         | 1.73797118  | 0.476 | 0.034 | 0         | 9 HIF3A      |
| 0         | 1.734552603 | 0.394 | 0.046 | 0         | 9 PALMD      |
| 0         | 1.727950189 | 0.53  | 0.126 | 0         | 9 LIPE-AS1   |
| 3.37E-211 | 1.718542616 | 0.717 | 0.333 | 1.08E-206 | 9 ST6GAL1    |
| 1.13E-137 | 1.714984041 | 0.587 | 0.298 | 3.64E-133 | 9 PALM2AKAP2 |
| 0         | 1.712969341 | 0.526 | 0.087 | 0         | 9 NAV1       |
| 0         | 1.709162536 | 0.317 | 0.008 | 0         | 9 CRHBP      |
| 1.56E-216 | 1.69463206  | 0.511 | 0.17  | 5.01E-212 | 9 PELI1      |
| 2.72E-230 | 1.692257764 | 0.719 | 0.366 | 8.75E-226 | 9 PEAK1      |
| 1.12E-252 | 1.684872598 | 0.659 | 0.279 | 3.58E-248 | 9 RBMS2      |
| 5.73E-230 | 1.671086647 | 0.799 | 0.515 | 1.84E-225 | 9 BMP2       |
| 0         | 1.664228648 | 0.421 | 0.014 | 0         | 9 RAMP3      |
| 4.38E-302 | 1.660599652 | 0.618 | 0.2   | 1.41E-297 | 9 SERPINE6   |
| 4.13E-246 | 1.652445288 | 0.552 | 0.172 | 1.33E-241 | 9 PCED1B     |
| 0         | 1.651291727 | 0.597 | 0.086 | 0         | 9 FYN        |
| 0         | 1.632838073 | 0.401 | 0.013 | 0         | 9 KLF2       |
| 9.01E-182 | 1.631852048 | 0.698 | 0.413 | 2.89E-177 | 9 IL6ST      |
| 5.41E-211 | 1.624770715 | 0.38  | 0.093 | 1.74E-206 | 9 ZNF521     |
| 0         | 1.623283899 | 0.472 | 0.056 | 0         | 9 IL4R       |
| 0         | 1.600623211 | 0.53  | 0.101 | 0         | 9 IRAK3      |
| 0         | 1.59935447  | 0.447 | 0.04  | 0         | 9 HLA-DRB1   |
| 0         | 1.59901518  | 0.391 | 0.066 | 0         | 9 STOM       |
| 2.38E-307 | 1.587296655 | 0.4   | 0.074 | 7.64E-303 | 9 CYR1-AS1   |
| 0         | 1.581544203 | 0.459 | 0.089 | 0         | 9 LHFPL6     |
| 6.08E-273 | 1.581202613 | 0.438 | 0.102 | 1.95E-268 | 9 HSPG2      |
| 0         | 1.569301291 | 0.441 | 0.019 | 0         | 9 C22orf34   |
| 0         | 1.562935743 | 0.41  | 0.014 | 0         | 9 SLC9A3R2   |
| 1.52E-293 | 1.559868451 | 0.407 | 0.08  | 4.88E-289 | 9 ENTPD1     |
| 7.45E-274 | 1.553265085 | 0.89  | 0.625 | 2.39E-269 | 9 AKT3       |
| 0         | 1.550213872 | 0.257 | 0.026 | 0         | 9 PTPRR      |
| 9.19E-83  | 1.54888435  | 0.306 | 0.119 | 2.95E-78  | 9 NAV3       |

|           |             |       |       |           |              |
|-----------|-------------|-------|-------|-----------|--------------|
| 0         | 1.548133956 | 0.357 | 0.02  | 0         | 9 IFI44L     |
| 6.59E-86  | 1.544663198 | 0.474 | 0.266 | 2.12E-81  | 9 NHSL1      |
| 1.13E-246 | 1.541263305 | 0.499 | 0.144 | 3.64E-242 | 9 FAT4       |
| 0         | 1.53555207  | 0.815 | 0.159 | 0         | 9 ADGRF5     |
| 0         | 1.535517695 | 0.452 | 0.007 | 0         | 9 NOTCH4     |
| 1.48E-242 | 1.529670577 | 0.777 | 0.34  | 4.76E-238 | 9 CNTNAP3B   |
| 6.89E-115 | 1.528542372 | 0.626 | 0.412 | 2.21E-110 | 9 TBC1D8     |
| 5.15E-246 | 1.523939196 | 0.325 | 0.059 | 1.65E-241 | 9 KCNMB4     |
| 0         | 1.52181579  | 0.435 | 0.043 | 0         | 9 IFI44      |
| 6.65E-187 | 1.516639672 | 0.448 | 0.147 | 2.14E-182 | 9 AC119674.2 |
| 0         | 1.513558488 | 0.463 | 0.02  | 0         | 9 ARAP3      |
| 4.48E-264 | 1.508179291 | 0.48  | 0.124 | 1.44E-259 | 9 NXN        |
| 5.30E-162 | 1.503882877 | 0.735 | 0.535 | 1.70E-157 | 9 PIK3C2A    |
| 4.55E-244 | 1.499952055 | 0.599 | 0.214 | 1.46E-239 | 9 ZBTB46     |
| 9.95E-84  | 1.498287558 | 0.662 | 0.523 | 3.20E-79  | 9 LIFR       |
| 1.77E-126 | 1.481073904 | 0.42  | 0.162 | 5.69E-122 | 9 SGK1       |
| 1.31E-116 | 1.479120166 | 0.254 | 0.069 | 4.21E-112 | 9 RXFP1      |
| 6.37E-174 | 1.479024652 | 0.742 | 0.464 | 2.05E-169 | 9 FCHSD2     |
| 2.29E-153 | 1.478299754 | 0.792 | 0.61  | 7.36E-149 | 9 RBMS1      |
| 0         | 1.471843467 | 0.403 | 0.058 | 0         | 9 CD109      |
| 7.55E-199 | 1.463929583 | 0.46  | 0.146 | 2.42E-194 | 9 FAR2       |
| 5.31E-226 | 1.462539947 | 0.408 | 0.102 | 1.70E-221 | 9 SMAD6      |
| 4.16E-22  | 1.462447273 | 0.412 | 0.336 | 1.34E-17  | 9 EXOC6      |
| 0         | 1.445327412 | 0.325 | 0.005 | 0         | 9 KDR        |
| 3.57E-185 | 1.443874645 | 0.642 | 0.307 | 1.15E-180 | 9 PARP14     |
| 4.36E-106 | 1.434104997 | 0.647 | 0.425 | 1.40E-101 | 9 CMAHP      |
| 0         | 1.431025641 | 0.361 | 0.03  | 0         | 9 CEACAM1    |
| 7.17E-113 | 1.427785501 | 0.541 | 0.285 | 2.30E-108 | 9 FUT8       |
| 0         | 1.426018091 | 0.448 | 0.063 | 0         | 9 ELK3       |
| 0         | 1.425606145 | 0.397 | 0.025 | 0         | 9 HLA-DRB5   |
| 2.11E-199 | 1.421956975 | 0.578 | 0.226 | 6.77E-195 | 9 EVA1C      |
| 0         | 1.404018279 | 0.385 | 0.008 | 0         | 9 ADCY4      |
| 1.15E-179 | 1.403762761 | 0.417 | 0.13  | 3.70E-175 | 9 RASGRP3    |
| 0         | 1.403010238 | 0.468 | 0.078 | 0         | 9 HLA-E      |
| 0         | 1.398966799 | 0.452 | 0.046 | 0         | 9 IFI16      |
| 0         | 1.397845023 | 0.405 | 0.011 | 0         | 9 SH2D3C     |
| 5.04E-271 | 1.369264396 | 0.717 | 0.287 | 1.62E-266 | 9 SRGAP2     |
| 8.84E-182 | 1.361439766 | 0.818 | 0.505 | 2.84E-177 | 9 NFIA       |
| 3.41E-70  | 1.359976082 | 0.676 | 0.557 | 1.10E-65  | 9 ADGRL2     |
| 4.19E-153 | 1.355091033 | 0.61  | 0.312 | 1.35E-148 | 9 KLHL5      |
| 1.44E-81  | 1.353976176 | 0.542 | 0.356 | 4.62E-77  | 9 CNN3       |
| 0         | 1.351728708 | 0.361 | 0.005 | 0         | 9 CD34       |
| 0         | 1.347562747 | 0.499 | 0.103 | 0         | 9 PODXL      |
| 0         | 1.347454458 | 0.38  | 0.013 | 0         | 9 PLXND1     |
| 2.01E-60  | 1.34726664  | 0.419 | 0.248 | 6.44E-56  | 9 PGM5       |
| 4.00E-62  | 1.346144182 | 0.279 | 0.116 | 1.28E-57  | 9 MT2A       |
| 1.25E-115 | 1.337567558 | 0.651 | 0.412 | 4.02E-111 | 9 GSE1       |
| 1.04E-118 | 1.334020569 | 0.667 | 0.439 | 3.32E-114 | 9 RIN2       |
| 1.55E-118 | 1.331016229 | 0.731 | 0.554 | 4.99E-114 | 9 RALGAPA2   |
| 0         | 1.328513494 | 0.35  | 0.016 | 0         | 9 TAMALIN    |
| 2.37E-61  | 1.314875096 | 0.479 | 0.275 | 7.60E-57  | 9 PCSK5      |

|           |             |       |       |           |              |
|-----------|-------------|-------|-------|-----------|--------------|
| 1.65E-154 | 1.310167081 | 0.698 | 0.428 | 5.30E-150 | 9 SP100      |
| 1.28E-186 | 1.303886135 | 0.383 | 0.105 | 4.11E-182 | 9 ETS2       |
| 8.79E-207 | 1.30229979  | 0.871 | 0.685 | 2.82E-202 | 9 GNAQ       |
| 0         | 1.301289855 | 0.379 | 0.019 | 0         | 9 AFAP1L1    |
| 0         | 1.301285557 | 0.352 | 0.019 | 0         | 9 ITPRIP     |
| 6.20E-106 | 1.298823222 | 0.679 | 0.504 | 1.99E-101 | 9 ARGLU1     |
| 0         | 1.29848786  | 0.397 | 0.066 | 0         | 9 FBN1       |
| 1.22E-146 | 1.29693518  | 0.62  | 0.33  | 3.92E-142 | 9 MAP4K4     |
| 7.90E-165 | 1.294848533 | 0.5   | 0.2   | 2.54E-160 | 9 SWAP70     |
| 3.53E-169 | 1.294100754 | 0.35  | 0.094 | 1.13E-164 | 9 EPHA4      |
| 0         | 1.29354761  | 0.335 | 0.01  | 0         | 9 GIMAP8     |
| 1.37E-90  | 1.289073125 | 0.523 | 0.31  | 4.41E-86  | 9 YES1       |
| 9.23E-146 | 1.288823876 | 0.489 | 0.198 | 2.97E-141 | 9 OSMR       |
| 7.35E-183 | 1.285663752 | 0.544 | 0.2   | 2.36E-178 | 9 TCF7L1     |
| 1.71E-111 | 1.285261681 | 0.64  | 0.39  | 5.51E-107 | 9 STOX2      |
| 0         | 1.279573573 | 0.317 | 0.009 | 0         | 9 ZNF366     |
| 0         | 1.275795692 | 0.292 | 0.026 | 0         | 9 CFAP161    |
| 2.07E-32  | 1.272871313 | 0.633 | 0.589 | 6.63E-28  | 9 MIR99AHG   |
| 8.46E-106 | 1.271932415 | 0.572 | 0.337 | 2.72E-101 | 9 ITGA1      |
| 0         | 1.270693911 | 0.329 | 0.012 | 0         | 9 RHOJ       |
| 0         | 1.269424484 | 0.315 | 0.015 | 0         | 9 CLEC1A     |
| 1.98E-121 | 1.269073208 | 0.659 | 0.443 | 6.37E-117 | 9 NCOA3      |
| 0         | 1.263686832 | 0.298 | 0.016 | 0         | 9 FLT4       |
| 1.45E-100 | 1.262150758 | 0.71  | 0.576 | 4.64E-96  | 9 PIAS1      |
| 1.23E-93  | 1.261423862 | 0.607 | 0.413 | 3.96E-89  | 9 RAPGEF1    |
| 3.00E-13  | 1.258831939 | 0.417 | 0.38  | 9.63E-09  | 9 ATP13A3    |
| 0         | 1.258060843 | 0.35  | 0.054 | 0         | 9 ID1        |
| 0         | 1.256912241 | 0.342 | 0.019 | 0         | 9 SLC5A4-AS1 |
| 2.03E-177 | 1.256738209 | 0.547 | 0.206 | 6.53E-173 | 9 SLCO3A1    |
| 1.06E-78  | 1.254854125 | 0.563 | 0.373 | 3.40E-74  | 9 ANO6       |
| 2.72E-130 | 1.253387724 | 0.583 | 0.316 | 8.73E-126 | 9 PTPN12     |
| 2.41E-72  | 1.250651035 | 0.487 | 0.282 | 7.75E-68  | 9 DHRS3      |
| 4.90E-163 | 1.246926045 | 0.851 | 0.636 | 1.57E-158 | 9 TTC28      |
| 1.96E-129 | 1.244632695 | 0.747 | 0.531 | 6.31E-125 | 9 PPFIBP1    |
| 9.43E-210 | 1.242319884 | 0.454 | 0.129 | 3.03E-205 | 9 EPB41L2    |
| 5.19E-92  | 1.242137974 | 0.543 | 0.327 | 1.67E-87  | 9 ZNF438     |
| 4.32E-146 | 1.239363113 | 0.554 | 0.261 | 1.39E-141 | 9 TBCD       |
| 4.23E-162 | 1.238921233 | 0.336 | 0.091 | 1.36E-157 | 9 WARS1      |
| 1.81E-87  | 1.236886392 | 0.533 | 0.314 | 5.80E-83  | 9 RASGRF2    |
| 6.70E-91  | 1.235386268 | 0.643 | 0.475 | 2.15E-86  | 9 HMBOX1     |
| 2.73E-192 | 1.23212896  | 0.431 | 0.122 | 8.78E-188 | 9 SH3BP5     |
| 0         | 1.232108234 | 0.38  | 0.04  | 0         | 9 NLRP1      |
| 0         | 1.228108444 | 0.326 | 0.013 | 0         | 9 PCAT19     |
| 2.82E-170 | 1.227567296 | 0.28  | 0.059 | 9.07E-166 | 9 AC007744.1 |
| 0         | 1.226540201 | 0.345 | 0.033 | 0         | 9 SPAAR      |
| 7.41E-182 | 1.224503695 | 0.893 | 0.653 | 2.38E-177 | 9 LIMCH1     |
| 9.93E-142 | 1.223788941 | 0.341 | 0.103 | 3.19E-137 | 9 F8         |
| 1.56E-118 | 1.223582593 | 0.416 | 0.168 | 5.00E-114 | 9 PLSCR4     |
| 6.10E-135 | 1.213058144 | 0.758 | 0.543 | 1.96E-130 | 9 EPB41L4A   |
| 1.76E-112 | 1.206033194 | 0.446 | 0.196 | 5.66E-108 | 9 CD9        |
| 0         | 1.205827401 | 0.254 | 0.005 | 0         | 9 LRRC32     |

|           |             |       |       |           |              |
|-----------|-------------|-------|-------|-----------|--------------|
| 1.88E-81  | 1.189175173 | 0.53  | 0.326 | 6.03E-77  | 9 RPS6KA2    |
| 0         | 1.185947312 | 0.307 | 0.023 | 0         | 9 PALD1      |
| 2.60E-89  | 1.174890036 | 0.603 | 0.408 | 8.33E-85  | 9 CTNNB1     |
| 0         | 1.174851432 | 0.323 | 0.003 | 0         | 9 ROBO4      |
| 4.83E-158 | 1.174029625 | 0.444 | 0.158 | 1.55E-153 | 9 DOCK6      |
| 1.01E-169 | 1.172993841 | 0.867 | 0.539 | 3.24E-165 | 9 ZBTB16     |
| 9.17E-197 | 1.16899905  | 0.413 | 0.116 | 2.94E-192 | 9 RNF144A    |
| 1.76E-75  | 1.168500804 | 0.44  | 0.249 | 5.67E-71  | 9 PDIA5      |
| 6.55E-168 | 1.166077067 | 0.641 | 0.276 | 2.10E-163 | 9 CNTNAP3P2  |
| 8.32E-104 | 1.163816678 | 0.412 | 0.181 | 2.67E-99  | 9 CTTNBP2NL  |
| 1.35E-79  | 1.162272542 | 0.534 | 0.324 | 4.32E-75  | 9 ANKRD44    |
| 0         | 1.156476934 | 0.272 | 0.026 | 0         | 9 LINC02384  |
| 3.29E-171 | 1.15045277  | 0.421 | 0.128 | 1.06E-166 | 9 CAMK1D     |
| 3.43E-100 | 1.141836695 | 0.566 | 0.322 | 1.10E-95  | 9 MCC        |
| 0         | 1.14104098  | 0.323 | 0.039 | 0         | 9 SMAD9      |
| 1.90E-122 | 1.136823211 | 0.734 | 0.528 | 6.10E-118 | 9 DPYD       |
| 2.25E-103 | 1.132603667 | 0.586 | 0.358 | 7.23E-99  | 9 KIAA1671   |
| 2.47E-115 | 1.131177136 | 0.715 | 0.506 | 7.94E-111 | 9 TANC1      |
| 4.59E-157 | 1.130373999 | 0.457 | 0.166 | 1.48E-152 | 9 ADARB1     |
| 1.23E-228 | 1.127184803 | 0.255 | 0.038 | 3.95E-224 | 9 PTPRE      |
| 7.02E-65  | 1.125147757 | 0.426 | 0.228 | 2.25E-60  | 9 RGL1       |
| 1.05E-54  | 1.124953239 | 0.546 | 0.411 | 3.37E-50  | 9 AF241726.1 |
| 1.36E-231 | 1.123875917 | 0.326 | 0.063 | 4.37E-227 | 9 AC093423.2 |
| 0         | 1.1225325   | 0.277 | 0.006 | 0         | 9 TMEM255B   |
| 0         | 1.121230667 | 0.308 | 0.014 | 0         | 9 TOX2       |
| 1.93E-51  | 1.118804385 | 0.336 | 0.175 | 6.18E-47  | 9 DOK6       |
| 1.84E-73  | 1.117686834 | 0.71  | 0.566 | 5.91E-69  | 9 WWTR1      |
| 2.11E-148 | 1.114553578 | 0.346 | 0.098 | 6.79E-144 | 9 C1orf21    |
| 2.06E-151 | 1.113240894 | 0.546 | 0.232 | 6.62E-147 | 9 ABR        |
| 1.21E-197 | 1.10927728  | 0.331 | 0.075 | 3.88E-193 | 9 DGKE       |
| 2.00E-96  | 1.108874415 | 0.664 | 0.432 | 6.44E-92  | 9 NCOA7      |
| 4.08E-21  | 1.104604308 | 0.441 | 0.363 | 1.31E-16  | 9 NTN4       |
| 1.44E-88  | 1.104581508 | 0.55  | 0.311 | 4.62E-84  | 9 DUSP1      |
| 0         | 1.100325738 | 0.289 | 0.02  | 0         | 9 BOC        |
| 1.60E-82  | 1.100184152 | 0.648 | 0.471 | 5.15E-78  | 9 RAP1B      |
| 0         | 1.098687656 | 0.324 | 0.013 | 0         | 9 SHE        |
| 1.07E-91  | 1.096245471 | 0.679 | 0.497 | 3.44E-87  | 9 RFX3       |
| 3.90E-70  | 1.095614674 | 0.367 | 0.185 | 1.25E-65  | 9 MEF2C-AS1  |
| 3.19E-51  | 1.093944114 | 0.492 | 0.355 | 1.03E-46  | 9 AL136531.2 |
| 5.96E-101 | 1.092809441 | 0.624 | 0.369 | 1.92E-96  | 9 FRMD4B     |
| 1.44E-132 | 1.090671286 | 0.252 | 0.061 | 4.62E-128 | 9 NUAK1      |
| 0         | 1.089757828 | 0.3   | 0.004 | 0         | 9 CDH5       |
| 1.14E-131 | 1.089216889 | 0.349 | 0.111 | 3.67E-127 | 9 JAM3       |
| 7.42E-127 | 1.088828167 | 0.283 | 0.077 | 2.38E-122 | 9 CPAMD8     |
| 1.13E-129 | 1.086158517 | 0.823 | 0.685 | 3.63E-125 | 9 MEF2A      |
| 4.91E-189 | 1.083427163 | 0.632 | 0.27  | 1.58E-184 | 9 SRGAP2C    |
| 6.62E-91  | 1.082095881 | 0.565 | 0.338 | 2.13E-86  | 9 PRSS23     |
| 2.09E-97  | 1.072638499 | 0.354 | 0.142 | 6.70E-93  | 9 EHD4       |
| 0         | 1.069259968 | 0.282 | 0.008 | 0         | 9 GPSM3      |
| 0         | 1.064674861 | 0.324 | 0.044 | 0         | 9 ZNF423     |
| 5.80E-185 | 1.064100535 | 0.608 | 0.252 | 1.86E-180 | 9 SRGAP2B    |

|           |             |       |       |           |              |
|-----------|-------------|-------|-------|-----------|--------------|
| 4.40E-118 | 1.061090807 | 0.823 | 0.692 | 1.41E-113 | 9 CDC42BPA   |
| 1.25E-157 | 1.056664991 | 0.459 | 0.151 | 4.00E-153 | 9 PPP1R16B   |
| 1.46E-114 | 1.055444327 | 0.436 | 0.179 | 4.70E-110 | 9 PLXNA2     |
| 3.95E-163 | 1.054568176 | 0.329 | 0.083 | 1.27E-158 | 9 GRK5       |
| 0         | 1.054074838 | 0.339 | 0.047 | 0         | 9 INPP5D     |
| 6.44E-67  | 1.052570453 | 0.492 | 0.314 | 2.07E-62  | 9 KLF9       |
| 8.09E-98  | 1.044861997 | 0.591 | 0.359 | 2.60E-93  | 9 FNBP1      |
| 2.62E-226 | 1.044582399 | 0.332 | 0.066 | 8.42E-222 | 9 LRRC8C     |
| 6.11E-216 | 1.043513269 | 0.312 | 0.06  | 1.96E-211 | 9 CD74       |
| 3.60E-98  | 1.041545675 | 0.431 | 0.196 | 1.16E-93  | 9 ATP2B4     |
| 1.27E-119 | 1.036883281 | 0.262 | 0.069 | 4.07E-115 | 9 RIPOR2     |
| 0         | 1.036112064 | 0.279 | 0.011 | 0         | 9 RASIP1     |
| 3.49E-89  | 1.032648666 | 0.444 | 0.221 | 1.12E-84  | 9 ABCC1      |
| 4.44E-88  | 1.029652652 | 0.25  | 0.081 | 1.43E-83  | 9 AC002070.1 |
| 1.26E-59  | 1.028510976 | 0.273 | 0.116 | 4.06E-55  | 9 ANKRD55    |
| 2.30E-70  | 1.020705116 | 0.595 | 0.424 | 7.38E-66  | 9 CEP112     |
| 5.72E-213 | 1.018271495 | 0.397 | 0.097 | 1.84E-208 | 9 A2M        |
| 1.44E-84  | 1.016719875 | 0.663 | 0.505 | 4.61E-80  | 9 RB1        |
| 0         | 1.014067687 | 0.271 | 0.009 | 0         | 9 PDE2A      |
| 0         | 1.013927869 | 0.311 | 0.016 | 0         | 9 XAF1       |
| 0         | 1.010841757 | 0.292 | 0.005 | 0         | 9 NOVA2      |
| 7.59E-190 | 1.009252819 | 0.788 | 0.342 | 2.44E-185 | 9 PLCB1      |
| 1.13E-123 | 1.003018837 | 0.388 | 0.142 | 3.64E-119 | 9 AMOTL1     |
| 8.29E-95  | 1.002394932 | 0.566 | 0.327 | 2.66E-90  | 9 LIMA1      |
| 1.49E-45  | 0.999521785 | 0.604 | 0.519 | 4.78E-41  | 9 ITSN2      |
| 3.46E-212 | 0.991215397 | 0.252 | 0.04  | 1.11E-207 | 9 AC090630.1 |
| 2.53E-53  | 0.987538293 | 0.539 | 0.389 | 8.14E-49  | 9 PHLPP1     |
| 2.24E-125 | 0.986893709 | 0.52  | 0.225 | 7.20E-121 | 9 CNTNAP3    |
| 1.73E-116 | 0.985431596 | 0.439 | 0.181 | 5.55E-112 | 9 NEDD4      |
| 8.50E-270 | 0.984436603 | 0.316 | 0.05  | 2.73E-265 | 9 PIK3C2B    |
| 4.73E-172 | 0.984170887 | 0.317 | 0.076 | 1.52E-167 | 9 FMNL3      |
| 2.36E-67  | 0.981770962 | 0.454 | 0.27  | 7.58E-63  | 9 CNST       |
| 3.42E-89  | 0.980338584 | 0.729 | 0.593 | 1.10E-84  | 9 RBFOX2     |
| 0         | 0.980127417 | 0.252 | 0.004 | 0         | 9 ARHGEF15   |
| 3.50E-47  | 0.976676478 | 0.556 | 0.437 | 1.12E-42  | 9 KIF13A     |
| 2.01E-71  | 0.976104139 | 0.55  | 0.373 | 6.45E-67  | 9 GARRE1     |
| 7.32E-81  | 0.974881776 | 0.262 | 0.089 | 2.35E-76  | 9 MAP2       |
| 1.20E-34  | 0.974307921 | 0.592 | 0.506 | 3.86E-30  | 9 TANC2      |
| 1.16E-58  | 0.97241062  | 0.45  | 0.275 | 3.73E-54  | 9 PLSCR1     |
| 6.10E-99  | 0.966570577 | 0.396 | 0.171 | 1.96E-94  | 9 CARD8      |
| 4.68E-152 | 0.965824164 | 0.442 | 0.153 | 1.50E-147 | 9 SRGAP2D    |
| 2.22E-71  | 0.964096343 | 0.755 | 0.656 | 7.14E-67  | 9 HIPK2      |
| 4.71E-58  | 0.95874091  | 0.647 | 0.504 | 1.51E-53  | 9 ARHGEF3    |
| 2.57E-64  | 0.954210869 | 0.623 | 0.47  | 8.25E-60  | 9 ETV6       |
| 1.80E-76  | 0.946975153 | 0.615 | 0.425 | 5.78E-72  | 9 CPNE8      |
| 7.17E-92  | 0.944610548 | 0.357 | 0.147 | 2.30E-87  | 9 LIMK2      |
| 4.35E-97  | 0.943787146 | 0.484 | 0.222 | 1.40E-92  | 9 CLIC4      |
| 1.59E-37  | 0.94364842  | 0.329 | 0.19  | 5.12E-33  | 9 ZFP36      |
| 0         | 0.943034878 | 0.277 | 0.024 | 0         | 9 KANK3      |
| 4.71E-35  | 0.94211494  | 0.525 | 0.375 | 1.51E-30  | 9 SOX5       |
| 2.98E-119 | 0.94203349  | 0.315 | 0.099 | 9.57E-115 | 9 DDX60      |



|           |             |       |       |           |            |
|-----------|-------------|-------|-------|-----------|------------|
| 1.98E-98  | 0.939416559 | 0.714 | 0.502 | 6.35E-94  | 9 UACA     |
| 3.75E-60  | 0.935565346 | 0.494 | 0.327 | 1.20E-55  | 9 RIMKLB   |
| 1.84E-220 | 0.932200705 | 0.305 | 0.057 | 5.91E-216 | 9 STARD9   |
| 3.97E-28  | 0.930965518 | 0.256 | 0.146 | 1.27E-23  | 9 RYR3     |
| 1.56E-54  | 0.930930897 | 0.626 | 0.515 | 5.01E-50  | 9 DNAJC1   |
| 1.10E-119 | 0.929875783 | 0.382 | 0.139 | 3.53E-115 | 9 TNS2     |
| 3.50E-72  | 0.926966407 | 0.544 | 0.313 | 1.12E-67  | 9 NRP1     |
| 0         | 0.922844422 | 0.258 | 0.005 | 0         | 9 TIE1     |
| 1.96E-68  | 0.914642995 | 0.468 | 0.266 | 6.29E-64  | 9 MSN      |
| 1.36E-67  | 0.913629797 | 0.762 | 0.651 | 4.35E-63  | 9 PRKCE    |
| 6.94E-69  | 0.911384938 | 0.433 | 0.231 | 2.23E-64  | 9 ATP11C   |
| 3.50E-05  | 0.906328786 | 0.483 | 0.627 | 1         | 9 KCNIP4   |
| 3.07E-55  | 0.905721663 | 0.371 | 0.204 | 9.85E-51  | 9 CYTH3    |
| 2.40E-22  | 0.903866326 | 0.582 | 0.533 | 7.70E-18  | 9 VGLL4    |
| 9.23E-173 | 0.903787992 | 0.308 | 0.071 | 2.96E-168 | 9 CIITA    |
| 8.09E-46  | 0.90302415  | 0.377 | 0.227 | 2.60E-41  | 9 GSN      |
| 2.82E-84  | 0.90204294  | 0.397 | 0.183 | 9.06E-80  | 9 DENND3   |
| 1.78E-85  | 0.90177724  | 0.725 | 0.601 | 5.72E-81  | 9 FRYL     |
| 4.70E-86  | 0.900501781 | 0.721 | 0.564 | 1.51E-81  | 9 CFLAR    |
| 1.37E-36  | 0.900353358 | 0.583 | 0.481 | 4.39E-32  | 9 FMNL2    |
| 2.92E-77  | 0.900112581 | 0.875 | 0.833 | 9.39E-73  | 9 JMJD1C   |
| 8.42E-65  | 0.900089512 | 0.558 | 0.364 | 2.70E-60  | 9 DLEU2    |
| 1.25E-60  | 0.899683618 | 0.593 | 0.451 | 4.01E-56  | 9 RNF115   |
| 1.21E-42  | 0.899318529 | 0.48  | 0.347 | 3.89E-38  | 9 ADIPOR2  |
| 2.37E-104 | 0.895651597 | 0.543 | 0.269 | 7.61E-100 | 9 CALD1    |
| 1.02E-133 | 0.891271992 | 0.251 | 0.059 | 3.28E-129 | 9 DISC1    |
| 3.42E-39  | 0.889836024 | 0.27  | 0.143 | 1.10E-34  | 9 NUCB2    |
| 3.78E-63  | 0.888687117 | 0.612 | 0.424 | 1.21E-58  | 9 COL4A2   |
| 1.92E-30  | 0.887886036 | 0.303 | 0.186 | 6.18E-26  | 9 TACR1    |
| 6.28E-85  | 0.887610133 | 0.273 | 0.092 | 2.02E-80  | 9 MSRB3    |
| 1.51E-45  | 0.886508047 | 0.661 | 0.571 | 4.85E-41  | 9 MTSS1    |
| 1.05E-214 | 0.884550573 | 0.334 | 0.064 | 3.38E-210 | 9 MEG3     |
| 1.13E-71  | 0.882244464 | 0.283 | 0.11  | 3.63E-67  | 9 AR       |
| 9.68E-118 | 0.880556083 | 0.346 | 0.117 | 3.11E-113 | 9 HLA-B    |
| 1.00E-131 | 0.880105097 | 0.303 | 0.087 | 3.22E-127 | 9 AP1S2    |
| 0         | 0.876437791 | 0.258 | 0.011 | 0         | 9 JCAD     |
| 1.43E-51  | 0.876386708 | 0.764 | 0.681 | 4.60E-47  | 9 PLXDC2   |
| 2.31E-87  | 0.875564862 | 0.73  | 0.547 | 7.43E-83  | 9 ARHGAP29 |
| 7.28E-107 | 0.872279909 | 0.367 | 0.139 | 2.34E-102 | 9 HLA-C    |
| 1.62E-37  | 0.870295949 | 0.326 | 0.188 | 5.19E-33  | 9 PRELID2  |
| 1.33E-83  | 0.869510636 | 0.344 | 0.147 | 4.27E-79  | 9 WWC3     |
| 2.62E-250 | 0.869000526 | 0.252 | 0.034 | 8.40E-246 | 9 TMOD1    |
| 1.97E-88  | 0.866815116 | 0.431 | 0.208 | 6.32E-84  | 9 TSPAN14  |
| 0         | 0.866470899 | 0.266 | 0.006 | 0         | 9 APOL3    |
| 4.06E-47  | 0.863177968 | 0.303 | 0.151 | 1.30E-42  | 9 SIPA1L2  |
| 6.72E-79  | 0.862710952 | 0.75  | 0.637 | 2.16E-74  | 9 QKI      |
| 6.43E-54  | 0.862143333 | 0.474 | 0.299 | 2.06E-49  | 9 NR3C1    |
| 0         | 0.862059323 | 0.256 | 0.018 | 0         | 9 CALCRL   |
| 4.72E-43  | 0.859337987 | 0.643 | 0.528 | 1.51E-38  | 9 MAML3    |
| 7.97E-73  | 0.857222355 | 0.691 | 0.559 | 2.56E-68  | 9 KAT6A    |
| 4.74E-99  | 0.855356508 | 0.298 | 0.101 | 1.52E-94  | 9 GFOD2    |

|           |             |       |       |           |                |
|-----------|-------------|-------|-------|-----------|----------------|
| 2.70E-71  | 0.855254933 | 0.443 | 0.247 | 8.69E-67  | 9 IRF1-AS1     |
| 3.01E-155 | 0.853469217 | 0.278 | 0.063 | 9.66E-151 | 9 IFITM3       |
| 1.78E-62  | 0.851948897 | 0.735 | 0.651 | 5.72E-58  | 9 HERC1        |
| 6.61E-46  | 0.85072319  | 0.618 | 0.491 | 2.12E-41  | 9 SH3D19       |
| 3.67E-67  | 0.850620409 | 0.463 | 0.247 | 1.18E-62  | 9 TGFBR3       |
| 3.78E-47  | 0.847435431 | 0.591 | 0.474 | 1.22E-42  | 9 SNRK         |
| 3.40E-50  | 0.844411468 | 0.297 | 0.146 | 1.09E-45  | 9 FGFR1        |
| 6.22E-58  | 0.84404912  | 0.521 | 0.331 | 2.00E-53  | 9 AL139807.1   |
| 4.86E-80  | 0.839637446 | 0.372 | 0.17  | 1.56E-75  | 9 B2M          |
| 8.59E-23  | 0.838444708 | 0.456 | 0.395 | 2.76E-18  | 9 MTREX        |
| 1.10E-82  | 0.834983858 | 0.304 | 0.118 | 3.54E-78  | 9 INPP1        |
| 1.28E-31  | 0.832229809 | 0.327 | 0.201 | 4.10E-27  | 9 RNF144B      |
| 3.30E-94  | 0.831351877 | 0.334 | 0.122 | 1.06E-89  | 9 SLC9A9       |
| 3.43E-30  | 0.831105851 | 0.285 | 0.169 | 1.10E-25  | 9 RFX2         |
| 3.10E-47  | 0.826456098 | 0.504 | 0.351 | 9.96E-43  | 9 PPP1R13B     |
| 4.02E-37  | 0.825863305 | 0.469 | 0.321 | 1.29E-32  | 9 COL4A1       |
| 2.87E-93  | 0.824548383 | 0.36  | 0.142 | 9.21E-89  | 9 ARHGAP27P1-B |
| 1.27E-48  | 0.820567922 | 0.429 | 0.266 | 4.07E-44  | 9 RESF1        |
| 1.37E-99  | 0.818909565 | 0.355 | 0.133 | 4.41E-95  | 9 PARVB        |
| 2.97E-57  | 0.812076264 | 0.556 | 0.36  | 9.54E-53  | 9 DGKH         |
| 7.11E-20  | 0.810748934 | 0.28  | 0.19  | 2.28E-15  | 9 NR2F1-AS1    |
| 5.16E-49  | 0.810708612 | 0.431 | 0.268 | 1.66E-44  | 9 VOPPI        |
| 5.82E-35  | 0.808960187 | 0.332 | 0.208 | 1.87E-30  | 9 PPM1D        |
| 5.07E-55  | 0.808000821 | 0.67  | 0.552 | 1.63E-50  | 9 FOXN3        |
| 3.53E-107 | 0.807779584 | 0.258 | 0.073 | 1.13E-102 | 9 RASSF3       |
| 3.57E-31  | 0.805545745 | 0.378 | 0.26  | 1.15E-26  | 9 CDIN1        |
| 3.15E-77  | 0.804981722 | 0.282 | 0.106 | 1.01E-72  | 9 DDX60L       |
| 1.93E-36  | 0.800779741 | 0.395 | 0.256 | 6.21E-32  | 9 CHSY1        |
| 1.30E-184 | 0.798715636 | 0.254 | 0.046 | 4.18E-180 | 9 ARHGEF6      |
| 5.22E-53  | 0.795894654 | 0.423 | 0.261 | 1.68E-48  | 9 IKBKB        |
| 5.83E-54  | 0.79307558  | 0.399 | 0.223 | 1.87E-49  | 9 MDFIC        |
| 5.36E-39  | 0.792737689 | 0.537 | 0.425 | 1.72E-34  | 9 SMURF2       |
| 5.75E-63  | 0.790806016 | 0.364 | 0.182 | 1.85E-58  | 9 GAS6         |
| 4.17E-113 | 0.787598108 | 0.298 | 0.09  | 1.34E-108 | 9 DPYSL2       |
| 7.12E-49  | 0.787123934 | 0.388 | 0.23  | 2.29E-44  | 9 PXN          |
| 3.51E-52  | 0.784434974 | 0.283 | 0.134 | 1.13E-47  | 9 MYO1C        |
| 2.38E-40  | 0.779277443 | 0.251 | 0.12  | 7.64E-36  | 9 LTBP1        |
| 4.23E-49  | 0.775962751 | 0.718 | 0.66  | 1.36E-44  | 9 CCNY         |
| 4.51E-47  | 0.775743995 | 0.275 | 0.135 | 1.45E-42  | 9 APOLD1       |
| 1.89E-45  | 0.773816702 | 0.748 | 0.694 | 6.06E-41  | 9 AKAP13       |
| 9.23E-45  | 0.772877896 | 0.519 | 0.383 | 2.96E-40  | 9 FCHO2        |
| 5.87E-34  | 0.772707602 | 0.356 | 0.228 | 1.89E-29  | 9 ATP8B1       |
| 1.11E-43  | 0.768872564 | 0.569 | 0.452 | 3.57E-39  | 9 SENP7        |
| 9.36E-60  | 0.767193822 | 0.667 | 0.518 | 3.01E-55  | 9 ANKRD36      |
| 7.88E-33  | 0.764135885 | 0.425 | 0.292 | 2.53E-28  | 9 RANBP17      |
| 2.80E-107 | 0.763925721 | 0.883 | 0.787 | 8.99E-103 | 9 PTK2         |
| 7.07E-50  | 0.759318983 | 0.652 | 0.547 | 2.27E-45  | 9 NUTM2A-AS1   |
| 2.74E-23  | 0.756367559 | 0.471 | 0.36  | 8.81E-19  | 9 LMCD1-AS1    |
| 1.56E-84  | 0.755010944 | 0.255 | 0.084 | 5.02E-80  | 9 SAMD9L       |
| 5.02E-33  | 0.751955616 | 0.387 | 0.248 | 1.61E-28  | 9 KIF26B       |
| 1.12E-77  | 0.751656446 | 0.304 | 0.121 | 3.61E-73  | 9 GNB4         |

|           |             |       |       |          |                 |
|-----------|-------------|-------|-------|----------|-----------------|
| 3.86E-60  | 0.747379161 | 0.256 | 0.103 | 1.24E-55 | 9 AMYH02020865. |
| 1.24E-35  | 0.746929347 | 0.526 | 0.412 | 3.98E-31 | 9 CYTH1         |
| 5.36E-34  | 0.746752106 | 0.474 | 0.364 | 1.72E-29 | 9 ODF2L         |
| 4.21E-77  | 0.74504942  | 0.285 | 0.107 | 1.35E-72 | 9 AFAP1         |
| 6.35E-71  | 0.74499039  | 0.731 | 0.476 | 2.04E-66 | 9 FKBP5         |
| 1.94E-90  | 0.741397823 | 0.269 | 0.088 | 6.22E-86 | 9 ARRB1         |
| 2.01E-52  | 0.740634869 | 0.303 | 0.15  | 6.46E-48 | 9 IFNGR1        |
| 5.00E-59  | 0.739428516 | 0.286 | 0.126 | 1.61E-54 | 9 MIS18BP1      |
| 7.55E-61  | 0.735826359 | 0.342 | 0.166 | 2.43E-56 | 9 ECE1          |
| 3.32E-46  | 0.734812764 | 0.567 | 0.388 | 1.07E-41 | 9 ZDHC14        |
| 7.52E-37  | 0.733472712 | 0.506 | 0.396 | 2.42E-32 | 9 WASF2         |
| 3.73E-30  | 0.731685457 | 0.414 | 0.304 | 1.20E-25 | 9 MARK4         |
| 1.84E-51  | 0.731354005 | 0.613 | 0.459 | 5.90E-47 | 9 ANKRD36B      |
| 4.78E-38  | 0.731121061 | 0.381 | 0.246 | 1.54E-33 | 9 SKIL          |
| 4.84E-52  | 0.72982085  | 0.887 | 0.772 | 1.55E-47 | 9 ARL15         |
| 2.01E-62  | 0.729267285 | 0.672 | 0.506 | 6.47E-58 | 9 ANKRD36C      |
| 8.41E-34  | 0.728132752 | 0.259 | 0.136 | 2.70E-29 | 9 TCIM          |
| 3.35E-37  | 0.724780172 | 0.644 | 0.546 | 1.08E-32 | 9 PDLIM5        |
| 8.68E-59  | 0.723630008 | 0.339 | 0.167 | 2.79E-54 | 9 FZD4          |
| 1.24E-48  | 0.721101187 | 0.314 | 0.162 | 3.99E-44 | 9 HDGFL3        |
| 2.78E-64  | 0.718973038 | 0.342 | 0.159 | 8.93E-60 | 9 SH3KBP1       |
| 4.22E-74  | 0.718444333 | 0.79  | 0.724 | 1.35E-69 | 9 NKTR          |
| 3.92E-30  | 0.717337971 | 0.43  | 0.319 | 1.26E-25 | 9 ALG13         |
| 4.58E-40  | 0.7172756   | 0.291 | 0.153 | 1.47E-35 | 9 EEPD1         |
| 1.18E-100 | 0.716934531 | 0.275 | 0.086 | 3.80E-96 | 9 KIAA1841      |
| 3.38E-34  | 0.716137001 | 0.541 | 0.443 | 1.09E-29 | 9 TPTEP2-CSNK11 |
| 5.25E-41  | 0.715001115 | 0.392 | 0.239 | 1.68E-36 | 9 JAZF1         |
| 1.68E-39  | 0.714380377 | 0.331 | 0.192 | 5.39E-35 | 9 CD58          |
| 2.91E-49  | 0.713525573 | 0.641 | 0.542 | 9.34E-45 | 9 SMCHD1        |
| 1.63E-47  | 0.713167575 | 0.292 | 0.147 | 5.23E-43 | 9 SDCBP         |
| 6.42E-39  | 0.712203642 | 0.333 | 0.197 | 2.06E-34 | 9 IPO11         |
| 5.94E-46  | 0.711074135 | 0.379 | 0.221 | 1.91E-41 | 9 AC019257.8    |
| 1.43E-35  | 0.709698457 | 0.439 | 0.302 | 4.60E-31 | 9 SFMBT2        |
| 2.88E-63  | 0.706940523 | 0.399 | 0.207 | 9.25E-59 | 9 AP000295.1    |
| 4.03E-84  | 0.706812146 | 0.886 | 0.828 | 1.29E-79 | 9 MACF1         |
| 6.03E-56  | 0.706676814 | 0.815 | 0.738 | 1.94E-51 | 9 PICALM        |
| 2.39E-73  | 0.704379835 | 0.325 | 0.138 | 7.68E-69 | 9 HDAC7         |
| 5.19E-47  | 0.702076823 | 0.612 | 0.487 | 1.67E-42 | 9 ZFH3          |
| 6.92E-44  | 0.701395531 | 0.332 | 0.188 | 2.22E-39 | 9 CALCOCO2      |
| 4.31E-39  | 0.701344693 | 0.417 | 0.275 | 1.38E-34 | 9 ATXN3         |
| 6.07E-101 | 0.697535914 | 0.276 | 0.085 | 1.95E-96 | 9 STK10         |
| 1.50E-43  | 0.693872522 | 0.617 | 0.519 | 4.82E-39 | 9 NCKAP1        |
| 9.83E-35  | 0.691983266 | 0.29  | 0.167 | 3.16E-30 | 9 AL049629.2    |
| 1.17E-36  | 0.691554522 | 0.309 | 0.173 | 3.77E-32 | 9 AHR           |
| 3.69E-45  | 0.691060965 | 0.547 | 0.385 | 1.18E-40 | 9 SHROOM4       |
| 1.59E-25  | 0.687212834 | 0.306 | 0.192 | 5.11E-21 | 9 TSC22D3       |
| 1.62E-44  | 0.686450389 | 0.272 | 0.134 | 5.21E-40 | 9 AC025171.1    |
| 8.17E-18  | 0.684242668 | 0.472 | 0.421 | 2.62E-13 | 9 SPRED2        |
| 1.88E-26  | 0.683550075 | 0.42  | 0.316 | 6.03E-22 | 9 MGAT4A        |
| 2.95E-36  | 0.682111606 | 0.418 | 0.272 | 9.46E-32 | 9 STIM1         |
| 3.93E-21  | 0.679010654 | 0.281 | 0.186 | 1.26E-16 | 9 AC090517.4    |

|           |             |       |       |           |              |
|-----------|-------------|-------|-------|-----------|--------------|
| 2.19E-30  | 0.677158445 | 0.412 | 0.298 | 7.05E-26  | 9 TBC1D15    |
| 1.57E-50  | 0.673651588 | 0.28  | 0.133 | 5.04E-46  | 9 CD99       |
| 1.12E-30  | 0.672371473 | 0.537 | 0.423 | 3.61E-26  | 9 MYH9       |
| 1.40E-51  | 0.672159801 | 0.285 | 0.134 | 4.51E-47  | 9 SLC44A2    |
| 1.42E-28  | 0.667299236 | 0.352 | 0.24  | 4.56E-24  | 9 RPL31      |
| 2.78E-55  | 0.664996324 | 0.293 | 0.134 | 8.94E-51  | 9 NFKBIA     |
| 1.26E-37  | 0.66278436  | 0.662 | 0.551 | 4.05E-33  | 9 STARD13    |
| 6.60E-37  | 0.662310356 | 0.574 | 0.479 | 2.12E-32  | 9 ACAP2      |
| 2.00E-110 | 0.661683572 | 0.263 | 0.074 | 6.43E-106 | 9 CRIP2      |
| 3.41E-31  | 0.660802869 | 0.453 | 0.343 | 1.10E-26  | 9 TMOD3      |
| 4.51E-29  | 0.658567678 | 0.553 | 0.47  | 1.45E-24  | 9 PDS5B      |
| 3.48E-67  | 0.657328091 | 0.854 | 0.768 | 1.12E-62  | 9 AFF1       |
| 7.44E-40  | 0.655900002 | 0.689 | 0.624 | 2.39E-35  | 9 GSK3B      |
| 2.54E-66  | 0.650497856 | 0.304 | 0.126 | 8.16E-62  | 9 BX005040.4 |
| 1.98E-42  | 0.650379034 | 0.258 | 0.125 | 6.36E-38  | 9 TRIM56     |
| 1.64E-31  | 0.644419579 | 0.302 | 0.18  | 5.28E-27  | 9 SOX13      |
| 1.71E-35  | 0.643874933 | 0.589 | 0.467 | 5.49E-31  | 9 SSBP2      |
| 4.67E-59  | 0.64127323  | 0.873 | 0.82  | 1.50E-54  | 9 TBC1D5     |
| 7.78E-62  | 0.638347986 | 0.259 | 0.103 | 2.50E-57  | 9 DGKZ       |
| 4.59E-31  | 0.630983036 | 0.37  | 0.249 | 1.47E-26  | 9 NBPFL5     |
| 2.05E-28  | 0.629044757 | 0.398 | 0.287 | 6.60E-24  | 9 DENND6A    |
| 9.47E-24  | 0.625042991 | 0.52  | 0.444 | 3.04E-19  | 9 PHF14      |
| 8.09E-16  | 0.623071818 | 0.487 | 0.425 | 2.60E-11  | 9 ENTPD1-AS1 |
| 2.45E-26  | 0.621885323 | 0.821 | 0.806 | 7.87E-22  | 9 AC016831.6 |
| 3.77E-20  | 0.619011201 | 0.254 | 0.161 | 1.21E-15  | 9 RFTN1      |
| 4.32E-23  | 0.617025325 | 0.521 | 0.465 | 1.39E-18  | 9 UBR1       |
| 4.10E-30  | 0.60523641  | 0.366 | 0.246 | 1.32E-25  | 9 RHOA       |
| 7.60E-34  | 0.605225698 | 0.592 | 0.491 | 2.44E-29  | 9 GNB1       |
| 1.35E-28  | 0.605059839 | 0.318 | 0.199 | 4.34E-24  | 9 NIN        |
| 1.47E-28  | 0.604155193 | 0.77  | 0.742 | 4.73E-24  | 9 MBNL1      |
| 7.18E-45  | 0.599105355 | 0.659 | 0.543 | 2.30E-40  | 9 TJP1       |
| 3.34E-26  | 0.597810788 | 0.684 | 0.651 | 1.07E-21  | 9 ARHGEF12   |
| 1.32E-34  | 0.597551368 | 0.295 | 0.16  | 4.25E-30  | 9 ZEB2       |
| 3.23E-25  | 0.596971032 | 0.589 | 0.535 | 1.04E-20  | 9 ARHGEF7    |
| 2.04E-19  | 0.59418809  | 0.461 | 0.394 | 6.56E-15  | 9 PPP3CC     |
| 4.47E-20  | 0.590860906 | 0.346 | 0.253 | 1.43E-15  | 9 B4GALT1    |
| 5.09E-30  | 0.588678049 | 0.366 | 0.241 | 1.63E-25  | 9 CEP170     |
| 1.48E-21  | 0.587286671 | 0.258 | 0.164 | 4.74E-17  | 9 RAB8B      |
| 7.49E-36  | 0.586780247 | 0.318 | 0.184 | 2.41E-31  | 9 FGD6       |
| 1.50E-42  | 0.586419476 | 0.851 | 0.801 | 4.82E-38  | 9 MED13L     |
| 3.20E-16  | 0.58578133  | 0.257 | 0.176 | 1.03E-11  | 9 HERPUD1    |
| 5.75E-18  | 0.582665897 | 0.356 | 0.276 | 1.85E-13  | 9 STX12      |
| 7.60E-22  | 0.580744264 | 0.446 | 0.365 | 2.44E-17  | 9 CDC27      |
| 6.89E-20  | 0.579405072 | 0.592 | 0.559 | 2.21E-15  | 9 ELF2       |
| 8.98E-20  | 0.579396439 | 0.263 | 0.171 | 2.88E-15  | 9 CCDC88A    |
| 2.22E-26  | 0.578540483 | 0.685 | 0.644 | 7.12E-22  | 9 RAPGEF2    |
| 5.08E-56  | 0.57769229  | 0.816 | 0.696 | 1.63E-51  | 9 APBB2      |
| 9.46E-17  | 0.577349513 | 0.329 | 0.254 | 3.04E-12  | 9 SLC30A7    |
| 3.88E-18  | 0.574466702 | 0.36  | 0.28  | 1.24E-13  | 9 PRKD3      |
| 1.88E-51  | 0.574398626 | 0.256 | 0.112 | 6.03E-47  | 9 NOD1       |
| 2.09E-22  | 0.573874879 | 0.294 | 0.188 | 6.70E-18  | 9 PRKX       |

|            |             |       |       |             |            |
|------------|-------------|-------|-------|-------------|------------|
| 1.18E-13   | 0.569874242 | 0.301 | 0.22  | 3.78E-09    | 9 NR4A1    |
| 1.52E-15   | 0.569523124 | 0.413 | 0.35  | 4.87E-11    | 9 SUSD6    |
| 1.22E-47   | 0.568483323 | 0.745 | 0.628 | 3.91E-43    | 9 LRCH1    |
| 3.19E-28   | 0.567271974 | 0.354 | 0.234 | 1.03E-23    | 9 RGS12    |
| 3.60E-05   | 0.56687239  | 0.563 | 0.719 | 1           | 9 PRKCA    |
| 3.92E-21   | 0.56675378  | 0.74  | 0.733 | 1.26E-16    | 9 SMYD3    |
| 2.48E-19   | 0.566462095 | 0.444 | 0.372 | 7.97E-15    | 9 ITGB1    |
| 1.44E-20   | 0.563876943 | 0.378 | 0.284 | 4.62E-16    | 9 ZNF800   |
| 4.02E-35   | 0.563476424 | 0.682 | 0.625 | 1.29E-30    | 9 DDX5     |
| 0.00539841 | 0.561061112 | 0.262 | 0.251 | 1           | 9 KHDRBS3  |
| 1.44E-17   | 0.560823508 | 0.365 | 0.286 | 4.63E-13    | 9 KLHL2    |
| 2.82E-20   | 0.559118155 | 0.297 | 0.207 | 9.04E-16    | 9 BTBD3    |
| 3.11E-25   | 0.558907264 | 0.7   | 0.666 | 9.99E-21    | 9 RASA1    |
| 3.94E-50   | 0.55807332  | 0.855 | 0.797 | 1.27E-45    | 9 SBF2     |
| 1.72E-13   | 0.557767004 | 0.366 | 0.308 | 5.54E-09    | 9 ADAM17   |
| 5.02E-21   | 0.557123456 | 0.274 | 0.177 | 1.61E-16    | 9 SULF2    |
| 1.53E-19   | 0.553723377 | 0.529 | 0.475 | 4.92E-15    | 9 ADD1     |
| 3.99E-22   | 0.553522815 | 0.393 | 0.298 | 1.28E-17    | 9 CYFIP1   |
| 4.87E-12   | 0.550426502 | 0.251 | 0.177 | 1.57E-07    | 9 FOS      |
| 4.20E-18   | 0.549628474 | 0.416 | 0.336 | 1.35E-13    | 9 ZNF532   |
| 1.84E-34   | 0.547972043 | 0.315 | 0.18  | 5.92E-30    | 9 ROBO1    |
| 1.29E-16   | 0.547654062 | 0.663 | 0.634 | 4.13E-12    | 9 SORBS2   |
| 2.26E-29   | 0.546845391 | 0.648 | 0.588 | 7.26E-25    | 9 PPP1R12A |
| 3.98E-16   | 0.545785773 | 0.367 | 0.281 | 1.28E-11    | 9 PCDHGA1  |
| 8.03E-14   | 0.542485251 | 0.349 | 0.285 | 2.58E-09    | 9 FBXO25   |
| 1.02E-24   | 0.541867808 | 0.699 | 0.658 | 3.29E-20    | 9 MAP4     |
| 3.15E-12   | 0.540273468 | 0.536 | 0.497 | 1.01E-07    | 9 MLLT3    |
| 7.83E-31   | 0.538276964 | 0.753 | 0.719 | 2.52E-26    | 9 EXOC6B   |
| 5.64E-12   | 0.53531406  | 0.363 | 0.312 | 1.81E-07    | 9 CAPZA2   |
| 3.68E-14   | 0.534308104 | 0.438 | 0.363 | 1.18E-09    | 9 PPARG    |
| 2.05E-29   | 0.533190341 | 0.256 | 0.145 | 6.58E-25    | 9 TPM3     |
| 2.84E-08   | 0.532789881 | 0.416 | 0.402 | 0.00091071  | 9 LYST     |
| 2.26E-05   | 0.53238085  | 0.337 | 0.326 | 0.725477314 | 9 AGTPBP1  |
| 9.73E-12   | 0.532176591 | 0.444 | 0.379 | 3.12E-07    | 9 CACNA2D1 |
| 2.48E-14   | 0.53150773  | 0.281 | 0.206 | 7.95E-10    | 9 NCK1     |
| 1.19E-36   | 0.527788396 | 0.778 | 0.73  | 3.81E-32    | 9 STAG1    |
| 2.26E-10   | 0.524163508 | 0.541 | 0.541 | 7.25E-06    | 9 BBS9     |
| 2.84E-09   | 0.524029084 | 0.451 | 0.431 | 9.11E-05    | 9 FAM214A  |
| 2.59E-18   | 0.521111904 | 0.505 | 0.426 | 8.32E-14    | 9 SKAP2    |
| 1.70E-07   | 0.518968495 | 0.368 | 0.335 | 0.005451231 | 9 SPRED1   |
| 2.05E-20   | 0.517836019 | 0.338 | 0.24  | 6.58E-16    | 9 CEP85L   |
| 7.96E-30   | 0.514974985 | 0.267 | 0.149 | 2.56E-25    | 9 PIEZO1   |
| 5.06E-13   | 0.512293793 | 0.462 | 0.42  | 1.62E-08    | 9 TIAM2    |
| 1.49E-44   | 0.511278464 | 0.847 | 0.802 | 4.79E-40    | 9 TCF12    |
| 1.54E-10   | 0.511222006 | 0.448 | 0.405 | 4.95E-06    | 9 CAMK2D   |
| 6.23E-31   | 0.511181839 | 0.263 | 0.146 | 2.00E-26    | 9 STXBP1   |
| 2.22E-21   | 0.510954322 | 0.367 | 0.264 | 7.12E-17    | 9 MYO15B   |
| 3.29E-22   | 0.509488888 | 0.462 | 0.364 | 1.06E-17    | 9 SHOC1    |
| 2.53E-12   | 0.509447857 | 0.531 | 0.496 | 8.12E-08    | 9 HIPK3    |
| 3.32E-12   | 0.509435154 | 0.285 | 0.217 | 1.07E-07    | 9 ZNRF1    |
| 5.78E-28   | 0.508252952 | 0.299 | 0.178 | 1.86E-23    | 9 ZC3HAV1  |

|            |             |       |       |             |               |
|------------|-------------|-------|-------|-------------|---------------|
| 7.28E-13   | 0.50726598  | 0.296 | 0.231 | 2.34E-08    | 9 TSNAX-DISC1 |
| 7.69E-20   | 0.506827468 | 0.588 | 0.532 | 2.47E-15    | 9 SETX        |
| 6.69E-08   | 0.50619201  | 0.372 | 0.341 | 0.002147235 | 9 REEP3       |
| 2.38E-14   | 0.505794603 | 0.267 | 0.194 | 7.63E-10    | 9 TMEM87B     |
| 7.90E-10   | 0.503812105 | 0.331 | 0.274 | 2.54E-05    | 9 GAB2        |
| 6.88E-10   | 0.503531908 | 0.569 | 0.573 | 2.21E-05    | 9 UBE2D3      |
| 4.30E-13   | 0.503093917 | 0.31  | 0.239 | 1.38E-08    | 9 SLC38A2     |
| 5.00E-17   | 0.503043452 | 0.387 | 0.307 | 1.60E-12    | 9 DENND5A     |
| 9.67E-30   | 0.500690105 | 0.348 | 0.216 | 3.11E-25    | 9 ST3GAL1     |
| 8.37E-11   | 0.500265592 | 0.326 | 0.268 | 2.69E-06    | 9 RPH3AL      |
| 2.13E-13   | 0.499783899 | 0.389 | 0.319 | 6.85E-09    | 9 HPCAL1      |
| 0.00013208 | 0.498375824 | 0.315 | 0.293 | 1           | 9 CASC15      |
| 6.46E-12   | 0.495342252 | 0.259 | 0.184 | 2.07E-07    | 9 ZFPM2       |
| 1.68E-13   | 0.495143007 | 0.572 | 0.544 | 5.41E-09    | 9 XPR1        |
| 2.94E-17   | 0.493459491 | 0.301 | 0.216 | 9.44E-13    | 9 AGO4        |
| 6.47E-19   | 0.492431812 | 0.277 | 0.188 | 2.08E-14    | 9 MIDEAS      |
| 9.95E-24   | 0.491057425 | 0.318 | 0.204 | 3.19E-19    | 9 DCLK2       |
| 1.11E-17   | 0.488834836 | 0.3   | 0.209 | 3.56E-13    | 9 SNTB2       |
| 1.30E-08   | 0.48859786  | 0.346 | 0.293 | 0.000416273 | 9 PBX3        |
| 1.29E-16   | 0.487971004 | 0.56  | 0.521 | 4.13E-12    | 9 ROCK1       |
| 6.21E-17   | 0.486421812 | 0.572 | 0.533 | 1.99E-12    | 9 PTBP2       |
| 4.25E-10   | 0.481947682 | 0.404 | 0.359 | 1.37E-05    | 9 LUZP1       |
| 5.53E-10   | 0.4811621   | 0.534 | 0.53  | 1.78E-05    | 9 ATG7        |
| 8.21E-07   | 0.481071295 | 0.34  | 0.304 | 0.026374799 | 9 ANKH        |
| 0.00277867 | 0.481060712 | 0.446 | 0.442 | 1           | 9 THSD4       |
| 4.30E-23   | 0.480003095 | 0.292 | 0.181 | 1.38E-18    | 9 AP002518.2  |
| 3.03E-21   | 0.477869803 | 0.652 | 0.627 | 9.72E-17    | 9 COP1        |
| 6.98E-15   | 0.474094869 | 0.473 | 0.411 | 2.24E-10    | 9 PPP2R5A     |
| 1.77E-16   | 0.472755647 | 0.505 | 0.442 | 5.69E-12    | 9 IQGAP1      |
| 3.25E-09   | 0.471811765 | 0.275 | 0.224 | 0.000104445 | 9 PKIG        |
| 6.75E-11   | 0.470210607 | 0.364 | 0.307 | 2.17E-06    | 9 ATF7IP2     |
| 1.08E-15   | 0.469128132 | 0.543 | 0.519 | 3.48E-11    | 9 CEP350      |
| 2.34E-42   | 0.468455907 | 0.663 | 0.495 | 7.51E-38    | 9 HIP1        |
| 5.50E-08   | 0.467861089 | 0.525 | 0.534 | 0.001764858 | 9 DENND4C     |
| 2.56E-18   | 0.46494542  | 0.584 | 0.547 | 8.22E-14    | 9 KLC1        |
| 1.50E-33   | 0.464283108 | 0.883 | 0.881 | 4.81E-29    | 9 SYNE2       |
| 1.34E-08   | 0.463581005 | 0.401 | 0.369 | 0.000428887 | 9 GOLPH3      |
| 1.28E-13   | 0.462112194 | 0.366 | 0.3   | 4.10E-09    | 9 UPF3A       |
| 3.03E-12   | 0.461888041 | 0.492 | 0.45  | 9.72E-08    | 9 SPECC1L     |
| 4.42E-13   | 0.461239617 | 0.282 | 0.213 | 1.42E-08    | 9 CDC37       |
| 9.11E-15   | 0.461097695 | 0.281 | 0.205 | 2.93E-10    | 9 PTTG1IP     |
| 1.21E-12   | 0.458167537 | 0.502 | 0.464 | 3.88E-08    | 9 MAP4K5      |
| 1.62E-15   | 0.458086341 | 0.251 | 0.175 | 5.19E-11    | 9 DELE1       |
| 8.07E-27   | 0.457552525 | 0.782 | 0.765 | 2.59E-22    | 9 BAZ2B       |
| 2.00E-10   | 0.457215475 | 0.406 | 0.353 | 6.43E-06    | 9 CNTLN       |
| 3.62E-10   | 0.456528927 | 0.431 | 0.4   | 1.16E-05    | 9 EXOC1       |
| 5.43E-11   | 0.455878506 | 0.262 | 0.203 | 1.74E-06    | 9 KLF3        |
| 3.67E-09   | 0.45503955  | 0.271 | 0.218 | 0.000117827 | 9 EIF2AK2     |
| 9.72E-08   | 0.454521356 | 0.5   | 0.49  | 0.003121445 | 9 MAN2A1      |
| 5.86E-12   | 0.453436533 | 0.534 | 0.52  | 1.88E-07    | 9 MYCBP2      |
| 5.23E-09   | 0.452275883 | 0.53  | 0.516 | 0.000167952 | 9 GMDS        |

|            |             |       |       |             |              |
|------------|-------------|-------|-------|-------------|--------------|
| 1.19E-12   | 0.451043396 | 0.615 | 0.617 | 3.83E-08    | 9 SOS1       |
| 1.98E-11   | 0.450656381 | 0.377 | 0.323 | 6.37E-07    | 9 ARHGAP17   |
| 3.20E-12   | 0.450078602 | 0.296 | 0.224 | 1.03E-07    | 9 AC027097.2 |
| 8.29E-10   | 0.449829281 | 0.396 | 0.354 | 2.66E-05    | 9 ATF7-NPFF  |
| 0.00138212 | 0.449352459 | 0.352 | 0.356 | 1           | 9 RPRD1A     |
| 2.32E-06   | 0.447374278 | 0.366 | 0.346 | 0.074521884 | 9 PIK3CA     |
| 1.86E-20   | 0.447165513 | 0.614 | 0.538 | 5.98E-16    | 9 SVIL       |
| 4.98E-23   | 0.446160545 | 0.731 | 0.711 | 1.60E-18    | 9 ERC1       |
| 2.32E-16   | 0.444768253 | 0.596 | 0.564 | 7.45E-12    | 9 UVVAG      |
| 5.22E-05   | 0.444139802 | 0.373 | 0.359 | 1           | 9 NFKB1      |
| 2.57E-09   | 0.442537953 | 0.593 | 0.594 | 8.26E-05    | 9 ZNF407     |
| 1.64E-12   | 0.44138155  | 0.253 | 0.181 | 5.26E-08    | 9 AGPAT4     |
| 2.36E-12   | 0.440711305 | 0.448 | 0.395 | 7.58E-08    | 9 CAMSAP2    |
| 7.13E-07   | 0.440212996 | 0.32  | 0.281 | 0.022889453 | 9 KSR1       |
| 2.56E-16   | 0.43894057  | 0.651 | 0.614 | 8.23E-12    | 9 FER        |
| 4.52E-14   | 0.437608914 | 0.567 | 0.549 | 1.45E-09    | 9 FAM120B    |
| 4.96E-08   | 0.437281008 | 0.325 | 0.288 | 0.001593898 | 9 ARPC2      |
| 6.12E-09   | 0.436635431 | 0.459 | 0.435 | 0.000196712 | 9 AC068896.1 |
| 2.36E-18   | 0.436600234 | 0.64  | 0.612 | 7.57E-14    | 9 TBC1D22A   |
| 1.27E-07   | 0.436362856 | 0.393 | 0.369 | 0.004077802 | 9 PITPNB     |
| 4.38E-06   | 0.436098215 | 0.354 | 0.33  | 0.140540826 | 9 ACER3      |
| 4.93E-12   | 0.434489516 | 0.272 | 0.21  | 1.58E-07    | 9 RAB12      |
| 1.05E-15   | 0.433354596 | 0.3   | 0.215 | 3.37E-11    | 9 TPST2      |
| 7.02E-10   | 0.43234131  | 0.363 | 0.315 | 2.25E-05    | 9 SLC25A37   |
| 1.28E-10   | 0.431873373 | 0.525 | 0.509 | 4.11E-06    | 9 EPC1       |
| 2.92E-09   | 0.431745054 | 0.361 | 0.315 | 9.37E-05    | 9 SLK        |
| 1.02E-09   | 0.427602847 | 0.286 | 0.234 | 3.28E-05    | 9 SH3GLB1    |
| 1.17E-09   | 0.426530968 | 0.287 | 0.235 | 3.75E-05    | 9 YEATS2     |
| 4.15E-08   | 0.426429749 | 0.345 | 0.306 | 0.001331526 | 9 ASCC1      |
| 3.70E-13   | 0.426065092 | 0.309 | 0.229 | 1.19E-08    | 9 AC010894.2 |
| 2.90E-13   | 0.424585924 | 0.598 | 0.579 | 9.32E-09    | 9 EPS15      |
| 7.41E-08   | 0.424340667 | 0.459 | 0.438 | 0.002379204 | 9 RAP1A      |
| 6.73E-11   | 0.423943189 | 0.373 | 0.317 | 2.16E-06    | 9 RPS6KA3    |
| 1.01E-08   | 0.421281798 | 0.566 | 0.582 | 0.000324787 | 9 NUTM2B-AS1 |
| 2.37E-05   | 0.420706911 | 0.548 | 0.56  | 0.760947776 | 9 PPP3CA     |
| 0.00170351 | 0.416532295 | 0.381 | 0.395 | 1           | 9 MECP2      |
| 2.01E-19   | 0.410977934 | 0.749 | 0.698 | 6.44E-15    | 9 ZSWIM6     |
| 2.17E-07   | 0.410668558 | 0.445 | 0.424 | 0.006967416 | 9 ITM2B      |
| 0.00029086 | 0.410037603 | 0.482 | 0.506 | 1           | 9 PHF21A     |
| 9.75E-16   | 0.409357845 | 0.713 | 0.703 | 3.13E-11    | 9 PAN3       |
| 1.24E-19   | 0.407632152 | 0.72  | 0.681 | 3.99E-15    | 9 EIF4G3     |
| 0.00050088 | 0.407142741 | 0.253 | 0.229 | 1           | 9 RNF217     |
| 4.58E-08   | 0.404069968 | 0.37  | 0.335 | 0.001469575 | 9 DIP2A      |
| 9.54E-06   | 0.403829326 | 0.254 | 0.22  | 0.306270774 | 9 TBK1       |
| 2.66E-11   | 0.399476744 | 0.619 | 0.629 | 8.53E-07    | 9 ARID4B     |
| 3.84E-10   | 0.396460806 | 0.535 | 0.525 | 1.23E-05    | 9 RAB2A      |
| 3.00E-21   | 0.395469997 | 0.685 | 0.613 | 9.63E-17    | 9 LRRFIP1    |
| 3.41E-07   | 0.393001739 | 0.521 | 0.523 | 0.01095449  | 9 FBXW7      |
| 3.79E-24   | 0.392825321 | 0.396 | 0.279 | 1.22E-19    | 9 CDC14A     |
| 0.00075934 | 0.391323821 | 0.553 | 0.617 | 1           | 9 KLF12      |
| 6.49E-06   | 0.391225518 | 0.271 | 0.235 | 0.208537408 | 9 OSMR-AS1   |

|            |             |       |       |             |               |
|------------|-------------|-------|-------|-------------|---------------|
| 0.00024337 | 0.390816605 | 0.426 | 0.427 | 1           | 9 SPATA5      |
| 3.98E-08   | 0.389004021 | 0.278 | 0.229 | 0.001279328 | 9 RNF145      |
| 2.87E-05   | 0.38892555  | 0.334 | 0.305 | 0.922062246 | 9 ZNF462      |
| 0.00013118 | 0.388600651 | 0.331 | 0.302 | 1           | 9 FOSL2       |
| 1.41E-10   | 0.388309294 | 0.379 | 0.323 | 4.54E-06    | 9 RRBP1       |
| 4.10E-09   | 0.388175253 | 0.293 | 0.243 | 0.000131577 | 9 CRBN        |
| 3.84E-09   | 0.386664717 | 0.293 | 0.239 | 0.000123213 | 9 IRF2        |
| 5.27E-08   | 0.386085724 | 0.322 | 0.276 | 0.001692886 | 9 DAB2IP      |
| 3.53E-10   | 0.386024938 | 0.356 | 0.293 | 1.13E-05    | 9 CCND3       |
| 2.10E-05   | 0.384787638 | 0.348 | 0.32  | 0.674218175 | 9 GTDC1       |
| 0.00019204 | 0.384304582 | 0.313 | 0.301 | 1           | 9 MINDY3      |
| 9.82E-08   | 0.383555125 | 0.442 | 0.421 | 0.003153919 | 9 POLK        |
| 3.64E-06   | 0.382917453 | 0.5   | 0.504 | 0.116816488 | 9 FBXO11      |
| 5.53E-11   | 0.382146311 | 0.253 | 0.185 | 1.78E-06    | 9 NEDD9       |
| 0.00048356 | 0.381682586 | 0.281 | 0.259 | 1           | 9 SEM1        |
| 0.00550207 | 0.380767015 | 0.26  | 0.246 | 1           | 9 TDRP        |
| 5.60E-07   | 0.37894419  | 0.575 | 0.588 | 0.017994051 | 9 PCNX1       |
| 8.88E-34   | 0.377729489 | 0.436 | 0.271 | 2.85E-29    | 9 RCAN2       |
| 2.94E-06   | 0.375158033 | 0.441 | 0.435 | 0.094447942 | 9 ZNF280D     |
| 2.22E-08   | 0.374008627 | 0.315 | 0.267 | 0.000714254 | 9 MAP3K3      |
| 0.00116613 | 0.373480624 | 0.368 | 0.373 | 1           | 9 COPA        |
| 0.00701443 | 0.373446681 | 0.33  | 0.329 | 1           | 9 PITPNM2     |
| 1.23E-10   | 0.373195386 | 0.27  | 0.205 | 3.94E-06    | 9 ARPC4-TTLL3 |
| 3.22E-05   | 0.372245147 | 0.716 | 0.767 | 1           | 9 KIAA1217    |
| 1.42E-14   | 0.371304155 | 0.812 | 0.812 | 4.57E-10    | 9 PRH1        |
| 1.79E-05   | 0.371097415 | 0.418 | 0.415 | 0.574468952 | 9 PDCD6IP     |
| 1.01E-07   | 0.370407973 | 0.558 | 0.574 | 0.003244782 | 9 PHKB        |
| 5.27E-20   | 0.370310391 | 0.468 | 0.358 | 1.69E-15    | 9 STIM2       |
| 6.62E-14   | 0.369789957 | 0.72  | 0.716 | 2.13E-09    | 9 CDKAL1      |
| 2.82E-09   | 0.368670641 | 0.609 | 0.601 | 9.06E-05    | 9 CTBP2       |
| 1.91E-05   | 0.366068186 | 0.461 | 0.46  | 0.612198796 | 9 TMEM135     |
| 2.36E-05   | 0.364466931 | 0.36  | 0.34  | 0.758328337 | 9 RALY        |
| 0.00045659 | 0.364037732 | 0.289 | 0.272 | 1           | 9 HEATR5B     |
| 0.00024541 | 0.362404492 | 0.447 | 0.458 | 1           | 9 SUN1        |
| 3.79E-06   | 0.361968724 | 0.555 | 0.571 | 0.121878405 | 9 SDCCAG8     |
| 1.11E-09   | 0.36080153  | 0.514 | 0.494 | 3.57E-05    | 9 SMARCA2     |
| 0.00107961 | 0.359655309 | 0.269 | 0.249 | 1           | 9 SSH1        |
| 0.00014068 | 0.35877825  | 0.352 | 0.333 | 1           | 9 CRYBG3      |
| 0.00014752 | 0.358767665 | 0.476 | 0.496 | 1           | 9 CNOT2       |
| 6.63E-08   | 0.358698595 | 0.515 | 0.502 | 0.002128027 | 9 VPS13C      |
| 0.0005788  | 0.35774165  | 0.258 | 0.239 | 1           | 9 ACTR2       |
| 0.00297644 | 0.355032467 | 0.482 | 0.52  | 1           | 9 NEK7        |
| 1.12E-05   | 0.35469682  | 0.392 | 0.376 | 0.361000662 | 9 NCOR2       |
| 1.98E-09   | 0.354382971 | 0.616 | 0.623 | 6.37E-05    | 9 WAC         |
| 3.67E-11   | 0.354362336 | 0.674 | 0.678 | 1.18E-06    | 9 PCMI        |
| 5.63E-10   | 0.353909559 | 0.596 | 0.575 | 1.81E-05    | 9 NLK         |
| 5.83E-09   | 0.353709619 | 0.68  | 0.651 | 0.000187277 | 9 NFIB        |
| 1.64E-08   | 0.353649117 | 0.277 | 0.222 | 0.000526272 | 9 CCM2        |
| 5.67E-10   | 0.351690612 | 0.549 | 0.52  | 1.82E-05    | 9 ADAM10      |
| 0.00389926 | 0.351667822 | 0.385 | 0.391 | 1           | 9 TAF1        |
| 0.00017172 | 0.349913294 | 0.259 | 0.23  | 1           | 9 RALA        |



|            |             |       |       |             |              |
|------------|-------------|-------|-------|-------------|--------------|
| 4.26E-09   | 0.348478489 | 0.634 | 0.632 | 0.000136877 | 9 FTO        |
| 1.27E-17   | 0.346792803 | 0.748 | 0.731 | 4.06E-13    | 9 DOCK1      |
| 1.08E-19   | 0.346365008 | 0.399 | 0.283 | 3.48E-15    | 9 MID1       |
| 0.00011529 | 0.346215615 | 0.286 | 0.251 | 1           | 9 ITPKB      |
| 5.06E-08   | 0.345759126 | 0.608 | 0.625 | 0.001624114 | 9 HERC4      |
| 2.31E-05   | 0.345297348 | 0.458 | 0.465 | 0.743425277 | 9 SMC5       |
| 6.46E-06   | 0.344236721 | 0.284 | 0.25  | 0.207440964 | 9 RBM17      |
| 0.00010914 | 0.34373703  | 0.392 | 0.388 | 1           | 9 TMEM165    |
| 0.00014605 | 0.342012657 | 0.404 | 0.406 | 1           | 9 SEPTIN7    |
| 3.33E-05   | 0.341016138 | 0.326 | 0.303 | 1           | 9 PAK2       |
| 4.06E-09   | 0.340658531 | 0.644 | 0.66  | 0.000130529 | 9 KMT2E      |
| 2.36E-07   | 0.339196709 | 0.576 | 0.566 | 0.007566195 | 9 PAM        |
| 0.00838764 | 0.337946412 | 0.441 | 0.474 | 1           | 9 VPS54      |
| 2.80E-06   | 0.337916806 | 0.485 | 0.486 | 0.089835238 | 9 CAST       |
| 0.00011557 | 0.337191928 | 0.295 | 0.274 | 1           | 9 CDC42      |
| 4.65E-11   | 0.336793123 | 0.717 | 0.719 | 1.49E-06    | 9 MKLN1      |
| 0.00067438 | 0.33631053  | 0.413 | 0.415 | 1           | 9 SPTAN1     |
| 0.00018781 | 0.333410797 | 0.361 | 0.351 | 1           | 9 AC078927.1 |
| 4.73E-20   | 0.333333571 | 0.413 | 0.296 | 1.52E-15    | 9 PHACTR1    |
| 0.00099286 | 0.332635447 | 0.43  | 0.439 | 1           | 9 LRCH3      |
| 0.00091986 | 0.331689802 | 0.453 | 0.469 | 1           | 9 MAP2K5     |
| 0.00906029 | 0.331533295 | 0.37  | 0.373 | 1           | 9 B4GALT5    |
| 2.65E-09   | 0.331442081 | 0.388 | 0.323 | 8.51E-05    | 9 ATP11A     |
| 4.96E-07   | 0.331032776 | 0.3   | 0.256 | 0.015944085 | 9 ELOVL5     |
| 0.00010649 | 0.329269391 | 0.287 | 0.264 | 1           | 9 AC009554.1 |
| 3.40E-07   | 0.328317232 | 0.567 | 0.585 | 0.010905954 | 9 SETD5      |
| 0.00017516 | 0.327339278 | 0.346 | 0.323 | 1           | 9 RSU1       |
| 2.09E-08   | 0.327301287 | 0.358 | 0.496 | 0.000670742 | 9 NDRG1      |
| 0.00105621 | 0.327005258 | 0.412 | 0.406 | 1           | 9 PHACTR2    |
| 4.00E-05   | 0.325827323 | 0.348 | 0.323 | 1           | 9 CTIF       |
| 0.00370389 | 0.324659838 | 0.402 | 0.412 | 1           | 9 APPBP2     |
| 2.37E-11   | 0.322966395 | 0.641 | 0.618 | 7.61E-07    | 9 SPAG9      |
| 0.00956883 | 0.32084811  | 0.365 | 0.378 | 1           | 9 FAR1       |
| 0.00434939 | 0.319794624 | 0.288 | 0.276 | 1           | 9 EXT2       |
| 0.00782802 | 0.319644732 | 0.488 | 0.522 | 1           | 9 UNC13B     |
| 0.0051899  | 0.319054038 | 0.253 | 0.24  | 1           | 9 MTM1       |
| 0.00039214 | 0.318904045 | 0.288 | 0.257 | 1           | 9 MTHFD1L    |
| 0.0052009  | 0.318533589 | 0.26  | 0.252 | 1           | 9 LINC01881  |
| 2.94E-08   | 0.318028189 | 0.579 | 0.58  | 0.000944354 | 9 XRN1       |
| 0.00876815 | 0.317980975 | 0.439 | 0.476 | 1           | 9 SNX13      |
| 0.00404303 | 0.317587261 | 0.356 | 0.367 | 1           | 9 RARS2      |
| 0.00483578 | 0.317362588 | 0.423 | 0.445 | 1           | 9 WASHC4     |
| 2.07E-07   | 0.316758903 | 0.68  | 0.699 | 0.006646643 | 9 NCOA1      |
| 0.00078556 | 0.31669037  | 0.313 | 0.302 | 1           | 9 ANAPC5     |
| 2.27E-07   | 0.31633074  | 0.416 | 0.383 | 0.007302981 | 9 JAK2       |
| 5.46E-05   | 0.315824628 | 0.472 | 0.482 | 1           | 9 MARCHF7    |
| 0.00113441 | 0.315392676 | 0.461 | 0.476 | 1           | 9 DMTF1      |
| 0.00501627 | 0.315331419 | 0.422 | 0.444 | 1           | 9 FUS        |
| 0.00069744 | 0.312537699 | 0.531 | 0.548 | 1           | 9 CMIP       |
| 0.00026605 | 0.311314016 | 0.456 | 0.467 | 1           | 9 SEC24B     |
| 3.52E-06   | 0.311178305 | 0.665 | 0.691 | 0.113200094 | 9 FAM172A    |

|            |             |       |       |             |               |
|------------|-------------|-------|-------|-------------|---------------|
| 0.00794637 | 0.309449046 | 0.311 | 0.305 | 1           | 9 BRWD3       |
| 0.00043768 | 0.308635318 | 0.621 | 0.66  | 1           | 9 COMMD10     |
| 0.00335311 | 0.307580835 | 0.435 | 0.456 | 1           | 9 TAF15       |
| 4.97E-10   | 0.307553985 | 0.701 | 0.708 | 1.60E-05    | 9 AFDN        |
| 1.00E-06   | 0.307457869 | 0.492 | 0.469 | 0.032135504 | 9 CDC42BPB    |
| 0.00417888 | 0.306266616 | 0.489 | 0.51  | 1           | 9 PHACTR4     |
| 0.00696621 | 0.30368818  | 0.254 | 0.242 | 1           | 9 DCP2        |
| 0.00831515 | 0.30232423  | 0.301 | 0.298 | 1           | 9 VPS36       |
| 0.00650628 | 0.301506083 | 0.317 | 0.303 | 1           | 9 AC092683.1  |
| 1.75E-11   | 0.300623535 | 0.49  | 0.423 | 5.63E-07    | 9 BICD1       |
| 0.00886626 | 0.298578648 | 0.344 | 0.35  | 1           | 9 ATF2        |
| 8.27E-11   | 0.297628143 | 0.703 | 0.688 | 2.66E-06    | 9 TRIO        |
| 0.00014762 | 0.292709324 | 0.462 | 0.478 | 1           | 9 HNRNPA3     |
| 0.00212065 | 0.292677331 | 0.289 | 0.271 | 1           | 9 RAPH1       |
| 2.63E-49   | 0.290143729 | 1     | 0.999 | 8.45E-45    | 9 FP671120.7  |
| 9.02E-05   | 0.290091833 | 0.321 | 0.297 | 1           | 9 DYNC1H1     |
| 0.00517862 | 0.288720624 | 0.467 | 0.496 | 1           | 9 RAB3GAP1    |
| 4.66E-07   | 0.287677441 | 0.701 | 0.728 | 0.014979459 | 9 NIPBL       |
| 0.00866684 | 0.286002824 | 0.417 | 0.435 | 1           | 9 VEZT        |
| 5.11E-11   | 0.285555104 | 0.708 | 0.69  | 1.64E-06    | 9 NUMB        |
| 0.00052687 | 0.282622072 | 0.277 | 0.254 | 1           | 9 SIN3B       |
| 2.54E-06   | 0.282100493 | 0.292 | 0.248 | 0.081447598 | 9 FAM111A     |
| 8.09E-08   | 0.281155475 | 0.634 | 0.603 | 0.002597106 | 9 FOXO1       |
| 0.00250501 | 0.278773535 | 0.506 | 0.518 | 1           | 9 ELF1        |
| 0.00087442 | 0.278703475 | 0.428 | 0.443 | 1           | 9 ZNF207      |
| 5.07E-25   | 0.278062303 | 0.998 | 0.998 | 1.63E-20    | 9 HFM1        |
| 0.00683201 | 0.269954951 | 0.472 | 0.495 | 1           | 9 PPP2R2A     |
| 0.00271892 | 0.268581052 | 0.293 | 0.278 | 1           | 9 AAMDC       |
| 9.03E-07   | 0.268548908 | 0.61  | 0.624 | 0.028989711 | 9 TSPAN9      |
| 0.00246584 | 0.267348339 | 0.401 | 0.407 | 1           | 9 EHMT1       |
| 2.77E-10   | 0.263295618 | 0.505 | 0.436 | 8.91E-06    | 9 PLCL2       |
| 0.00545217 | 0.262089912 | 0.356 | 0.353 | 1           | 9 PCBP1-AS1   |
| 5.87E-08   | 0.262042433 | 0.752 | 0.757 | 0.001884722 | 9 BIRC6       |
| 7.14E-06   | 0.259654573 | 0.72  | 0.742 | 0.229169578 | 9 SPIDR       |
| 0.00787259 | 0.25773814  | 0.52  | 0.544 | 1           | 9 STAT3       |
| 0.00377981 | 0.257501637 | 0.578 | 0.616 | 1           | 9 TRIP12      |
| 3.72E-49   | 0.250608382 | 0.846 | 0.687 | 1.19E-44    | 9 CADPS2      |
| 0          | 3.273589399 | 0.694 | 0.08  | 0           | 10 LINC00621  |
| 0          | 3.1093474   | 0.57  | 0.111 | 0           | 10 DCC        |
| 0          | 2.992179762 | 0.855 | 0.145 | 0           | 10 BX571818.1 |
| 0          | 2.876066451 | 0.724 | 0.187 | 0           | 10 DLGAP1     |
| 0          | 2.665775239 | 0.885 | 0.356 | 0           | 10 ITGB8      |
| 0          | 2.63300218  | 0.561 | 0.131 | 0           | 10 CLSTN2     |
| 0          | 2.602034731 | 0.697 | 0.146 | 0           | 10 CREB5      |
| 0          | 2.344321981 | 0.544 | 0.105 | 0           | 10 CRYAB      |
| 0          | 2.331077855 | 0.74  | 0.201 | 0           | 10 TMEM178B   |
| 0          | 2.21191139  | 0.506 | 0.051 | 0           | 10 VCAM1      |
| 0          | 2.182907938 | 0.735 | 0.088 | 0           | 10 RHEX       |
| 0          | 2.172482252 | 0.851 | 0.27  | 0           | 10 UGT2B7     |
| 0          | 2.139987735 | 0.707 | 0.095 | 0           | 10 ALPK2      |
| 0          | 2.094162829 | 0.467 | 0.059 | 0           | 10 MEG3       |

|           |             |       |       |           |               |
|-----------|-------------|-------|-------|-----------|---------------|
| 0         | 1.998338816 | 0.72  | 0.242 | 0         | 10 TPM1       |
| 0         | 1.896506572 | 0.792 | 0.247 | 0         | 10 PRUNE2     |
| 0         | 1.860109455 | 0.744 | 0.24  | 0         | 10 TNIK       |
| 7.34E-105 | 1.852492234 | 0.431 | 0.176 | 2.36E-100 | 10 ROBO2      |
| 0         | 1.801347793 | 0.482 | 0.077 | 0         | 10 CDH6       |
| 6.08E-308 | 1.800823831 | 0.852 | 0.362 | 1.95E-303 | 10 BNC2       |
| 2.56E-70  | 1.789890312 | 0.409 | 0.204 | 8.24E-66  | 10 ACSM3      |
| 1.94E-241 | 1.782407738 | 0.696 | 0.292 | 6.23E-237 | 10 UGCG       |
| 0         | 1.759470036 | 0.491 | 0.08  | 0         | 10 PRICKLE1   |
| 0         | 1.719603838 | 0.553 | 0.12  | 0         | 10 AKAP12     |
| 0         | 1.713041478 | 0.594 | 0.129 | 0         | 10 EPHA7      |
| 3.25E-245 | 1.698881124 | 0.822 | 0.412 | 1.05E-240 | 10 GPC6       |
| 1.03E-248 | 1.688400073 | 0.703 | 0.258 | 3.31E-244 | 10 SEMA5A     |
| 2.31E-302 | 1.654529457 | 0.695 | 0.214 | 7.41E-298 | 10 CLIC4      |
| 0         | 1.626946161 | 0.446 | 0.061 | 0         | 10 FAM135B    |
| 1.12E-299 | 1.62354557  | 0.855 | 0.359 | 3.60E-295 | 10 PTPRD      |
| 2.34E-215 | 1.615736099 | 0.847 | 0.527 | 7.51E-211 | 10 PPFIBP1    |
| 0         | 1.605011768 | 0.533 | 0.052 | 0         | 10 APBB1IP    |
| 9.99E-115 | 1.603023476 | 0.555 | 0.282 | 3.21E-110 | 10 CASC15     |
| 0         | 1.600700754 | 0.642 | 0.171 | 0         | 10 FOXP2      |
| 4.71E-238 | 1.588206469 | 0.824 | 0.402 | 1.51E-233 | 10 LINC01320  |
| 2.48E-204 | 1.562071619 | 0.866 | 0.499 | 7.96E-200 | 10 SDK1       |
| 1.33E-232 | 1.5583647   | 0.746 | 0.305 | 4.27E-228 | 10 NRP1       |
| 4.46E-289 | 1.545280721 | 0.387 | 0.066 | 1.43E-284 | 10 AC113386.1 |
| 0         | 1.543801726 | 0.58  | 0.103 | 0         | 10 AC018467.1 |
| 8.43E-158 | 1.538284561 | 0.407 | 0.12  | 2.71E-153 | 10 SLC9A9     |
| 2.18E-219 | 1.517168149 | 0.344 | 0.067 | 7.00E-215 | 10 KCNQ3      |
| 9.21E-233 | 1.511871631 | 0.66  | 0.25  | 2.96E-228 | 10 LINC02615  |
| 6.25E-277 | 1.496720219 | 0.338 | 0.052 | 2.01E-272 | 10 FSTL3      |
| 0         | 1.479924123 | 0.731 | 0.195 | 0         | 10 AL589669.1 |
| 1.00E-224 | 1.474746915 | 0.561 | 0.157 | 3.21E-220 | 10 GDA        |
| 0         | 1.454960761 | 0.657 | 0.156 | 0         | 10 CDH2       |
| 1.15E-74  | 1.43281425  | 0.585 | 0.37  | 3.69E-70  | 10 SOD2       |
| 1.22E-253 | 1.430314538 | 0.812 | 0.313 | 3.90E-249 | 10 SLC2A9     |
| 4.81E-209 | 1.406640271 | 0.856 | 0.555 | 1.55E-204 | 10 VMP1       |
| 0         | 1.405347404 | 0.37  | 0.023 | 0         | 10 RHPN2P1    |
| 8.73E-124 | 1.39808431  | 0.553 | 0.249 | 2.80E-119 | 10 NCEH1      |
| 1.43E-155 | 1.391959916 | 0.662 | 0.308 | 4.59E-151 | 10 MACC1      |
| 1.30E-243 | 1.390732349 | 0.506 | 0.133 | 4.17E-239 | 10 TNFSF10    |
| 2.58E-180 | 1.387212927 | 0.629 | 0.262 | 8.28E-176 | 10 LPIN2      |
| 1.67E-225 | 1.371538381 | 0.846 | 0.359 | 5.36E-221 | 10 LRP2       |
| 0         | 1.36740426  | 0.511 | 0.087 | 0         | 10 DOCK11     |
| 1.02E-182 | 1.361239648 | 0.751 | 0.386 | 3.29E-178 | 10 STOX2      |
| 8.76E-168 | 1.358233712 | 0.666 | 0.314 | 2.81E-163 | 10 KLF6       |
| 3.71E-250 | 1.347169637 | 0.559 | 0.159 | 1.19E-245 | 10 DTNA       |
| 6.69E-203 | 1.337971332 | 0.778 | 0.359 | 2.15E-198 | 10 ARHGAP26   |
| 1.35E-163 | 1.326795058 | 0.72  | 0.361 | 4.33E-159 | 10 SAMD4A     |
| 5.92E-166 | 1.310207165 | 0.966 | 0.826 | 1.90E-161 | 10 BICC1      |
| 3.16E-189 | 1.307791021 | 0.638 | 0.252 | 1.02E-184 | 10 FAM189A1   |
| 1.19E-109 | 1.290176129 | 0.562 | 0.263 | 3.82E-105 | 10 NRG1       |
| 1.55E-132 | 1.273822292 | 0.525 | 0.212 | 4.97E-128 | 10 NFKBIZ     |

|           |             |       |       |           |               |
|-----------|-------------|-------|-------|-----------|---------------|
| 0         | 1.271715403 | 0.545 | 0.095 | 0         | 10 ADGRG6     |
| 0         | 1.266789085 | 0.407 | 0.051 | 0         | 10 COL23A1    |
| 2.19E-232 | 1.26360991  | 0.503 | 0.13  | 7.03E-228 | 10 GBA3       |
| 8.29E-232 | 1.261814979 | 0.541 | 0.151 | 2.66E-227 | 10 AL136234.1 |
| 5.33E-138 | 1.258944518 | 0.576 | 0.237 | 1.71E-133 | 10 AC012593.1 |
| 0         | 1.25832818  | 0.473 | 0.086 | 0         | 10 SULT1C4    |
| 3.12E-165 | 1.246892089 | 0.307 | 0.068 | 1.00E-160 | 10 DCLK1      |
| 0         | 1.246303327 | 0.286 | 0.028 | 0         | 10 AL117190.1 |
| 7.51E-233 | 1.243949916 | 0.658 | 0.219 | 2.41E-228 | 10 NRG3       |
| 8.58E-157 | 1.238554884 | 0.549 | 0.206 | 2.75E-152 | 10 ANKRD33B   |
| 0         | 1.225461738 | 0.509 | 0.076 | 0         | 10 MSC-AS1    |
| 0         | 1.22486122  | 0.297 | 0.033 | 0         | 10 MEG8       |
| 2.28E-189 | 1.224038812 | 0.937 | 0.835 | 7.34E-185 | 10 PARD3      |
| 1.20E-231 | 1.223441174 | 0.667 | 0.224 | 3.86E-227 | 10 ARHGAP42   |
| 2.92E-126 | 1.221176049 | 0.656 | 0.338 | 9.36E-122 | 10 RETREG1    |
| 6.68E-266 | 1.213233753 | 0.689 | 0.217 | 2.14E-261 | 10 PAPLN      |
| 1.12E-193 | 1.203072463 | 0.465 | 0.13  | 3.60E-189 | 10 PROM1      |
| 6.94E-179 | 1.195612767 | 0.887 | 0.635 | 2.23E-174 | 10 TTC28      |
| 7.39E-146 | 1.188764046 | 0.854 | 0.519 | 2.37E-141 | 10 NCKAP5     |
| 1.41E-124 | 1.18870789  | 0.644 | 0.32  | 4.54E-120 | 10 MET        |
| 3.92E-128 | 1.176160312 | 0.894 | 0.683 | 1.26E-123 | 10 AGBL4      |
| 5.22E-179 | 1.167440073 | 0.529 | 0.178 | 1.68E-174 | 10 NEDD4      |
| 8.23E-163 | 1.163531008 | 0.716 | 0.354 | 2.64E-158 | 10 DGKH       |
| 2.40E-120 | 1.160874669 | 0.747 | 0.479 | 7.70E-116 | 10 MICAL3     |
| 1.24E-149 | 1.156606299 | 0.713 | 0.366 | 3.98E-145 | 10 LRRK2      |
| 7.24E-154 | 1.15560126  | 0.419 | 0.122 | 2.33E-149 | 10 ELF3       |
| 2.52E-129 | 1.152736241 | 0.888 | 0.664 | 8.08E-125 | 10 NHS        |
| 6.50E-196 | 1.152222814 | 0.99  | 0.825 | 2.09E-191 | 10 PTH2R      |
| 2.37E-206 | 1.142907544 | 0.665 | 0.249 | 7.61E-202 | 10 LSP1P4     |
| 2.82E-292 | 1.135466794 | 0.632 | 0.157 | 9.07E-288 | 10 GLIS1      |
| 4.78E-308 | 1.133914654 | 0.302 | 0.037 | 1.53E-303 | 10 HHLA2      |
| 3.14E-211 | 1.119509597 | 0.54  | 0.154 | 1.01E-206 | 10 AGMO       |
| 0         | 1.116309803 | 0.343 | 0.031 | 0         | 10 IL32       |
| 8.13E-195 | 1.100501855 | 0.672 | 0.237 | 2.61E-190 | 10 RHOBTB1    |
| 0         | 1.09510589  | 0.438 | 0.074 | 0         | 10 PVT1       |
| 4.36E-259 | 1.094587122 | 0.395 | 0.074 | 1.40E-254 | 10 AC005699.1 |
| 0         | 1.094281927 | 0.47  | 0.078 | 0         | 10 TTLL7      |
| 1.65E-207 | 1.091244357 | 0.669 | 0.248 | 5.31E-203 | 10 LSP1P5     |
| 8.31E-133 | 1.084856855 | 0.714 | 0.404 | 2.67E-128 | 10 SPATS2L    |
| 9.39E-195 | 1.081085603 | 0.543 | 0.175 | 3.02E-190 | 10 MPP6       |
| 6.48E-204 | 1.076120878 | 0.666 | 0.235 | 2.08E-199 | 10 COL27A1    |
| 7.65E-125 | 1.075100233 | 0.55  | 0.239 | 2.46E-120 | 10 MYLK       |
| 8.81E-164 | 1.074342765 | 0.686 | 0.309 | 2.83E-159 | 10 ATP11A     |
| 6.29E-109 | 1.070654381 | 0.336 | 0.105 | 2.02E-104 | 10 KCTD16     |
| 0         | 1.068457467 | 0.37  | 0.041 | 0         | 10 MYO3A      |
| 9.11E-219 | 1.059642462 | 0.995 | 0.873 | 2.93E-214 | 10 PKHD1      |
| 4.54E-246 | 1.059309736 | 0.642 | 0.196 | 1.46E-241 | 10 CD200      |
| 8.22E-50  | 1.059217583 | 0.656 | 0.478 | 2.64E-45  | 10 FMNL2      |
| 3.51E-98  | 1.054837101 | 0.699 | 0.442 | 1.13E-93  | 10 PLEKHA1    |
| 6.63E-202 | 1.054217791 | 0.559 | 0.161 | 2.13E-197 | 10 ANPEP      |
| 1.79E-111 | 1.050556571 | 0.481 | 0.196 | 5.74E-107 | 10 TNFRSF21   |

|           |             |       |       |           |               |
|-----------|-------------|-------|-------|-----------|---------------|
| 0         | 1.049899683 | 0.369 | 0.052 | 0         | 10 ABCC3      |
| 4.39E-110 | 1.049749199 | 0.594 | 0.286 | 1.41E-105 | 10 ZNF385B    |
| 1.40E-124 | 1.048121317 | 0.799 | 0.538 | 4.50E-120 | 10 BCL2       |
| 1.72E-183 | 1.046953699 | 0.59  | 0.206 | 5.52E-179 | 10 SLC22A2    |
| 6.60E-163 | 1.043371235 | 0.644 | 0.262 | 2.12E-158 | 10 AC098650.1 |
| 4.46E-239 | 1.038809573 | 0.38  | 0.073 | 1.43E-234 | 10 LINC01428  |
| 1.99E-184 | 1.038469446 | 0.67  | 0.255 | 6.38E-180 | 10 CDHR3      |
| 3.18E-174 | 1.038468662 | 0.535 | 0.174 | 1.02E-169 | 10 MMADHC-DT  |
| 6.62E-122 | 1.024523742 | 0.467 | 0.177 | 2.13E-117 | 10 MB21D2     |
| 7.55E-137 | 1.021145202 | 0.85  | 0.597 | 2.42E-132 | 10 CCDC198    |
| 1.75E-141 | 1.017629652 | 0.868 | 0.642 | 5.61E-137 | 10 NFIB       |
| 3.34E-246 | 1.017171643 | 0.954 | 0.372 | 1.07E-241 | 10 ACSM2A     |
| 5.80E-237 | 1.012669061 | 0.451 | 0.103 | 1.86E-232 | 10 AR         |
| 4.32E-128 | 1.010604055 | 0.798 | 0.507 | 1.39E-123 | 10 NFIA       |
| 1.17E-106 | 1.009889833 | 0.814 | 0.683 | 3.77E-102 | 10 TRIO       |
| 1.28E-140 | 1.003172258 | 0.26  | 0.055 | 4.10E-136 | 10 PGGHG      |
| 1.34E-87  | 1.00074012  | 0.434 | 0.182 | 4.29E-83  | 10 ZNF804B    |
| 2.25E-103 | 0.998606877 | 0.713 | 0.42  | 7.22E-99  | 10 COL4A2     |
| 3.45E-129 | 0.996360934 | 0.848 | 0.626 | 1.11E-124 | 10 SORBS2     |
| 3.25E-90  | 0.994062041 | 0.594 | 0.316 | 1.05E-85  | 10 COL4A1     |
| 5.07E-75  | 0.98937705  | 0.545 | 0.297 | 1.63E-70  | 10 ABCB1      |
| 0         | 0.981470694 | 0.366 | 0.02  | 0         | 10 HAVCR1     |
| 9.86E-78  | 0.978644205 | 0.467 | 0.229 | 3.17E-73  | 10 UBC        |
| 1.01E-72  | 0.972670527 | 0.331 | 0.133 | 3.24E-68  | 10 NFKBIA     |
| 1.61E-298 | 0.969407509 | 0.345 | 0.049 | 5.19E-294 | 10 TNFAIP2    |
| 7.48E-62  | 0.968542573 | 0.586 | 0.374 | 2.40E-57  | 10 MYO5B      |
| 3.54E-113 | 0.958937168 | 0.803 | 0.564 | 1.14E-108 | 10 CNKSR3     |
| 0         | 0.958735801 | 0.46  | 0.08  | 0         | 10 UGT2A3     |
| 5.01E-108 | 0.958434535 | 0.538 | 0.242 | 1.61E-103 | 10 KIF26B     |
| 2.13E-78  | 0.957766858 | 0.672 | 0.446 | 6.83E-74  | 10 AL358113.1 |
| 2.01E-199 | 0.95672485  | 0.764 | 0.279 | 6.45E-195 | 10 SLC17A1    |
| 5.05E-83  | 0.951150595 | 0.649 | 0.416 | 1.62E-78  | 10 MAP3K1     |
| 2.18E-94  | 0.951132356 | 0.338 | 0.116 | 7.00E-90  | 10 UNC5D      |
| 3.47E-148 | 0.948856429 | 0.642 | 0.256 | 1.11E-143 | 10 RASSF4     |
| 1.38E-120 | 0.94674452  | 0.596 | 0.256 | 4.43E-116 | 10 AC008554.1 |
| 1.72E-117 | 0.944422437 | 0.413 | 0.145 | 5.52E-113 | 10 GPC4       |
| 8.47E-117 | 0.941736604 | 0.768 | 0.437 | 2.72E-112 | 10 GALNT14    |
| 9.13E-93  | 0.93467006  | 0.443 | 0.185 | 2.93E-88  | 10 ZFP36      |
| 4.49E-136 | 0.934035166 | 0.76  | 0.381 | 1.44E-131 | 10 CNTN4      |
| 3.39E-121 | 0.933388441 | 0.478 | 0.176 | 1.09E-116 | 10 ABI3BP     |
| 3.33E-157 | 0.929098505 | 0.354 | 0.087 | 1.07E-152 | 10 KCNT2      |
| 1.13E-280 | 0.928410758 | 0.347 | 0.052 | 3.64E-276 | 10 TLL1       |
| 9.54E-208 | 0.928056661 | 0.531 | 0.15  | 3.06E-203 | 10 ZEB2       |
| 0         | 0.92786917  | 0.297 | 0.03  | 0         | 10 LINC02471  |
| 9.46E-97  | 0.924097705 | 0.716 | 0.487 | 3.04E-92  | 10 UBE2D2     |
| 8.70E-76  | 0.914235012 | 0.715 | 0.502 | 2.79E-71  | 10 KIFC3      |
| 1.12E-233 | 0.911516359 | 0.49  | 0.12  | 3.60E-229 | 10 HNF4G      |
| 0         | 0.91081956  | 0.446 | 0.073 | 0         | 10 SEL1L3     |
| 5.71E-109 | 0.91081093  | 0.862 | 0.618 | 1.83E-104 | 10 LINC02532  |
| 5.09E-225 | 0.910683112 | 0.502 | 0.128 | 1.64E-220 | 10 EPB41L2    |
| 3.38E-101 | 0.907070389 | 0.814 | 0.645 | 1.09E-96  | 10 PTPRK      |

|           |             |       |       |           |               |
|-----------|-------------|-------|-------|-----------|---------------|
| 1.80E-107 | 0.901064548 | 0.445 | 0.171 | 5.79E-103 | 10 TENM3      |
| 1.04E-224 | 0.897825548 | 0.513 | 0.132 | 3.34E-220 | 10 KLHL29     |
| 4.29E-118 | 0.894376718 | 0.769 | 0.418 | 1.38E-113 | 10 NLGN1      |
| 4.61E-71  | 0.893050664 | 0.54  | 0.308 | 1.48E-66  | 10 ZFP36L1    |
| 5.50E-285 | 0.890525466 | 0.42  | 0.076 | 1.77E-280 | 10 TSPAN18    |
| 2.42E-121 | 0.889377635 | 0.732 | 0.422 | 7.76E-117 | 10 OSBPL10    |
| 2.86E-132 | 0.884750993 | 0.321 | 0.085 | 9.20E-128 | 10 ANO9       |
| 6.20E-90  | 0.870185605 | 0.431 | 0.173 | 1.99E-85  | 10 SLC47A2    |
| 2.79E-74  | 0.869308284 | 0.423 | 0.194 | 8.95E-70  | 10 AQP4-AS1   |
| 1.10E-174 | 0.868269991 | 0.558 | 0.187 | 3.52E-170 | 10 C12orf75   |
| 3.59E-68  | 0.861818205 | 0.471 | 0.217 | 1.15E-63  | 10 SLC13A1    |
| 2.70E-87  | 0.860430909 | 0.553 | 0.289 | 8.67E-83  | 10 LPGAT1     |
| 2.30E-98  | 0.856939298 | 0.469 | 0.195 | 7.40E-94  | 10 PXYLP1     |
| 6.02E-190 | 0.856710796 | 0.39  | 0.092 | 1.93E-185 | 10 RHOB       |
| 1.60E-61  | 0.853347611 | 0.577 | 0.364 | 5.15E-57  | 10 B4GALT5    |
| 3.73E-124 | 0.852822473 | 0.497 | 0.178 | 1.20E-119 | 10 AC004053.1 |
| 6.82E-198 | 0.852736426 | 0.317 | 0.061 | 2.19E-193 | 10 SATB2      |
| 6.99E-133 | 0.849953393 | 0.749 | 0.375 | 2.24E-128 | 10 RERG       |
| 4.47E-102 | 0.847417997 | 0.564 | 0.239 | 1.43E-97  | 10 AC096577.1 |
| 1.01E-54  | 0.842145315 | 0.308 | 0.132 | 3.25E-50  | 10 ATF3       |
| 7.87E-97  | 0.839823678 | 0.491 | 0.203 | 2.53E-92  | 10 RMST       |
| 1.98E-262 | 0.838695923 | 0.281 | 0.037 | 6.37E-258 | 10 AFF2       |
| 8.41E-100 | 0.833771426 | 0.57  | 0.281 | 2.70E-95  | 10 MALT1      |
| 2.26E-149 | 0.833421845 | 0.494 | 0.166 | 7.26E-145 | 10 AF228730.5 |
| 2.87E-151 | 0.83154813  | 0.923 | 0.754 | 9.22E-147 | 10 PTPRM      |
| 5.09E-123 | 0.831187409 | 0.461 | 0.17  | 1.63E-118 | 10 AC005062.1 |
| 9.13E-45  | 0.825231326 | 0.385 | 0.21  | 2.93E-40  | 10 LSAMP      |
| 2.74E-207 | 0.824672626 | 0.901 | 0.343 | 8.81E-203 | 10 ACSM2B     |
| 7.42E-119 | 0.822650686 | 0.506 | 0.196 | 2.38E-114 | 10 ROR1       |
| 1.59E-77  | 0.820247526 | 0.651 | 0.385 | 5.11E-73  | 10 PDGFC      |
| 2.27E-128 | 0.819477726 | 0.511 | 0.19  | 7.28E-124 | 10 FIGN       |
| 6.97E-179 | 0.813570019 | 0.687 | 0.237 | 2.24E-174 | 10 GLYAT      |
| 6.45E-95  | 0.811568723 | 0.712 | 0.374 | 2.07E-90  | 10 KCNJ15     |
| 2.20E-57  | 0.811407541 | 0.578 | 0.374 | 7.07E-53  | 10 ZNF608     |
| 1.38E-78  | 0.810571551 | 0.555 | 0.3   | 4.44E-74  | 10 RRAS2      |
| 5.59E-51  | 0.80843673  | 0.368 | 0.182 | 1.80E-46  | 10 HSPA1B     |
| 1.36E-101 | 0.807647502 | 0.594 | 0.293 | 4.37E-97  | 10 ZNF462     |
| 6.43E-113 | 0.806064123 | 0.471 | 0.179 | 2.06E-108 | 10 PLXNA2     |
| 6.11E-95  | 0.805979199 | 0.571 | 0.278 | 1.96E-90  | 10 SEMA6A     |
| 1.82E-112 | 0.80514004  | 0.619 | 0.296 | 5.86E-108 | 10 AC126283.2 |
| 3.50E-189 | 0.802765251 | 0.339 | 0.071 | 1.12E-184 | 10 PLA2G4C    |
| 3.81E-53  | 0.798950249 | 0.742 | 0.581 | 1.22E-48  | 10 WWC1       |
| 4.36E-120 | 0.795394569 | 0.304 | 0.082 | 1.40E-115 | 10 MIR31HG    |
| 1.53E-99  | 0.794712563 | 0.402 | 0.146 | 4.92E-95  | 10 SYNDIG1    |
| 2.37E-152 | 0.794591162 | 0.391 | 0.107 | 7.61E-148 | 10 ITGB3      |
| 8.19E-118 | 0.793651433 | 0.312 | 0.086 | 2.63E-113 | 10 ENPP1      |
| 1.60E-26  | 0.791792974 | 0.497 | 0.361 | 5.14E-22  | 10 NTN4       |
| 9.36E-80  | 0.784030475 | 0.741 | 0.515 | 3.01E-75  | 10 ZNF83      |
| 2.69E-49  | 0.783790925 | 0.765 | 0.579 | 8.63E-45  | 10 TRABD2B    |
| 2.47E-103 | 0.778717578 | 0.351 | 0.117 | 7.92E-99  | 10 KHDRBS2    |
| 4.18E-194 | 0.777290014 | 0.496 | 0.14  | 1.34E-189 | 10 MCTP2      |

|           |             |       |       |             |               |
|-----------|-------------|-------|-------|-------------|---------------|
| 8.61E-204 | 0.776473231 | 0.321 | 0.061 | 2.76E-199   | 10 IL17RB     |
| 1.47E-46  | 0.773489048 | 0.289 | 0.131 | 4.71E-42    | 10 HSPA1A     |
| 2.63E-131 | 0.771709917 | 0.309 | 0.079 | 8.46E-127   | 10 SLC35F3    |
| 1.12E-164 | 0.764409143 | 0.447 | 0.131 | 3.60E-160   | 10 SLC41A2    |
| 4.51E-144 | 0.7640347   | 0.399 | 0.113 | 1.45E-139   | 10 RBMS3      |
| 1.25E-07  | 0.753204906 | 0.367 | 0.298 | 0.004011225 | 10 PLCB4      |
| 4.79E-118 | 0.751711782 | 0.61  | 0.266 | 1.54E-113   | 10 PDZK1      |
| 1.30E-70  | 0.750156483 | 0.45  | 0.208 | 4.17E-66    | 10 TENM4      |
| 5.79E-95  | 0.746531044 | 0.729 | 0.436 | 1.86E-90    | 10 FAT1       |
| 1.55E-82  | 0.743069363 | 0.8   | 0.588 | 4.97E-78    | 10 NBEA       |
| 3.49E-120 | 0.74098589  | 0.471 | 0.177 | 1.12E-115   | 10 FGD6       |
| 2.36E-167 | 0.740834585 | 0.573 | 0.182 | 7.58E-163   | 10 SLC28A1    |
| 2.09E-84  | 0.740314313 | 0.85  | 0.736 | 6.72E-80    | 10 PICALM     |
| 1.37E-79  | 0.738933787 | 0.559 | 0.286 | 4.39E-75    | 10 RANBP17    |
| 1.00E-149 | 0.738042568 | 0.361 | 0.092 | 3.22E-145   | 10 AL033381.1 |
| 3.90E-85  | 0.737474848 | 0.427 | 0.181 | 1.25E-80    | 10 ENAH       |
| 6.23E-150 | 0.736744165 | 0.321 | 0.078 | 2.00E-145   | 10 CLDN4      |
| 3.21E-95  | 0.734718444 | 0.651 | 0.342 | 1.03E-90    | 10 SLC1A1     |
| 7.34E-112 | 0.731830036 | 0.871 | 0.608 | 2.36E-107   | 10 L3MBTL4    |
| 2.72E-102 | 0.724244449 | 0.404 | 0.146 | 8.75E-98    | 10 PHYHIPL    |
| 1.10E-99  | 0.721916936 | 0.319 | 0.101 | 3.53E-95    | 10 UBTD1      |
| 1.29E-68  | 0.72188888  | 0.361 | 0.154 | 4.14E-64    | 10 ALDH1A1    |
| 8.05E-80  | 0.721851839 | 0.482 | 0.229 | 2.59E-75    | 10 AC068234.1 |
| 1.88E-123 | 0.720436421 | 0.423 | 0.145 | 6.03E-119   | 10 USP31      |
| 2.96E-66  | 0.717620146 | 0.618 | 0.372 | 9.50E-62    | 10 MFSD14B    |
| 2.80E-86  | 0.716903539 | 0.709 | 0.435 | 9.00E-82    | 10 AC105233.4 |
| 1.38E-73  | 0.716125768 | 0.648 | 0.356 | 4.43E-69    | 10 NOX4       |
| 2.67E-75  | 0.715414369 | 0.907 | 0.799 | 8.56E-71    | 10 PLEKHA5    |
| 1.84E-50  | 0.714776993 | 0.388 | 0.2   | 5.91E-46    | 10 TPK1       |
| 1.69E-70  | 0.709607923 | 0.742 | 0.545 | 5.42E-66    | 10 EPB41L4A   |
| 5.94E-205 | 0.708562742 | 0.46  | 0.113 | 1.91E-200   | 10 USH1C      |
| 1.81E-91  | 0.706084789 | 0.279 | 0.086 | 5.83E-87    | 10 EGOT       |
| 1.90E-173 | 0.705726447 | 0.367 | 0.086 | 6.10E-169   | 10 LINC00475  |
| 2.13E-152 | 0.705516218 | 0.377 | 0.1   | 6.85E-148   | 10 SPNS2      |
| 3.49E-122 | 0.704905898 | 0.41  | 0.137 | 1.12E-117   | 10 PLS1       |
| 1.23E-291 | 0.703801474 | 0.274 | 0.031 | 3.96E-287   | 10 PXDN       |
| 3.20E-84  | 0.698288597 | 0.519 | 0.255 | 1.03E-79    | 10 HYDIN      |
| 1.04E-90  | 0.698012972 | 0.568 | 0.287 | 3.33E-86    | 10 STX3       |
| 5.41E-200 | 0.693910815 | 0.256 | 0.04  | 1.74E-195   | 10 PIWIL4     |
| 1.92E-110 | 0.692832134 | 0.604 | 0.266 | 6.18E-106   | 10 TENM1      |
| 5.38E-150 | 0.691680908 | 0.288 | 0.062 | 1.73E-145   | 10 LINC01781  |
| 3.44E-101 | 0.690400327 | 0.593 | 0.277 | 1.10E-96    | 10 AC007319.1 |
| 1.48E-69  | 0.690327079 | 0.872 | 0.736 | 4.77E-65    | 10 OXR1       |
| 6.02E-90  | 0.689717079 | 0.472 | 0.205 | 1.93E-85    | 10 AP000295.1 |
| 7.23E-61  | 0.687042156 | 0.816 | 0.66  | 2.32E-56    | 10 PAX8-AS1   |
| 2.72E-100 | 0.687028716 | 0.506 | 0.222 | 8.75E-96    | 10 RHPN2      |
| 2.12E-59  | 0.68527569  | 0.299 | 0.12  | 6.82E-55    | 10 H2AC6      |
| 4.61E-71  | 0.685205016 | 0.873 | 0.769 | 1.48E-66    | 10 FARP1      |
| 3.88E-42  | 0.683017775 | 0.536 | 0.357 | 1.24E-37    | 10 JADE1      |
| 4.86E-72  | 0.680700538 | 0.812 | 0.685 | 1.56E-67    | 10 NUMB       |
| 2.78E-92  | 0.680238761 | 0.899 | 0.784 | 8.94E-88    | 10 AGAP1      |

|           |             |       |       |           |               |
|-----------|-------------|-------|-------|-----------|---------------|
| 6.75E-63  | 0.679775518 | 0.815 | 0.591 | 2.17E-58  | 10 ADAMTS9    |
| 6.88E-114 | 0.679578263 | 0.462 | 0.171 | 2.21E-109 | 10 IQCA1      |
| 1.84E-43  | 0.67829651  | 0.559 | 0.357 | 5.89E-39  | 10 LMCD1-AS1  |
| 5.61E-101 | 0.674409267 | 0.614 | 0.279 | 1.80E-96  | 10 CNTNAP3P2  |
| 4.57E-78  | 0.669832117 | 0.564 | 0.306 | 1.47E-73  | 10 BEND7      |
| 4.89E-77  | 0.665486584 | 0.615 | 0.331 | 1.57E-72  | 10 C9         |
| 1.74E-67  | 0.66407907  | 0.85  | 0.779 | 5.59E-63  | 10 AOPEP      |
| 1.30E-66  | 0.663803474 | 0.414 | 0.191 | 4.17E-62  | 10 ITGA3      |
| 6.20E-85  | 0.663256587 | 0.58  | 0.28  | 1.99E-80  | 10 LINC01515  |
| 4.23E-118 | 0.661284956 | 0.345 | 0.103 | 1.36E-113 | 10 LINC01322  |
| 2.94E-37  | 0.65949543  | 0.39  | 0.217 | 9.43E-33  | 10 FGF14      |
| 1.00E-80  | 0.658095682 | 0.493 | 0.226 | 3.21E-76  | 10 NR1H4      |
| 5.03E-55  | 0.657314864 | 0.693 | 0.538 | 1.62E-50  | 10 DIP2B      |
| 4.68E-93  | 0.655812528 | 0.52  | 0.226 | 1.50E-88  | 10 CNTNAP3    |
| 1.29E-180 | 0.655105394 | 0.336 | 0.073 | 4.15E-176 | 10 SBSPON     |
| 1.87E-190 | 0.654256652 | 0.396 | 0.092 | 5.99E-186 | 10 AC092894.1 |
| 4.50E-88  | 0.65410718  | 0.676 | 0.346 | 1.44E-83  | 10 CNTNAP3B   |
| 1.08E-72  | 0.650976947 | 0.649 | 0.384 | 3.48E-68  | 10 DIAPH2     |
| 1.21E-56  | 0.647272318 | 0.689 | 0.489 | 3.88E-52  | 10 TBC1D19    |
| 6.82E-91  | 0.646974348 | 0.478 | 0.201 | 2.19E-86  | 10 ZNF826P    |
| 5.24E-32  | 0.646146899 | 0.448 | 0.282 | 1.68E-27  | 10 LINC00871  |
| 2.69E-160 | 0.64572245  | 0.381 | 0.099 | 8.65E-156 | 10 NEK6       |
| 5.40E-62  | 0.643509894 | 0.721 | 0.521 | 1.74E-57  | 10 ARHGAP32   |
| 1.25E-99  | 0.6414131   | 0.587 | 0.257 | 4.01E-95  | 10 SLC47A1    |
| 3.74E-123 | 0.640365695 | 0.323 | 0.088 | 1.20E-118 | 10 HKDC1      |
| 3.81E-55  | 0.638727138 | 0.718 | 0.503 | 1.23E-50  | 10 AUTS2      |
| 8.89E-46  | 0.638049932 | 0.427 | 0.238 | 2.85E-41  | 10 NPR3       |
| 4.84E-238 | 0.637695661 | 0.267 | 0.036 | 1.55E-233 | 10 NXNL2      |
| 1.04E-74  | 0.637435184 | 0.433 | 0.198 | 3.32E-70  | 10 TNFRSF10B  |
| 8.13E-50  | 0.63737292  | 0.546 | 0.331 | 2.61E-45  | 10 AL139807.1 |
| 9.37E-57  | 0.636203262 | 0.655 | 0.414 | 3.01E-52  | 10 EPS8L2     |
| 2.79E-76  | 0.632291998 | 0.502 | 0.245 | 8.96E-72  | 10 DCDC1      |
| 1.14E-72  | 0.629982286 | 0.938 | 0.878 | 3.66E-68  | 10 SYNE2      |
| 6.10E-49  | 0.625292576 | 0.709 | 0.517 | 1.96E-44  | 10 ST7        |
| 7.09E-150 | 0.622129883 | 0.657 | 0.265 | 2.28E-145 | 10 CALD1      |
| 4.23E-49  | 0.620331967 | 0.772 | 0.629 | 1.36E-44  | 10 SCMHI      |
| 5.76E-66  | 0.619435574 | 0.682 | 0.427 | 1.85E-61  | 10 EGFR       |
| 4.86E-52  | 0.616642463 | 0.441 | 0.229 | 1.56E-47  | 10 ANKS1B     |
| 2.73E-78  | 0.614726357 | 0.322 | 0.118 | 8.78E-74  | 10 RASEF      |
| 1.11E-44  | 0.613938894 | 0.779 | 0.674 | 3.56E-40  | 10 EXT1       |
| 3.89E-131 | 0.613593527 | 0.629 | 0.248 | 1.25E-126 | 10 ARHGAP10   |
| 1.43E-46  | 0.613426362 | 0.704 | 0.534 | 4.60E-42  | 10 SVIL       |
| 1.73E-105 | 0.612661363 | 0.463 | 0.174 | 5.55E-101 | 10 ABCC6      |
| 2.07E-65  | 0.611428015 | 0.83  | 0.678 | 6.63E-61  | 10 PLXDC2     |
| 5.85E-76  | 0.61002658  | 0.377 | 0.151 | 1.88E-71  | 10 MGST1      |
| 9.51E-96  | 0.609744373 | 0.486 | 0.207 | 3.06E-91  | 10 KALRN      |
| 9.18E-193 | 0.609743175 | 0.293 | 0.053 | 2.95E-188 | 10 BMX        |
| 2.69E-52  | 0.607428398 | 0.839 | 0.704 | 8.65E-48  | 10 UBE2E2     |
| 1.09E-81  | 0.606558109 | 0.409 | 0.161 | 3.49E-77  | 10 KCNIP1     |
| 3.60E-241 | 0.605474452 | 0.274 | 0.038 | 1.16E-236 | 10 AC111000.4 |
| 1.41E-43  | 0.603193044 | 0.591 | 0.402 | 4.52E-39  | 10 ANXA4      |



|           |             |       |       |           |                 |
|-----------|-------------|-------|-------|-----------|-----------------|
| 3.00E-80  | 0.602578511 | 0.411 | 0.17  | 9.65E-76  | 10 POU5F1       |
| 4.86E-154 | 0.60242572  | 0.449 | 0.132 | 1.56E-149 | 10 DNMI         |
| 4.38E-18  | 0.601647133 | 0.32  | 0.208 | 1.41E-13  | 10 NAMPT        |
| 1.41E-16  | 0.599865589 | 0.268 | 0.172 | 4.52E-12  | 10 TP53BP2      |
| 3.49E-72  | 0.598753527 | 0.335 | 0.133 | 1.12E-67  | 10 MTCL1        |
| 6.01E-49  | 0.598650721 | 0.505 | 0.306 | 1.93E-44  | 10 BMP2K        |
| 1.42E-45  | 0.598159194 | 0.8   | 0.672 | 4.57E-41  | 10 PLEKHA7      |
| 1.02E-71  | 0.597528737 | 0.905 | 0.875 | 3.26E-67  | 10 LPP          |
| 5.36E-76  | 0.592045248 | 0.831 | 0.58  | 1.72E-71  | 10 AC068587.4   |
| 4.14E-46  | 0.591750342 | 0.657 | 0.425 | 1.33E-41  | 10 CPM          |
| 1.72E-51  | 0.591155774 | 0.752 | 0.611 | 5.53E-47  | 10 SIPA1L1      |
| 1.19E-75  | 0.587250046 | 0.447 | 0.206 | 3.81E-71  | 10 HYDIN2       |
| 4.83E-64  | 0.586843751 | 0.478 | 0.238 | 1.55E-59  | 10 ADAMTS9-AS1  |
| 1.38E-44  | 0.583820341 | 0.692 | 0.516 | 4.42E-40  | 10 RNF19A       |
| 2.09E-41  | 0.583522134 | 0.624 | 0.464 | 6.71E-37  | 10 CASK         |
| 1.86E-61  | 0.583168391 | 0.383 | 0.17  | 5.98E-57  | 10 SLC12A7      |
| 2.19E-49  | 0.581730306 | 0.728 | 0.517 | 7.04E-45  | 10 PAX8         |
| 3.27E-51  | 0.580147813 | 0.493 | 0.275 | 1.05E-46  | 10 PCDHGA1      |
| 2.23E-42  | 0.580106543 | 0.456 | 0.276 | 7.15E-38  | 10 PLSCR1       |
| 1.88E-48  | 0.579942879 | 0.767 | 0.619 | 6.04E-44  | 10 PPP1R9A      |
| 1.19E-138 | 0.579103547 | 0.368 | 0.1   | 3.83E-134 | 10 AL358232.1   |
| 4.12E-45  | 0.577259011 | 0.349 | 0.172 | 1.32E-40  | 10 AHR          |
| 4.26E-46  | 0.576236237 | 0.494 | 0.303 | 1.37E-41  | 10 AGPS         |
| 1.66E-66  | 0.575467736 | 0.59  | 0.328 | 5.34E-62  | 10 KIF21A       |
| 8.03E-55  | 0.574837955 | 0.476 | 0.257 | 2.58E-50  | 10 SLC44A3      |
| 5.90E-80  | 0.572435188 | 0.4   | 0.168 | 1.89E-75  | 10 RASSF6       |
| 5.37E-70  | 0.5722378   | 0.36  | 0.146 | 1.73E-65  | 10 JUN          |
| 7.15E-46  | 0.569247424 | 0.734 | 0.584 | 2.29E-41  | 10 SPTBN1       |
| 9.43E-54  | 0.559134825 | 0.55  | 0.335 | 3.03E-49  | 10 MAP4K4       |
| 1.43E-116 | 0.558069137 | 0.365 | 0.114 | 4.58E-112 | 10 CORO1C       |
| 3.06E-47  | 0.557435648 | 0.608 | 0.396 | 9.82E-43  | 10 GULP1        |
| 2.37E-43  | 0.55640512  | 0.571 | 0.378 | 7.62E-39  | 10 PDZD8        |
| 5.03E-55  | 0.555638297 | 0.589 | 0.371 | 1.62E-50  | 10 CCDC14       |
| 1.78E-31  | 0.55531084  | 0.612 | 0.412 | 5.72E-27  | 10 ANK2         |
| 7.23E-78  | 0.554215188 | 0.493 | 0.228 | 2.32E-73  | 10 RGS12        |
| 5.40E-133 | 0.553614015 | 0.543 | 0.181 | 1.73E-128 | 10 DPYS         |
| 4.68E-92  | 0.552358846 | 0.47  | 0.19  | 1.50E-87  | 10 GIPC2        |
| 4.80E-79  | 0.551407674 | 0.404 | 0.165 | 1.54E-74  | 10 RIPOR3       |
| 6.75E-44  | 0.547069996 | 0.553 | 0.34  | 2.17E-39  | 10 PDE7A        |
| 1.33E-58  | 0.547026138 | 0.854 | 0.774 | 4.26E-54  | 10 CUX1         |
| 2.64E-189 | 0.546583132 | 0.29  | 0.052 | 8.48E-185 | 10 VIM          |
| 1.30E-57  | 0.546492352 | 0.542 | 0.307 | 4.18E-53  | 10 ADCY9        |
| 2.00E-56  | 0.546099647 | 0.398 | 0.192 | 6.42E-52  | 10 HOGA1        |
| 2.34E-32  | 0.546030432 | 0.453 | 0.29  | 7.53E-28  | 10 FUT8         |
| 6.09E-47  | 0.544816988 | 0.477 | 0.271 | 1.96E-42  | 10 ANKRD6       |
| 1.78E-35  | 0.544592738 | 0.719 | 0.557 | 5.70E-31  | 10 P3H2         |
| 2.81E-45  | 0.542108639 | 0.72  | 0.56  | 9.03E-41  | 10 PAM          |
| 1.31E-77  | 0.539461562 | 0.265 | 0.084 | 4.21E-73  | 10 ARHGAP29-AS1 |
| 8.03E-37  | 0.538841167 | 0.364 | 0.199 | 2.58E-32  | 10 RNF144B      |
| 8.50E-56  | 0.538148222 | 0.816 | 0.645 | 2.73E-51  | 10 EHBP1        |
| 4.05E-174 | 0.536889749 | 0.255 | 0.044 | 1.30E-169 | 10 MIR34AHG     |

|           |             |       |       |           |               |
|-----------|-------------|-------|-------|-----------|---------------|
| 6.27E-31  | 0.53662029  | 0.511 | 0.353 | 2.01E-26  | 10 NFKB1      |
| 3.38E-124 | 0.536010367 | 0.333 | 0.092 | 1.08E-119 | 10 GATM       |
| 3.23E-37  | 0.535576191 | 0.471 | 0.289 | 1.04E-32  | 10 YPEL2      |
| 2.11E-65  | 0.534303514 | 0.352 | 0.14  | 6.78E-61  | 10 PDZK1IP1   |
| 7.76E-44  | 0.531758705 | 0.654 | 0.471 | 2.49E-39  | 10 ITGAV      |
| 1.47E-43  | 0.53110936  | 0.619 | 0.423 | 4.72E-39  | 10 CEP112     |
| 1.95E-50  | 0.528442466 | 0.352 | 0.16  | 6.26E-46  | 10 CXXC4-AS1  |
| 8.25E-97  | 0.52793576  | 0.351 | 0.117 | 2.65E-92  | 10 TMEM176B   |
| 4.97E-79  | 0.527927294 | 0.324 | 0.116 | 1.60E-74  | 10 ACTN1      |
| 9.77E-110 | 0.525935707 | 0.311 | 0.088 | 3.14E-105 | 10 PROS1      |
| 7.38E-42  | 0.523574478 | 0.633 | 0.428 | 2.37E-37  | 10 BICDL1     |
| 1.12E-69  | 0.522658859 | 0.491 | 0.234 | 3.61E-65  | 10 CABLES1    |
| 8.83E-39  | 0.52170392  | 0.666 | 0.507 | 2.84E-34  | 10 CFDP1      |
| 5.21E-94  | 0.520872515 | 0.309 | 0.098 | 1.67E-89  | 10 LACTB2-AS1 |
| 2.49E-53  | 0.518958542 | 0.288 | 0.118 | 8.00E-49  | 10 SLC25A21   |
| 2.82E-24  | 0.518890872 | 0.81  | 0.726 | 9.04E-20  | 10 GLS        |
| 3.70E-30  | 0.518820929 | 0.727 | 0.568 | 1.19E-25  | 10 DCDC2      |
| 5.82E-134 | 0.51746206  | 0.371 | 0.103 | 1.87E-129 | 10 MYO7B      |
| 2.99E-62  | 0.517175236 | 0.374 | 0.164 | 9.61E-58  | 10 LRRIQ1     |
| 2.53E-88  | 0.51708431  | 0.732 | 0.426 | 8.14E-84  | 10 EPS8       |
| 3.02E-39  | 0.516613057 | 0.46  | 0.27  | 9.71E-35  | 10 LINC01572  |
| 4.30E-41  | 0.515861527 | 0.771 | 0.634 | 1.38E-36  | 10 TNS3       |
| 4.12E-107 | 0.515251302 | 0.385 | 0.127 | 1.32E-102 | 10 LINC01697  |
| 4.81E-37  | 0.513047488 | 0.473 | 0.285 | 1.55E-32  | 10 AL050309.1 |
| 8.28E-50  | 0.511221666 | 0.935 | 0.864 | 2.66E-45  | 10 ANK3       |
| 1.59E-66  | 0.51091574  | 0.321 | 0.126 | 5.09E-62  | 10 FLVCR2     |
| 6.76E-76  | 0.508549312 | 0.553 | 0.252 | 2.17E-71  | 10 TINAG      |
| 3.18E-36  | 0.508187643 | 0.285 | 0.137 | 1.02E-31  | 10 AL031599.1 |
| 1.18E-43  | 0.507013384 | 0.547 | 0.348 | 3.79E-39  | 10 ADGRA3     |
| 2.25E-146 | 0.506249564 | 0.302 | 0.068 | 7.23E-142 | 10 LDLRAD3    |
| 2.83E-64  | 0.505946219 | 0.464 | 0.222 | 9.10E-60  | 10 AC010894.2 |
| 2.03E-36  | 0.504384315 | 0.739 | 0.617 | 6.51E-32  | 10 TBL1XR1    |
| 4.72E-98  | 0.503362939 | 0.33  | 0.105 | 1.52E-93  | 10 AFF3       |
| 1.13E-57  | 0.502642011 | 0.512 | 0.276 | 3.63E-53  | 10 SNX30      |
| 2.79E-72  | 0.500691888 | 0.412 | 0.172 | 8.97E-68  | 10 DOK6       |
| 1.26E-96  | 0.500383121 | 0.642 | 0.284 | 4.05E-92  | 10 ENPEP      |
| 2.88E-39  | 0.499010932 | 0.395 | 0.216 | 9.25E-35  | 10 ZMIZ2      |
| 9.55E-56  | 0.49886279  | 0.324 | 0.137 | 3.07E-51  | 10 NSMF       |
| 2.98E-80  | 0.498444633 | 0.537 | 0.245 | 9.56E-76  | 10 DOCK8      |
| 5.49E-51  | 0.496515298 | 0.397 | 0.197 | 1.76E-46  | 10 PLCH1      |
| 1.53E-68  | 0.496242616 | 0.485 | 0.226 | 4.91E-64  | 10 RGL1       |
| 2.51E-63  | 0.495349908 | 0.967 | 0.845 | 8.07E-59  | 10 LRMDA      |
| 8.56E-38  | 0.494588256 | 0.259 | 0.12  | 2.75E-33  | 10 LINC00907  |
| 1.04E-62  | 0.494502046 | 0.253 | 0.091 | 3.34E-58  | 10 PROSER2    |
| 5.12E-42  | 0.494207005 | 0.551 | 0.349 | 1.65E-37  | 10 PPP1R13B   |
| 3.89E-47  | 0.493800721 | 0.615 | 0.405 | 1.25E-42  | 10 NEO1       |
| 1.39E-235 | 0.493702848 | 0.271 | 0.038 | 4.46E-231 | 10 PCA3       |
| 2.82E-26  | 0.49146831  | 0.8   | 0.657 | 9.07E-22  | 10 MAST4      |
| 4.01E-40  | 0.48976262  | 0.828 | 0.721 | 1.29E-35  | 10 KANSL1L    |
| 5.28E-114 | 0.488825237 | 0.326 | 0.093 | 1.70E-109 | 10 DNAH5      |
| 1.36E-35  | 0.48820807  | 0.623 | 0.454 | 4.38E-31  | 10 JAK1       |

|           |             |       |       |           |               |
|-----------|-------------|-------|-------|-----------|---------------|
| 5.10E-89  | 0.487953879 | 0.275 | 0.083 | 1.64E-84  | 10 ANTXR1     |
| 4.07E-18  | 0.485027259 | 0.337 | 0.219 | 1.31E-13  | 10 TXNRD1     |
| 1.64E-114 | 0.484641167 | 0.324 | 0.09  | 5.28E-110 | 10 ABLIM3     |
| 2.43E-25  | 0.483500308 | 0.522 | 0.369 | 7.79E-21  | 10 HIVEP1     |
| 6.40E-34  | 0.482144947 | 0.591 | 0.4   | 2.06E-29  | 10 CCNL2      |
| 3.55E-56  | 0.480980316 | 0.439 | 0.22  | 1.14E-51  | 10 CAP2       |
| 1.89E-34  | 0.479165947 | 0.619 | 0.441 | 6.06E-30  | 10 CDR2       |
| 3.54E-29  | 0.47874563  | 0.708 | 0.593 | 1.14E-24  | 10 WWC2       |
| 1.22E-35  | 0.478322911 | 0.517 | 0.32  | 3.93E-31  | 10 LDLRAD4    |
| 8.59E-35  | 0.478144715 | 0.335 | 0.181 | 2.76E-30  | 10 SHROOM2    |
| 2.42E-32  | 0.476268352 | 0.686 | 0.527 | 7.78E-28  | 10 NR6A1      |
| 2.76E-50  | 0.475883511 | 0.489 | 0.266 | 8.88E-46  | 10 CDK10      |
| 2.12E-106 | 0.475644921 | 0.652 | 0.304 | 6.80E-102 | 10 ABCC4      |
| 3.27E-52  | 0.475530696 | 0.459 | 0.248 | 1.05E-47  | 10 SHTN1      |
| 2.71E-38  | 0.474796247 | 0.71  | 0.54  | 8.70E-34  | 10 CMIP       |
| 1.59E-46  | 0.47423116  | 0.574 | 0.358 | 5.10E-42  | 10 ENPP7P6    |
| 6.47E-53  | 0.473998177 | 0.312 | 0.134 | 2.08E-48  | 10 GRM5       |
| 1.54E-45  | 0.473388642 | 0.277 | 0.124 | 4.93E-41  | 10 FTH1       |
| 2.35E-24  | 0.471999531 | 0.728 | 0.614 | 7.55E-20  | 10 SPAG9      |
| 1.53E-55  | 0.471710581 | 0.902 | 0.79  | 4.91E-51  | 10 RBPMS      |
| 7.62E-28  | 0.471606707 | 0.676 | 0.534 | 2.45E-23  | 10 ZHX2       |
| 5.30E-79  | 0.471538311 | 0.344 | 0.122 | 1.70E-74  | 10 LINC02027  |
| 7.07E-23  | 0.470916662 | 0.486 | 0.351 | 2.27E-18  | 10 STON2      |
| 1.80E-53  | 0.470696071 | 0.34  | 0.146 | 5.77E-49  | 10 CDH9       |
| 4.28E-74  | 0.470529613 | 0.972 | 0.967 | 1.38E-69  | 10 ZBTB20     |
| 1.75E-43  | 0.468424546 | 0.604 | 0.398 | 5.62E-39  | 10 CAMK2D     |
| 1.03E-97  | 0.467564479 | 0.29  | 0.085 | 3.31E-93  | 10 RBP5       |
| 2.78E-45  | 0.466953944 | 0.594 | 0.372 | 8.92E-41  | 10 FRMD4B     |
| 8.02E-24  | 0.466817306 | 0.382 | 0.246 | 2.58E-19  | 10 KHDRBS3    |
| 4.05E-53  | 0.465358109 | 0.332 | 0.145 | 1.30E-48  | 10 ENPP7P7    |
| 3.75E-58  | 0.465077425 | 0.535 | 0.283 | 1.20E-53  | 10 KIAA1549   |
| 1.21E-28  | 0.46374332  | 0.572 | 0.406 | 3.89E-24  | 10 ASTN2      |
| 1.32E-67  | 0.46204566  | 0.316 | 0.118 | 4.23E-63  | 10 C4B        |
| 2.09E-51  | 0.461577261 | 0.338 | 0.153 | 6.71E-47  | 10 WDR13      |
| 1.29E-113 | 0.461241107 | 0.258 | 0.063 | 4.13E-109 | 10 ZSWIM4     |
| 7.65E-41  | 0.460643043 | 0.509 | 0.297 | 2.46E-36  | 10 ALCAM      |
| 4.67E-75  | 0.460118472 | 0.277 | 0.092 | 1.50E-70  | 10 DPYSL2     |
| 2.73E-40  | 0.458824977 | 0.463 | 0.256 | 8.78E-36  | 10 Z93403.1   |
| 3.48E-34  | 0.455040875 | 0.291 | 0.147 | 1.12E-29  | 10 PNPLA2     |
| 2.08E-57  | 0.454328634 | 0.698 | 0.434 | 6.68E-53  | 10 SUGCT      |
| 1.96E-58  | 0.454194998 | 0.474 | 0.229 | 6.30E-54  | 10 AL391117.1 |
| 2.36E-31  | 0.454040703 | 0.572 | 0.421 | 7.58E-27  | 10 VPS41      |
| 2.32E-41  | 0.453739258 | 0.739 | 0.59  | 7.46E-37  | 10 VPS13A     |
| 4.01E-25  | 0.453666941 | 0.292 | 0.163 | 1.29E-20  | 10 GDF15      |
| 7.96E-36  | 0.453114807 | 0.578 | 0.387 | 2.56E-31  | 10 SLC3A1     |
| 2.96E-44  | 0.452846518 | 0.441 | 0.238 | 9.50E-40  | 10 NPAS2      |
| 1.90E-38  | 0.4526634   | 0.67  | 0.489 | 6.09E-34  | 10 SH3D19     |
| 1.45E-27  | 0.452302708 | 0.378 | 0.233 | 4.67E-23  | 10 EEF1A1     |
| 5.66E-51  | 0.450681434 | 0.535 | 0.297 | 1.82E-46  | 10 NR3C1      |
| 6.10E-27  | 0.450521223 | 0.737 | 0.63  | 1.96E-22  | 10 ARHGEF28   |
| 4.59E-17  | 0.449005927 | 0.256 | 0.153 | 1.47E-12  | 10 EGR1       |

|           |             |       |       |           |               |
|-----------|-------------|-------|-------|-----------|---------------|
| 1.96E-24  | 0.447914923 | 0.283 | 0.16  | 6.28E-20  | 10 RFTN1      |
| 4.29E-40  | 0.447438216 | 0.404 | 0.224 | 1.38E-35  | 10 ABCC1      |
| 2.49E-58  | 0.446563927 | 0.335 | 0.142 | 8.00E-54  | 10 AC127526.2 |
| 5.09E-106 | 0.446100219 | 0.393 | 0.133 | 1.63E-101 | 10 OCIAD2     |
| 1.77E-17  | 0.445708996 | 0.33  | 0.216 | 5.68E-13  | 10 NLGN4Y     |
| 5.64E-26  | 0.445566606 | 0.613 | 0.463 | 1.81E-21  | 10 FLNB       |
| 6.81E-28  | 0.444873709 | 0.445 | 0.288 | 2.19E-23  | 10 LAMC1      |
| 1.85E-36  | 0.443434764 | 0.896 | 0.793 | 5.94E-32  | 10 MAML2      |
| 6.32E-21  | 0.442774009 | 0.506 | 0.376 | 2.03E-16  | 10 ATP13A3    |
| 2.17E-19  | 0.442771222 | 0.549 | 0.447 | 6.98E-15  | 10 AGFG1      |
| 2.67E-50  | 0.442255556 | 0.372 | 0.178 | 8.58E-46  | 10 BAZ1A      |
| 1.74E-31  | 0.441822722 | 0.402 | 0.244 | 5.58E-27  | 10 TRIM38     |
| 1.18E-37  | 0.441350834 | 0.45  | 0.269 | 3.79E-33  | 10 GAB2       |
| 2.11E-32  | 0.440260373 | 0.819 | 0.742 | 6.76E-28  | 10 WDFY3      |
| 5.05E-84  | 0.44022592  | 0.251 | 0.073 | 1.62E-79  | 10 FGFR4      |
| 3.30E-23  | 0.438471043 | 0.687 | 0.576 | 1.06E-18  | 10 STRN3      |
| 2.07E-89  | 0.437935212 | 0.584 | 0.243 | 6.65E-85  | 10 PAH        |
| 3.83E-24  | 0.43713637  | 0.569 | 0.409 | 1.23E-19  | 10 ZNF124     |
| 1.83E-27  | 0.43476633  | 0.712 | 0.604 | 5.87E-23  | 10 CD2AP      |
| 1.99E-60  | 0.434629861 | 0.256 | 0.09  | 6.38E-56  | 10 AJAP1      |
| 5.94E-24  | 0.434189104 | 0.615 | 0.475 | 1.91E-19  | 10 COL18A1    |
| 1.92E-80  | 0.433700594 | 0.326 | 0.112 | 6.17E-76  | 10 TTYH3      |
| 3.02E-27  | 0.433261031 | 0.744 | 0.546 | 9.71E-23  | 10 ZBTB16     |
| 2.33E-57  | 0.430530538 | 0.52  | 0.263 | 7.49E-53  | 10 CCNT2-AS1  |
| 1.27E-13  | 0.428160504 | 0.614 | 0.54  | 4.08E-09  | 10 LRRFIP2    |
| 3.35E-30  | 0.428113693 | 0.507 | 0.34  | 1.07E-25  | 10 SEMA4D     |
| 1.31E-43  | 0.427750472 | 0.492 | 0.279 | 4.22E-39  | 10 DIXDC1     |
| 1.75E-38  | 0.427722727 | 0.296 | 0.14  | 5.61E-34  | 10 FGFR3      |
| 3.45E-33  | 0.427350779 | 0.65  | 0.505 | 1.11E-28  | 10 PIK3CB     |
| 2.23E-68  | 0.427247915 | 0.375 | 0.155 | 7.18E-64  | 10 PDZK1P1    |
| 1.48E-23  | 0.426532421 | 0.558 | 0.41  | 4.76E-19  | 10 EZR        |
| 3.92E-112 | 0.426418999 | 0.336 | 0.097 | 1.26E-107 | 10 TFEC       |
| 7.87E-30  | 0.425153713 | 0.695 | 0.537 | 2.53E-25  | 10 PCAT1      |
| 2.94E-50  | 0.425103911 | 0.508 | 0.28  | 9.44E-46  | 10 CELSR1     |
| 2.71E-36  | 0.424729495 | 0.392 | 0.214 | 8.69E-32  | 10 SLCO3A1    |
| 6.58E-58  | 0.423931795 | 0.297 | 0.117 | 2.11E-53  | 10 TNFAIP8    |
| 4.10E-27  | 0.423826348 | 0.62  | 0.451 | 1.32E-22  | 10 AC009120.2 |
| 3.03E-33  | 0.423519144 | 0.689 | 0.538 | 9.74E-29  | 10 XPR1       |
| 2.45E-56  | 0.423292461 | 0.466 | 0.241 | 7.86E-52  | 10 TPTE2P6    |
| 5.90E-63  | 0.423103993 | 0.286 | 0.108 | 1.90E-58  | 10 SMYD2      |
| 4.27E-62  | 0.423098973 | 0.296 | 0.113 | 1.37E-57  | 10 LPAR6      |
| 7.47E-49  | 0.419236802 | 0.422 | 0.215 | 2.40E-44  | 10 AL390879.1 |
| 3.16E-47  | 0.41827733  | 0.422 | 0.221 | 1.01E-42  | 10 RNF217     |
| 1.68E-34  | 0.418239218 | 0.47  | 0.292 | 5.39E-30  | 10 BIVM       |
| 2.13E-65  | 0.41815671  | 0.575 | 0.283 | 6.86E-61  | 10 MIR100HG   |
| 3.45E-27  | 0.4160497   | 0.707 | 0.536 | 1.11E-22  | 10 NPIPBI2    |
| 1.01E-26  | 0.415791453 | 0.604 | 0.446 | 3.26E-22  | 10 PUM3       |
| 5.19E-35  | 0.415069678 | 0.688 | 0.506 | 1.67E-30  | 10 MAP3K13    |
| 6.48E-36  | 0.414611153 | 0.559 | 0.359 | 2.08E-31  | 10 PLEKHA6    |
| 9.24E-34  | 0.414230876 | 0.66  | 0.489 | 2.97E-29  | 10 SMG1P3     |
| 8.28E-56  | 0.412623167 | 0.336 | 0.145 | 2.66E-51  | 10 NABP1      |

|           |             |       |       |           |                |
|-----------|-------------|-------|-------|-----------|----------------|
| 1.53E-57  | 0.411778355 | 0.367 | 0.163 | 4.90E-53  | 10 NECTIN3     |
| 6.65E-31  | 0.411249218 | 0.496 | 0.318 | 2.14E-26  | 10 RRBPI       |
| 1.65E-34  | 0.410614146 | 0.502 | 0.317 | 5.29E-30  | 10 STK38       |
| 1.09E-33  | 0.408824591 | 0.483 | 0.295 | 3.52E-29  | 10 AC092683.1  |
| 3.87E-29  | 0.408221456 | 0.736 | 0.585 | 1.24E-24  | 10 PTPRJ       |
| 7.05E-51  | 0.407091104 | 0.255 | 0.1   | 2.26E-46  | 10 CD151       |
| 3.71E-29  | 0.406780432 | 0.256 | 0.13  | 1.19E-24  | 10 PPP1R26-AS1 |
| 7.61E-37  | 0.405995806 | 0.329 | 0.164 | 2.44E-32  | 10 FIGNL1      |
| 1.48E-44  | 0.405924439 | 0.433 | 0.232 | 4.74E-40  | 10 ATP11C      |
| 1.17E-96  | 0.405157694 | 0.263 | 0.071 | 3.75E-92  | 10 AC003984.1  |
| 6.98E-37  | 0.404130317 | 0.279 | 0.131 | 2.24E-32  | 10 GSDME       |
| 1.41E-33  | 0.403920138 | 0.333 | 0.176 | 4.53E-29  | 10 PLXNB2      |
| 1.81E-55  | 0.402165483 | 0.386 | 0.184 | 5.82E-51  | 10 CTTNBP2NL   |
| 1.43E-63  | 0.402008633 | 0.291 | 0.111 | 4.59E-59  | 10 LINC01948   |
| 2.81E-23  | 0.401056558 | 0.438 | 0.289 | 9.02E-19  | 10 LINC01090   |
| 1.14E-29  | 0.400575869 | 0.256 | 0.129 | 3.66E-25  | 10 HAVCR2      |
| 3.30E-21  | 0.398354199 | 0.66  | 0.508 | 1.06E-16  | 10 ANKRD36C    |
| 7.80E-33  | 0.398224877 | 0.282 | 0.141 | 2.50E-28  | 10 DNAJC6      |
| 5.28E-18  | 0.398022639 | 0.497 | 0.379 | 1.70E-13  | 10 SESTD1      |
| 1.50E-79  | 0.39771977  | 0.258 | 0.078 | 4.80E-75  | 10 FMO1        |
| 7.52E-27  | 0.397540212 | 0.612 | 0.451 | 2.42E-22  | 10 AC079781.5  |
| 2.96E-27  | 0.397287426 | 0.642 | 0.483 | 9.51E-23  | 10 CCDC30      |
| 2.27E-26  | 0.397120774 | 0.789 | 0.655 | 7.28E-22  | 10 INSR        |
| 1.09E-43  | 0.396970148 | 0.492 | 0.271 | 3.49E-39  | 10 CTTNBP2     |
| 3.63E-62  | 0.39691009  | 0.682 | 0.399 | 1.17E-57  | 10 GRB10       |
| 1.72E-13  | 0.39680282  | 0.334 | 0.231 | 5.51E-09  | 10 GK          |
| 1.13E-39  | 0.395669377 | 0.63  | 0.405 | 3.64E-35  | 10 MCF2L       |
| 1.27E-28  | 0.395518693 | 0.413 | 0.251 | 4.08E-24  | 10 EVA1A       |
| 1.52E-19  | 0.394797704 | 0.501 | 0.361 | 4.89E-15  | 10 MDM2        |
| 4.52E-25  | 0.394776996 | 0.624 | 0.467 | 1.45E-20  | 10 COBL        |
| 8.79E-42  | 0.394350575 | 0.44  | 0.238 | 2.82E-37  | 10 ARSB        |
| 3.62E-42  | 0.394199213 | 0.417 | 0.234 | 1.16E-37  | 10 ENO4        |
| 7.21E-43  | 0.392932563 | 0.292 | 0.131 | 2.31E-38  | 10 BBOX1-AS1   |
| 2.21E-19  | 0.392906334 | 0.702 | 0.58  | 7.11E-15  | 10 TNS1        |
| 3.18E-112 | 0.392754193 | 0.26  | 0.063 | 1.02E-107 | 10 PRAG1       |
| 9.75E-46  | 0.392708014 | 0.388 | 0.197 | 3.13E-41  | 10 LBR         |
| 2.82E-38  | 0.392602617 | 0.418 | 0.23  | 9.07E-34  | 10 SLC2A13     |
| 3.37E-35  | 0.3921487   | 0.649 | 0.469 | 1.08E-30  | 10 FCHSD2      |
| 3.80E-70  | 0.387565146 | 0.457 | 0.199 | 1.22E-65  | 10 SHMT1       |
| 5.75E-33  | 0.386893285 | 0.296 | 0.15  | 1.85E-28  | 10 SLCO4C1     |
| 1.91E-32  | 0.38596298  | 0.663 | 0.457 | 6.13E-28  | 10 ANKRD36B    |
| 6.23E-66  | 0.38582885  | 0.324 | 0.124 | 2.00E-61  | 10 CHDH        |
| 3.34E-17  | 0.385481323 | 0.502 | 0.38  | 1.07E-12  | 10 PTPN1       |
| 1.61E-37  | 0.384697883 | 0.397 | 0.218 | 5.18E-33  | 10 LRRC1       |
| 2.89E-21  | 0.384636266 | 0.425 | 0.292 | 9.29E-17  | 10 TUSC3       |
| 2.20E-52  | 0.384430892 | 0.297 | 0.124 | 7.05E-48  | 10 SSX2IP      |
| 8.02E-60  | 0.384055849 | 0.393 | 0.165 | 2.57E-55  | 10 SLC17A3     |
| 1.47E-35  | 0.383714848 | 0.384 | 0.204 | 4.73E-31  | 10 LINC01239   |
| 1.69E-20  | 0.383424737 | 0.462 | 0.327 | 5.43E-16  | 10 PISD        |
| 5.82E-26  | 0.382119147 | 0.676 | 0.549 | 1.87E-21  | 10 ANKIB1      |
| 4.98E-23  | 0.382114996 | 0.791 | 0.688 | 1.60E-18  | 10 FHOD3       |

|           |             |       |       |             |                 |
|-----------|-------------|-------|-------|-------------|-----------------|
| 4.43E-21  | 0.381388307 | 0.6   | 0.471 | 1.42E-16    | 10 ETV6         |
| 9.69E-68  | 0.380446786 | 0.275 | 0.095 | 3.11E-63    | 10 OR2T11       |
| 4.82E-29  | 0.377696508 | 0.804 | 0.68  | 1.55E-24    | 10 ABLIM1       |
| 1.76E-34  | 0.377373066 | 0.418 | 0.24  | 5.66E-30    | 10 AC127526.3   |
| 4.42E-45  | 0.37603007  | 0.383 | 0.194 | 1.42E-40    | 10 FANK1        |
| 6.04E-06  | 0.375374523 | 0.427 | 0.361 | 0.194123829 | 10 HSP90AA1     |
| 3.31E-37  | 0.374544514 | 0.698 | 0.498 | 1.06E-32    | 10 MIA2         |
| 1.27E-20  | 0.374433131 | 0.441 | 0.297 | 4.09E-16    | 10 5-8S-rRNA    |
| 6.57E-34  | 0.374331344 | 0.428 | 0.25  | 2.11E-29    | 10 TRAF3        |
| 2.57E-31  | 0.373586341 | 0.415 | 0.248 | 8.24E-27    | 10 DTX2P1-UPK3B |
| 2.21E-34  | 0.373422046 | 0.695 | 0.544 | 7.11E-30    | 10 PDLIM5       |
| 7.70E-24  | 0.373399945 | 0.451 | 0.306 | 2.47E-19    | 10 NDFIP2       |
| 5.02E-45  | 0.37323221  | 0.466 | 0.252 | 1.61E-40    | 10 CNTN3        |
| 1.69E-13  | 0.37296068  | 0.459 | 0.354 | 5.44E-09    | 10 NRIP1        |
| 3.64E-62  | 0.371889391 | 0.292 | 0.112 | 1.17E-57    | 10 AC127526.1   |
| 5.44E-137 | 0.371196222 | 0.259 | 0.054 | 1.75E-132   | 10 PDLIM1       |
| 5.14E-31  | 0.370684762 | 0.381 | 0.22  | 1.65E-26    | 10 CNDP2        |
| 5.27E-29  | 0.370265465 | 0.479 | 0.305 | 1.69E-24    | 10 ZNF69        |
| 1.51E-12  | 0.370149145 | 0.466 | 0.369 | 4.85E-08    | 10 ZBTB38       |
| 2.98E-26  | 0.36833468  | 0.353 | 0.208 | 9.57E-22    | 10 REPS2        |
| 4.70E-43  | 0.367123606 | 0.564 | 0.366 | 1.51E-38    | 10 IQCJ-SCHIP1  |
| 2.69E-61  | 0.366489599 | 0.261 | 0.095 | 8.64E-57    | 10 KDM1B        |
| 1.59E-21  | 0.366168882 | 0.305 | 0.182 | 5.12E-17    | 10 OR7E14P      |
| 1.90E-29  | 0.365735236 | 0.735 | 0.592 | 6.10E-25    | 10 EML4         |
| 6.24E-25  | 0.365403818 | 0.58  | 0.411 | 2.01E-20    | 10 DNAH7        |
| 2.89E-18  | 0.365317622 | 0.275 | 0.17  | 9.28E-14    | 10 TBC1D8B      |
| 1.74E-15  | 0.365020854 | 0.75  | 0.671 | 5.59E-11    | 10 PDE8A        |
| 2.08E-20  | 0.364132875 | 0.488 | 0.349 | 6.67E-16    | 10 FBXL2        |
| 1.38E-34  | 0.363720073 | 0.597 | 0.402 | 4.43E-30    | 10 MTFR1        |
| 1.18E-32  | 0.363147967 | 0.49  | 0.311 | 3.78E-28    | 10 RPS6KA3      |
| 6.67E-21  | 0.361706319 | 0.58  | 0.442 | 2.14E-16    | 10 PHF14        |
| 4.37E-21  | 0.361358454 | 0.617 | 0.502 | 1.40E-16    | 10 GTF2I        |
| 4.25E-34  | 0.360597735 | 0.316 | 0.167 | 1.36E-29    | 10 TSPAN12      |
| 6.91E-28  | 0.360570781 | 0.678 | 0.522 | 2.22E-23    | 10 IFT88        |
| 2.22E-27  | 0.360205088 | 0.525 | 0.361 | 7.14E-23    | 10 SMG1P1       |
| 1.20E-18  | 0.359714035 | 0.761 | 0.659 | 3.87E-14    | 10 RNF213       |
| 5.13E-30  | 0.359564646 | 0.458 | 0.288 | 1.65E-25    | 10 CTTN         |
| 6.45E-42  | 0.359334573 | 0.695 | 0.515 | 2.07E-37    | 10 RASAL2       |
| 1.78E-42  | 0.358561645 | 0.282 | 0.126 | 5.73E-38    | 10 LINC01550    |
| 5.86E-21  | 0.358013588 | 0.669 | 0.552 | 1.88E-16    | 10 RUFY3        |
| 2.66E-29  | 0.35774081  | 0.416 | 0.251 | 8.55E-25    | 10 ELOVL5       |
| 2.69E-57  | 0.356887104 | 0.268 | 0.099 | 8.65E-53    | 10 ZNF521       |
| 8.35E-44  | 0.356270308 | 0.513 | 0.292 | 2.68E-39    | 10 TM7SF3       |
| 3.54E-18  | 0.356110654 | 0.605 | 0.485 | 1.14E-13    | 10 SLC44A3-AS1  |
| 1.67E-56  | 0.354881597 | 0.729 | 0.417 | 5.36E-52    | 10 SLC16A12     |
| 3.37E-49  | 0.354582956 | 0.914 | 0.78  | 1.08E-44    | 10 GLIS3        |
| 1.31E-29  | 0.353948717 | 0.71  | 0.544 | 4.20E-25    | 10 PRICKLE2     |
| 1.14E-11  | 0.352837122 | 0.52  | 0.422 | 3.67E-07    | 10 BICD1        |
| 6.15E-29  | 0.352332788 | 0.424 | 0.25  | 1.97E-24    | 10 LINC00671    |
| 2.59E-62  | 0.351532839 | 0.29  | 0.108 | 8.33E-58    | 10 AFAP1        |
| 1.86E-41  | 0.349990592 | 0.444 | 0.243 | 5.98E-37    | 10 CERS4        |

|           |             |       |       |           |                  |
|-----------|-------------|-------|-------|-----------|------------------|
| 3.11E-48  | 0.349769849 | 0.258 | 0.104 | 9.99E-44  | 10 WASF1         |
| 2.61E-37  | 0.348997913 | 0.456 | 0.26  | 8.37E-33  | 10 CRYZL2P-SEC10 |
| 1.46E-24  | 0.348715345 | 0.539 | 0.38  | 4.69E-20  | 10 TTC7B         |
| 2.40E-39  | 0.348118789 | 0.334 | 0.164 | 7.71E-35  | 10 ANXA2         |
| 3.88E-38  | 0.347624679 | 0.368 | 0.194 | 1.24E-33  | 10 NIT2          |
| 4.35E-20  | 0.347006877 | 0.75  | 0.641 | 1.40E-15  | 10 RAPGEF2       |
| 8.03E-33  | 0.346652047 | 0.307 | 0.159 | 2.58E-28  | 10 PTPRF         |
| 2.05E-116 | 0.346285213 | 0.704 | 0.286 | 6.59E-112 | 10 FTCD          |
| 6.24E-27  | 0.344082988 | 0.29  | 0.153 | 2.00E-22  | 10 HDAC9         |
| 1.97E-73  | 0.344029469 | 0.291 | 0.099 | 6.32E-69  | 10 SCN8A         |
| 1.26E-22  | 0.341968166 | 0.418 | 0.272 | 4.05E-18  | 10 PFKP          |
| 1.09E-20  | 0.341956631 | 0.469 | 0.327 | 3.52E-16  | 10 SFMBT1        |
| 9.48E-49  | 0.341750555 | 0.344 | 0.157 | 3.04E-44  | 10 IL15          |
| 8.35E-23  | 0.340584634 | 0.776 | 0.679 | 2.68E-18  | 10 HNRNPC        |
| 6.63E-28  | 0.340519678 | 0.974 | 0.963 | 2.13E-23  | 10 NEAT1         |
| 2.19E-14  | 0.340472045 | 0.342 | 0.239 | 7.04E-10  | 10 AC090912.1    |
| 2.77E-33  | 0.340410913 | 0.852 | 0.785 | 8.91E-29  | 10 NPIPB3        |
| 4.54E-21  | 0.34029765  | 0.725 | 0.638 | 1.46E-16  | 10 MLLT10        |
| 4.95E-19  | 0.33884156  | 0.625 | 0.512 | 1.59E-14  | 10 TRIM44        |
| 1.28E-56  | 0.338578057 | 0.282 | 0.109 | 4.11E-52  | 10 SLC16A1-AS1   |
| 1.22E-12  | 0.338383231 | 0.718 | 0.666 | 3.91E-08  | 10 DENND1A       |
| 6.49E-23  | 0.33786332  | 0.529 | 0.375 | 2.08E-18  | 10 CACNA2D1      |
| 1.09E-32  | 0.337725602 | 0.271 | 0.134 | 3.49E-28  | 10 GRTP1         |
| 2.64E-22  | 0.337611657 | 0.614 | 0.468 | 8.47E-18  | 10 EPB41L1       |
| 1.02E-41  | 0.33698281  | 0.331 | 0.161 | 3.28E-37  | 10 RAB8B         |
| 1.40E-21  | 0.336912553 | 0.504 | 0.359 | 4.49E-17  | 10 IFT43         |
| 6.50E-19  | 0.336589126 | 0.694 | 0.566 | 2.09E-14  | 10 CFLAR         |
| 9.08E-18  | 0.335561999 | 0.633 | 0.53  | 2.92E-13  | 10 PTBP2         |
| 9.38E-28  | 0.335051022 | 0.557 | 0.382 | 3.01E-23  | 10 SMG1P4        |
| 4.79E-23  | 0.333398278 | 0.399 | 0.263 | 1.54E-18  | 10 LEPROT        |
| 1.61E-27  | 0.332760539 | 0.519 | 0.35  | 5.18E-23  | 10 ATP6V0A1      |
| 6.43E-26  | 0.332703845 | 0.407 | 0.25  | 2.07E-21  | 10 LIPA          |
| 8.02E-22  | 0.332563477 | 0.672 | 0.551 | 2.58E-17  | 10 ARHGAP29      |
| 2.22E-20  | 0.33241845  | 0.655 | 0.522 | 7.12E-16  | 10 FANCC         |
| 3.88E-52  | 0.331294084 | 0.338 | 0.152 | 1.25E-47  | 10 FP700111.1    |
| 8.53E-33  | 0.330720175 | 0.327 | 0.167 | 2.74E-28  | 10 SLC25A48      |
| 2.27E-25  | 0.329157129 | 0.403 | 0.257 | 7.30E-21  | 10 ATP6V1C1      |
| 6.76E-42  | 0.328689284 | 0.336 | 0.163 | 2.17E-37  | 10 SRP54-AS1     |
| 2.21E-22  | 0.328640449 | 0.462 | 0.309 | 7.09E-18  | 10 MOK           |
| 1.71E-14  | 0.327864774 | 0.446 | 0.334 | 5.48E-10  | 10 MTMR12        |
| 2.14E-32  | 0.327409566 | 0.473 | 0.292 | 6.88E-28  | 10 LMTK2         |
| 4.19E-26  | 0.327202753 | 0.298 | 0.166 | 1.35E-21  | 10 NREP          |
| 1.49E-32  | 0.327090434 | 0.429 | 0.249 | 4.80E-28  | 10 SLC22A5       |
| 4.72E-26  | 0.325573607 | 0.379 | 0.229 | 1.51E-21  | 10 TBC1D16       |
| 3.12E-27  | 0.325392859 | 0.501 | 0.329 | 1.00E-22  | 10 SPRED1        |
| 2.10E-42  | 0.325259172 | 0.272 | 0.119 | 6.76E-38  | 10 EPSTI1        |
| 6.55E-30  | 0.324948295 | 0.491 | 0.316 | 2.10E-25  | 10 PARP14        |
| 3.53E-33  | 0.324629489 | 0.411 | 0.235 | 1.13E-28  | 10 EVA1C         |
| 7.57E-25  | 0.324214161 | 0.384 | 0.238 | 2.43E-20  | 10 CRLS1         |
| 4.84E-28  | 0.323908684 | 0.379 | 0.222 | 1.55E-23  | 10 AC019257.8    |
| 2.14E-16  | 0.321540468 | 0.934 | 0.892 | 6.87E-12  | 10 RORA          |

|          |             |       |       |             |                 |
|----------|-------------|-------|-------|-------------|-----------------|
| 6.03E-27 | 0.321235304 | 0.324 | 0.182 | 1.94E-22    | 10 NEDD9        |
| 2.21E-19 | 0.321083607 | 0.51  | 0.373 | 7.09E-15    | 10 HMGN3        |
| 4.18E-31 | 0.320156963 | 0.475 | 0.303 | 1.34E-26    | 10 NBPF9        |
| 2.06E-20 | 0.319021128 | 0.877 | 0.834 | 6.61E-16    | 10 MBD5         |
| 7.81E-16 | 0.318416172 | 0.527 | 0.411 | 2.51E-11    | 10 PPFIA1       |
| 2.47E-20 | 0.318162906 | 0.358 | 0.23  | 7.93E-16    | 10 ZNF721       |
| 1.53E-25 | 0.317735432 | 0.681 | 0.518 | 4.91E-21    | 10 ANKRD36      |
| 1.35E-24 | 0.317009762 | 0.372 | 0.224 | 4.33E-20    | 10 AGPAT5       |
| 2.34E-25 | 0.316871531 | 0.709 | 0.566 | 7.52E-21    | 10 TAF1D        |
| 2.75E-18 | 0.316298474 | 0.693 | 0.614 | 8.83E-14    | 10 PUM1         |
| 4.83E-30 | 0.315107991 | 0.788 | 0.692 | 1.55E-25    | 10 AKAP13       |
| 1.80E-19 | 0.314360299 | 0.414 | 0.274 | 5.77E-15    | 10 GPR39        |
| 1.15E-42 | 0.314141214 | 0.297 | 0.135 | 3.69E-38    | 10 ACADL        |
| 9.97E-28 | 0.313922783 | 0.36  | 0.21  | 3.20E-23    | 10 ENO1         |
| 6.77E-20 | 0.313515344 | 0.509 | 0.373 | 2.17E-15    | 10 DERA         |
| 1.87E-27 | 0.313500484 | 0.827 | 0.769 | 6.01E-23    | 10 NPIPB5       |
| 2.20E-20 | 0.313130014 | 0.574 | 0.424 | 7.07E-16    | 10 MGMT         |
| 1.02E-59 | 0.312800035 | 0.265 | 0.095 | 3.27E-55    | 10 ABCC6P1      |
| 6.49E-25 | 0.312669665 | 0.402 | 0.247 | 2.08E-20    | 10 PACS2        |
| 1.99E-18 | 0.312651726 | 0.457 | 0.318 | 6.38E-14    | 10 AC104123.1   |
| 1.02E-11 | 0.311372522 | 0.3   | 0.206 | 3.28E-07    | 10 MAOA         |
| 6.50E-17 | 0.311367848 | 0.587 | 0.457 | 2.09E-12    | 10 LINC00894    |
| 1.82E-21 | 0.311348342 | 0.408 | 0.269 | 5.84E-17    | 10 MTMR2        |
| 1.26E-32 | 0.311196474 | 0.447 | 0.268 | 4.04E-28    | 10 UTP4         |
| 1.73E-33 | 0.30959699  | 0.379 | 0.212 | 5.57E-29    | 10 LRRC6        |
| 2.04E-26 | 0.309168683 | 0.544 | 0.366 | 6.54E-22    | 10 DLEU2        |
| 4.90E-62 | 0.30912368  | 0.267 | 0.095 | 1.58E-57    | 10 CNTNAP3C     |
| 8.72E-38 | 0.308498523 | 0.444 | 0.243 | 2.80E-33    | 10 FAM20C       |
| 1.73E-16 | 0.30806513  | 0.556 | 0.434 | 5.55E-12    | 10 SETD3        |
| 3.89E-13 | 0.307300105 | 0.342 | 0.239 | 1.25E-08    | 10 AC018521.1   |
| 2.53E-06 | 0.306896102 | 0.36  | 0.29  | 0.081322615 | 10 AHNAK        |
| 1.48E-19 | 0.306536791 | 0.582 | 0.44  | 4.76E-15    | 10 RFX7         |
| 2.24E-18 | 0.305462351 | 0.494 | 0.364 | 7.19E-14    | 10 KIAA1671     |
| 9.36E-24 | 0.304596163 | 0.498 | 0.339 | 3.01E-19    | 10 CCDC57       |
| 2.82E-24 | 0.304183838 | 0.399 | 0.251 | 9.05E-20    | 10 SMC6         |
| 1.22E-12 | 0.30384919  | 0.617 | 0.526 | 3.92E-08    | 10 AF117829.1   |
| 4.11E-05 | 0.303166495 | 0.446 | 0.411 | 1           | 10 TTTY14       |
| 2.74E-13 | 0.30308204  | 0.535 | 0.423 | 8.79E-09    | 10 ANO10        |
| 1.07E-37 | 0.302925353 | 0.351 | 0.178 | 3.44E-33    | 10 MAOB         |
| 1.04E-19 | 0.302241162 | 0.495 | 0.351 | 3.34E-15    | 10 EFCAB6       |
| 6.58E-28 | 0.301927624 | 0.314 | 0.174 | 2.11E-23    | 10 OTULIN       |
| 5.89E-21 | 0.30142201  | 0.409 | 0.263 | 1.89E-16    | 10 MYO15B       |
| 3.03E-15 | 0.30062348  | 0.634 | 0.553 | 9.74E-11    | 10 SLMAP        |
| 4.90E-28 | 0.300489479 | 0.332 | 0.186 | 1.57E-23    | 10 DNAAF4-CCPG1 |
| 3.87E-20 | 0.299686743 | 0.855 | 0.799 | 1.24E-15    | 10 SOX6         |
| 4.52E-25 | 0.299531375 | 0.269 | 0.139 | 1.45E-20    | 10 AC087762.1   |
| 3.63E-22 | 0.299456793 | 0.257 | 0.145 | 1.17E-17    | 10 ZNF189       |
| 3.20E-20 | 0.297747957 | 0.387 | 0.254 | 1.03E-15    | 10 NOVA1        |
| 8.10E-26 | 0.297580939 | 0.511 | 0.344 | 2.60E-21    | 10 ABHD15-AS1   |
| 1.49E-12 | 0.297336139 | 0.723 | 0.676 | 4.79E-08    | 10 DLG1         |
| 1.80E-17 | 0.297286189 | 0.432 | 0.305 | 5.77E-13    | 10 DENND5A      |



|          |             |       |       |             |               |
|----------|-------------|-------|-------|-------------|---------------|
| 5.48E-30 | 0.296827754 | 0.362 | 0.206 | 1.76E-25    | 10 EVC2       |
| 6.72E-33 | 0.29654159  | 0.3   | 0.15  | 2.16E-28    | 10 EAF2       |
| 1.94E-30 | 0.296097195 | 0.254 | 0.123 | 6.24E-26    | 10 KCP        |
| 7.14E-35 | 0.295859567 | 0.261 | 0.123 | 2.29E-30    | 10 TNFRSF1A   |
| 1.01E-30 | 0.295628932 | 0.334 | 0.18  | 3.26E-26    | 10 ERBB3      |
| 2.10E-12 | 0.295307994 | 0.639 | 0.524 | 6.76E-08    | 10 GOLGA8B    |
| 6.24E-20 | 0.294736764 | 0.691 | 0.569 | 2.00E-15    | 10 AC008695.1 |
| 2.74E-30 | 0.294657486 | 0.414 | 0.248 | 8.81E-26    | 10 PARP8      |
| 7.47E-19 | 0.293943459 | 0.838 | 0.769 | 2.40E-14    | 10 IGF1R      |
| 1.08E-15 | 0.293935756 | 0.276 | 0.174 | 3.45E-11    | 10 LTBP3      |
| 1.62E-19 | 0.292293529 | 0.417 | 0.28  | 5.21E-15    | 10 TRMT11     |
| 3.85E-22 | 0.291630796 | 0.448 | 0.302 | 1.24E-17    | 10 CFAP69     |
| 1.96E-21 | 0.291172736 | 0.397 | 0.262 | 6.29E-17    | 10 UBE2Q2P2   |
| 1.43E-17 | 0.29068248  | 0.621 | 0.503 | 4.60E-13    | 10 ABCD3      |
| 6.68E-18 | 0.288796826 | 0.621 | 0.504 | 2.15E-13    | 10 PHACTR4    |
| 4.61E-19 | 0.28812476  | 0.619 | 0.491 | 1.48E-14    | 10 GNB1       |
| 1.27E-38 | 0.287826054 | 0.268 | 0.121 | 4.07E-34    | 10 PHLDB1     |
| 4.14E-15 | 0.287212427 | 0.505 | 0.374 | 1.33E-10    | 10 PLXNB1     |
| 1.36E-62 | 0.28717402  | 0.404 | 0.166 | 4.37E-58    | 10 DPEP1      |
| 1.30E-17 | 0.286908337 | 0.658 | 0.556 | 4.17E-13    | 10 RBM33      |
| 2.11E-19 | 0.286153549 | 0.542 | 0.4   | 6.76E-15    | 10 NBPF12     |
| 1.19E-25 | 0.285354696 | 0.381 | 0.229 | 3.83E-21    | 10 MREG       |
| 1.79E-21 | 0.284933538 | 0.431 | 0.283 | 5.76E-17    | 10 ACSS2      |
| 1.61E-27 | 0.284433576 | 0.353 | 0.203 | 5.18E-23    | 10 PECR       |
| 1.42E-15 | 0.28334582  | 0.6   | 0.476 | 4.57E-11    | 10 GOLM2      |
| 2.31E-25 | 0.282280316 | 0.401 | 0.248 | 7.42E-21    | 10 NBPF15     |
| 3.33E-23 | 0.281964652 | 0.349 | 0.208 | 1.07E-18    | 10 SNTB2      |
| 5.56E-18 | 0.280695022 | 0.351 | 0.232 | 1.79E-13    | 10 DNAJC15    |
| 7.42E-31 | 0.280450169 | 0.635 | 0.417 | 2.38E-26    | 10 STK32B     |
| 6.36E-09 | 0.28016122  | 0.338 | 0.256 | 0.000204108 | 10 ADGRG1     |
| 1.98E-18 | 0.279820629 | 0.534 | 0.398 | 6.36E-14    | 10 STX7       |
| 7.59E-21 | 0.279677399 | 0.441 | 0.295 | 2.44E-16    | 10 CEMIP2     |
| 2.28E-17 | 0.279512832 | 0.448 | 0.315 | 7.32E-13    | 10 GTDC1      |
| 2.96E-14 | 0.279388388 | 0.66  | 0.553 | 9.50E-10    | 10 AIG1       |
| 1.16E-16 | 0.278731035 | 0.734 | 0.657 | 3.72E-12    | 10 APP        |
| 5.91E-14 | 0.278687875 | 0.492 | 0.38  | 1.90E-09    | 10 DDX10      |
| 2.07E-21 | 0.27863001  | 0.305 | 0.18  | 6.63E-17    | 10 IL1R1      |
| 4.29E-13 | 0.276591295 | 0.757 | 0.674 | 1.38E-08    | 10 SHROOM3    |
| 2.10E-26 | 0.276477681 | 0.282 | 0.154 | 6.74E-22    | 10 LAMP2      |
| 1.34E-06 | 0.276321419 | 0.483 | 0.41  | 0.043098861 | 10 ERRFI1     |
| 5.46E-14 | 0.276168018 | 0.471 | 0.346 | 1.75E-09    | 10 CRPPA      |
| 1.31E-17 | 0.274927545 | 0.543 | 0.417 | 4.22E-13    | 10 GTF2IP4    |
| 2.83E-17 | 0.274036839 | 0.425 | 0.297 | 9.09E-13    | 10 FOXK1      |
| 1.18E-31 | 0.273596309 | 0.293 | 0.15  | 3.79E-27    | 10 KATNAL1    |
| 4.02E-13 | 0.273448096 | 0.454 | 0.339 | 1.29E-08    | 10 MTAP       |
| 1.75E-20 | 0.27338589  | 0.578 | 0.428 | 5.61E-16    | 10 CPNE8      |
| 1.03E-13 | 0.273120505 | 0.504 | 0.395 | 3.32E-09    | 10 PTAR1      |
| 2.13E-45 | 0.273117999 | 0.296 | 0.127 | 6.83E-41    | 10 BX005040.4 |
| 2.49E-14 | 0.272782729 | 0.62  | 0.504 | 7.99E-10    | 10 TPT1-AS1   |
| 1.63E-18 | 0.272536993 | 0.554 | 0.405 | 5.24E-14    | 10 DMXL2      |
| 3.19E-16 | 0.272350974 | 0.565 | 0.426 | 1.02E-11    | 10 SPG7       |

|            |             |       |       |          |               |
|------------|-------------|-------|-------|----------|---------------|
| 1.73E-35   | 0.272123018 | 0.474 | 0.268 | 5.56E-31 | 10 BHMT2      |
| 5.46E-15   | 0.272115409 | 0.667 | 0.571 | 1.75E-10 | 10 SSH2       |
| 4.30E-19   | 0.271971885 | 0.871 | 0.829 | 1.38E-14 | 10 MACF1      |
| 2.08E-22   | 0.271836713 | 0.555 | 0.413 | 6.68E-18 | 10 GNG12      |
| 0.00718054 | 0.271650878 | 0.24  | 0.281 | 1        | 10 ZNF385D    |
| 3.97E-17   | 0.27149217  | 0.275 | 0.17  | 1.28E-12 | 10 RFX2       |
| 3.09E-22   | 0.271309417 | 0.703 | 0.537 | 9.93E-18 | 10 PAX2       |
| 2.16E-16   | 0.270777549 | 0.574 | 0.431 | 6.95E-12 | 10 AL078459.1 |
| 1.24E-15   | 0.270381676 | 0.415 | 0.293 | 3.98E-11 | 10 DLGAP4     |
| 4.64E-28   | 0.269105127 | 0.577 | 0.391 | 1.49E-23 | 10 PITPNC1    |
| 3.01E-10   | 0.268969425 | 0.673 | 0.581 | 9.66E-06 | 10 SRSF11     |
| 2.60E-53   | 0.267738365 | 0.256 | 0.096 | 8.36E-49 | 10 RRN3P1     |
| 3.32E-37   | 0.267171771 | 0.271 | 0.125 | 1.07E-32 | 10 C1RL       |
| 1.58E-15   | 0.267052398 | 0.493 | 0.372 | 5.08E-11 | 10 CU633904.1 |
| 4.08E-18   | 0.266978078 | 0.569 | 0.42  | 1.31E-13 | 10 IL6ST      |
| 7.29E-21   | 0.266776916 | 0.375 | 0.238 | 2.34E-16 | 10 AC092902.4 |
| 3.57E-12   | 0.266636991 | 0.688 | 0.591 | 1.15E-07 | 10 LYPLAL1    |
| 8.41E-21   | 0.266455382 | 0.814 | 0.769 | 2.70E-16 | 10 NPIPB4     |
| 2.17E-13   | 0.265846122 | 0.631 | 0.503 | 6.96E-09 | 10 MIR3936HG  |
| 5.31E-21   | 0.2654059   | 0.354 | 0.218 | 1.71E-16 | 10 SPAG17     |
| 6.06E-23   | 0.264745849 | 0.349 | 0.21  | 1.95E-18 | 10 C12orf40   |
| 1.74E-21   | 0.264562556 | 0.388 | 0.242 | 5.59E-17 | 10 AC012531.3 |
| 2.28E-53   | 0.264441941 | 0.302 | 0.123 | 7.31E-49 | 10 MEIS1      |
| 9.30E-12   | 0.264123596 | 0.544 | 0.445 | 2.99E-07 | 10 UBAP1      |
| 6.86E-37   | 0.263683624 | 0.264 | 0.121 | 2.20E-32 | 10 SLC25A43   |
| 1.22E-36   | 0.26340344  | 0.32  | 0.157 | 3.93E-32 | 10 TENM2      |
| 1.27E-50   | 0.263400918 | 0.445 | 0.219 | 4.08E-46 | 10 SLC4A7     |
| 2.05E-12   | 0.26322094  | 0.274 | 0.182 | 6.58E-08 | 10 AP002518.2 |
| 7.32E-16   | 0.262897585 | 0.434 | 0.309 | 2.35E-11 | 10 TCF20      |
| 3.84E-19   | 0.262184828 | 0.329 | 0.203 | 1.23E-14 | 10 PTTG1IP    |
| 7.27E-17   | 0.262047548 | 0.305 | 0.189 | 2.33E-12 | 10 PRELID2    |
| 3.92E-17   | 0.261794875 | 0.309 | 0.198 | 1.26E-12 | 10 PGAM1P5    |
| 7.30E-12   | 0.261676614 | 0.654 | 0.561 | 2.35E-07 | 10 SNX14      |
| 8.50E-17   | 0.261497097 | 0.82  | 0.805 | 2.73E-12 | 10 EXOC4      |
| 8.14E-28   | 0.261413871 | 0.336 | 0.188 | 2.61E-23 | 10 AL160269.1 |
| 1.53E-27   | 0.260631365 | 0.526 | 0.351 | 4.93E-23 | 10 SRGAP1     |
| 3.87E-11   | 0.260137584 | 0.299 | 0.21  | 1.24E-06 | 10 TLE1       |
| 6.26E-24   | 0.259895552 | 0.344 | 0.203 | 2.01E-19 | 10 MEI4       |
| 3.04E-19   | 0.259274003 | 0.448 | 0.313 | 9.78E-15 | 10 KHDRBS1    |
| 6.00E-17   | 0.259224246 | 0.457 | 0.322 | 1.93E-12 | 10 SPEF2      |
| 1.48E-64   | 0.258933566 | 0.335 | 0.126 | 4.76E-60 | 10 SLC17A4    |
| 2.39E-47   | 0.25845068  | 0.274 | 0.11  | 7.68E-43 | 10 AC004485.1 |
| 2.34E-12   | 0.257491894 | 0.553 | 0.437 | 7.50E-08 | 10 AF127577.4 |
| 2.00E-10   | 0.257062552 | 0.573 | 0.489 | 6.43E-06 | 10 CSNK1G1    |
| 2.01E-12   | 0.256716712 | 0.459 | 0.348 | 6.46E-08 | 10 GABPB1-AS1 |
| 3.02E-35   | 0.256014631 | 0.26  | 0.12  | 9.69E-31 | 10 DRAM1      |
| 4.43E-16   | 0.255354836 | 0.374 | 0.254 | 1.42E-11 | 10 MTHFD1L    |
| 7.51E-18   | 0.255342944 | 0.43  | 0.298 | 2.41E-13 | 10 PAK2       |
| 4.40E-21   | 0.255316295 | 0.32  | 0.192 | 1.41E-16 | 10 RPS6KA5    |
| 1.44E-22   | 0.254643412 | 0.362 | 0.219 | 4.62E-18 | 10 TLE4       |
| 1.62E-19   | 0.254320713 | 0.433 | 0.292 | 5.19E-15 | 10 CCDC6      |

|           |             |       |       |             |               |
|-----------|-------------|-------|-------|-------------|---------------|
| 1.06E-09  | 0.254131503 | 0.413 | 0.313 | 3.41E-05    | 10 SLC25A37   |
| 1.08E-12  | 0.253730617 | 0.448 | 0.338 | 3.48E-08    | 10 SPART      |
| 3.20E-12  | 0.253253878 | 0.664 | 0.575 | 1.03E-07    | 10 AFF4       |
| 1.88E-17  | 0.253132817 | 0.377 | 0.248 | 6.04E-13    | 10 AC006994.1 |
| 6.15E-24  | 0.25258677  | 0.298 | 0.168 | 1.98E-19    | 10 SNX7       |
| 2.80E-15  | 0.251749286 | 0.371 | 0.255 | 9.00E-11    | 10 C11orf54   |
| 2.11E-14  | 0.25135182  | 0.522 | 0.398 | 6.76E-10    | 10 LARP1B     |
| 2.60E-20  | 0.25068817  | 0.254 | 0.142 | 8.34E-16    | 10 SHISA6     |
| 5.43E-08  | 0.250610888 | 0.588 | 0.518 | 0.001745118 | 10 ADAM10     |
| 5.80E-08  | 0.250559296 | 0.656 | 0.58  | 0.001862808 | 10 GCC2       |
| 1.69E-19  | 0.250367597 | 0.291 | 0.175 | 5.44E-15    | 10 PTPN20     |
| 5.17E-20  | 0.250011089 | 0.321 | 0.195 | 1.66E-15    | 10 LRIG3      |
| 0         | 3.022480498 | 0.874 | 0.169 | 0           | 11 PWRN1      |
| 0         | 2.884426459 | 0.982 | 0.607 | 0           | 11 PDE10A     |
| 0         | 2.494331448 | 0.983 | 0.323 | 0           | 11 BMPR1B     |
| 0         | 2.452797979 | 0.933 | 0.322 | 0           | 11 PAPP A     |
| 0         | 2.396229128 | 0.94  | 0.326 | 0           | 11 ST6GAL1    |
| 0         | 2.295021521 | 0.86  | 0.111 | 0           | 11 SCNN1G     |
| 0         | 2.284886321 | 0.974 | 0.37  | 0           | 11 TOX        |
| 0         | 2.166464249 | 0.991 | 0.583 | 0           | 11 PRKAG2     |
| 0         | 2.155840498 | 0.562 | 0.091 | 0           | 11 FGF12      |
| 0         | 2.133823071 | 0.823 | 0.141 | 0           | 11 EYA4       |
| 0         | 2.100407958 | 0.897 | 0.251 | 0           | 11 KSR2       |
| 0         | 1.978057467 | 0.807 | 0.139 | 0           | 11 LINC01482  |
| 1.12E-306 | 1.974414005 | 0.515 | 0.111 | 3.59E-302   | 11 H2AC6      |
| 4.07E-166 | 1.957948601 | 0.517 | 0.181 | 1.31E-161   | 11 ZNF331     |
| 0         | 1.940079908 | 0.96  | 0.525 | 0           | 11 ABTB2      |
| 0         | 1.915888756 | 0.993 | 0.533 | 0           | 11 GRIP1      |
| 0         | 1.896723112 | 0.818 | 0.094 | 0           | 11 AQP2       |
| 6.26E-223 | 1.879940122 | 0.716 | 0.293 | 2.01E-218   | 11 ATP1B3     |
| 0         | 1.870689297 | 0.755 | 0.072 | 0           | 11 ROR2       |
| 0         | 1.830527348 | 0.748 | 0.054 | 0           | 11 FXYD4      |
| 0         | 1.807447148 | 0.998 | 0.682 | 0           | 11 CADPS2     |
| 0         | 1.794618462 | 0.75  | 0.168 | 0           | 11 BTG2       |
| 0         | 1.793682228 | 0.936 | 0.418 | 0           | 11 PLCL2      |
| 0         | 1.788829787 | 0.863 | 0.172 | 0           | 11 GATA3      |
| 0         | 1.788177766 | 0.998 | 0.597 | 0           | 11 TRPM3      |
| 0         | 1.761906914 | 0.863 | 0.327 | 0           | 11 SLC38A1    |
| 0         | 1.735681827 | 0.948 | 0.427 | 0           | 11 C11orf80   |
| 0         | 1.726774034 | 0.804 | 0.299 | 0           | 11 SLC45A4    |
| 0         | 1.6909409   | 0.934 | 0.411 | 0           | 11 TMTC2      |
| 0         | 1.664935367 | 0.9   | 0.298 | 0           | 11 MACC1      |
| 0         | 1.642069784 | 0.584 | 0.084 | 0           | 11 EGFEM1P    |
| 0         | 1.619851285 | 0.677 | 0.162 | 0           | 11 ZC3HAV1    |
| 0         | 1.605191293 | 0.996 | 0.786 | 0           | 11 RBPMS      |
| 0         | 1.596159785 | 0.849 | 0.261 | 0           | 11 PLEKHA2    |
| 0         | 1.592790345 | 1     | 0.772 | 0           | 11 MECOM      |
| 9.07E-245 | 1.587803165 | 0.314 | 0.049 | 2.91E-240   | 11 H2AC18     |
| 1.08E-69  | 1.584345116 | 0.366 | 0.157 | 3.48E-65    | 11 SGCD       |
| 0         | 1.537425932 | 0.964 | 0.396 | 0           | 11 PIK3C2G    |
| 9.47E-244 | 1.49619062  | 0.731 | 0.261 | 3.04E-239   | 11 KCTD8      |

|           |             |       |       |           |               |
|-----------|-------------|-------|-------|-----------|---------------|
| 0         | 1.491276294 | 1     | 0.973 | 0         | 11 PDE4D      |
| 3.00E-282 | 1.482335945 | 0.96  | 0.547 | 9.62E-278 | 11 MYO1E      |
| 2.94E-189 | 1.479093436 | 0.329 | 0.066 | 9.44E-185 | 11 PSG9       |
| 0         | 1.476982536 | 0.559 | 0.051 | 0         | 11 AQP3       |
| 0         | 1.465992266 | 0.305 | 0.027 | 0         | 11 AC087379.2 |
| 0         | 1.461579949 | 0.858 | 0.336 | 0         | 11 SGPP1      |
| 0         | 1.448204345 | 0.796 | 0.191 | 0         | 11 TCF7L1     |
| 1.45E-240 | 1.427752267 | 0.907 | 0.471 | 4.66E-236 | 11 NDRG1      |
| 1.94E-297 | 1.41742527  | 0.975 | 0.7   | 6.23E-293 | 11 ERC1       |
| 1.55E-258 | 1.414554374 | 0.896 | 0.394 | 4.97E-254 | 11 SCIN       |
| 4.05E-273 | 1.403396536 | 0.842 | 0.342 | 1.30E-268 | 11 STIM2      |
| 4.11E-265 | 1.401800479 | 0.991 | 0.777 | 1.32E-260 | 11 GLIS3      |
| 8.21E-265 | 1.387176762 | 0.623 | 0.182 | 2.64E-260 | 11 ARG2       |
| 3.12E-240 | 1.362446087 | 0.914 | 0.529 | 1.00E-235 | 11 SPAG16     |
| 1.11E-142 | 1.361005536 | 0.654 | 0.295 | 3.55E-138 | 11 IL1RAPL2   |
| 1.05E-278 | 1.356498924 | 0.905 | 0.359 | 3.37E-274 | 11 SOX5       |
| 2.27E-300 | 1.346074912 | 0.998 | 0.861 | 7.28E-296 | 11 ANK3       |
| 0         | 1.32166277  | 0.609 | 0.148 | 0         | 11 PGAP1      |
| 2.88E-294 | 1.32084003  | 0.612 | 0.154 | 9.25E-290 | 11 COL4A6     |
| 7.07E-230 | 1.318807656 | 0.983 | 0.698 | 2.27E-225 | 11 FRAS1      |
| 3.92E-284 | 1.313366935 | 0.933 | 0.421 | 1.26E-279 | 11 THSD4      |
| 0         | 1.304108029 | 0.71  | 0.2   | 0         | 11 EML6       |
| 0         | 1.292877328 | 0.837 | 0.255 | 0         | 11 FYB2       |
| 5.99E-222 | 1.281407111 | 0.547 | 0.152 | 1.92E-217 | 11 GDF15      |
| 2.14E-257 | 1.272850789 | 0.971 | 0.614 | 6.87E-253 | 11 LINC02532  |
| 0         | 1.272508575 | 0.639 | 0.087 | 0         | 11 SCNN1B     |
| 0         | 1.261716004 | 0.596 | 0.103 | 0         | 11 SLC9A4     |
| 2.29E-200 | 1.261368023 | 0.934 | 0.614 | 7.36E-196 | 11 GAREM1     |
| 0         | 1.259228562 | 0.563 | 0.122 | 0         | 11 ST3GAL4    |
| 6.90E-236 | 1.257747254 | 0.793 | 0.33  | 2.22E-231 | 11 MAP3K21    |
| 7.82E-261 | 1.249004717 | 0.543 | 0.129 | 2.51E-256 | 11 PCDH7      |
| 5.49E-238 | 1.244979867 | 0.949 | 0.52  | 1.76E-233 | 11 MYO10      |
| 1.24E-260 | 1.241734648 | 0.979 | 0.623 | 3.98E-256 | 11 AKT3       |
| 1.81E-229 | 1.241678821 | 0.839 | 0.387 | 5.82E-225 | 11 MYO5A      |
| 1.77E-256 | 1.238677013 | 0.901 | 0.401 | 5.67E-252 | 11 COL4A5     |
| 0         | 1.235357823 | 0.584 | 0.137 | 0         | 11 RDH10      |
| 2.49E-193 | 1.235334567 | 0.933 | 0.561 | 8.00E-189 | 11 RALYL      |
| 3.10E-247 | 1.228004643 | 0.881 | 0.431 | 9.94E-243 | 11 HDAC4      |
| 5.37E-296 | 1.225859044 | 0.783 | 0.279 | 1.72E-291 | 11 SLC11A2    |
| 4.89E-289 | 1.221262017 | 0.875 | 0.359 | 1.57E-284 | 11 CRYBG1     |
| 0         | 1.208294688 | 0.703 | 0.179 | 0         | 11 PFKFB3     |
| 2.10E-251 | 1.196197208 | 0.981 | 0.7   | 6.76E-247 | 11 PRKCA      |
| 0         | 1.184246185 | 0.716 | 0.167 | 0         | 11 HUNK       |
| 0         | 1.183956133 | 0.469 | 0.04  | 0         | 11 PKIA-AS1   |
| 6.44E-218 | 1.181770223 | 0.483 | 0.121 | 2.07E-213 | 11 SH3BP5     |
| 3.61E-168 | 1.17910847  | 0.967 | 0.671 | 1.16E-163 | 11 THSD7A     |
| 7.44E-198 | 1.172439083 | 0.944 | 0.577 | 2.39E-193 | 11 PDE7B      |
| 3.52E-304 | 1.165014142 | 0.633 | 0.16  | 1.13E-299 | 11 SLC7A1     |
| 1.49E-242 | 1.163702637 | 0.866 | 0.361 | 4.78E-238 | 11 FRY        |
| 2.58E-259 | 1.156582089 | 0.926 | 0.391 | 8.27E-255 | 11 MPPED2     |
| 3.33E-200 | 1.154274    | 0.97  | 0.763 | 1.07E-195 | 11 AFF1       |

|           |             |       |       |           |                 |
|-----------|-------------|-------|-------|-----------|-----------------|
| 1.29E-192 | 1.154023763 | 0.839 | 0.42  | 4.14E-188 | 11 SRGAP3       |
| 2.49E-306 | 1.151848114 | 0.686 | 0.199 | 8.01E-302 | 11 STAM         |
| 2.08E-100 | 1.140720113 | 0.39  | 0.146 | 6.70E-96  | 11 NUAQ2        |
| 1.35E-149 | 1.138453626 | 0.882 | 0.56  | 4.33E-145 | 11 WWTR1        |
| 8.14E-272 | 1.136402966 | 0.785 | 0.259 | 2.62E-267 | 11 NRCAM        |
| 1.60E-219 | 1.13634792  | 0.992 | 0.706 | 5.13E-215 | 11 ADAMTS9-AS2  |
| 1.95E-146 | 1.135220413 | 0.771 | 0.399 | 6.27E-142 | 11 CDK6         |
| 1.14E-194 | 1.131388419 | 0.632 | 0.223 | 3.67E-190 | 11 VEPH1        |
| 2.98E-195 | 1.12867303  | 0.943 | 0.558 | 9.56E-191 | 11 DCDC2        |
| 1.05E-213 | 1.127197145 | 0.896 | 0.486 | 3.38E-209 | 11 EYA3         |
| 7.83E-207 | 1.127186496 | 0.991 | 0.673 | 2.52E-202 | 11 KAZN         |
| 2.20E-215 | 1.11596896  | 0.699 | 0.244 | 7.05E-211 | 11 MSR1         |
| 0         | 1.113695319 | 0.496 | 0.079 | 0         | 11 PNP          |
| 9.43E-207 | 1.110304613 | 0.944 | 0.569 | 3.03E-202 | 11 LAMB1        |
| 5.91E-191 | 1.10295995  | 0.789 | 0.336 | 1.90E-186 | 11 CSGALNACT1   |
| 0         | 1.087774678 | 0.708 | 0.186 | 0         | 11 SLC25A29     |
| 3.52E-284 | 1.07996298  | 0.271 | 0.031 | 1.13E-279 | 11 ID3          |
| 2.60E-294 | 1.077997372 | 0.455 | 0.083 | 8.35E-290 | 11 HES1         |
| 4.68E-149 | 1.073781848 | 0.305 | 0.07  | 1.50E-144 | 11 NR4A2        |
| 5.09E-228 | 1.070957034 | 0.907 | 0.46  | 1.63E-223 | 11 MOB1B        |
| 0         | 1.069995728 | 0.528 | 0.11  | 0         | 11 SCCPDH       |
| 2.58E-124 | 1.065791418 | 0.813 | 0.48  | 8.30E-120 | 11 SMARCA2      |
| 4.79E-166 | 1.064419345 | 0.89  | 0.562 | 1.54E-161 | 11 NLK          |
| 1.57E-216 | 1.052226415 | 0.955 | 0.633 | 5.04E-212 | 11 FRG1HP       |
| 2.70E-43  | 1.051299057 | 0.731 | 0.513 | 8.68E-39  | 11 RANBP2       |
| 1.65E-192 | 1.043744246 | 0.973 | 0.692 | 5.30E-188 | 11 WSB1         |
| 8.21E-202 | 1.042748726 | 0.813 | 0.359 | 2.64E-197 | 11 VAV2         |
| 5.23E-147 | 1.041679648 | 0.933 | 0.663 | 1.68E-142 | 11 AAK1         |
| 1.17E-151 | 1.038290269 | 0.894 | 0.541 | 3.76E-147 | 11 STARD13      |
| 2.61E-175 | 1.038207925 | 0.738 | 0.335 | 8.40E-171 | 11 SLC44A1      |
| 3.89E-189 | 1.037639865 | 0.978 | 0.68  | 1.25E-184 | 11 AGBL4        |
| 1.07E-262 | 1.03721129  | 0.531 | 0.131 | 3.42E-258 | 11 TC2N         |
| 3.60E-251 | 1.033279469 | 0.559 | 0.146 | 1.16E-246 | 11 MCTP1        |
| 1.81E-214 | 1.03105939  | 0.741 | 0.3   | 5.82E-210 | 11 DCUN1D1      |
| 3.63E-213 | 1.029266752 | 0.992 | 0.768 | 1.17E-208 | 11 ARL15        |
| 1.53E-125 | 1.024215347 | 0.623 | 0.276 | 4.92E-121 | 11 SEMA6A       |
| 3.25E-199 | 1.023596831 | 0.925 | 0.436 | 1.04E-194 | 11 TEX41        |
| 6.16E-212 | 1.022910297 | 0.69  | 0.254 | 1.98E-207 | 11 RAPH1        |
| 3.65E-169 | 1.022631265 | 0.963 | 0.643 | 1.17E-164 | 11 RAD51B       |
| 7.20E-217 | 1.018520587 | 0.994 | 0.881 | 2.31E-212 | 11 IMMP2L       |
| 0         | 1.018012778 | 0.543 | 0.106 | 0         | 11 LYPD6B       |
| 0         | 1.017842117 | 0.586 | 0.132 | 0         | 11 SORCS2       |
| 2.71E-198 | 1.011647056 | 0.905 | 0.493 | 8.70E-194 | 11 TANC2        |
| 1.75E-198 | 1.010938977 | 0.877 | 0.421 | 5.63E-194 | 11 HSD11B2      |
| 2.03E-213 | 1.010893321 | 0.903 | 0.467 | 6.53E-209 | 11 ARHGEF35-AS1 |
| 2.97E-193 | 1.004782804 | 0.552 | 0.165 | 9.54E-189 | 11 FOS          |
| 0         | 1.003837056 | 0.732 | 0.184 | 0         | 11 APCDD1L-DT   |
| 2.74E-120 | 1.002100138 | 0.857 | 0.499 | 8.79E-116 | 11 IVNS1ABP     |
| 1.12E-166 | 0.999630869 | 0.933 | 0.624 | 3.59E-162 | 11 AL138752.2   |
| 2.11E-301 | 0.99716554  | 0.661 | 0.175 | 6.77E-297 | 11 IQUB         |
| 9.35E-173 | 0.995420575 | 0.6   | 0.214 | 3.00E-168 | 11 SOBP         |

|           |             |       |       |           |               |
|-----------|-------------|-------|-------|-----------|---------------|
| 5.14E-108 | 0.993071307 | 0.511 | 0.212 | 1.65E-103 | 11 NR4A1      |
| 1.46E-152 | 0.989601227 | 0.96  | 0.732 | 4.68E-148 | 11 NFAT5      |
| 0         | 0.986781435 | 0.584 | 0.117 | 0         | 11 SPRY4-AS1  |
| 2.93E-203 | 0.985453374 | 0.761 | 0.303 | 9.40E-199 | 11 DUSP1      |
| 1.01E-176 | 0.985440427 | 0.832 | 0.4   | 3.24E-172 | 11 TMEM51     |
| 1.23E-282 | 0.982500726 | 0.629 | 0.163 | 3.94E-278 | 11 AC005062.1 |
| 1.98E-154 | 0.979562746 | 0.68  | 0.299 | 6.36E-150 | 11 KIZ        |
| 0         | 0.979448934 | 0.551 | 0.089 | 0         | 11 AL512662.1 |
| 0         | 0.978943608 | 0.518 | 0.092 | 0         | 11 HMGCS2     |
| 9.82E-191 | 0.962973315 | 0.76  | 0.303 | 3.15E-186 | 11 FAM110B    |
| 2.63E-164 | 0.960438849 | 0.593 | 0.21  | 8.44E-160 | 11 MAN1C1     |
| 0         | 0.959558574 | 0.455 | 0.076 | 0         | 11 MIR31HG    |
| 3.77E-276 | 0.958631109 | 0.598 | 0.152 | 1.21E-271 | 11 NIPAL1     |
| 1.42E-167 | 0.957725139 | 0.449 | 0.129 | 4.56E-163 | 11 AC093865.1 |
| 5.53E-100 | 0.953678352 | 0.788 | 0.475 | 1.77E-95  | 11 ESYT2      |
| 0         | 0.951986368 | 0.522 | 0.079 | 0         | 11 LINC00609  |
| 7.00E-162 | 0.948088826 | 0.776 | 0.349 | 2.25E-157 | 11 PPARG      |
| 0         | 0.944123849 | 0.486 | 0.073 | 0         | 11 AC013470.2 |
| 3.55E-157 | 0.935679222 | 0.948 | 0.654 | 1.14E-152 | 11 PTPN13     |
| 6.28E-259 | 0.935086975 | 0.674 | 0.2   | 2.02E-254 | 11 SYK        |
| 4.67E-134 | 0.926396312 | 0.623 | 0.253 | 1.50E-129 | 11 KITLG      |
| 2.00E-63  | 0.915674633 | 0.375 | 0.161 | 6.44E-59  | 11 FAM155A    |
| 2.27E-225 | 0.915427542 | 0.749 | 0.256 | 7.30E-221 | 11 ZNF208     |
| 3.30E-195 | 0.910900175 | 0.611 | 0.209 | 1.06E-190 | 11 MAL2       |
| 1.93E-130 | 0.910085334 | 0.643 | 0.288 | 6.20E-126 | 11 FOSL2      |
| 1.23E-151 | 0.904495534 | 0.764 | 0.389 | 3.95E-147 | 11 MCCC1      |
| 8.66E-159 | 0.902211322 | 0.9   | 0.561 | 2.78E-154 | 11 SSH2       |
| 3.17E-113 | 0.901791568 | 0.761 | 0.437 | 1.02E-108 | 11 MTMR10     |
| 1.11E-141 | 0.901138029 | 0.882 | 0.509 | 3.57E-137 | 11 PTBP3      |
| 1.79E-157 | 0.897702728 | 0.798 | 0.415 | 5.74E-153 | 11 DTNB       |
| 2.29E-207 | 0.897357851 | 0.44  | 0.103 | 7.34E-203 | 11 KCNK13     |
| 0         | 0.895515133 | 0.379 | 0.03  | 0         | 11 PKIA       |
| 1.75E-140 | 0.891957336 | 0.996 | 0.818 | 5.61E-136 | 11 COBLL1     |
| 4.62E-150 | 0.891053533 | 0.848 | 0.451 | 1.49E-145 | 11 MCU        |
| 1.55E-149 | 0.890820353 | 0.961 | 0.652 | 4.97E-145 | 11 LIMCH1     |
| 1.07E-277 | 0.889755472 | 0.56  | 0.132 | 3.43E-273 | 11 FAM81A     |
| 4.14E-300 | 0.888974032 | 0.611 | 0.144 | 1.33E-295 | 11 TRERF1     |
| 5.85E-145 | 0.886336484 | 0.805 | 0.451 | 1.88E-140 | 11 MAP4K5     |
| 2.90E-109 | 0.883582734 | 0.395 | 0.135 | 9.31E-105 | 11 BRINP3     |
| 2.51E-288 | 0.883307827 | 0.524 | 0.112 | 8.07E-284 | 11 HS6ST1     |
| 4.91E-141 | 0.880774691 | 0.909 | 0.543 | 1.58E-136 | 11 STK33      |
| 4.83E-143 | 0.876941939 | 0.753 | 0.363 | 1.55E-138 | 11 CDKL1      |
| 3.73E-228 | 0.876564962 | 0.538 | 0.143 | 1.20E-223 | 11 LPCAT2     |
| 2.79E-207 | 0.874045872 | 0.657 | 0.212 | 8.97E-203 | 11 TSPAN5     |
| 3.66E-172 | 0.871933039 | 0.906 | 0.475 | 1.17E-167 | 11 HOXB3      |
| 1.87E-142 | 0.871914375 | 0.935 | 0.603 | 6.00E-138 | 11 LRRFIP1    |
| 0         | 0.871902021 | 0.487 | 0.078 | 0         | 11 RASAL1     |
| 1.82E-286 | 0.871460395 | 0.367 | 0.055 | 5.86E-282 | 11 ID1        |
| 5.02E-271 | 0.869748359 | 0.637 | 0.165 | 1.61E-266 | 11 ADAMTSL3   |
| 0         | 0.868114192 | 0.525 | 0.096 | 0         | 11 DCPS       |
| 3.13E-163 | 0.867652903 | 0.708 | 0.292 | 1.00E-158 | 11 SUSD1      |

|           |             |       |       |             |               |
|-----------|-------------|-------|-------|-------------|---------------|
| 4.30E-104 | 0.867006166 | 0.561 | 0.242 | 1.38E-99    | 11 KIF26B     |
| 0         | 0.865665103 | 0.474 | 0.07  | 0           | 11 CPAMD8     |
| 5.67E-179 | 0.864208556 | 0.8   | 0.379 | 1.82E-174   | 11 AC074386.1 |
| 1.63E-106 | 0.86262892  | 0.517 | 0.22  | 5.24E-102   | 11 LNC-LBCS   |
| 0         | 0.862473817 | 0.446 | 0.024 | 0           | 11 ELF5       |
| 1.11E-126 | 0.861692997 | 0.807 | 0.422 | 3.57E-122   | 11 KCNJ3      |
| 9.66E-146 | 0.854735145 | 0.735 | 0.336 | 3.10E-141   | 11 AC092944.1 |
| 1.30E-101 | 0.852425279 | 0.544 | 0.245 | 4.16E-97    | 11 B4GALT1    |
| 1.82E-172 | 0.850648951 | 0.838 | 0.427 | 5.83E-168   | 11 MYH10      |
| 6.55E-201 | 0.847857671 | 0.57  | 0.165 | 2.10E-196   | 11 AC011586.1 |
| 9.54E-174 | 0.846510609 | 0.701 | 0.287 | 3.06E-169   | 11 PHTF2      |
| 4.74E-141 | 0.841881446 | 0.922 | 0.613 | 1.52E-136   | 11 PPP1R9A    |
| 2.90E-45  | 0.839314328 | 0.322 | 0.161 | 9.32E-41    | 11 H3-3B      |
| 0         | 0.838448323 | 0.389 | 0.038 | 0           | 11 AC093583.1 |
| 3.83E-144 | 0.837977983 | 0.805 | 0.405 | 1.23E-139   | 11 KCNQ1      |
| 0         | 0.837976435 | 0.521 | 0.096 | 0           | 11 HELLS      |
| 2.25E-121 | 0.836832443 | 0.843 | 0.51  | 7.21E-117   | 11 RNF19A     |
| 1.89E-146 | 0.831492603 | 0.946 | 0.65  | 6.06E-142   | 11 SAMD12     |
| 2.15E-165 | 0.829249539 | 0.569 | 0.196 | 6.90E-161   | 11 MAP3K15    |
| 4.38E-146 | 0.828821725 | 0.925 | 0.577 | 1.41E-141   | 11 MIR99AHG   |
| 2.72E-196 | 0.827130369 | 0.663 | 0.229 | 8.73E-192   | 11 NPAS2      |
| 8.08E-304 | 0.816897561 | 0.457 | 0.082 | 2.59E-299   | 11 FAM20A     |
| 3.15E-223 | 0.816720218 | 0.688 | 0.226 | 1.01E-218   | 11 PIGQ       |
| 3.44E-198 | 0.813816939 | 0.42  | 0.098 | 1.10E-193   | 11 AC068051.1 |
| 1.04E-117 | 0.812251305 | 0.798 | 0.457 | 3.33E-113   | 11 GALNT11    |
| 5.84E-09  | 0.809535593 | 0.256 | 0.184 | 0.000187675 | 11 ROBO2      |
| 1.35E-95  | 0.809348121 | 0.918 | 0.656 | 4.35E-91    | 11 TRPS1      |
| 4.14E-270 | 0.808148329 | 0.502 | 0.109 | 1.33E-265   | 11 LYN        |
| 3.29E-139 | 0.806274998 | 0.815 | 0.423 | 1.06E-134   | 11 ALOX12P2   |
| 3.23E-176 | 0.806252755 | 0.457 | 0.13  | 1.04E-171   | 11 PTP4A2     |
| 5.65E-114 | 0.802406736 | 0.628 | 0.273 | 1.81E-109   | 11 MID1       |
| 7.31E-111 | 0.801021361 | 0.709 | 0.37  | 2.35E-106   | 11 AC004160.1 |
| 2.82E-140 | 0.798090935 | 0.685 | 0.291 | 9.04E-136   | 11 ABCB1      |
| 0         | 0.797696624 | 0.412 | 0.06  | 0           | 11 LINC02649  |
| 0         | 0.791306767 | 0.492 | 0.082 | 0           | 11 FGD3       |
| 3.81E-109 | 0.791141159 | 0.658 | 0.327 | 1.22E-104   | 11 CREM       |
| 3.61E-133 | 0.790235742 | 0.837 | 0.483 | 1.16E-128   | 11 DOCK7      |
| 9.78E-129 | 0.78746218  | 0.827 | 0.478 | 3.14E-124   | 11 ZFH3       |
| 7.61E-122 | 0.785037301 | 0.863 | 0.527 | 2.45E-117   | 11 CYRIB      |
| 9.36E-83  | 0.782042203 | 0.3   | 0.101 | 3.01E-78    | 11 ID2        |
| 1.58E-175 | 0.781648434 | 0.701 | 0.27  | 5.08E-171   | 11 RALBP1     |
| 3.48E-132 | 0.778017809 | 0.96  | 0.654 | 1.12E-127   | 11 PAX8-AS1   |
| 9.64E-185 | 0.774555813 | 0.613 | 0.207 | 3.10E-180   | 11 SPAG17     |
| 3.31E-148 | 0.774053456 | 0.824 | 0.409 | 1.06E-143   | 11 BICD1      |
| 1.20E-161 | 0.771334512 | 0.807 | 0.353 | 3.87E-157   | 11 MYO1B      |
| 1.88E-157 | 0.770307092 | 0.337 | 0.079 | 6.04E-153   | 11 PRPS2      |
| 1.14E-143 | 0.769641093 | 0.981 | 0.796 | 3.66E-139   | 11 MED13L     |
| 4.86E-117 | 0.763204766 | 0.891 | 0.539 | 1.56E-112   | 11 CYFIP2     |
| 5.90E-102 | 0.759877993 | 0.929 | 0.64  | 1.89E-97    | 11 NFIB       |
| 1.95E-120 | 0.759342764 | 0.64  | 0.283 | 6.25E-116   | 11 SLC9C1     |
| 2.99E-128 | 0.757771294 | 0.909 | 0.567 | 9.60E-124   | 11 ASAP2      |

|           |             |       |       |           |               |
|-----------|-------------|-------|-------|-----------|---------------|
| 1.28E-253 | 0.755658513 | 0.36  | 0.06  | 4.12E-249 | 11 GATA2      |
| 3.44E-208 | 0.755632656 | 0.551 | 0.153 | 1.11E-203 | 11 TPM4       |
| 6.65E-107 | 0.750818666 | 0.302 | 0.086 | 2.14E-102 | 11 AC018742.1 |
| 2.58E-151 | 0.749695603 | 0.579 | 0.216 | 8.30E-147 | 11 SLC23A2    |
| 9.88E-110 | 0.744559226 | 0.735 | 0.399 | 3.17E-105 | 11 GPCPD1     |
| 2.39E-274 | 0.740482434 | 0.446 | 0.082 | 7.69E-270 | 11 XYLT1      |
| 5.27E-128 | 0.738621006 | 0.983 | 0.808 | 1.69E-123 | 11 MAPK10     |
| 1.69E-145 | 0.735305163 | 0.68  | 0.278 | 5.41E-141 | 11 CDH1       |
| 1.51E-123 | 0.734454382 | 0.331 | 0.088 | 4.85E-119 | 11 KRT19      |
| 2.49E-93  | 0.733263937 | 0.37  | 0.13  | 7.98E-89  | 11 ATF3       |
| 6.55E-149 | 0.730632864 | 0.605 | 0.235 | 2.10E-144 | 11 AIF1L      |
| 1.07E-189 | 0.728446898 | 0.531 | 0.151 | 3.42E-185 | 11 AC011586.2 |
| 6.07E-232 | 0.721616029 | 0.48  | 0.11  | 1.95E-227 | 11 AFAP1L2    |
| 1.09E-127 | 0.718598524 | 0.341 | 0.093 | 3.48E-123 | 11 PAG1       |
| 1.30E-137 | 0.718408997 | 0.68  | 0.304 | 4.16E-133 | 11 IQCK       |
| 9.02E-157 | 0.717519728 | 0.408 | 0.111 | 2.90E-152 | 11 SLC9A2     |
| 5.09E-297 | 0.708510019 | 0.456 | 0.082 | 1.64E-292 | 11 UGT3A1     |
| 4.73E-59  | 0.708379661 | 0.473 | 0.237 | 1.52E-54  | 11 BHLHE40    |
| 1.11E-105 | 0.708337306 | 0.767 | 0.428 | 3.57E-101 | 11 SEPTIN11   |
| 2.50E-48  | 0.707625239 | 0.421 | 0.221 | 8.01E-44  | 11 BANP       |
| 2.15E-97  | 0.707026826 | 0.892 | 0.609 | 6.92E-93  | 11 AHI1       |
| 9.01E-145 | 0.706916791 | 0.635 | 0.247 | 2.89E-140 | 11 AC022414.1 |
| 0         | 0.706852089 | 0.309 | 0.023 | 0         | 11 ADAM23     |
| 3.04E-143 | 0.706129635 | 0.741 | 0.326 | 9.75E-139 | 11 BLNK       |
| 3.00E-68  | 0.704646461 | 0.673 | 0.397 | 9.62E-64  | 11 DPH6-DT    |
| 2.06E-156 | 0.70242069  | 0.623 | 0.24  | 6.60E-152 | 11 PGM5       |
| 1.78E-89  | 0.701842818 | 0.602 | 0.306 | 5.72E-85  | 11 ZFP36L1    |
| 1.83E-169 | 0.700822124 | 0.375 | 0.092 | 5.87E-165 | 11 GPM6B      |
| 4.99E-128 | 0.69881201  | 0.848 | 0.46  | 1.60E-123 | 11 HOXD3      |
| 1.27E-95  | 0.696764838 | 0.872 | 0.559 | 4.09E-91  | 11 ZNF704     |
| 7.11E-115 | 0.696591466 | 0.883 | 0.543 | 2.28E-110 | 11 TPST1      |
| 7.10E-134 | 0.696554563 | 0.757 | 0.35  | 2.28E-129 | 11 GRHL2      |
| 0         | 0.692076432 | 0.388 | 0.041 | 0         | 11 SHCBP1     |
| 4.81E-112 | 0.690778136 | 0.596 | 0.266 | 1.55E-107 | 11 CD24       |
| 1.86E-71  | 0.68685984  | 0.513 | 0.252 | 5.99E-67  | 11 CHSY1      |
| 3.38E-63  | 0.682823318 | 0.346 | 0.143 | 1.09E-58  | 11 LINC01876  |
| 2.62E-81  | 0.680610019 | 0.766 | 0.467 | 8.40E-77  | 11 RAP1B      |
| 2.80E-95  | 0.679821851 | 0.707 | 0.374 | 8.98E-91  | 11 CARMIL1    |
| 2.60E-72  | 0.676541547 | 0.977 | 0.757 | 8.36E-68  | 11 AC019197.1 |
| 7.65E-113 | 0.67639781  | 0.385 | 0.123 | 2.46E-108 | 11 RASD1      |
| 6.64E-70  | 0.672817499 | 0.484 | 0.237 | 2.13E-65  | 11 TGFBR1     |
| 7.46E-112 | 0.670886108 | 0.779 | 0.415 | 2.39E-107 | 11 MGMT       |
| 1.13E-235 | 0.670836533 | 0.29  | 0.043 | 3.64E-231 | 11 ARL4D      |
| 1.17E-94  | 0.667334838 | 0.858 | 0.537 | 3.75E-90  | 11 DAPK1      |
| 4.09E-113 | 0.666864002 | 0.998 | 0.784 | 1.31E-108 | 11 CCSER1     |
| 0         | 0.664934579 | 0.328 | 0.039 | 0         | 11 LY75-CD302 |
| 0         | 0.664710677 | 0.33  | 0.035 | 0         | 11 DOC2B      |
| 4.05E-168 | 0.663749184 | 0.313 | 0.065 | 1.30E-163 | 11 LINC01503  |
| 2.31E-165 | 0.661918092 | 0.486 | 0.144 | 7.41E-161 | 11 AC004540.1 |
| 4.99E-87  | 0.65911466  | 0.744 | 0.432 | 1.60E-82  | 11 SEPTIN9    |
| 3.41E-91  | 0.65819113  | 0.885 | 0.575 | 1.10E-86  | 11 WWC1       |



|           |             |       |       |           |               |
|-----------|-------------|-------|-------|-----------|---------------|
| 1.06E-105 | 0.656377574 | 0.792 | 0.456 | 3.42E-101 | 11 CDC42BPB   |
| 1.15E-108 | 0.654964456 | 0.62  | 0.277 | 3.69E-104 | 11 ADAM22     |
| 0         | 0.654373086 | 0.271 | 0.026 | 0         | 11 AC073172.1 |
| 5.90E-91  | 0.653758992 | 0.829 | 0.506 | 1.89E-86  | 11 C4orf19    |
| 7.77E-120 | 0.653053115 | 0.806 | 0.4   | 2.50E-115 | 11 FAM171A1   |
| 1.30E-78  | 0.650461435 | 0.865 | 0.605 | 4.16E-74  | 11 FER        |
| 3.83E-147 | 0.649656109 | 0.56  | 0.191 | 1.23E-142 | 11 RERGL      |
| 2.76E-94  | 0.649344601 | 0.981 | 0.785 | 8.87E-90  | 11 NR3C2      |
| 1.18E-114 | 0.647841308 | 0.954 | 0.736 | 3.79E-110 | 11 WDFY3      |
| 7.88E-120 | 0.647788633 | 0.883 | 0.511 | 2.53E-115 | 11 PAX8       |
| 3.14E-155 | 0.645598245 | 0.531 | 0.179 | 1.01E-150 | 11 TGS1       |
| 2.60E-112 | 0.64225953  | 0.379 | 0.119 | 8.35E-108 | 11 LINC01508  |
| 1.15E-123 | 0.638127066 | 0.463 | 0.162 | 3.69E-119 | 11 AL136115.2 |
| 1.19E-98  | 0.633774272 | 0.644 | 0.301 | 3.83E-94  | 11 GPRIN3     |
| 7.73E-90  | 0.633748557 | 0.788 | 0.491 | 2.48E-85  | 11 NUP214     |
| 1.33E-95  | 0.632655073 | 0.854 | 0.544 | 4.29E-91  | 11 TRAK1      |
| 4.59E-232 | 0.630783152 | 0.487 | 0.114 | 1.47E-227 | 11 CDK18      |
| 1.66E-80  | 0.62934752  | 0.775 | 0.48  | 5.35E-76  | 11 MTUS1      |
| 1.09E-143 | 0.628091567 | 0.758 | 0.347 | 3.49E-139 | 11 HIP1R      |
| 2.56E-141 | 0.627916752 | 0.577 | 0.207 | 8.23E-137 | 11 RIMBP2     |
| 0         | 0.626541958 | 0.324 | 0.022 | 0         | 11 NPAP1      |
| 2.14E-135 | 0.626277082 | 0.645 | 0.275 | 6.89E-131 | 11 AC139769.1 |
| 8.00E-156 | 0.62571606  | 0.498 | 0.157 | 2.57E-151 | 11 ARHGAP44   |
| 4.20E-273 | 0.623320766 | 0.355 | 0.055 | 1.35E-268 | 11 HACD1      |
| 5.11E-307 | 0.622635606 | 0.262 | 0.026 | 1.64E-302 | 11 AC064875.1 |
| 2.20E-104 | 0.618266976 | 0.565 | 0.243 | 7.06E-100 | 11 DCDC1      |
| 2.07E-141 | 0.616719267 | 0.577 | 0.22  | 6.66E-137 | 11 NASP       |
| 1.85E-123 | 0.615457234 | 0.899 | 0.498 | 5.94E-119 | 11 SDK1       |
| 1.80E-76  | 0.614150633 | 0.906 | 0.646 | 5.77E-72  | 11 SH3RF1     |
| 8.76E-94  | 0.614102629 | 0.814 | 0.458 | 2.81E-89  | 11 SSBP2      |
| 8.96E-89  | 0.613278271 | 0.832 | 0.483 | 2.88E-84  | 11 NOS1AP     |
| 5.50E-105 | 0.613188733 | 0.794 | 0.434 | 1.77E-100 | 11 STXBP5     |
| 4.45E-102 | 0.613141434 | 0.592 | 0.27  | 1.43E-97  | 11 PLSCR1     |
| 4.29E-102 | 0.609819507 | 0.705 | 0.351 | 1.38E-97  | 11 SPATS2     |
| 8.90E-73  | 0.60744086  | 0.977 | 0.806 | 2.86E-68  | 11 PRKN       |
| 1.31E-122 | 0.606770071 | 0.362 | 0.105 | 4.19E-118 | 11 AFAP1      |
| 1.63E-81  | 0.604425897 | 0.744 | 0.453 | 5.24E-77  | 11 EFR3A      |
| 2.61E-125 | 0.601825112 | 0.794 | 0.378 | 8.37E-121 | 11 MYO3B      |
| 1.22E-90  | 0.599225414 | 0.979 | 0.779 | 3.90E-86  | 11 NAALADL2   |
| 3.81E-134 | 0.597225793 | 0.448 | 0.146 | 1.22E-129 | 11 NR2F2      |
| 8.57E-84  | 0.595210807 | 0.469 | 0.197 | 2.75E-79  | 11 MAPK4      |
| 5.98E-99  | 0.594858812 | 0.518 | 0.219 | 1.92E-94  | 11 RNF24      |
| 8.58E-113 | 0.59466343  | 0.837 | 0.427 | 2.76E-108 | 11 PRDM16     |
| 2.74E-117 | 0.592242456 | 0.453 | 0.158 | 8.81E-113 | 11 C3orf52    |
| 2.41E-92  | 0.592118364 | 0.744 | 0.425 | 7.74E-88  | 11 RAB6A      |
| 4.57E-88  | 0.591593177 | 0.535 | 0.245 | 1.47E-83  | 11 YWHAEP7    |
| 5.02E-133 | 0.590392025 | 0.315 | 0.078 | 1.61E-128 | 11 STXBP6     |
| 3.14E-60  | 0.589722781 | 0.321 | 0.127 | 1.01E-55  | 11 ELF3       |
| 4.86E-82  | 0.589413964 | 0.788 | 0.484 | 1.56E-77  | 11 ATF6       |
| 1.03E-95  | 0.588704045 | 0.901 | 0.507 | 3.31E-91  | 11 FREM1      |
| 1.62E-90  | 0.588107288 | 0.784 | 0.476 | 5.22E-86  | 11 AL591684.2 |

|           |             |       |       |           |               |
|-----------|-------------|-------|-------|-----------|---------------|
| 2.01E-79  | 0.58726541  | 0.911 | 0.623 | 6.45E-75  | 11 THRB       |
| 3.44E-96  | 0.586323631 | 0.969 | 0.784 | 1.11E-91  | 11 PTK2       |
| 1.76E-38  | 0.585454706 | 0.62  | 0.399 | 5.66E-34  | 11 VPS37B     |
| 1.27E-94  | 0.58442256  | 0.816 | 0.462 | 4.08E-90  | 11 SPIRE1     |
| 2.47E-156 | 0.582500693 | 0.435 | 0.122 | 7.92E-152 | 11 JUNB       |
| 3.92E-90  | 0.581366934 | 0.478 | 0.203 | 1.26E-85  | 11 SLC38A11   |
| 6.70E-187 | 0.579482278 | 0.379 | 0.085 | 2.15E-182 | 11 SMIM5      |
| 6.60E-158 | 0.577946658 | 0.494 | 0.153 | 2.12E-153 | 11 RASGRP1    |
| 3.51E-135 | 0.576317271 | 0.527 | 0.186 | 1.13E-130 | 11 GPR160     |
| 5.74E-100 | 0.572992356 | 0.797 | 0.442 | 1.84E-95  | 11 ARHGEF10L  |
| 5.66E-89  | 0.572963665 | 0.501 | 0.211 | 1.82E-84  | 11 GNAI1      |
| 1.69E-75  | 0.572411695 | 0.915 | 0.682 | 5.44E-71  | 11 MTR        |
| 8.85E-102 | 0.570900798 | 0.358 | 0.115 | 2.84E-97  | 11 AC044810.3 |
| 3.03E-90  | 0.570688799 | 0.652 | 0.337 | 9.74E-86  | 11 CRTC3      |
| 1.57E-65  | 0.570621401 | 0.757 | 0.481 | 5.03E-61  | 11 SLC20A2    |
| 8.05E-113 | 0.566148595 | 0.999 | 0.873 | 2.59E-108 | 11 PKHD1      |
| 2.81E-85  | 0.565026562 | 0.953 | 0.757 | 9.03E-81  | 11 BAZ2B      |
| 9.33E-164 | 0.564532991 | 0.53  | 0.165 | 3.00E-159 | 11 KCNC3      |
| 1.58E-102 | 0.56414781  | 0.338 | 0.104 | 5.07E-98  | 11 ADAMTS3    |
| 2.48E-64  | 0.561064641 | 0.635 | 0.369 | 7.95E-60  | 11 CLCN3      |
| 2.86E-74  | 0.559298035 | 0.589 | 0.318 | 9.18E-70  | 11 SNX2       |
| 0         | 0.558560044 | 0.292 | 0.017 | 0         | 11 PTCSC3     |
| 1.90E-76  | 0.55461053  | 0.943 | 0.707 | 6.11E-72  | 11 ADK        |
| 1.64E-79  | 0.554436048 | 0.8   | 0.502 | 5.27E-75  | 11 TMEM245    |
| 7.69E-99  | 0.554375708 | 0.596 | 0.277 | 2.47E-94  | 11 KLHL2      |
| 3.20E-123 | 0.554198978 | 0.438 | 0.142 | 1.03E-118 | 11 PLCZ1      |
| 7.14E-113 | 0.553702168 | 0.504 | 0.192 | 2.29E-108 | 11 AC139795.1 |
| 4.61E-66  | 0.553347959 | 0.719 | 0.437 | 1.48E-61  | 11 ATG10      |
| 6.04E-57  | 0.553319737 | 0.559 | 0.313 | 1.94E-52  | 11 FGFR2      |
| 1.01E-77  | 0.552132415 | 0.474 | 0.215 | 3.25E-73  | 11 LRRC1      |
| 1.63E-81  | 0.55170869  | 0.567 | 0.267 | 5.25E-77  | 11 GPR39      |
| 1.06E-58  | 0.550980363 | 0.501 | 0.256 | 3.40E-54  | 11 LINC01266  |
| 1.26E-111 | 0.547105906 | 0.496 | 0.187 | 4.05E-107 | 11 ICA1L      |
| 8.57E-44  | 0.545395061 | 0.633 | 0.405 | 2.75E-39  | 11 AL355499.2 |
| 1.30E-107 | 0.545005853 | 0.419 | 0.147 | 4.17E-103 | 11 IKZF2      |
| 5.19E-80  | 0.543529098 | 0.783 | 0.492 | 1.67E-75  | 11 ZDHHC21    |
| 5.43E-178 | 0.543297112 | 0.485 | 0.13  | 1.74E-173 | 11 PROM1      |
| 4.83E-85  | 0.543269048 | 0.427 | 0.173 | 1.55E-80  | 11 KLHL8      |
| 4.65E-71  | 0.542484776 | 0.518 | 0.259 | 1.49E-66  | 11 ADAM9      |
| 1.68E-58  | 0.5421267   | 0.67  | 0.385 | 5.38E-54  | 11 ADAMTS16   |
| 2.85E-85  | 0.541194716 | 0.551 | 0.258 | 9.15E-81  | 11 TBC1D12    |
| 5.68E-85  | 0.540222711 | 0.861 | 0.549 | 1.82E-80  | 11 ADGRL2     |
| 2.06E-90  | 0.539676073 | 0.977 | 0.815 | 6.63E-86  | 11 ARID1B     |
| 1.70E-302 | 0.534435442 | 0.329 | 0.042 | 5.46E-298 | 11 GATA3-AS1  |
| 2.53E-70  | 0.532661766 | 0.864 | 0.588 | 8.11E-66  | 11 TCF7L2     |
| 3.15E-111 | 0.53171476  | 0.426 | 0.146 | 1.01E-106 | 11 FAM149A    |
| 5.33E-136 | 0.531312253 | 0.427 | 0.131 | 1.71E-131 | 11 SPTBN2     |
| 5.75E-05  | 0.531026342 | 0.279 | 0.228 | 1         | 11 SQSTM1     |
| 2.04E-85  | 0.530219288 | 0.719 | 0.367 | 6.55E-81  | 11 CACNA2D1   |
| 7.86E-94  | 0.528919515 | 0.823 | 0.494 | 2.53E-89  | 11 MIR3936HG  |
| 4.48E-97  | 0.528652042 | 0.594 | 0.268 | 1.44E-92  | 11 SORL1      |

|           |             |       |       |           |               |
|-----------|-------------|-------|-------|-----------|---------------|
| 2.17E-200 | 0.527540903 | 0.394 | 0.086 | 6.98E-196 | 11 AC139769.2 |
| 1.20E-138 | 0.5269818   | 0.392 | 0.11  | 3.86E-134 | 11 NEK10      |
| 4.01E-76  | 0.526571192 | 0.972 | 0.756 | 1.29E-71  | 11 KIAA1217   |
| 1.48E-85  | 0.526557022 | 0.569 | 0.272 | 4.76E-81  | 11 ANKRD13A   |
| 2.70E-36  | 0.525894853 | 0.478 | 0.289 | 8.68E-32  | 11 SLC19A2    |
| 4.85E-107 | 0.525848661 | 0.449 | 0.161 | 1.56E-102 | 11 LRR1Q1     |
| 3.26E-53  | 0.524737232 | 0.775 | 0.519 | 1.05E-48  | 11 JARID2     |
| 5.05E-67  | 0.521773101 | 0.749 | 0.451 | 1.62E-62  | 11 FAM107B    |
| 1.08E-73  | 0.518609574 | 0.764 | 0.481 | 3.48E-69  | 11 SNRPN      |
| 4.81E-59  | 0.518270998 | 0.829 | 0.562 | 1.54E-54  | 11 SGMS1      |
| 5.30E-61  | 0.515298098 | 0.62  | 0.362 | 1.70E-56  | 11 MBP        |
| 4.70E-112 | 0.515223801 | 0.599 | 0.252 | 1.51E-107 | 11 HYDIN      |
| 1.61E-80  | 0.514702473 | 0.754 | 0.373 | 5.16E-76  | 11 KCNJ15     |
| 1.54E-68  | 0.51226923  | 0.771 | 0.475 | 4.93E-64  | 11 RAI14      |
| 9.03E-81  | 0.511138482 | 0.654 | 0.343 | 2.90E-76  | 11 PDE9A      |
| 4.69E-57  | 0.510279399 | 0.701 | 0.436 | 1.51E-52  | 11 LCORL      |
| 2.59E-83  | 0.510168042 | 0.66  | 0.347 | 8.32E-79  | 11 ZNF10      |
| 5.80E-76  | 0.509470124 | 0.311 | 0.11  | 1.86E-71  | 11 AL355499.1 |
| 4.42E-104 | 0.509010585 | 0.58  | 0.245 | 1.42E-99  | 11 MTHFD1L    |
| 1.60E-68  | 0.507614519 | 0.803 | 0.526 | 5.15E-64  | 11 C11orf49   |
| 1.21E-65  | 0.506344362 | 0.469 | 0.224 | 3.90E-61  | 11 ATP8B1     |
| 4.78E-123 | 0.506109682 | 0.31  | 0.081 | 1.54E-118 | 11 RBKS       |
| 3.66E-22  | 0.506098762 | 0.363 | 0.223 | 1.17E-17  | 11 SNTG1      |
| 2.46E-15  | 0.504958106 | 0.367 | 0.26  | 7.91E-11  | 11 GNA13      |
| 8.72E-71  | 0.50474301  | 0.703 | 0.375 | 2.80E-66  | 11 SIM1       |
| 2.10E-53  | 0.504425373 | 0.946 | 0.669 | 6.73E-49  | 11 AC005208.1 |
| 1.26E-103 | 0.503816047 | 0.388 | 0.129 | 4.04E-99  | 11 AL512506.3 |
| 4.08E-81  | 0.502043073 | 0.613 | 0.307 | 1.31E-76  | 11 DZIP3      |
| 1.41E-84  | 0.501862011 | 0.835 | 0.474 | 4.52E-80  | 11 TOX3       |
| 4.95E-68  | 0.501258402 | 0.585 | 0.325 | 1.59E-63  | 11 DNAJB6     |
| 7.23E-69  | 0.501124241 | 0.648 | 0.356 | 2.32E-64  | 11 HGSNAT     |
| 1.03E-66  | 0.501119486 | 0.376 | 0.155 | 3.31E-62  | 11 UNC13C     |
| 4.64E-20  | 0.499793853 | 0.372 | 0.247 | 1.49E-15  | 11 ACTG1      |
| 5.34E-93  | 0.498724614 | 0.416 | 0.158 | 1.71E-88  | 11 PIM3       |
| 1.32E-70  | 0.497590294 | 0.794 | 0.492 | 4.26E-66  | 11 PTPN3      |
| 1.52E-83  | 0.496753043 | 0.668 | 0.344 | 4.89E-79  | 11 SCML1      |
| 7.33E-83  | 0.49540957  | 0.854 | 0.531 | 2.35E-78  | 11 PAX2       |
| 2.91E-86  | 0.495030529 | 0.666 | 0.346 | 9.36E-82  | 11 AC079594.1 |
| 7.02E-120 | 0.493339434 | 0.604 | 0.24  | 2.26E-115 | 11 TRPV4      |
| 9.70E-164 | 0.492687248 | 0.585 | 0.185 | 3.11E-159 | 11 ADGRF1     |
| 3.43E-82  | 0.492428971 | 0.638 | 0.324 | 1.10E-77  | 11 FLG-AS1    |
| 2.64E-86  | 0.492135473 | 0.36  | 0.131 | 8.47E-82  | 11 TFDPI      |
| 3.04E-55  | 0.492009163 | 0.46  | 0.235 | 9.76E-51  | 11 USP36      |
| 3.10E-65  | 0.491361231 | 0.65  | 0.349 | 9.96E-61  | 11 SGPP2      |
| 7.49E-140 | 0.491125322 | 0.516 | 0.169 | 2.40E-135 | 11 IQCA1      |
| 3.19E-63  | 0.491039478 | 0.725 | 0.46  | 1.03E-58  | 11 AC022826.2 |
| 1.73E-38  | 0.488358875 | 0.324 | 0.164 | 5.57E-34  | 11 PTMA       |
| 9.05E-70  | 0.487665255 | 0.67  | 0.384 | 2.91E-65  | 11 GRAMD1C    |
| 2.70E-189 | 0.486953574 | 0.348 | 0.07  | 8.67E-185 | 11 MOCOS      |
| 1.57E-77  | 0.485862275 | 0.446 | 0.189 | 5.05E-73  | 11 LINC00882  |
| 2.06E-115 | 0.485515587 | 0.657 | 0.3   | 6.60E-111 | 11 COPG2      |

|           |             |       |       |           |               |
|-----------|-------------|-------|-------|-----------|---------------|
| 8.74E-64  | 0.484117023 | 0.88  | 0.622 | 2.81E-59  | 11 AC027644.4 |
| 1.55E-93  | 0.48337943  | 0.509 | 0.212 | 4.98E-89  | 11 AL390879.1 |
| 5.54E-55  | 0.483180282 | 0.745 | 0.46  | 1.78E-50  | 11 LINC01725  |
| 1.59E-64  | 0.482658123 | 0.734 | 0.449 | 5.12E-60  | 11 PCGF5      |
| 1.51E-79  | 0.48222419  | 0.669 | 0.353 | 4.85E-75  | 11 SYTL2      |
| 4.40E-107 | 0.480617423 | 0.317 | 0.09  | 1.41E-102 | 11 AC025887.2 |
| 8.87E-82  | 0.480386343 | 0.737 | 0.387 | 2.85E-77  | 11 STOX2      |
| 1.32E-61  | 0.477114414 | 0.781 | 0.51  | 4.23E-57  | 11 ADAM10     |
| 6.25E-78  | 0.477112517 | 0.567 | 0.272 | 2.01E-73  | 11 CSRNP3     |
| 1.78E-86  | 0.476690325 | 0.488 | 0.211 | 5.72E-82  | 11 PAPSS1     |
| 6.84E-73  | 0.476420009 | 0.666 | 0.382 | 2.20E-68  | 11 BMS1P1     |
| 3.47E-64  | 0.475968445 | 0.57  | 0.3   | 1.11E-59  | 11 GALNT7     |
| 1.19E-82  | 0.473901114 | 0.65  | 0.331 | 3.83E-78  | 11 CASZ1      |
| 1.08E-77  | 0.473640733 | 0.899 | 0.596 | 3.48E-73  | 11 CCDC198    |
| 3.14E-79  | 0.473465518 | 0.661 | 0.35  | 1.01E-74  | 11 LINC01145  |
| 1.28E-226 | 0.472982996 | 0.252 | 0.032 | 4.12E-222 | 11 COL22A1    |
| 6.84E-57  | 0.472229708 | 0.623 | 0.366 | 2.20E-52  | 11 BCAR3      |
| 1.55E-68  | 0.471996116 | 0.291 | 0.103 | 4.96E-64  | 11 GRIK2      |
| 5.18E-102 | 0.47175983  | 0.515 | 0.201 | 1.66E-97  | 11 REPS2      |
| 6.38E-76  | 0.471472358 | 0.708 | 0.382 | 2.05E-71  | 11 DIAPH2     |
| 2.19E-86  | 0.470889241 | 0.611 | 0.287 | 7.02E-82  | 11 CEMIP2     |
| 2.19E-161 | 0.47079221  | 0.35  | 0.082 | 7.05E-157 | 11 AC004594.1 |
| 1.72E-92  | 0.470469357 | 0.378 | 0.134 | 5.53E-88  | 11 ZNF350-AS1 |
| 2.67E-57  | 0.469086756 | 0.813 | 0.545 | 8.58E-53  | 11 ARHGAP29   |
| 9.34E-108 | 0.465504142 | 0.341 | 0.103 | 3.00E-103 | 11 CATSPERB   |
| 1.03E-111 | 0.465170604 | 0.347 | 0.105 | 3.31E-107 | 11 HOXB7      |
| 6.04E-58  | 0.464032197 | 0.819 | 0.523 | 1.94E-53  | 11 TLN2       |
| 1.09E-61  | 0.462945649 | 0.834 | 0.557 | 3.50E-57  | 11 YAPI       |
| 2.41E-76  | 0.460531223 | 0.533 | 0.262 | 7.75E-72  | 11 MICOS10    |
| 1.62E-150 | 0.457982951 | 0.42  | 0.116 | 5.20E-146 | 11 KCP        |
| 4.79E-93  | 0.456790295 | 0.679 | 0.316 | 1.54E-88  | 11 ZNF98      |
| 3.55E-82  | 0.455437077 | 0.423 | 0.168 | 1.14E-77  | 11 PRTG       |
| 5.90E-26  | 0.455151845 | 0.407 | 0.252 | 1.89E-21  | 11 XIST       |
| 9.66E-97  | 0.45440787  | 0.594 | 0.262 | 3.10E-92  | 11 NHSL1      |
| 6.47E-34  | 0.453335198 | 0.628 | 0.412 | 2.08E-29  | 11 BACH2      |
| 1.55E-114 | 0.453320724 | 0.307 | 0.081 | 4.97E-110 | 11 PVT1       |
| 3.03E-152 | 0.452144979 | 0.332 | 0.076 | 9.74E-148 | 11 PRR5L      |
| 1.23E-51  | 0.451225591 | 0.755 | 0.489 | 3.95E-47  | 11 UMAD1      |
| 8.35E-143 | 0.450325444 | 0.285 | 0.062 | 2.68E-138 | 11 SIK1       |
| 5.90E-75  | 0.449385093 | 0.291 | 0.097 | 1.89E-70  | 11 EHF        |
| 1.27E-93  | 0.449305425 | 0.523 | 0.216 | 4.06E-89  | 11 PRDM16-DT  |
| 3.14E-57  | 0.448427935 | 0.819 | 0.56  | 1.01E-52  | 11 SDCCAG8    |
| 9.99E-103 | 0.448225114 | 0.399 | 0.135 | 3.21E-98  | 11 LIPH       |
| 1.19E-73  | 0.447868795 | 0.69  | 0.371 | 3.83E-69  | 11 IPCEF1     |
| 2.38E-17  | 0.447430532 | 0.302 | 0.192 | 7.65E-13  | 11 ZFP36      |
| 8.81E-60  | 0.447279521 | 0.65  | 0.383 | 2.83E-55  | 11 RLF        |
| 5.80E-53  | 0.446875177 | 0.765 | 0.488 | 1.86E-48  | 11 MLLT3      |
| 1.46E-83  | 0.446351928 | 0.775 | 0.44  | 4.70E-79  | 11 PALLD      |
| 4.05E-58  | 0.443606216 | 0.785 | 0.5   | 1.30E-53  | 11 GAB1       |
| 3.28E-75  | 0.442005353 | 0.948 | 0.72  | 1.05E-70  | 11 GLS        |
| 1.07E-72  | 0.440005635 | 0.502 | 0.228 | 3.44E-68  | 11 COL28A1    |

|           |             |       |       |           |                  |
|-----------|-------------|-------|-------|-----------|------------------|
| 1.61E-45  | 0.439377237 | 0.921 | 0.702 | 5.17E-41  | 11 DLG2          |
| 3.18E-131 | 0.438081821 | 0.32  | 0.081 | 1.02E-126 | 11 GMNN          |
| 5.17E-127 | 0.436507853 | 0.324 | 0.084 | 1.66E-122 | 11 SMIM41        |
| 3.58E-79  | 0.434554434 | 0.47  | 0.205 | 1.15E-74  | 11 RAB40C        |
| 4.71E-55  | 0.434417641 | 0.488 | 0.253 | 1.51E-50  | 11 GPD2          |
| 1.68E-54  | 0.433144181 | 0.838 | 0.587 | 5.39E-50  | 11 NBEA          |
| 3.92E-60  | 0.431851103 | 0.679 | 0.397 | 1.26E-55  | 11 UBL3          |
| 8.27E-108 | 0.429672383 | 0.37  | 0.117 | 2.66E-103 | 11 NEK5          |
| 2.65E-93  | 0.429144509 | 0.398 | 0.146 | 8.50E-89  | 11 GLUD1P2       |
| 8.16E-80  | 0.429019573 | 0.895 | 0.56  | 2.62E-75  | 11 NEBL          |
| 4.70E-78  | 0.427946925 | 0.435 | 0.177 | 1.51E-73  | 11 KCNS3         |
| 3.39E-65  | 0.42792867  | 0.712 | 0.406 | 1.09E-60  | 11 DNAH7         |
| 6.14E-57  | 0.427311353 | 0.602 | 0.346 | 1.97E-52  | 11 SYNJ2BP-COX10 |
| 1.42E-64  | 0.427041476 | 0.572 | 0.31  | 4.55E-60  | 11 MFN1          |
| 1.40E-136 | 0.424690286 | 0.379 | 0.103 | 4.50E-132 | 11 TLE2          |
| 8.67E-85  | 0.423694703 | 0.377 | 0.139 | 2.79E-80  | 11 CROT          |
| 2.50E-59  | 0.423249509 | 0.645 | 0.369 | 8.04E-55  | 11 IQCH          |
| 6.87E-59  | 0.422310773 | 0.919 | 0.686 | 2.21E-54  | 11 KIAA1109      |
| 1.57E-56  | 0.422260856 | 0.893 | 0.669 | 5.05E-52  | 11 PCM1          |
| 2.23E-28  | 0.422143511 | 0.494 | 0.321 | 7.16E-24  | 11 COL4A1        |
| 6.48E-49  | 0.420818388 | 0.404 | 0.198 | 2.08E-44  | 11 RNF144B       |
| 1.46E-72  | 0.420449363 | 0.514 | 0.236 | 4.69E-68  | 11 CPVL          |
| 2.09E-52  | 0.420256423 | 0.856 | 0.626 | 6.72E-48  | 11 MARK3         |
| 1.45E-162 | 0.419412508 | 0.323 | 0.068 | 4.66E-158 | 11 CORO2B        |
| 4.83E-43  | 0.418979457 | 0.29  | 0.133 | 1.55E-38  | 11 TOB1          |
| 4.61E-64  | 0.4182037   | 0.697 | 0.404 | 1.48E-59  | 11 NEK11         |
| 6.83E-60  | 0.417030157 | 0.637 | 0.366 | 2.19E-55  | 11 CU633904.1    |
| 1.09E-65  | 0.415134487 | 0.488 | 0.237 | 3.50E-61  | 11 CEP170        |
| 1.74E-58  | 0.414681179 | 0.511 | 0.267 | 5.59E-54  | 11 ZNF236        |
| 9.42E-52  | 0.413933895 | 0.807 | 0.563 | 3.03E-47  | 11 TLK1          |
| 2.48E-85  | 0.410696864 | 0.339 | 0.117 | 7.95E-81  | 11 TLCD4         |
| 1.15E-35  | 0.410563815 | 0.802 | 0.58  | 3.70E-31  | 11 TRHDE         |
| 3.67E-56  | 0.410362223 | 0.423 | 0.201 | 1.18E-51  | 11 PTP4A1        |
| 2.59E-96  | 0.410181834 | 0.339 | 0.108 | 8.32E-92  | 11 CFAP47        |
| 3.72E-80  | 0.409706972 | 0.448 | 0.19  | 1.19E-75  | 11 ZC2HC1A       |
| 7.32E-74  | 0.409532948 | 0.56  | 0.275 | 2.35E-69  | 11 AC133644.2    |
| 1.35E-53  | 0.4089218   | 0.887 | 0.671 | 4.34E-49  | 11 FNDC3A        |
| 1.98E-45  | 0.406840763 | 0.632 | 0.392 | 6.36E-41  | 11 LRRC28        |
| 2.22E-58  | 0.406419988 | 0.619 | 0.349 | 7.13E-54  | 11 TEX9          |
| 2.50E-40  | 0.406232441 | 0.76  | 0.524 | 8.04E-36  | 11 HIVEP2        |
| 4.34E-32  | 0.40610853  | 0.463 | 0.285 | 1.39E-27  | 11 ZNF141        |
| 5.10E-39  | 0.404835717 | 0.486 | 0.28  | 1.64E-34  | 11 SCN3A         |
| 7.47E-60  | 0.40419379  | 0.425 | 0.191 | 2.40E-55  | 11 LINC01788     |
| 7.79E-88  | 0.403450548 | 0.373 | 0.134 | 2.50E-83  | 11 AC106795.1    |
| 1.76E-66  | 0.402982959 | 0.507 | 0.249 | 5.65E-62  | 11 GK5           |
| 7.67E-65  | 0.402721494 | 0.56  | 0.293 | 2.46E-60  | 11 DYNC2LI1      |
| 2.02E-62  | 0.402401143 | 0.582 | 0.31  | 6.50E-58  | 11 MBOAT2        |
| 1.73E-74  | 0.401959302 | 0.434 | 0.179 | 5.57E-70  | 11 HSPA1B        |
| 4.03E-58  | 0.401075453 | 0.789 | 0.512 | 1.29E-53  | 11 AC124312.1    |
| 6.48E-47  | 0.400331337 | 0.906 | 0.687 | 2.08E-42  | 11 TRAPPC9       |
| 3.37E-77  | 0.400053511 | 0.427 | 0.176 | 1.08E-72  | 11 AC011447.3    |

|           |             |       |       |            |               |
|-----------|-------------|-------|-------|------------|---------------|
| 3.04E-87  | 0.399717592 | 0.377 | 0.136 | 9.75E-83   | 11 HOXD10     |
| 2.31E-204 | 0.399291719 | 0.268 | 0.04  | 7.41E-200  | 11 OVCH2      |
| 3.32E-58  | 0.39925284  | 0.361 | 0.154 | 1.07E-53   | 11 TFAP2B     |
| 5.17E-34  | 0.398157165 | 0.72  | 0.509 | 1.66E-29   | 11 MAN1A1     |
| 1.08E-107 | 0.39776282  | 0.351 | 0.105 | 3.47E-103  | 11 CCDC88C    |
| 1.03E-36  | 0.397174447 | 0.713 | 0.496 | 3.31E-32   | 11 SMAD2      |
| 7.23E-105 | 0.396437203 | 0.31  | 0.09  | 2.32E-100  | 11 C3orf86    |
| 2.94E-59  | 0.396165018 | 0.813 | 0.513 | 9.45E-55   | 11 OPHN1      |
| 7.24E-129 | 0.395000489 | 0.312 | 0.078 | 2.32E-124  | 11 PGM5P2     |
| 1.74E-70  | 0.394875991 | 0.386 | 0.158 | 5.58E-66   | 11 SYT9       |
| 1.39E-99  | 0.394021194 | 0.3   | 0.087 | 4.48E-95   | 11 HOXD-AS2   |
| 1.60E-59  | 0.393063548 | 0.98  | 0.826 | 5.15E-55   | 11 DDX17      |
| 9.55E-48  | 0.392875258 | 0.407 | 0.202 | 3.07E-43   | 11 PRKCQ      |
| 4.30E-111 | 0.392765141 | 0.338 | 0.098 | 1.38E-106  | 11 FAM3B      |
| 3.30E-29  | 0.392069132 | 0.68  | 0.479 | 1.06E-24   | 11 CYSTM1     |
| 3.10E-53  | 0.391205079 | 0.397 | 0.182 | 9.97E-49   | 11 NEXMIF     |
| 1.28E-83  | 0.390505863 | 0.37  | 0.136 | 4.12E-79   | 11 GPRC5C     |
| 1.43E-73  | 0.389758906 | 0.304 | 0.107 | 4.59E-69   | 11 TBC1D30    |
| 6.99E-99  | 0.389203568 | 0.356 | 0.115 | 2.25E-94   | 11 DMKN       |
| 1.09E-82  | 0.388813526 | 0.463 | 0.191 | 3.51E-78   | 11 FANK1      |
| 2.86E-83  | 0.388495479 | 0.337 | 0.116 | 9.20E-79   | 11 TMEM45B    |
| 6.45E-96  | 0.388319214 | 0.415 | 0.148 | 2.07E-91   | 11 AC243772.3 |
| 2.21E-51  | 0.388316658 | 0.777 | 0.514 | 7.11E-47   | 11 CAB39      |
| 1.83E-141 | 0.386925133 | 0.281 | 0.059 | 5.88E-137  | 11 AL157871.6 |
| 4.28E-73  | 0.386854663 | 0.521 | 0.246 | 1.37E-68   | 11 METTL9     |
| 2.66E-123 | 0.386512656 | 0.535 | 0.192 | 8.53E-119  | 11 PRKCH      |
| 9.71E-55  | 0.386363614 | 0.424 | 0.208 | 3.12E-50   | 11 METAP2     |
| 1.50E-51  | 0.385490567 | 0.399 | 0.191 | 4.81E-47   | 11 LINC01006  |
| 6.03E-53  | 0.384874063 | 0.805 | 0.521 | 1.94E-48   | 11 MAML3      |
| 1.72E-64  | 0.384639386 | 0.672 | 0.366 | 5.51E-60   | 11 AC004593.2 |
| 2.22E-71  | 0.384449711 | 0.322 | 0.119 | 7.13E-67   | 11 BTG3       |
| 1.56E-63  | 0.384369104 | 0.511 | 0.256 | 5.01E-59   | 11 COG7       |
| 8.77E-58  | 0.383887357 | 0.324 | 0.136 | 2.82E-53   | 11 C9orf72    |
| 2.84E-63  | 0.383623243 | 0.436 | 0.198 | 9.11E-59   | 11 CAB39L     |
| 1.77E-27  | 0.383471526 | 0.953 | 0.795 | 5.68E-23   | 11 SOX6       |
| 8.77E-38  | 0.382801754 | 0.759 | 0.515 | 2.82E-33   | 11 ST7        |
| 1.45E-07  | 0.381523391 | 0.394 | 0.323 | 0.00466293 | 11 ACTB       |
| 1.47E-69  | 0.380332205 | 0.445 | 0.2   | 4.72E-65   | 11 REL        |
| 6.90E-51  | 0.379571987 | 0.385 | 0.182 | 2.22E-46   | 11 TWSG1      |
| 5.41E-48  | 0.37945126  | 0.27  | 0.109 | 1.74E-43   | 11 GABRA2     |
| 1.95E-69  | 0.376988456 | 0.307 | 0.113 | 6.26E-65   | 11 CASP9      |
| 1.19E-41  | 0.376225809 | 0.685 | 0.444 | 3.82E-37   | 11 YWHAZ      |
| 4.03E-74  | 0.375576279 | 0.543 | 0.259 | 1.30E-69   | 11 RPH3AL     |
| 5.42E-59  | 0.375406217 | 0.564 | 0.298 | 1.74E-54   | 11 CYS1       |
| 7.94E-32  | 0.374306014 | 0.749 | 0.538 | 2.55E-27   | 11 PELI2      |
| 2.18E-80  | 0.373219862 | 0.332 | 0.118 | 7.01E-76   | 11 TBC1D7     |
| 1.36E-41  | 0.371591281 | 0.524 | 0.312 | 4.36E-37   | 11 MGAT4A     |
| 4.26E-24  | 0.371092132 | 0.365 | 0.219 | 1.37E-19   | 11 NFKBIZ     |
| 3.61E-57  | 0.370938623 | 0.766 | 0.468 | 1.16E-52   | 11 FAAH2      |
| 4.38E-41  | 0.369975129 | 0.939 | 0.682 | 1.41E-36   | 11 FHOD3      |
| 2.69E-52  | 0.369230903 | 0.773 | 0.501 | 8.63E-48   | 11 UACA       |

|          |             |       |       |          |                 |
|----------|-------------|-------|-------|----------|-----------------|
| 3.99E-36 | 0.36901564  | 0.683 | 0.471 | 1.28E-31 | 11 DOP1A        |
| 2.14E-68 | 0.367060927 | 0.513 | 0.244 | 6.88E-64 | 11 PARP8        |
| 1.22E-72 | 0.366693844 | 0.258 | 0.082 | 3.92E-68 | 11 AC009961.1   |
| 1.23E-49 | 0.365286061 | 0.954 | 0.797 | 3.94E-45 | 11 SNHG14       |
| 5.27E-46 | 0.36480522  | 0.511 | 0.286 | 1.69E-41 | 11 LAMC1        |
| 1.26E-42 | 0.364665915 | 0.454 | 0.243 | 4.05E-38 | 11 CASC2        |
| 9.00E-55 | 0.364166988 | 0.652 | 0.389 | 2.89E-50 | 11 CABIN1       |
| 2.49E-68 | 0.362893862 | 0.412 | 0.181 | 8.01E-64 | 11 PRKAR1A      |
| 1.08E-65 | 0.362868995 | 0.429 | 0.19  | 3.46E-61 | 11 ZNF43        |
| 3.44E-99 | 0.362593468 | 0.907 | 0.47  | 1.10E-94 | 11 PDE1A        |
| 5.91E-54 | 0.362432527 | 0.623 | 0.359 | 1.90E-49 | 11 LAMTOR5-AS1  |
| 4.68E-59 | 0.362380164 | 0.901 | 0.607 | 1.50E-54 | 11 KCNIP4       |
| 8.28E-60 | 0.362076383 | 0.362 | 0.153 | 2.66E-55 | 11 TTC39C       |
| 1.25E-48 | 0.361914319 | 0.301 | 0.13  | 4.01E-44 | 11 CD55         |
| 1.49E-70 | 0.360618744 | 0.338 | 0.126 | 4.78E-66 | 11 TET1         |
| 1.24E-39 | 0.360351012 | 0.836 | 0.613 | 3.99E-35 | 11 WAC          |
| 2.68E-60 | 0.359755699 | 0.588 | 0.318 | 8.60E-56 | 11 PRDM2        |
| 2.25E-57 | 0.358822798 | 0.76  | 0.457 | 7.22E-53 | 11 PRR5-ARHGAP8 |
| 1.92E-43 | 0.358797375 | 0.749 | 0.473 | 6.16E-39 | 11 GALNT18      |
| 2.94E-37 | 0.358616718 | 0.602 | 0.381 | 9.43E-33 | 11 MINDY2       |
| 1.26E-38 | 0.357359268 | 0.784 | 0.558 | 4.04E-34 | 11 METTL15      |
| 6.44E-45 | 0.35692316  | 0.443 | 0.239 | 2.07E-40 | 11 RGPD4        |
| 2.74E-58 | 0.355930937 | 0.545 | 0.288 | 8.79E-54 | 11 EIPR1        |
| 7.37E-54 | 0.354553537 | 0.407 | 0.195 | 2.37E-49 | 11 EPCAM        |
| 8.50E-33 | 0.353826849 | 0.633 | 0.419 | 2.73E-28 | 11 HLCS         |
| 8.46E-48 | 0.353227902 | 0.802 | 0.499 | 2.72E-43 | 11 SKAP1        |
| 7.25E-37 | 0.352342643 | 0.856 | 0.646 | 2.33E-32 | 11 ZMYM2        |
| 6.18E-76 | 0.352316681 | 0.349 | 0.129 | 1.99E-71 | 11 JUND         |
| 7.23E-46 | 0.352182227 | 0.735 | 0.488 | 2.32E-41 | 11 SMAD3        |
| 1.74E-42 | 0.351950862 | 0.768 | 0.523 | 5.58E-38 | 11 UBAC2        |
| 5.31E-56 | 0.351864657 | 0.454 | 0.221 | 1.71E-51 | 11 AGPAT5       |
| 5.16E-40 | 0.349949354 | 0.971 | 0.812 | 1.66E-35 | 11 NEDD4L       |
| 2.00E-27 | 0.349213895 | 0.891 | 0.693 | 6.42E-23 | 11 TEAD1        |
| 2.43E-59 | 0.349133617 | 0.38  | 0.166 | 7.82E-55 | 11 FZD4         |
| 1.46E-36 | 0.349039966 | 0.641 | 0.423 | 4.68E-32 | 11 ATP11B       |
| 1.30E-41 | 0.346980521 | 0.402 | 0.214 | 4.18E-37 | 11 RGPD1        |
| 1.93E-49 | 0.34672691  | 0.389 | 0.184 | 6.19E-45 | 11 DENND3       |
| 1.51E-34 | 0.344642612 | 0.352 | 0.185 | 4.86E-30 | 11 STAT1        |
| 5.22E-51 | 0.344411867 | 0.527 | 0.287 | 1.68E-46 | 11 ZNF420       |
| 8.31E-44 | 0.34431488  | 0.52  | 0.298 | 2.67E-39 | 11 NAA50        |
| 1.79E-48 | 0.34430462  | 0.535 | 0.296 | 5.74E-44 | 11 DAP          |
| 1.08E-55 | 0.344218064 | 0.591 | 0.322 | 3.48E-51 | 11 CFAP221      |
| 2.49E-45 | 0.342981586 | 0.88  | 0.65  | 7.98E-41 | 11 MAP4         |
| 6.01E-43 | 0.342768185 | 0.579 | 0.346 | 1.93E-38 | 11 FBXL2        |
| 6.49E-35 | 0.342114059 | 0.69  | 0.475 | 2.08E-30 | 11 ZFYVE16      |
| 4.34E-52 | 0.341448146 | 0.89  | 0.623 | 1.39E-47 | 11 TBC1D1       |
| 6.91E-53 | 0.340642386 | 0.541 | 0.287 | 2.22E-48 | 11 TUSC3        |
| 8.48E-52 | 0.340273879 | 0.492 | 0.26  | 2.72E-47 | 11 SLC22A4      |
| 1.38E-46 | 0.339649628 | 0.293 | 0.128 | 4.42E-42 | 11 PRMT9        |
| 2.89E-37 | 0.339592827 | 0.7   | 0.472 | 9.27E-33 | 11 MARCHF7      |
| 1.81E-41 | 0.336841309 | 0.959 | 0.823 | 5.80E-37 | 11 ZFAND3       |

|           |             |       |       |           |               |
|-----------|-------------|-------|-------|-----------|---------------|
| 9.44E-54  | 0.335011839 | 0.346 | 0.15  | 3.03E-49  | 11 AC117834.1 |
| 3.50E-44  | 0.334826302 | 0.833 | 0.592 | 1.12E-39  | 11 TMEM131    |
| 3.32E-74  | 0.334757132 | 0.526 | 0.231 | 1.07E-69  | 11 EMX1       |
| 9.73E-41  | 0.334507005 | 0.415 | 0.219 | 3.13E-36  | 11 AC027097.2 |
| 3.42E-31  | 0.334494878 | 0.819 | 0.614 | 1.10E-26  | 11 TBL1XR1    |
| 5.56E-52  | 0.334388512 | 0.533 | 0.283 | 1.78E-47  | 11 AL050309.1 |
| 1.24E-56  | 0.33432628  | 0.363 | 0.161 | 3.98E-52  | 11 PPP2R1A    |
| 1.61E-36  | 0.334062215 | 0.773 | 0.541 | 5.17E-32  | 11 ROCK2      |
| 4.21E-35  | 0.333696135 | 0.414 | 0.234 | 1.35E-30  | 11 RGPD2      |
| 8.02E-72  | 0.332837926 | 0.308 | 0.11  | 2.58E-67  | 11 TLE3       |
| 2.80E-63  | 0.332601858 | 0.438 | 0.201 | 9.01E-59  | 11 GSTM4      |
| 9.35E-61  | 0.330977992 | 0.323 | 0.129 | 3.00E-56  | 11 SNAPC1     |
| 5.84E-48  | 0.330808058 | 0.521 | 0.282 | 1.88E-43  | 11 FAM117B    |
| 1.38E-38  | 0.330597993 | 0.326 | 0.156 | 4.44E-34  | 11 PAPSS2     |
| 9.31E-60  | 0.330098285 | 0.382 | 0.172 | 2.99E-55  | 11 TMEM50B    |
| 5.93E-17  | 0.329826394 | 0.677 | 0.509 | 1.90E-12  | 11 BCKDHB     |
| 1.90E-44  | 0.329684729 | 0.352 | 0.167 | 6.10E-40  | 11 LHFPL3-AS2 |
| 1.92E-48  | 0.329394519 | 0.795 | 0.498 | 6.15E-44  | 11 WDFY2      |
| 3.18E-34  | 0.329047064 | 0.728 | 0.484 | 1.02E-29  | 11 MFHAS1     |
| 4.26E-66  | 0.328918134 | 0.287 | 0.1   | 1.37E-61  | 11 IER3       |
| 4.64E-47  | 0.328820488 | 0.53  | 0.302 | 1.49E-42  | 11 ELP2       |
| 4.97E-41  | 0.328700761 | 0.482 | 0.273 | 1.60E-36  | 11 SMAD1      |
| 3.48E-62  | 0.327950439 | 0.445 | 0.2   | 1.12E-57  | 11 PRDM5      |
| 3.18E-57  | 0.326349421 | 0.447 | 0.213 | 1.02E-52  | 11 PPM1K      |
| 3.03E-17  | 0.326188798 | 0.343 | 0.224 | 9.74E-13  | 11 RCAN1      |
| 8.73E-125 | 0.325257126 | 0.46  | 0.143 | 2.80E-120 | 11 DOCK10     |
| 3.73E-41  | 0.324394423 | 0.565 | 0.338 | 1.20E-36  | 11 PER1       |
| 2.93E-58  | 0.324130127 | 0.39  | 0.171 | 9.41E-54  | 11 POU5F1     |
| 3.52E-60  | 0.324045091 | 0.333 | 0.135 | 1.13E-55  | 11 SMCO4      |
| 3.42E-48  | 0.324042197 | 0.557 | 0.307 | 1.10E-43  | 11 ADCY9      |
| 6.92E-56  | 0.324041205 | 0.669 | 0.369 | 2.22E-51  | 11 GLDC       |
| 2.64E-40  | 0.323959439 | 0.591 | 0.363 | 8.47E-36  | 11 TBC1D32    |
| 3.99E-39  | 0.322997833 | 0.906 | 0.698 | 1.28E-34  | 11 NCOR1      |
| 5.02E-73  | 0.322822246 | 0.409 | 0.165 | 1.61E-68  | 11 ABO        |
| 2.06E-25  | 0.321956441 | 0.34  | 0.196 | 6.61E-21  | 11 GADD45B    |
| 2.91E-39  | 0.321331959 | 0.788 | 0.547 | 9.35E-35  | 11 MRTFA      |
| 1.36E-28  | 0.320378126 | 0.736 | 0.529 | 4.36E-24  | 11 MRPL33     |
| 1.57E-40  | 0.320172579 | 0.672 | 0.425 | 5.03E-36  | 11 CMAHP      |
| 8.90E-60  | 0.318710229 | 0.444 | 0.206 | 2.86E-55  | 11 HYDIN2     |
| 2.33E-43  | 0.318635753 | 0.453 | 0.244 | 7.48E-39  | 11 SIMC1      |
| 2.56E-50  | 0.318566885 | 0.276 | 0.112 | 8.23E-46  | 11 UCK2       |
| 8.52E-45  | 0.318433348 | 0.502 | 0.281 | 2.74E-40  | 11 FP236241.1 |
| 6.27E-50  | 0.318397585 | 0.465 | 0.244 | 2.01E-45  | 11 SLC35A3    |
| 3.68E-46  | 0.318270863 | 0.689 | 0.405 | 1.18E-41  | 11 SPATS2L    |
| 1.03E-22  | 0.318143496 | 0.651 | 0.452 | 3.31E-18  | 11 SCN2A      |
| 2.60E-27  | 0.318107001 | 0.513 | 0.337 | 8.34E-23  | 11 AGO2       |
| 2.57E-89  | 0.316508645 | 0.269 | 0.078 | 8.26E-85  | 11 FRG1JP     |
| 8.00E-44  | 0.316152199 | 0.845 | 0.599 | 2.57E-39  | 11 CD2AP      |
| 4.01E-52  | 0.315493661 | 0.777 | 0.47  | 1.29E-47  | 11 MYO1D      |
| 6.61E-29  | 0.314847837 | 0.901 | 0.708 | 2.12E-24  | 11 NCOA2      |
| 4.08E-48  | 0.3143803   | 0.409 | 0.206 | 1.31E-43  | 11 RNF114     |



|          |             |       |       |          |               |
|----------|-------------|-------|-------|----------|---------------|
| 2.02E-79 | 0.313611488 | 0.313 | 0.107 | 6.49E-75 | 11 AC003688.1 |
| 5.33E-37 | 0.312887628 | 0.731 | 0.508 | 1.71E-32 | 11 STAG2      |
| 2.36E-88 | 0.311939452 | 0.41  | 0.148 | 7.59E-84 | 11 TBX2       |
| 6.68E-24 | 0.311555834 | 0.73  | 0.534 | 2.14E-19 | 11 STAT3      |
| 1.19E-51 | 0.310839481 | 0.806 | 0.498 | 3.82E-47 | 11 KIFC3      |
| 2.02E-41 | 0.310814585 | 0.681 | 0.432 | 6.48E-37 | 11 CCDC171    |
| 1.39E-50 | 0.310189235 | 0.46  | 0.235 | 4.45E-46 | 11 ITPK1      |
| 2.82E-47 | 0.309508367 | 0.76  | 0.489 | 9.05E-43 | 11 CBR4       |
| 1.87E-45 | 0.309334524 | 0.736 | 0.463 | 6.01E-41 | 11 EPB41L1    |
| 6.86E-32 | 0.308606833 | 0.747 | 0.521 | 2.20E-27 | 11 AF117829.1 |
| 3.09E-44 | 0.30850267  | 0.57  | 0.323 | 9.93E-40 | 11 MCC        |
| 1.22E-61 | 0.308446337 | 0.326 | 0.129 | 3.90E-57 | 11 ZNF100     |
| 4.71E-58 | 0.308052245 | 0.318 | 0.13  | 1.51E-53 | 11 LINC01226  |
| 1.35E-34 | 0.307605201 | 0.787 | 0.564 | 4.35E-30 | 11 LARP4B     |
| 3.02E-52 | 0.307241667 | 0.307 | 0.127 | 9.69E-48 | 11 EPOR       |
| 1.35E-40 | 0.306942239 | 0.544 | 0.321 | 4.32E-36 | 11 NR2F2-AS1  |
| 7.93E-32 | 0.306864003 | 0.842 | 0.637 | 2.55E-27 | 11 EPB41L5    |
| 2.68E-49 | 0.306374556 | 0.434 | 0.215 | 8.61E-45 | 11 DNAH6      |
| 6.16E-39 | 0.305524677 | 0.523 | 0.298 | 1.98E-34 | 11 CHPT1      |
| 1.76E-67 | 0.30478558  | 0.276 | 0.094 | 5.65E-63 | 11 FAM241A    |
| 2.56E-46 | 0.304782056 | 0.667 | 0.392 | 8.22E-42 | 11 ABCC5      |
| 8.01E-35 | 0.3043664   | 0.836 | 0.608 | 2.57E-30 | 11 PUM1       |
| 1.02E-41 | 0.304305413 | 0.7   | 0.464 | 3.27E-37 | 11 TNRC18     |
| 3.09E-25 | 0.303665389 | 0.861 | 0.67  | 9.92E-21 | 11 DLG1       |
| 1.35E-41 | 0.30355344  | 0.513 | 0.292 | 4.34E-37 | 11 RTN3       |
| 1.09E-34 | 0.302017425 | 0.894 | 0.673 | 3.50E-30 | 11 EIF4G3     |
| 1.22E-33 | 0.301487714 | 0.961 | 0.831 | 3.93E-29 | 11 MBD5       |
| 4.01E-78 | 0.300965799 | 0.437 | 0.178 | 1.29E-73 | 11 RECQL5     |
| 1.80E-24 | 0.300053396 | 0.809 | 0.595 | 5.79E-20 | 11 FOXO1      |
| 1.36E-49 | 0.299963656 | 0.532 | 0.291 | 4.38E-45 | 11 LINC00623  |
| 4.74E-45 | 0.299874656 | 0.483 | 0.263 | 1.52E-40 | 11 DCTN4      |
| 3.64E-21 | 0.299402933 | 0.377 | 0.235 | 1.17E-16 | 11 ATP11C     |
| 8.13E-78 | 0.299349557 | 0.313 | 0.105 | 2.61E-73 | 11 CWH43      |
| 6.85E-40 | 0.299322161 | 0.448 | 0.249 | 2.20E-35 | 11 MGST3      |
| 6.42E-45 | 0.299176051 | 0.396 | 0.199 | 2.06E-40 | 11 CLHC1      |
| 1.18E-56 | 0.299098492 | 0.303 | 0.119 | 3.80E-52 | 11 RASEF      |
| 9.02E-36 | 0.297270768 | 0.689 | 0.453 | 2.90E-31 | 11 PPA2       |
| 6.92E-35 | 0.296372045 | 0.6   | 0.385 | 2.22E-30 | 11 PARD6B     |
| 4.06E-89 | 0.29620366  | 0.278 | 0.081 | 1.30E-84 | 11 SCAMP5     |
| 4.45E-46 | 0.295509589 | 0.76  | 0.481 | 1.43E-41 | 11 RALGPS2    |
| 9.52E-40 | 0.295209036 | 0.371 | 0.189 | 3.06E-35 | 11 RAB27A     |
| 4.99E-33 | 0.294664869 | 0.738 | 0.51  | 1.60E-28 | 11 PDSS2      |
| 6.00E-49 | 0.294581665 | 0.371 | 0.173 | 1.93E-44 | 11 ESRP1      |
| 1.88E-70 | 0.294075129 | 0.279 | 0.094 | 6.05E-66 | 11 TTC26      |
| 9.33E-42 | 0.294052573 | 0.687 | 0.434 | 3.00E-37 | 11 IQGAP1     |
| 6.82E-20 | 0.293967649 | 0.68  | 0.514 | 2.19E-15 | 11 CCNL1      |
| 1.09E-39 | 0.293926469 | 0.583 | 0.348 | 3.51E-35 | 11 RAP1GAP2   |
| 4.49E-34 | 0.293774565 | 0.825 | 0.585 | 1.44E-29 | 11 ANKRD10    |
| 1.60E-36 | 0.29353947  | 0.797 | 0.564 | 5.15E-32 | 11 PHKB       |
| 2.09E-36 | 0.292547227 | 0.371 | 0.198 | 6.71E-32 | 11 UQCRH      |
| 2.43E-42 | 0.29240744  | 0.434 | 0.233 | 7.81E-38 | 11 NCK2       |

|          |             |       |       |          |               |
|----------|-------------|-------|-------|----------|---------------|
| 5.03E-31 | 0.291286109 | 0.358 | 0.2   | 1.61E-26 | 11 TMEM184C   |
| 4.54E-43 | 0.290581656 | 0.462 | 0.244 | 1.46E-38 | 11 MARK1      |
| 4.42E-55 | 0.290404148 | 0.353 | 0.152 | 1.42E-50 | 11 C5AR1      |
| 9.80E-29 | 0.289922274 | 0.658 | 0.46  | 3.15E-24 | 11 MAP2K5     |
| 1.23E-50 | 0.289057767 | 0.32  | 0.139 | 3.94E-46 | 11 CXADR      |
| 4.23E-70 | 0.288892404 | 0.265 | 0.087 | 1.36E-65 | 11 EEF2K      |
| 1.44E-34 | 0.288351534 | 0.625 | 0.404 | 4.63E-30 | 11 ACACA      |
| 4.11E-42 | 0.288253403 | 0.809 | 0.552 | 1.32E-37 | 11 KIF13B     |
| 2.28E-29 | 0.287497522 | 0.915 | 0.708 | 7.33E-25 | 11 BRAF       |
| 3.55E-40 | 0.287420605 | 0.35  | 0.177 | 1.14E-35 | 11 NAPA       |
| 7.61E-28 | 0.287342799 | 0.812 | 0.588 | 2.44E-23 | 11 DAB1       |
| 9.35E-61 | 0.286429425 | 0.357 | 0.146 | 3.00E-56 | 11 LHX1-DT    |
| 1.29E-28 | 0.286382586 | 0.832 | 0.625 | 4.16E-24 | 11 TTC3       |
| 2.65E-83 | 0.286363559 | 0.254 | 0.073 | 8.53E-79 | 11 FAM124A    |
| 1.79E-26 | 0.285844864 | 0.942 | 0.775 | 5.75E-22 | 11 SETBP1     |
| 3.57E-61 | 0.285738982 | 0.32  | 0.125 | 1.15E-56 | 11 CDKL2      |
| 2.73E-52 | 0.285373581 | 0.327 | 0.142 | 8.76E-48 | 11 AC107068.2 |
| 6.13E-41 | 0.285314831 | 0.353 | 0.174 | 1.97E-36 | 11 ZC3H12B    |
| 1.18E-30 | 0.285047509 | 0.925 | 0.73  | 3.79E-26 | 11 MYO6       |
| 1.26E-32 | 0.28488291  | 0.553 | 0.349 | 4.04E-28 | 11 EFCAB6     |
| 9.47E-28 | 0.284691407 | 0.62  | 0.412 | 3.04E-23 | 11 LHFPL3     |
| 2.71E-59 | 0.282434971 | 0.302 | 0.115 | 8.70E-55 | 11 JAM3       |
| 7.65E-26 | 0.281781221 | 0.899 | 0.726 | 2.46E-21 | 11 SMYD3      |
| 7.06E-30 | 0.281733151 | 0.715 | 0.508 | 2.27E-25 | 11 TASP1      |
| 1.29E-51 | 0.281578134 | 0.317 | 0.134 | 4.14E-47 | 11 SOGA1      |
| 1.33E-38 | 0.28139513  | 0.342 | 0.171 | 4.26E-34 | 11 SLC25A30   |
| 1.72E-54 | 0.281394402 | 0.456 | 0.222 | 5.53E-50 | 11 ABCC1      |
| 1.06E-27 | 0.281340978 | 0.284 | 0.15  | 3.40E-23 | 11 CA2        |
| 1.91E-20 | 0.280120862 | 0.753 | 0.575 | 6.14E-16 | 11 USP9X      |
| 1.30E-61 | 0.280061131 | 0.301 | 0.113 | 4.19E-57 | 11 AC015908.7 |
| 7.37E-35 | 0.279601003 | 0.706 | 0.478 | 2.37E-30 | 11 GPBP1L1    |
| 1.08E-57 | 0.278939608 | 0.384 | 0.171 | 3.45E-53 | 11 ZSCAN18    |
| 8.14E-29 | 0.278505922 | 0.598 | 0.392 | 2.61E-24 | 11 CMSS1      |
| 5.56E-24 | 0.278330431 | 0.999 | 0.949 | 1.79E-19 | 11 RASGEF1B   |
| 3.15E-30 | 0.275859435 | 0.648 | 0.431 | 1.01E-25 | 11 ZNF827     |
| 9.96E-58 | 0.275536246 | 0.303 | 0.119 | 3.20E-53 | 11 AC092821.3 |
| 8.36E-43 | 0.274590833 | 0.3   | 0.132 | 2.69E-38 | 11 NDST3      |
| 3.50E-45 | 0.274379485 | 0.612 | 0.359 | 1.12E-40 | 11 ODF2L      |
| 3.53E-49 | 0.274181774 | 0.348 | 0.156 | 1.13E-44 | 11 LINC00963  |
| 1.33E-30 | 0.274035744 | 0.803 | 0.565 | 4.26E-26 | 11 MRTFB      |
| 1.39E-32 | 0.27387642  | 0.514 | 0.313 | 4.48E-28 | 11 RAB11FIP2  |
| 1.31E-38 | 0.273662279 | 0.348 | 0.178 | 4.20E-34 | 11 VTI1B      |
| 6.47E-13 | 0.273605553 | 0.307 | 0.203 | 2.08E-08 | 11 FSTL4      |
| 2.00E-31 | 0.273001071 | 0.639 | 0.423 | 6.41E-27 | 11 TTLL5      |
| 1.56E-36 | 0.272816022 | 0.745 | 0.496 | 5.02E-32 | 11 RFX3       |
| 1.16E-64 | 0.272646266 | 0.394 | 0.165 | 3.74E-60 | 11 SH3GLB2    |
| 1.05E-38 | 0.272612437 | 0.338 | 0.168 | 3.37E-34 | 11 SCOC       |
| 1.50E-56 | 0.272532297 | 0.264 | 0.097 | 4.80E-52 | 11 AC139795.2 |
| 2.72E-39 | 0.271948327 | 0.489 | 0.271 | 8.72E-35 | 11 ANKRD6     |
| 1.33E-35 | 0.271864316 | 0.613 | 0.381 | 4.28E-31 | 11 HNF1B      |
| 3.11E-42 | 0.271476772 | 0.591 | 0.353 | 9.98E-38 | 11 WDSUB1     |

|          |             |       |       |          |                 |
|----------|-------------|-------|-------|----------|-----------------|
| 2.12E-31 | 0.270909856 | 0.613 | 0.396 | 6.79E-27 | 11 URI1         |
| 4.26E-64 | 0.270788878 | 0.388 | 0.161 | 1.37E-59 | 11 CLEC2D       |
| 3.80E-54 | 0.270306262 | 0.302 | 0.123 | 1.22E-49 | 11 OR2A20P      |
| 7.59E-29 | 0.270205196 | 0.872 | 0.668 | 2.44E-24 | 11 MAP4K3       |
| 1.98E-58 | 0.269374119 | 0.309 | 0.122 | 6.34E-54 | 11 STX2         |
| 4.15E-36 | 0.269306476 | 0.7   | 0.458 | 1.33E-31 | 11 SREBF2       |
| 4.31E-24 | 0.269181645 | 0.542 | 0.352 | 1.38E-19 | 11 GABARAPL1    |
| 5.96E-47 | 0.268989903 | 0.425 | 0.211 | 1.91E-42 | 11 ZNRF1        |
| 2.68E-26 | 0.268941406 | 0.72  | 0.509 | 8.60E-22 | 11 RPRD2        |
| 2.13E-35 | 0.26840874  | 0.642 | 0.413 | 6.86E-31 | 11 TCAIM        |
| 1.28E-57 | 0.268316567 | 0.265 | 0.097 | 4.11E-53 | 11 GPRC5B       |
| 8.93E-48 | 0.267823027 | 0.602 | 0.341 | 2.87E-43 | 11 ABHD15-AS1   |
| 2.74E-64 | 0.267637377 | 0.421 | 0.182 | 8.79E-60 | 11 DNAAF4-CCPG1 |
| 2.21E-38 | 0.26748692  | 0.656 | 0.414 | 7.11E-34 | 11 TPTE2P5      |
| 6.25E-23 | 0.266851841 | 0.369 | 0.224 | 2.01E-18 | 11 AL359710.1   |
| 1.35E-35 | 0.266732696 | 0.717 | 0.476 | 4.34E-31 | 11 FMNL2        |
| 2.96E-29 | 0.266713468 | 0.652 | 0.447 | 9.49E-25 | 11 AP1G1        |
| 5.09E-29 | 0.266194825 | 0.297 | 0.157 | 1.63E-24 | 11 EIF4H        |
| 1.06E-35 | 0.26534043  | 0.567 | 0.353 | 3.41E-31 | 11 KATNBL1      |
| 6.41E-30 | 0.26464455  | 0.409 | 0.24  | 2.06E-25 | 11 AP3S1        |
| 3.00E-30 | 0.264347328 | 0.713 | 0.496 | 9.62E-26 | 11 PHF21A       |
| 2.03E-25 | 0.263792952 | 0.614 | 0.42  | 6.53E-21 | 11 SLX4IP       |
| 1.00E-29 | 0.263322492 | 0.735 | 0.499 | 3.22E-25 | 11 RREB1        |
| 6.76E-27 | 0.262576482 | 0.74  | 0.541 | 2.17E-22 | 11 HUWE1        |
| 1.99E-46 | 0.262523854 | 0.337 | 0.158 | 6.39E-42 | 11 AC011043.1   |
| 2.25E-45 | 0.262495711 | 0.389 | 0.184 | 7.22E-41 | 11 MBOAT1       |
| 1.98E-27 | 0.262443088 | 0.337 | 0.19  | 6.37E-23 | 11 G3BP2        |
| 2.01E-19 | 0.261975394 | 0.93  | 0.78  | 6.46E-15 | 11 BCAS3        |
| 3.35E-34 | 0.261602469 | 0.589 | 0.368 | 1.08E-29 | 11 FAR1         |
| 1.78E-42 | 0.261541895 | 0.497 | 0.276 | 5.72E-38 | 11 CLIP4        |
| 4.41E-30 | 0.260707201 | 0.323 | 0.17  | 1.41E-25 | 11 PLPP4        |
| 1.71E-32 | 0.260376742 | 0.702 | 0.469 | 5.49E-28 | 11 CCDC7        |
| 6.52E-26 | 0.260253113 | 0.96  | 0.817 | 2.09E-21 | 11 PCCA         |
| 3.67E-40 | 0.260121374 | 0.672 | 0.412 | 1.18E-35 | 11 GTF2IRD1     |
| 1.05E-47 | 0.259844089 | 0.713 | 0.432 | 3.37E-43 | 11 RGL3         |
| 1.30E-38 | 0.259836061 | 0.355 | 0.176 | 4.17E-34 | 11 SPATA17      |
| 1.02E-32 | 0.259033413 | 0.357 | 0.19  | 3.28E-28 | 11 SEMA4B       |
| 7.84E-22 | 0.258814887 | 0.356 | 0.216 | 2.52E-17 | 11 EIF2AK3      |
| 8.63E-22 | 0.258235438 | 0.699 | 0.522 | 2.77E-17 | 11 FGF7P3       |
| 5.07E-46 | 0.257921195 | 0.508 | 0.268 | 1.63E-41 | 11 PFKP         |
| 1.96E-23 | 0.257519298 | 0.893 | 0.718 | 6.30E-19 | 11 KANSL1L      |
| 1.08E-14 | 0.257284354 | 0.357 | 0.234 | 3.47E-10 | 11 ANKS1B       |
| 2.41E-29 | 0.256265983 | 0.78  | 0.562 | 7.72E-25 | 11 UGGT2        |
| 2.07E-35 | 0.255954465 | 0.642 | 0.419 | 6.64E-31 | 11 NUP98        |
| 8.62E-28 | 0.255785139 | 0.605 | 0.412 | 2.77E-23 | 11 RELCH        |
| 2.61E-15 | 0.25543455  | 0.445 | 0.323 | 8.38E-11 | 11 LINC00278    |
| 3.35E-46 | 0.254795707 | 0.464 | 0.24  | 1.07E-41 | 11 SSH1         |
| 3.63E-47 | 0.254522276 | 0.363 | 0.172 | 1.17E-42 | 11 NELFA        |
| 3.67E-25 | 0.254008621 | 0.705 | 0.506 | 1.18E-20 | 11 DENND1B      |
| 2.48E-36 | 0.253717228 | 0.974 | 0.834 | 7.97E-32 | 11 PARD3        |
| 3.75E-26 | 0.253136873 | 0.905 | 0.725 | 1.20E-21 | 11 STAG1        |

|           |             |       |       |           |               |
|-----------|-------------|-------|-------|-----------|---------------|
| 8.47E-32  | 0.252765858 | 0.298 | 0.151 | 2.72E-27  | 11 ZDBF2      |
| 5.74E-27  | 0.252613937 | 0.895 | 0.702 | 1.84E-22  | 11 STK3       |
| 5.39E-56  | 0.252371301 | 0.339 | 0.139 | 1.73E-51  | 11 LHX1       |
| 9.10E-62  | 0.252257335 | 0.261 | 0.09  | 2.92E-57  | 11 PLSR2      |
| 2.26E-28  | 0.251265834 | 0.66  | 0.453 | 7.26E-24  | 11 ARHGAP12   |
| 4.19E-46  | 0.25094965  | 0.398 | 0.198 | 1.35E-41  | 11 PDHA1      |
| 5.99E-47  | 0.250787299 | 0.287 | 0.119 | 1.92E-42  | 11 TFAP2A     |
| 3.69E-39  | 0.25011389  | 0.274 | 0.124 | 1.18E-34  | 11 PABPC4     |
| 0         | 4.29711234  | 0.902 | 0.092 | 0         | 12 LINC01435  |
| 0         | 4.235816242 | 0.954 | 0.276 | 0         | 12 ALDH1A2    |
| 0         | 3.393745269 | 0.899 | 0.029 | 0         | 12 CFH        |
| 0         | 3.383059117 | 0.881 | 0.072 | 0         | 12 KCNT2      |
| 0         | 3.253026436 | 0.924 | 0.389 | 0         | 12 FRMD4A     |
| 0         | 3.245317326 | 0.629 | 0.031 | 0         | 12 KIRREL3    |
| 0         | 3.137194376 | 0.692 | 0.123 | 0         | 12 GRM5       |
| 0         | 3.011248323 | 0.886 | 0.164 | 0         | 12 ZFPM2      |
| 0         | 2.807685834 | 0.498 | 0.057 | 0         | 12 VCAM1      |
| 0         | 2.730025888 | 0.855 | 0.164 | 0         | 12 FBXL7      |
| 0         | 2.703262662 | 0.839 | 0.218 | 0         | 12 NRG3       |
| 0         | 2.586751714 | 0.804 | 0.099 | 0         | 12 TSHZ2      |
| 5.87E-265 | 2.571865801 | 0.816 | 0.303 | 1.88E-260 | 12 RBFOX1     |
| 0         | 2.463116055 | 0.568 | 0.028 | 0         | 12 CLDN1      |
| 0         | 2.444742035 | 0.817 | 0.161 | 0         | 12 TENM3      |
| 1.19E-305 | 2.333938609 | 0.42  | 0.062 | 3.83E-301 | 12 CADM2      |
| 0         | 2.314402591 | 0.742 | 0.109 | 0         | 12 SLIT3      |
| 0         | 2.270346741 | 0.846 | 0.221 | 0         | 12 KCNMB2     |
| 0         | 2.263612907 | 0.496 | 0.045 | 0         | 12 CCN2       |
| 0         | 2.235524924 | 0.908 | 0.374 | 0         | 12 RERG       |
| 1.12E-277 | 2.230828459 | 0.885 | 0.411 | 3.59E-273 | 12 BICD1      |
| 1.95E-208 | 2.220229322 | 0.889 | 0.565 | 6.25E-204 | 12 CRIM1      |
| 0         | 2.189920055 | 0.439 | 0.016 | 0         | 12 PDLIM3     |
| 0         | 2.182531904 | 0.506 | 0.091 | 0         | 12 MGAT4C     |
| 0         | 2.158163543 | 0.799 | 0.156 | 0         | 12 BX571818.1 |
| 2.63E-218 | 2.143579232 | 0.515 | 0.127 | 8.44E-214 | 12 ATF3       |
| 0         | 2.138969542 | 0.812 | 0.246 | 0         | 12 ARHGAP10   |
| 0         | 2.136673554 | 0.719 | 0.099 | 0         | 12 ITGB3      |
| 0         | 2.133315795 | 0.689 | 0.075 | 0         | 12 MSC-AS1    |
| 0         | 2.12026997  | 0.794 | 0.246 | 0         | 12 TPM1       |
| 0         | 2.086486135 | 0.765 | 0.223 | 0         | 12 AC068234.1 |
| 6.94E-124 | 2.084634183 | 0.604 | 0.258 | 2.23E-119 | 12 HOMER1     |
| 1.17E-303 | 2.072564532 | 0.909 | 0.42  | 3.75E-299 | 12 OSBPL10    |
| 0         | 2.068286134 | 0.445 | 0.007 | 0         | 12 SLC4A11    |
| 0         | 2.064887668 | 0.715 | 0.119 | 0         | 12 AKAP12     |
| 0         | 2.051907073 | 0.659 | 0.059 | 0         | 12 AC003984.1 |
| 1.23E-270 | 2.041409832 | 0.78  | 0.264 | 3.94E-266 | 12 CTTNBP2    |
| 2.34E-218 | 1.988722378 | 0.922 | 0.474 | 7.50E-214 | 12 PDE1A      |
| 0         | 1.987455867 | 0.479 | 0.037 | 0         | 12 ANXA1      |
| 3.66E-190 | 1.974833419 | 0.711 | 0.297 | 1.18E-185 | 12 UGCG       |
| 0         | 1.944943827 | 0.584 | 0.081 | 0         | 12 TMEM163    |
| 0         | 1.939041499 | 0.764 | 0.213 | 0         | 12 TSPAN5     |
| 1.10E-233 | 1.938237655 | 0.586 | 0.161 | 3.54E-229 | 12 RFX2       |

|           |             |       |       |           |               |
|-----------|-------------|-------|-------|-----------|---------------|
| 0         | 1.931437103 | 0.473 | 0.056 | 0         | 12 AC007744.1 |
| 4.18E-238 | 1.91968305  | 0.853 | 0.363 | 1.34E-233 | 12 ITGB8      |
| 2.89E-103 | 1.90391286  | 0.482 | 0.195 | 9.27E-99  | 12 LMNA       |
| 2.36E-167 | 1.879712269 | 0.443 | 0.114 | 7.59E-163 | 12 CRYAB      |
| 6.69E-90  | 1.860658944 | 0.524 | 0.243 | 2.15E-85  | 12 AC012593.1 |
| 4.16E-158 | 1.855239387 | 0.696 | 0.317 | 1.34E-153 | 12 KLF6       |
| 0         | 1.848725587 | 0.712 | 0.14  | 0         | 12 SIPA1L2    |
| 0         | 1.831705419 | 0.669 | 0.096 | 0         | 12 ADGRG6     |
| 4.54E-161 | 1.826330786 | 0.744 | 0.364 | 1.46E-156 | 12 TGFBR2     |
| 7.56E-240 | 1.824789415 | 0.329 | 0.047 | 2.43E-235 | 12 MDGA2      |
| 0         | 1.822240444 | 0.483 | 0.042 | 0         | 12 LRFN5      |
| 3.28E-262 | 1.797269425 | 0.758 | 0.253 | 1.05E-257 | 12 FAM189A1   |
| 7.94E-289 | 1.778051019 | 0.855 | 0.304 | 2.55E-284 | 12 DUSP1      |
| 8.92E-155 | 1.772583809 | 0.42  | 0.112 | 2.87E-150 | 12 SLC35F4    |
| 7.84E-263 | 1.766506193 | 0.967 | 0.667 | 2.52E-258 | 12 SYNE1      |
| 2.17E-170 | 1.738424886 | 0.715 | 0.327 | 6.97E-166 | 12 AL139807.1 |
| 0         | 1.732553511 | 0.335 | 0.027 | 0         | 12 TNC        |
| 2.58E-209 | 1.716243204 | 0.845 | 0.383 | 8.28E-205 | 12 CNTN4      |
| 0         | 1.697966955 | 0.563 | 0.081 | 0         | 12 MAP2       |
| 1.31E-174 | 1.673252366 | 0.816 | 0.436 | 4.19E-170 | 12 FAT1       |
| 0         | 1.660571714 | 0.404 | 0.027 | 0         | 12 CRISPLD2   |
| 1.85E-155 | 1.648058586 | 0.882 | 0.564 | 5.93E-151 | 12 DCDC2      |
| 0         | 1.635912285 | 0.604 | 0.074 | 0         | 12 MIR31HG    |
| 5.66E-205 | 1.630313938 | 0.584 | 0.172 | 1.82E-200 | 12 IL1R1      |
| 1.17E-173 | 1.62450059  | 0.505 | 0.145 | 3.77E-169 | 12 GPC4       |
| 1.00E-39  | 1.619913851 | 0.542 | 0.38  | 3.21E-35  | 12 PTPN1      |
| 0         | 1.601760738 | 0.537 | 0.089 | 0         | 12 PAG1       |
| 0         | 1.600014538 | 0.505 | 0.08  | 0         | 12 EDIL3      |
| 0         | 1.599761622 | 0.491 | 0.075 | 0         | 12 NTM        |
| 9.70E-60  | 1.598397936 | 0.43  | 0.206 | 3.12E-55  | 12 NAMPT      |
| 1.25E-206 | 1.596577742 | 0.597 | 0.173 | 4.00E-202 | 12 ROBO1      |
| 6.79E-146 | 1.586168973 | 0.584 | 0.213 | 2.18E-141 | 12 TMEM178B   |
| 6.10E-77  | 1.580399957 | 0.757 | 0.562 | 1.96E-72  | 12 VMP1       |
| 8.88E-83  | 1.576108562 | 0.419 | 0.162 | 2.85E-78  | 12 FAM155A    |
| 0         | 1.570830573 | 0.563 | 0.041 | 0         | 12 WT1        |
| 1.72E-124 | 1.567411443 | 0.692 | 0.361 | 5.54E-120 | 12 MYRIP      |
| 3.78E-197 | 1.563168041 | 0.878 | 0.5   | 1.22E-192 | 12 AUTS2      |
| 9.59E-174 | 1.548512571 | 0.682 | 0.248 | 3.08E-169 | 12 TNIK       |
| 1.41E-283 | 1.541031972 | 0.721 | 0.199 | 4.53E-279 | 12 CD200      |
| 0         | 1.527184343 | 0.488 | 0.035 | 0         | 12 HRH1       |
| 0         | 1.517991225 | 0.501 | 0.084 | 0         | 12 XYLT1      |
| 1.26E-160 | 1.512824022 | 0.876 | 0.545 | 4.05E-156 | 12 ARHGAP29   |
| 0         | 1.504231482 | 0.416 | 0.035 | 0         | 12 GPR176     |
| 4.39E-166 | 1.50165834  | 0.78  | 0.369 | 1.41E-161 | 12 FRY        |
| 1.24E-159 | 1.492688163 | 0.676 | 0.257 | 3.98E-155 | 12 PRUNE2     |
| 0         | 1.489534539 | 0.456 | 0.069 | 0         | 12 LAMA3      |
| 0         | 1.486260553 | 0.555 | 0.05  | 0         | 12 LINC01197  |
| 1.36E-48  | 1.483947387 | 0.632 | 0.406 | 4.36E-44  | 12 ERRFI1     |
| 1.54E-32  | 1.443891631 | 0.367 | 0.208 | 4.94E-28  | 12 ACSM3      |
| 1.51E-207 | 1.440771147 | 0.481 | 0.112 | 4.84E-203 | 12 APBA1      |
| 1.29E-149 | 1.438064801 | 0.859 | 0.522 | 4.15E-145 | 12 MAML3      |

|           |             |       |       |           |               |
|-----------|-------------|-------|-------|-----------|---------------|
| 4.31E-84  | 1.43774321  | 0.353 | 0.12  | 1.38E-79  | 12 NAV3       |
| 6.82E-110 | 1.43481536  | 0.78  | 0.49  | 2.19E-105 | 12 PAWR       |
| 0         | 1.433797476 | 0.702 | 0.147 | 0         | 12 PLCE1      |
| 0         | 1.420146175 | 0.459 | 0.028 | 0         | 12 NID2       |
| 6.33E-101 | 1.419933331 | 0.452 | 0.16  | 2.03E-96  | 12 CREB5      |
| 1.92E-75  | 1.418704018 | 0.518 | 0.249 | 6.16E-71  | 12 ELOVL5     |
| 5.33E-123 | 1.414179271 | 0.77  | 0.443 | 1.71E-118 | 12 PALLD      |
| 4.79E-245 | 1.401003884 | 0.787 | 0.261 | 1.54E-240 | 12 AC098650.1 |
| 3.53E-117 | 1.395197145 | 0.529 | 0.2   | 1.13E-112 | 12 DLGAP1     |
| 2.66E-134 | 1.389443693 | 0.682 | 0.289 | 8.53E-130 | 12 RAPGEF3    |
| 4.13E-31  | 1.375076604 | 0.722 | 0.645 | 1.33E-26  | 12 SIK2       |
| 2.33E-281 | 1.34917154  | 0.554 | 0.107 | 7.48E-277 | 12 ALPK2      |
| 0         | 1.347665737 | 0.394 | 0.03  | 0         | 12 DPYSL3     |
| 6.34E-88  | 1.340596984 | 0.463 | 0.189 | 2.04E-83  | 12 SDC2       |
| 2.34E-144 | 1.339074106 | 0.656 | 0.282 | 7.51E-140 | 12 CASC15     |
| 9.39E-256 | 1.321652061 | 0.368 | 0.053 | 3.02E-251 | 12 CAVIN2-AS1 |
| 7.56E-132 | 1.314968559 | 0.514 | 0.17  | 2.43E-127 | 12 FOS        |
| 3.03E-108 | 1.310826485 | 0.862 | 0.627 | 9.74E-104 | 12 THRB       |
| 2.03E-65  | 1.304770522 | 0.666 | 0.466 | 6.51E-61  | 12 UTY        |
| 1.08E-139 | 1.296018725 | 0.495 | 0.155 | 3.47E-135 | 12 SGCD       |
| 1.42E-163 | 1.289255133 | 0.537 | 0.164 | 4.57E-159 | 12 DTNA       |
| 1.19E-78  | 1.28364205  | 0.701 | 0.461 | 3.82E-74  | 12 RBBP8      |
| 4.78E-162 | 1.282946944 | 0.894 | 0.599 | 1.54E-157 | 12 CCDC198    |
| 2.81E-154 | 1.275706901 | 0.645 | 0.242 | 9.01E-150 | 12 KIF26B     |
| 8.11E-75  | 1.275323158 | 0.482 | 0.224 | 2.61E-70  | 12 PLOD2      |
| 0         | 1.266323881 | 0.319 | 0.029 | 0         | 12 F5         |
| 2.49E-175 | 1.264318967 | 0.652 | 0.229 | 7.99E-171 | 12 EVA1C      |
| 1.08E-181 | 1.263397299 | 0.617 | 0.191 | 3.46E-177 | 12 UNC5C      |
| 3.74E-82  | 1.261743115 | 0.709 | 0.434 | 1.20E-77  | 12 SASH1      |
| 1.17E-91  | 1.256912697 | 0.862 | 0.66  | 3.74E-87  | 12 PAX8-AS1   |
| 0         | 1.256025313 | 0.367 | 0.015 | 0         | 12 KLRG2      |
| 4.31E-65  | 1.254703188 | 0.282 | 0.094 | 1.38E-60  | 12 THBS1      |
| 1.12E-106 | 1.252381002 | 0.496 | 0.186 | 3.60E-102 | 12 ZFP36      |
| 5.87E-128 | 1.237491553 | 0.701 | 0.336 | 1.89E-123 | 12 ITGA1      |
| 7.06E-100 | 1.237215954 | 0.77  | 0.441 | 2.27E-95  | 12 GALNT14    |
| 1.65E-163 | 1.223672454 | 0.74  | 0.28  | 5.31E-159 | 12 UGT2B7     |
| 4.81E-105 | 1.218289684 | 0.482 | 0.181 | 1.55E-100 | 12 SLC39A14   |
| 0         | 1.21659125  | 0.403 | 0.022 | 0         | 12 ZNF536     |
| 4.28E-106 | 1.215078623 | 0.758 | 0.478 | 1.37E-101 | 12 RAI14      |
| 4.85E-72  | 1.211440769 | 0.799 | 0.556 | 1.56E-67  | 12 P3H2       |
| 8.05E-146 | 1.199244962 | 0.587 | 0.213 | 2.59E-141 | 12 TLE4       |
| 1.06E-257 | 1.198236495 | 0.529 | 0.103 | 3.40E-253 | 12 RHEX       |
| 1.05E-182 | 1.191848852 | 0.876 | 0.367 | 3.39E-178 | 12 BNC2       |
| 1.08E-179 | 1.181596372 | 0.614 | 0.204 | 3.46E-175 | 12 BCAM       |
| 2.72E-273 | 1.177895025 | 0.597 | 0.131 | 8.75E-269 | 12 DNMI       |
| 7.98E-168 | 1.166359894 | 0.495 | 0.133 | 2.56E-163 | 12 PROM1      |
| 9.33E-140 | 1.161613451 | 0.529 | 0.166 | 3.00E-135 | 12 CDH2       |
| 1.69E-88  | 1.160851743 | 0.511 | 0.216 | 5.41E-84  | 12 NFKBIZ     |
| 8.43E-263 | 1.158748959 | 0.394 | 0.06  | 2.71E-258 | 12 MICAL2     |
| 1.39E-87  | 1.15547351  | 0.63  | 0.359 | 4.46E-83  | 12 RIC8B      |
| 9.85E-189 | 1.143109244 | 0.553 | 0.15  | 3.16E-184 | 12 KIRREL1    |

|           |             |       |       |           |               |
|-----------|-------------|-------|-------|-----------|---------------|
| 3.78E-196 | 1.138096125 | 0.537 | 0.142 | 1.21E-191 | 12 MCTP2      |
| 8.96E-103 | 1.137156138 | 0.34  | 0.099 | 2.88E-98  | 12 SLC44A5    |
| 0         | 1.13570748  | 0.518 | 0.079 | 0         | 12 CLIC5      |
| 1.22E-135 | 1.134853843 | 0.689 | 0.305 | 3.91E-131 | 12 MYOF       |
| 6.09E-292 | 1.133889827 | 0.354 | 0.043 | 1.96E-287 | 12 IGFBP2     |
| 3.36E-73  | 1.133770641 | 0.652 | 0.367 | 1.08E-68  | 12 SAMD4A     |
| 0         | 1.132659164 | 0.412 | 0.034 | 0         | 12 BMP7       |
| 2.26E-50  | 1.130075571 | 0.321 | 0.133 | 7.27E-46  | 12 LINC01697  |
| 5.40E-64  | 1.127746349 | 0.728 | 0.527 | 1.73E-59  | 12 HIVEP2     |
| 1.41E-50  | 1.127083272 | 0.642 | 0.414 | 4.54E-46  | 12 LINC01320  |
| 0         | 1.125357031 | 0.327 | 0.019 | 0         | 12 VCAN       |
| 8.10E-289 | 1.124859914 | 0.347 | 0.042 | 2.60E-284 | 12 HSPB8      |
| 2.20E-98  | 1.123560353 | 0.442 | 0.165 | 7.06E-94  | 12 TSPAN12    |
| 1.66E-136 | 1.12355488  | 0.619 | 0.267 | 5.32E-132 | 12 PON2       |
| 6.44E-46  | 1.12215818  | 0.328 | 0.144 | 2.07E-41  | 12 CLSTN2     |
| 4.65E-138 | 1.116886629 | 0.489 | 0.147 | 1.49E-133 | 12 EGR1       |
| 3.92E-68  | 1.113577779 | 0.81  | 0.598 | 1.26E-63  | 12 IGFBP7     |
| 2.24E-124 | 1.112112406 | 0.596 | 0.223 | 7.20E-120 | 12 CLIC4      |
| 3.46E-88  | 1.110225889 | 0.532 | 0.236 | 1.11E-83  | 12 NPR3       |
| 9.16E-273 | 1.104169387 | 0.494 | 0.087 | 2.94E-268 | 12 MSRB3      |
| 1.67E-74  | 1.0953825   | 0.574 | 0.31  | 5.37E-70  | 12 ZFP36L1    |
| 0         | 1.093447884 | 0.322 | 0.011 | 0         | 12 BTLA       |
| 6.64E-102 | 1.09052466  | 0.616 | 0.291 | 2.13E-97  | 12 PLEKHH2    |
| 6.77E-152 | 1.090112028 | 0.662 | 0.249 | 2.17E-147 | 12 NPAS3      |
| 7.39E-117 | 1.086409274 | 0.757 | 0.39  | 2.37E-112 | 12 STOX2      |
| 6.02E-94  | 1.081162203 | 0.816 | 0.54  | 1.93E-89  | 12 BCL2       |
| 1.14E-23  | 1.079907073 | 0.321 | 0.191 | 3.66E-19  | 12 ZNF331     |
| 3.52E-16  | 1.076029526 | 0.476 | 0.376 | 1.13E-11  | 12 SOD2       |
| 0         | 1.07345303  | 0.269 | 0.008 | 0         | 12 LINC00924  |
| 1.80E-127 | 1.072346641 | 0.332 | 0.078 | 5.79E-123 | 12 IGFBP4     |
| 9.84E-102 | 1.069198137 | 0.653 | 0.349 | 3.16E-97  | 12 PRKCI      |
| 1.23E-183 | 1.066861188 | 0.325 | 0.056 | 3.94E-179 | 12 ABCG1      |
| 3.24E-74  | 1.066808057 | 0.344 | 0.126 | 1.04E-69  | 12 LONRF2     |
| 1.48E-22  | 1.062493781 | 0.311 | 0.185 | 4.74E-18  | 12 HMGCS1     |
| 1.68E-116 | 1.062369903 | 0.344 | 0.087 | 5.39E-112 | 12 CDH6       |
| 2.63E-18  | 1.062013336 | 0.473 | 0.385 | 8.46E-14  | 12 DPP6       |
| 1.25E-156 | 1.060388947 | 0.347 | 0.074 | 4.00E-152 | 12 POU6F2     |
| 3.18E-156 | 1.060273338 | 0.368 | 0.083 | 1.02E-151 | 12 CFAP54     |
| 8.45E-70  | 1.057593002 | 0.295 | 0.098 | 2.71E-65  | 12 GLUL       |
| 1.03E-274 | 1.054214164 | 0.499 | 0.092 | 3.30E-270 | 12 AC092894.1 |
| 4.68E-88  | 1.050895975 | 0.594 | 0.294 | 1.50E-83  | 12 FOSL2      |
| 3.38E-45  | 1.050373777 | 0.419 | 0.218 | 1.09E-40  | 12 NR4A1      |
| 5.70E-145 | 1.050082713 | 0.96  | 0.809 | 1.83E-140 | 12 PARD3B     |
| 6.61E-61  | 1.045283953 | 0.777 | 0.568 | 2.12E-56  | 12 CNKSR3     |
| 3.58E-105 | 1.044246901 | 0.386 | 0.116 | 1.15E-100 | 12 TNFAIP8    |
| 1.89E-94  | 1.043587485 | 0.868 | 0.638 | 6.06E-90  | 12 EPB41L5    |
| 7.85E-94  | 1.032595855 | 0.741 | 0.423 | 2.52E-89  | 12 COL4A2     |
| 4.87E-286 | 1.02991387  | 0.351 | 0.043 | 1.56E-281 | 12 PHACTR3    |
| 6.57E-92  | 1.028391068 | 0.643 | 0.317 | 2.11E-87  | 12 COL4A1     |
| 1.75E-78  | 1.026944474 | 0.265 | 0.076 | 5.63E-74  | 12 AC020916.1 |
| 1.04E-157 | 1.025162219 | 0.319 | 0.062 | 3.35E-153 | 12 COL26A1    |

|           |             |       |       |           |               |
|-----------|-------------|-------|-------|-----------|---------------|
| 4.64E-69  | 1.021924628 | 0.422 | 0.182 | 1.49E-64  | 12 MB21D2     |
| 3.32E-102 | 1.02051944  | 0.511 | 0.194 | 1.07E-97  | 12 FIGN       |
| 7.36E-233 | 1.020158952 | 0.409 | 0.072 | 2.36E-228 | 12 ILDR2      |
| 8.39E-111 | 1.017732677 | 0.777 | 0.41  | 2.70E-106 | 12 COL4A5     |
| 1.50E-89  | 1.016076253 | 0.272 | 0.071 | 4.83E-85  | 12 XKR4       |
| 4.65E-115 | 1.012266935 | 0.351 | 0.096 | 1.49E-110 | 12 MLF1       |
| 5.65E-124 | 1.008573124 | 0.524 | 0.179 | 1.81E-119 | 12 ABI3BP     |
| 3.41E-82  | 1.006238435 | 0.636 | 0.361 | 1.10E-77  | 12 FNBP1      |
| 1.11E-84  | 1.005541957 | 0.649 | 0.313 | 3.58E-80  | 12 NRP1       |
| 1.03E-97  | 1.00493682  | 0.686 | 0.363 | 3.30E-93  | 12 ARNT2      |
| 0         | 1.000735259 | 0.34  | 0.037 | 0         | 12 OCA2       |
| 7.61E-144 | 0.999995629 | 0.504 | 0.154 | 2.44E-139 | 12 RFTN1      |
| 1.19E-124 | 0.992063039 | 0.475 | 0.154 | 3.81E-120 | 12 IL15       |
| 1.39E-202 | 0.990968724 | 0.452 | 0.094 | 4.48E-198 | 12 DOCK11     |
| 1.34E-81  | 0.98424277  | 0.801 | 0.562 | 4.30E-77  | 12 LARGE1     |
| 2.79E-115 | 0.982006071 | 0.896 | 0.702 | 8.97E-111 | 12 AFDN       |
| 9.02E-92  | 0.978114146 | 0.426 | 0.15  | 2.90E-87  | 12 HDAC9      |
| 2.77E-97  | 0.968806236 | 0.607 | 0.288 | 8.89E-93  | 12 TUSC3      |
| 6.66E-21  | 0.96730997  | 0.394 | 0.258 | 2.14E-16  | 12 NCEH1      |
| 1.48E-40  | 0.958507694 | 0.652 | 0.501 | 4.77E-36  | 12 RFX3       |
| 4.47E-130 | 0.950350435 | 0.309 | 0.067 | 1.44E-125 | 12 TNFRSF11B  |
| 3.44E-125 | 0.94849924  | 0.511 | 0.178 | 1.10E-120 | 12 NEDD9      |
| 2.51E-212 | 0.94844074  | 0.322 | 0.048 | 8.08E-208 | 12 FHL1       |
| 1.91E-23  | 0.946962225 | 0.387 | 0.239 | 6.14E-19  | 12 ARHGAP42   |
| 2.42E-33  | 0.9463738   | 0.623 | 0.468 | 7.79E-29  | 12 CDC42SE2   |
| 3.23E-183 | 0.944807216 | 0.482 | 0.114 | 1.04E-178 | 12 RBMS3      |
| 2.00E-216 | 0.944180167 | 0.423 | 0.079 | 6.43E-212 | 12 PVT1       |
| 2.58E-104 | 0.938975071 | 0.501 | 0.19  | 8.29E-100 | 12 ITGA3      |
| 8.37E-65  | 0.936983471 | 0.623 | 0.375 | 2.69E-60  | 12 ZNF608     |
| 3.35E-143 | 0.936872181 | 0.453 | 0.121 | 1.08E-138 | 12 COL8A1     |
| 2.77E-49  | 0.936459452 | 0.633 | 0.413 | 8.89E-45  | 12 BACH2      |
| 6.42E-95  | 0.936228295 | 0.348 | 0.106 | 2.06E-90  | 12 ADAMTS3    |
| 3.30E-83  | 0.935674006 | 0.698 | 0.396 | 1.06E-78  | 12 MAP3K5     |
| 5.49E-112 | 0.93293368  | 0.399 | 0.122 | 1.76E-107 | 12 BCL6       |
| 6.27E-94  | 0.932626666 | 0.647 | 0.323 | 2.01E-89  | 12 MET        |
| 3.25E-241 | 0.928881215 | 0.306 | 0.038 | 1.04E-236 | 12 FHL2       |
| 0         | 0.925622597 | 0.278 | 0.004 | 0         | 12 AC020912.1 |
| 6.57E-199 | 0.918807325 | 0.331 | 0.053 | 2.11E-194 | 12 VIM        |
| 4.99E-62  | 0.91864064  | 0.74  | 0.519 | 1.60E-57  | 12 EFCAB13    |
| 3.32E-44  | 0.916140964 | 0.433 | 0.233 | 1.07E-39  | 12 RGS12      |
| 2.58E-71  | 0.912075429 | 0.633 | 0.373 | 8.28E-67  | 12 ATP13A3    |
| 0         | 0.911056994 | 0.26  | 0.016 | 0         | 12 EDIL3-DT   |
| 1.44E-82  | 0.910694978 | 0.806 | 0.51  | 4.63E-78  | 12 NFIA       |
| 5.17E-44  | 0.909653088 | 0.643 | 0.461 | 1.66E-39  | 12 CHD1       |
| 0         | 0.909011505 | 0.35  | 0.028 | 0         | 12 NPR1       |
| 3.10E-85  | 0.908863245 | 0.691 | 0.367 | 9.95E-81  | 12 ARHGAP26   |
| 5.70E-99  | 0.905844328 | 0.576 | 0.257 | 1.83E-94  | 12 HYDIN      |
| 6.20E-68  | 0.9040532   | 0.413 | 0.172 | 1.99E-63  | 12 AHR        |
| 2.72E-92  | 0.903490734 | 0.679 | 0.348 | 8.74E-88  | 12 SRGAP1     |
| 3.99E-149 | 0.90132032  | 0.334 | 0.07  | 1.28E-144 | 12 CYP1B1-AS1 |
| 3.89E-74  | 0.90040944  | 0.591 | 0.331 | 1.25E-69  | 12 MTMR12     |



|           |             |       |       |           |                |
|-----------|-------------|-------|-------|-----------|----------------|
| 8.54E-37  | 0.897774421 | 0.279 | 0.123 | 2.74E-32  | 12 H2AC6       |
| 4.17E-82  | 0.89107892  | 0.75  | 0.482 | 1.34E-77  | 12 MICAL3      |
| 1.62E-119 | 0.886994541 | 0.947 | 0.836 | 5.20E-115 | 12 PARD3       |
| 6.63E-16  | 0.886711298 | 0.512 | 0.4   | 2.13E-11  | 12 ELL2        |
| 5.46E-33  | 0.880424728 | 0.629 | 0.484 | 1.75E-28  | 12 ESYT2       |
| 8.84E-76  | 0.876836982 | 0.908 | 0.679 | 2.84E-71  | 12 KAZN        |
| 0         | 0.875968789 | 0.305 | 0.029 | 0         | 12 TNNT2       |
| 3.59E-60  | 0.8729493   | 0.527 | 0.268 | 1.15E-55  | 12 NRG1        |
| 3.01E-84  | 0.870686058 | 0.406 | 0.146 | 9.66E-80  | 12 JUN         |
| 4.24E-93  | 0.870417453 | 0.325 | 0.095 | 1.36E-88  | 12 SULT1C4     |
| 0         | 0.870259848 | 0.327 | 0.004 | 0         | 12 AL353740.1  |
| 6.57E-87  | 0.8669839   | 0.911 | 0.779 | 2.11E-82  | 12 MYO9A       |
| 1.64E-62  | 0.863728537 | 0.567 | 0.313 | 5.25E-58  | 12 GTDC1       |
| 6.13E-79  | 0.855192806 | 0.269 | 0.074 | 1.97E-74  | 12 AC113386.1  |
| 1.66E-54  | 0.854211823 | 0.728 | 0.514 | 5.32E-50  | 12 ADAM10      |
| 5.55E-104 | 0.852638014 | 0.466 | 0.157 | 1.78E-99  | 12 ZEB2        |
| 3.58E-65  | 0.851279851 | 0.429 | 0.197 | 1.15E-60  | 12 IFT57       |
| 1.02E-148 | 0.851147062 | 0.376 | 0.086 | 3.28E-144 | 12 CHN1        |
| 8.92E-77  | 0.851127487 | 0.786 | 0.533 | 2.87E-72  | 12 PPFIBP1     |
| 1.23E-113 | 0.848990789 | 0.285 | 0.064 | 3.94E-109 | 12 SNTG2       |
| 1.38E-78  | 0.847979416 | 0.558 | 0.276 | 4.43E-74  | 12 CLIP4       |
| 7.54E-85  | 0.846619135 | 0.311 | 0.092 | 2.42E-80  | 12 PDGFD       |
| 2.24E-31  | 0.846376857 | 0.353 | 0.193 | 7.21E-27  | 12 TSC22D3     |
| 6.29E-189 | 0.843892712 | 0.309 | 0.049 | 2.02E-184 | 12 NHSL2       |
| 9.10E-46  | 0.842838816 | 0.387 | 0.188 | 2.92E-41  | 12 PRELID2     |
| 8.62E-38  | 0.842286794 | 0.701 | 0.509 | 2.77E-33  | 12 SDK1        |
| 5.70E-144 | 0.841805762 | 0.329 | 0.069 | 1.83E-139 | 12 ZBTB7C      |
| 3.85E-77  | 0.837845218 | 0.977 | 0.827 | 1.24E-72  | 12 BICC1       |
| 5.75E-65  | 0.832855044 | 0.278 | 0.09  | 1.85E-60  | 12 ENPP1       |
| 1.24E-67  | 0.830693624 | 0.501 | 0.238 | 3.99E-63  | 12 JAZF1       |
| 2.61E-87  | 0.83033039  | 0.337 | 0.104 | 8.39E-83  | 12 GRM8        |
| 3.53E-65  | 0.826947535 | 0.476 | 0.234 | 1.13E-60  | 12 HNRNPLL     |
| 3.03E-105 | 0.825793784 | 0.889 | 0.597 | 9.72E-101 | 12 UTRN        |
| 2.39E-72  | 0.824952315 | 0.812 | 0.61  | 7.68E-68  | 12 FER         |
| 5.49E-177 | 0.824212181 | 0.306 | 0.052 | 1.76E-172 | 12 IL1RAP      |
| 5.20E-44  | 0.823768386 | 0.57  | 0.345 | 1.67E-39  | 12 RETREG1     |
| 5.11E-152 | 0.822077964 | 0.424 | 0.106 | 1.64E-147 | 12 SLC16A1-AS1 |
| 5.00E-148 | 0.821836517 | 0.348 | 0.074 | 1.61E-143 | 12 NECAB1      |
| 1.30E-82  | 0.819831708 | 0.863 | 0.639 | 4.16E-78  | 12 TTC28       |
| 5.26E-64  | 0.818091844 | 0.6   | 0.338 | 1.69E-59  | 12 ARAP2       |
| 1.15E-61  | 0.81672363  | 0.83  | 0.673 | 3.70E-57  | 12 EXT1        |
| 4.86E-60  | 0.814885214 | 0.66  | 0.397 | 1.56E-55  | 12 GULP1       |
| 2.44E-65  | 0.811691778 | 0.837 | 0.584 | 7.84E-61  | 12 PDE7B       |
| 4.04E-68  | 0.806191345 | 0.548 | 0.276 | 1.30E-63  | 12 PCDHGA1     |
| 8.87E-46  | 0.803493558 | 0.378 | 0.179 | 2.85E-41  | 12 MAOB        |
| 1.34E-52  | 0.802223948 | 0.79  | 0.585 | 4.31E-48  | 12 PTPRJ       |
| 1.49E-46  | 0.800317508 | 0.471 | 0.25  | 4.80E-42  | 12 EYA2        |
| 2.82E-48  | 0.7975741   | 0.728 | 0.545 | 9.05E-44  | 12 ROCK2       |
| 3.78E-66  | 0.797084046 | 0.568 | 0.292 | 1.21E-61  | 12 PLCB4       |
| 1.16E-72  | 0.796217218 | 0.518 | 0.247 | 3.73E-68  | 12 ZNF846      |
| 8.17E-54  | 0.795528224 | 0.422 | 0.207 | 2.62E-49  | 12 CDS1        |

|           |             |       |       |           |               |
|-----------|-------------|-------|-------|-----------|---------------|
| 1.96E-62  | 0.795474182 | 0.95  | 0.88  | 6.28E-58  | 12 WWOX       |
| 2.27E-103 | 0.791041279 | 0.383 | 0.117 | 7.29E-99  | 12 ACTN1      |
| 2.42E-71  | 0.789854357 | 0.699 | 0.423 | 7.78E-67  | 12 CEP112     |
| 9.90E-58  | 0.789287372 | 0.704 | 0.426 | 3.18E-53  | 12 CPM        |
| 4.43E-76  | 0.788862938 | 0.46  | 0.201 | 1.42E-71  | 12 ARL13B     |
| 6.92E-47  | 0.786001579 | 0.609 | 0.389 | 2.22E-42  | 12 DIAPH2     |
| 1.90E-52  | 0.785370244 | 0.344 | 0.145 | 6.12E-48  | 12 TPRG1      |
| 3.07E-38  | 0.779191318 | 0.482 | 0.291 | 9.86E-34  | 12 YPEL2      |
| 6.18E-55  | 0.778976728 | 0.571 | 0.34  | 1.98E-50  | 12 SEMA4D     |
| 1.34E-37  | 0.778757008 | 0.64  | 0.481 | 4.30E-33  | 12 CAST       |
| 1.09E-20  | 0.778240787 | 0.623 | 0.491 | 3.50E-16  | 12 HIF1A      |
| 7.87E-62  | 0.777924379 | 0.702 | 0.472 | 2.53E-57  | 12 RAP1B      |
| 1.00E-60  | 0.777923505 | 0.505 | 0.263 | 3.23E-56  | 12 LONRF1     |
| 4.46E-217 | 0.770934165 | 0.325 | 0.048 | 1.43E-212 | 12 GUCY1B1    |
| 1.34E-30  | 0.766068983 | 0.4   | 0.234 | 4.30E-26  | 12 UBC        |
| 2.10E-52  | 0.763468531 | 0.629 | 0.421 | 6.76E-48  | 12 VPS41      |
| 2.17E-54  | 0.76273113  | 0.565 | 0.331 | 6.98E-50  | 12 DUSP16     |
| 1.08E-43  | 0.759087716 | 0.399 | 0.202 | 3.46E-39  | 12 TPK1       |
| 3.50E-50  | 0.757487716 | 0.419 | 0.211 | 1.12E-45  | 12 DPY19L3    |
| 1.29E-124 | 0.75721258  | 0.285 | 0.059 | 4.14E-120 | 12 ABCC3      |
| 2.44E-93  | 0.756963128 | 0.403 | 0.133 | 7.84E-89  | 12 CAMK1D     |
| 1.16E-53  | 0.754025116 | 0.797 | 0.616 | 3.72E-49  | 12 TBL1XR1    |
| 7.65E-55  | 0.753197941 | 0.324 | 0.126 | 2.46E-50  | 12 SPSB1      |
| 1.21E-179 | 0.752008718 | 0.289 | 0.045 | 3.89E-175 | 12 PAK3       |
| 3.15E-54  | 0.751494687 | 0.614 | 0.361 | 1.01E-49  | 12 DGKH       |
| 4.74E-65  | 0.746483905 | 0.902 | 0.778 | 1.52E-60  | 12 AOPEP      |
| 9.52E-59  | 0.746020083 | 0.601 | 0.357 | 3.06E-54  | 12 NOTCH2     |
| 9.60E-20  | 0.744394585 | 0.491 | 0.356 | 3.08E-15  | 12 NFKB1      |
| 8.39E-52  | 0.74420325  | 0.445 | 0.213 | 2.70E-47  | 12 ANKRD33B   |
| 3.48E-64  | 0.74292724  | 0.875 | 0.736 | 1.12E-59  | 12 SPIDR      |
| 4.04E-71  | 0.741681632 | 0.471 | 0.208 | 1.30E-66  | 12 AP000295.1 |
| 6.69E-70  | 0.7395437   | 0.463 | 0.208 | 2.15E-65  | 12 HYDIN2     |
| 1.44E-25  | 0.73852147  | 0.285 | 0.153 | 4.62E-21  | 12 ZFP36L2    |
| 1.12E-70  | 0.737462479 | 0.351 | 0.127 | 3.60E-66  | 12 FLVCR2     |
| 8.43E-35  | 0.737067012 | 0.409 | 0.238 | 2.71E-30  | 12 AC090912.1 |
| 3.46E-46  | 0.736503851 | 0.606 | 0.4   | 1.11E-41  | 12 CAMK2D     |
| 2.02E-44  | 0.734612179 | 0.63  | 0.439 | 6.50E-40  | 12 IQGAP1     |
| 1.72E-106 | 0.733612619 | 0.361 | 0.1   | 5.51E-102 | 12 ITIH5      |
| 3.83E-44  | 0.73270924  | 0.529 | 0.317 | 1.23E-39  | 12 CTIF       |
| 2.83E-56  | 0.732105689 | 0.381 | 0.166 | 9.10E-52  | 12 LRR1Q1     |
| 8.02E-47  | 0.731981065 | 0.711 | 0.51  | 2.58E-42  | 12 GMDS       |
| 3.69E-34  | 0.729894644 | 0.639 | 0.464 | 1.19E-29  | 12 FLNB       |
| 2.77E-73  | 0.727468127 | 0.354 | 0.126 | 8.90E-69  | 12 ATRNL1     |
| 3.70E-50  | 0.725159145 | 0.668 | 0.43  | 1.19E-45  | 12 EGFR       |
| 7.51E-66  | 0.721855774 | 0.732 | 0.469 | 2.41E-61  | 12 FCHSD2     |
| 7.04E-17  | 0.720367608 | 0.279 | 0.173 | 2.26E-12  | 12 TP53BP2    |
| 1.98E-50  | 0.719996193 | 0.671 | 0.471 | 6.36E-46  | 12 SLC35F5    |
| 5.78E-37  | 0.717937244 | 0.658 | 0.482 | 1.86E-32  | 12 TACC2      |
| 0         | 0.71748711  | 0.263 | 0.019 | 0         | 12 AC022905.1 |
| 5.51E-163 | 0.713948323 | 0.299 | 0.05  | 1.77E-158 | 12 NPHS1      |
| 7.77E-98  | 0.713088465 | 0.294 | 0.072 | 2.50E-93  | 12 ATP10A     |

|           |             |       |       |           |                |
|-----------|-------------|-------|-------|-----------|----------------|
| 2.40E-22  | 0.712298096 | 0.344 | 0.205 | 7.71E-18  | 12 ROR1        |
| 5.17E-136 | 0.710705529 | 0.407 | 0.105 | 1.66E-131 | 12 AFF3        |
| 1.65E-92  | 0.708655565 | 0.332 | 0.098 | 5.29E-88  | 12 RHOB        |
| 1.25E-26  | 0.707759434 | 0.331 | 0.187 | 4.01E-22  | 12 STAT1       |
| 3.15E-81  | 0.706339945 | 0.403 | 0.149 | 1.01E-76  | 12 LIMK2       |
| 6.39E-53  | 0.705997516 | 0.492 | 0.257 | 2.05E-48  | 12 DCBLD2      |
| 3.04E-31  | 0.704980719 | 0.396 | 0.219 | 9.75E-27  | 12 FGF14       |
| 4.87E-133 | 0.699745745 | 0.309 | 0.065 | 1.56E-128 | 12 IFITM3      |
| 6.07E-50  | 0.697934126 | 0.632 | 0.373 | 1.95E-45  | 12 FRMD4B      |
| 1.12E-55  | 0.696414044 | 0.724 | 0.464 | 3.59E-51  | 12 SSBP2       |
| 1.15E-51  | 0.695701706 | 0.738 | 0.531 | 3.70E-47  | 12 DPYD        |
| 1.92E-82  | 0.692338434 | 0.338 | 0.108 | 6.17E-78  | 12 AFAP1       |
| 1.28E-26  | 0.686877183 | 0.432 | 0.28  | 4.12E-22  | 12 SORT1       |
| 7.63E-112 | 0.686875375 | 0.439 | 0.134 | 2.45E-107 | 12 EPB41L2     |
| 1.68E-52  | 0.686301663 | 0.816 | 0.598 | 5.38E-48  | 12 AC012409.2  |
| 4.15E-59  | 0.68550057  | 0.763 | 0.518 | 1.33E-54  | 12 PAX8        |
| 1.61E-30  | 0.684776671 | 0.593 | 0.409 | 5.16E-26  | 12 CDK6        |
| 7.28E-39  | 0.684656803 | 0.645 | 0.471 | 2.34E-34  | 12 ETV6        |
| 4.24E-59  | 0.683924829 | 0.849 | 0.683 | 1.36E-54  | 12 TRIO        |
| 6.41E-52  | 0.683924795 | 0.286 | 0.11  | 2.06E-47  | 12 CTSC        |
| 1.16E-87  | 0.683202224 | 0.376 | 0.122 | 3.72E-83  | 12 MEIS1       |
| 3.64E-70  | 0.679538992 | 0.414 | 0.163 | 1.17E-65  | 12 ANXA2       |
| 8.58E-32  | 0.676744805 | 0.653 | 0.48  | 2.75E-27  | 12 FMNL2       |
| 3.78E-42  | 0.674134536 | 0.553 | 0.341 | 1.21E-37  | 12 PER1        |
| 3.29E-72  | 0.673698214 | 0.353 | 0.128 | 1.06E-67  | 12 ACLY        |
| 6.41E-35  | 0.672298298 | 0.63  | 0.457 | 2.06E-30  | 12 LINC00894   |
| 5.30E-70  | 0.671301422 | 0.845 | 0.558 | 1.70E-65  | 12 DST         |
| 7.81E-47  | 0.669590326 | 0.64  | 0.416 | 2.51E-42  | 12 GTF2IRD1    |
| 2.66E-75  | 0.66767017  | 0.376 | 0.133 | 8.53E-71  | 12 NXN         |
| 4.24E-46  | 0.66516414  | 0.774 | 0.6   | 1.36E-41  | 12 CAMTA1      |
| 7.44E-64  | 0.664124217 | 0.689 | 0.386 | 2.39E-59  | 12 ZDHHC14     |
| 9.34E-11  | 0.660906341 | 0.619 | 0.514 | 3.00E-06  | 12 TACC1       |
| 9.79E-40  | 0.660176097 | 0.725 | 0.562 | 3.14E-35  | 12 PAM         |
| 3.94E-61  | 0.660033105 | 0.626 | 0.366 | 1.27E-56  | 12 IQCJ-SCHIP1 |
| 5.73E-44  | 0.659445936 | 0.41  | 0.206 | 1.84E-39  | 12 OSMR        |
| 1.27E-34  | 0.658242186 | 0.462 | 0.272 | 4.09E-30  | 12 PFKP        |
| 9.51E-39  | 0.657696428 | 0.337 | 0.163 | 3.06E-34  | 12 DGKD        |
| 2.04E-42  | 0.657390972 | 0.414 | 0.212 | 6.57E-38  | 12 LAMA5       |
| 3.02E-32  | 0.656439029 | 0.748 | 0.586 | 9.70E-28  | 12 SPTBN1      |
| 2.36E-48  | 0.654524704 | 0.302 | 0.126 | 7.58E-44  | 12 AC107021.1  |
| 3.59E-150 | 0.654361866 | 0.283 | 0.05  | 1.15E-145 | 12 ZNF423      |
| 8.61E-77  | 0.653800679 | 0.253 | 0.067 | 2.77E-72  | 12 APBB1IP     |
| 5.52E-59  | 0.653720489 | 0.332 | 0.126 | 1.77E-54  | 12 SLC9A9      |
| 2.86E-33  | 0.65227906  | 0.653 | 0.493 | 9.19E-29  | 12 HIPK3       |
| 3.56E-55  | 0.652037222 | 0.292 | 0.109 | 1.14E-50  | 12 AC073569.2  |
| 9.19E-71  | 0.651189969 | 0.501 | 0.213 | 2.95E-66  | 12 SLCO3A1     |
| 4.39E-264 | 0.644950831 | 0.276 | 0.027 | 1.41E-259 | 12 WT1-AS      |
| 4.09E-42  | 0.644670816 | 0.517 | 0.313 | 1.31E-37  | 12 RHEB        |
| 5.49E-102 | 0.643767074 | 0.344 | 0.097 | 1.76E-97  | 12 SYNJ2       |
| 2.72E-68  | 0.640637803 | 0.453 | 0.197 | 8.73E-64  | 12 CRMP1       |
| 2.21E-44  | 0.639633936 | 0.64  | 0.446 | 7.08E-40  | 12 CPSF6       |

|           |             |       |       |           |                 |
|-----------|-------------|-------|-------|-----------|-----------------|
| 1.65E-142 | 0.639188089 | 0.283 | 0.053 | 5.29E-138 | 12 SACS         |
| 1.28E-43  | 0.635760571 | 0.422 | 0.218 | 4.11E-39  | 12 AL390879.1   |
| 4.10E-112 | 0.635349862 | 0.252 | 0.051 | 1.32E-107 | 12 PKNOX2       |
| 3.71E-36  | 0.633914573 | 0.646 | 0.451 | 1.19E-31  | 12 DOCK4        |
| 9.12E-30  | 0.633390293 | 0.541 | 0.358 | 2.93E-25  | 12 MOB3B        |
| 6.07E-28  | 0.630330525 | 0.685 | 0.535 | 1.95E-23  | 12 ZHX2         |
| 2.48E-33  | 0.629115308 | 0.291 | 0.137 | 7.97E-29  | 12 HMGA2        |
| 1.07E-78  | 0.62766475  | 0.538 | 0.228 | 3.43E-74  | 12 PAPLN        |
| 3.64E-205 | 0.624318155 | 0.269 | 0.034 | 1.17E-200 | 12 PXDN         |
| 3.60E-42  | 0.62160287  | 0.39  | 0.195 | 1.16E-37  | 12 AC016705.2   |
| 1.44E-45  | 0.620826115 | 0.491 | 0.282 | 4.62E-41  | 12 MYEF2        |
| 1.16E-24  | 0.620539063 | 0.747 | 0.644 | 3.74E-20  | 12 ARIH1        |
| 1.06E-134 | 0.619427219 | 0.256 | 0.046 | 3.42E-130 | 12 MPP3         |
| 9.35E-18  | 0.618899046 | 0.378 | 0.257 | 3.00E-13  | 12 CRY1         |
| 2.10E-96  | 0.618567388 | 0.646 | 0.296 | 6.73E-92  | 12 SRGAP2       |
| 9.48E-53  | 0.61617503  | 0.436 | 0.213 | 3.05E-48  | 12 PLAGL1       |
| 4.17E-45  | 0.615008922 | 0.781 | 0.627 | 1.34E-40  | 12 FTO          |
| 1.56E-33  | 0.614000918 | 0.462 | 0.274 | 5.00E-29  | 12 ANKRD6       |
| 8.38E-42  | 0.613595422 | 0.554 | 0.321 | 2.69E-37  | 12 LDLRAD4      |
| 1.13E-22  | 0.612714573 | 0.439 | 0.293 | 3.64E-18  | 12 GALNT10      |
| 6.39E-46  | 0.612644968 | 0.482 | 0.249 | 2.05E-41  | 12 TGFBR3       |
| 3.52E-29  | 0.612285843 | 0.58  | 0.421 | 1.13E-24  | 12 ATP2B1       |
| 3.06E-23  | 0.610909305 | 0.554 | 0.421 | 9.84E-19  | 12 ITM2B        |
| 4.85E-46  | 0.610104473 | 0.826 | 0.546 | 1.56E-41  | 12 ZBTB16       |
| 3.10E-30  | 0.608553434 | 0.485 | 0.305 | 9.96E-26  | 12 RRAS2        |
| 2.66E-24  | 0.608223017 | 0.548 | 0.408 | 8.55E-20  | 12 GPCPD1       |
| 1.78E-51  | 0.60488539  | 0.942 | 0.874 | 5.72E-47  | 12 LPP          |
| 5.68E-24  | 0.60312452  | 0.872 | 0.804 | 1.83E-19  | 12 AC016831.6   |
| 4.29E-55  | 0.602430402 | 0.355 | 0.143 | 1.38E-50  | 12 EPHA7        |
| 1.27E-44  | 0.600106646 | 0.527 | 0.31  | 4.09E-40  | 12 SLC25A37     |
| 6.66E-32  | 0.599529036 | 0.652 | 0.473 | 2.14E-27  | 12 ITGAV        |
| 1.21E-17  | 0.597984391 | 0.565 | 0.452 | 3.88E-13  | 12 AL358113.1   |
| 1.17E-64  | 0.595688799 | 0.377 | 0.15  | 3.75E-60  | 12 USP31        |
| 5.19E-27  | 0.594189618 | 0.643 | 0.485 | 1.67E-22  | 12 SLC44A3-AS1  |
| 2.58E-51  | 0.592610112 | 0.709 | 0.478 | 8.27E-47  | 12 ARHGEF35-AS1 |
| 1.21E-36  | 0.59160763  | 0.724 | 0.545 | 3.88E-32  | 12 PDLIM5       |
| 1.68E-47  | 0.591309445 | 0.721 | 0.498 | 5.40E-43  | 12 NBPF14       |
| 5.04E-36  | 0.590904667 | 0.768 | 0.602 | 1.62E-31  | 12 TBL1X        |
| 1.29E-54  | 0.588994125 | 0.486 | 0.247 | 4.15E-50  | 12 NBPF15       |
| 4.45E-27  | 0.588953309 | 0.305 | 0.159 | 1.43E-22  | 12 SPOCK1       |
| 4.55E-31  | 0.587963198 | 0.563 | 0.392 | 1.46E-26  | 12 ACTR3        |
| 7.74E-18  | 0.587363312 | 0.468 | 0.34  | 2.49E-13  | 12 PIK3R1       |
| 3.23E-54  | 0.586826939 | 0.344 | 0.142 | 1.04E-49  | 12 SPATA6L      |
| 2.67E-28  | 0.585526969 | 0.488 | 0.318 | 8.58E-24  | 12 FGFR2        |
| 9.34E-46  | 0.584755637 | 0.961 | 0.892 | 3.00E-41  | 12 RORA         |
| 9.12E-37  | 0.583922652 | 0.81  | 0.687 | 2.93E-32  | 12 NUMB         |
| 1.57E-13  | 0.583900153 | 0.268 | 0.17  | 5.06E-09  | 12 SHISA9       |
| 5.73E-23  | 0.581738444 | 0.735 | 0.551 | 1.84E-18  | 12 EFNA5        |
| 0.0005296 | 0.579840774 | 0.407 | 0.365 | 1         | 12 NTN4         |
| 6.07E-31  | 0.579434286 | 0.468 | 0.298 | 1.95E-26  | 12 DYNC2LI1     |
| 7.82E-61  | 0.578987898 | 0.319 | 0.119 | 2.51E-56  | 12 CORO1C       |

|           |             |       |       |           |                 |
|-----------|-------------|-------|-------|-----------|-----------------|
| 4.14E-72  | 0.577999119 | 0.265 | 0.077 | 1.33E-67  | 12 PLA2G4C      |
| 9.19E-76  | 0.57761173  | 0.56  | 0.259 | 2.95E-71  | 12 SRGAP2B      |
| 2.06E-31  | 0.577083569 | 0.725 | 0.604 | 6.62E-27  | 12 ZNF148       |
| 3.68E-28  | 0.575855036 | 0.521 | 0.357 | 1.18E-23  | 12 YBX3         |
| 2.24E-10  | 0.574134338 | 0.288 | 0.199 | 7.20E-06  | 12 GADD45B      |
| 2.92E-38  | 0.574092225 | 0.511 | 0.309 | 9.38E-34  | 12 MOK          |
| 1.59E-139 | 0.573216356 | 0.951 | 0.767 | 5.11E-135 | 12 MAGI2        |
| 1.39E-120 | 0.572988287 | 0.321 | 0.073 | 4.47E-116 | 12 ABLIM2       |
| 1.21E-59  | 0.571702582 | 0.407 | 0.172 | 3.89E-55  | 12 ELMO1        |
| 2.02E-35  | 0.571096981 | 0.551 | 0.36  | 6.49E-31  | 12 SYTL2        |
| 3.72E-18  | 0.571049215 | 0.531 | 0.379 | 1.20E-13  | 12 PCDH9        |
| 4.12E-62  | 0.570821403 | 0.469 | 0.205 | 1.32E-57  | 12 IL6R         |
| 3.97E-24  | 0.570202174 | 0.373 | 0.228 | 1.27E-19  | 12 LNC-LBCS     |
| 1.96E-19  | 0.569126586 | 0.252 | 0.138 | 6.30E-15  | 12 NFKBIA       |
| 1.05E-11  | 0.568784867 | 0.383 | 0.283 | 3.38E-07  | 12 AL359232.1   |
| 4.19E-33  | 0.568626024 | 0.302 | 0.146 | 1.35E-28  | 12 STXPB1       |
| 1.12E-74  | 0.568597805 | 0.327 | 0.109 | 3.61E-70  | 12 CLDN18       |
| 4.84E-27  | 0.567374494 | 0.544 | 0.386 | 1.55E-22  | 12 UBAP2        |
| 1.78E-49  | 0.566675497 | 0.404 | 0.186 | 5.73E-45  | 12 PRKX         |
| 5.56E-45  | 0.56595831  | 0.719 | 0.505 | 1.79E-40  | 12 UACA         |
| 4.58E-32  | 0.565922151 | 0.446 | 0.261 | 1.47E-27  | 12 KLF7         |
| 5.85E-51  | 0.564356889 | 0.256 | 0.092 | 1.88E-46  | 12 TGIF1        |
| 9.37E-42  | 0.564342835 | 0.554 | 0.337 | 3.01E-37  | 12 MAP4K4       |
| 3.66E-33  | 0.562369173 | 0.471 | 0.294 | 1.18E-28  | 12 WRN          |
| 4.64E-34  | 0.561810174 | 0.383 | 0.211 | 1.49E-29  | 12 BLOC1S5-TXND |
| 1.29E-18  | 0.560605842 | 0.344 | 0.218 | 4.15E-14  | 12 EIF2AK3      |
| 2.09E-33  | 0.559968784 | 0.286 | 0.136 | 6.70E-29  | 12 TUB          |
| 6.41E-36  | 0.559799765 | 0.403 | 0.215 | 2.06E-31  | 12 NLGN4Y       |
| 1.11E-33  | 0.559766663 | 0.496 | 0.3   | 3.56E-29  | 12 ZNF462       |
| 1.37E-39  | 0.55589848  | 0.557 | 0.349 | 4.41E-35  | 12 PDE9A        |
| 7.17E-28  | 0.555272403 | 0.682 | 0.541 | 2.30E-23  | 12 DENND4A      |
| 2.18E-70  | 0.553430287 | 0.571 | 0.278 | 7.01E-66  | 12 SRGAP2C      |
| 8.01E-58  | 0.552789957 | 0.915 | 0.8   | 2.57E-53  | 12 MED13L       |
| 1.09E-186 | 0.549246935 | 0.268 | 0.037 | 3.50E-182 | 12 BMP1         |
| 6.15E-45  | 0.54887808  | 0.636 | 0.405 | 1.98E-40  | 12 NBP26        |
| 3.63E-48  | 0.54838486  | 0.445 | 0.221 | 1.17E-43  | 12 AC019257.8   |
| 1.04E-39  | 0.546295958 | 0.354 | 0.172 | 3.35E-35  | 12 AGRN         |
| 8.80E-23  | 0.546263043 | 0.852 | 0.725 | 2.83E-18  | 12 GLS          |
| 4.22E-20  | 0.543874024 | 0.266 | 0.142 | 1.36E-15  | 12 GBA3         |
| 5.57E-87  | 0.543149645 | 0.271 | 0.071 | 1.79E-82  | 12 AC087477.2   |
| 2.27E-41  | 0.5419359   | 0.603 | 0.39  | 7.28E-37  | 12 AC074386.1   |
| 4.92E-55  | 0.539744762 | 0.35  | 0.138 | 1.58E-50  | 12 NSMF         |
| 1.89E-40  | 0.538920899 | 0.329 | 0.155 | 6.08E-36  | 12 DDX31        |
| 3.55E-47  | 0.538770088 | 0.332 | 0.142 | 1.14E-42  | 12 ADCY5        |
| 6.21E-37  | 0.537429851 | 0.475 | 0.273 | 1.99E-32  | 12 EVC          |
| 4.26E-31  | 0.537130232 | 0.735 | 0.552 | 1.37E-26  | 12 STK33        |
| 1.01E-31  | 0.536233375 | 0.475 | 0.3   | 3.25E-27  | 12 PPP2CB       |
| 1.83E-37  | 0.5350609   | 0.345 | 0.162 | 5.86E-33  | 12 AL136234.1   |
| 1.48E-25  | 0.5350524   | 0.682 | 0.544 | 4.75E-21  | 12 TJP1         |
| 8.58E-14  | 0.533665792 | 0.473 | 0.362 | 2.75E-09  | 12 LMCD1-AS1    |
| 1.55E-18  | 0.533111922 | 0.458 | 0.33  | 4.98E-14  | 12 RUSC2        |

|            |             |       |       |           |               |
|------------|-------------|-------|-------|-----------|---------------|
| 6.78E-27   | 0.532419679 | 0.416 | 0.251 | 2.18E-22  | 12 DCDC1      |
| 2.50E-33   | 0.531232669 | 0.43  | 0.24  | 8.03E-29  | 12 CABLES1    |
| 1.89E-27   | 0.529233551 | 0.601 | 0.411 | 6.06E-23  | 12 SPATS2L    |
| 2.09E-28   | 0.527588216 | 0.387 | 0.213 | 6.71E-24  | 12 TENM4      |
| 1.91E-31   | 0.526342195 | 0.82  | 0.661 | 6.14E-27  | 12 PTPN13     |
| 1.11E-36   | 0.524488615 | 0.432 | 0.241 | 3.57E-32  | 12 CEP170     |
| 5.60E-38   | 0.521442558 | 0.718 | 0.507 | 1.80E-33  | 12 ANKRD36C   |
| 1.53E-55   | 0.521200752 | 0.271 | 0.093 | 4.91E-51  | 12 LINC00475  |
| 6.93E-24   | 0.519975629 | 0.288 | 0.149 | 2.23E-19  | 12 ETS1       |
| 1.64E-40   | 0.518561604 | 0.668 | 0.439 | 5.26E-36  | 12 AC105233.4 |
| 6.18E-88   | 0.518459059 | 0.275 | 0.07  | 1.99E-83  | 12 IL4R       |
| 1.14E-25   | 0.517721376 | 0.501 | 0.322 | 3.66E-21  | 12 LINC00278  |
| 1.73E-33   | 0.517642341 | 0.42  | 0.233 | 5.56E-29  | 12 ANKS1B     |
| 6.55E-43   | 0.517270429 | 0.833 | 0.631 | 2.10E-38  | 12 AKT3       |
| 4.34E-40   | 0.516407694 | 0.732 | 0.518 | 1.39E-35  | 12 ANKRD36    |
| 2.74E-16   | 0.515161997 | 0.494 | 0.385 | 8.79E-12  | 12 TMEM165    |
| 1.98E-45   | 0.514773883 | 0.373 | 0.175 | 6.35E-41  | 12 PLEKHG3    |
| 1.12E-27   | 0.513940643 | 0.773 | 0.63  | 3.60E-23  | 12 ARHGEF28   |
| 3.70E-36   | 0.512721036 | 0.62  | 0.432 | 1.19E-31  | 12 LRCH3      |
| 4.41E-36   | 0.512630195 | 0.314 | 0.146 | 1.42E-31  | 12 RYR3       |
| 6.50E-75   | 0.512582055 | 0.285 | 0.082 | 2.09E-70  | 12 SULF1      |
| 5.86E-21   | 0.512496222 | 0.271 | 0.151 | 1.88E-16  | 12 ANOS2P     |
| 2.97E-20   | 0.512323754 | 0.502 | 0.369 | 9.53E-16  | 12 TANK       |
| 2.24E-55   | 0.511355385 | 0.318 | 0.124 | 7.19E-51  | 12 STX2       |
| 8.87E-21   | 0.510250588 | 0.504 | 0.363 | 2.85E-16  | 12 MDM2       |
| 7.77E-112  | 0.509844664 | 0.604 | 0.233 | 2.50E-107 | 12 ZEB1       |
| 7.00E-66   | 0.508149416 | 0.301 | 0.101 | 2.25E-61  | 12 PLAAT3     |
| 3.43E-65   | 0.507524265 | 0.512 | 0.249 | 1.10E-60  | 12 MAGI2-AS3  |
| 2.44E-44   | 0.507427121 | 0.374 | 0.174 | 7.84E-40  | 12 POU5F1     |
| 3.92E-21   | 0.507029169 | 0.66  | 0.538 | 1.26E-16  | 12 STAT3      |
| 2.25E-70   | 0.506844786 | 0.321 | 0.106 | 7.24E-66  | 12 GABBR1     |
| 1.26E-27   | 0.505976432 | 0.394 | 0.233 | 4.06E-23  | 12 DNAI4      |
| 1.59E-19   | 0.505357847 | 0.455 | 0.312 | 5.12E-15  | 12 AC087564.1 |
| 5.43E-57   | 0.50523261  | 0.273 | 0.092 | 1.74E-52  | 12 MAP3K20    |
| 2.58E-68   | 0.504983273 | 0.991 | 0.966 | 8.30E-64  | 12 ZBTB20     |
| 2.62E-56   | 0.502801739 | 0.547 | 0.273 | 8.40E-52  | 12 CALD1      |
| 8.46E-13   | 0.502537286 | 0.591 | 0.506 | 2.72E-08  | 12 ABCD3      |
| 3.96E-25   | 0.50226554  | 0.616 | 0.427 | 1.27E-20  | 12 NLGN1      |
| 7.15E-22   | 0.501975144 | 0.324 | 0.188 | 2.30E-17  | 12 ENAH       |
| 2.21E-22   | 0.500915888 | 0.673 | 0.525 | 7.11E-18  | 12 PTPN14     |
| 3.94E-27   | 0.497961389 | 0.322 | 0.173 | 1.26E-22  | 12 RASSF7     |
| 1.52E-28   | 0.496544213 | 0.458 | 0.294 | 4.88E-24  | 12 ERGIC1     |
| 2.08E-35   | 0.496369962 | 0.652 | 0.455 | 6.68E-31  | 12 NBPF19     |
| 0.00012185 | 0.494820372 | 0.459 | 0.413 | 1         | 12 AL355499.2 |
| 1.43E-32   | 0.493464707 | 0.768 | 0.614 | 4.58E-28  | 12 RBMS1      |
| 3.11E-31   | 0.493284911 | 0.483 | 0.284 | 9.99E-27  | 12 AC007319.1 |
| 2.03E-24   | 0.491401577 | 0.393 | 0.244 | 6.52E-20  | 12 SKI        |
| 5.32E-58   | 0.486918311 | 0.342 | 0.133 | 1.71E-53  | 12 CCDC40     |
| 3.11E-11   | 0.484147563 | 0.252 | 0.161 | 9.99E-07  | 12 TENM2      |
| 1.34E-30   | 0.484143703 | 0.432 | 0.258 | 4.30E-26  | 12 MLXIP      |
| 5.83E-35   | 0.483455138 | 0.341 | 0.165 | 1.87E-30  | 12 DLC1       |

|          |             |       |       |          |               |
|----------|-------------|-------|-------|----------|---------------|
| 6.12E-38 | 0.482574003 | 0.412 | 0.22  | 1.97E-33 | 12 EFHC1      |
| 3.53E-24 | 0.48007608  | 0.446 | 0.288 | 1.13E-19 | 12 AHNAK      |
| 6.19E-31 | 0.479542773 | 0.619 | 0.451 | 1.99E-26 | 12 SRSF10     |
| 8.70E-90 | 0.478507774 | 0.269 | 0.069 | 2.79E-85 | 12 AC022217.3 |
| 6.22E-29 | 0.477044793 | 0.465 | 0.283 | 2.00E-24 | 12 DIXDC1     |
| 8.32E-29 | 0.47661654  | 0.412 | 0.237 | 2.67E-24 | 12 AGBL3      |
| 3.45E-17 | 0.476605437 | 0.583 | 0.479 | 1.11E-12 | 12 PKD2       |
| 2.39E-34 | 0.475313466 | 0.498 | 0.304 | 7.69E-30 | 12 NBPF9      |
| 1.34E-35 | 0.473471626 | 0.865 | 0.728 | 4.31E-31 | 12 STAG1      |
| 1.80E-20 | 0.472650558 | 0.388 | 0.248 | 5.79E-16 | 12 MYLK       |
| 1.58E-51 | 0.471927506 | 0.35  | 0.142 | 5.09E-47 | 12 KLHL29     |
| 3.29E-19 | 0.469120607 | 0.482 | 0.351 | 1.06E-14 | 12 FBXL2      |
| 2.06E-17 | 0.466189055 | 0.325 | 0.203 | 6.60E-13 | 12 RNF144B    |
| 5.13E-14 | 0.464375984 | 0.801 | 0.697 | 1.65E-09 | 12 ZSWIM6     |
| 6.31E-25 | 0.463794056 | 0.538 | 0.381 | 2.03E-20 | 12 TMMEM14B   |
| 7.09E-37 | 0.462730896 | 0.314 | 0.145 | 2.28E-32 | 12 FAM81A     |
| 1.02E-30 | 0.462725858 | 0.308 | 0.156 | 3.29E-26 | 12 ANXA5      |
| 4.95E-19 | 0.462725376 | 0.505 | 0.366 | 1.59E-14 | 12 LATS2      |
| 7.84E-60 | 0.462213762 | 0.581 | 0.292 | 2.52E-55 | 12 PHACTR1    |
| 1.78E-27 | 0.461926534 | 0.276 | 0.136 | 5.73E-23 | 12 FLNA       |
| 3.47E-23 | 0.461116359 | 0.758 | 0.636 | 1.11E-18 | 12 TNS3       |
| 6.70E-30 | 0.46091461  | 0.273 | 0.13  | 2.15E-25 | 12 AC090825.1 |
| 1.39E-39 | 0.46035017  | 0.285 | 0.122 | 4.45E-35 | 12 DZIP1L     |
| 4.99E-26 | 0.459279576 | 0.61  | 0.444 | 1.60E-21 | 12 STXBP5     |
| 8.13E-37 | 0.459259358 | 0.422 | 0.236 | 2.61E-32 | 12 ENO4       |
| 9.51E-30 | 0.458988633 | 0.269 | 0.126 | 3.05E-25 | 12 LINC01508  |
| 6.68E-25 | 0.4578426   | 0.332 | 0.181 | 2.15E-20 | 12 AP002518.2 |
| 4.48E-16 | 0.457652723 | 0.56  | 0.451 | 1.44E-11 | 12 YWHAZ      |
| 2.30E-31 | 0.45720602  | 0.478 | 0.288 | 7.38E-27 | 12 MALT1      |
| 6.41E-60 | 0.456888711 | 0.286 | 0.097 | 2.06E-55 | 12 DNAH5      |
| 2.77E-31 | 0.455351383 | 0.279 | 0.135 | 8.91E-27 | 12 PER2       |
| 1.18E-25 | 0.454291901 | 0.298 | 0.155 | 3.78E-21 | 12 LPCAT2     |
| 1.06E-79 | 0.454085112 | 0.777 | 0.367 | 3.39E-75 | 12 LRP2       |
| 1.73E-19 | 0.453820198 | 0.472 | 0.339 | 5.56E-15 | 12 PARVA      |
| 2.39E-24 | 0.453007778 | 0.846 | 0.707 | 7.68E-20 | 12 DLG2       |
| 1.26E-23 | 0.452838825 | 0.391 | 0.233 | 4.05E-19 | 12 NR1H4      |
| 8.46E-17 | 0.45267032  | 0.378 | 0.255 | 2.72E-12 | 12 MTHFD1L    |
| 1.81E-47 | 0.450343661 | 0.325 | 0.133 | 5.81E-43 | 12 NCALD      |
| 8.40E-45 | 0.449569498 | 0.266 | 0.104 | 2.70E-40 | 12 MTSS2      |
| 4.15E-34 | 0.448553461 | 0.289 | 0.13  | 1.33E-29 | 12 JUNB       |
| 1.62E-25 | 0.447869478 | 0.298 | 0.159 | 5.19E-21 | 12 CFAP43     |
| 2.04E-17 | 0.447116785 | 0.414 | 0.296 | 6.56E-13 | 12 BIVM       |
| 4.31E-23 | 0.445853965 | 0.26  | 0.134 | 1.38E-18 | 12 JUND       |
| 3.61E-23 | 0.444508175 | 0.636 | 0.507 | 1.16E-18 | 12 PIK3CB     |
| 2.85E-11 | 0.44345973  | 0.837 | 0.798 | 9.16E-07 | 12 SIK3       |
| 1.77E-14 | 0.443149113 | 0.363 | 0.252 | 5.69E-10 | 12 MAD1L1     |
| 9.30E-37 | 0.442549802 | 0.295 | 0.135 | 2.99E-32 | 12 VAC14      |
| 3.17E-15 | 0.442007427 | 0.25  | 0.146 | 1.02E-10 | 12 TNFSF10    |
| 1.38E-22 | 0.440960786 | 0.377 | 0.232 | 4.42E-18 | 12 OSMR-AS1   |
| 1.74E-26 | 0.44091425  | 0.46  | 0.292 | 5.58E-22 | 12 FUT8       |
| 9.16E-18 | 0.440897092 | 0.538 | 0.412 | 2.94E-13 | 12 NEK11      |

|          |             |       |       |          |                 |
|----------|-------------|-------|-------|----------|-----------------|
| 1.39E-29 | 0.439446419 | 0.75  | 0.593 | 4.47E-25 | 12 EML4         |
| 2.00E-19 | 0.43933111  | 0.417 | 0.286 | 6.43E-15 | 12 USP54        |
| 1.87E-22 | 0.437302989 | 0.469 | 0.302 | 6.02E-18 | 12 NR3C1        |
| 3.36E-21 | 0.43721731  | 0.63  | 0.504 | 1.08E-16 | 12 KMT2A        |
| 3.74E-22 | 0.436751988 | 0.776 | 0.664 | 1.20E-17 | 12 RASA1        |
| 2.51E-41 | 0.436475567 | 0.318 | 0.144 | 8.06E-37 | 12 CU633906.2   |
| 2.37E-17 | 0.435414106 | 0.368 | 0.241 | 7.60E-13 | 12 NPC1         |
| 3.06E-25 | 0.434857143 | 0.377 | 0.223 | 9.82E-21 | 12 NECTIN2      |
| 1.46E-30 | 0.434212    | 0.39  | 0.214 | 4.69E-26 | 12 SYK          |
| 2.31E-12 | 0.433991308 | 0.393 | 0.29  | 7.41E-08 | 12 DMD          |
| 4.00E-24 | 0.433802553 | 0.376 | 0.211 | 1.28E-19 | 12 RMST         |
| 3.59E-14 | 0.431339471 | 0.378 | 0.267 | 1.15E-09 | 12 RPH3AL       |
| 5.11E-18 | 0.430206799 | 0.645 | 0.524 | 1.64E-13 | 12 FANCC        |
| 4.32E-21 | 0.429889741 | 0.81  | 0.681 | 1.39E-16 | 12 PLXDC2       |
| 2.15E-29 | 0.429744936 | 0.341 | 0.182 | 6.90E-25 | 12 SHROOM2      |
| 1.10E-35 | 0.428875275 | 0.376 | 0.184 | 3.55E-31 | 12 PCED1B       |
| 1.47E-26 | 0.427798609 | 0.318 | 0.165 | 4.73E-22 | 12 TPM4         |
| 2.66E-17 | 0.427790839 | 0.429 | 0.301 | 8.54E-13 | 12 MROH1        |
| 1.57E-22 | 0.427501449 | 0.335 | 0.193 | 5.04E-18 | 12 RPS6KA5      |
| 4.91E-18 | 0.426238677 | 0.429 | 0.291 | 1.58E-13 | 12 LINC01090    |
| 6.14E-17 | 0.426100918 | 0.324 | 0.205 | 1.97E-12 | 12 TNFRSF10B    |
| 6.77E-17 | 0.425091925 | 0.624 | 0.514 | 2.17E-12 | 12 NEK7         |
| 5.98E-17 | 0.424573325 | 0.604 | 0.502 | 1.92E-12 | 12 SMAD2        |
| 4.02E-38 | 0.423495756 | 0.286 | 0.126 | 1.29E-33 | 12 C1RL         |
| 8.93E-24 | 0.423418221 | 0.406 | 0.253 | 2.87E-19 | 12 INTS3        |
| 5.31E-27 | 0.421971732 | 0.427 | 0.256 | 1.71E-22 | 12 TRPC1        |
| 1.99E-45 | 0.421963345 | 0.364 | 0.16  | 6.38E-41 | 12 SRGAP2D      |
| 3.96E-23 | 0.421668063 | 0.665 | 0.53  | 1.27E-18 | 12 PTBP2        |
| 1.09E-24 | 0.421111698 | 0.404 | 0.251 | 3.51E-20 | 12 PARP8        |
| 5.23E-19 | 0.420557039 | 0.465 | 0.325 | 1.68E-14 | 12 RAD23B       |
| 2.68E-21 | 0.41911952  | 0.471 | 0.301 | 8.62E-17 | 12 ALCAM        |
| 1.50E-16 | 0.418667899 | 0.463 | 0.34  | 4.81E-12 | 12 OTUD7B       |
| 1.13E-21 | 0.418506205 | 0.481 | 0.337 | 3.64E-17 | 12 NAP1L1       |
| 3.78E-18 | 0.418362836 | 0.299 | 0.18  | 1.21E-13 | 12 SPATA17      |
| 8.06E-26 | 0.418332092 | 0.591 | 0.412 | 2.59E-21 | 12 CTNNB1       |
| 4.96E-23 | 0.417459563 | 0.58  | 0.425 | 1.59E-18 | 12 TVP23C-CDRT4 |
| 9.11E-20 | 0.417024109 | 0.295 | 0.17  | 2.93E-15 | 12 AP1S3        |
| 1.85E-41 | 0.415785677 | 0.289 | 0.122 | 5.94E-37 | 12 PHLDB1       |
| 1.17E-25 | 0.41417118  | 0.806 | 0.693 | 3.75E-21 | 12 AKAP13       |
| 9.18E-15 | 0.414053297 | 0.459 | 0.343 | 2.95E-10 | 12 PPP4R1       |
| 7.77E-16 | 0.413702424 | 0.432 | 0.304 | 2.50E-11 | 12 SFMBT2       |
| 1.91E-13 | 0.413520886 | 0.414 | 0.302 | 6.13E-09 | 12 ANKH         |
| 1.01E-23 | 0.413405445 | 0.673 | 0.52  | 3.24E-19 | 12 ZNF83        |
| 1.58E-11 | 0.410683941 | 0.282 | 0.191 | 5.08E-07 | 12 AP000787.1   |
| 1.61E-14 | 0.408303898 | 0.679 | 0.578 | 5.16E-10 | 12 SUPT3H       |
| 2.89E-18 | 0.40743716  | 0.384 | 0.255 | 9.27E-14 | 12 PPP2R1B      |
| 4.59E-26 | 0.407149324 | 0.665 | 0.476 | 1.48E-21 | 12 MYO1D        |
| 4.07E-24 | 0.406949952 | 0.788 | 0.656 | 1.31E-19 | 12 HIPK2        |
| 3.24E-15 | 0.40694192  | 0.535 | 0.429 | 1.04E-10 | 12 TTLL5        |
| 1.29E-31 | 0.406275002 | 0.705 | 0.546 | 4.13E-27 | 12 PDE3A        |
| 1.81E-16 | 0.405219215 | 0.519 | 0.395 | 5.81E-12 | 12 HSPA12A      |



|          |             |       |       |             |                 |
|----------|-------------|-------|-------|-------------|-----------------|
| 1.94E-16 | 0.404723918 | 0.512 | 0.39  | 6.24E-12    | 12 PARD6B       |
| 6.01E-20 | 0.404458756 | 0.865 | 0.771 | 1.93E-15    | 12 FARP1        |
| 1.26E-11 | 0.403573691 | 0.557 | 0.459 | 4.05E-07    | 12 JAK1         |
| 2.32E-09 | 0.403003151 | 0.285 | 0.208 | 7.46E-05    | 12 REL          |
| 1.02E-20 | 0.399318805 | 0.456 | 0.314 | 3.27E-16    | 12 STXBP3       |
| 7.33E-16 | 0.398564357 | 0.306 | 0.195 | 2.35E-11    | 12 ANKLE2       |
| 6.03E-19 | 0.398365826 | 0.57  | 0.426 | 1.94E-14    | 12 CC2D2A       |
| 4.51E-23 | 0.397409472 | 0.656 | 0.515 | 1.45E-18    | 12 HNRNPU       |
| 5.97E-26 | 0.397208262 | 0.54  | 0.361 | 1.92E-21    | 12 ENPP7P6      |
| 1.55E-16 | 0.396857938 | 0.479 | 0.357 | 4.97E-12    | 12 NUP153       |
| 3.60E-18 | 0.396846382 | 0.479 | 0.35  | 1.16E-13    | 12 SNX25        |
| 3.64E-26 | 0.39678901  | 0.591 | 0.409 | 1.17E-21    | 12 SPTAN1       |
| 1.91E-15 | 0.394544577 | 0.258 | 0.157 | 6.14E-11    | 12 HIPK1        |
| 2.38E-11 | 0.392695905 | 0.612 | 0.52  | 7.64E-07    | 12 FBXW7        |
| 2.36E-08 | 0.392617972 | 0.406 | 0.327 | 0.000758681 | 12 MEGF9        |
| 1.76E-08 | 0.390708271 | 0.671 | 0.585 | 0.000565125 | 12 WWC1         |
| 6.57E-10 | 0.390043319 | 0.576 | 0.49  | 2.11E-05    | 12 SLC20A2      |
| 1.36E-16 | 0.388248724 | 0.332 | 0.206 | 4.36E-12    | 12 MAOA         |
| 7.34E-23 | 0.388113146 | 0.321 | 0.182 | 2.36E-18    | 12 N4BP2L1      |
| 1.65E-27 | 0.387976169 | 0.915 | 0.834 | 5.31E-23    | 12 MBD5         |
| 2.69E-29 | 0.387040782 | 0.275 | 0.132 | 8.63E-25    | 12 RECK         |
| 7.77E-23 | 0.386325378 | 0.518 | 0.365 | 2.50E-18    | 12 ENSA         |
| 3.25E-15 | 0.386321287 | 0.292 | 0.181 | 1.04E-10    | 12 C21orf62-AS1 |
| 4.74E-16 | 0.386077794 | 0.761 | 0.674 | 1.52E-11    | 12 DYRK1A       |
| 7.80E-16 | 0.384764992 | 0.515 | 0.392 | 2.50E-11    | 12 AL451062.2   |
| 1.29E-11 | 0.384721079 | 0.446 | 0.35  | 4.14E-07    | 12 SUSD6        |
| 5.06E-19 | 0.383965106 | 0.489 | 0.342 | 1.63E-14    | 12 USP9Y        |
| 6.98E-12 | 0.383907627 | 0.763 | 0.675 | 2.24E-07    | 12 SHROOM3      |
| 2.97E-19 | 0.382817488 | 0.305 | 0.183 | 9.55E-15    | 12 RHOQ         |
| 9.90E-18 | 0.381755753 | 0.445 | 0.315 | 3.18E-13    | 12 KHDRBS1      |
| 4.14E-20 | 0.380936014 | 0.475 | 0.326 | 1.33E-15    | 12 NR2F2-AS1    |
| 1.29E-18 | 0.380796218 | 0.633 | 0.505 | 4.16E-14    | 12 TPT1-AS1     |
| 1.79E-12 | 0.38050234  | 0.563 | 0.449 | 5.75E-08    | 12 PLEKHA1      |
| 2.68E-20 | 0.378915428 | 0.83  | 0.723 | 8.60E-16    | 12 NF1          |
| 1.36E-08 | 0.378805852 | 0.381 | 0.293 | 0.000436281 | 12 PBX3         |
| 6.21E-19 | 0.378608591 | 0.363 | 0.236 | 1.99E-14    | 12 TMEM67       |
| 1.36E-17 | 0.377217884 | 0.555 | 0.422 | 4.37E-13    | 12 IL6ST        |
| 1.36E-14 | 0.37714366  | 0.409 | 0.294 | 4.35E-10    | 12 DLGAP4       |
| 4.86E-12 | 0.376842014 | 0.401 | 0.291 | 1.56E-07    | 12 CDH1         |
| 7.93E-19 | 0.376692866 | 0.424 | 0.293 | 2.55E-14    | 12 MED15        |
| 1.84E-28 | 0.375567591 | 0.269 | 0.13  | 5.90E-24    | 12 DDX3Y        |
| 3.82E-25 | 0.375567345 | 0.289 | 0.152 | 1.23E-20    | 12 KATNAL1      |
| 6.70E-20 | 0.375021311 | 0.363 | 0.218 | 2.15E-15    | 12 GNAI1        |
| 1.30E-24 | 0.374236461 | 0.335 | 0.189 | 4.17E-20    | 12 AC090360.1   |
| 5.60E-22 | 0.374165038 | 0.751 | 0.62  | 1.80E-17    | 12 AC058822.1   |
| 2.37E-09 | 0.373661361 | 0.472 | 0.389 | 7.62E-05    | 12 AL589935.1   |
| 6.96E-27 | 0.371933702 | 0.839 | 0.738 | 2.24E-22    | 12 PICALM       |
| 1.26E-13 | 0.368342047 | 0.413 | 0.3   | 4.06E-09    | 12 MAILR        |
| 2.44E-15 | 0.36817634  | 0.706 | 0.588 | 7.85E-11    | 12 OSBPL9       |
| 7.89E-15 | 0.367607477 | 0.338 | 0.227 | 2.53E-10    | 12 RNF145       |
| 1.85E-12 | 0.367304554 | 0.525 | 0.409 | 5.95E-08    | 12 TTTY14       |

|           |             |       |       |             |               |
|-----------|-------------|-------|-------|-------------|---------------|
| 1.22E-21  | 0.366935743 | 0.358 | 0.209 | 3.93E-17    | 12 TLE1       |
| 7.04E-21  | 0.366774324 | 0.332 | 0.196 | 2.26E-16    | 12 ICAIL      |
| 8.08E-11  | 0.366708664 | 0.394 | 0.287 | 2.60E-06    | 12 SEMA6A     |
| 3.07E-14  | 0.365448652 | 0.294 | 0.187 | 9.86E-10    | 12 AC090517.4 |
| 8.23E-07  | 0.365023405 | 0.527 | 0.463 | 0.026430462 | 12 EFR3A      |
| 9.35E-22  | 0.363161642 | 0.666 | 0.525 | 3.00E-17    | 12 GOLGA8B    |
| 3.34E-06  | 0.360825253 | 0.331 | 0.27  | 0.107254752 | 12 ENOX2      |
| 1.54E-16  | 0.360350052 | 0.494 | 0.373 | 4.95E-12    | 12 DHX9       |
| 9.22E-35  | 0.359123507 | 0.784 | 0.585 | 2.96E-30    | 12 AC068587.4 |
| 1.62E-21  | 0.357885927 | 0.266 | 0.141 | 5.22E-17    | 12 ANXA3      |
| 3.72E-29  | 0.35704731  | 0.308 | 0.157 | 1.20E-24    | 12 TAPBP      |
| 2.97E-09  | 0.357027679 | 0.584 | 0.496 | 9.54E-05    | 12 MLLT3      |
| 1.64E-08  | 0.357017374 | 0.447 | 0.374 | 0.000528304 | 12 HIVEP1     |
| 1.87E-23  | 0.356654406 | 0.315 | 0.175 | 6.01E-19    | 12 ADARB1     |
| 4.47E-16  | 0.355881527 | 0.452 | 0.291 | 1.43E-11    | 12 MIR100HG   |
| 1.00E-17  | 0.355412703 | 0.463 | 0.327 | 3.22E-13    | 12 PTPN21     |
| 3.38E-12  | 0.353964893 | 0.722 | 0.642 | 1.08E-07    | 12 CSNK1A1    |
| 1.34E-15  | 0.353605694 | 0.373 | 0.249 | 4.31E-11    | 12 SKIL       |
| 9.64E-22  | 0.353268345 | 0.872 | 0.789 | 3.10E-17    | 12 PTK2       |
| 2.01E-18  | 0.351918712 | 0.278 | 0.158 | 6.45E-14    | 12 TMEM241    |
| 7.38E-21  | 0.351485972 | 0.902 | 0.798 | 2.37E-16    | 12 SOX6       |
| 7.18E-16  | 0.351050024 | 0.311 | 0.2   | 2.31E-11    | 12 DNAJB4     |
| 8.68E-10  | 0.350953069 | 0.486 | 0.398 | 2.79E-05    | 12 CMSS1      |
| 1.33E-14  | 0.350760235 | 0.272 | 0.171 | 4.26E-10    | 12 SLC7A6     |
| 6.34E-18  | 0.350379121 | 0.253 | 0.141 | 2.04E-13    | 12 SLC41A2    |
| 3.41E-21  | 0.350348888 | 0.335 | 0.196 | 1.10E-16    | 12 LRIG3      |
| 2.16E-24  | 0.350334433 | 0.401 | 0.239 | 6.95E-20    | 12 AC092902.4 |
| 5.99E-20  | 0.350270328 | 0.56  | 0.391 | 1.92E-15    | 12 PDGFC      |
| 9.34E-29  | 0.350227376 | 0.666 | 0.46  | 3.00E-24    | 12 ANKRD36B   |
| 8.44E-13  | 0.34995729  | 0.314 | 0.214 | 2.71E-08    | 12 WDR35      |
| 7.60E-20  | 0.349233729 | 0.787 | 0.679 | 2.44E-15    | 12 EIF4G3     |
| 9.17E-10  | 0.34891176  | 0.292 | 0.209 | 2.95E-05    | 12 SOCS5      |
| 1.00E-08  | 0.348868651 | 0.554 | 0.472 | 0.000321382 | 12 COBL       |
| 6.84E-13  | 0.348170025 | 0.383 | 0.28  | 2.20E-08    | 12 PRKD3      |
| 1.03E-19  | 0.348034009 | 0.435 | 0.289 | 3.30E-15    | 12 PRMT2      |
| 5.89E-16  | 0.346530062 | 0.522 | 0.393 | 1.89E-11    | 12 CAMSAP2    |
| 3.46E-12  | 0.345729664 | 0.521 | 0.415 | 1.11E-07    | 12 DNAH7      |
| 2.79E-17  | 0.345326249 | 0.645 | 0.507 | 8.97E-13    | 12 PPP1CB     |
| 8.17E-25  | 0.34471287  | 0.432 | 0.266 | 2.62E-20    | 12 NBPF10     |
| 8.32E-07  | 0.344503525 | 0.36  | 0.293 | 0.026713743 | 12 LAMC1      |
| 1.56E-22  | 0.344264016 | 0.659 | 0.507 | 5.02E-18    | 12 ARGLU1     |
| 6.84E-13  | 0.343871357 | 0.412 | 0.305 | 2.20E-08    | 12 CFAP69     |
| 9.73E-12  | 0.343849421 | 0.413 | 0.307 | 3.13E-07    | 12 DENND5A    |
| 1.12E-12  | 0.343321908 | 0.361 | 0.257 | 3.59E-08    | 12 AC073283.3 |
| 2.37E-21  | 0.342033711 | 0.337 | 0.201 | 7.62E-17    | 12 LBR        |
| 9.37E-09  | 0.341695159 | 0.381 | 0.298 | 0.000300896 | 12 PRIM2      |
| 7.21E-283 | 0.341647956 | 0.594 | 0.111 | 2.32E-278   | 12 MEIS2      |
| 4.53E-22  | 0.340724119 | 0.283 | 0.152 | 1.45E-17    | 12 SNX8       |
| 4.52E-13  | 0.340621704 | 0.355 | 0.252 | 1.45E-08    | 12 SGCE       |
| 1.21E-09  | 0.339284707 | 0.74  | 0.682 | 3.88E-05    | 12 HNRNPC     |
| 5.42E-13  | 0.338969075 | 0.717 | 0.623 | 1.74E-08    | 12 PPP1R9A    |

|          |             |       |       |             |                 |
|----------|-------------|-------|-------|-------------|-----------------|
| 2.49E-08 | 0.338720084 | 0.38  | 0.303 | 0.000799803 | 12 TRAF3IP2-AS1 |
| 2.44E-19 | 0.337183083 | 0.367 | 0.226 | 7.84E-15    | 12 TNFRSF19     |
| 2.76E-10 | 0.334146229 | 0.557 | 0.469 | 8.85E-06    | 12 ZMYND8       |
| 5.31E-14 | 0.334102842 | 0.449 | 0.334 | 1.70E-09    | 12 PAXBP1       |
| 2.05E-15 | 0.334031871 | 0.311 | 0.2   | 6.59E-11    | 12 TRAF3IP1     |
| 1.51E-14 | 0.33283544  | 0.548 | 0.429 | 4.84E-10    | 12 MCPH1        |
| 3.29E-08 | 0.331707341 | 0.463 | 0.384 | 0.001055499 | 12 PDZD8        |
| 8.99E-14 | 0.331584846 | 0.406 | 0.286 | 2.89E-09    | 12 GSAP         |
| 6.19E-16 | 0.331357052 | 0.376 | 0.253 | 1.99E-11    | 12 SHTN1        |
| 3.91E-14 | 0.331041378 | 0.482 | 0.356 | 1.26E-09    | 12 SPTLC3       |
| 5.88E-13 | 0.33077759  | 0.553 | 0.448 | 1.89E-08    | 12 AGFG1        |
| 3.92E-15 | 0.330571189 | 0.724 | 0.616 | 1.26E-10    | 12 SPAG9        |
| 3.55E-09 | 0.325972371 | 0.612 | 0.536 | 0.00011408  | 12 MRPL33       |
| 2.32E-12 | 0.324575774 | 0.406 | 0.302 | 7.46E-08    | 12 DAP          |
| 2.19E-20 | 0.323966874 | 0.56  | 0.419 | 7.03E-16    | 12 ASAP1        |
| 2.64E-14 | 0.323187435 | 0.553 | 0.441 | 8.49E-10    | 12 ABI2         |
| 2.58E-09 | 0.322385119 | 0.4   | 0.305 | 8.30E-05    | 12 ABCB1        |
| 5.92E-09 | 0.322197835 | 0.724 | 0.661 | 0.000189987 | 12 ZCCHC7       |
| 2.72E-15 | 0.321718233 | 0.38  | 0.256 | 8.73E-11    | 12 C11orf54     |
| 1.41E-10 | 0.321708591 | 0.463 | 0.367 | 4.51E-06    | 12 RIF1         |
| 2.03E-10 | 0.320263607 | 0.463 | 0.358 | 6.52E-06    | 12 TTC39B       |
| 1.29E-08 | 0.319678803 | 0.603 | 0.533 | 0.00041271  | 12 VGLL4        |
| 4.44E-08 | 0.319252499 | 0.668 | 0.621 | 0.001424718 | 12 PDE10A       |
| 6.28E-14 | 0.318868241 | 0.473 | 0.361 | 2.02E-09    | 12 IFT43        |
| 5.64E-09 | 0.318687285 | 0.424 | 0.34  | 0.000181067 | 12 SPTLC2       |
| 1.08E-07 | 0.316988485 | 0.495 | 0.425 | 0.003479377 | 12 SPATA5       |
| 1.29E-11 | 0.316857751 | 0.469 | 0.367 | 4.15E-07    | 12 GOLPH3       |
| 7.92E-14 | 0.316730453 | 0.322 | 0.216 | 2.54E-09    | 12 LRRC6        |
| 4.98E-11 | 0.316536117 | 0.404 | 0.311 | 1.60E-06    | 12 CAPZA2       |
| 3.79E-15 | 0.316319019 | 0.373 | 0.251 | 1.22E-10    | 12 ATP9A        |
| 3.83E-09 | 0.316226848 | 0.295 | 0.217 | 0.000122895 | 12 AC005520.1   |
| 1.16E-13 | 0.314683063 | 0.282 | 0.175 | 3.71E-09    | 12 LTBP3        |
| 1.02E-12 | 0.313396755 | 0.404 | 0.296 | 3.27E-08    | 12 OBSCN        |
| 1.34E-15 | 0.312239516 | 0.298 | 0.187 | 4.31E-11    | 12 NPHP1        |
| 1.51E-11 | 0.310596062 | 0.468 | 0.367 | 4.86E-07    | 12 PITPNB       |
| 1.21E-06 | 0.310455693 | 0.633 | 0.556 | 0.038879366 | 12 PPP3CA       |
| 8.67E-13 | 0.309713351 | 0.279 | 0.181 | 2.79E-08    | 12 PARP11       |
| 1.54E-13 | 0.308830056 | 0.705 | 0.594 | 4.93E-09    | 12 WWC2         |
| 2.10E-11 | 0.308329188 | 0.294 | 0.206 | 6.73E-07    | 12 TBC1D22B     |
| 6.19E-20 | 0.308136278 | 0.304 | 0.169 | 1.99E-15    | 12 COL4A6       |
| 1.14E-11 | 0.308083815 | 0.383 | 0.282 | 3.67E-07    | 12 HOOK1        |
| 1.39E-44 | 0.30744637  | 0.626 | 0.342 | 4.48E-40    | 12 BMPR1B       |
| 2.42E-08 | 0.307164468 | 0.311 | 0.23  | 0.000777244 | 12 CNIH3        |
| 6.99E-15 | 0.30685051  | 0.424 | 0.304 | 2.25E-10    | 12 LENG8        |
| 4.80E-17 | 0.306713354 | 0.283 | 0.171 | 1.54E-12    | 12 ZNF706       |
| 3.42E-13 | 0.306624805 | 0.571 | 0.466 | 1.10E-08    | 12 SEPTIN2      |
| 2.65E-17 | 0.306186521 | 0.388 | 0.257 | 8.50E-13    | 12 LINC02614    |
| 1.61E-16 | 0.305367417 | 0.55  | 0.417 | 5.17E-12    | 12 RASA2        |
| 9.47E-21 | 0.305148053 | 0.357 | 0.217 | 3.04E-16    | 12 NBPF20       |
| 6.54E-15 | 0.30514024  | 0.669 | 0.562 | 2.10E-10    | 12 UVRAG        |
| 1.46E-08 | 0.305044155 | 0.266 | 0.187 | 0.000470248 | 12 LEPR         |

|           |             |       |       |             |               |
|-----------|-------------|-------|-------|-------------|---------------|
| 3.98E-14  | 0.304826882 | 0.692 | 0.575 | 1.28E-09    | 12 AFF4       |
| 2.36E-11  | 0.304816206 | 0.599 | 0.496 | 7.58E-07    | 12 CCDC18-AS1 |
| 7.27E-13  | 0.303799353 | 0.345 | 0.232 | 2.34E-08    | 12 TBC1D16    |
| 2.53E-12  | 0.302914752 | 0.551 | 0.446 | 8.14E-08    | 12 UBAP1      |
| 0.0002617 | 0.302217163 | 0.443 | 0.401 | 1           | 12 PPM1H      |
| 1.54E-13  | 0.302145129 | 0.735 | 0.632 | 4.94E-09    | 12 POGZ       |
| 8.46E-14  | 0.301076507 | 0.298 | 0.194 | 2.72E-09    | 12 SLC37A3    |
| 9.35E-18  | 0.30067833  | 0.256 | 0.144 | 3.00E-13    | 12 HDAC7      |
| 1.57E-06  | 0.300334406 | 0.471 | 0.41  | 0.05055346  | 12 PPM1B      |
| 5.18E-10  | 0.300329151 | 0.649 | 0.57  | 1.66E-05    | 12 UBE2D3     |
| 1.87E-08  | 0.300093643 | 0.596 | 0.528 | 0.000599897 | 12 AF117829.1 |
| 9.54E-08  | 0.300032449 | 0.348 | 0.268 | 0.003064272 | 12 TBC1D12    |
| 1.91E-07  | 0.299958727 | 0.433 | 0.355 | 0.006120445 | 12 STON2      |
| 5.27E-12  | 0.29991828  | 0.391 | 0.285 | 1.69E-07    | 12 ZNF800     |
| 3.11E-11  | 0.299909652 | 0.41  | 0.31  | 9.98E-07    | 12 RAB21      |
| 2.96E-14  | 0.299664204 | 0.59  | 0.472 | 9.49E-10    | 12 DMTF1      |
| 1.31E-13  | 0.299352133 | 0.545 | 0.436 | 4.20E-09    | 12 GOLGA8A    |
| 2.63E-18  | 0.299173439 | 0.268 | 0.154 | 8.46E-14    | 12 IFNGR1     |
| 3.76E-15  | 0.298087844 | 0.721 | 0.619 | 1.21E-10    | 12 WAC        |
| 1.58E-13  | 0.295315025 | 0.275 | 0.174 | 5.06E-09    | 12 TEC        |
| 0.0003567 | 0.29496281  | 0.253 | 0.207 | 1           | 12 CAB39L     |
| 4.82E-14  | 0.294833167 | 0.529 | 0.402 | 1.55E-09    | 12 NBPF12     |
| 4.27E-09  | 0.292764834 | 0.283 | 0.204 | 0.000137064 | 12 EIF2AK4    |
| 1.89E-09  | 0.292574101 | 0.492 | 0.396 | 6.08E-05    | 12 PCNX2      |
| 7.70E-12  | 0.291937881 | 0.463 | 0.357 | 2.47E-07    | 12 TEX9       |
| 1.94E-08  | 0.291925982 | 0.324 | 0.245 | 0.000623901 | 12 PTPDC1     |
| 2.50E-15  | 0.291365772 | 0.269 | 0.166 | 8.02E-11    | 12 EIF3M      |
| 7.72E-06  | 0.290768398 | 0.445 | 0.381 | 0.247966023 | 12 MYO5B      |
| 2.67E-14  | 0.290703377 | 0.635 | 0.517 | 8.57E-10    | 12 CCNL1      |
| 1.86E-20  | 0.290376511 | 0.377 | 0.227 | 5.98E-16    | 12 ZBTB46     |
| 9.97E-09  | 0.289696002 | 0.304 | 0.222 | 0.00032006  | 12 DNAH6      |
| 2.55E-11  | 0.288664646 | 0.289 | 0.191 | 8.19E-07    | 12 PNPLA7     |
| 7.18E-13  | 0.288466256 | 0.334 | 0.227 | 2.31E-08    | 12 RNF217     |
| 1.33E-11  | 0.288417167 | 0.58  | 0.473 | 4.27E-07    | 12 FAM13B     |
| 5.81E-12  | 0.287055873 | 0.591 | 0.484 | 1.86E-07    | 12 YWHAE      |
| 8.83E-09  | 0.286937205 | 0.478 | 0.388 | 0.000283594 | 12 EFCAB2     |
| 6.67E-11  | 0.28690982  | 0.41  | 0.313 | 2.14E-06    | 12 POLR2B     |
| 1.94E-07  | 0.286842733 | 0.591 | 0.527 | 0.006246024 | 12 LIFR       |
| 1.37E-11  | 0.285917419 | 0.456 | 0.35  | 4.40E-07    | 12 GABPB1-AS1 |
| 1.41E-11  | 0.285591082 | 0.59  | 0.492 | 4.54E-07    | 12 ATXN10     |
| 9.45E-09  | 0.285497231 | 0.528 | 0.44  | 0.000303403 | 12 SEPTIN11   |
| 1.60E-09  | 0.285348824 | 0.312 | 0.222 | 5.12E-05    | 12 TXNRD1     |
| 1.12E-14  | 0.284520924 | 0.891 | 0.813 | 3.59E-10    | 12 MAPK10     |
| 8.37E-16  | 0.284156428 | 0.276 | 0.164 | 2.69E-11    | 12 SH3KBP1    |
| 1.41E-06  | 0.283379968 | 0.311 | 0.241 | 0.045271618 | 12 ADGRV1     |
| 9.60E-10  | 0.28325378  | 0.601 | 0.507 | 3.08E-05    | 12 EPC1       |
| 3.10E-12  | 0.283041656 | 0.296 | 0.196 | 9.94E-08    | 12 DEK        |
| 3.51E-19  | 0.281744117 | 0.957 | 0.918 | 1.13E-14    | 12 FTX        |
| 2.04E-13  | 0.281504076 | 0.272 | 0.172 | 6.55E-09    | 12 SF11       |
| 2.06E-11  | 0.281217903 | 0.39  | 0.291 | 6.63E-07    | 12 ARNT       |
| 2.15E-08  | 0.281181464 | 0.458 | 0.376 | 0.000689151 | 12 SEC23A     |

|            |             |       |       |             |             |
|------------|-------------|-------|-------|-------------|-------------|
| 1.72E-05   | 0.281116958 | 0.538 | 0.482 | 0.552849135 | 12 RORA-AS1 |
| 4.11E-09   | 0.280143896 | 0.319 | 0.232 | 0.000132039 | 12 CDRT4    |
| 8.88E-10   | 0.280081822 | 0.565 | 0.464 | 2.85E-05    | 12 MCU      |
| 9.35E-09   | 0.279685602 | 0.332 | 0.25  | 0.000300288 | 12 SIMC1    |
| 4.05E-14   | 0.27949529  | 0.42  | 0.292 | 1.30E-09    | 12 CCND3    |
| 8.80E-06   | 0.279035483 | 0.327 | 0.267 | 0.282664109 | 12 LEPROT   |
| 6.51E-07   | 0.278403208 | 0.327 | 0.257 | 0.020896578 | 12 ERI2     |
| 1.70E-11   | 0.278002651 | 0.388 | 0.291 | 5.46E-07    | 12 KATNIP   |
| 3.52E-12   | 0.277193692 | 0.675 | 0.572 | 1.13E-07    | 12 LUC7L2   |
| 1.86E-11   | 0.276790332 | 0.662 | 0.568 | 5.96E-07    | 12 UGGT2    |
| 7.34E-12   | 0.276291397 | 0.471 | 0.365 | 2.36E-07    | 12 HGSNAT   |
| 4.45E-14   | 0.276098329 | 0.25  | 0.151 | 1.43E-09    | 12 AMOTL1   |
| 7.48E-13   | 0.275369099 | 0.443 | 0.32  | 2.40E-08    | 12 ALG13    |
| 6.48E-12   | 0.27376372  | 0.606 | 0.493 | 2.08E-07    | 12 GNB1     |
| 1.73E-12   | 0.273578927 | 0.804 | 0.713 | 5.56E-08    | 12 CDKAL1   |
| 1.97E-10   | 0.273561686 | 0.422 | 0.32  | 6.31E-06    | 12 PARP14   |
| 3.93E-24   | 0.272667309 | 0.328 | 0.177 | 1.26E-19    | 12 ARHGAP28 |
| 1.27E-09   | 0.271396182 | 0.465 | 0.365 | 4.08E-05    | 12 CAPN2    |
| 8.04E-05   | 0.271009491 | 0.414 | 0.354 | 1           | 12 AASS     |
| 2.09E-17   | 0.269941146 | 0.321 | 0.195 | 6.71E-13    | 12 PDCD4    |
| 1.00E-08   | 0.269087876 | 0.492 | 0.408 | 0.000322672 | 12 MIPOL1   |
| 7.81E-10   | 0.26860836  | 0.373 | 0.272 | 2.51E-05    | 12 MSN      |
| 4.54E-08   | 0.268580421 | 0.502 | 0.425 | 0.001457224 | 12 DAAM1    |
| 2.37E-09   | 0.268080056 | 0.704 | 0.639 | 7.61E-05    | 12 GPBP1    |
| 2.61E-07   | 0.267490937 | 0.499 | 0.424 | 0.008386863 | 12 MAP3K1   |
| 3.73E-15   | 0.267167379 | 0.927 | 0.793 | 1.20E-10    | 12 MAML2    |
| 3.23E-13   | 0.267054045 | 0.675 | 0.569 | 1.04E-08    | 12 TAF1D    |
| 1.74E-10   | 0.266459871 | 0.518 | 0.415 | 5.57E-06    | 12 HNRNPD   |
| 1.88E-05   | 0.264957701 | 0.341 | 0.276 | 0.604081771 | 12 CDKL5    |
| 2.24E-08   | 0.264588346 | 0.4   | 0.32  | 0.000719283 | 12 CEP83    |
| 6.53E-12   | 0.264470064 | 0.393 | 0.294 | 2.10E-07    | 12 MORF4L1  |
| 1.10E-09   | 0.264081663 | 0.397 | 0.306 | 3.55E-05    | 12 LEMD3    |
| 2.19E-24   | 0.263997988 | 0.919 | 0.782 | 7.03E-20    | 12 GLIS3    |
| 1.14E-09   | 0.263642942 | 0.315 | 0.225 | 3.67E-05    | 12 FAM228B  |
| 0.00046768 | 0.263393515 | 0.296 | 0.243 | 1           | 12 DIRC3    |
| 0.00031848 | 0.262836806 | 0.578 | 0.542 | 1           | 12 LRRFIP2  |
| 4.46E-06   | 0.262818881 | 0.643 | 0.582 | 0.143104293 | 12 GCC2     |
| 2.81E-08   | 0.262293517 | 0.374 | 0.293 | 0.0009035   | 12 NUP58    |
| 5.34E-12   | 0.261311504 | 0.437 | 0.33  | 1.72E-07    | 12 NSD2     |
| 1.60E-11   | 0.261138193 | 0.432 | 0.325 | 5.13E-07    | 12 PTPN12   |
| 2.60E-09   | 0.260970634 | 0.407 | 0.318 | 8.36E-05    | 12 TTBK2    |
| 2.85E-07   | 0.260911732 | 0.696 | 0.619 | 0.009155521 | 12 DNAH14   |
| 2.72E-08   | 0.26078515  | 0.414 | 0.326 | 0.000873069 | 12 HECTD2   |
| 2.70E-09   | 0.259658097 | 0.41  | 0.322 | 8.66E-05    | 12 CCNI     |
| 1.54E-07   | 0.258861609 | 0.278 | 0.203 | 0.004932692 | 12 PLCH1    |
| 5.34E-07   | 0.258676903 | 0.331 | 0.255 | 0.017135096 | 12 WDR44    |
| 4.20E-05   | 0.257763033 | 0.381 | 0.324 | 1           | 12 MIPEP    |
| 3.79E-12   | 0.25706421  | 0.286 | 0.191 | 1.22E-07    | 12 RABL2A   |
| 7.78E-05   | 0.256943979 | 0.548 | 0.504 | 1           | 12 PHF21A   |
| 5.20E-12   | 0.256924548 | 0.563 | 0.454 | 1.67E-07    | 12 RNF216   |
| 3.14E-10   | 0.256918495 | 0.363 | 0.268 | 1.01E-05    | 12 PPP1R10  |

|            |             |       |       |             |                |
|------------|-------------|-------|-------|-------------|----------------|
| 2.37E-08   | 0.255043372 | 0.719 | 0.644 | 0.000759695 | 12 RAPGEF2     |
| 1.84E-07   | 0.254212373 | 0.43  | 0.354 | 0.005911714 | 12 DCUN1D4     |
| 9.79E-09   | 0.253935206 | 0.6   | 0.52  | 0.000314514 | 12 CSPP1       |
| 2.87E-10   | 0.253422272 | 0.271 | 0.183 | 9.22E-06    | 12 CYLD        |
| 0.00012475 | 0.253422099 | 0.599 | 0.531 | 1           | 12 NCKAP5      |
| 2.43E-07   | 0.253003066 | 0.783 | 0.715 | 0.007799282 | 12 BRAF        |
| 1.17E-13   | 0.252987346 | 0.25  | 0.15  | 3.76E-09    | 12 FGFR1       |
| 2.16E-10   | 0.252639253 | 0.763 | 0.688 | 6.92E-06    | 12 RBM39       |
| 3.15E-10   | 0.252179369 | 0.741 | 0.676 | 1.01E-05    | 12 DLG1        |
| 9.32E-07   | 0.25208271  | 0.714 | 0.652 | 0.029940497 | 12 CTNNA1      |
| 8.02E-12   | 0.251903981 | 0.544 | 0.426 | 2.57E-07    | 12 SKAP2       |
| 1.48E-08   | 0.251513012 | 0.59  | 0.51  | 0.000474425 | 12 RB1         |
| 5.63E-12   | 0.251490372 | 0.292 | 0.193 | 1.81E-07    | 12 CCNYL1      |
| 4.35E-05   | 0.251250727 | 0.66  | 0.615 | 1           | 12 SIPA1L1     |
| 6.94E-14   | 0.250265295 | 0.791 | 0.693 | 2.23E-09    | 12 HNRNPA2B1   |
| 0.00013779 | 0.250136227 | 0.471 | 0.418 | 1           | 12 RNF180      |
| 0          | 6.21191322  | 0.99  | 0.077 | 0           | 13 PTPRQ       |
| 0          | 6.138297663 | 0.994 | 0.06  | 0           | 13 PTPRO       |
| 0          | 5.515314387 | 0.997 | 0.155 | 0           | 13 PLA2R1      |
| 0          | 5.46281112  | 0.998 | 0.766 | 0           | 13 MAGI2       |
| 0          | 4.97081132  | 0.989 | 0.15  | 0           | 13 ST6GALNAC3  |
| 0          | 4.890437728 | 0.977 | 0.045 | 0           | 13 NTNG1       |
| 0          | 4.462552344 | 0.992 | 0.067 | 0           | 13 CLIC5       |
| 0          | 4.072465239 | 0.992 | 0.24  | 0           | 13 NPAS3       |
| 0          | 3.822874824 | 0.942 | 0.022 | 0           | 13 NPHS2       |
| 0          | 3.791062372 | 0.945 | 0.046 | 0           | 13 FMN2        |
| 0          | 3.776426828 | 0.981 | 0.141 | 0           | 13 PLCE1       |
| 0          | 3.775390488 | 0.815 | 0.079 | 0           | 13 AC109466.1  |
| 0          | 3.653924396 | 0.982 | 0.37  | 0           | 13 DPP6        |
| 0          | 3.637490211 | 0.925 | 0.036 | 0           | 13 ADAMTS19    |
| 0          | 3.617631248 | 0.968 | 0.052 | 0           | 13 ATP10A      |
| 0          | 3.61495332  | 0.948 | 0.357 | 0           | 13 IQCJ-SCHIP1 |
| 0          | 3.596904101 | 0.981 | 0.446 | 0           | 13 DACH1       |
| 0          | 3.579403102 | 0.972 | 0.236 | 0           | 13 MAGI2-AS3   |
| 0          | 3.507219207 | 0.976 | 0.288 | 0           | 13 SRGAP2      |
| 0          | 3.444260961 | 0.966 | 0.267 | 0           | 13 SRGAP2C     |
| 0          | 3.388632442 | 0.977 | 0.031 | 0           | 13 NPHS1       |
| 0          | 3.383638186 | 0.929 | 0.039 | 0           | 13 TARID       |
| 0          | 3.30652364  | 0.969 | 0.248 | 0           | 13 SRGAP2B     |
| 0          | 3.278753277 | 0.977 | 0.257 | 0           | 13 SEMA5A      |
| 0          | 3.259760336 | 0.922 | 0.066 | 0           | 13 ALS2CL      |
| 0          | 3.255885178 | 0.943 | 0.265 | 0           | 13 CDC14A      |
| 0          | 3.151852927 | 0.695 | 0.015 | 0           | 13 ZNF804A     |
| 0          | 3.135807701 | 0.922 | 0.141 | 0           | 13 SPOCK1      |
| 0          | 3.099943523 | 0.921 | 0.126 | 0           | 13 KLHL29      |
| 0          | 3.05737597  | 0.843 | 0.005 | 0           | 13 AC092813.2  |
| 0          | 3.041750004 | 0.95  | 0.049 | 0           | 13 NFASC       |
| 0          | 2.973272414 | 0.937 | 0.159 | 0           | 13 ARHGAP28    |
| 0          | 2.948821778 | 0.882 | 0.018 | 0           | 13 CR1         |
| 0          | 2.937998767 | 0.901 | 0.144 | 0           | 13 ZDHHC6      |
| 0          | 2.927677177 | 0.938 | 0.098 | 0           | 13 PODXL       |

|           |             |       |       |           |               |
|-----------|-------------|-------|-------|-----------|---------------|
| 0         | 2.922689429 | 0.927 | 0.128 | 0         | 13 RYR3       |
| 0         | 2.918014207 | 0.982 | 0.562 | 0         | 13 NEBL       |
| 0         | 2.880352899 | 0.875 | 0.115 | 0         | 13 SPRY4-AS1  |
| 0         | 2.864207747 | 0.956 | 0.567 | 0         | 13 CCDC91     |
| 0         | 2.864124894 | 0.895 | 0.079 | 0         | 13 CCBE1      |
| 0         | 2.838799305 | 0.979 | 0.571 | 0         | 13 AL359736.1 |
| 0         | 2.811377387 | 0.83  | 0.029 | 0         | 13 FGF1       |
| 0         | 2.810058134 | 0.961 | 0.321 | 0         | 13 ST3GAL6    |
| 0         | 2.802040295 | 0.943 | 0.236 | 0         | 13 TGFBR3     |
| 0         | 2.799385711 | 0.851 | 0.255 | 0         | 13 INTS12     |
| 0         | 2.775063651 | 0.783 | 0.046 | 0         | 13 DACH2      |
| 0         | 2.7676641   | 0.969 | 0.363 | 0         | 13 IQGAP2     |
| 0         | 2.75573671  | 0.947 | 0.294 | 0         | 13 DOCK5      |
| 0         | 2.748858345 | 0.903 | 0.033 | 0         | 13 WT1        |
| 0         | 2.716413288 | 0.959 | 0.374 | 0         | 13 RERG       |
| 0         | 2.704660761 | 0.971 | 0.675 | 0         | 13 VTI1A      |
| 0         | 2.655587242 | 0.896 | 0.142 | 0         | 13 TENM2      |
| 0         | 2.65184063  | 0.922 | 0.294 | 0         | 13 NPNT       |
| 0         | 2.643809528 | 0.961 | 0.281 | 0         | 13 VEGFA      |
| 0         | 2.642041674 | 0.914 | 0.056 | 0         | 13 ABLIM2     |
| 0         | 2.601840106 | 0.909 | 0.087 | 0         | 13 FYN        |
| 0         | 2.594271403 | 0.825 | 0.072 | 0         | 13 ARHGEF26   |
| 0         | 2.556755409 | 0.935 | 0.354 | 0         | 13 MGAT5      |
| 0         | 2.556320972 | 0.977 | 0.561 | 0         | 13 CBLB       |
| 0         | 2.538903235 | 0.943 | 0.341 | 0         | 13 SRGAP1     |
| 0         | 2.517840028 | 0.972 | 0.363 | 0         | 13 PTPRD      |
| 0         | 2.509010833 | 0.953 | 0.365 | 0         | 13 FRY        |
| 0         | 2.504466271 | 0.992 | 0.55  | 0         | 13 COL4A3     |
| 0         | 2.498476924 | 0.629 | 0.045 | 0         | 13 AC008415.1 |
| 0         | 2.441804739 | 0.992 | 0.809 | 0         | 13 PARD3B     |
| 0         | 2.410523114 | 0.981 | 0.302 | 0         | 13 MME        |
| 0         | 2.407344422 | 0.831 | 0.126 | 0         | 13 SHISA6     |
| 0         | 2.392077603 | 0.885 | 0.264 | 0         | 13 CERS6      |
| 0         | 2.371428079 | 0.888 | 0.145 | 0         | 13 SRGAP2D    |
| 1.50E-236 | 2.331105704 | 0.684 | 0.206 | 4.81E-232 | 13 SOX2-OT    |
| 0         | 2.297624585 | 0.969 | 0.536 | 0         | 13 TJP1       |
| 0         | 2.247465483 | 0.674 | 0.044 | 0         | 13 DYNC111    |
| 0         | 2.229452901 | 0.867 | 0.185 | 0         | 13 UNC5C      |
| 0         | 2.221709943 | 0.789 | 0.015 | 0         | 13 PCOLCE2    |
| 0         | 2.194494419 | 0.969 | 0.557 | 0         | 13 LARGE1     |
| 0         | 2.175454476 | 0.635 | 0.091 | 0         | 13 LINC02006  |
| 0         | 2.155783179 | 0.87  | 0.263 | 0         | 13 EXPH5      |
| 0         | 2.12726592  | 0.708 | 0.015 | 0         | 13 WDR49      |
| 0         | 2.081773302 | 0.799 | 0.04  | 0         | 13 LRRC2      |
| 0         | 2.070515354 | 0.783 | 0.035 | 0         | 13 PTGDS      |
| 0         | 2.060899061 | 0.728 | 0.016 | 0         | 13 LINC02798  |
| 0         | 2.059656132 | 0.828 | 0.163 | 0         | 13 TENM3      |
| 0         | 2.048190402 | 0.867 | 0.142 | 0         | 13 KIRREL1    |
| 0         | 2.035340436 | 0.937 | 0.281 | 0         | 13 ENPEP      |
| 0         | 2.032786761 | 0.859 | 0.15  | 0         | 13 EYA4       |
| 0         | 2.020460737 | 0.611 | 0.044 | 0         | 13 AC026316.4 |

|           |             |       |       |           |               |
|-----------|-------------|-------|-------|-----------|---------------|
| 0         | 2.020204785 | 0.797 | 0.062 | 0         | 13 NECAB1     |
| 0         | 2.014049582 | 0.825 | 0.067 | 0         | 13 SULF1      |
| 0         | 1.99173324  | 0.84  | 0.167 | 0         | 13 FBXL7      |
| 0         | 1.980066798 | 0.794 | 0.042 | 0         | 13 WIPF3      |
| 0         | 1.968390414 | 0.799 | 0.056 | 0         | 13 ZBTB7C     |
| 0         | 1.953677628 | 0.734 | 0.092 | 0         | 13 GRIK2      |
| 3.74E-298 | 1.946079377 | 0.979 | 0.555 | 1.20E-293 | 13 DST        |
| 1.14E-280 | 1.939652121 | 0.966 | 0.553 | 3.65E-276 | 13 MYO1E      |
| 0         | 1.928350985 | 0.812 | 0.168 | 0         | 13 ROBO2      |
| 0         | 1.921537525 | 0.642 | 0.016 | 0         | 13 NDNF       |
| 0         | 1.920346602 | 0.775 | 0.074 | 0         | 13 GRK5       |
| 2.08E-224 | 1.91799644  | 0.823 | 0.305 | 6.67E-220 | 13 RBFOX1     |
| 0         | 1.917587628 | 0.759 | 0.09  | 0         | 13 GRIK1      |
| 1.63E-237 | 1.915386708 | 0.888 | 0.421 | 5.24E-233 | 13 CPNE8      |
| 0         | 1.906395679 | 0.71  | 0.017 | 0         | 13 LINC00839  |
| 5.53E-290 | 1.903420798 | 0.953 | 0.672 | 1.78E-285 | 13 ARMH4      |
| 1.15E-251 | 1.893813901 | 0.935 | 0.498 | 3.71E-247 | 13 ARHGEF3    |
| 0         | 1.88980499  | 0.867 | 0.268 | 0         | 13 CLIP4      |
| 1.02E-279 | 1.889532185 | 0.891 | 0.382 | 3.27E-275 | 13 MPP5       |
| 2.61E-258 | 1.873692292 | 0.953 | 0.564 | 8.37E-254 | 13 MTSS1      |
| 0         | 1.872061536 | 0.822 | 0.132 | 0         | 13 RIPOR1     |
| 7.95E-291 | 1.871433245 | 0.859 | 0.292 | 2.55E-286 | 13 SFMBT2     |
| 2.13E-292 | 1.862860264 | 0.95  | 0.505 | 6.84E-288 | 13 PDE4DIP    |
| 3.07E-287 | 1.85581814  | 0.932 | 0.467 | 9.87E-283 | 13 AC241952.1 |
| 0         | 1.844611324 | 0.759 | 0.043 | 0         | 13 AC027682.6 |
| 0         | 1.843700322 | 0.89  | 0.196 | 0         | 13 TCF7L1     |
| 0         | 1.840802351 | 0.844 | 0.171 | 0         | 13 PCED1B     |
| 0         | 1.836314323 | 0.789 | 0.08  | 0         | 13 MSRB3      |
| 9.71E-186 | 1.82623001  | 0.867 | 0.417 | 3.12E-181 | 13 GPC6       |
| 4.38E-252 | 1.817756475 | 0.951 | 0.565 | 1.41E-247 | 13 CRIM1      |
| 2.50E-296 | 1.816338156 | 0.938 | 0.356 | 8.02E-292 | 13 CACNB2     |
| 2.28E-248 | 1.81000867  | 0.937 | 0.499 | 7.31E-244 | 13 UACA       |
| 0         | 1.789374726 | 0.689 | 0.137 | 0         | 13 ARRDC4     |
| 6.45E-243 | 1.773534195 | 0.828 | 0.34  | 2.07E-238 | 13 SNX25      |
| 0         | 1.767647128 | 0.853 | 0.202 | 0         | 13 ANKRD33B   |
| 0         | 1.761583026 | 0.661 | 0.101 | 0         | 13 TRPC6      |
| 0         | 1.76039712  | 0.699 | 0.036 | 0         | 13 TSPAN2     |
| 0         | 1.759396029 | 0.812 | 0.223 | 0         | 13 SERINC5    |
| 0         | 1.758235456 | 0.493 | 0.047 | 0         | 13 CCN2       |
| 9.87E-302 | 1.75434987  | 0.895 | 0.274 | 3.17E-297 | 13 SGIP1      |
| 6.62E-270 | 1.749924919 | 0.909 | 0.363 | 2.13E-265 | 13 ITGB8      |
| 1.50E-239 | 1.727291107 | 0.924 | 0.535 | 4.81E-235 | 13 CTDSPL     |
| 0         | 1.721530905 | 0.737 | 0.014 | 0         | 13 TYRO3      |
| 0         | 1.714510155 | 0.694 | 0.092 | 0         | 13 C1orf21    |
| 0         | 1.694425001 | 0.574 | 0.063 | 0         | 13 XKR4       |
| 0         | 1.687977564 | 0.682 | 0.044 | 0         | 13 CRACD      |
| 7.89E-211 | 1.668579966 | 0.917 | 0.54  | 2.54E-206 | 13 PDLIM5     |
| 0         | 1.658790493 | 0.848 | 0.249 | 0         | 13 KLF7       |
| 2.68E-274 | 1.644434436 | 0.887 | 0.336 | 8.62E-270 | 13 RETREG1    |
| 1.41E-195 | 1.639237101 | 0.953 | 0.616 | 4.52E-191 | 13 KCNQ1OT1   |
| 0         | 1.633212366 | 0.687 | 0.016 | 0         | 13 WT1-AS     |



|           |             |       |       |           |                |
|-----------|-------------|-------|-------|-----------|----------------|
| 1.34E-234 | 1.624195447 | 0.823 | 0.268 | 4.30E-230 | 13 CA10        |
| 0         | 1.609197371 | 0.566 | 0.088 | 0         | 13 HPGD        |
| 3.69E-226 | 1.599147429 | 0.94  | 0.644 | 1.18E-221 | 13 ARHGEF12    |
| 1.94E-214 | 1.569712354 | 0.909 | 0.485 | 6.23E-210 | 13 ZNRF3       |
| 0         | 1.565895138 | 0.676 | 0.057 | 0         | 13 AXDND1      |
| 9.60E-231 | 1.558871195 | 0.95  | 0.636 | 3.08E-226 | 13 EPB4IL5     |
| 0         | 1.554828093 | 0.585 | 0.008 | 0         | 13 NKD1        |
| 5.09E-239 | 1.55434278  | 0.661 | 0.171 | 1.63E-234 | 13 AL365295.1  |
| 3.38E-239 | 1.547545352 | 0.908 | 0.421 | 1.09E-234 | 13 CMAHP       |
| 3.26E-274 | 1.528094405 | 0.882 | 0.318 | 1.05E-269 | 13 ANKRD44     |
| 0         | 1.519744725 | 0.786 | 0.187 | 0         | 13 FIGN        |
| 1.63E-207 | 1.515811313 | 0.919 | 0.484 | 5.22E-203 | 13 COL4A4      |
| 0         | 1.505747887 | 0.754 | 0.154 | 0         | 13 ANXA2       |
| 1.60E-228 | 1.482852267 | 0.901 | 0.415 | 5.13E-224 | 13 MYH9        |
| 3.24E-222 | 1.482451475 | 0.93  | 0.469 | 1.04E-217 | 13 MYO1D       |
| 4.02E-208 | 1.482011066 | 0.895 | 0.496 | 1.29E-203 | 13 TET2        |
| 5.33E-177 | 1.466015255 | 0.895 | 0.566 | 1.71E-172 | 13 NLK         |
| 0         | 1.465741279 | 0.637 | 0.01  | 0         | 13 LMX1B       |
| 6.45E-181 | 1.456424027 | 0.969 | 0.675 | 2.07E-176 | 13 THSD7A      |
| 8.40E-308 | 1.450493153 | 0.768 | 0.194 | 2.70E-303 | 13 PRDM5       |
| 1.00E-188 | 1.448919075 | 0.912 | 0.504 | 3.21E-184 | 13 GMDS        |
| 1.06E-166 | 1.446096223 | 0.977 | 0.703 | 3.39E-162 | 13 DLG2        |
| 3.14E-183 | 1.432699869 | 0.893 | 0.467 | 1.01E-178 | 13 ITGAV       |
| 0         | 1.42882422  | 0.596 | 0.002 | 0         | 13 PTHLH       |
| 4.95E-271 | 1.411894523 | 0.78  | 0.24  | 1.59E-266 | 13 AC244669.2  |
| 7.84E-223 | 1.404800048 | 0.746 | 0.25  | 2.52E-218 | 13 GOLIM4      |
| 2.48E-296 | 1.400926528 | 0.658 | 0.142 | 7.96E-292 | 13 GRK3        |
| 0         | 1.392626663 | 0.682 | 0.061 | 0         | 13 CORO2B      |
| 3.09E-158 | 1.390483098 | 0.656 | 0.228 | 9.93E-154 | 13 C1QTNF7-AS1 |
| 2.28E-166 | 1.371709967 | 0.87  | 0.506 | 7.32E-162 | 13 TANC1       |
| 0         | 1.362537547 | 0.652 | 0.123 | 0         | 13 TMEM150C    |
| 8.87E-158 | 1.359629834 | 0.809 | 0.372 | 2.85E-153 | 13 AC004160.1  |
| 3.85E-176 | 1.357810098 | 0.942 | 0.591 | 1.24E-171 | 13 ADAMTS9     |
| 0         | 1.348214372 | 0.712 | 0.083 | 0         | 13 FRMD1       |
| 9.96E-206 | 1.346891734 | 0.971 | 0.693 | 3.20E-201 | 13 ZSWIM6      |
| 0         | 1.340247295 | 0.652 | 0.052 | 0         | 13 PARD6G      |
| 0         | 1.338918951 | 0.715 | 0.152 | 0         | 13 USP46       |
| 4.01E-186 | 1.338600114 | 0.861 | 0.392 | 1.29E-181 | 13 GULP1       |
| 0         | 1.338313889 | 0.723 | 0.156 | 0         | 13 KLHL42      |
| 1.05E-189 | 1.335343313 | 0.914 | 0.479 | 3.38E-185 | 13 ACTN4       |
| 2.37E-207 | 1.332855403 | 0.906 | 0.391 | 7.62E-203 | 13 CMYA5       |
| 0         | 1.331218498 | 0.515 | 0.018 | 0         | 13 F3          |
| 0         | 1.328444391 | 0.618 | 0.066 | 0         | 13 BTC         |
| 2.11E-197 | 1.32513086  | 0.817 | 0.351 | 6.77E-193 | 13 NOTCH2      |
| 4.83E-211 | 1.322354635 | 0.776 | 0.284 | 1.55E-206 | 13 TUSC3       |
| 8.14E-126 | 1.320509964 | 0.83  | 0.499 | 2.61E-121 | 13 BACH1       |
| 2.94E-225 | 1.315859768 | 0.736 | 0.23  | 9.44E-221 | 13 CEP85L      |
| 2.06E-294 | 1.31565729  | 0.739 | 0.171 | 6.62E-290 | 13 ZFPM2       |
| 4.66E-205 | 1.313166443 | 0.76  | 0.247 | 1.50E-200 | 13 TNIK        |
| 3.20E-208 | 1.310485334 | 0.893 | 0.357 | 1.03E-203 | 13 MYO1B       |
| 3.92E-224 | 1.303545142 | 0.814 | 0.301 | 1.26E-219 | 13 PAK1        |

|           |             |       |       |           |               |
|-----------|-------------|-------|-------|-----------|---------------|
| 3.01E-210 | 1.295814911 | 0.759 | 0.27  | 9.67E-206 | 13 SORT1      |
| 0         | 1.295129415 | 0.587 | 0.048 | 0         | 13 TMC1       |
| 0         | 1.290884179 | 0.582 | 0.032 | 0         | 13 MAP6       |
| 7.53E-232 | 1.290498074 | 0.755 | 0.225 | 2.42E-227 | 13 AC068234.1 |
| 3.74E-187 | 1.282203736 | 0.788 | 0.33  | 1.20E-182 | 13 PARVA      |
| 4.54E-169 | 1.280819147 | 0.872 | 0.495 | 1.46E-164 | 13 MIB1       |
| 2.69E-164 | 1.27793479  | 0.945 | 0.658 | 8.63E-160 | 13 PTPN13     |
| 0         | 1.277861326 | 0.595 | 0.021 | 0         | 13 TNNT2      |
| 1.21E-189 | 1.277292946 | 0.891 | 0.493 | 3.89E-185 | 13 NBPFL4     |
| 8.84E-170 | 1.274955038 | 0.656 | 0.22  | 2.84E-165 | 13 LNC-LBCS   |
| 0         | 1.263996379 | 0.501 | 0.037 | 0         | 13 SNCA       |
| 0         | 1.259798729 | 0.632 | 0.116 | 0         | 13 AC109583.1 |
| 9.74E-186 | 1.259274523 | 0.982 | 0.616 | 3.13E-181 | 13 PRKG1      |
| 5.15E-294 | 1.252973178 | 0.556 | 0.094 | 1.65E-289 | 13 LHFPL6     |
| 0         | 1.252309414 | 0.608 | 0.094 | 0         | 13 ITIH5      |
| 0         | 1.250938748 | 0.582 | 0.03  | 0         | 13 HTRA1      |
| 0         | 1.24994527  | 0.598 | 0.006 | 0         | 13 PPFIA4     |
| 0         | 1.244622326 | 0.684 | 0.145 | 0         | 13 FP700111.1 |
| 0         | 1.227469613 | 0.546 | 0.001 | 0         | 13 AP001021.1 |
| 0         | 1.21598657  | 0.53  | 0.027 | 0         | 13 PRKAR2B    |
| 4.09E-159 | 1.214305633 | 0.84  | 0.447 | 1.31E-154 | 13 AC245297.3 |
| 3.04E-305 | 1.212467805 | 0.695 | 0.152 | 9.76E-301 | 13 ITGA9-AS1  |
| 6.58E-177 | 1.199173025 | 0.76  | 0.304 | 2.11E-172 | 13 SLK        |
| 4.73E-155 | 1.198658699 | 0.906 | 0.52  | 1.52E-150 | 13 FRMD3      |
| 0         | 1.196558399 | 0.493 | 0.025 | 0         | 13 F5         |
| 5.43E-129 | 1.179904149 | 0.677 | 0.282 | 1.75E-124 | 13 DMD        |
| 1.18E-192 | 1.176035252 | 0.723 | 0.232 | 3.80E-188 | 13 JAZF1      |
| 0         | 1.174320423 | 0.601 | 0.045 | 0         | 13 AL590560.2 |
| 0         | 1.172093503 | 0.639 | 0.089 | 0         | 13 SYNJ2      |
| 3.26E-147 | 1.17125367  | 0.898 | 0.61  | 1.05E-142 | 13 RBMS1      |
| 4.52E-126 | 1.167796086 | 0.768 | 0.38  | 1.45E-121 | 13 AL589935.1 |
| 3.87E-184 | 1.164172064 | 0.84  | 0.354 | 1.24E-179 | 13 CAPN2      |
| 2.90E-236 | 1.157585552 | 0.828 | 0.245 | 9.32E-232 | 13 PSD3       |
| 1.53E-306 | 1.155723067 | 0.679 | 0.147 | 4.92E-302 | 13 AC245297.1 |
| 0         | 1.152959901 | 0.475 | 0.004 | 0         | 13 SERPINI2   |
| 0         | 1.149783981 | 0.455 | 0.026 | 0         | 13 MAP1B      |
| 1.29E-136 | 1.149575693 | 0.882 | 0.519 | 4.15E-132 | 13 PTPN14     |
| 8.68E-122 | 1.146865556 | 0.883 | 0.523 | 2.79E-117 | 13 MAML3      |
| 9.94E-136 | 1.143270411 | 0.836 | 0.453 | 3.19E-131 | 13 TOM1L2     |
| 6.69E-134 | 1.142484656 | 0.822 | 0.419 | 2.15E-129 | 13 CC2D2A     |
| 8.11E-132 | 1.138547889 | 0.712 | 0.309 | 2.61E-127 | 13 GTDC1      |
| 1.11E-198 | 1.137797954 | 0.797 | 0.266 | 3.57E-194 | 13 CTTNBP2    |
| 3.60E-279 | 1.135985436 | 0.386 | 0.048 | 1.16E-274 | 13 ADAM28     |
| 1.05E-300 | 1.135335646 | 0.596 | 0.105 | 3.38E-296 | 13 ITGB3      |
| 7.69E-145 | 1.133394573 | 0.75  | 0.348 | 2.47E-140 | 13 WASL       |
| 2.85E-194 | 1.127847908 | 0.697 | 0.211 | 9.14E-190 | 13 TLE4       |
| 7.92E-173 | 1.12348212  | 0.984 | 0.835 | 2.54E-168 | 13 PARD3      |
| 7.79E-267 | 1.12173421  | 0.572 | 0.111 | 2.50E-262 | 13 APBA1      |
| 2.21E-174 | 1.116456141 | 0.76  | 0.277 | 7.09E-170 | 13 DHRS3      |
| 3.55E-289 | 1.115633207 | 0.606 | 0.121 | 1.14E-284 | 13 LRP2BP     |
| 6.23E-170 | 1.11297813  | 0.447 | 0.098 | 2.00E-165 | 13 CNTN1      |

|           |             |       |       |           |                  |
|-----------|-------------|-------|-------|-----------|------------------|
| 1.76E-212 | 1.108421293 | 0.677 | 0.184 | 5.66E-208 | 13 TSC22D3       |
| 3.25E-124 | 1.10412211  | 0.825 | 0.43  | 1.04E-119 | 13 RASSF8        |
| 8.19E-308 | 1.103725563 | 0.747 | 0.17  | 2.63E-303 | 13 ROBO1         |
| 1.61E-185 | 1.103240704 | 0.619 | 0.176 | 5.17E-181 | 13 LEPR          |
| 1.81E-121 | 1.103130262 | 0.817 | 0.41  | 5.82E-117 | 13 GHR           |
| 4.59E-155 | 1.098627826 | 0.797 | 0.326 | 1.48E-150 | 13 AL139807.1    |
| 1.33E-249 | 1.095784797 | 0.616 | 0.138 | 4.26E-245 | 13 TMCC3         |
| 0         | 1.090026046 | 0.52  | 0.023 | 0         | 13 SPOCK2        |
| 0         | 1.089996818 | 0.536 | 0.069 | 0         | 13 CDC42EP3      |
| 2.80E-240 | 1.086782242 | 0.592 | 0.137 | 9.00E-236 | 13 TMEM266       |
| 0         | 1.086094165 | 0.533 | 0.025 | 0         | 13 PDLIM2        |
| 4.28E-195 | 1.082370208 | 0.559 | 0.138 | 1.37E-190 | 13 FAM81A        |
| 1.34E-189 | 1.079436802 | 0.408 | 0.077 | 4.30E-185 | 13 AC009975.1    |
| 0         | 1.079052505 | 0.546 | 0.085 | 0         | 13 STON1-GTF2A11 |
| 9.19E-143 | 1.061620232 | 0.386 | 0.087 | 2.95E-138 | 13 AC018742.1    |
| 5.08E-128 | 1.056081101 | 0.822 | 0.403 | 1.63E-123 | 13 ZNF124        |
| 4.08E-132 | 1.055018245 | 0.947 | 0.695 | 1.31E-127 | 13 APBB2         |
| 8.32E-138 | 1.054822796 | 0.883 | 0.498 | 2.67E-133 | 13 PHACTR4       |
| 0         | 1.052702681 | 0.536 | 0.071 | 0         | 13 SBSPON        |
| 3.62E-145 | 1.046305992 | 0.806 | 0.401 | 1.16E-140 | 13 NBPF26        |
| 0         | 1.046031233 | 0.54  | 0.042 | 0         | 13 NLRP1         |
| 0         | 1.043649161 | 0.53  | 0.039 | 0         | 13 IGFBP2        |
| 3.76E-135 | 1.041208204 | 0.825 | 0.451 | 1.21E-130 | 13 NBPF19        |
| 5.06E-113 | 1.027809776 | 0.806 | 0.432 | 1.62E-108 | 13 SEPTIN11      |
| 7.27E-256 | 1.024214365 | 0.546 | 0.104 | 2.33E-251 | 13 SMAD6         |
| 1.83E-206 | 1.021029754 | 0.681 | 0.194 | 5.86E-202 | 13 ITGA9         |
| 1.10E-161 | 1.017209158 | 0.656 | 0.223 | 3.52E-157 | 13 MFSD6         |
| 0         | 1.01602359  | 0.579 | 0.072 | 0         | 13 INF2          |
| 0         | 1.01116836  | 0.428 | 0.015 | 0         | 13 HS3ST3A1      |
| 0         | 1.009806899 | 0.548 | 0.089 | 0         | 13 IQSEC2        |
| 3.14E-177 | 1.00406587  | 0.669 | 0.203 | 1.01E-172 | 13 BCAM          |
| 0         | 0.997669496 | 0.433 | 0.009 | 0         | 13 ADORA1        |
| 5.99E-122 | 0.99642044  | 0.869 | 0.461 | 1.92E-117 | 13 SSBP2         |
| 3.09E-23  | 0.995027414 | 0.313 | 0.177 | 9.93E-19  | 13 FOS           |
| 5.70E-268 | 0.992353442 | 0.538 | 0.094 | 1.83E-263 | 13 ZNF521        |
| 0         | 0.9808857   | 0.436 | 0.019 | 0         | 13 DCN           |
| 1.70E-126 | 0.974997935 | 0.849 | 0.437 | 5.47E-122 | 13 FAT1          |
| 6.65E-174 | 0.969167048 | 0.575 | 0.162 | 2.13E-169 | 13 TTC33         |
| 0         | 0.967853928 | 0.517 | 0.055 | 0         | 13 TRAM2         |
| 2.48E-117 | 0.965369654 | 0.947 | 0.718 | 7.97E-113 | 13 KANK1         |
| 7.09E-128 | 0.960146999 | 0.75  | 0.321 | 2.28E-123 | 13 MCC           |
| 4.15E-121 | 0.959334219 | 0.848 | 0.442 | 1.33E-116 | 13 PALLD         |
| 4.47E-189 | 0.958664515 | 0.65  | 0.18  | 1.44E-184 | 13 PHF21B        |
| 7.32E-248 | 0.949674304 | 0.535 | 0.102 | 2.35E-243 | 13 TBXAS1        |
| 0         | 0.94497125  | 0.465 | 0.051 | 0         | 13 SPATA18       |
| 0         | 0.93623375  | 0.423 | 0.024 | 0         | 13 CDKN1C        |
| 0         | 0.935794011 | 0.528 | 0.07  | 0         | 13 ILDR2         |
| 8.53E-149 | 0.935149014 | 0.674 | 0.233 | 2.74E-144 | 13 NPR3          |
| 2.69E-207 | 0.930103314 | 0.564 | 0.128 | 8.63E-203 | 13 NXN           |
| 0         | 0.921069736 | 0.517 | 0.067 | 0         | 13 ARHGAP19-SLIT |
| 0         | 0.91232691  | 0.444 | 0.009 | 0         | 13 NES           |

|           |             |       |       |           |                 |
|-----------|-------------|-------|-------|-----------|-----------------|
| 1.54E-137 | 0.897967555 | 0.579 | 0.195 | 4.94E-133 | 13 LNX2         |
| 1.04E-126 | 0.894020829 | 0.917 | 0.597 | 3.33E-122 | 13 UTRN         |
| 0         | 0.889300049 | 0.379 | 0.021 | 0         | 13 ARHGEF26-AS1 |
| 6.91E-126 | 0.885807364 | 0.778 | 0.33  | 2.22E-121 | 13 C9           |
| 1.06E-133 | 0.885199324 | 0.708 | 0.259 | 3.41E-129 | 13 SLC7A8       |
| 2.08E-120 | 0.883985786 | 0.943 | 0.629 | 6.67E-116 | 13 AKT3         |
| 0         | 0.88326509  | 0.433 | 0.017 | 0         | 13 PHYHIP       |
| 1.59E-96  | 0.882508966 | 0.891 | 0.635 | 5.09E-92  | 13 QKI          |
| 5.47E-136 | 0.878740822 | 0.739 | 0.289 | 1.76E-131 | 13 PLEKHH2      |
| 1.59E-72  | 0.869740093 | 0.47  | 0.193 | 5.11E-68  | 13 CTNNA3       |
| 0         | 0.867459059 | 0.464 | 0.04  | 0         | 13 SYNPO        |
| 9.08E-224 | 0.867232362 | 0.603 | 0.137 | 2.92E-219 | 13 TNS2         |
| 3.45E-249 | 0.858837401 | 0.48  | 0.082 | 1.11E-244 | 13 TRIB2        |
| 1.44E-82  | 0.850432177 | 0.729 | 0.426 | 4.64E-78  | 13 ABI1         |
| 4.83E-285 | 0.848401019 | 0.429 | 0.057 | 1.55E-280 | 13 KCND3        |
| 1.01E-136 | 0.846288159 | 0.681 | 0.252 | 3.24E-132 | 13 DCBLD2       |
| 3.50E-93  | 0.845916182 | 0.729 | 0.381 | 1.12E-88  | 13 ZFYVE9       |
| 3.83E-164 | 0.839878655 | 0.634 | 0.188 | 1.23E-159 | 13 ITGA3        |
| 4.23E-234 | 0.839250784 | 0.509 | 0.098 | 1.36E-229 | 13 FAM126A      |
| 1.67E-112 | 0.838820683 | 0.841 | 0.409 | 5.36E-108 | 13 COL4A5       |
| 0         | 0.838674687 | 0.429 | 0.033 | 0         | 13 TMOD1        |
| 1.72E-160 | 0.837419373 | 0.509 | 0.132 | 5.51E-156 | 13 SH3BGR2      |
| 4.10E-236 | 0.836888253 | 0.365 | 0.05  | 1.32E-231 | 13 CITED2       |
| 5.87E-78  | 0.836848325 | 0.781 | 0.465 | 1.89E-73  | 13 SCFD2        |
| 6.78E-145 | 0.832827944 | 0.7   | 0.259 | 2.18E-140 | 13 NBP10        |
| 2.01E-145 | 0.831802354 | 0.58  | 0.182 | 6.47E-141 | 13 TET3         |
| 1.82E-77  | 0.831180255 | 0.835 | 0.55  | 5.84E-73  | 13 PCMTD1       |
| 1.76E-124 | 0.828736964 | 0.639 | 0.227 | 5.66E-120 | 13 ANKS1B       |
| 8.96E-136 | 0.828006591 | 0.692 | 0.271 | 2.88E-131 | 13 NAPEPLD      |
| 8.46E-230 | 0.825661939 | 0.483 | 0.087 | 2.72E-225 | 13 MAP3K20      |
| 2.42E-111 | 0.823628334 | 0.736 | 0.348 | 7.76E-107 | 13 PRKCI        |
| 1.75E-158 | 0.822654743 | 0.724 | 0.252 | 5.61E-154 | 13 PLEKHG1      |
| 0         | 0.822257295 | 0.36  | 0.001 | 0         | 13 LINC01661    |
| 3.02E-88  | 0.821057038 | 0.806 | 0.485 | 9.70E-84  | 13 CLEC16A      |
| 0         | 0.82089381  | 0.412 | 0.003 | 0         | 13 AC023154.1   |
| 1.67E-147 | 0.819738102 | 0.571 | 0.17  | 5.35E-143 | 13 SULF2        |
| 0         | 0.818446408 | 0.391 | 0.033 | 0         | 13 FLRT2        |
| 1.75E-75  | 0.816075274 | 0.812 | 0.476 | 5.63E-71  | 13 FMNL2        |
| 6.78E-67  | 0.81526932  | 0.715 | 0.416 | 2.18E-62  | 13 ITM2B        |
| 0         | 0.813815414 | 0.37  | 0.033 | 0         | 13 NALCN        |
| 0         | 0.812158455 | 0.297 | 0.002 | 0         | 13 DDN          |
| 6.85E-189 | 0.812123933 | 0.533 | 0.121 | 2.20E-184 | 13 SPSB1        |
| 3.01E-91  | 0.812046948 | 0.686 | 0.338 | 9.66E-87  | 13 TMOD3        |
| 6.73E-78  | 0.809095611 | 0.614 | 0.277 | 2.16E-73  | 13 AL359232.1   |
| 5.03E-41  | 0.807436677 | 0.535 | 0.283 | 1.62E-36  | 13 AC007319.1   |
| 0         | 0.807075613 | 0.444 | 0.051 | 0         | 13 VIM          |
| 0         | 0.806263314 | 0.464 | 0.019 | 0         | 13 PDGFRB       |
| 6.65E-262 | 0.80433572  | 0.502 | 0.085 | 2.14E-257 | 13 ARRB1        |
| 6.25E-108 | 0.804214857 | 0.682 | 0.284 | 2.01E-103 | 13 LINC01090    |
| 1.53E-84  | 0.799252769 | 0.765 | 0.433 | 4.90E-80  | 13 KIF13A       |
| 3.82E-177 | 0.798945141 | 0.562 | 0.143 | 1.23E-172 | 13 MCTP2        |

|           |             |       |       |           |                 |
|-----------|-------------|-------|-------|-----------|-----------------|
| 3.78E-79  | 0.795599102 | 0.901 | 0.632 | 1.21E-74  | 13 TNS3         |
| 1.63E-135 | 0.795584263 | 0.642 | 0.22  | 5.24E-131 | 13 ZBTB46       |
| 3.02E-104 | 0.795393717 | 0.982 | 0.874 | 9.70E-100 | 13 AL136164.2   |
| 1.01E-136 | 0.795372623 | 0.587 | 0.198 | 3.26E-132 | 13 CD47         |
| 1.12E-162 | 0.793157895 | 0.556 | 0.15  | 3.61E-158 | 13 TMEM241      |
| 1.16E-167 | 0.790286802 | 0.588 | 0.16  | 3.71E-163 | 13 TMEM178A     |
| 9.77E-83  | 0.789188098 | 0.504 | 0.205 | 3.14E-78  | 13 CDS1         |
| 0         | 0.786458747 | 0.284 | 0.006 | 0         | 13 CHI3L1       |
| 8.58E-87  | 0.786220756 | 0.814 | 0.467 | 2.75E-82  | 13 FCHSD2       |
| 6.07E-86  | 0.784596957 | 0.848 | 0.532 | 1.95E-81  | 13 ZNF609       |
| 0         | 0.783768848 | 0.292 | 0.001 | 0         | 13 LINC01312    |
| 4.58E-247 | 0.783364315 | 0.444 | 0.072 | 1.47E-242 | 13 DNAH9        |
| 3.36E-93  | 0.783266404 | 0.741 | 0.39  | 1.08E-88  | 13 REPS1        |
| 5.69E-126 | 0.780184394 | 0.629 | 0.22  | 1.83E-121 | 13 MDFIC        |
| 4.33E-162 | 0.779419485 | 0.575 | 0.16  | 1.39E-157 | 13 STON1        |
| 7.86E-91  | 0.777298993 | 0.533 | 0.203 | 2.52E-86  | 13 ERC2         |
| 0         | 0.775521673 | 0.438 | 0.02  | 0         | 13 SLC45A1      |
| 2.73E-71  | 0.774818953 | 0.796 | 0.514 | 8.78E-67  | 13 CSPP1        |
| 1.12E-92  | 0.774695856 | 0.789 | 0.439 | 3.59E-88  | 13 BCL2L2-PABPN |
| 0         | 0.768466163 | 0.387 | 0.018 | 0         | 13 HS3ST3B1     |
| 2.89E-192 | 0.767998609 | 0.455 | 0.09  | 9.27E-188 | 13 DPYSL2       |
| 0         | 0.767683897 | 0.434 | 0.041 | 0         | 13 SPTB         |
| 4.53E-110 | 0.766971771 | 0.564 | 0.207 | 1.46E-105 | 13 DPY19L3      |
| 2.10E-85  | 0.762830497 | 0.627 | 0.282 | 6.73E-81  | 13 ZSWIM5       |
| 0         | 0.761543216 | 0.395 | 0.015 | 0         | 13 FAM89A       |
| 3.94E-225 | 0.758809727 | 0.418 | 0.067 | 1.26E-220 | 13 MXRA8        |
| 2.46E-162 | 0.758637971 | 0.442 | 0.098 | 7.90E-158 | 13 CHD3         |
| 2.71E-101 | 0.758080036 | 0.689 | 0.295 | 8.70E-97  | 13 ZNF462       |
| 0         | 0.75457913  | 0.426 | 0.042 | 0         | 13 PHACTR3      |
| 1.37E-101 | 0.751147018 | 0.752 | 0.359 | 4.39E-97  | 13 FNBP1        |
| 0         | 0.748992104 | 0.379 | 0.022 | 0         | 13 GPSM1        |
| 2.96E-97  | 0.748428966 | 0.575 | 0.224 | 9.52E-93  | 13 ATP8B1       |
| 3.87E-91  | 0.748169218 | 0.898 | 0.589 | 1.24E-86  | 13 EML4         |
| 2.60E-87  | 0.747995643 | 0.718 | 0.369 | 8.34E-83  | 13 HMGN3        |
| 2.63E-114 | 0.746958658 | 0.382 | 0.099 | 8.45E-110 | 13 CPNE4        |
| 1.06E-122 | 0.746353312 | 0.598 | 0.212 | 3.39E-118 | 13 PAPSS1       |
| 4.10E-66  | 0.739125364 | 0.814 | 0.548 | 1.32E-61  | 13 ADD3         |
| 0         | 0.739014829 | 0.34  | 0.01  | 0         | 13 JAKMIP2      |
| 2.83E-32  | 0.738312118 | 0.89  | 0.713 | 9.10E-28  | 13 ADAMTS9-AS2  |
| 3.41E-93  | 0.735879787 | 0.574 | 0.23  | 1.09E-88  | 13 EVL          |
| 9.99E-77  | 0.734379621 | 0.906 | 0.697 | 3.21E-72  | 13 PAN3         |
| 8.44E-96  | 0.733817526 | 0.775 | 0.408 | 2.71E-91  | 13 PLCG2        |
| 3.70E-188 | 0.731907878 | 0.4   | 0.073 | 1.19E-183 | 13 FLRT3        |
| 0         | 0.731125387 | 0.468 | 0.051 | 0         | 13 LIMS2        |
| 8.50E-243 | 0.728561174 | 0.327 | 0.039 | 2.73E-238 | 13 JPH1         |
| 2.70E-89  | 0.727146963 | 0.76  | 0.388 | 8.67E-85  | 13 HSPA12A      |
| 6.55E-65  | 0.725818842 | 0.78  | 0.491 | 2.10E-60  | 13 PAWR         |
| 3.20E-165 | 0.725609619 | 0.585 | 0.154 | 1.03E-160 | 13 ZEB2         |
| 2.63E-73  | 0.723509552 | 0.669 | 0.346 | 8.45E-69  | 13 ATP10D       |
| 0         | 0.715095014 | 0.342 | 0.028 | 0         | 13 TSHZ3        |
| 5.67E-91  | 0.714582516 | 0.596 | 0.26  | 1.82E-86  | 13 LEPROT       |

|           |             |       |       |           |               |
|-----------|-------------|-------|-------|-----------|---------------|
| 0         | 0.712010515 | 0.316 | 0.022 | 0         | 13 AC139491.7 |
| 5.33E-87  | 0.711069347 | 0.943 | 0.774 | 1.71E-82  | 13 FNDC3B     |
| 0         | 0.710243435 | 0.347 | 0.026 | 0         | 13 RAET1E-AS1 |
| 1.73E-116 | 0.707749649 | 0.532 | 0.166 | 5.56E-112 | 13 DTNA       |
| 1.40E-196 | 0.706809821 | 0.426 | 0.081 | 4.49E-192 | 13 ARV1       |
| 5.37E-69  | 0.705801148 | 0.874 | 0.663 | 1.72E-64  | 13 ERBIN      |
| 8.68E-83  | 0.702739363 | 0.689 | 0.338 | 2.79E-78  | 13 ITGA1      |
| 3.54E-258 | 0.701263779 | 0.384 | 0.05  | 1.14E-253 | 13 IL1RAP     |
| 0         | 0.699010625 | 0.344 | 0.005 | 0         | 13 PDYN-AS1   |
| 7.30E-203 | 0.696466052 | 0.452 | 0.084 | 2.34E-198 | 13 TTLL7      |
| 1.09E-163 | 0.696049598 | 0.374 | 0.073 | 3.49E-159 | 13 LCA5       |
| 3.89E-98  | 0.690895466 | 0.69  | 0.306 | 1.25E-93  | 13 SLC25A37   |
| 0         | 0.690136922 | 0.368 | 0.031 | 0         | 13 MYL9       |
| 7.16E-300 | 0.689416154 | 0.347 | 0.035 | 2.30E-295 | 13 CEACAM19   |
| 1.37E-135 | 0.689032    | 0.522 | 0.158 | 4.39E-131 | 13 EIF3M      |
| 0         | 0.685597228 | 0.348 | 0.015 | 0         | 13 LINC01031  |
| 0         | 0.684475243 | 0.344 | 0.007 | 0         | 13 MAFB       |
| 7.55E-52  | 0.683934747 | 0.87  | 0.584 | 2.42E-47  | 13 PDE7B      |
| 1.73E-125 | 0.683300683 | 0.334 | 0.071 | 5.57E-121 | 13 LINC02398  |
| 4.96E-177 | 0.681798969 | 0.507 | 0.114 | 1.59E-172 | 13 AFAP1L2    |
| 1.85E-74  | 0.680345379 | 0.765 | 0.422 | 5.95E-70  | 13 CEP112     |
| 1.26E-92  | 0.679841974 | 0.848 | 0.46  | 4.05E-88  | 13 FBXO21     |
| 1.04E-66  | 0.679537643 | 0.849 | 0.559 | 3.34E-62  | 13 PAM        |
| 2.48E-229 | 0.679212106 | 0.378 | 0.054 | 7.96E-225 | 13 AC092757.2 |
| 3.89E-81  | 0.678385907 | 0.53  | 0.215 | 1.25E-76  | 13 TXNRD1     |
| 1.34E-102 | 0.677118674 | 0.583 | 0.224 | 4.31E-98  | 13 GSN        |
| 6.10E-86  | 0.676955552 | 0.489 | 0.183 | 1.96E-81  | 13 STAT1      |
| 2.27E-66  | 0.676430516 | 0.919 | 0.695 | 7.29E-62  | 13 TEAD1      |
| 1.63E-78  | 0.676146324 | 0.517 | 0.205 | 5.23E-74  | 13 TSHZ1      |
| 1.49E-82  | 0.675668908 | 0.726 | 0.367 | 4.79E-78  | 13 BCAR3      |
| 1.94E-49  | 0.675236188 | 0.673 | 0.409 | 6.24E-45  | 13 NEK11      |
| 1.21E-98  | 0.674467484 | 0.626 | 0.251 | 3.87E-94  | 13 TRPC1      |
| 6.68E-67  | 0.674280553 | 0.69  | 0.376 | 2.15E-62  | 13 JAK2       |
| 2.40E-189 | 0.670509404 | 0.361 | 0.057 | 7.71E-185 | 13 LINC01197  |
| 6.20E-106 | 0.666877805 | 0.475 | 0.15  | 1.99E-101 | 13 LPCAT2     |
| 1.02E-49  | 0.663134476 | 0.713 | 0.434 | 3.29E-45  | 13 AF127577.4 |
| 4.89E-60  | 0.662865339 | 0.653 | 0.341 | 1.57E-55  | 13 SLC16A10   |
| 7.10E-71  | 0.661713358 | 0.784 | 0.477 | 2.28E-66  | 13 CAST       |
| 3.31E-66  | 0.660426584 | 0.588 | 0.29  | 1.06E-61  | 13 CCDC6      |
| 9.80E-87  | 0.659629879 | 0.559 | 0.218 | 3.15E-82  | 13 NECTIN2    |
| 6.31E-115 | 0.659079414 | 0.598 | 0.207 | 2.03E-110 | 13 LAMA5      |
| 9.75E-82  | 0.657401559 | 0.553 | 0.218 | 3.13E-77  | 13 AL139383.1 |
| 1.00E-48  | 0.655153046 | 0.968 | 0.88  | 3.21E-44  | 13 WWOX       |
| 5.00E-75  | 0.654306777 | 0.912 | 0.736 | 1.60E-70  | 13 PICALM     |
| 1.15E-62  | 0.652904763 | 0.943 | 0.838 | 3.68E-58  | 13 RABGAP1L   |
| 6.33E-60  | 0.649027682 | 0.58  | 0.293 | 2.03E-55  | 13 CEMIP2     |
| 4.36E-99  | 0.64861561  | 0.574 | 0.221 | 1.40E-94  | 13 RNF145     |
| 0         | 0.642142423 | 0.368 | 0.037 | 0         | 13 BMP7       |
| 7.30E-74  | 0.640291966 | 0.94  | 0.796 | 2.34E-69  | 13 SBF2       |
| 1.57E-106 | 0.639855837 | 0.447 | 0.132 | 5.04E-102 | 13 SLC44A2    |
| 0         | 0.636056312 | 0.384 | 0.03  | 0         | 13 ARHGAP23   |

|           |             |       |       |           |                |
|-----------|-------------|-------|-------|-----------|----------------|
| 5.51E-48  | 0.632514487 | 0.618 | 0.351 | 1.77E-43  | 13 NRIP1       |
| 1.16E-88  | 0.631527781 | 0.502 | 0.187 | 3.73E-84  | 13 FPGT-TNNI3K |
| 9.52E-132 | 0.630382427 | 0.389 | 0.088 | 3.06E-127 | 13 MAP2        |
| 6.00E-57  | 0.629369124 | 0.742 | 0.454 | 1.93E-52  | 13 LINC00894   |
| 5.91E-56  | 0.628599213 | 0.724 | 0.447 | 1.90E-51  | 13 TAF15       |
| 5.54E-169 | 0.62806403  | 0.423 | 0.086 | 1.78E-164 | 13 CHN1        |
| 1.73E-134 | 0.628036209 | 0.459 | 0.121 | 5.57E-130 | 13 TRAF5       |
| 0         | 0.626693101 | 0.272 | 0.008 | 0         | 13 RAMP1       |
| 1.07E-196 | 0.626622452 | 0.408 | 0.074 | 3.43E-192 | 13 MFF-DT      |
| 1.87E-72  | 0.626086403 | 0.959 | 0.827 | 5.99E-68  | 13 MACF1       |
| 1.44E-36  | 0.625274405 | 0.511 | 0.285 | 4.63E-32  | 13 DSTN        |
| 0         | 0.624434858 | 0.386 | 0.035 | 0         | 13 ACSL5       |
| 3.59E-121 | 0.623251131 | 0.334 | 0.074 | 1.15E-116 | 13 LAMA3       |
| 0         | 0.623202037 | 0.379 | 0.037 | 0         | 13 SPARC       |
| 6.71E-81  | 0.621674645 | 0.585 | 0.25  | 2.16E-76  | 13 PCMTD2      |
| 7.24E-59  | 0.621672152 | 0.771 | 0.487 | 2.33E-54  | 13 FERMT2      |
| 2.19E-59  | 0.61952046  | 0.898 | 0.706 | 7.04E-55  | 13 ERC1        |
| 1.08E-147 | 0.619511411 | 0.391 | 0.084 | 3.48E-143 | 13 PARD6G-AS1  |
| 5.09E-77  | 0.618948962 | 0.854 | 0.515 | 1.63E-72  | 13 PTBP3       |
| 5.41E-212 | 0.615785227 | 0.293 | 0.035 | 1.74E-207 | 13 KC6         |
| 3.40E-116 | 0.612982204 | 0.418 | 0.113 | 1.09E-111 | 13 IRAK3       |
| 0         | 0.609627829 | 0.316 | 0.02  | 0         | 13 AC022364.1  |
| 8.07E-47  | 0.607798577 | 0.773 | 0.505 | 2.59E-42  | 13 AUTS2       |
| 9.67E-59  | 0.607729828 | 0.893 | 0.685 | 3.11E-54  | 13 JPX         |
| 5.02E-31  | 0.607504706 | 0.661 | 0.419 | 1.61E-26  | 13 PDK4        |
| 1.99E-152 | 0.606973281 | 0.441 | 0.102 | 6.39E-148 | 13 AC243964.3  |
| 3.99E-70  | 0.605717471 | 0.37  | 0.126 | 1.28E-65  | 13 ATRNL1      |
| 2.55E-175 | 0.604555858 | 0.425 | 0.086 | 8.20E-171 | 13 ARHGEF37    |
| 3.05E-29  | 0.597978217 | 0.412 | 0.224 | 9.78E-25  | 13 RCAN1       |
| 5.79E-82  | 0.595830536 | 0.345 | 0.103 | 1.86E-77  | 13 RGS17       |
| 1.83E-294 | 0.594579717 | 0.321 | 0.031 | 5.88E-290 | 13 LINC01252   |
| 5.35E-68  | 0.593594573 | 0.75  | 0.416 | 1.72E-63  | 13 BICD1       |
| 5.73E-54  | 0.589319035 | 0.501 | 0.23  | 1.84E-49  | 13 SLC2A13     |
| 0         | 0.586129789 | 0.29  | 0.015 | 0         | 13 MYLK3       |
| 1.11E-51  | 0.58388506  | 0.624 | 0.339 | 3.57E-47  | 13 ARAP2       |
| 6.70E-167 | 0.582311473 | 0.395 | 0.077 | 2.15E-162 | 13 DUBR        |
| 3.00E-53  | 0.582172085 | 0.661 | 0.378 | 9.65E-49  | 13 MED27       |
| 1.57E-42  | 0.581434229 | 0.434 | 0.209 | 5.03E-38  | 13 C12orf40    |
| 0         | 0.579465118 | 0.301 | 0.006 | 0         | 13 AL049838.1  |
| 1.56E-65  | 0.578035244 | 0.52  | 0.224 | 5.03E-61  | 13 PLOD2       |
| 0         | 0.577808915 | 0.272 | 0.011 | 0         | 13 AL390726.5  |
| 5.87E-92  | 0.576902831 | 0.843 | 0.446 | 1.89E-87  | 13 DOCK4       |
| 7.23E-243 | 0.576071591 | 0.31  | 0.034 | 2.32E-238 | 13 TPM2        |
| 2.46E-72  | 0.573658091 | 0.392 | 0.135 | 7.91E-68  | 13 AC093865.1  |
| 3.92E-75  | 0.573553382 | 0.502 | 0.2   | 1.26E-70  | 13 ARL13B      |
| 1.41E-91  | 0.572871871 | 0.357 | 0.101 | 4.52E-87  | 13 L3MBTL3     |
| 5.04E-57  | 0.569834325 | 0.695 | 0.388 | 1.62E-52  | 13 CAMSAP2     |
| 6.60E-65  | 0.569396338 | 0.77  | 0.448 | 2.12E-60  | 13 SENP7       |
| 3.46E-123 | 0.568351677 | 0.373 | 0.092 | 1.11E-118 | 13 DANCR       |
| 3.82E-118 | 0.568068763 | 0.378 | 0.09  | 1.23E-113 | 13 KCNT2       |
| 3.63E-117 | 0.567739648 | 0.436 | 0.122 | 1.17E-112 | 13 HPS5        |

|           |             |       |       |           |               |
|-----------|-------------|-------|-------|-----------|---------------|
| 5.98E-51  | 0.56726713  | 0.799 | 0.518 | 1.92E-46  | 13 EFCAB13    |
| 2.11E-78  | 0.566800093 | 0.707 | 0.334 | 6.77E-74  | 13 CASZ1      |
| 0         | 0.566754055 | 0.251 | 0.002 | 0         | 13 LINC02174  |
| 2.11E-157 | 0.566353778 | 0.342 | 0.063 | 6.78E-153 | 13 IL17RD     |
| 5.27E-78  | 0.56299233  | 1     | 0.962 | 1.69E-73  | 13 NEAT1      |
| 2.70E-58  | 0.56194516  | 0.616 | 0.321 | 8.67E-54  | 13 RAD23B     |
| 1.65E-66  | 0.559896527 | 0.344 | 0.114 | 5.30E-62  | 13 MIR503HG   |
| 1.11E-283 | 0.559044583 | 0.361 | 0.04  | 3.57E-279 | 13 POLA2      |
| 1.55E-59  | 0.557140462 | 0.742 | 0.408 | 4.97E-55  | 13 SPATS2L    |
| 5.84E-136 | 0.555176016 | 0.418 | 0.1   | 1.88E-131 | 13 MTSS2      |
| 1.43E-53  | 0.554752318 | 0.588 | 0.31  | 4.58E-49  | 13 STXBP3     |
| 2.36E-50  | 0.553649661 | 0.673 | 0.404 | 7.57E-46  | 13 APPBP2     |
| 6.13E-44  | 0.552308376 | 0.815 | 0.592 | 1.97E-39  | 13 PHIP       |
| 2.90E-103 | 0.551778268 | 0.444 | 0.136 | 9.31E-99  | 13 CTNBP1     |
| 1.44E-58  | 0.547765983 | 0.624 | 0.323 | 4.64E-54  | 13 PTPN21     |
| 1.42E-57  | 0.546862189 | 0.652 | 0.354 | 4.55E-53  | 13 WDSUB1     |
| 4.37E-55  | 0.546072855 | 0.773 | 0.491 | 1.40E-50  | 13 CCDC18-AS1 |
| 6.25E-87  | 0.544249639 | 0.668 | 0.294 | 2.01E-82  | 13 WASHC1     |
| 1.58E-85  | 0.54301443  | 0.558 | 0.213 | 5.06E-81  | 13 ST3GAL1    |
| 1.11E-95  | 0.542410176 | 0.361 | 0.101 | 3.55E-91  | 13 FAM114A1   |
| 1.71E-41  | 0.541242147 | 0.334 | 0.143 | 5.51E-37  | 13 PPA1       |
| 2.91E-82  | 0.54045406  | 0.671 | 0.291 | 9.36E-78  | 13 BNIP3L     |
| 1.61E-125 | 0.540173072 | 0.391 | 0.095 | 5.17E-121 | 13 STN1       |
| 2.36E-110 | 0.539825123 | 0.417 | 0.117 | 7.59E-106 | 13 LGALS8     |
| 7.84E-126 | 0.539795304 | 0.334 | 0.071 | 2.52E-121 | 13 ME1        |
| 3.03E-119 | 0.539385252 | 0.378 | 0.089 | 9.73E-115 | 13 XYLT1      |
| 2.86E-204 | 0.53903839  | 0.386 | 0.061 | 9.17E-200 | 13 MICAL2     |
| 1.27E-50  | 0.537888033 | 0.728 | 0.437 | 4.07E-46  | 13 CHD7       |
| 0         | 0.537462112 | 0.29  | 0.009 | 0         | 13 AC025809.1 |
| 0         | 0.535692806 | 0.267 | 0.019 | 0         | 13 CCNYL2     |
| 1.58E-135 | 0.535504122 | 0.457 | 0.115 | 5.09E-131 | 13 SLC6A6     |
| 1.03E-125 | 0.535395753 | 0.353 | 0.079 | 3.32E-121 | 13 METTL24    |
| 7.23E-72  | 0.532974021 | 0.541 | 0.233 | 2.32E-67  | 13 HNRNPLL    |
| 1.55E-78  | 0.528500451 | 0.558 | 0.224 | 4.99E-74  | 13 RASSF8-AS1 |
| 4.26E-52  | 0.526898845 | 0.694 | 0.42  | 1.37E-47  | 13 WDR26      |
| 2.53E-160 | 0.526814136 | 0.292 | 0.046 | 8.13E-156 | 13 OLMALINC   |
| 1.04E-43  | 0.526496923 | 0.496 | 0.253 | 3.34E-39  | 13 SEM1       |
| 3.45E-55  | 0.526123694 | 0.895 | 0.649 | 1.11E-50  | 13 SH3RF1     |
| 1.29E-123 | 0.524562349 | 0.426 | 0.111 | 4.14E-119 | 13 ZNF496     |
| 8.07E-45  | 0.523042749 | 0.937 | 0.767 | 2.59E-40  | 13 IGF1R      |
| 1.70E-46  | 0.522884217 | 0.788 | 0.528 | 5.47E-42  | 13 VGLL4      |
| 1.17E-240 | 0.520502888 | 0.303 | 0.034 | 3.77E-236 | 13 GSTCD      |
| 1.59E-86  | 0.520389238 | 0.462 | 0.158 | 5.11E-82  | 13 SYT9       |
| 2.35E-92  | 0.518416941 | 0.562 | 0.211 | 7.56E-88  | 13 NBP20      |
| 1.24E-65  | 0.517264696 | 0.558 | 0.252 | 3.99E-61  | 13 AC073283.3 |
| 3.73E-226 | 0.5168937   | 0.272 | 0.028 | 1.20E-221 | 13 AC064875.1 |
| 1.24E-46  | 0.516782833 | 0.697 | 0.413 | 3.99E-42  | 13 TRAPPC10   |
| 2.52E-120 | 0.515176895 | 0.381 | 0.092 | 8.10E-116 | 13 TMSB4X     |
| 2.62E-74  | 0.515122005 | 0.718 | 0.345 | 8.42E-70  | 13 AASS       |
| 1.13E-59  | 0.515018445 | 0.606 | 0.313 | 3.65E-55  | 13 CAND1      |
| 7.28E-80  | 0.513958962 | 0.59  | 0.235 | 2.34E-75  | 13 PPP2R2B    |



|           |             |       |       |           |               |
|-----------|-------------|-------|-------|-----------|---------------|
| 2.72E-47  | 0.511181144 | 0.614 | 0.328 | 8.73E-43  | 13 CECR2      |
| 4.70E-40  | 0.510222141 | 0.707 | 0.436 | 1.51E-35  | 13 RHBDD1     |
| 1.25E-60  | 0.510180943 | 0.566 | 0.269 | 4.02E-56  | 13 ZBTB1      |
| 2.46E-53  | 0.50991105  | 0.583 | 0.296 | 7.90E-49  | 13 ZNRF2P2    |
| 3.03E-88  | 0.508099956 | 0.387 | 0.12  | 9.73E-84  | 13 NUDCD1     |
| 4.43E-68  | 0.507340519 | 0.545 | 0.244 | 1.42E-63  | 13 AC244669.1 |
| 1.62E-49  | 0.505531784 | 0.712 | 0.427 | 5.19E-45  | 13 ZNF280D    |
| 5.65E-51  | 0.504595583 | 0.78  | 0.478 | 1.81E-46  | 13 RAI14      |
| 1.90E-73  | 0.504001096 | 0.46  | 0.177 | 6.11E-69  | 13 HMGN1      |
| 3.18E-147 | 0.502654018 | 0.342 | 0.065 | 1.02E-142 | 13 PMEPA1     |
| 2.27E-45  | 0.501615256 | 0.765 | 0.515 | 7.29E-41  | 13 ROCK1      |
| 8.26E-193 | 0.500595564 | 0.292 | 0.038 | 2.65E-188 | 13 H2AJ       |
| 1.69E-65  | 0.499427192 | 0.786 | 0.433 | 5.41E-61  | 13 SASH1      |
| 1.13E-75  | 0.498893727 | 0.535 | 0.217 | 3.63E-71  | 13 EFHC1      |
| 2.91E-40  | 0.498711046 | 0.567 | 0.309 | 9.34E-36  | 13 AC087564.1 |
| 8.28E-84  | 0.498620629 | 0.515 | 0.189 | 2.66E-79  | 13 SDC2       |
| 0         | 0.49852765  | 0.261 | 0.006 | 0         | 13 PTGER4     |
| 5.84E-43  | 0.498470181 | 0.689 | 0.427 | 1.87E-38  | 13 VEZT       |
| 5.19E-52  | 0.497084157 | 0.575 | 0.285 | 1.67E-47  | 13 AHNAK      |
| 4.58E-41  | 0.496070825 | 0.647 | 0.384 | 1.47E-36  | 13 UBAP2      |
| 3.98E-67  | 0.494535453 | 0.515 | 0.218 | 1.28E-62  | 13 LRRC1      |
| 1.82E-55  | 0.493652498 | 0.716 | 0.406 | 5.86E-51  | 13 SPTAN1     |
| 1.09E-186 | 0.492967518 | 0.332 | 0.051 | 3.50E-182 | 13 WTAPP1     |
| 6.69E-62  | 0.491619159 | 0.582 | 0.276 | 2.15E-57  | 13 FANCL      |
| 2.41E-250 | 0.491418628 | 0.308 | 0.033 | 7.74E-246 | 13 SIRPA      |
| 4.56E-44  | 0.486684521 | 0.763 | 0.502 | 1.47E-39  | 13 EPC1       |
| 1.86E-34  | 0.486327373 | 0.878 | 0.674 | 5.98E-30  | 13 ARHGAP24   |
| 4.09E-54  | 0.482185246 | 0.629 | 0.322 | 1.31E-49  | 13 NFATC3     |
| 2.66E-62  | 0.481439462 | 0.504 | 0.218 | 8.53E-58  | 13 CDC40      |
| 5.94E-226 | 0.480291986 | 0.303 | 0.035 | 1.91E-221 | 13 GPR173     |
| 2.76E-59  | 0.479035779 | 0.613 | 0.301 | 8.88E-55  | 13 NBPF9      |
| 1.95E-24  | 0.478029781 | 0.69  | 0.501 | 6.25E-20  | 13 RFX3       |
| 3.03E-50  | 0.475791605 | 0.828 | 0.548 | 9.73E-46  | 13 ARHGAP29   |
| 3.21E-61  | 0.475405682 | 0.506 | 0.219 | 1.03E-56  | 13 AC027097.2 |
| 6.34E-101 | 0.475110927 | 0.436 | 0.133 | 2.03E-96  | 13 TMCO3      |
| 1.49E-28  | 0.473933128 | 0.297 | 0.14  | 4.79E-24  | 13 AC013652.1 |
| 2.30E-66  | 0.473065259 | 0.93  | 0.723 | 7.39E-62  | 13 GLS        |
| 2.02E-127 | 0.472760017 | 0.29  | 0.055 | 6.50E-123 | 13 FAM153A    |
| 8.02E-32  | 0.47232921  | 0.648 | 0.424 | 2.58E-27  | 13 FRS2       |
| 1.85E-55  | 0.471501422 | 0.588 | 0.297 | 5.95E-51  | 13 RFC1       |
| 1.12E-55  | 0.471346948 | 0.507 | 0.233 | 3.59E-51  | 13 NCK2       |
| 9.17E-44  | 0.469077694 | 0.553 | 0.299 | 2.95E-39  | 13 MBD2       |
| 3.17E-43  | 0.467370386 | 0.54  | 0.277 | 1.02E-38  | 13 PCDHGA1    |
| 1.97E-73  | 0.467063573 | 0.306 | 0.089 | 6.33E-69  | 13 FAM184B    |
| 1.48E-49  | 0.466295871 | 0.358 | 0.145 | 4.74E-45  | 13 AC012618.3 |
| 2.74E-57  | 0.465956257 | 0.455 | 0.195 | 8.81E-53  | 13 TSEN15     |
| 7.31E-70  | 0.465874242 | 0.358 | 0.119 | 2.35E-65  | 13 CSRP1      |
| 1.25E-94  | 0.465405986 | 0.35  | 0.095 | 4.02E-90  | 13 CCAR2      |
| 3.32E-60  | 0.464502779 | 0.964 | 0.79  | 1.07E-55  | 13 RBPMS      |
| 8.19E-44  | 0.463199657 | 0.687 | 0.409 | 2.63E-39  | 13 ZNF277     |
| 5.43E-41  | 0.462576835 | 0.814 | 0.575 | 1.74E-36  | 13 WWP1       |

|           |             |       |       |           |               |
|-----------|-------------|-------|-------|-----------|---------------|
| 1.19E-37  | 0.462105812 | 0.511 | 0.275 | 3.83E-33  | 13 TERF2IP    |
| 3.85E-112 | 0.461113315 | 0.295 | 0.062 | 1.24E-107 | 13 TDRD5      |
| 1.04E-74  | 0.459945672 | 0.417 | 0.147 | 3.34E-70  | 13 OGFRL1     |
| 5.09E-42  | 0.459854323 | 0.52  | 0.27  | 1.64E-37  | 13 GAB2       |
| 3.32E-71  | 0.459497584 | 0.512 | 0.199 | 1.07E-66  | 13 SEMA3B     |
| 2.83E-59  | 0.459309412 | 0.514 | 0.222 | 9.09E-55  | 13 SOBP       |
| 8.35E-256 | 0.45787822  | 0.306 | 0.032 | 2.68E-251 | 13 MCM6       |
| 5.48E-182 | 0.456927022 | 0.274 | 0.036 | 1.76E-177 | 13 ZNF185     |
| 2.57E-58  | 0.455813342 | 0.538 | 0.247 | 8.25E-54  | 13 ZNF846     |
| 1.73E-48  | 0.454071998 | 0.781 | 0.504 | 5.55E-44  | 13 ARGLU1     |
| 2.65E-221 | 0.453862354 | 0.323 | 0.041 | 8.50E-217 | 13 PGM5P4     |
| 1.48E-128 | 0.45288785  | 0.306 | 0.06  | 4.75E-124 | 13 PEBP4      |
| 1.24E-32  | 0.451744401 | 0.391 | 0.193 | 3.99E-28  | 13 CENPP      |
| 2.09E-66  | 0.451490282 | 0.525 | 0.22  | 6.71E-62  | 13 AC019257.8 |
| 1.08E-84  | 0.451118411 | 0.348 | 0.101 | 3.46E-80  | 13 NDRG2      |
| 1.34E-38  | 0.447431742 | 0.695 | 0.432 | 4.32E-34  | 13 DPY19L1P1  |
| 1.80E-121 | 0.445740381 | 0.251 | 0.043 | 5.77E-117 | 13 TMOD2      |
| 8.84E-64  | 0.445522985 | 0.559 | 0.246 | 2.84E-59  | 13 NBPF15     |
| 4.44E-55  | 0.444344436 | 0.386 | 0.152 | 1.43E-50  | 13 IKZF2      |
| 2.48E-65  | 0.440326127 | 0.476 | 0.193 | 7.96E-61  | 13 ZC2HC1A    |
| 2.94E-22  | 0.438135422 | 0.695 | 0.51  | 9.43E-18  | 13 BCKDHB     |
| 6.14E-88  | 0.437909037 | 0.276 | 0.066 | 1.97E-83  | 13 SYCP2      |
| 6.75E-85  | 0.43756551  | 0.339 | 0.095 | 2.17E-80  | 13 AC012158.1 |
| 7.03E-150 | 0.43517502  | 0.259 | 0.038 | 2.26E-145 | 13 BMP1       |
| 3.05E-50  | 0.433197    | 0.562 | 0.286 | 9.80E-46  | 13 SLF2       |
| 3.31E-38  | 0.432368057 | 0.877 | 0.693 | 1.06E-33  | 13 CDC42BPA   |
| 2.92E-104 | 0.432355534 | 0.314 | 0.073 | 9.38E-100 | 13 PDE4B      |
| 7.61E-91  | 0.431914296 | 0.337 | 0.091 | 2.44E-86  | 13 TBC1D2B    |
| 3.69E-107 | 0.431103239 | 0.25  | 0.047 | 1.19E-102 | 13 GAS7       |
| 7.21E-43  | 0.430953169 | 0.818 | 0.542 | 2.32E-38  | 13 DAPK1      |
| 2.90E-53  | 0.43007731  | 0.382 | 0.148 | 9.30E-49  | 13 SCN7A      |
| 1.49E-56  | 0.429909099 | 0.522 | 0.24  | 4.78E-52  | 13 AKT2       |
| 1.51E-186 | 0.426175001 | 0.276 | 0.034 | 4.86E-182 | 13 DPYSL3     |
| 6.14E-39  | 0.425953527 | 0.613 | 0.35  | 1.97E-34  | 13 ITGB5      |
| 3.07E-39  | 0.425780726 | 0.634 | 0.372 | 9.85E-35  | 13 USO1       |
| 1.81E-71  | 0.424875586 | 0.514 | 0.201 | 5.80E-67  | 13 DCLK2      |
| 4.55E-99  | 0.424487383 | 0.303 | 0.071 | 1.46E-94  | 13 LINC01588  |
| 7.65E-39  | 0.420994649 | 0.438 | 0.216 | 2.46E-34  | 13 AC006504.5 |
| 2.08E-40  | 0.420744349 | 0.793 | 0.492 | 6.67E-36  | 13 XKR6       |
| 1.02E-136 | 0.420510717 | 0.318 | 0.06  | 3.28E-132 | 13 DAAM2      |
| 1.51E-86  | 0.419845107 | 0.301 | 0.076 | 4.86E-82  | 13 TIMP2      |
| 1.05E-21  | 0.419550733 | 0.721 | 0.523 | 3.38E-17  | 13 UBA6-AS1   |
| 0         | 0.419310314 | 0.272 | 0.019 | 0         | 13 RGS10      |
| 1.13E-106 | 0.418700817 | 0.329 | 0.078 | 3.64E-102 | 13 AL929236.1 |
| 9.22E-58  | 0.418375276 | 0.41  | 0.161 | 2.96E-53  | 13 DGKD       |
| 6.86E-30  | 0.417842767 | 0.548 | 0.323 | 2.20E-25  | 13 MEGF9      |
| 1.14E-35  | 0.416696622 | 0.546 | 0.314 | 3.65E-31  | 13 WDR41      |
| 1.23E-13  | 0.41480354  | 0.321 | 0.2   | 3.94E-09  | 13 LMNA       |
| 2.72E-51  | 0.413962759 | 0.89  | 0.645 | 8.73E-47  | 13 CPEB4      |
| 7.96E-86  | 0.413504106 | 0.955 | 0.514 | 2.56E-81  | 13 PTH1R      |
| 2.09E-44  | 0.413254045 | 0.598 | 0.322 | 6.70E-40  | 13 IP6K2      |

|           |             |       |       |           |               |
|-----------|-------------|-------|-------|-----------|---------------|
| 1.50E-80  | 0.413047143 | 0.282 | 0.073 | 4.81E-76  | 13 MYLIP      |
| 7.20E-78  | 0.412970003 | 0.267 | 0.068 | 2.31E-73  | 13 TMEM64     |
| 6.88E-260 | 0.408693936 | 0.258 | 0.022 | 2.21E-255 | 13 SERPINB9   |
| 1.74E-27  | 0.405087181 | 0.789 | 0.587 | 5.60E-23  | 13 RAPGEF6    |
| 1.89E-35  | 0.402894075 | 0.371 | 0.182 | 6.08E-31  | 13 NKAIN2     |
| 3.63E-37  | 0.402808258 | 0.95  | 0.829 | 1.17E-32  | 13 DDX17      |
| 1.18E-28  | 0.401769202 | 0.665 | 0.443 | 3.80E-24  | 13 STXBP5     |
| 6.14E-42  | 0.400846353 | 0.483 | 0.24  | 1.97E-37  | 13 AP3S1      |
| 3.19E-26  | 0.399613257 | 0.827 | 0.634 | 1.03E-21  | 13 ATXN2      |
| 6.38E-45  | 0.399221641 | 0.46  | 0.214 | 2.05E-40  | 13 PLD1       |
| 4.21E-44  | 0.398621713 | 0.517 | 0.268 | 1.35E-39  | 13 ZNF736     |
| 7.65E-91  | 0.398000909 | 0.258 | 0.058 | 2.46E-86  | 13 AL513318.1 |
| 1.49E-28  | 0.397778024 | 0.755 | 0.531 | 4.78E-24  | 13 DPYD       |
| 2.39E-70  | 0.396841131 | 0.263 | 0.07  | 7.67E-66  | 13 AJ009632.2 |
| 5.47E-42  | 0.396686419 | 0.407 | 0.186 | 1.76E-37  | 13 CCDC122    |
| 1.07E-69  | 0.394640222 | 0.36  | 0.12  | 3.43E-65  | 13 MED21      |
| 4.87E-32  | 0.393303105 | 0.951 | 0.853 | 1.56E-27  | 13 RERE       |
| 3.16E-33  | 0.392744285 | 0.689 | 0.431 | 1.01E-28  | 13 ARHGAP21   |
| 5.09E-32  | 0.392274739 | 0.541 | 0.316 | 1.63E-27  | 13 CEP83      |
| 1.49E-110 | 0.3919345   | 0.261 | 0.05  | 4.80E-106 | 13 PVR        |
| 3.40E-29  | 0.391301671 | 0.739 | 0.511 | 1.09E-24  | 13 ELF1       |
| 3.10E-31  | 0.391064781 | 0.652 | 0.408 | 9.94E-27  | 13 CDK6       |
| 1.56E-30  | 0.390231895 | 0.707 | 0.47  | 5.01E-26  | 13 FAM13B     |
| 8.94E-66  | 0.390168987 | 0.41  | 0.149 | 2.87E-61  | 13 KATNAL1    |
| 5.25E-30  | 0.38977659  | 0.616 | 0.379 | 1.69E-25  | 13 TMEM14B    |
| 1.84E-43  | 0.388825208 | 0.29  | 0.11  | 5.91E-39  | 13 AC073569.2 |
| 6.69E-143 | 0.388799463 | 0.28  | 0.046 | 2.15E-138 | 13 CR1L       |
| 1.39E-47  | 0.388592061 | 0.54  | 0.271 | 4.47E-43  | 13 PON2       |
| 1.08E-127 | 0.388586784 | 0.295 | 0.056 | 3.47E-123 | 13 FAM98A     |
| 1.37E-64  | 0.387024537 | 0.394 | 0.142 | 4.39E-60  | 13 FPGT       |
| 4.33E-46  | 0.385700804 | 0.53  | 0.256 | 1.39E-41  | 13 DOCK3      |
| 4.01E-39  | 0.385648769 | 0.384 | 0.172 | 1.29E-34  | 13 AGRN       |
| 8.26E-44  | 0.382000939 | 0.293 | 0.109 | 2.65E-39  | 13 AC024901.1 |
| 4.68E-98  | 0.380212937 | 0.31  | 0.074 | 1.50E-93  | 13 MDM1       |
| 1.21E-24  | 0.377450938 | 0.509 | 0.311 | 3.87E-20  | 13 FSIP2      |
| 4.73E-42  | 0.37734927  | 0.524 | 0.268 | 1.52E-37  | 13 LINC00472  |
| 8.23E-59  | 0.376860637 | 0.348 | 0.122 | 2.64E-54  | 13 CEP126     |
| 5.57E-33  | 0.374584735 | 0.535 | 0.299 | 1.79E-28  | 13 ANKH       |
| 5.70E-86  | 0.373972488 | 0.337 | 0.094 | 1.83E-81  | 13 ANKRD19P   |
| 8.66E-27  | 0.371546697 | 0.52  | 0.314 | 2.78E-22  | 13 RHEB       |
| 5.72E-33  | 0.371384649 | 0.634 | 0.394 | 1.84E-28  | 13 WASF2      |
| 1.74E-25  | 0.371138605 | 0.937 | 0.798 | 5.60E-21  | 13 SOX6       |
| 6.74E-25  | 0.370868397 | 0.613 | 0.391 | 2.17E-20  | 13 ACTR3      |
| 1.51E-42  | 0.370037512 | 0.261 | 0.093 | 4.83E-38  | 13 MIR3681HG  |
| 8.74E-56  | 0.369832793 | 0.319 | 0.113 | 2.81E-51  | 13 TXNRD2     |
| 1.22E-28  | 0.369722981 | 0.376 | 0.193 | 3.93E-24  | 13 PRANCR     |
| 5.93E-70  | 0.367981935 | 0.308 | 0.092 | 1.90E-65  | 13 LRP11      |
| 2.22E-35  | 0.367275085 | 0.464 | 0.236 | 7.14E-31  | 13 SLC38A2    |
| 2.37E-110 | 0.367214577 | 0.292 | 0.061 | 7.61E-106 | 13 SGCB       |
| 2.65E-60  | 0.367083985 | 0.402 | 0.15  | 8.50E-56  | 13 LIMK2      |
| 7.53E-43  | 0.366102417 | 0.525 | 0.268 | 2.42E-38  | 13 IARS1      |

|          |             |       |       |          |               |
|----------|-------------|-------|-------|----------|---------------|
| 1.12E-26 | 0.364759438 | 0.65  | 0.426 | 3.60E-22 | 13 MCPH1      |
| 0        | 0.364187844 | 0.259 | 0.003 | 0        | 13 AC006355.2 |
| 5.85E-22 | 0.362816204 | 0.865 | 0.693 | 1.88E-17 | 13 NCOA1      |
| 7.71E-48 | 0.3619586   | 0.417 | 0.178 | 2.48E-43 | 13 AL357153.2 |
| 1.09E-36 | 0.36132052  | 0.35  | 0.158 | 3.49E-32 | 13 ABHD3      |
| 3.23E-33 | 0.36097216  | 0.475 | 0.252 | 1.04E-28 | 13 INTS3      |
| 5.75E-53 | 0.36077262  | 0.433 | 0.182 | 1.85E-48 | 13 AC092666.1 |
| 5.10E-41 | 0.358923387 | 0.58  | 0.313 | 1.64E-36 | 13 MBOAT2     |
| 1.02E-41 | 0.358770662 | 0.551 | 0.286 | 3.29E-37 | 13 PRMT2      |
| 3.48E-48 | 0.358461288 | 0.457 | 0.204 | 1.12E-43 | 13 ALDH7A1    |
| 3.06E-43 | 0.357658422 | 0.389 | 0.17  | 9.83E-39 | 13 RSPH3      |
| 2.69E-92 | 0.356623334 | 0.681 | 0.27  | 8.65E-88 | 13 CALD1      |
| 1.57E-64 | 0.356559439 | 0.267 | 0.075 | 5.04E-60 | 13 FGFR4      |
| 1.50E-29 | 0.356360679 | 0.368 | 0.187 | 4.81E-25 | 13 DAG1       |
| 1.02E-28 | 0.356310976 | 0.622 | 0.399 | 3.29E-24 | 13 SEPTIN7    |
| 5.54E-40 | 0.356142974 | 0.593 | 0.325 | 1.78E-35 | 13 WBP1L      |
| 1.71E-45 | 0.35569813  | 0.541 | 0.259 | 5.49E-41 | 13 SCD5       |
| 4.19E-71 | 0.35561391  | 0.334 | 0.102 | 1.35E-66 | 13 JHY        |
| 6.11E-36 | 0.354003562 | 0.506 | 0.27  | 1.96E-31 | 13 RIC3       |
| 1.45E-79 | 0.353974818 | 0.311 | 0.086 | 4.66E-75 | 13 ECT2L      |
| 5.62E-38 | 0.353557522 | 0.968 | 0.918 | 1.81E-33 | 13 FTX        |
| 8.73E-28 | 0.353222325 | 0.723 | 0.489 | 2.80E-23 | 13 ATXN10     |
| 1.53E-36 | 0.353059155 | 0.46  | 0.235 | 4.91E-32 | 13 ENO4       |
| 1.87E-17 | 0.351915104 | 0.635 | 0.449 | 6.01E-13 | 13 ZNF516     |
| 5.61E-26 | 0.349967634 | 0.71  | 0.491 | 1.80E-21 | 13 HIPK3      |
| 6.14E-27 | 0.349702535 | 0.66  | 0.439 | 1.97E-22 | 13 SVIL-AS1   |
| 4.60E-62 | 0.349390478 | 0.353 | 0.122 | 1.48E-57 | 13 ARL3       |
| 4.63E-28 | 0.349359565 | 0.635 | 0.4   | 1.49E-23 | 13 SSBP3      |
| 1.95E-55 | 0.349158688 | 0.512 | 0.222 | 6.25E-51 | 13 TSPAN5     |
| 2.96E-31 | 0.348291202 | 0.465 | 0.248 | 9.52E-27 | 13 DLG5       |
| 2.11E-34 | 0.347767492 | 0.705 | 0.442 | 6.77E-30 | 13 TTC14      |
| 1.71E-35 | 0.347573782 | 0.538 | 0.301 | 5.49E-31 | 13 LENG8      |
| 1.37E-28 | 0.347135692 | 0.614 | 0.383 | 4.39E-24 | 13 FSD1L      |
| 2.58E-46 | 0.346522292 | 0.337 | 0.133 | 8.28E-42 | 13 WDR17      |
| 4.58E-45 | 0.346013636 | 0.426 | 0.196 | 1.47E-40 | 13 KAT7       |
| 7.21E-23 | 0.345194897 | 0.75  | 0.539 | 2.31E-18 | 13 SPAG16     |
| 2.62E-34 | 0.345124952 | 0.661 | 0.397 | 8.41E-30 | 13 STX7       |
| 1.10E-29 | 0.344643467 | 0.652 | 0.421 | 3.54E-25 | 13 PPHLN1     |
| 3.23E-45 | 0.344229808 | 0.415 | 0.185 | 1.04E-40 | 13 KCTD9      |
| 3.13E-58 | 0.342971733 | 0.34  | 0.119 | 1.01E-53 | 13 BTBD8      |
| 2.07E-26 | 0.342711254 | 0.4   | 0.215 | 6.65E-22 | 13 COX10-AS1  |
| 1.18E-28 | 0.342523539 | 0.671 | 0.428 | 3.80E-24 | 13 SPATA6     |
| 1.05E-23 | 0.342301552 | 0.606 | 0.39  | 3.36E-19 | 13 TAF3       |
| 8.50E-41 | 0.340576031 | 0.509 | 0.258 | 2.73E-36 | 13 AC009554.1 |
| 1.58E-26 | 0.339518457 | 0.488 | 0.29  | 5.08E-22 | 13 NUP58      |
| 8.64E-39 | 0.338489862 | 0.741 | 0.469 | 2.77E-34 | 13 PCNX4      |
| 2.63E-71 | 0.338309815 | 0.334 | 0.103 | 8.45E-67 | 13 GET1       |
| 2.03E-32 | 0.337732082 | 0.483 | 0.265 | 6.51E-28 | 13 KAT2B      |
| 1.59E-21 | 0.336733423 | 0.784 | 0.586 | 5.12E-17 | 13 OSBPL9     |
| 4.03E-64 | 0.335938154 | 0.295 | 0.089 | 1.29E-59 | 13 DDN-AS1    |
| 3.72E-25 | 0.335871876 | 0.66  | 0.452 | 1.20E-20 | 13 RNF115     |

|           |             |       |       |           |                 |
|-----------|-------------|-------|-------|-----------|-----------------|
| 1.36E-26  | 0.335346415 | 0.559 | 0.347 | 4.37E-22  | 13 SUSD6        |
| 5.58E-64  | 0.335139448 | 0.464 | 0.18  | 1.79E-59  | 13 NEDD9        |
| 8.31E-27  | 0.33339327  | 0.904 | 0.734 | 2.67E-22  | 13 LUC7L3       |
| 8.40E-25  | 0.333124267 | 0.653 | 0.438 | 2.70E-20  | 13 ABI2         |
| 1.47E-21  | 0.332954425 | 0.817 | 0.645 | 4.73E-17  | 13 FNBP1L       |
| 2.29E-35  | 0.332023024 | 0.543 | 0.294 | 7.34E-31  | 13 PLCB4        |
| 1.08E-25  | 0.331944066 | 0.799 | 0.581 | 3.46E-21  | 13 NT5C2        |
| 7.21E-61  | 0.331598974 | 0.353 | 0.123 | 2.32E-56  | 13 STX2         |
| 2.12E-132 | 0.330273023 | 0.25  | 0.039 | 6.79E-128 | 13 AL022324.1   |
| 2.23E-36  | 0.329018115 | 0.624 | 0.362 | 7.15E-32  | 13 ODF2L        |
| 9.96E-35  | 0.32879677  | 0.788 | 0.517 | 3.20E-30  | 13 ANKRD36      |
| 9.98E-25  | 0.328588931 | 0.301 | 0.151 | 3.21E-20  | 13 ANOS2P       |
| 7.62E-80  | 0.328461825 | 0.254 | 0.06  | 2.45E-75  | 13 ANTXR2       |
| 1.99E-23  | 0.328433941 | 0.812 | 0.618 | 6.39E-19  | 13 HERC4        |
| 1.95E-59  | 0.32768086  | 0.319 | 0.108 | 6.25E-55  | 13 ZNF596       |
| 1.00E-25  | 0.327215065 | 0.784 | 0.547 | 3.22E-21  | 13 LINC01278    |
| 1.91E-80  | 0.326678452 | 0.47  | 0.161 | 6.15E-76  | 13 DLC1         |
| 1.40E-49  | 0.326125355 | 0.323 | 0.12  | 4.50E-45  | 13 OSTF1        |
| 1.17E-42  | 0.324977382 | 0.272 | 0.101 | 3.75E-38  | 13 ZNF250       |
| 8.40E-22  | 0.324728265 | 0.52  | 0.329 | 2.70E-17  | 13 AC046134.2   |
| 3.87E-23  | 0.324418558 | 0.963 | 0.914 | 1.24E-18  | 13 GPHN         |
| 1.62E-21  | 0.323954027 | 0.859 | 0.685 | 5.22E-17  | 13 FAM172A      |
| 4.73E-31  | 0.323826128 | 0.499 | 0.276 | 1.52E-26  | 13 SMAD1        |
| 2.77E-26  | 0.323562902 | 0.593 | 0.365 | 8.89E-22  | 13 VRK2         |
| 3.28E-79  | 0.323393667 | 0.271 | 0.067 | 1.05E-74  | 13 CSCDC2       |
| 6.79E-60  | 0.321466141 | 0.279 | 0.086 | 2.18E-55  | 13 FAM47E       |
| 4.50E-33  | 0.321140475 | 0.308 | 0.136 | 1.44E-28  | 13 MYO1C        |
| 1.98E-57  | 0.320614661 | 0.373 | 0.138 | 6.35E-53  | 13 NBPF25P      |
| 7.08E-34  | 0.319433816 | 0.545 | 0.298 | 2.27E-29  | 13 ZNF37BP      |
| 3.27E-19  | 0.318761626 | 0.797 | 0.622 | 1.05E-14  | 13 DDX5         |
| 1.21E-22  | 0.317208453 | 0.762 | 0.557 | 3.90E-18  | 13 KIF1B        |
| 1.33E-46  | 0.317199963 | 0.353 | 0.141 | 4.28E-42  | 13 FAM20B       |
| 2.92E-62  | 0.316482233 | 0.284 | 0.084 | 9.36E-58  | 13 ALK          |
| 9.31E-58  | 0.316413354 | 0.348 | 0.122 | 2.99E-53  | 13 SYTL4        |
| 1.06E-31  | 0.316388237 | 0.272 | 0.113 | 3.39E-27  | 13 ADAMTSL4-AS1 |
| 1.74E-51  | 0.315655161 | 0.295 | 0.103 | 5.58E-47  | 13 GSTA4        |
| 1.73E-29  | 0.315525371 | 0.431 | 0.227 | 5.56E-25  | 13 CNIH3        |
| 1.99E-37  | 0.315099936 | 0.293 | 0.121 | 6.39E-33  | 13 AL117339.4   |
| 9.64E-54  | 0.314804869 | 0.318 | 0.11  | 3.10E-49  | 13 AFAP1        |
| 2.99E-30  | 0.314350826 | 0.63  | 0.376 | 9.61E-26  | 13 ZNF608       |
| 8.45E-21  | 0.314318093 | 0.775 | 0.586 | 2.72E-16  | 13 ZMYM4        |
| 1.98E-20  | 0.313840114 | 0.849 | 0.67  | 6.36E-16  | 13 NBEAL1       |
| 1.92E-32  | 0.313230514 | 0.522 | 0.294 | 6.16E-28  | 13 SMAD5        |
| 2.21E-28  | 0.3121534   | 0.564 | 0.328 | 7.11E-24  | 13 PLS3         |
| 2.36E-24  | 0.310566405 | 0.535 | 0.33  | 7.58E-20  | 13 RPS6KA2      |
| 3.84E-55  | 0.310178282 | 0.308 | 0.104 | 1.23E-50  | 13 DDX60        |
| 7.77E-32  | 0.310002296 | 0.648 | 0.399 | 2.50E-27  | 13 WASH3P       |
| 4.26E-35  | 0.308967992 | 0.838 | 0.556 | 1.37E-30  | 13 P3H2         |
| 2.05E-39  | 0.30890886  | 0.567 | 0.295 | 6.57E-35  | 13 AC092683.1   |
| 1.16E-41  | 0.308658113 | 0.496 | 0.239 | 3.74E-37  | 13 MTHFS        |
| 1.97E-19  | 0.307540545 | 0.629 | 0.437 | 6.32E-15  | 13 MTMR3        |

|          |             |       |       |          |                  |
|----------|-------------|-------|-------|----------|------------------|
| 3.62E-54 | 0.306556911 | 0.54  | 0.24  | 1.16E-49 | 13 ADAMTS9-AS1   |
| 5.38E-22 | 0.306510875 | 0.483 | 0.288 | 1.73E-17 | 13 LINC01515     |
| 4.93E-25 | 0.306182955 | 0.63  | 0.413 | 1.58E-20 | 13 EEA1          |
| 1.08E-32 | 0.305968435 | 0.314 | 0.141 | 3.47E-28 | 13 CXADR         |
| 4.09E-46 | 0.305749181 | 0.399 | 0.168 | 1.31E-41 | 13 CCDC88A       |
| 1.62E-17 | 0.304607283 | 0.494 | 0.319 | 5.20E-13 | 13 AC104123.1    |
| 5.16E-41 | 0.304355334 | 0.459 | 0.219 | 1.66E-36 | 13 MAL2          |
| 2.73E-20 | 0.304157438 | 0.739 | 0.523 | 8.78E-16 | 13 JARID2        |
| 1.31E-25 | 0.304093608 | 0.77  | 0.568 | 4.22E-21 | 13 USP53         |
| 3.98E-31 | 0.303833958 | 0.562 | 0.322 | 1.28E-26 | 13 HECTD2        |
| 2.50E-37 | 0.302924531 | 0.528 | 0.279 | 8.04E-33 | 13 WASH8P        |
| 3.41E-24 | 0.302890992 | 0.677 | 0.444 | 1.10E-19 | 13 RNF150        |
| 1.37E-55 | 0.301396522 | 0.306 | 0.103 | 4.40E-51 | 13 AC104806.2    |
| 3.71E-37 | 0.301245958 | 0.366 | 0.165 | 1.19E-32 | 13 LINC01359     |
| 3.40E-22 | 0.300788291 | 0.715 | 0.508 | 1.09E-17 | 13 RSRP1         |
| 8.05E-25 | 0.300522579 | 0.556 | 0.347 | 2.58E-20 | 13 APC           |
| 3.27E-56 | 0.300347708 | 0.306 | 0.101 | 1.05E-51 | 13 HOTAIRM1      |
| 1.39E-35 | 0.299334625 | 0.327 | 0.143 | 4.46E-31 | 13 HSPB11        |
| 1.43E-38 | 0.299180197 | 0.276 | 0.107 | 4.60E-34 | 13 EXOG          |
| 2.68E-44 | 0.299041093 | 0.305 | 0.115 | 8.62E-40 | 13 AC010615.4    |
| 1.86E-37 | 0.2976803   | 0.34  | 0.15  | 5.99E-33 | 13 ERMARD        |
| 2.53E-29 | 0.297181956 | 0.292 | 0.13  | 8.13E-25 | 13 AC090825.1    |
| 2.87E-30 | 0.295713575 | 0.524 | 0.304 | 9.21E-26 | 13 TIAL1         |
| 5.79E-44 | 0.293929544 | 0.301 | 0.114 | 1.86E-39 | 13 NOD1          |
| 6.27E-23 | 0.293881532 | 0.29  | 0.144 | 2.01E-18 | 13 HBG2          |
| 7.16E-41 | 0.293356178 | 0.31  | 0.124 | 2.30E-36 | 13 KYAT1         |
| 1.29E-38 | 0.293331093 | 0.423 | 0.198 | 4.15E-34 | 13 ZNF559-ZNF177 |
| 1.62E-12 | 0.292528823 | 0.365 | 0.238 | 5.20E-08 | 13 LINC01036     |
| 6.47E-36 | 0.290903267 | 0.389 | 0.184 | 2.08E-31 | 13 SRFBP1        |
| 1.42E-30 | 0.290859596 | 0.37  | 0.179 | 4.57E-26 | 13 CNTRL         |
| 2.11E-37 | 0.289664563 | 0.869 | 0.611 | 6.78E-33 | 13 PRKD1         |
| 1.06E-15 | 0.288431174 | 0.279 | 0.156 | 3.41E-11 | 13 HDAC9         |
| 2.19E-34 | 0.288120288 | 0.381 | 0.181 | 7.02E-30 | 13 PWWP3A        |
| 9.99E-30 | 0.287905663 | 0.436 | 0.23  | 3.21E-25 | 13 DCUN1D5       |
| 1.44E-20 | 0.287289145 | 0.707 | 0.497 | 4.63E-16 | 13 CCSER2        |
| 3.84E-20 | 0.286533104 | 0.554 | 0.37  | 1.23E-15 | 13 TNPO3         |
| 2.08E-28 | 0.285725114 | 0.739 | 0.495 | 6.67E-24 | 13 VPS13C        |
| 2.44E-41 | 0.28521579  | 0.353 | 0.144 | 7.84E-37 | 13 EPHA7         |
| 1.31E-24 | 0.283926297 | 0.335 | 0.172 | 4.22E-20 | 13 PHTF1         |
| 2.68E-51 | 0.28347403  | 0.256 | 0.081 | 8.60E-47 | 13 INTS6-AS1     |
| 5.44E-35 | 0.283257083 | 0.345 | 0.155 | 1.75E-30 | 13 ARMC10        |
| 1.65E-16 | 0.282725428 | 0.896 | 0.779 | 5.28E-12 | 13 AOPEP         |
| 3.49E-32 | 0.282076425 | 0.499 | 0.27  | 1.12E-27 | 13 CDK5RAP2      |
| 8.74E-23 | 0.281316744 | 0.947 | 0.811 | 2.81E-18 | 13 MAPK10        |
| 1.12E-29 | 0.281159651 | 0.52  | 0.295 | 3.59E-25 | 13 PTPN9         |
| 5.40E-31 | 0.281000741 | 0.392 | 0.195 | 1.73E-26 | 13 ICA1L         |
| 6.20E-41 | 0.280959433 | 0.264 | 0.098 | 1.99E-36 | 13 COPS5         |
| 4.44E-27 | 0.28053698  | 0.459 | 0.258 | 1.43E-22 | 13 RAB18         |
| 1.54E-37 | 0.278788728 | 0.284 | 0.111 | 4.93E-33 | 13 AHDC1         |
| 1.50E-37 | 0.278766852 | 0.306 | 0.126 | 4.82E-33 | 13 AC027097.1    |
| 1.12E-17 | 0.278619342 | 0.288 | 0.158 | 3.60E-13 | 13 LRP5L         |

|           |             |       |       |           |               |
|-----------|-------------|-------|-------|-----------|---------------|
| 7.42E-46  | 0.27756398  | 0.269 | 0.094 | 2.38E-41  | 13 CD302      |
| 5.19E-23  | 0.277057073 | 0.483 | 0.294 | 1.67E-18  | 13 WRN        |
| 1.95E-72  | 0.276459405 | 0.25  | 0.062 | 6.28E-68  | 13 AC022893.1 |
| 4.92E-44  | 0.276199748 | 0.295 | 0.11  | 1.58E-39  | 13 CTNNA2     |
| 5.36E-48  | 0.275793756 | 0.344 | 0.133 | 1.72E-43  | 13 NDUFB9     |
| 5.26E-49  | 0.27557014  | 0.609 | 0.293 | 1.69E-44  | 13 RAPGEF3    |
| 9.85E-19  | 0.2738869   | 0.786 | 0.592 | 3.16E-14  | 13 WWC2       |
| 4.36E-21  | 0.27265298  | 0.775 | 0.574 | 1.40E-16  | 13 EPS15      |
| 3.19E-36  | 0.272604538 | 0.355 | 0.159 | 1.02E-31  | 13 CALCOCO1   |
| 2.09E-34  | 0.272034532 | 0.361 | 0.167 | 6.72E-30  | 13 AL035530.2 |
| 2.44E-37  | 0.271485492 | 0.29  | 0.117 | 7.83E-33  | 13 TRIM5      |
| 9.74E-17  | 0.271078514 | 0.666 | 0.477 | 3.13E-12  | 13 AC116366.2 |
| 6.96E-19  | 0.270443328 | 0.901 | 0.774 | 2.23E-14  | 13 CUX1       |
| 2.93E-21  | 0.270278214 | 0.489 | 0.29  | 9.42E-17  | 13 PBX3       |
| 6.59E-39  | 0.269790594 | 0.284 | 0.108 | 2.12E-34  | 13 GABBR1     |
| 1.06E-18  | 0.268630518 | 0.425 | 0.256 | 3.42E-14  | 13 CNTN3      |
| 2.13E-19  | 0.268073433 | 0.742 | 0.552 | 6.84E-15  | 13 SRSF5      |
| 2.80E-17  | 0.267796586 | 0.499 | 0.321 | 9.00E-13  | 13 ACTB       |
| 8.67E-128 | 0.267758563 | 0.344 | 0.07  | 2.78E-123 | 13 RIPOR2     |
| 8.10E-25  | 0.267075521 | 0.331 | 0.165 | 2.60E-20  | 13 TPM4       |
| 8.54E-37  | 0.266402778 | 0.306 | 0.127 | 2.74E-32  | 13 AC107021.1 |
| 1.69E-34  | 0.265125305 | 0.256 | 0.099 | 5.42E-30  | 13 AC139795.2 |
| 2.92E-17  | 0.26490209  | 0.596 | 0.402 | 9.38E-13  | 13 LINC00271  |
| 1.27E-10  | 0.263113766 | 0.75  | 0.595 | 4.06E-06  | 13 TCF7L2     |
| 7.98E-17  | 0.261739703 | 0.76  | 0.569 | 2.56E-12  | 13 LUC7L2     |
| 4.27E-42  | 0.260598796 | 0.355 | 0.148 | 1.37E-37  | 13 AC240274.1 |
| 1.34E-41  | 0.26008711  | 0.261 | 0.095 | 4.31E-37  | 13 GALC       |
| 2.21E-25  | 0.257899995 | 0.306 | 0.147 | 7.11E-21  | 13 RFLNA      |
| 8.10E-22  | 0.257342782 | 0.618 | 0.409 | 2.60E-17  | 13 PDCD6IP    |
| 1.36E-29  | 0.257122133 | 0.464 | 0.246 | 4.37E-25  | 13 WASH2P     |
| 3.75E-25  | 0.256931595 | 0.267 | 0.124 | 1.21E-20  | 13 TNFSF13B   |
| 4.48E-24  | 0.256896398 | 0.449 | 0.252 | 1.44E-19  | 13 TRAF3      |
| 1.31E-18  | 0.256727257 | 0.804 | 0.597 | 4.20E-14  | 13 ZRANB2     |
| 7.05E-17  | 0.256025913 | 0.671 | 0.48  | 2.27E-12  | 13 USP45      |
| 6.30E-25  | 0.255760757 | 0.486 | 0.283 | 2.02E-20  | 13 MYEF2      |
| 2.67E-27  | 0.2552707   | 0.763 | 0.507 | 8.56E-23  | 13 ANKRD36C   |
| 6.65E-30  | 0.255203967 | 0.368 | 0.182 | 2.14E-25  | 13 RHOQ       |
| 1.75E-32  | 0.254614294 | 0.335 | 0.151 | 5.63E-28  | 13 SNX8       |
| 2.09E-19  | 0.254387484 | 0.742 | 0.528 | 6.72E-15  | 13 HIVEP2     |
| 1.74E-18  | 0.254129767 | 0.65  | 0.447 | 5.58E-14  | 13 CPSF6      |
| 5.96E-26  | 0.253386879 | 0.42  | 0.23  | 1.91E-21  | 13 IDS        |
| 1.23E-37  | 0.252736345 | 0.254 | 0.094 | 3.95E-33  | 13 GLI3       |
| 3.48E-05  | 0.252077692 | 0.478 | 0.396 | 1         | 13 CNTN4      |
| 1.51E-17  | 0.251890699 | 0.582 | 0.395 | 4.86E-13  | 13 PSMD1      |
| 4.90E-45  | 0.251640952 | 0.348 | 0.138 | 1.57E-40  | 13 RASGRP3    |
| 6.48E-16  | 0.251195248 | 0.794 | 0.611 | 2.08E-11  | 13 FER        |
| 8.91E-18  | 0.250504225 | 0.718 | 0.503 | 2.86E-13  | 13 ECPAS      |
| 1.37E-28  | 0.250011927 | 0.316 | 0.147 | 4.39E-24  | 13 MICA       |
| 0         | 2.952040749 | 0.85  | 0.208 | 0         | 14 FGF14      |
| 0         | 2.676313095 | 0.63  | 0.119 | 0         | 14 COL8A1     |
| 0         | 2.655810049 | 0.85  | 0.022 | 0         | 14 TMEM207    |

|           |             |       |       |           |                |
|-----------|-------------|-------|-------|-----------|----------------|
| 0         | 2.565847417 | 1     | 0.241 | 0         | 14 SLC12A1     |
| 0         | 2.547202328 | 0.981 | 0.198 | 0         | 14 RP1         |
| 0         | 2.534968016 | 0.901 | 0.081 | 0         | 14 CLDN16      |
| 0         | 2.483361384 | 0.974 | 0.195 | 0         | 14 UMOD        |
| 8.77E-264 | 2.420843435 | 0.794 | 0.226 | 2.82E-259 | 14 ENOX1       |
| 0         | 2.259314723 | 0.998 | 0.346 | 0         | 14 PLCB1       |
| 6.93E-193 | 2.057004218 | 0.956 | 0.502 | 2.23E-188 | 14 NAV2        |
| 0         | 1.982426344 | 0.854 | 0.211 | 0         | 14 SLC4A7      |
| 0         | 1.969492694 | 0.995 | 0.28  | 0         | 14 CASR        |
| 3.35E-205 | 1.912724976 | 0.929 | 0.509 | 1.08E-200 | 14 AL137782.1  |
| 0         | 1.845465496 | 0.914 | 0.116 | 0         | 14 GP2         |
| 0         | 1.819040898 | 0.935 | 0.239 | 0         | 14 AC068631.1  |
| 0         | 1.799425634 | 0.889 | 0.226 | 0         | 14 HS6ST2      |
| 1.37E-236 | 1.788410167 | 0.988 | 0.475 | 4.41E-232 | 14 PDE1A       |
| 7.55E-218 | 1.747285247 | 0.977 | 0.416 | 2.42E-213 | 14 SLC16A12    |
| 5.07E-209 | 1.738829159 | 0.993 | 0.608 | 1.63E-204 | 14 PRKD1       |
| 1.66E-223 | 1.731951058 | 1     | 0.761 | 5.32E-219 | 14 ERBB4       |
| 2.50E-254 | 1.699168028 | 0.986 | 0.375 | 8.03E-250 | 14 CACNA2D3    |
| 3.93E-304 | 1.671056558 | 0.811 | 0.202 | 1.26E-299 | 14 TENM4       |
| 1.48E-289 | 1.616808597 | 0.915 | 0.258 | 4.75E-285 | 14 ESRRB       |
| 7.55E-191 | 1.610231381 | 1     | 0.715 | 2.43E-186 | 14 CGNL1       |
| 1.10E-151 | 1.543462127 | 0.977 | 0.677 | 3.52E-147 | 14 WNK1        |
| 2.30E-186 | 1.504327213 | 0.908 | 0.37  | 7.40E-182 | 14 PCDH9       |
| 0         | 1.491663005 | 0.732 | 0.124 | 0         | 14 NTRK2       |
| 3.72E-216 | 1.481152012 | 0.979 | 0.563 | 1.19E-211 | 14 USP53       |
| 1.41E-227 | 1.472140447 | 0.942 | 0.328 | 4.53E-223 | 14 LINC01762   |
| 2.61E-163 | 1.471852902 | 0.933 | 0.449 | 8.40E-159 | 14 KCTD1       |
| 9.30E-194 | 1.462313654 | 0.966 | 0.49  | 2.99E-189 | 14 HIP1        |
| 1.81E-229 | 1.44384346  | 0.829 | 0.246 | 5.81E-225 | 14 RANBP3L     |
| 1.12E-249 | 1.442299916 | 0.949 | 0.345 | 3.59E-245 | 14 LINC01606   |
| 4.72E-190 | 1.441811828 | 0.958 | 0.498 | 1.52E-185 | 14 WDFY2       |
| 2.75E-123 | 1.424778341 | 0.97  | 0.607 | 8.83E-119 | 14 MRPS6       |
| 3.38E-185 | 1.419458684 | 1     | 0.741 | 1.09E-180 | 14 ARHGAP6     |
| 2.19E-148 | 1.406244911 | 0.891 | 0.442 | 7.03E-144 | 14 PPM1L       |
| 5.96E-137 | 1.393219006 | 0.654 | 0.227 | 1.92E-132 | 14 NPSR1-AS1   |
| 3.12E-192 | 1.38663502  | 1     | 0.787 | 1.00E-187 | 14 CCSER1      |
| 4.75E-286 | 1.36844677  | 0.81  | 0.196 | 1.53E-281 | 14 NRK         |
| 5.31E-203 | 1.359722444 | 0.824 | 0.264 | 1.71E-198 | 14 LINC02343   |
| 1.03E-119 | 1.330429395 | 0.954 | 0.616 | 3.31E-115 | 14 AC058822.1  |
| 5.64E-82  | 1.319733693 | 0.813 | 0.458 | 1.81E-77  | 14 GPC5        |
| 1.28E-250 | 1.317544313 | 0.635 | 0.139 | 4.11E-246 | 14 FXYD6-FXYD2 |
| 1.39E-219 | 1.309958978 | 0.758 | 0.235 | 4.45E-215 | 14 MERTK       |
| 9.32E-152 | 1.295621655 | 0.794 | 0.307 | 2.99E-147 | 14 RBFOX1      |
| 3.84E-104 | 1.294821751 | 0.915 | 0.555 | 1.23E-99  | 14 P3H2        |
| 8.54E-126 | 1.29111594  | 0.928 | 0.496 | 2.74E-121 | 14 DSCAML1     |
| 1.82E-178 | 1.285696604 | 0.929 | 0.413 | 5.86E-174 | 14 STK32B      |
| 1.08E-166 | 1.285219622 | 0.94  | 0.452 | 3.46E-162 | 14 KLHL13      |
| 8.72E-153 | 1.277839433 | 0.862 | 0.349 | 2.80E-148 | 14 NELL1       |
| 1.81E-155 | 1.277605849 | 0.951 | 0.475 | 5.81E-151 | 14 FKBP5       |
| 6.99E-180 | 1.268372831 | 0.887 | 0.373 | 2.24E-175 | 14 EFHD1       |
| 1.89E-163 | 1.260227082 | 0.949 | 0.48  | 6.06E-159 | 14 CCDC148     |



|           |             |       |       |           |               |
|-----------|-------------|-------|-------|-----------|---------------|
| 2.51E-285 | 1.255813157 | 0.675 | 0.129 | 8.06E-281 | 14 ACP3       |
| 2.59E-147 | 1.249977381 | 0.995 | 0.78  | 8.32E-143 | 14 PKP4       |
| 2.84E-103 | 1.24950395  | 0.631 | 0.249 | 9.14E-99  | 14 RUNX1      |
| 1.39E-191 | 1.241460838 | 0.841 | 0.281 | 4.46E-187 | 14 TMEM52B    |
| 8.46E-156 | 1.241314499 | 0.959 | 0.579 | 2.72E-151 | 14 CPEB3      |
| 8.95E-205 | 1.235600814 | 0.871 | 0.296 | 2.88E-200 | 14 UGT8       |
| 4.69E-162 | 1.227562873 | 0.894 | 0.383 | 1.51E-157 | 14 INPP4B     |
| 1.88E-149 | 1.225813339 | 0.958 | 0.543 | 6.02E-145 | 14 CYFIP2     |
| 0         | 1.211219652 | 0.649 | 0.081 | 0         | 14 NPY1R      |
| 0         | 1.198730537 | 0.723 | 0.112 | 0         | 14 SIM2       |
| 5.74E-151 | 1.184969205 | 0.956 | 0.421 | 1.84E-146 | 14 CPM        |
| 4.66E-57  | 1.183713368 | 0.794 | 0.534 | 1.50E-52  | 14 SVIL       |
| 6.28E-153 | 1.179021679 | 0.974 | 0.568 | 2.02E-148 | 14 CLCN5      |
| 5.41E-139 | 1.177855711 | 0.988 | 0.622 | 1.74E-134 | 14 ATP1A1     |
| 6.55E-189 | 1.177451312 | 0.785 | 0.257 | 2.10E-184 | 14 PANTR1     |
| 3.18E-151 | 1.172871456 | 0.993 | 0.709 | 1.02E-146 | 14 ATP1B1     |
| 4.81E-182 | 1.172791522 | 0.787 | 0.267 | 1.55E-177 | 14 NUDT4      |
| 4.20E-107 | 1.171247867 | 0.489 | 0.157 | 1.35E-102 | 14 PXDNL      |
| 8.28E-143 | 1.15698233  | 0.935 | 0.537 | 2.66E-138 | 14 HIBADH     |
| 8.26E-125 | 1.153304544 | 0.769 | 0.333 | 2.65E-120 | 14 AC138123.1 |
| 5.53E-102 | 1.148832302 | 0.907 | 0.541 | 1.77E-97  | 14 PRICKLE2   |
| 1.77E-124 | 1.143719933 | 0.891 | 0.439 | 5.67E-120 | 14 RNF150     |
| 1.47E-131 | 1.134369689 | 0.861 | 0.446 | 4.71E-127 | 14 LMO7       |
| 3.69E-192 | 1.132421305 | 0.721 | 0.209 | 1.19E-187 | 14 GNAI1      |
| 8.01E-128 | 1.126404811 | 0.762 | 0.322 | 2.57E-123 | 14 CREB3L2    |
| 4.71E-153 | 1.124031538 | 0.725 | 0.251 | 1.51E-148 | 14 ITGB6      |
| 6.40E-134 | 1.119686625 | 0.827 | 0.349 | 2.05E-129 | 14 LINC00970  |
| 1.08E-100 | 1.1118194   | 0.993 | 0.783 | 3.48E-96  | 14 PLCL1      |
| 5.87E-77  | 1.111045283 | 0.642 | 0.303 | 1.89E-72  | 14 P4HA1      |
| 6.11E-181 | 1.095576523 | 0.513 | 0.113 | 1.96E-176 | 14 SFRP1      |
| 1.53E-151 | 1.086142675 | 0.753 | 0.277 | 4.93E-147 | 14 SLC25A33   |
| 8.96E-78  | 1.08538562  | 0.82  | 0.512 | 2.88E-73  | 14 RHOBTB3    |
| 6.63E-143 | 1.085150019 | 0.649 | 0.211 | 2.13E-138 | 14 RIMBP2     |
| 2.60E-124 | 1.084767667 | 0.887 | 0.451 | 8.36E-120 | 14 STK39      |
| 2.69E-142 | 1.083983599 | 0.79  | 0.303 | 8.63E-138 | 14 AC087564.1 |
| 1.66E-97  | 1.073273306 | 0.84  | 0.426 | 5.34E-93  | 14 BICDL1     |
| 7.93E-119 | 1.070055263 | 0.802 | 0.359 | 2.55E-114 | 14 MGAT5      |
| 1.36E-143 | 1.066247392 | 0.755 | 0.266 | 4.35E-139 | 14 SEMA6D     |
| 1.71E-99  | 1.05978283  | 0.591 | 0.242 | 5.50E-95  | 14 CHP1       |
| 4.93E-116 | 1.057317902 | 0.866 | 0.431 | 1.58E-111 | 14 DEPTOR     |
| 8.13E-114 | 1.054106197 | 0.575 | 0.199 | 2.61E-109 | 14 MAPK4      |
| 1.04E-112 | 1.050337046 | 0.864 | 0.489 | 3.36E-108 | 14 ETNK1      |
| 4.49E-134 | 1.04135269  | 0.711 | 0.244 | 1.44E-129 | 14 LINC01182  |
| 7.86E-107 | 1.037835069 | 0.818 | 0.384 | 2.52E-102 | 14 MYO3B      |
| 1.05E-66  | 1.034296233 | 0.462 | 0.183 | 3.36E-62  | 14 HMCN1      |
| 2.14E-235 | 1.025624314 | 0.725 | 0.179 | 6.87E-231 | 14 PHF21B     |
| 8.06E-114 | 1.021216187 | 0.66  | 0.246 | 2.59E-109 | 14 LIPA       |
| 1.38E-145 | 1.007538441 | 0.545 | 0.149 | 4.45E-141 | 14 HDAC9      |
| 2.74E-237 | 1.005415718 | 0.714 | 0.175 | 8.79E-233 | 14 F11        |
| 7.29E-121 | 0.998314165 | 0.975 | 0.595 | 2.34E-116 | 14 AC012409.2 |
| 2.98E-127 | 0.993504952 | 0.868 | 0.404 | 9.59E-123 | 14 ARHGEF38   |

|           |             |       |       |           |               |
|-----------|-------------|-------|-------|-----------|---------------|
| 7.09E-83  | 0.977202098 | 0.954 | 0.666 | 2.28E-78  | 14 NHS        |
| 2.88E-99  | 0.971027906 | 0.827 | 0.396 | 9.24E-95  | 14 EGF        |
| 2.78E-207 | 0.966954141 | 0.591 | 0.133 | 8.92E-203 | 14 SPATC1     |
| 5.15E-132 | 0.966715243 | 0.914 | 0.408 | 1.65E-127 | 14 LINC01320  |
| 4.19E-190 | 0.961346885 | 0.806 | 0.272 | 1.35E-185 | 14 MTURN      |
| 7.23E-168 | 0.954304934 | 0.725 | 0.23  | 2.32E-163 | 14 PANK1      |
| 3.22E-89  | 0.944708749 | 0.73  | 0.371 | 1.03E-84  | 14 SEC14L1    |
| 1.03E-174 | 0.940651069 | 0.705 | 0.216 | 3.31E-170 | 14 ARRDC3     |
| 5.59E-106 | 0.934851319 | 0.577 | 0.198 | 1.79E-101 | 14 PPFIA2     |
| 1.53E-146 | 0.931317001 | 0.571 | 0.159 | 4.90E-142 | 14 DENND2A    |
| 5.27E-65  | 0.929508542 | 0.97  | 0.736 | 1.69E-60  | 14 OXR1       |
| 2.35E-128 | 0.924458402 | 0.919 | 0.506 | 7.54E-124 | 14 PDE4DIP    |
| 1.30E-131 | 0.920112488 | 0.49  | 0.128 | 4.18E-127 | 14 SCHLAP1    |
| 2.19E-41  | 0.914482462 | 0.702 | 0.41  | 7.03E-37  | 14 ACSL4      |
| 1.25E-280 | 0.907459137 | 0.566 | 0.1   | 4.01E-276 | 14 DNAJC19    |
| 2.58E-68  | 0.906748301 | 0.571 | 0.243 | 8.28E-64  | 14 AC012593.1 |
| 6.05E-124 | 0.906467355 | 0.797 | 0.332 | 1.94E-119 | 14 PIK3R1     |
| 4.64E-68  | 0.905691623 | 0.825 | 0.48  | 1.49E-63  | 14 AC138305.1 |
| 1.08E-157 | 0.905045497 | 0.813 | 0.285 | 3.46E-153 | 14 ZNF385B    |
| 2.03E-36  | 0.897693813 | 0.46  | 0.237 | 6.52E-32  | 14 LINGO2     |
| 2.74E-134 | 0.895161467 | 0.653 | 0.216 | 8.79E-130 | 14 AL139383.1 |
| 1.41E-144 | 0.891411198 | 0.432 | 0.097 | 4.52E-140 | 14 AL050403.2 |
| 9.58E-203 | 0.89068516  | 0.7   | 0.188 | 3.08E-198 | 14 FAM184A    |
| 3.21E-134 | 0.888698997 | 0.624 | 0.198 | 1.03E-129 | 14 AP000317.2 |
| 1.43E-67  | 0.874655146 | 0.314 | 0.095 | 4.59E-63  | 14 OPCML      |
| 2.79E-106 | 0.855100477 | 0.944 | 0.5   | 8.97E-102 | 14 SKAP1      |
| 2.11E-113 | 0.853088032 | 0.39  | 0.096 | 6.78E-109 | 14 LINC01350  |
| 2.54E-108 | 0.850245965 | 0.758 | 0.314 | 8.15E-104 | 14 UPP2       |
| 1.71E-162 | 0.849846074 | 0.515 | 0.122 | 5.49E-158 | 14 IFIT5      |
| 1.16E-170 | 0.848894089 | 0.57  | 0.14  | 3.72E-166 | 14 GAD1       |
| 2.55E-85  | 0.843340671 | 0.877 | 0.484 | 8.19E-81  | 14 MFHAS1     |
| 1.37E-121 | 0.842960071 | 0.69  | 0.247 | 4.39E-117 | 14 MGLL       |
| 4.44E-124 | 0.842869064 | 0.834 | 0.361 | 1.42E-119 | 14 TMEM72-AS1 |
| 2.12E-196 | 0.842790363 | 0.578 | 0.129 | 6.80E-192 | 14 GUCY1A1    |
| 3.26E-79  | 0.837947299 | 0.878 | 0.498 | 1.05E-74  | 14 LRP1B      |
| 4.06E-141 | 0.836395339 | 0.765 | 0.265 | 1.31E-136 | 14 ZNF385D    |
| 1.31E-66  | 0.835030588 | 0.577 | 0.252 | 4.22E-62  | 14 SYT1       |
| 6.48E-98  | 0.83014288  | 0.831 | 0.413 | 2.08E-93  | 14 STXBP4     |
| 6.25E-201 | 0.827828231 | 0.587 | 0.13  | 2.01E-196 | 14 TCIM       |
| 1.68E-84  | 0.824274817 | 0.628 | 0.266 | 5.40E-80  | 14 MALRD1     |
| 2.86E-133 | 0.823123444 | 0.799 | 0.278 | 9.19E-129 | 14 SGIP1      |
| 1.31E-91  | 0.823077342 | 0.423 | 0.131 | 4.22E-87  | 14 KLRD1      |
| 4.40E-73  | 0.809948605 | 0.958 | 0.657 | 1.41E-68  | 14 LGR4       |
| 8.35E-115 | 0.80714007  | 0.665 | 0.242 | 2.68E-110 | 14 MYLK       |
| 4.94E-98  | 0.801888762 | 0.945 | 0.563 | 1.59E-93  | 14 TBC1D4     |
| 3.77E-90  | 0.801060605 | 0.975 | 0.662 | 1.21E-85  | 14 PPARGC1A   |
| 3.48E-103 | 0.800287426 | 0.914 | 0.5   | 1.12E-98  | 14 FXYD2      |
| 6.59E-120 | 0.799748212 | 0.917 | 0.469 | 2.12E-115 | 14 AC241952.1 |
| 6.73E-52  | 0.799419139 | 0.697 | 0.401 | 2.16E-47  | 14 PDZRN3     |
| 4.87E-177 | 0.796627481 | 0.688 | 0.195 | 1.56E-172 | 14 CKB        |
| 1.36E-100 | 0.793743444 | 0.67  | 0.259 | 4.38E-96  | 14 HOMER1     |

|           |             |       |       |           |               |
|-----------|-------------|-------|-------|-----------|---------------|
| 2.00E-91  | 0.791091486 | 0.979 | 0.671 | 6.41E-87  | 14 ARHGAP24   |
| 3.86E-102 | 0.789233946 | 0.864 | 0.435 | 1.24E-97  | 14 MPC1       |
| 9.15E-89  | 0.786977023 | 0.898 | 0.52  | 2.94E-84  | 14 PTPN14     |
| 2.47E-103 | 0.785117164 | 0.617 | 0.233 | 7.95E-99  | 14 CCNB1IP1   |
| 4.51E-151 | 0.783099055 | 0.714 | 0.23  | 1.45E-146 | 14 ADGRV1     |
| 3.90E-132 | 0.777254564 | 0.675 | 0.242 | 1.25E-127 | 14 AC083843.2 |
| 2.04E-96  | 0.776561251 | 1     | 0.879 | 6.55E-92  | 14 ESRRG      |
| 1.75E-62  | 0.775614244 | 0.91  | 0.592 | 5.61E-58  | 14 PTPN4      |
| 2.04E-56  | 0.768968806 | 0.864 | 0.569 | 6.57E-52  | 14 FOXO3      |
| 1.86E-99  | 0.768314187 | 0.61  | 0.229 | 5.98E-95  | 14 COL28A1    |
| 3.16E-77  | 0.765589269 | 0.884 | 0.533 | 1.02E-72  | 14 FAM13A     |
| 1.28E-97  | 0.764078821 | 0.921 | 0.547 | 4.11E-93  | 14 AC138409.2 |
| 6.86E-90  | 0.763863701 | 0.993 | 0.768 | 2.20E-85  | 14 FARP1      |
| 1.03E-118 | 0.762194426 | 0.414 | 0.104 | 3.30E-114 | 14 VLDLR-AS1  |
| 5.79E-91  | 0.75671184  | 0.734 | 0.321 | 1.86E-86  | 14 ZNF98      |
| 7.60E-78  | 0.754550116 | 0.78  | 0.388 | 2.44E-73  | 14 INTS6      |
| 1.34E-111 | 0.748964132 | 0.767 | 0.319 | 4.30E-107 | 14 NR2F2-AS1  |
| 8.50E-74  | 0.747891966 | 0.908 | 0.551 | 2.73E-69  | 14 ARID5B     |
| 1.44E-95  | 0.742421234 | 0.996 | 0.883 | 4.64E-91  | 14 IMMP2L     |
| 2.05E-92  | 0.739797432 | 0.323 | 0.079 | 6.58E-88  | 14 KCNMA1     |
| 6.88E-61  | 0.738647688 | 0.335 | 0.109 | 2.21E-56  | 14 KCTD16     |
| 2.98E-103 | 0.737771268 | 0.884 | 0.447 | 9.58E-99  | 14 AC245297.3 |
| 2.24E-117 | 0.732491224 | 0.751 | 0.308 | 7.20E-113 | 14 Z98752.3   |
| 6.67E-56  | 0.730507243 | 0.813 | 0.484 | 2.14E-51  | 14 SLC20A2    |
| 1.13E-112 | 0.728021764 | 0.494 | 0.145 | 3.62E-108 | 14 SCN7A      |
| 3.18E-110 | 0.728019164 | 0.52  | 0.16  | 1.02E-105 | 14 U91319.1   |
| 9.23E-90  | 0.727924926 | 0.963 | 0.524 | 2.97E-85  | 14 OSBPL3     |
| 7.54E-78  | 0.722248521 | 0.808 | 0.426 | 2.42E-73  | 14 CMTM4      |
| 4.40E-94  | 0.72114915  | 0.72  | 0.316 | 1.41E-89  | 14 GNG7       |
| 3.35E-168 | 0.71928247  | 0.3   | 0.044 | 1.08E-163 | 14 AC093523.1 |
| 8.87E-75  | 0.715405904 | 0.885 | 0.512 | 2.85E-70  | 14 TAPT1-AS1  |
| 2.77E-78  | 0.711874343 | 0.633 | 0.28  | 8.90E-74  | 14 TMEM164    |
| 6.52E-95  | 0.711862728 | 0.827 | 0.428 | 2.09E-90  | 14 GUSBP16    |
| 7.56E-164 | 0.708593407 | 0.462 | 0.1   | 2.43E-159 | 14 AC124947.1 |
| 6.48E-146 | 0.708424821 | 0.568 | 0.157 | 2.08E-141 | 14 STK32A     |
| 0         | 0.706189356 | 0.481 | 0.059 | 0         | 14 RADX       |
| 8.10E-141 | 0.705468796 | 0.688 | 0.226 | 2.60E-136 | 14 AL137009.1 |
| 7.12E-72  | 0.704024819 | 0.7   | 0.35  | 2.29E-67  | 14 GABARAPL1  |
| 7.75E-108 | 0.703359726 | 0.792 | 0.334 | 2.49E-103 | 14 MROH7      |
| 4.15E-90  | 0.694116555 | 0.663 | 0.292 | 1.33E-85  | 14 PLA2G12A   |
| 1.12E-86  | 0.691296664 | 0.723 | 0.341 | 3.59E-82  | 14 AHCYL1     |
| 1.53E-76  | 0.68841242  | 0.878 | 0.498 | 4.90E-72  | 14 ZHX3       |
| 1.95E-69  | 0.680860733 | 0.504 | 0.196 | 6.25E-65  | 14 AQP4-AS1   |
| 7.39E-69  | 0.680566417 | 0.951 | 0.546 | 2.37E-64  | 14 EFNA5      |
| 4.87E-54  | 0.679823017 | 0.663 | 0.355 | 1.57E-49  | 14 MOB3B      |
| 4.08E-120 | 0.67834065  | 0.379 | 0.088 | 1.31E-115 | 14 GABRB1     |
| 5.87E-84  | 0.676810138 | 0.723 | 0.326 | 1.89E-79  | 14 CECR2      |
| 2.38E-95  | 0.676538508 | 0.704 | 0.295 | 7.63E-91  | 14 SLC39A10   |
| 5.02E-95  | 0.675769774 | 0.922 | 0.53  | 1.61E-90  | 14 AK3        |
| 3.54E-79  | 0.675212054 | 0.882 | 0.501 | 1.14E-74  | 14 RALGPS1    |
| 6.64E-82  | 0.674702116 | 0.848 | 0.478 | 2.13E-77  | 14 FXR1       |

|           |             |       |       |           |                 |
|-----------|-------------|-------|-------|-----------|-----------------|
| 2.29E-147 | 0.673901699 | 0.524 | 0.133 | 7.35E-143 | 14 MFSD4A       |
| 1.37E-188 | 0.671282931 | 0.628 | 0.15  | 4.41E-184 | 14 TFAP2B       |
| 3.46E-88  | 0.671120087 | 0.855 | 0.457 | 1.11E-83  | 14 GUSBP2       |
| 2.16E-222 | 0.670356988 | 0.409 | 0.062 | 6.94E-218 | 14 AC087045.3   |
| 3.81E-64  | 0.668370377 | 0.937 | 0.583 | 1.22E-59  | 14 PDE7B        |
| 5.79E-143 | 0.667102364 | 0.601 | 0.173 | 1.86E-138 | 14 AGPAT4       |
| 2.74E-93  | 0.661724153 | 0.824 | 0.422 | 8.81E-89  | 14 CDH12        |
| 1.13E-114 | 0.660107514 | 0.413 | 0.103 | 3.64E-110 | 14 RBM20        |
| 1.74E-84  | 0.659933461 | 0.843 | 0.448 | 5.57E-80  | 14 C2CD5        |
| 1.72E-122 | 0.658249061 | 0.624 | 0.199 | 5.53E-118 | 14 PRKCQ        |
| 6.90E-103 | 0.657000434 | 0.626 | 0.227 | 2.22E-98  | 14 SLC2A13      |
| 2.15E-99  | 0.656129272 | 0.517 | 0.164 | 6.89E-95  | 14 SHISA9       |
| 9.45E-92  | 0.655235245 | 0.487 | 0.161 | 3.04E-87  | 14 LAMA1        |
| 2.09E-69  | 0.654674401 | 0.88  | 0.501 | 6.71E-65  | 14 PPP1CB       |
| 3.12E-174 | 0.653885827 | 0.367 | 0.061 | 1.00E-169 | 14 TSPAN8       |
| 2.06E-154 | 0.6525078   | 0.647 | 0.18  | 6.63E-150 | 14 PRKX         |
| 2.08E-108 | 0.651637034 | 0.522 | 0.16  | 6.68E-104 | 14 JAG1         |
| 3.82E-143 | 0.651503514 | 0.517 | 0.13  | 1.23E-138 | 14 AP000282.1   |
| 4.19E-78  | 0.6500269   | 0.751 | 0.339 | 1.34E-73  | 14 CADM1        |
| 1.72E-81  | 0.649899943 | 0.788 | 0.409 | 5.52E-77  | 14 CEP70        |
| 3.86E-76  | 0.649111743 | 0.889 | 0.5   | 1.24E-71  | 14 TMEM161B-AS1 |
| 1.06E-87  | 0.647680352 | 0.824 | 0.377 | 3.42E-83  | 14 SIM1         |
| 1.68E-107 | 0.646831364 | 0.711 | 0.279 | 5.40E-103 | 14 GSAP         |
| 3.04E-73  | 0.644532414 | 0.963 | 0.69  | 9.76E-69  | 14 GUSBP1       |
| 3.48E-72  | 0.643751846 | 0.989 | 0.78  | 1.12E-67  | 14 FGD4         |
| 2.73E-64  | 0.638402694 | 0.787 | 0.433 | 8.78E-60  | 14 UBE2E3       |
| 8.79E-62  | 0.633839409 | 0.767 | 0.414 | 2.82E-57  | 14 TMEM232      |
| 9.69E-89  | 0.631762716 | 0.563 | 0.206 | 3.11E-84  | 14 C12orf40     |
| 7.28E-72  | 0.631058754 | 1     | 0.776 | 2.34E-67  | 14 MECOM        |
| 1.55E-113 | 0.630639629 | 0.642 | 0.22  | 4.97E-109 | 14 FGF9         |
| 2.37E-91  | 0.628520406 | 0.848 | 0.422 | 7.63E-87  | 14 SCNN1A       |
| 3.86E-78  | 0.625108808 | 0.834 | 0.425 | 1.24E-73  | 14 ACOT11       |
| 5.30E-75  | 0.624844722 | 0.653 | 0.272 | 1.70E-70  | 14 CACNB4       |
| 1.90E-63  | 0.621607575 | 0.917 | 0.589 | 6.09E-59  | 14 WWC2         |
| 3.82E-65  | 0.618051835 | 0.993 | 0.782 | 1.23E-60  | 14 NAALADL2     |
| 1.31E-38  | 0.617636431 | 0.887 | 0.615 | 4.20E-34  | 14 STPG2        |
| 1.92E-92  | 0.615984763 | 0.688 | 0.282 | 6.18E-88  | 14 LINC00476    |
| 4.70E-129 | 0.614971661 | 0.511 | 0.138 | 1.51E-124 | 14 GMPR         |
| 3.88E-141 | 0.612196518 | 0.654 | 0.193 | 1.25E-136 | 14 KNG1         |
| 8.47E-61  | 0.611684511 | 0.952 | 0.678 | 2.72E-56  | 14 ABLIM1       |
| 1.27E-104 | 0.611432178 | 0.631 | 0.221 | 4.09E-100 | 14 KCNJ1        |
| 5.28E-60  | 0.610923967 | 0.787 | 0.432 | 1.70E-55  | 14 RASSF8       |
| 1.19E-74  | 0.610572892 | 0.921 | 0.565 | 3.83E-70  | 14 LUC7L2       |
| 2.04E-61  | 0.610198483 | 0.989 | 0.672 | 6.54E-57  | 14 AC005208.1   |
| 3.03E-101 | 0.608692291 | 0.589 | 0.204 | 9.74E-97  | 14 TLE1         |
| 2.75E-135 | 0.608367296 | 0.37  | 0.076 | 8.82E-131 | 14 LINC00113    |
| 4.35E-34  | 0.60710425  | 0.644 | 0.386 | 1.40E-29  | 14 SGO1-AS1     |
| 7.91E-127 | 0.606772315 | 0.503 | 0.141 | 2.54E-122 | 14 LINC02340    |
| 1.73E-56  | 0.605167091 | 0.755 | 0.427 | 5.56E-52  | 14 C1QTNF3-AMAC |
| 3.12E-121 | 0.604870579 | 0.616 | 0.195 | 1.00E-116 | 14 RNF144B      |
| 1.81E-118 | 0.604350605 | 0.66  | 0.223 | 5.80E-114 | 14 SUS4         |

|           |             |       |       |           |               |
|-----------|-------------|-------|-------|-----------|---------------|
| 2.33E-74  | 0.60420782  | 0.811 | 0.424 | 7.47E-70  | 14 ATP2C1     |
| 2.55E-80  | 0.604053127 | 0.855 | 0.433 | 8.18E-76  | 14 KCNJ16     |
| 1.31E-53  | 0.603522504 | 0.524 | 0.234 | 4.21E-49  | 14 LINC01036  |
| 7.79E-61  | 0.602814913 | 0.788 | 0.411 | 2.50E-56  | 14 SLC16A7    |
| 4.14E-112 | 0.602448156 | 0.284 | 0.055 | 1.33E-107 | 14 AC004917.1 |
| 1.50E-114 | 0.601230399 | 0.638 | 0.213 | 4.82E-110 | 14 LINC00484  |
| 6.04E-111 | 0.600776861 | 0.575 | 0.184 | 1.94E-106 | 14 NR2F1-AS1  |
| 8.36E-99  | 0.598279402 | 0.721 | 0.312 | 2.69E-94  | 14 GUSBP13    |
| 1.20E-67  | 0.596587777 | 0.81  | 0.41  | 3.85E-63  | 14 ANK2       |
| 6.16E-57  | 0.59652878  | 0.43  | 0.167 | 1.98E-52  | 14 AP1S3      |
| 9.72E-75  | 0.596057621 | 0.416 | 0.141 | 3.12E-70  | 14 AC097515.1 |
| 1.14E-87  | 0.594764434 | 0.566 | 0.209 | 3.65E-83  | 14 FAM83B     |
| 1.02E-73  | 0.594222434 | 0.533 | 0.211 | 3.28E-69  | 14 TPST2      |
| 1.44E-76  | 0.593605544 | 0.832 | 0.426 | 4.64E-72  | 14 GCNT2      |
| 2.41E-116 | 0.588806681 | 0.681 | 0.244 | 7.75E-112 | 14 AC244669.2 |
| 8.32E-46  | 0.587141592 | 0.323 | 0.123 | 2.67E-41  | 14 RGS7       |
| 3.60E-61  | 0.586722492 | 0.767 | 0.404 | 1.16E-56  | 14 CACNA1D    |
| 1.03E-68  | 0.584042211 | 0.67  | 0.307 | 3.32E-64  | 14 MYOF       |
| 1.94E-70  | 0.582997917 | 0.501 | 0.193 | 6.24E-66  | 14 AC016705.2 |
| 4.16E-149 | 0.582617394 | 0.489 | 0.114 | 1.34E-144 | 14 KCNN3      |
| 1.77E-60  | 0.580659151 | 0.467 | 0.191 | 5.68E-56  | 14 PRANCR     |
| 1.90E-94  | 0.580165632 | 0.6   | 0.215 | 6.11E-90  | 14 MEF2C      |
| 2.19E-57  | 0.578754166 | 0.61  | 0.297 | 7.03E-53  | 14 AC021231.1 |
| 5.91E-79  | 0.578553849 | 0.43  | 0.139 | 1.90E-74  | 14 SHISA6     |
| 6.12E-85  | 0.577337367 | 0.774 | 0.361 | 1.97E-80  | 14 CFAP70     |
| 7.20E-82  | 0.576733943 | 0.711 | 0.322 | 2.31E-77  | 14 NCBP1      |
| 3.29E-61  | 0.576182887 | 0.617 | 0.286 | 1.06E-56  | 14 CYP7B1     |
| 1.19E-60  | 0.574402505 | 0.903 | 0.545 | 3.82E-56  | 14 ZBTB16     |
| 2.46E-112 | 0.574012728 | 0.571 | 0.188 | 7.89E-108 | 14 RAP2C      |
| 1.17E-51  | 0.573609417 | 0.963 | 0.71  | 3.75E-47  | 14 NCOA2      |
| 1.36E-57  | 0.572866562 | 0.75  | 0.409 | 4.37E-53  | 14 MPDZ       |
| 9.96E-99  | 0.572481722 | 0.619 | 0.232 | 3.20E-94  | 14 TTC7A      |
| 1.02E-61  | 0.570095236 | 0.887 | 0.543 | 3.27E-57  | 14 TSC22D2    |
| 5.10E-81  | 0.568727742 | 0.757 | 0.367 | 1.64E-76  | 14 OIP5-AS1   |
| 2.26E-54  | 0.568078666 | 0.411 | 0.159 | 7.26E-50  | 14 BDKRB2     |
| 1.06E-58  | 0.563499289 | 0.933 | 0.631 | 3.41E-54  | 14 USP25      |
| 4.98E-84  | 0.562446439 | 0.834 | 0.385 | 1.60E-79  | 14 DNMT3      |
| 3.04E-80  | 0.562243447 | 0.504 | 0.185 | 9.77E-76  | 14 MEF2C-AS1  |
| 3.49E-74  | 0.561672083 | 0.887 | 0.483 | 1.12E-69  | 14 HOXB3      |
| 2.21E-74  | 0.56150833  | 0.737 | 0.357 | 7.11E-70  | 14 MDM2       |
| 1.82E-51  | 0.561362197 | 0.958 | 0.676 | 5.84E-47  | 14 TFCEP2L1   |
| 7.19E-70  | 0.561093524 | 0.612 | 0.258 | 2.31E-65  | 14 SCD5       |
| 1.89E-67  | 0.560319149 | 0.843 | 0.472 | 6.07E-63  | 14 SLC25A12   |
| 1.14E-81  | 0.559782433 | 0.437 | 0.142 | 3.68E-77  | 14 KCNH1      |
| 4.32E-64  | 0.559553187 | 0.776 | 0.421 | 1.39E-59  | 14 FBXL4      |
| 1.35E-129 | 0.559126694 | 0.451 | 0.111 | 4.34E-125 | 14 MIR503HG   |
| 1.58E-143 | 0.558902353 | 0.437 | 0.097 | 5.07E-139 | 14 EHF        |
| 3.50E-98  | 0.556838362 | 0.517 | 0.175 | 1.12E-93  | 14 DDB1       |
| 2.00E-92  | 0.556692334 | 0.705 | 0.285 | 6.43E-88  | 14 CCND3      |
| 1.46E-87  | 0.554232371 | 0.388 | 0.113 | 4.69E-83  | 14 ARFGEF3    |
| 1.18E-59  | 0.553978684 | 0.961 | 0.652 | 3.78E-55  | 14 APP        |

|           |             |       |       |           |               |
|-----------|-------------|-------|-------|-----------|---------------|
| 1.03E-46  | 0.552458311 | 0.843 | 0.546 | 3.31E-42  | 14 LINC01278  |
| 5.57E-88  | 0.547966337 | 0.374 | 0.104 | 1.79E-83  | 14 GRIK2      |
| 1.27E-100 | 0.547335132 | 0.658 | 0.245 | 4.08E-96  | 14 AC018730.1 |
| 1.17E-76  | 0.545350193 | 0.734 | 0.353 | 3.76E-72  | 14 GUSBP17    |
| 4.01E-33  | 0.544313995 | 0.677 | 0.428 | 1.29E-28  | 14 VCL        |
| 1.71E-86  | 0.542557123 | 0.862 | 0.45  | 5.49E-82  | 14 DACH1      |
| 2.01E-25  | 0.541910555 | 0.781 | 0.56  | 6.46E-21  | 14 UVVAG      |
| 1.17E-99  | 0.541814308 | 0.616 | 0.225 | 3.75E-95  | 14 OVOL2      |
| 8.98E-51  | 0.539616388 | 0.928 | 0.63  | 2.89E-46  | 14 MBNL2      |
| 9.13E-138 | 0.538684103 | 0.646 | 0.194 | 2.93E-133 | 14 USP2       |
| 4.52E-252 | 0.538103227 | 0.27  | 0.023 | 1.45E-247 | 14 LINC02198  |
| 5.49E-60  | 0.5361037   | 0.822 | 0.464 | 1.76E-55  | 14 CLINT1     |
| 3.86E-57  | 0.536023102 | 0.644 | 0.311 | 1.24E-52  | 14 RPS6KA6    |
| 1.99E-40  | 0.534911623 | 0.7   | 0.388 | 6.38E-36  | 14 FGF13      |
| 7.44E-105 | 0.53407174  | 0.603 | 0.218 | 2.39E-100 | 14 GUSBP14    |
| 9.76E-46  | 0.533047461 | 0.651 | 0.348 | 3.13E-41  | 14 AASS       |
| 1.12E-44  | 0.532681072 | 0.928 | 0.666 | 3.60E-40  | 14 PTGER3     |
| 3.75E-45  | 0.53116384  | 0.792 | 0.463 | 1.20E-40  | 14 LINC01725  |
| 1.39E-54  | 0.529410387 | 0.944 | 0.613 | 4.45E-50  | 14 ACACB      |
| 1.25E-56  | 0.528656106 | 0.711 | 0.373 | 4.00E-52  | 14 KATNAL2    |
| 2.73E-39  | 0.528202661 | 0.325 | 0.133 | 8.76E-35  | 14 RIMS2      |
| 2.18E-25  | 0.527440047 | 0.354 | 0.183 | 7.01E-21  | 14 NKAIN2     |
| 3.10E-69  | 0.526947153 | 0.764 | 0.39  | 9.97E-65  | 14 GNAS       |
| 1.50E-139 | 0.526633297 | 0.436 | 0.097 | 4.81E-135 | 14 EPHA4      |
| 4.59E-38  | 0.525450776 | 0.709 | 0.418 | 1.47E-33  | 14 PDK4       |
| 3.49E-53  | 0.524218448 | 0.275 | 0.087 | 1.12E-48  | 14 SORCS3     |
| 6.26E-71  | 0.523923794 | 0.489 | 0.186 | 2.01E-66  | 14 ELOVL6     |
| 1.20E-152 | 0.523607981 | 0.328 | 0.055 | 3.85E-148 | 14 AP000695.2 |
| 7.49E-76  | 0.522824632 | 0.541 | 0.213 | 2.41E-71  | 14 AL132780.1 |
| 4.20E-88  | 0.52150469  | 0.697 | 0.286 | 1.35E-83  | 14 SH3BP4     |
| 2.39E-114 | 0.521357808 | 0.478 | 0.133 | 7.67E-110 | 14 MTCL1      |
| 2.24E-59  | 0.520952383 | 0.556 | 0.244 | 7.20E-55  | 14 CASC2      |
| 8.21E-40  | 0.520837521 | 0.898 | 0.612 | 2.64E-35  | 14 KCNIP4     |
| 1.72E-95  | 0.517045444 | 0.453 | 0.139 | 5.53E-91  | 14 RRAGD      |
| 5.48E-84  | 0.516646232 | 0.623 | 0.249 | 1.76E-79  | 14 LPIN1      |
| 3.80E-88  | 0.513046304 | 0.628 | 0.251 | 1.22E-83  | 14 AC073283.3 |
| 2.07E-45  | 0.511081495 | 0.623 | 0.328 | 6.63E-41  | 14 NMD3       |
| 1.44E-48  | 0.510747735 | 0.975 | 0.742 | 4.61E-44  | 14 ATXN1      |
| 3.90E-50  | 0.510119795 | 0.718 | 0.398 | 1.25E-45  | 14 MAGED1     |
| 2.12E-98  | 0.509598493 | 0.404 | 0.11  | 6.81E-94  | 14 ASRGL1     |
| 2.70E-74  | 0.504649239 | 0.563 | 0.222 | 8.68E-70  | 14 MAMDC2-AS1 |
| 7.14E-62  | 0.504644358 | 0.72  | 0.359 | 2.29E-57  | 14 CAPN2      |
| 2.01E-62  | 0.504348573 | 0.584 | 0.247 | 6.46E-58  | 14 AC068547.1 |
| 1.40E-51  | 0.503766235 | 0.624 | 0.315 | 4.49E-47  | 14 AMMECR1    |
| 1.38E-43  | 0.502923077 | 0.681 | 0.378 | 4.43E-39  | 14 RAP2C-AS1  |
| 7.36E-52  | 0.502745103 | 0.737 | 0.411 | 2.36E-47  | 14 EEA1       |
| 1.68E-81  | 0.502697541 | 0.755 | 0.35  | 5.40E-77  | 14 NAIP       |
| 2.12E-45  | 0.502273612 | 0.76  | 0.428 | 6.80E-41  | 14 SUCLG2-AS1 |
| 1.43E-105 | 0.501995815 | 0.287 | 0.059 | 4.60E-101 | 14 SYBU       |
| 8.69E-92  | 0.499671033 | 0.663 | 0.266 | 2.79E-87  | 14 NAIPP4     |
| 1.17E-66  | 0.499617642 | 0.545 | 0.23  | 3.77E-62  | 14 ACSS1      |

|           |             |       |       |           |                 |
|-----------|-------------|-------|-------|-----------|-----------------|
| 3.58E-183 | 0.498815647 | 0.411 | 0.073 | 1.15E-178 | 14 KCNJ10       |
| 2.05E-74  | 0.498449937 | 0.503 | 0.189 | 6.58E-70  | 14 PRDX6-AS1    |
| 5.37E-49  | 0.498319066 | 0.776 | 0.44  | 1.72E-44  | 14 ATG10        |
| 2.03E-58  | 0.496321976 | 0.751 | 0.392 | 6.53E-54  | 14 ACSS3        |
| 3.05E-63  | 0.494617098 | 0.506 | 0.203 | 9.78E-59  | 14 AC104596.1   |
| 7.44E-61  | 0.494401633 | 0.718 | 0.362 | 2.39E-56  | 14 CMC1         |
| 4.40E-54  | 0.494205618 | 0.624 | 0.309 | 1.41E-49  | 14 FSIP2        |
| 1.36E-63  | 0.492334634 | 0.563 | 0.254 | 4.38E-59  | 14 NBN          |
| 1.64E-59  | 0.492218069 | 0.52  | 0.221 | 5.25E-55  | 14 OXCT1        |
| 3.88E-61  | 0.491103978 | 0.453 | 0.176 | 1.25E-56  | 14 HLF          |
| 2.13E-56  | 0.48959672  | 0.877 | 0.52  | 6.85E-52  | 14 LIFR         |
| 3.57E-83  | 0.489013289 | 0.501 | 0.176 | 1.15E-78  | 14 C21orf62-AS1 |
| 7.23E-56  | 0.488895268 | 0.631 | 0.303 | 2.32E-51  | 14 MST1L        |
| 1.55E-62  | 0.487883896 | 0.693 | 0.336 | 4.96E-58  | 14 AC053527.2   |
| 1.22E-50  | 0.48720491  | 0.656 | 0.327 | 3.92E-46  | 14 AC040174.1   |
| 1.41E-77  | 0.485853852 | 0.358 | 0.108 | 4.52E-73  | 14 VAMP4        |
| 2.12E-42  | 0.485722685 | 0.811 | 0.508 | 6.82E-38  | 14 BCKDHB       |
| 5.92E-54  | 0.483119766 | 0.878 | 0.496 | 1.90E-49  | 14 TRIM2        |
| 4.94E-69  | 0.483069802 | 0.661 | 0.292 | 1.59E-64  | 14 PLEKHH2      |
| 7.29E-55  | 0.482331229 | 0.804 | 0.456 | 2.34E-50  | 14 ZFAND5       |
| 7.20E-46  | 0.482032989 | 0.993 | 0.818 | 2.31E-41  | 14 PCCA         |
| 2.88E-53  | 0.480946407 | 1     | 0.824 | 9.24E-49  | 14 MSI2         |
| 3.63E-110 | 0.478540388 | 0.323 | 0.069 | 1.17E-105 | 14 DIPK2A       |
| 7.49E-72  | 0.477342338 | 0.571 | 0.233 | 2.41E-67  | 14 OCLN         |
| 4.52E-67  | 0.477276024 | 0.578 | 0.247 | 1.45E-62  | 14 SGCE         |
| 1.67E-68  | 0.477131322 | 0.455 | 0.167 | 5.37E-64  | 14 SPATA1       |
| 7.10E-37  | 0.476754088 | 0.439 | 0.213 | 2.28E-32  | 14 SOX2-OT      |
| 2.18E-88  | 0.476479861 | 0.326 | 0.084 | 7.02E-84  | 14 ETV5         |
| 8.49E-94  | 0.475372946 | 0.42  | 0.122 | 2.73E-89  | 14 USP13        |
| 9.30E-90  | 0.475258702 | 0.476 | 0.148 | 2.99E-85  | 14 AC024022.1   |
| 1.36E-20  | 0.474386991 | 0.739 | 0.486 | 4.38E-16  | 14 SNX9         |
| 2.19E-103 | 0.473481673 | 0.392 | 0.101 | 7.02E-99  | 14 USP2-AS1     |
| 1.65E-59  | 0.472705412 | 0.501 | 0.21  | 5.31E-55  | 14 SMS          |
| 4.04E-36  | 0.471969363 | 0.938 | 0.687 | 1.30E-31  | 14 UBE2H        |
| 2.71E-45  | 0.471552753 | 0.469 | 0.216 | 8.72E-41  | 14 PPM1K        |
| 4.68E-83  | 0.471160988 | 0.575 | 0.22  | 1.50E-78  | 14 BDH1         |
| 3.19E-91  | 0.469925392 | 0.286 | 0.064 | 1.03E-86  | 14 AC092546.1   |
| 2.70E-56  | 0.46943094  | 0.924 | 0.609 | 8.67E-52  | 14 USP24        |
| 3.64E-46  | 0.468329042 | 0.792 | 0.46  | 1.17E-41  | 14 RBBP8        |
| 7.73E-95  | 0.467589358 | 0.422 | 0.121 | 2.48E-90  | 14 SYTL4        |
| 2.50E-55  | 0.467483926 | 0.996 | 0.835 | 8.02E-51  | 14 LRBA         |
| 4.94E-65  | 0.467129358 | 0.608 | 0.274 | 1.59E-60  | 14 LINC02241    |
| 2.49E-76  | 0.466724129 | 0.603 | 0.242 | 8.00E-72  | 14 KHDRBS3      |
| 2.45E-133 | 0.466556863 | 0.358 | 0.072 | 7.86E-129 | 14 IFIT1        |
| 2.77E-54  | 0.465569094 | 0.427 | 0.169 | 8.90E-50  | 14 AC138627.1   |
| 4.35E-65  | 0.464687561 | 0.668 | 0.315 | 1.40E-60  | 14 CTIF         |
| 1.02E-69  | 0.464014033 | 0.772 | 0.356 | 3.28E-65  | 14 GRHL2        |
| 1.41E-44  | 0.461503468 | 0.642 | 0.341 | 4.52E-40  | 14 DSE          |
| 3.82E-62  | 0.460951123 | 0.723 | 0.351 | 1.23E-57  | 14 SGPP2        |
| 1.58E-50  | 0.459156623 | 0.792 | 0.461 | 5.06E-46  | 14 PIAS2        |
| 1.77E-83  | 0.457020636 | 0.644 | 0.269 | 5.68E-79  | 14 GUSBP3       |

|           |             |       |       |           |                |
|-----------|-------------|-------|-------|-----------|----------------|
| 1.30E-46  | 0.456603605 | 0.702 | 0.391 | 4.19E-42  | 14 LNPEP       |
| 3.03E-28  | 0.456485169 | 0.362 | 0.178 | 9.73E-24  | 14 LINC01505   |
| 3.76E-37  | 0.455169336 | 0.605 | 0.332 | 1.21E-32  | 14 ZRANB2-AS2  |
| 2.33E-181 | 0.454962838 | 0.365 | 0.058 | 7.47E-177 | 14 TMEM171     |
| 2.03E-15  | 0.454886063 | 0.543 | 0.372 | 6.53E-11  | 14 SAMD4A      |
| 1.03E-42  | 0.453863131 | 0.922 | 0.628 | 3.31E-38  | 14 CLMN        |
| 4.81E-67  | 0.453205016 | 0.635 | 0.284 | 1.54E-62  | 14 LDHB        |
| 1.15E-70  | 0.452306902 | 0.437 | 0.154 | 3.70E-66  | 14 CCDC148-AS1 |
| 5.32E-55  | 0.452181345 | 0.536 | 0.24  | 1.71E-50  | 14 ATP6AP1L    |
| 1.72E-39  | 0.45160696  | 0.905 | 0.615 | 5.53E-35  | 14 AUH         |
| 2.79E-76  | 0.450271783 | 0.404 | 0.132 | 8.96E-72  | 14 TOB1        |
| 9.63E-50  | 0.449904451 | 0.836 | 0.507 | 3.09E-45  | 14 MIR29B2CHG  |
| 2.49E-33  | 0.448637826 | 0.885 | 0.606 | 7.99E-29  | 14 KLF12       |
| 1.99E-274 | 0.445557418 | 0.272 | 0.022 | 6.38E-270 | 14 ZDHHC8P1    |
| 6.98E-78  | 0.445085379 | 0.511 | 0.183 | 2.24E-73  | 14 ABHD17C     |
| 2.80E-194 | 0.444399875 | 0.309 | 0.04  | 9.01E-190 | 14 AL161782.1  |
| 2.65E-64  | 0.442748315 | 0.725 | 0.333 | 8.51E-60  | 14 BLNK        |
| 5.50E-68  | 0.439405768 | 0.571 | 0.244 | 1.77E-63  | 14 AC244669.1  |
| 1.20E-85  | 0.437767964 | 0.437 | 0.134 | 3.84E-81  | 14 GPR132      |
| 6.69E-47  | 0.437678206 | 0.778 | 0.443 | 2.15E-42  | 14 NNT         |
| 1.59E-68  | 0.436296066 | 0.434 | 0.154 | 5.10E-64  | 14 CHMP1B2P    |
| 2.59E-77  | 0.435323459 | 1     | 0.882 | 8.32E-73  | 14 MAGI1       |
| 2.29E-50  | 0.435096873 | 0.762 | 0.418 | 7.35E-46  | 14 DAAM1       |
| 4.76E-33  | 0.435051975 | 0.855 | 0.59  | 1.53E-28  | 14 DAB1        |
| 1.34E-43  | 0.432670765 | 0.855 | 0.54  | 4.31E-39  | 14 AC093752.1  |
| 9.32E-47  | 0.432407277 | 0.896 | 0.529 | 2.99E-42  | 14 MYO10       |
| 7.92E-80  | 0.432216074 | 0.485 | 0.171 | 2.55E-75  | 14 SMC5-AS1    |
| 1.39E-98  | 0.431895274 | 0.395 | 0.106 | 4.48E-94  | 14 CAPN13      |
| 4.74E-80  | 0.429383745 | 0.545 | 0.19  | 1.52E-75  | 14 AC078980.1  |
| 4.34E-28  | 0.427767887 | 0.661 | 0.408 | 1.40E-23  | 14 AL355499.2  |
| 2.33E-58  | 0.426622299 | 0.684 | 0.327 | 7.49E-54  | 14 CYB5A       |
| 4.95E-42  | 0.425974299 | 0.917 | 0.612 | 1.59E-37  | 14 SULT1C2     |
| 2.77E-43  | 0.425372973 | 0.369 | 0.15  | 8.88E-39  | 14 CCDC60      |
| 1.56E-32  | 0.424466505 | 0.399 | 0.19  | 5.02E-28  | 14 MIR646HG    |
| 4.24E-55  | 0.424452185 | 0.704 | 0.359 | 1.36E-50  | 14 RIC8B       |
| 9.44E-41  | 0.423370147 | 0.767 | 0.456 | 3.03E-36  | 14 FRK         |
| 3.15E-160 | 0.422623118 | 0.362 | 0.063 | 1.01E-155 | 14 DUSP9       |
| 8.91E-46  | 0.4224666   | 0.815 | 0.464 | 2.86E-41  | 14 SSBP2       |
| 1.39E-69  | 0.421773233 | 0.614 | 0.265 | 4.47E-65  | 14 XPA         |
| 4.34E-37  | 0.421137858 | 0.298 | 0.117 | 1.39E-32  | 14 NEK10       |
| 2.17E-100 | 0.421011587 | 0.317 | 0.071 | 6.98E-96  | 14 JAM2        |
| 2.28E-62  | 0.420791475 | 0.589 | 0.267 | 7.33E-58  | 14 AC138393.1  |
| 3.87E-50  | 0.419945432 | 0.586 | 0.284 | 1.24E-45  | 14 ANP32AP1    |
| 2.49E-94  | 0.419617935 | 0.508 | 0.168 | 7.99E-90  | 14 GUSBP15     |
| 1.43E-45  | 0.419299754 | 0.679 | 0.368 | 4.59E-41  | 14 SMIM8       |
| 4.38E-108 | 0.419271862 | 0.335 | 0.075 | 1.41E-103 | 14 IFITM10     |
| 2.57E-60  | 0.418756097 | 0.661 | 0.313 | 8.26E-56  | 14 KLF9        |
| 6.46E-47  | 0.418137898 | 0.757 | 0.419 | 2.07E-42  | 14 SLX4IP      |
| 3.71E-84  | 0.417712703 | 0.467 | 0.154 | 1.19E-79  | 14 LINC00958   |
| 1.43E-50  | 0.417178106 | 0.674 | 0.355 | 4.60E-46  | 14 DECR1       |
| 9.58E-65  | 0.416047411 | 0.681 | 0.32  | 3.08E-60  | 14 LRP6        |



|           |             |       |       |           |               |
|-----------|-------------|-------|-------|-----------|---------------|
| 3.51E-62  | 0.415910955 | 0.541 | 0.22  | 1.13E-57  | 14 PRDM16-DT  |
| 6.78E-35  | 0.415762401 | 0.407 | 0.195 | 2.18E-30  | 14 TUFT1      |
| 1.04E-49  | 0.415556146 | 0.376 | 0.146 | 3.34E-45  | 14 NEGR1      |
| 2.84E-56  | 0.414700261 | 0.466 | 0.191 | 9.11E-52  | 14 CIT        |
| 6.11E-23  | 0.414649412 | 0.354 | 0.186 | 1.96E-18  | 14 TAFA1      |
| 3.01E-71  | 0.41449581  | 0.374 | 0.118 | 9.65E-67  | 14 TMEM45B    |
| 5.75E-38  | 0.414202169 | 0.797 | 0.476 | 1.85E-33  | 14 GALNT18    |
| 4.17E-47  | 0.413351524 | 0.688 | 0.37  | 1.34E-42  | 14 AKAP6      |
| 2.33E-30  | 0.412580965 | 0.981 | 0.88  | 7.49E-26  | 14 WWOX       |
| 3.53E-59  | 0.412455    | 0.638 | 0.274 | 1.13E-54  | 14 CA10       |
| 2.55E-43  | 0.412109083 | 0.76  | 0.457 | 8.19E-39  | 14 GPATCH2L   |
| 4.94E-41  | 0.411322492 | 0.534 | 0.267 | 1.59E-36  | 14 EPM2A      |
| 8.78E-74  | 0.409641257 | 0.623 | 0.259 | 2.82E-69  | 14 SGK2       |
| 2.88E-59  | 0.409015855 | 0.268 | 0.077 | 9.25E-55  | 14 CRACDL     |
| 3.75E-67  | 0.408487328 | 0.397 | 0.136 | 1.20E-62  | 14 SMCO4      |
| 5.69E-42  | 0.408173899 | 0.794 | 0.475 | 1.83E-37  | 14 STRBP      |
| 3.89E-36  | 0.408155633 | 0.989 | 0.797 | 1.25E-31  | 14 SOX6       |
| 2.04E-27  | 0.407739243 | 0.781 | 0.51  | 6.55E-23  | 14 MAN1A1     |
| 1.66E-62  | 0.40706903  | 0.728 | 0.355 | 5.33E-58  | 14 GOT1       |
| 1.49E-72  | 0.406350896 | 0.446 | 0.156 | 4.80E-68  | 14 SLC6A16    |
| 3.26E-57  | 0.406001326 | 0.711 | 0.36  | 1.05E-52  | 14 BCL2L14    |
| 1.45E-80  | 0.405503561 | 0.48  | 0.166 | 4.67E-76  | 14 AC007637.1 |
| 2.37E-51  | 0.405502496 | 0.58  | 0.281 | 7.63E-47  | 14 LARS2      |
| 6.54E-40  | 0.4037762   | 0.785 | 0.477 | 2.10E-35  | 14 USP45      |
| 8.60E-35  | 0.402870305 | 0.956 | 0.699 | 2.76E-30  | 14 VWAS       |
| 3.29E-64  | 0.402114424 | 0.425 | 0.154 | 1.06E-59  | 14 KCNAB1     |
| 6.96E-59  | 0.401699123 | 0.587 | 0.264 | 2.23E-54  | 14 GSTO2      |
| 1.10E-29  | 0.401421056 | 0.437 | 0.227 | 3.53E-25  | 14 LNC-LBCS   |
| 1.93E-59  | 0.400826327 | 0.587 | 0.263 | 6.18E-55  | 14 DTWD1      |
| 5.23E-56  | 0.40081596  | 0.61  | 0.278 | 1.68E-51  | 14 FAM227B    |
| 4.16E-55  | 0.399996389 | 0.584 | 0.275 | 1.34E-50  | 14 LETMD1     |
| 6.87E-36  | 0.399994003 | 0.459 | 0.224 | 2.21E-31  | 14 AL359710.1 |
| 3.49E-28  | 0.398858797 | 0.66  | 0.402 | 1.12E-23  | 14 DPH6-DT    |
| 1.62E-47  | 0.398790525 | 0.772 | 0.448 | 5.19E-43  | 14 SRSF10     |
| 1.84E-119 | 0.398698499 | 0.319 | 0.063 | 5.90E-115 | 14 LINC02437  |
| 1.62E-43  | 0.398694713 | 0.769 | 0.443 | 5.21E-39  | 14 NFYC       |
| 2.71E-32  | 0.396113926 | 0.914 | 0.66  | 8.70E-28  | 14 RASA1      |
| 5.04E-41  | 0.395552911 | 0.51  | 0.246 | 1.62E-36  | 14 MARK1      |
| 2.74E-28  | 0.394636582 | 0.596 | 0.351 | 8.79E-24  | 14 RNLS       |
| 2.67E-33  | 0.393084761 | 0.811 | 0.528 | 8.57E-29  | 14 VGLL4      |
| 3.01E-37  | 0.392902614 | 0.429 | 0.202 | 9.68E-33  | 14 LEKR1      |
| 7.15E-26  | 0.390345627 | 0.319 | 0.154 | 2.30E-21  | 14 STEAP2-AS1 |
| 4.94E-51  | 0.390309047 | 0.686 | 0.349 | 1.59E-46  | 14 PPP1R13B   |
| 2.28E-46  | 0.390227751 | 0.582 | 0.291 | 7.33E-42  | 14 ATP6V0E1   |
| 4.15E-83  | 0.389109274 | 0.552 | 0.202 | 1.33E-78  | 14 NAIPP2     |
| 7.41E-80  | 0.388897293 | 0.25  | 0.056 | 2.38E-75  | 14 PLXNA4     |
| 8.61E-62  | 0.388712232 | 0.273 | 0.078 | 2.77E-57  | 14 COL14A1    |
| 8.90E-58  | 0.388647128 | 0.473 | 0.191 | 2.86E-53  | 14 SVOPL      |
| 7.54E-33  | 0.388323739 | 0.545 | 0.289 | 2.42E-28  | 14 PBX3       |
| 3.01E-50  | 0.387770733 | 0.427 | 0.174 | 9.67E-46  | 14 RPL34-DT   |
| 2.84E-69  | 0.387557644 | 0.695 | 0.311 | 9.13E-65  | 14 DNASE1     |

|          |             |       |       |          |               |
|----------|-------------|-------|-------|----------|---------------|
| 7.91E-49 | 0.387218602 | 0.755 | 0.413 | 2.54E-44 | 14 TBC1D8     |
| 1.45E-37 | 0.386228446 | 0.767 | 0.464 | 4.67E-33 | 14 ZMYND8     |
| 1.87E-37 | 0.385746004 | 0.829 | 0.527 | 6.00E-33 | 14 NINL       |
| 5.53E-44 | 0.383718585 | 0.723 | 0.408 | 1.77E-39 | 14 ZNF277     |
| 1.74E-46 | 0.382821855 | 0.755 | 0.435 | 5.58E-42 | 14 SF1        |
| 1.95E-69 | 0.382429107 | 0.476 | 0.173 | 6.27E-65 | 14 ESRP1      |
| 3.77E-40 | 0.381391919 | 0.665 | 0.372 | 1.21E-35 | 14 MIER1      |
| 3.56E-53 | 0.379822963 | 0.797 | 0.44  | 1.14E-48 | 14 TTC14      |
| 1.00E-29 | 0.379749975 | 0.836 | 0.568 | 3.23E-25 | 14 CNKSR3     |
| 4.91E-29 | 0.378548501 | 0.882 | 0.609 | 1.58E-24 | 14 MNAT1      |
| 1.99E-31 | 0.378504444 | 0.578 | 0.328 | 6.40E-27 | 14 PLS3       |
| 4.97E-48 | 0.378444165 | 0.818 | 0.454 | 1.60E-43 | 14 TOM1L2     |
| 3.63E-84 | 0.378081026 | 0.365 | 0.102 | 1.17E-79 | 14 STOX1      |
| 2.26E-43 | 0.377960747 | 0.693 | 0.365 | 7.27E-39 | 14 ARNT2      |
| 6.15E-99 | 0.377613928 | 0.582 | 0.194 | 1.98E-94 | 14 TMEM72     |
| 9.72E-37 | 0.37721038  | 0.503 | 0.254 | 3.12E-32 | 14 PRRG1      |
| 3.58E-58 | 0.377075625 | 0.39  | 0.141 | 1.15E-53 | 14 LINC00240  |
| 6.66E-41 | 0.37688024  | 0.466 | 0.215 | 2.14E-36 | 14 NLGN4Y     |
| 1.29E-37 | 0.376661916 | 0.801 | 0.488 | 4.14E-33 | 14 SIL1       |
| 1.18E-44 | 0.375379527 | 0.693 | 0.373 | 3.78E-40 | 14 UQCRC2     |
| 1.69E-21 | 0.374060958 | 0.635 | 0.416 | 5.42E-17 | 14 GHR        |
| 9.56E-36 | 0.373353394 | 0.785 | 0.48  | 3.07E-31 | 14 MTX2       |
| 5.19E-52 | 0.373247459 | 0.637 | 0.31  | 1.67E-47 | 14 RAB30-DT   |
| 5.59E-50 | 0.372422747 | 0.693 | 0.356 | 1.80E-45 | 14 CHKA       |
| 6.73E-63 | 0.372130393 | 0.538 | 0.221 | 2.16E-58 | 14 TFEB       |
| 2.43E-32 | 0.371842092 | 0.503 | 0.259 | 7.79E-28 | 14 LINC01266  |
| 5.36E-37 | 0.371203173 | 0.69  | 0.388 | 1.72E-32 | 14 ZDHHC14    |
| 7.75E-33 | 0.370694435 | 0.878 | 0.568 | 2.49E-28 | 14 FAM160A1   |
| 1.44E-41 | 0.369684388 | 0.66  | 0.358 | 4.62E-37 | 14 IFRD1      |
| 3.90E-32 | 0.36965023  | 0.866 | 0.588 | 1.25E-27 | 14 LYPLAL1    |
| 2.42E-54 | 0.369630299 | 0.605 | 0.279 | 7.77E-50 | 14 TRMT9B     |
| 4.84E-43 | 0.369392477 | 0.718 | 0.386 | 1.55E-38 | 14 SLC3A1     |
| 2.65E-32 | 0.368718542 | 0.834 | 0.543 | 8.50E-28 | 14 DAPK1      |
| 3.10E-49 | 0.368644152 | 0.402 | 0.16  | 9.97E-45 | 14 PCDHA1     |
| 7.20E-41 | 0.368472479 | 0.321 | 0.125 | 2.31E-36 | 14 AC007161.3 |
| 2.19E-12 | 0.368362503 | 0.307 | 0.189 | 7.04E-08 | 14 FOXP2      |
| 1.78E-40 | 0.368268302 | 0.713 | 0.4   | 5.71E-36 | 14 LINC00271  |
| 4.51E-47 | 0.368131015 | 0.501 | 0.236 | 1.45E-42 | 14 NHLRC3     |
| 1.34E-77 | 0.368088491 | 0.316 | 0.084 | 4.30E-73 | 14 AC016526.1 |
| 8.47E-23 | 0.367721487 | 0.933 | 0.68  | 2.72E-18 | 14 KAZN       |
| 1.18E-50 | 0.367183919 | 0.727 | 0.39  | 3.78E-46 | 14 RNF10      |
| 7.98E-39 | 0.366655606 | 0.714 | 0.408 | 2.56E-34 | 14 WARS2-AS1  |
| 6.96E-30 | 0.366392773 | 0.815 | 0.53  | 2.24E-25 | 14 MRPL33     |
| 9.39E-38 | 0.365278376 | 0.608 | 0.329 | 3.02E-33 | 14 GLUD1      |
| 4.70E-52 | 0.36518547  | 0.707 | 0.368 | 1.51E-47 | 14 ARHGAP26   |
| 5.61E-27 | 0.364735653 | 0.884 | 0.627 | 1.80E-22 | 14 LRCH1      |
| 1.26E-33 | 0.364728671 | 0.974 | 0.778 | 4.06E-29 | 14 MYO9A      |
| 3.39E-34 | 0.364583098 | 0.785 | 0.481 | 1.09E-29 | 14 SHLD2      |
| 1.31E-67 | 0.364181895 | 0.277 | 0.074 | 4.22E-63 | 14 CRB1       |
| 1.55E-25 | 0.364109781 | 0.921 | 0.645 | 4.99E-21 | 14 NFIB       |
| 1.31E-41 | 0.364040248 | 0.46  | 0.218 | 4.21E-37 | 14 FAM199X    |

|           |             |       |       |           |                 |
|-----------|-------------|-------|-------|-----------|-----------------|
| 8.22E-60  | 0.362642139 | 0.531 | 0.215 | 2.64E-55  | 14 SPAG17       |
| 1.15E-41  | 0.362247013 | 0.386 | 0.165 | 3.69E-37  | 14 FTCDNL1      |
| 1.99E-32  | 0.362003091 | 0.882 | 0.594 | 6.38E-28  | 14 TENT2        |
| 6.02E-28  | 0.361718998 | 0.7   | 0.43  | 1.93E-23  | 14 AL078459.1   |
| 3.84E-48  | 0.361700692 | 0.732 | 0.39  | 1.23E-43  | 14 PCNX2        |
| 1.38E-38  | 0.361543037 | 0.813 | 0.494 | 4.42E-34  | 14 PSME4        |
| 6.21E-34  | 0.360948243 | 0.866 | 0.572 | 2.00E-29  | 14 SPIN1        |
| 6.60E-75  | 0.360837255 | 0.367 | 0.112 | 2.12E-70  | 14 TMED7-TICAM2 |
| 3.86E-27  | 0.360311358 | 0.866 | 0.594 | 1.24E-22  | 14 CTBP2        |
| 6.38E-30  | 0.359194384 | 0.811 | 0.523 | 2.05E-25  | 14 AF117829.1   |
| 1.00E-38  | 0.359177413 | 0.748 | 0.44  | 3.22E-34  | 14 PREPL        |
| 6.58E-38  | 0.35903604  | 0.653 | 0.359 | 2.11E-33  | 14 NTN4         |
| 2.25E-44  | 0.358629892 | 0.697 | 0.375 | 7.24E-40  | 14 IMMPL        |
| 1.03E-69  | 0.358584897 | 0.457 | 0.166 | 3.29E-65  | 14 ACYP1        |
| 3.77E-55  | 0.3585743   | 0.61  | 0.288 | 1.21E-50  | 14 WDR91        |
| 1.78E-46  | 0.358308239 | 0.683 | 0.358 | 5.71E-42  | 14 ANXA11       |
| 7.36E-88  | 0.357632131 | 0.526 | 0.173 | 2.36E-83  | 14 F11-AS1      |
| 1.21E-52  | 0.357052498 | 0.829 | 0.433 | 3.88E-48  | 14 PRDM16       |
| 4.21E-25  | 0.356639932 | 0.961 | 0.759 | 1.35E-20  | 14 KIAA1217     |
| 6.99E-49  | 0.355776087 | 0.663 | 0.34  | 2.25E-44  | 14 ACVR1B       |
| 5.32E-11  | 0.354622039 | 0.314 | 0.19  | 1.71E-06  | 14 MIR222HG     |
| 1.09E-39  | 0.354215578 | 0.257 | 0.09  | 3.49E-35  | 14 DOK5         |
| 6.80E-116 | 0.354042905 | 0.351 | 0.077 | 2.19E-111 | 14 SLC25A4      |
| 2.96E-42  | 0.353966489 | 0.434 | 0.195 | 9.50E-38  | 14 MBNL3        |
| 1.31E-83  | 0.353082058 | 0.293 | 0.071 | 4.20E-79  | 14 GSTM5        |
| 2.22E-24  | 0.352744125 | 0.804 | 0.55  | 7.12E-20  | 14 AEBP2        |
| 7.71E-20  | 0.352358426 | 0.751 | 0.527 | 2.48E-15  | 14 MAML3        |
| 5.58E-51  | 0.350304279 | 0.67  | 0.331 | 1.79E-46  | 14 ZNF532       |
| 4.62E-34  | 0.349889962 | 0.813 | 0.523 | 1.48E-29  | 14 TDRD3        |
| 1.38E-49  | 0.349447678 | 0.467 | 0.202 | 4.42E-45  | 14 CD47         |
| 1.79E-27  | 0.349253327 | 0.72  | 0.454 | 5.73E-23  | 14 PCGF5        |
| 6.09E-40  | 0.348891398 | 0.818 | 0.476 | 1.95E-35  | 14 GNG12-AS1    |
| 7.31E-28  | 0.347608816 | 0.787 | 0.52  | 2.35E-23  | 14 GRAMD2B      |
| 3.84E-26  | 0.34643466  | 0.591 | 0.351 | 1.23E-21  | 14 SCML1        |
| 5.36E-54  | 0.346425138 | 0.28  | 0.085 | 1.72E-49  | 14 EYA1         |
| 1.36E-46  | 0.346331887 | 0.7   | 0.37  | 4.35E-42  | 14 MAMDC2       |
| 1.11E-28  | 0.34597721  | 0.409 | 0.203 | 3.58E-24  | 14 AC004870.4   |
| 8.92E-57  | 0.34513891  | 0.413 | 0.157 | 2.87E-52  | 14 SSR3         |
| 1.81E-45  | 0.34505977  | 0.667 | 0.345 | 5.83E-41  | 14 GABPB1-AS1   |
| 1.33E-30  | 0.344877459 | 0.804 | 0.506 | 4.26E-26  | 14 DENND1B      |
| 1.13E-53  | 0.344820418 | 0.608 | 0.284 | 3.62E-49  | 14 ADHFE1       |
| 1.28E-56  | 0.344528428 | 0.474 | 0.192 | 4.12E-52  | 14 EPN1         |
| 9.38E-39  | 0.344321012 | 0.785 | 0.467 | 3.01E-34  | 14 DMTF1        |
| 4.52E-32  | 0.344201312 | 0.728 | 0.445 | 1.45E-27  | 14 AP2B1        |
| 4.74E-52  | 0.344053541 | 0.381 | 0.145 | 1.52E-47  | 14 DLG3         |
| 5.19E-44  | 0.343572534 | 0.466 | 0.203 | 1.67E-39  | 14 MAOA         |
| 1.55E-54  | 0.343345021 | 0.48  | 0.197 | 4.96E-50  | 14 GOLM1        |
| 2.28E-44  | 0.343061614 | 0.601 | 0.301 | 7.31E-40  | 14 CYS1         |
| 1.45E-35  | 0.342764066 | 0.623 | 0.333 | 4.66E-31  | 14 FREM2        |
| 1.03E-54  | 0.341240183 | 0.407 | 0.156 | 3.30E-50  | 14 AL158066.1   |
| 3.50E-44  | 0.341120066 | 0.578 | 0.291 | 1.12E-39  | 14 ETFDH        |

|          |             |       |       |          |                |
|----------|-------------|-------|-------|----------|----------------|
| 2.02E-60 | 0.340396947 | 0.293 | 0.087 | 6.49E-56 | 14 LTBP2       |
| 2.78E-48 | 0.339492771 | 0.511 | 0.229 | 8.94E-44 | 14 STK17A      |
| 1.29E-69 | 0.339456205 | 0.303 | 0.085 | 4.14E-65 | 14 MTMR7       |
| 1.08E-25 | 0.339261768 | 0.901 | 0.62  | 3.47E-21 | 14 ANKRD28     |
| 1.62E-38 | 0.337668382 | 0.64  | 0.356 | 5.21E-34 | 14 STAM2       |
| 3.16E-83 | 0.337604227 | 0.284 | 0.067 | 1.02E-78 | 14 PBX4        |
| 6.05E-26 | 0.337489819 | 0.67  | 0.417 | 1.94E-21 | 14 ERICH1      |
| 1.66E-69 | 0.336464819 | 0.353 | 0.109 | 5.34E-65 | 14 ZNF682      |
| 4.97E-31 | 0.335439252 | 0.688 | 0.411 | 1.60E-26 | 14 LINC01362   |
| 2.78E-46 | 0.334990196 | 0.799 | 0.426 | 8.94E-42 | 14 OSBPL10     |
| 2.12E-29 | 0.334545215 | 0.81  | 0.512 | 6.79E-25 | 14 AC068205.2  |
| 1.42E-52 | 0.3334447   | 0.388 | 0.148 | 4.55E-48 | 14 AL137058.2  |
| 9.08E-40 | 0.333343776 | 0.54  | 0.271 | 2.92E-35 | 14 CDKL5       |
| 2.28E-35 | 0.333323589 | 0.822 | 0.516 | 7.33E-31 | 14 DICER1      |
| 4.51E-78 | 0.332997982 | 0.379 | 0.114 | 1.45E-73 | 14 PRXL2A      |
| 1.82E-37 | 0.332975361 | 0.952 | 0.695 | 5.86E-33 | 14 APBB2       |
| 1.18E-38 | 0.332689889 | 0.526 | 0.268 | 3.79E-34 | 14 ZNF736      |
| 3.89E-40 | 0.332118507 | 0.995 | 0.827 | 1.25E-35 | 14 PTPRG       |
| 5.58E-37 | 0.330947135 | 0.714 | 0.405 | 1.79E-32 | 14 NDUFS4      |
| 1.70E-40 | 0.330002891 | 0.302 | 0.113 | 5.47E-36 | 14 AL355499.1  |
| 6.27E-33 | 0.329961893 | 0.984 | 0.711 | 2.01E-28 | 14 ADAMTS9-AS2 |
| 4.52E-48 | 0.32968704  | 0.506 | 0.235 | 1.45E-43 | 14 GTF2H2C     |
| 8.53E-39 | 0.329269734 | 0.563 | 0.287 | 2.74E-34 | 14 BDNF-AS     |
| 1.64E-43 | 0.328470835 | 0.67  | 0.354 | 5.26E-39 | 14 SPPL2A      |
| 2.11E-45 | 0.327567198 | 0.501 | 0.224 | 6.78E-41 | 14 RNF24       |
| 2.35E-62 | 0.327504174 | 0.741 | 0.366 | 7.54E-58 | 14 TGFB2       |
| 1.08E-16 | 0.327472581 | 0.487 | 0.301 | 3.48E-12 | 14 ALCAM       |
| 1.83E-40 | 0.327187203 | 0.631 | 0.343 | 5.88E-36 | 14 ATP5F1C     |
| 1.61E-57 | 0.327035352 | 0.388 | 0.142 | 5.17E-53 | 14 GLRX        |
| 3.89E-37 | 0.32688539  | 0.549 | 0.284 | 1.25E-32 | 14 COX10       |
| 2.00E-33 | 0.326475357 | 0.681 | 0.397 | 6.42E-29 | 14 URI1        |
| 5.11E-86 | 0.326077894 | 0.416 | 0.124 | 1.64E-81 | 14 PGAP6       |
| 4.99E-23 | 0.325108268 | 0.998 | 0.874 | 1.60E-18 | 14 AL136164.2  |
| 2.74E-33 | 0.324262464 | 0.513 | 0.269 | 8.79E-29 | 14 LINC00472   |
| 1.10E-37 | 0.324209326 | 0.54  | 0.277 | 3.53E-33 | 14 SORT1       |
| 2.52E-43 | 0.323790206 | 0.575 | 0.281 | 8.08E-39 | 14 PIP5K1B     |
| 1.08E-39 | 0.32336493  | 0.764 | 0.439 | 3.46E-35 | 14 AC132008.2  |
| 7.78E-45 | 0.322573193 | 0.395 | 0.159 | 2.50E-40 | 14 IRS1        |
| 6.47E-45 | 0.322401831 | 0.76  | 0.413 | 2.08E-40 | 14 KCNQ1       |
| 3.29E-53 | 0.321588671 | 0.686 | 0.34  | 1.06E-48 | 14 GPI         |
| 5.13E-63 | 0.321542986 | 0.354 | 0.115 | 1.65E-58 | 14 SLC12A8     |
| 1.51E-46 | 0.320363866 | 0.333 | 0.124 | 4.85E-42 | 14 MFAP3L      |
| 4.85E-39 | 0.320060135 | 0.372 | 0.158 | 1.56E-34 | 14 KCNK1       |
| 4.81E-52 | 0.31950444  | 0.467 | 0.195 | 1.54E-47 | 14 TBC1D24     |
| 3.11E-33 | 0.31937174  | 0.704 | 0.424 | 9.99E-29 | 14 DNML        |
| 3.89E-44 | 0.31864937  | 0.506 | 0.233 | 1.25E-39 | 14 IDH2        |
| 4.22E-29 | 0.318385773 | 0.73  | 0.469 | 1.36E-24 | 14 HMGB1       |
| 7.53E-88 | 0.318215645 | 0.33  | 0.084 | 2.42E-83 | 14 AC004982.2  |
| 6.15E-56 | 0.318097849 | 0.771 | 0.406 | 1.97E-51 | 14 ITGA2       |
| 6.18E-48 | 0.317206214 | 0.474 | 0.206 | 1.98E-43 | 14 HPRT1       |
| 3.07E-28 | 0.316682601 | 0.813 | 0.529 | 9.86E-24 | 14 PLCXD2      |

|          |             |       |       |          |               |
|----------|-------------|-------|-------|----------|---------------|
| 5.19E-33 | 0.316467814 | 0.831 | 0.525 | 1.67E-28 | 14 TRA2A      |
| 3.76E-67 | 0.314551247 | 0.332 | 0.1   | 1.21E-62 | 14 FECH       |
| 1.77E-60 | 0.314206109 | 0.559 | 0.237 | 5.70E-56 | 14 PLIN5      |
| 1.33E-37 | 0.313336144 | 0.878 | 0.564 | 4.27E-33 | 14 CFLAR      |
| 2.12E-62 | 0.313133397 | 0.552 | 0.229 | 6.81E-58 | 14 PXN        |
| 1.07E-47 | 0.312778936 | 0.443 | 0.188 | 3.45E-43 | 14 AL160269.1 |
| 2.29E-39 | 0.312547643 | 0.55  | 0.273 | 7.35E-35 | 14 ANKRD6     |
| 9.39E-34 | 0.312521091 | 0.746 | 0.443 | 3.01E-29 | 14 TFCP2      |
| 2.60E-40 | 0.312437346 | 0.587 | 0.297 | 8.35E-36 | 14 VAX2       |
| 8.69E-56 | 0.312369776 | 0.39  | 0.146 | 2.79E-51 | 14 SEPTIN7P9  |
| 3.69E-67 | 0.311813071 | 0.27  | 0.072 | 1.19E-62 | 14 SETD7      |
| 5.38E-55 | 0.311463219 | 0.459 | 0.185 | 1.73E-50 | 14 DAG1       |
| 1.85E-46 | 0.311039273 | 0.388 | 0.158 | 5.96E-42 | 14 PROSER1    |
| 8.85E-45 | 0.310909726 | 0.635 | 0.323 | 2.84E-40 | 14 FAM126B    |
| 3.56E-57 | 0.310288932 | 0.423 | 0.163 | 1.14E-52 | 14 CLN5       |
| 6.47E-49 | 0.310084917 | 0.328 | 0.118 | 2.08E-44 | 14 DEUP1      |
| 1.61E-31 | 0.30911937  | 0.855 | 0.55  | 5.17E-27 | 14 PCMTD1     |
| 2.78E-27 | 0.308903608 | 0.48  | 0.256 | 8.93E-23 | 14 CTNNAL1    |
| 6.99E-40 | 0.308455734 | 0.753 | 0.442 | 2.24E-35 | 14 LRRC37A4P  |
| 7.02E-42 | 0.308309384 | 0.34  | 0.133 | 2.26E-37 | 14 WDR17      |
| 7.11E-38 | 0.307929069 | 0.409 | 0.18  | 2.28E-33 | 14 AP002518.2 |
| 3.18E-17 | 0.307534138 | 0.933 | 0.738 | 1.02E-12 | 14 MBNL1      |
| 3.27E-43 | 0.307284232 | 0.508 | 0.24  | 1.05E-38 | 14 ZNF680     |
| 6.62E-43 | 0.307136367 | 0.621 | 0.299 | 2.13E-38 | 14 NR3C1      |
| 6.48E-34 | 0.30704972  | 0.377 | 0.172 | 2.08E-29 | 14 AC011346.1 |
| 3.19E-27 | 0.306629413 | 0.85  | 0.562 | 1.02E-22 | 14 MARCHF6    |
| 4.27E-46 | 0.305355703 | 0.919 | 0.553 | 1.37E-41 | 14 COL4A3     |
| 1.99E-68 | 0.304741166 | 0.307 | 0.088 | 6.41E-64 | 14 SULT1C3    |
| 2.80E-54 | 0.304332793 | 0.443 | 0.174 | 9.00E-50 | 14 LINC02062  |
| 2.21E-41 | 0.304285176 | 0.675 | 0.356 | 7.10E-37 | 14 NOTCH2     |
| 3.97E-43 | 0.303876689 | 0.455 | 0.203 | 1.27E-38 | 14 MST1P2     |
| 2.88E-32 | 0.302811214 | 0.305 | 0.129 | 9.24E-28 | 14 POT1-AS1   |
| 1.11E-27 | 0.302799221 | 0.705 | 0.442 | 3.58E-23 | 14 STXBP5     |
| 7.10E-32 | 0.302793878 | 0.598 | 0.326 | 2.28E-27 | 14 CFAP221    |
| 1.51E-30 | 0.302526739 | 0.383 | 0.184 | 4.85E-26 | 14 KLHL32     |
| 1.03E-34 | 0.302137005 | 0.578 | 0.307 | 3.29E-30 | 14 MICU3      |
| 2.45E-56 | 0.30102231  | 0.279 | 0.084 | 7.86E-52 | 14 CERKL      |
| 1.57E-36 | 0.300421688 | 0.455 | 0.22  | 5.03E-32 | 14 CPNE3      |
| 1.79E-39 | 0.3002246   | 0.305 | 0.118 | 5.74E-35 | 14 MRPS30-DT  |
| 1.87E-78 | 0.300045223 | 0.36  | 0.103 | 6.02E-74 | 14 SALL1      |
| 4.87E-21 | 0.299975908 | 0.273 | 0.135 | 1.56E-16 | 14 LINC01697  |
| 2.57E-28 | 0.299697085 | 0.727 | 0.45  | 8.26E-24 | 14 ZNF618     |
| 3.38E-27 | 0.299539112 | 0.866 | 0.597 | 1.09E-22 | 14 ZNF518A    |
| 7.16E-34 | 0.298656887 | 0.527 | 0.282 | 2.30E-29 | 14 MYEF2      |
| 2.88E-33 | 0.298500626 | 0.374 | 0.17  | 9.25E-29 | 14 THSD7B     |
| 4.61E-46 | 0.298277148 | 0.45  | 0.191 | 1.48E-41 | 14 RPS6KA5    |
| 4.04E-32 | 0.29791752  | 0.901 | 0.574 | 1.30E-27 | 14 VAV3       |
| 8.61E-58 | 0.297694505 | 0.594 | 0.256 | 2.77E-53 | 14 PLEKHG1    |
| 3.35E-39 | 0.297371101 | 0.582 | 0.297 | 1.08E-34 | 14 ZNRF2P2    |
| 3.98E-34 | 0.297326372 | 0.827 | 0.502 | 1.28E-29 | 14 TANC2      |
| 3.50E-21 | 0.297139938 | 0.921 | 0.685 | 1.12E-16 | 14 NUMB       |

|          |             |       |       |          |               |
|----------|-------------|-------|-------|----------|---------------|
| 5.34E-33 | 0.29713006  | 0.596 | 0.327 | 1.71E-28 | 14 AC046134.2 |
| 8.65E-36 | 0.297117019 | 0.626 | 0.337 | 2.78E-31 | 14 ACSL3      |
| 2.34E-40 | 0.295808497 | 0.534 | 0.268 | 7.50E-36 | 14 PHF8       |
| 2.01E-30 | 0.295541837 | 0.73  | 0.445 | 6.47E-26 | 14 LCLAT1     |
| 2.39E-45 | 0.29546905  | 0.295 | 0.104 | 7.69E-41 | 14 COL5A2     |
| 4.07E-32 | 0.295397747 | 0.422 | 0.206 | 1.31E-27 | 14 LIX1-AS1   |
| 1.54E-39 | 0.294822332 | 0.48  | 0.23  | 4.93E-35 | 14 TOR1AIP2   |
| 2.80E-52 | 0.294487023 | 0.619 | 0.291 | 8.99E-48 | 14 AC138207.8 |
| 1.15E-32 | 0.294407419 | 0.753 | 0.455 | 3.71E-28 | 14 DHX15      |
| 1.01E-49 | 0.293872701 | 0.319 | 0.11  | 3.23E-45 | 14 AC008629.1 |
| 5.46E-54 | 0.29332385  | 0.273 | 0.083 | 1.75E-49 | 14 ST3GAL5    |
| 3.10E-32 | 0.29305643  | 0.831 | 0.521 | 9.96E-28 | 14 IFT88      |
| 9.26E-30 | 0.292778556 | 0.596 | 0.339 | 2.97E-25 | 14 NDFIP1     |
| 2.39E-36 | 0.291970748 | 0.656 | 0.362 | 7.68E-32 | 14 PNPLA8     |
| 6.79E-80 | 0.291933174 | 0.303 | 0.076 | 2.18E-75 | 14 PP7080     |
| 1.78E-30 | 0.291884381 | 0.254 | 0.099 | 5.70E-26 | 14 LINC01055  |
| 2.40E-25 | 0.291775883 | 0.871 | 0.611 | 7.71E-21 | 14 DPH6       |
| 1.07E-24 | 0.291420774 | 0.556 | 0.325 | 3.45E-20 | 14 AC009690.2 |
| 2.41E-61 | 0.29116286  | 0.293 | 0.086 | 7.73E-57 | 14 AL159163.1 |
| 1.25E-27 | 0.291107963 | 0.989 | 0.792 | 4.00E-23 | 14 MAML2      |
| 5.43E-35 | 0.290989944 | 0.792 | 0.474 | 1.74E-30 | 14 PAPOLA     |
| 2.94E-37 | 0.290511639 | 0.557 | 0.288 | 9.44E-33 | 14 GTF2H2B    |
| 4.09E-34 | 0.290229397 | 0.72  | 0.422 | 1.31E-29 | 14 FRS2       |
| 1.99E-35 | 0.289937644 | 0.448 | 0.218 | 6.40E-31 | 14 TXNRD1     |
| 7.09E-39 | 0.289631294 | 0.691 | 0.389 | 2.28E-34 | 14 AC015813.2 |
| 2.87E-41 | 0.289333656 | 0.649 | 0.332 | 9.21E-37 | 14 AL139807.1 |
| 2.41E-37 | 0.289234777 | 0.506 | 0.255 | 7.75E-33 | 14 TFB1M      |
| 3.68E-31 | 0.289085873 | 0.538 | 0.296 | 1.18E-26 | 14 ARFGAP3    |
| 1.27E-50 | 0.289068364 | 0.3   | 0.101 | 4.07E-46 | 14 NAAA       |
| 2.99E-24 | 0.287731915 | 0.891 | 0.581 | 9.62E-20 | 14 TRHDE      |
| 3.77E-51 | 0.287671884 | 0.319 | 0.11  | 1.21E-46 | 14 THBS4      |
| 9.27E-34 | 0.287581052 | 0.817 | 0.509 | 2.98E-29 | 14 LLGL2      |
| 2.31E-63 | 0.287561305 | 0.266 | 0.072 | 7.42E-59 | 14 EFHC2      |
| 3.26E-47 | 0.287237909 | 0.519 | 0.234 | 1.05E-42 | 14 ZNF138     |
| 6.16E-56 | 0.286759425 | 0.691 | 0.33  | 1.98E-51 | 14 ST3GAL6    |
| 1.57E-49 | 0.286065344 | 0.323 | 0.115 | 5.06E-45 | 14 TMMEM209   |
| 2.40E-34 | 0.28586332  | 0.683 | 0.386 | 7.70E-30 | 14 BMS1P1     |
| 2.57E-38 | 0.285268541 | 0.612 | 0.321 | 8.25E-34 | 14 PITPNM2    |
| 3.16E-33 | 0.284972327 | 0.455 | 0.226 | 1.02E-28 | 14 OSBP2      |
| 5.97E-32 | 0.284682865 | 0.656 | 0.372 | 1.92E-27 | 14 CDKL1      |
| 5.30E-36 | 0.284170444 | 0.436 | 0.206 | 1.70E-31 | 14 MRPS9      |
| 8.42E-23 | 0.283776999 | 0.37  | 0.195 | 2.70E-18 | 14 LINC00882  |
| 1.95E-29 | 0.283424575 | 0.832 | 0.569 | 6.27E-25 | 14 CRIM1      |
| 1.79E-31 | 0.283285078 | 0.598 | 0.335 | 5.75E-27 | 14 ASPH       |
| 6.56E-38 | 0.283268749 | 0.467 | 0.227 | 2.11E-33 | 14 PEX3       |
| 6.83E-55 | 0.282903309 | 0.254 | 0.074 | 2.19E-50 | 14 EPDR1      |
| 2.25E-18 | 0.282426977 | 0.896 | 0.668 | 7.23E-14 | 14 PDE8A      |
| 3.84E-27 | 0.281070508 | 0.61  | 0.366 | 1.23E-22 | 14 KLHL24     |
| 2.91E-26 | 0.280768134 | 0.774 | 0.492 | 9.35E-22 | 14 CCDC18-AS1 |
| 2.86E-35 | 0.280631204 | 0.679 | 0.385 | 9.19E-31 | 14 AFTPH      |
| 4.20E-40 | 0.280526322 | 0.679 | 0.363 | 1.35E-35 | 14 CCDC66     |

|          |             |       |       |          |                |
|----------|-------------|-------|-------|----------|----------------|
| 3.44E-43 | 0.279642459 | 0.409 | 0.176 | 1.10E-38 | 14 COX11       |
| 1.00E-43 | 0.279195105 | 0.335 | 0.127 | 3.22E-39 | 14 LINC01550   |
| 4.63E-36 | 0.278571559 | 0.67  | 0.372 | 1.49E-31 | 14 CLCN3       |
| 1.30E-25 | 0.278473047 | 0.746 | 0.467 | 4.16E-21 | 14 COBL        |
| 2.96E-28 | 0.278260979 | 0.594 | 0.346 | 9.49E-24 | 14 SUSD6       |
| 1.68E-38 | 0.278081762 | 0.386 | 0.169 | 5.40E-34 | 14 LINC00467   |
| 2.07E-37 | 0.27789439  | 0.61  | 0.326 | 6.65E-33 | 14 MFF         |
| 2.57E-36 | 0.27789361  | 0.4   | 0.182 | 8.25E-32 | 14 CEP120      |
| 1.99E-39 | 0.277542299 | 0.28  | 0.104 | 6.40E-35 | 14 B4GALT6     |
| 3.83E-19 | 0.277385347 | 0.896 | 0.657 | 1.23E-14 | 14 ZCCHC7      |
| 3.77E-85 | 0.276994628 | 0.705 | 0.275 | 1.21E-80 | 14 ADAMTS17    |
| 2.73E-17 | 0.276641217 | 0.656 | 0.432 | 8.76E-13 | 14 KCNJ3       |
| 8.82E-27 | 0.27635001  | 0.679 | 0.416 | 2.83E-22 | 14 R3HDM1      |
| 1.31E-54 | 0.276160722 | 0.374 | 0.136 | 4.20E-50 | 14 AC099811.2  |
| 7.81E-50 | 0.2759515   | 0.397 | 0.156 | 2.51E-45 | 14 AKAP1       |
| 3.30E-31 | 0.275798299 | 0.785 | 0.486 | 1.06E-26 | 14 CLEC16A     |
| 2.19E-23 | 0.275562003 | 0.903 | 0.647 | 7.04E-19 | 14 AP3B1       |
| 9.83E-33 | 0.275200723 | 0.323 | 0.139 | 3.16E-28 | 14 SLC16A5     |
| 1.87E-34 | 0.274948522 | 0.665 | 0.369 | 6.01E-30 | 14 CU633904.1  |
| 5.95E-31 | 0.274829968 | 0.633 | 0.362 | 1.91E-26 | 14 ENSA        |
| 1.72E-36 | 0.274481811 | 0.515 | 0.259 | 5.53E-32 | 14 IMPA2       |
| 1.21E-24 | 0.274421201 | 0.607 | 0.363 | 3.89E-20 | 14 DGKH        |
| 2.38E-44 | 0.273928265 | 0.277 | 0.095 | 7.64E-40 | 14 AC008892.1  |
| 1.55E-16 | 0.273782592 | 0.423 | 0.255 | 4.97E-12 | 14 THEM4       |
| 6.18E-23 | 0.273560628 | 0.998 | 0.891 | 1.98E-18 | 14 RORA        |
| 8.19E-25 | 0.273485934 | 0.392 | 0.206 | 2.63E-20 | 14 RGS5        |
| 5.40E-26 | 0.27334632  | 0.492 | 0.272 | 1.73E-21 | 14 STX18-AS1   |
| 9.29E-28 | 0.27327297  | 0.455 | 0.239 | 2.98E-23 | 14 GDAP1       |
| 5.29E-27 | 0.273195351 | 0.713 | 0.435 | 1.70E-22 | 14 CCDC171     |
| 7.19E-23 | 0.273127203 | 0.758 | 0.492 | 2.31E-18 | 14 MLLT3       |
| 9.11E-30 | 0.272630168 | 0.956 | 0.685 | 2.93E-25 | 14 AGLB4       |
| 5.50E-39 | 0.27200507  | 0.577 | 0.298 | 1.77E-34 | 14 THUMPD3-AS1 |
| 1.38E-15 | 0.271772293 | 0.252 | 0.132 | 4.42E-11 | 14 AC012501.2  |
| 2.44E-25 | 0.271676296 | 0.256 | 0.111 | 7.83E-21 | 14 AC024901.1  |
| 2.54E-32 | 0.271284348 | 0.753 | 0.444 | 8.17E-28 | 14 CPSF6       |
| 1.83E-30 | 0.270971827 | 0.261 | 0.106 | 5.88E-26 | 14 RGS17       |
| 6.73E-28 | 0.270878294 | 0.621 | 0.365 | 2.16E-23 | 14 VRK2        |
| 3.02E-46 | 0.270729632 | 0.349 | 0.134 | 9.69E-42 | 14 ATP1A1-AS1  |
| 2.91E-28 | 0.270610685 | 0.683 | 0.417 | 9.34E-24 | 14 LINC01004   |
| 1.55E-71 | 0.270487022 | 0.277 | 0.071 | 4.98E-67 | 14 ZNF90       |
| 9.07E-18 | 0.269900043 | 0.511 | 0.318 | 2.91E-13 | 14 FGFR2       |
| 8.66E-28 | 0.269750143 | 0.432 | 0.217 | 2.78E-23 | 14 SLC22A2     |
| 1.56E-34 | 0.269599612 | 0.478 | 0.241 | 5.00E-30 | 14 DDAH1       |
| 1.40E-28 | 0.269558087 | 0.649 | 0.381 | 4.49E-24 | 14 CARMIL1     |
| 1.42E-58 | 0.269194692 | 0.395 | 0.136 | 4.55E-54 | 14 CPXM2       |
| 5.10E-28 | 0.269163697 | 0.596 | 0.348 | 1.64E-23 | 14 STAT5B      |
| 3.66E-28 | 0.268846391 | 0.605 | 0.35  | 1.17E-23 | 14 ADGRA3      |
| 1.48E-38 | 0.268457286 | 0.561 | 0.285 | 4.74E-34 | 14 GTF2H2      |
| 1.20E-36 | 0.267607703 | 0.347 | 0.147 | 3.86E-32 | 14 TSPOAP1-AS1 |
| 4.78E-38 | 0.267256604 | 0.714 | 0.396 | 1.54E-33 | 14 MCCC1       |
| 2.70E-14 | 0.266689023 | 0.815 | 0.599 | 8.67E-10 | 14 FOXO1       |

|          |             |       |       |          |               |
|----------|-------------|-------|-------|----------|---------------|
| 5.43E-35 | 0.266664542 | 0.547 | 0.284 | 1.74E-30 | 14 DSTN       |
| 1.91E-32 | 0.266478043 | 0.51  | 0.265 | 6.12E-28 | 14 KAT2B      |
| 1.29E-41 | 0.26625722  | 0.392 | 0.164 | 4.16E-37 | 14 ZNF337-AS1 |
| 6.23E-30 | 0.266045346 | 0.261 | 0.106 | 2.00E-25 | 14 C12orf60   |
| 5.73E-36 | 0.265883182 | 0.626 | 0.345 | 1.84E-31 | 14 ZNF493     |
| 3.62E-35 | 0.26583194  | 0.554 | 0.292 | 1.16E-30 | 14 LINC00174  |
| 1.72E-31 | 0.265705723 | 0.691 | 0.405 | 5.53E-27 | 14 NBPF26     |
| 4.74E-61 | 0.265620865 | 0.298 | 0.088 | 1.52E-56 | 14 AC007325.2 |
| 2.20E-28 | 0.265225705 | 0.797 | 0.512 | 7.08E-24 | 14 UNC13B     |
| 4.16E-34 | 0.265065426 | 0.591 | 0.315 | 1.34E-29 | 14 ETFA       |
| 8.32E-36 | 0.265007116 | 0.464 | 0.227 | 2.67E-31 | 14 EGLN3      |
| 7.46E-47 | 0.264939105 | 0.455 | 0.191 | 2.39E-42 | 14 WLS        |
| 1.90E-29 | 0.264476034 | 0.563 | 0.313 | 6.10E-25 | 14 AC001226.2 |
| 1.63E-37 | 0.264429422 | 0.473 | 0.223 | 5.25E-33 | 14 HHAT       |
| 2.59E-74 | 0.264346396 | 0.298 | 0.078 | 8.32E-70 | 14 SH3D21     |
| 5.17E-26 | 0.263798799 | 0.79  | 0.511 | 1.66E-21 | 14 TAOK3      |
| 8.18E-30 | 0.263434124 | 0.36  | 0.169 | 2.63E-25 | 14 ENTPD3-AS1 |
| 1.39E-31 | 0.263248933 | 0.27  | 0.109 | 4.45E-27 | 14 BAALC-AS1  |
| 2.61E-74 | 0.263116226 | 0.333 | 0.093 | 8.37E-70 | 14 STARD8     |
| 2.24E-62 | 0.263024363 | 0.263 | 0.072 | 7.19E-58 | 14 AC016571.1 |
| 5.54E-30 | 0.262923348 | 0.587 | 0.327 | 1.78E-25 | 14 SLC10A7    |
| 6.58E-35 | 0.262664886 | 0.644 | 0.354 | 2.11E-30 | 14 LINC02256  |
| 1.68E-47 | 0.262660082 | 0.259 | 0.083 | 5.40E-43 | 14 S100A10    |
| 2.32E-49 | 0.262581296 | 0.563 | 0.255 | 7.44E-45 | 14 ZNF559     |
| 5.80E-38 | 0.262478247 | 0.423 | 0.195 | 1.86E-33 | 14 QRSL1      |
| 8.16E-33 | 0.262469583 | 0.451 | 0.223 | 2.62E-28 | 14 RAP1GAP    |
| 1.30E-26 | 0.262334559 | 0.797 | 0.51  | 4.17E-22 | 14 XPO1       |
| 9.94E-29 | 0.262077239 | 0.827 | 0.534 | 3.19E-24 | 14 KIAA0232   |
| 5.72E-56 | 0.261808076 | 0.328 | 0.108 | 1.84E-51 | 14 PTK7       |
| 2.65E-30 | 0.261276694 | 0.323 | 0.144 | 8.52E-26 | 14 ANKRD7     |
| 1.51E-27 | 0.26072589  | 0.48  | 0.259 | 4.84E-23 | 14 TENT4B     |
| 2.94E-28 | 0.260573146 | 0.741 | 0.455 | 9.44E-24 | 14 CCDC50     |
| 4.96E-49 | 0.260350816 | 0.397 | 0.156 | 1.59E-44 | 14 AC245297.1 |
| 1.74E-25 | 0.260184972 | 0.67  | 0.397 | 5.59E-21 | 14 ELL2       |
| 3.50E-34 | 0.260011145 | 0.473 | 0.232 | 1.12E-29 | 14 DNAI4      |
| 1.29E-21 | 0.259920865 | 0.891 | 0.628 | 4.13E-17 | 14 POGZ       |
| 1.37E-27 | 0.259853803 | 0.436 | 0.228 | 4.39E-23 | 14 TMEM123    |
| 6.17E-28 | 0.259763897 | 0.675 | 0.411 | 1.98E-23 | 14 HNRNPD     |
| 6.79E-43 | 0.259249241 | 0.37  | 0.149 | 2.18E-38 | 14 HOMER2     |
| 6.73E-22 | 0.258974707 | 0.663 | 0.42  | 2.16E-17 | 14 ATP2B1     |
| 3.77E-24 | 0.258445964 | 0.698 | 0.447 | 1.21E-19 | 14 ARMCX4     |
| 2.90E-33 | 0.258401833 | 0.642 | 0.351 | 9.31E-29 | 14 PRKCI      |
| 4.80E-20 | 0.257972317 | 0.855 | 0.594 | 1.54E-15 | 14 SUCLG2     |
| 4.30E-37 | 0.257697807 | 0.494 | 0.237 | 1.38E-32 | 14 AC090912.1 |
| 1.90E-32 | 0.257449494 | 0.695 | 0.398 | 6.11E-28 | 14 MYSM1      |
| 1.69E-25 | 0.257235282 | 0.896 | 0.614 | 5.42E-21 | 14 DNAH14     |
| 1.01E-65 | 0.25701574  | 0.446 | 0.159 | 3.25E-61 | 14 OBSL1      |
| 5.49E-43 | 0.2567657   | 0.305 | 0.113 | 1.76E-38 | 14 MARVELD2   |
| 3.00E-28 | 0.256476274 | 0.593 | 0.341 | 9.62E-24 | 14 TRIM24     |
| 1.39E-37 | 0.256359462 | 0.695 | 0.382 | 4.47E-33 | 14 CHASERR    |
| 1.50E-36 | 0.256294817 | 0.404 | 0.181 | 4.82E-32 | 14 AC011447.3 |



|           |             |       |       |           |               |
|-----------|-------------|-------|-------|-----------|---------------|
| 9.24E-39  | 0.255803302 | 0.347 | 0.143 | 2.97E-34  | 14 AL161725.1 |
| 5.28E-21  | 0.255650945 | 0.938 | 0.688 | 1.70E-16  | 14 SENP6      |
| 1.18E-23  | 0.255311768 | 0.556 | 0.33  | 3.79E-19  | 14 TTN-AS1    |
| 5.22E-32  | 0.25529404  | 0.617 | 0.343 | 1.68E-27  | 14 ATAD1      |
| 3.39E-39  | 0.255249879 | 0.513 | 0.25  | 1.09E-34  | 14 MYO5C      |
| 2.14E-23  | 0.254071744 | 0.988 | 0.828 | 6.86E-19  | 14 DDX17      |
| 4.51E-34  | 0.25373793  | 0.39  | 0.179 | 1.45E-29  | 14 FAM162A    |
| 7.17E-33  | 0.253732163 | 0.439 | 0.217 | 2.30E-28  | 14 TMX2       |
| 2.67E-16  | 0.25363116  | 0.979 | 0.794 | 8.57E-12  | 14 SIK3       |
| 1.43E-66  | 0.253461537 | 0.25  | 0.063 | 4.58E-62  | 14 IDH2-DT    |
| 4.06E-37  | 0.253034425 | 0.37  | 0.162 | 1.30E-32  | 14 NUDT21     |
| 3.69E-23  | 0.252724687 | 0.679 | 0.425 | 1.18E-18  | 14 FAM214A    |
| 2.18E-25  | 0.252339027 | 0.436 | 0.233 | 7.01E-21  | 14 B3GLCT     |
| 5.62E-24  | 0.252230465 | 0.332 | 0.163 | 1.81E-19  | 14 AC073475.1 |
| 1.99E-29  | 0.251981561 | 0.508 | 0.271 | 6.38E-25  | 14 FBXW8      |
| 3.14E-42  | 0.251806571 | 0.298 | 0.11  | 1.01E-37  | 14 AKIRIN2    |
| 1.20E-17  | 0.251440585 | 0.952 | 0.726 | 3.85E-13  | 14 ANKRD17    |
| 4.64E-30  | 0.251412966 | 0.668 | 0.389 | 1.49E-25  | 14 GRAMD1C    |
| 6.30E-29  | 0.251354322 | 0.571 | 0.323 | 2.02E-24  | 14 HSD17B4    |
| 7.18E-38  | 0.251341954 | 0.734 | 0.4   | 2.30E-33  | 14 CLCNKA     |
| 1.55E-32  | 0.251243742 | 0.506 | 0.266 | 4.99E-28  | 14 MORF4L2    |
| 7.56E-73  | 0.250902546 | 0.287 | 0.075 | 2.43E-68  | 14 LINC01507  |
| 1.29E-27  | 0.25033891  | 0.799 | 0.489 | 4.14E-23  | 14 NOS1AP     |
| 8.85E-30  | 0.250315542 | 0.751 | 0.463 | 2.84E-25  | 14 CASK       |
| 0         | 5.160203189 | 0.89  | 0.035 | 0         | 15 SLC26A4    |
| 0         | 4.609234423 | 0.995 | 0.108 | 0         | 15 SLC4A9     |
| 0         | 4.559720583 | 0.879 | 0.145 | 0         | 15 CELF2      |
| 0         | 3.993652315 | 0.971 | 0.151 | 0         | 15 AC008438.1 |
| 0         | 3.707603433 | 0.91  | 0.127 | 0         | 15 DGKI       |
| 0         | 3.322001035 | 0.805 | 0.07  | 0         | 15 SLC35F3    |
| 0         | 3.267503415 | 0.969 | 0.404 | 0         | 15 PLCG2      |
| 0         | 3.183131957 | 0.933 | 0.108 | 0         | 15 CA8        |
| 0         | 3.148472938 | 0.957 | 0.26  | 0         | 15 RCAN2      |
| 0         | 3.102015092 | 0.977 | 0.433 | 0         | 15 PACRG      |
| 0         | 3.056337624 | 0.939 | 0.09  | 0         | 15 LINC01187  |
| 0         | 2.990531507 | 0.805 | 0.168 | 0         | 15 ADAMTSL3   |
| 0         | 2.964377181 | 0.986 | 0.598 | 0         | 15 CA12       |
| 0         | 2.867514362 | 0.969 | 0.26  | 0         | 15 PDE1C      |
| 0         | 2.841590362 | 0.798 | 0.085 | 0         | 15 PPM1E      |
| 0         | 2.823640638 | 0.834 | 0.183 | 0         | 15 SEMA3C     |
| 0         | 2.726238305 | 0.922 | 0.229 | 0         | 15 ATP6V0D2   |
| 0         | 2.669180675 | 0.787 | 0.065 | 0         | 15 SAMHD1     |
| 0         | 2.564253767 | 0.951 | 0.408 | 0         | 15 ATP6V0A4   |
| 7.96E-287 | 2.556575688 | 0.937 | 0.426 | 2.56E-282 | 15 EPS8       |
| 8.82E-273 | 2.526419115 | 0.98  | 0.739 | 2.83E-268 | 15 WDR72      |
| 0         | 2.470708997 | 0.394 | 0.014 | 0         | 15 LINC02882  |
| 0         | 2.450581959 | 0.686 | 0.133 | 0         | 15 AL390957.1 |
| 3.21E-277 | 2.430345516 | 0.977 | 0.658 | 1.03E-272 | 15 MAGI3      |
| 0         | 2.42071915  | 0.915 | 0.258 | 0         | 15 SNTB1      |
| 0         | 2.413936147 | 0.977 | 0.163 | 0         | 15 CLNK       |
| 0         | 2.386817461 | 0.859 | 0.214 | 0         | 15 AP002884.2 |

|           |             |       |       |           |               |
|-----------|-------------|-------|-------|-----------|---------------|
| 0         | 2.2891856   | 0.792 | 0.192 | 0         | 15 LRRC9      |
| 0         | 2.260233067 | 0.76  | 0.195 | 0         | 15 DCLK2      |
| 0         | 2.25056988  | 0.747 | 0.086 | 0         | 15 IL18       |
| 4.78E-249 | 2.248983315 | 0.895 | 0.337 | 1.53E-244 | 15 BMPR1B     |
| 7.27E-228 | 2.248933496 | 0.951 | 0.506 | 2.33E-223 | 15 RNF152     |
| 0         | 2.215633878 | 0.765 | 0.107 | 0         | 15 IGFBP5     |
| 1.47E-267 | 2.186410067 | 0.904 | 0.367 | 4.71E-263 | 15 IQGAP2     |
| 3.53E-203 | 2.183118383 | 0.487 | 0.102 | 1.13E-198 | 15 GRM8       |
| 5.96E-290 | 2.171354638 | 1     | 0.882 | 1.92E-285 | 15 MAGI1      |
| 0         | 2.142114011 | 0.8   | 0.178 | 0         | 15 MVB12B     |
| 7.41E-264 | 2.10517991  | 0.764 | 0.211 | 2.38E-259 | 15 ADAMTSL1   |
| 6.32E-178 | 2.090192462 | 0.93  | 0.677 | 2.03E-173 | 15 TFPC2L1    |
| 0         | 2.075621523 | 0.87  | 0.101 | 0         | 15 AC015910.1 |
| 0         | 2.074022677 | 0.603 | 0.067 | 0         | 15 BCO2       |
| 1.89E-134 | 2.006976046 | 0.854 | 0.528 | 6.06E-130 | 15 PLCXD2     |
| 2.58E-234 | 1.973472987 | 0.91  | 0.425 | 8.30E-230 | 15 ITGA6      |
| 4.83E-152 | 1.96182738  | 0.852 | 0.531 | 1.55E-147 | 15 LIMS1      |
| 0         | 1.951039791 | 0.704 | 0.043 | 0         | 15 KRT7       |
| 2.24E-271 | 1.927139539 | 0.83  | 0.247 | 7.19E-267 | 15 PSD3       |
| 2.61E-249 | 1.910160385 | 0.744 | 0.221 | 8.37E-245 | 15 ARSJ       |
| 6.79E-224 | 1.906124237 | 0.751 | 0.249 | 2.18E-219 | 15 TRPC1      |
| 3.10E-190 | 1.903912845 | 0.637 | 0.187 | 9.96E-186 | 15 SDC2       |
| 6.16E-227 | 1.897480569 | 0.955 | 0.564 | 1.98E-222 | 15 NEBL       |
| 5.03E-224 | 1.881842553 | 0.969 | 0.777 | 1.61E-219 | 15 FOXP1      |
| 7.70E-239 | 1.880757662 | 0.984 | 0.814 | 2.47E-234 | 15 NEDD4L     |
| 0         | 1.873873957 | 0.8   | 0.098 | 0         | 15 ATP6V1C2   |
| 1.06E-179 | 1.867103963 | 0.883 | 0.554 | 3.39E-175 | 15 KIF13B     |
| 5.92E-181 | 1.862338247 | 0.81  | 0.403 | 1.90E-176 | 15 PPP2R5A    |
| 2.19E-138 | 1.84629489  | 0.359 | 0.077 | 7.03E-134 | 15 CSMD3      |
| 6.57E-197 | 1.817223791 | 0.883 | 0.432 | 2.11E-192 | 15 NCOA7      |
| 1.46E-170 | 1.800727404 | 0.816 | 0.421 | 4.68E-166 | 15 ATL2       |
| 1.94E-160 | 1.783782139 | 0.875 | 0.551 | 6.25E-156 | 15 PPP3CA     |
| 0         | 1.783555304 | 0.67  | 0.003 | 0         | 15 INSR       |
| 1.29E-282 | 1.776599547 | 0.718 | 0.187 | 4.15E-278 | 15 BCAP29     |
| 5.69E-217 | 1.752709396 | 0.944 | 0.586 | 1.83E-212 | 15 TMEM117    |
| 5.88E-163 | 1.740568973 | 0.933 | 0.736 | 1.89E-158 | 15 PICALM     |
| 8.71E-206 | 1.73076476  | 0.664 | 0.196 | 2.80E-201 | 15 CD9        |
| 2.44E-161 | 1.726915212 | 0.832 | 0.427 | 7.84E-157 | 15 EGFR       |
| 0         | 1.724246484 | 0.659 | 0.061 | 0         | 15 ATP6V1G3   |
| 1.35E-191 | 1.711696673 | 0.818 | 0.348 | 4.34E-187 | 15 SPTLC3     |
| 2.64E-183 | 1.694893002 | 0.906 | 0.549 | 8.48E-179 | 15 FOXN3      |
| 3.61E-152 | 1.678864782 | 0.729 | 0.31  | 1.16E-147 | 15 MBOAT2     |
| 5.16E-164 | 1.646042386 | 0.803 | 0.36  | 1.66E-159 | 15 MYRIP      |
| 0         | 1.63085949  | 0.469 | 0.008 | 0         | 15 SFTA1P     |
| 0         | 1.616355124 | 0.529 | 0.069 | 0         | 15 RTN1       |
| 1.68E-148 | 1.593322068 | 0.903 | 0.597 | 5.38E-144 | 15 FOXO1      |
| 3.83E-142 | 1.587396845 | 0.735 | 0.334 | 1.23E-137 | 15 PLPP3      |
| 8.03E-164 | 1.582087471 | 0.818 | 0.404 | 2.58E-159 | 15 TPD52      |
| 1.85E-142 | 1.581931727 | 0.832 | 0.489 | 5.94E-138 | 15 ASXL1      |
| 0         | 1.565626372 | 0.579 | 0.042 | 0         | 15 HEPACAM2   |
| 3.38E-146 | 1.56518854  | 0.89  | 0.565 | 1.09E-141 | 15 TBC1D4     |

|           |             |       |       |           |              |
|-----------|-------------|-------|-------|-----------|--------------|
| 6.13E-166 | 1.563459841 | 0.751 | 0.332 | 1.97E-161 | 15 SPTLC2    |
| 0         | 1.558778536 | 0.605 | 0.007 | 0         | 15 NTRK1     |
| 7.02E-167 | 1.554971226 | 0.841 | 0.385 | 2.26E-162 | 15 INPP4B    |
| 0         | 1.544969474 | 0.516 | 0.004 | 0         | 15 TLDC2     |
| 5.17E-141 | 1.540979461 | 0.861 | 0.516 | 1.66E-136 | 15 PTBP3     |
| 1.13E-128 | 1.524095566 | 0.798 | 0.475 | 3.62E-124 | 15 HMBOX1    |
| 4.83E-286 | 1.52206701  | 0.61  | 0.114 | 1.55E-281 | 15 NTN1      |
| 5.02E-207 | 1.504217566 | 0.774 | 0.271 | 1.61E-202 | 15 INPP4A    |
| 4.27E-202 | 1.486868632 | 0.612 | 0.154 | 1.37E-197 | 15 LINC01091 |
| 8.75E-92  | 1.479091389 | 0.596 | 0.258 | 2.81E-87  | 15 LAMA2     |
| 2.87E-202 | 1.467232176 | 0.807 | 0.292 | 9.21E-198 | 15 VAX2      |
| 0         | 1.456875974 | 0.523 | 0.057 | 0         | 15 TSPAN8    |
| 7.23E-145 | 1.43627487  | 0.856 | 0.56  | 2.32E-140 | 15 COG5      |
| 1.75E-195 | 1.429024238 | 0.522 | 0.114 | 5.62E-191 | 15 TNFAIP8   |
| 0         | 1.417403661 | 0.374 | 0.031 | 0         | 15 FRMPD4    |
| 7.30E-154 | 1.412328382 | 0.847 | 0.404 | 2.34E-149 | 15 SCIN      |
| 1.52E-162 | 1.409054639 | 0.783 | 0.31  | 4.88E-158 | 15 TMEM213   |
| 4.01E-142 | 1.40804038  | 0.899 | 0.627 | 1.29E-137 | 15 TBC1D1    |
| 0         | 1.396148002 | 0.473 | 0.043 | 0         | 15 GPSM2     |
| 5.66E-98  | 1.395268138 | 0.787 | 0.469 | 1.82E-93  | 15 PCNX4     |
| 5.22E-128 | 1.392330303 | 0.771 | 0.401 | 1.68E-123 | 15 ANXA4     |
| 3.68E-119 | 1.39224935  | 0.892 | 0.65  | 1.18E-114 | 15 PRKCE     |
| 9.85E-245 | 1.377706049 | 0.532 | 0.101 | 3.16E-240 | 15 TIAM1     |
| 4.07E-144 | 1.37490084  | 0.903 | 0.6   | 1.31E-139 | 15 TBL1X     |
| 0         | 1.364210139 | 0.529 | 0.073 | 0         | 15 WFDC2     |
| 2.48E-158 | 1.357870792 | 0.939 | 0.447 | 7.95E-154 | 15 PDZD2     |
| 3.92E-225 | 1.336413423 | 0.606 | 0.151 | 1.26E-220 | 15 GPD1L     |
| 3.08E-81  | 1.324455491 | 0.684 | 0.358 | 9.88E-77  | 15 PPARG     |
| 1.77E-54  | 1.318161451 | 0.715 | 0.484 | 5.67E-50  | 15 MAN2A1    |
| 4.63E-116 | 1.312869084 | 0.829 | 0.524 | 1.49E-111 | 15 USP3      |
| 0         | 1.30333976  | 0.518 | 0.038 | 0         | 15 NEURL1    |
| 1.37E-196 | 1.300067862 | 0.996 | 0.966 | 4.39E-192 | 15 ZBTB20    |
| 1.91E-241 | 1.299323103 | 0.61  | 0.132 | 6.14E-237 | 15 PARVB     |
| 1.33E-178 | 1.295791696 | 0.989 | 0.892 | 4.26E-174 | 15 RORA      |
| 0         | 1.290970832 | 0.505 | 0.036 | 0         | 15 B4GALNT2  |
| 6.37E-132 | 1.290919666 | 0.655 | 0.246 | 2.05E-127 | 15 LITAF     |
| 1.54E-28  | 1.288491901 | 0.271 | 0.123 | 4.96E-24  | 15 DGKB      |
| 2.26E-228 | 1.287987394 | 0.511 | 0.092 | 7.27E-224 | 15 CCBE1     |
| 3.19E-64  | 1.26208934  | 0.713 | 0.432 | 1.03E-59  | 15 PLCL2     |
| 1.29E-124 | 1.244970628 | 0.552 | 0.189 | 4.16E-120 | 15 SVOPL     |
| 1.31E-114 | 1.240448788 | 0.962 | 0.914 | 4.19E-110 | 15 GPHN      |
| 4.71E-228 | 1.235902197 | 0.657 | 0.153 | 1.51E-223 | 15 B3GAT1-DT |
| 2.51E-157 | 1.23539829  | 0.682 | 0.231 | 8.07E-153 | 15 EVA1C     |
| 0         | 1.233771171 | 0.365 | 0.032 | 0         | 15 FOXI1     |
| 1.01E-167 | 1.232271616 | 0.884 | 0.399 | 3.25E-163 | 15 GRB10     |
| 2.31E-104 | 1.226137769 | 0.778 | 0.481 | 7.42E-100 | 15 PRKAA2    |
| 6.80E-95  | 1.218342102 | 0.829 | 0.614 | 2.18E-90  | 15 SPAG9     |
| 2.25E-88  | 1.205063352 | 0.847 | 0.641 | 7.24E-84  | 15 PHLDB2    |
| 4.49E-248 | 1.186427768 | 0.509 | 0.086 | 1.44E-243 | 15 TMEM163   |
| 4.30E-103 | 1.183613985 | 0.444 | 0.134 | 1.38E-98  | 15 CAMK1D    |
| 2.61E-25  | 1.175153333 | 0.469 | 0.301 | 8.40E-21  | 15 LINC02694 |

|           |             |       |       |           |               |
|-----------|-------------|-------|-------|-----------|---------------|
| 1.84E-95  | 1.171566295 | 0.854 | 0.574 | 5.91E-91  | 15 ASAP2      |
| 6.01E-145 | 1.166928209 | 0.464 | 0.116 | 1.93E-140 | 15 PTGFR      |
| 0         | 1.15001844  | 0.43  | 0.006 | 0         | 15 LINC00710  |
| 4.16E-62  | 1.148255979 | 0.688 | 0.398 | 1.34E-57  | 15 MAP3K5     |
| 5.77E-127 | 1.143343207 | 0.469 | 0.131 | 1.85E-122 | 15 LGALS3     |
| 1.28E-98  | 1.140177813 | 0.626 | 0.248 | 4.10E-94  | 15 DOCK8      |
| 1.93E-92  | 1.13573911  | 0.762 | 0.409 | 6.21E-88  | 15 TMEM51     |
| 3.28E-63  | 1.13369289  | 0.619 | 0.348 | 1.05E-58  | 15 ATP10D     |
| 5.30E-111 | 1.132799646 | 0.886 | 0.689 | 1.70E-106 | 15 GNAQ       |
| 4.78E-70  | 1.130743299 | 0.662 | 0.377 | 1.54E-65  | 15 SESTD1     |
| 1.22E-101 | 1.113634895 | 0.727 | 0.379 | 3.92E-97  | 15 CARMIL1    |
| 7.84E-112 | 1.103423448 | 0.735 | 0.321 | 2.52E-107 | 15 SLC22A23   |
| 0         | 1.102568711 | 0.334 | 0.027 | 0         | 15 KCNJ6      |
| 1.64E-141 | 1.100476184 | 0.724 | 0.266 | 5.28E-137 | 15 SEMA5A     |
| 4.79E-107 | 1.096673472 | 0.662 | 0.296 | 1.54E-102 | 15 DAP        |
| 1.55E-104 | 1.095731758 | 0.847 | 0.555 | 4.97E-100 | 15 RALGAPA2   |
| 1.56E-64  | 1.095605408 | 0.865 | 0.735 | 5.00E-60  | 15 MYO6       |
| 3.17E-133 | 1.076607811 | 0.969 | 0.773 | 1.02E-128 | 15 ARL15      |
| 8.76E-154 | 1.075645299 | 0.731 | 0.249 | 2.81E-149 | 15 RHBG       |
| 2.78E-74  | 1.074524073 | 0.776 | 0.487 | 8.93E-70  | 15 MFHAS1     |
| 6.50E-100 | 1.074136796 | 0.439 | 0.136 | 2.09E-95  | 15 LINC01619  |
| 4.14E-101 | 1.072151586 | 0.773 | 0.422 | 1.33E-96  | 15 DTNB       |
| 1.14E-85  | 1.071827463 | 0.724 | 0.4   | 3.65E-81  | 15 UBL3       |
| 1.94E-87  | 1.07172136  | 0.744 | 0.459 | 6.24E-83  | 15 RGPD5      |
| 2.50E-78  | 1.065723029 | 0.724 | 0.418 | 8.03E-74  | 15 ATP6V1A    |
| 5.05E-160 | 1.064586956 | 0.392 | 0.077 | 1.62E-155 | 15 CCDC68     |
| 4.66E-108 | 1.045977847 | 0.659 | 0.278 | 1.50E-103 | 15 TRMT9B     |
| 3.76E-51  | 1.042635491 | 0.596 | 0.355 | 1.21E-46  | 15 TTC39B     |
| 3.07E-133 | 1.041594098 | 0.253 | 0.039 | 9.87E-129 | 15 GRIN2A     |
| 7.19E-100 | 1.023067409 | 0.825 | 0.452 | 2.31E-95  | 15 DACH1      |
| 1.06E-90  | 1.022756829 | 0.796 | 0.484 | 3.39E-86  | 15 RALGPS2    |
| 9.59E-80  | 1.013811154 | 0.514 | 0.211 | 3.08E-75  | 15 FAM83B     |
| 3.06E-84  | 1.001388505 | 0.644 | 0.314 | 9.82E-80  | 15 EGLN1      |
| 1.71E-29  | 0.999858044 | 0.448 | 0.258 | 5.51E-25  | 15 HSP90B1    |
| 2.38E-100 | 0.999043657 | 0.596 | 0.246 | 7.66E-96  | 15 DLG5       |
| 2.11E-89  | 0.997828329 | 0.877 | 0.621 | 6.77E-85  | 15 GAREM1     |
| 1.40E-63  | 0.994182094 | 0.583 | 0.304 | 4.48E-59  | 15 GALNT7     |
| 2.22E-75  | 0.991492944 | 0.854 | 0.655 | 7.12E-71  | 15 HIPK2      |
| 4.03E-125 | 0.984884211 | 0.962 | 0.825 | 1.29E-120 | 15 MSI2       |
| 1.61E-115 | 0.983344883 | 0.668 | 0.269 | 5.19E-111 | 15 STIM1      |
| 2.67E-117 | 0.980611219 | 0.529 | 0.17  | 8.58E-113 | 15 DOP1B      |
| 3.54E-78  | 0.979677009 | 0.783 | 0.464 | 1.14E-73  | 15 ARHGAP18   |
| 3.33E-74  | 0.978599558 | 0.789 | 0.501 | 1.07E-69  | 15 BACH1      |
| 6.56E-70  | 0.977000985 | 0.65  | 0.322 | 2.11E-65  | 15 TMPRSS2    |
| 0         | 0.975347643 | 0.35  | 0.029 | 0         | 15 AL355472.2 |
| 2.38E-59  | 0.971473424 | 0.484 | 0.225 | 7.65E-55  | 15 MDFIC      |
| 1.21E-45  | 0.970406828 | 0.59  | 0.339 | 3.89E-41  | 15 GLCC1      |
| 2.58E-60  | 0.970321383 | 0.733 | 0.443 | 8.30E-56  | 15 RNF150     |
| 9.02E-114 | 0.96671656  | 0.397 | 0.101 | 2.90E-109 | 15 ITIH5      |
| 4.85E-60  | 0.966484674 | 0.588 | 0.301 | 1.56E-55  | 15 PXX        |
| 1.96E-60  | 0.957725357 | 0.567 | 0.285 | 6.28E-56  | 15 FAM117B    |

|           |             |       |       |           |                 |
|-----------|-------------|-------|-------|-----------|-----------------|
| 8.96E-39  | 0.955200351 | 0.435 | 0.223 | 2.88E-34  | 15 OXCT1        |
| 1.11E-42  | 0.953265217 | 0.478 | 0.245 | 3.56E-38  | 15 CERS4        |
| 2.27E-62  | 0.952949528 | 0.796 | 0.589 | 7.30E-58  | 15 MAPKAP1      |
| 1.80E-80  | 0.952257342 | 0.742 | 0.418 | 5.77E-76  | 15 TBC1D14      |
| 0         | 0.949430183 | 0.384 | 0.03  | 0         | 15 STAC2        |
| 3.75E-194 | 0.947470892 | 0.422 | 0.075 | 1.20E-189 | 15 MAP3K8       |
| 0         | 0.942286928 | 0.408 | 0.036 | 0         | 15 PTPRC        |
| 5.45E-67  | 0.939484592 | 0.455 | 0.186 | 1.75E-62  | 15 MBOAT1       |
| 3.57E-67  | 0.936501265 | 0.724 | 0.473 | 1.15E-62  | 15 RGPD8        |
| 5.51E-262 | 0.936020486 | 0.307 | 0.029 | 1.77E-257 | 15 ADAMTS18     |
| 4.01E-70  | 0.932556869 | 0.628 | 0.322 | 1.29E-65  | 15 MEGF9        |
| 5.41E-164 | 0.930593026 | 0.475 | 0.109 | 1.74E-159 | 15 ATP6AP2      |
| 0         | 0.929028378 | 0.31  | 0.017 | 0         | 15 AC136428.4   |
| 7.85E-82  | 0.928820077 | 0.603 | 0.287 | 2.52E-77  | 15 KDM7A        |
| 1.68E-99  | 0.915000549 | 0.484 | 0.157 | 5.40E-95  | 15 IRS1         |
| 2.80E-79  | 0.912835286 | 0.794 | 0.462 | 8.99E-75  | 15 PRR5-ARHGAP8 |
| 0         | 0.912298018 | 0.289 | 0.013 | 0         | 15 LINC01687    |
| 3.78E-51  | 0.912162764 | 0.635 | 0.37  | 1.22E-46  | 15 SAMD4A       |
| 5.42E-60  | 0.905257153 | 0.597 | 0.312 | 1.74E-55  | 15 RPS6KA3      |
| 6.51E-68  | 0.904310477 | 0.587 | 0.291 | 2.09E-63  | 15 EIPR1        |
| 2.74E-58  | 0.900168332 | 0.875 | 0.665 | 8.80E-54  | 15 PPARGC1A     |
| 2.27E-56  | 0.899340583 | 0.599 | 0.322 | 7.28E-52  | 15 KLF6         |
| 2.77E-162 | 0.894520331 | 0.345 | 0.058 | 8.89E-158 | 15 ITPRID1      |
| 3.08E-86  | 0.892066674 | 0.982 | 0.847 | 9.88E-82  | 15 LRMDA        |
| 3.18E-81  | 0.891734557 | 0.538 | 0.224 | 1.02E-76  | 15 FGF9         |
| 1.71E-244 | 0.890884651 | 0.339 | 0.038 | 5.49E-240 | 15 CLDN1        |
| 1.12E-77  | 0.887318023 | 0.495 | 0.197 | 3.61E-73  | 15 NIN          |
| 5.31E-82  | 0.883300242 | 0.769 | 0.425 | 1.71E-77  | 15 SCNN1A       |
| 1.32E-63  | 0.882700303 | 0.688 | 0.412 | 4.24E-59  | 15 PRKDC        |
| 6.24E-72  | 0.881375868 | 0.868 | 0.689 | 2.00E-67  | 15 UBE2H        |
| 2.26E-75  | 0.876409005 | 0.545 | 0.235 | 7.25E-71  | 15 SCAI         |
| 7.32E-64  | 0.875021826 | 0.83  | 0.585 | 2.35E-59  | 15 PTPRJ        |
| 2.78E-97  | 0.874959862 | 0.59  | 0.235 | 8.93E-93  | 15 ITPK1        |
| 4.96E-72  | 0.8749428   | 0.547 | 0.247 | 1.59E-67  | 15 ATP9A        |
| 2.82E-63  | 0.866622838 | 0.538 | 0.246 | 9.04E-59  | 15 SNED1        |
| 1.12E-80  | 0.863368102 | 0.44  | 0.156 | 3.61E-76  | 15 ABHD3        |
| 3.94E-102 | 0.862079329 | 0.563 | 0.21  | 1.27E-97  | 15 TSPAN14      |
| 1.97E-50  | 0.861186548 | 0.592 | 0.315 | 6.31E-46  | 15 FAM110B      |
| 1.04E-44  | 0.859377982 | 0.619 | 0.354 | 3.35E-40  | 15 BACE2        |
| 7.12E-50  | 0.858857149 | 0.863 | 0.711 | 2.29E-45  | 15 MACROD2      |
| 6.06E-74  | 0.857798327 | 0.814 | 0.517 | 1.94E-69  | 15 DPY19L2      |
| 9.11E-122 | 0.857506879 | 0.384 | 0.091 | 2.93E-117 | 15 AC013472.1   |
| 1.90E-11  | 0.857317972 | 0.256 | 0.162 | 6.11E-07  | 15 UNC13C       |
| 7.25E-74  | 0.852512601 | 0.937 | 0.81  | 2.33E-69  | 15 PRKN         |
| 1.36E-33  | 0.85058745  | 0.614 | 0.415 | 4.36E-29  | 15 BACH2        |
| 6.04E-78  | 0.849549748 | 0.924 | 0.799 | 1.94E-73  | 15 SOX6         |
| 4.91E-49  | 0.846348538 | 0.323 | 0.123 | 1.58E-44  | 15 RGS7         |
| 8.13E-67  | 0.844716439 | 0.614 | 0.301 | 2.61E-62  | 15 SUSD1        |
| 7.03E-25  | 0.843787027 | 0.632 | 0.485 | 2.26E-20  | 15 CUL5         |
| 6.83E-64  | 0.838332824 | 0.61  | 0.324 | 2.19E-59  | 15 PTPN21       |
| 3.43E-54  | 0.836456473 | 0.783 | 0.568 | 1.10E-49  | 15 SGMS1        |

|           |             |       |       |           |               |
|-----------|-------------|-------|-------|-----------|---------------|
| 3.64E-51  | 0.83515299  | 0.673 | 0.411 | 1.17E-46  | 15 CYTH1      |
| 1.38E-86  | 0.831975687 | 0.597 | 0.258 | 4.43E-82  | 15 MYO19      |
| 3.68E-59  | 0.827730851 | 0.856 | 0.65  | 1.18E-54  | 15 HERC1      |
| 2.61E-65  | 0.826395764 | 0.471 | 0.205 | 8.38E-61  | 15 AC036214.3 |
| 6.37E-56  | 0.824324435 | 0.69  | 0.428 | 2.04E-51  | 15 CMAHP      |
| 9.50E-72  | 0.823520063 | 0.913 | 0.718 | 3.05E-67  | 15 CGNL1      |
| 4.75E-61  | 0.821826307 | 0.729 | 0.463 | 1.53E-56  | 15 CDC42BPB   |
| 5.40E-62  | 0.821377339 | 0.778 | 0.519 | 1.74E-57  | 15 CAB39      |
| 5.49E-201 | 0.818958208 | 0.28  | 0.032 | 1.76E-196 | 15 AC007563.2 |
| 8.31E-254 | 0.818707219 | 0.35  | 0.039 | 2.67E-249 | 15 AC084048.1 |
| 1.58E-46  | 0.814569905 | 0.619 | 0.389 | 5.09E-42  | 15 RNF149     |
| 1.28E-94  | 0.814108822 | 0.982 | 0.921 | 4.11E-90  | 15 FHIT       |
| 2.77E-54  | 0.813770134 | 0.684 | 0.406 | 8.89E-50  | 15 ASTN2      |
| 3.59E-64  | 0.813612646 | 0.919 | 0.804 | 1.15E-59  | 15 AC016831.6 |
| 4.52E-38  | 0.811328316 | 0.383 | 0.182 | 1.45E-33  | 15 DNAH11     |
| 1.21E-58  | 0.811121977 | 0.765 | 0.518 | 3.87E-54  | 15 ATP6V1H    |
| 6.46E-62  | 0.810394538 | 0.832 | 0.516 | 2.08E-57  | 15 FREM1      |
| 5.43E-62  | 0.810379821 | 0.872 | 0.657 | 1.74E-57  | 15 SAMD12     |
| 2.34E-86  | 0.803277817 | 0.486 | 0.177 | 7.53E-82  | 15 WNK3       |
| 1.55E-74  | 0.79622829  | 0.625 | 0.271 | 4.99E-70  | 15 FYB2       |
| 1.54E-63  | 0.787914394 | 0.641 | 0.35  | 4.94E-59  | 15 SCML1      |
| 5.66E-276 | 0.78437411  | 0.305 | 0.028 | 1.82E-271 | 15 CDA        |
| 1.02E-21  | 0.784181777 | 0.563 | 0.429 | 3.26E-17  | 15 CDH12      |
| 4.86E-67  | 0.779490302 | 0.935 | 0.789 | 1.56E-62  | 15 NR3C2      |
| 9.01E-69  | 0.776163421 | 0.264 | 0.07  | 2.89E-64  | 15 LPAR1      |
| 9.64E-249 | 0.772962056 | 0.345 | 0.039 | 3.10E-244 | 15 FBN3       |
| 2.22E-44  | 0.77223539  | 0.718 | 0.471 | 7.15E-40  | 15 SPIRE1     |
| 2.72E-59  | 0.770406515 | 0.426 | 0.17  | 8.74E-55  | 15 UAP1       |
| 7.25E-62  | 0.770113031 | 0.262 | 0.073 | 2.33E-57  | 15 RIPOR2     |
| 7.15E-49  | 0.767238288 | 0.532 | 0.282 | 2.30E-44  | 15 TMEM65     |
| 3.80E-96  | 0.766000509 | 0.368 | 0.096 | 1.22E-91  | 15 VWA5B1     |
| 1.62E-269 | 0.764181394 | 0.357 | 0.039 | 5.21E-265 | 15 PACRG-AS3  |
| 2.41E-43  | 0.763752158 | 0.397 | 0.175 | 7.74E-39  | 15 ANGPT1     |
| 9.69E-46  | 0.762928998 | 0.619 | 0.354 | 3.11E-41  | 15 SGPP2      |
| 7.49E-57  | 0.760631804 | 0.585 | 0.306 | 2.40E-52  | 15 DOCK5      |
| 5.67E-38  | 0.760455943 | 0.637 | 0.434 | 1.82E-33  | 15 RAP1A      |
| 2.59E-20  | 0.757104076 | 0.415 | 0.258 | 8.31E-16  | 15 GS1-24F4.2 |
| 6.16E-35  | 0.755417061 | 0.827 | 0.66  | 1.98E-30  | 15 LGR4       |
| 7.48E-85  | 0.752762007 | 0.556 | 0.214 | 2.40E-80  | 15 ST3GAL1    |
| 2.38E-53  | 0.752304957 | 0.538 | 0.274 | 7.65E-49  | 15 ZNF431     |
| 1.81E-21  | 0.751161933 | 0.861 | 0.726 | 5.82E-17  | 15 DIP2C      |
| 5.64E-76  | 0.748559086 | 0.44  | 0.161 | 1.81E-71  | 15 ZFP64      |
| 1.33E-58  | 0.747959482 | 0.888 | 0.75  | 4.29E-54  | 15 BTBD9      |
| 9.82E-52  | 0.747365863 | 0.792 | 0.504 | 3.15E-47  | 15 SKAP1      |
| 1.13E-87  | 0.747316315 | 0.318 | 0.08  | 3.62E-83  | 15 FAM13C     |
| 5.01E-54  | 0.746367433 | 0.709 | 0.445 | 1.61E-49  | 15 SMURF1     |
| 1.90E-107 | 0.73953387  | 0.273 | 0.053 | 6.09E-103 | 15 RUNX2      |
| 4.39E-73  | 0.739528067 | 0.41  | 0.142 | 1.41E-68  | 15 PLS1       |
| 3.11E-40  | 0.738174605 | 0.749 | 0.544 | 1.00E-35  | 15 FAM120B    |
| 9.88E-29  | 0.737051999 | 0.422 | 0.239 | 3.17E-24  | 15 ACAT1      |
| 1.47E-61  | 0.736464966 | 0.848 | 0.527 | 4.73E-57  | 15 OSBPL3     |

|           |             |       |       |           |               |
|-----------|-------------|-------|-------|-----------|---------------|
| 8.43E-55  | 0.73338882  | 0.619 | 0.339 | 2.71E-50  | 15 TMEM116    |
| 4.45E-39  | 0.725580409 | 0.52  | 0.291 | 1.43E-34  | 15 YPEL2      |
| 1.43E-70  | 0.722156987 | 0.93  | 0.795 | 4.60E-66  | 15 SIK3       |
| 1.41E-49  | 0.719397384 | 0.785 | 0.607 | 4.52E-45  | 15 GIGYF2     |
| 3.65E-46  | 0.719220233 | 0.711 | 0.489 | 1.17E-41  | 15 SMAP1      |
| 3.36E-106 | 0.717138368 | 0.327 | 0.073 | 1.08E-101 | 15 AL691403.1 |
| 6.40E-48  | 0.715108875 | 0.617 | 0.359 | 2.06E-43  | 15 ANXA11     |
| 9.96E-26  | 0.714192872 | 0.487 | 0.315 | 3.20E-21  | 15 LRIG2      |
| 2.30E-39  | 0.713370217 | 0.769 | 0.577 | 7.38E-35  | 15 USP9X      |
| 5.79E-65  | 0.710608452 | 0.542 | 0.236 | 1.86E-60  | 15 COL6A1     |
| 2.20E-45  | 0.709293604 | 0.803 | 0.636 | 7.05E-41  | 15 TMCC1      |
| 2.32E-74  | 0.708228272 | 0.915 | 0.826 | 7.46E-70  | 15 ZFAND3     |
| 3.48E-45  | 0.707817129 | 0.738 | 0.494 | 1.12E-40  | 15 XKR6       |
| 3.61E-70  | 0.705336    | 0.973 | 0.843 | 1.16E-65  | 15 MUC20-OT1  |
| 3.45E-27  | 0.703707671 | 0.578 | 0.403 | 1.11E-22  | 15 CAMK2D     |
| 1.97E-128 | 0.701007856 | 0.408 | 0.098 | 6.32E-124 | 15 MINDY1     |
| 7.82E-47  | 0.699325462 | 0.511 | 0.268 | 2.51E-42  | 15 MACO1      |
| 1.96E-46  | 0.698491406 | 0.774 | 0.555 | 6.29E-42  | 15 ELF2       |
| 8.78E-53  | 0.696245483 | 0.865 | 0.706 | 2.82E-48  | 15 STK3       |
| 1.31E-279 | 0.696100599 | 0.289 | 0.024 | 4.22E-275 | 15 LINC01323  |
| 2.18E-70  | 0.694946739 | 0.46  | 0.183 | 7.01E-66  | 15 INSIG2     |
| 1.61E-58  | 0.693208973 | 0.471 | 0.208 | 5.16E-54  | 15 PPFIBP2    |
| 8.58E-141 | 0.691948462 | 0.347 | 0.067 | 2.75E-136 | 15 PLAGL2     |
| 1.05E-39  | 0.688315596 | 0.641 | 0.417 | 3.38E-35  | 15 RAPGEF1    |
| 5.90E-111 | 0.687529396 | 0.516 | 0.156 | 1.89E-106 | 15 PLCE1      |
| 1.31E-41  | 0.687022341 | 0.812 | 0.638 | 4.21E-37  | 15 QKI        |
| 3.05E-36  | 0.686031989 | 0.668 | 0.462 | 9.79E-32  | 15 MCU        |
| 6.05E-49  | 0.685613136 | 0.78  | 0.54  | 1.94E-44  | 15 CTDSPL     |
| 5.80E-43  | 0.684970506 | 0.738 | 0.533 | 1.86E-38  | 15 ARHGEF7    |
| 4.74E-40  | 0.684092677 | 0.634 | 0.403 | 1.52E-35  | 15 CDYL       |
| 7.78E-66  | 0.681597891 | 0.489 | 0.211 | 2.50E-61  | 15 CLN8       |
| 8.08E-51  | 0.679294689 | 0.477 | 0.223 | 2.59E-46  | 15 CBR3-AS1   |
| 7.79E-67  | 0.67574826  | 0.948 | 0.828 | 2.50E-62  | 15 MACF1      |
| 4.95E-59  | 0.671863238 | 0.486 | 0.207 | 1.59E-54  | 15 TLE1       |
| 1.22E-68  | 0.667451332 | 0.466 | 0.194 | 3.90E-64  | 15 RGPD6      |
| 4.92E-92  | 0.666647923 | 0.336 | 0.087 | 1.58E-87  | 15 CEP78      |
| 3.42E-156 | 0.663933113 | 0.316 | 0.052 | 1.10E-151 | 15 MMD        |
| 4.44E-30  | 0.661046941 | 0.78  | 0.616 | 1.43E-25  | 15 CPQ        |
| 6.06E-37  | 0.660455262 | 0.588 | 0.364 | 1.95E-32  | 15 PNPLA8     |
| 6.57E-57  | 0.657115607 | 0.332 | 0.11  | 2.11E-52  | 15 LY86-AS1   |
| 4.31E-55  | 0.654680691 | 0.59  | 0.31  | 1.38E-50  | 15 AMFR       |
| 1.43E-32  | 0.654410651 | 0.536 | 0.331 | 4.59E-28  | 15 GLUD1      |
| 1.60E-36  | 0.654279612 | 0.413 | 0.198 | 5.14E-32  | 15 GALNT17    |
| 1.83E-122 | 0.653552476 | 0.384 | 0.089 | 5.89E-118 | 15 TCF3       |
| 4.88E-25  | 0.651580822 | 0.673 | 0.495 | 1.57E-20  | 15 MLLT3      |
| 4.51E-43  | 0.65044659  | 0.819 | 0.647 | 1.45E-38  | 15 ARFGEF1    |
| 2.80E-33  | 0.649979331 | 0.778 | 0.584 | 8.98E-29  | 15 TRHDE      |
| 6.17E-41  | 0.649444086 | 0.814 | 0.623 | 1.98E-36  | 15 DMXL1      |
| 4.67E-68  | 0.643570745 | 0.404 | 0.145 | 1.50E-63  | 15 ST14       |
| 3.30E-64  | 0.640716247 | 0.37  | 0.128 | 1.06E-59  | 15 SH2D4A     |
| 6.51E-36  | 0.637193482 | 0.724 | 0.516 | 2.09E-31  | 15 PACS1      |

|           |             |       |       |           |               |
|-----------|-------------|-------|-------|-----------|---------------|
| 7.31E-48  | 0.633557917 | 0.52  | 0.268 | 2.35E-43  | 15 FASTKD1    |
| 5.03E-155 | 0.630477544 | 0.251 | 0.032 | 1.62E-150 | 15 UBE2QL1    |
| 9.70E-45  | 0.629509908 | 0.619 | 0.351 | 3.12E-40  | 15 PPP1R13B   |
| 4.50E-31  | 0.627740468 | 0.708 | 0.515 | 1.45E-26  | 15 AC068205.2 |
| 1.76E-30  | 0.627143104 | 0.652 | 0.46  | 5.65E-26  | 15 ZFAND5     |
| 2.04E-15  | 0.626632871 | 0.675 | 0.572 | 6.56E-11  | 15 CNKSR3     |
| 1.73E-40  | 0.624480864 | 0.339 | 0.147 | 5.56E-36  | 15 KLHL23     |
| 7.95E-30  | 0.623293642 | 0.675 | 0.498 | 2.55E-25  | 15 PSME4      |
| 1.37E-34  | 0.622406964 | 0.608 | 0.4   | 4.40E-30  | 15 CGGBP1     |
| 2.53E-43  | 0.62136754  | 0.673 | 0.438 | 8.13E-39  | 15 U2SURP     |
| 2.08E-41  | 0.620033837 | 0.442 | 0.219 | 6.68E-37  | 15 SERGEF     |
| 9.03E-29  | 0.616093747 | 0.621 | 0.446 | 2.90E-24  | 15 UBE2E1     |
| 4.87E-51  | 0.614651339 | 0.796 | 0.481 | 1.56E-46  | 15 TOX3       |
| 8.03E-55  | 0.614577685 | 0.267 | 0.081 | 2.58E-50  | 15 CYTIP      |
| 3.60E-41  | 0.613064293 | 0.753 | 0.487 | 1.16E-36  | 15 HOXB3      |
| 5.10E-41  | 0.612585855 | 0.717 | 0.478 | 1.64E-36  | 15 ZFYVE16    |
| 4.00E-44  | 0.612271631 | 0.699 | 0.466 | 1.29E-39  | 15 CAPZB      |
| 4.09E-71  | 0.609949503 | 0.347 | 0.11  | 1.31E-66  | 15 SMYD2      |
| 1.39E-19  | 0.609429144 | 0.605 | 0.456 | 4.46E-15  | 15 AC145212.1 |
| 2.61E-40  | 0.609028153 | 0.691 | 0.457 | 8.38E-36  | 15 ZMIZ1      |
| 8.10E-34  | 0.608629524 | 0.504 | 0.29  | 2.60E-29  | 15 LAMC1      |
| 4.60E-26  | 0.60229659  | 0.597 | 0.402 | 1.48E-21  | 15 SSBP3      |
| 2.47E-45  | 0.599945414 | 0.379 | 0.16  | 7.93E-41  | 15 RFTN1      |
| 7.49E-33  | 0.597676588 | 0.809 | 0.645 | 2.40E-28  | 15 FNBP1L     |
| 4.55E-37  | 0.59767107  | 0.671 | 0.457 | 1.46E-32  | 15 ACTR3C     |
| 4.88E-30  | 0.595006214 | 0.655 | 0.44  | 1.57E-25  | 15 SEPTIN9    |
| 2.45E-35  | 0.594420088 | 0.54  | 0.32  | 7.86E-31  | 15 NUP160     |
| 7.67E-45  | 0.594165387 | 0.532 | 0.276 | 2.46E-40  | 15 TMCO4      |
| 1.31E-36  | 0.588160295 | 0.776 | 0.601 | 4.21E-32  | 15 CAMTA1     |
| 2.61E-100 | 0.586728294 | 0.262 | 0.051 | 8.38E-96  | 15 DLL1       |
| 2.11E-42  | 0.586145765 | 0.437 | 0.212 | 6.76E-38  | 15 PLEKHA8    |
| 3.95E-36  | 0.584556494 | 0.742 | 0.505 | 1.27E-31  | 15 RALGPS1    |
| 1.85E-24  | 0.583806877 | 0.505 | 0.328 | 5.95E-20  | 15 PISD       |
| 7.86E-35  | 0.5820734   | 0.522 | 0.289 | 2.53E-30  | 15 CDH1       |
| 7.34E-35  | 0.580123056 | 0.603 | 0.385 | 2.36E-30  | 15 STRN       |
| 2.06E-35  | 0.580044805 | 0.886 | 0.728 | 6.61E-31  | 15 SHANK2     |
| 5.28E-32  | 0.578836648 | 0.652 | 0.439 | 1.70E-27  | 15 AC013394.1 |
| 3.36E-68  | 0.578119994 | 0.442 | 0.166 | 1.08E-63  | 15 SH3TC1     |
| 3.66E-33  | 0.577873317 | 0.608 | 0.391 | 1.18E-28  | 15 STT3B      |
| 2.36E-41  | 0.577506793 | 0.834 | 0.661 | 7.56E-37  | 15 PKN2       |
| 1.32E-40  | 0.576302469 | 0.796 | 0.532 | 4.25E-36  | 15 MYO10      |
| 1.12E-21  | 0.576205454 | 0.628 | 0.46  | 3.60E-17  | 15 FRK        |
| 4.37E-34  | 0.575427124 | 0.597 | 0.368 | 1.40E-29  | 15 SLC43A2    |
| 4.01E-30  | 0.573369571 | 0.679 | 0.467 | 1.29E-25  | 15 UTY        |
| 1.95E-34  | 0.572555976 | 0.747 | 0.55  | 6.27E-30  | 15 SIPA1L3    |
| 9.78E-35  | 0.57236242  | 0.478 | 0.265 | 3.14E-30  | 15 UGP2       |
| 2.25E-34  | 0.572339989 | 0.561 | 0.339 | 7.22E-30  | 15 ACSL3      |
| 3.81E-31  | 0.572036107 | 0.39  | 0.198 | 1.23E-26  | 15 MAPRE2     |
| 7.03E-33  | 0.569856521 | 0.673 | 0.467 | 2.26E-28  | 15 CDC42SE2   |
| 5.40E-29  | 0.569074492 | 0.693 | 0.515 | 1.73E-24  | 15 UNC13B     |
| 2.25E-34  | 0.568468135 | 0.5   | 0.283 | 7.22E-30  | 15 SGMS2      |



|          |             |       |       |          |               |
|----------|-------------|-------|-------|----------|---------------|
| 2.50E-55 | 0.56796035  | 0.33  | 0.116 | 8.04E-51 | 15 AL356124.1 |
| 3.75E-23 | 0.566689514 | 0.464 | 0.293 | 1.20E-18 | 15 SLC19A2    |
| 3.42E-39 | 0.562654649 | 0.285 | 0.111 | 1.10E-34 | 15 PDE11A     |
| 2.94E-26 | 0.562385615 | 0.596 | 0.401 | 9.43E-22 | 15 PHACTR2    |
| 1.15E-26 | 0.561378649 | 0.699 | 0.492 | 3.68E-22 | 15 ZNRF3      |
| 1.76E-31 | 0.561182953 | 0.289 | 0.124 | 5.64E-27 | 15 UPP1       |
| 4.58E-35 | 0.558992396 | 0.767 | 0.572 | 1.47E-30 | 15 RICTOR     |
| 2.08E-41 | 0.557189467 | 0.91  | 0.795 | 6.69E-37 | 15 FAF1       |
| 1.42E-32 | 0.554487328 | 0.551 | 0.328 | 4.55E-28 | 15 CRYBG3     |
| 8.68E-57 | 0.553430371 | 0.406 | 0.152 | 2.79E-52 | 15 SIPA1L2    |
| 6.75E-43 | 0.552718864 | 0.451 | 0.223 | 2.17E-38 | 15 SELENOI    |
| 6.42E-28 | 0.552490183 | 0.713 | 0.5   | 2.06E-23 | 15 TRIM2      |
| 1.40E-33 | 0.551074656 | 0.76  | 0.552 | 4.51E-29 | 15 MRTFA      |
| 5.59E-29 | 0.548583467 | 0.874 | 0.763 | 1.79E-24 | 15 BAZ2B      |
| 6.31E-31 | 0.54834653  | 0.684 | 0.493 | 2.03E-26 | 15 HIPK3      |
| 1.19E-19 | 0.547393029 | 0.525 | 0.359 | 3.81E-15 | 15 MOB3B      |
| 5.03E-29 | 0.546664126 | 0.693 | 0.504 | 1.61E-24 | 15 ABCD3      |
| 1.65E-60 | 0.544962118 | 0.267 | 0.079 | 5.29E-56 | 15 ABHD10     |
| 3.44E-33 | 0.543956758 | 0.292 | 0.126 | 1.10E-28 | 15 AC007161.3 |
| 2.48E-32 | 0.542991744 | 0.616 | 0.394 | 7.98E-28 | 15 GNAS       |
| 1.68E-27 | 0.542763957 | 0.363 | 0.189 | 5.39E-23 | 15 MIR222HG   |
| 4.13E-30 | 0.541480822 | 0.449 | 0.242 | 1.33E-25 | 15 BHLHE40    |
| 1.85E-21 | 0.539050207 | 0.5   | 0.33  | 5.94E-17 | 15 RIMKLB     |
| 1.26E-21 | 0.537997954 | 0.372 | 0.218 | 4.05E-17 | 15 SEL1L      |
| 1.08E-21 | 0.537741011 | 0.616 | 0.453 | 3.46E-17 | 15 ZNF618     |
| 3.71E-33 | 0.533905858 | 0.662 | 0.439 | 1.19E-28 | 15 CHD7       |
| 1.22E-39 | 0.533826295 | 0.482 | 0.246 | 3.90E-35 | 15 KHDRBS3    |
| 2.08E-28 | 0.531437876 | 0.67  | 0.491 | 6.68E-24 | 15 SDHAP1     |
| 4.31E-25 | 0.530646421 | 0.576 | 0.395 | 1.38E-20 | 15 REPS1      |
| 1.43E-37 | 0.530331903 | 0.442 | 0.224 | 4.61E-33 | 15 TFEB       |
| 7.79E-22 | 0.526464973 | 0.379 | 0.217 | 2.50E-17 | 15 NLGN4Y     |
| 1.92E-27 | 0.522527915 | 0.61  | 0.411 | 6.17E-23 | 15 PPFIA1     |
| 2.73E-25 | 0.520016659 | 0.28  | 0.132 | 8.76E-21 | 15 HNF4G      |
| 1.06E-28 | 0.519875976 | 0.466 | 0.274 | 3.40E-24 | 15 MRPL1      |
| 3.30E-31 | 0.518272572 | 0.838 | 0.724 | 1.06E-26 | 15 NF1        |
| 3.44E-24 | 0.517243748 | 0.681 | 0.508 | 1.10E-19 | 15 CHD2       |
| 1.81E-25 | 0.513891187 | 0.525 | 0.335 | 5.82E-21 | 15 ST3GAL6    |
| 4.46E-16 | 0.512972431 | 0.5   | 0.348 | 1.43E-11 | 15 RETREG1    |
| 3.99E-26 | 0.512708071 | 0.435 | 0.255 | 1.28E-21 | 15 PCMTD2     |
| 2.00E-50 | 0.511081704 | 0.448 | 0.201 | 6.41E-46 | 15 PAFAH1B2   |
| 1.10E-26 | 0.511045465 | 0.735 | 0.56  | 3.54E-22 | 15 MAP7       |
| 2.60E-34 | 0.510659722 | 0.347 | 0.152 | 8.33E-30 | 15 DOCK10     |
| 5.67E-28 | 0.509777799 | 0.85  | 0.706 | 1.82E-23 | 15 UBE2E2     |
| 1.07E-18 | 0.508758544 | 0.41  | 0.26  | 3.44E-14 | 15 DOCK3      |
| 1.95E-34 | 0.508630678 | 0.437 | 0.226 | 6.27E-30 | 15 RALA       |
| 3.51E-37 | 0.508580919 | 0.446 | 0.227 | 1.13E-32 | 15 ABHD12     |
| 1.72E-29 | 0.504946609 | 0.498 | 0.293 | 5.51E-25 | 15 ATP6V0E1   |
| 2.57E-42 | 0.504647943 | 0.468 | 0.226 | 8.24E-38 | 15 BAIAP2L1   |
| 5.00E-33 | 0.504236398 | 0.635 | 0.397 | 1.61E-28 | 15 ABCC5      |
| 9.48E-10 | 0.504229771 | 0.323 | 0.217 | 3.04E-05 | 15 TFRC       |
| 2.18E-35 | 0.503647631 | 0.278 | 0.11  | 7.02E-31 | 15 TBXAS1     |

|          |             |       |       |             |               |
|----------|-------------|-------|-------|-------------|---------------|
| 4.51E-24 | 0.502238424 | 0.484 | 0.291 | 1.45E-19    | 15 PBX3       |
| 3.09E-34 | 0.498722078 | 0.529 | 0.302 | 9.92E-30    | 15 N4BP1      |
| 8.82E-73 | 0.498008329 | 0.283 | 0.074 | 2.83E-68    | 15 CORO2B     |
| 1.19E-49 | 0.496467289 | 0.374 | 0.148 | 3.81E-45    | 15 AMOTL1     |
| 1.51E-21 | 0.493933625 | 0.628 | 0.47  | 4.86E-17    | 15 VAPA       |
| 9.38E-26 | 0.492075643 | 0.671 | 0.491 | 3.01E-21    | 15 DIAPH1     |
| 2.25E-40 | 0.492044027 | 0.57  | 0.305 | 7.22E-36    | 15 NPNT       |
| 2.47E-37 | 0.491635107 | 0.572 | 0.333 | 7.93E-33    | 15 EXOC6      |
| 3.27E-25 | 0.491315729 | 0.704 | 0.534 | 1.05E-20    | 15 RNF38      |
| 1.21E-22 | 0.489242479 | 0.637 | 0.476 | 3.89E-18    | 15 STX18      |
| 7.32E-27 | 0.488579002 | 0.588 | 0.383 | 2.35E-22    | 15 MRPS5      |
| 3.76E-25 | 0.488161897 | 0.495 | 0.314 | 1.21E-20    | 15 STXBP3     |
| 7.18E-15 | 0.487630685 | 0.435 | 0.293 | 2.31E-10    | 15 DEFB1      |
| 6.49E-37 | 0.487388338 | 0.3   | 0.123 | 2.08E-32    | 15 ERO1A      |
| 1.06E-24 | 0.484772889 | 0.673 | 0.504 | 3.41E-20    | 15 ARFGF2     |
| 9.55E-24 | 0.484299254 | 0.751 | 0.613 | 3.07E-19    | 15 CHCHD3     |
| 3.16E-38 | 0.484139648 | 0.948 | 0.785 | 1.02E-33    | 15 PLCL1      |
| 1.02E-29 | 0.482374117 | 0.816 | 0.699 | 3.28E-25    | 15 PPP6R3     |
| 2.49E-24 | 0.481483878 | 0.442 | 0.265 | 8.01E-20    | 15 MAP3K3     |
| 7.32E-24 | 0.480141409 | 0.594 | 0.413 | 2.35E-19    | 15 MEMO1      |
| 2.35E-55 | 0.479888288 | 0.278 | 0.087 | 7.56E-51    | 15 PLLP       |
| 1.94E-15 | 0.477408722 | 0.442 | 0.294 | 6.24E-11    | 15 MAL        |
| 2.66E-20 | 0.476611436 | 0.724 | 0.573 | 8.54E-16    | 15 FAM160A1   |
| 1.98E-39 | 0.475900854 | 0.356 | 0.156 | 6.35E-35    | 15 ANXA5      |
| 2.35E-20 | 0.474598944 | 0.673 | 0.539 | 7.55E-16    | 15 LRRFIP2    |
| 8.29E-47 | 0.473670129 | 0.336 | 0.13  | 2.66E-42    | 15 PDIA6      |
| 3.11E-19 | 0.472974921 | 0.468 | 0.311 | 1.00E-14    | 15 MTOR       |
| 2.05E-18 | 0.470924914 | 0.52  | 0.367 | 6.58E-14    | 15 ZCCHC14    |
| 8.27E-22 | 0.469685293 | 0.67  | 0.505 | 2.65E-17    | 15 ECPAS      |
| 3.37E-30 | 0.468555799 | 0.83  | 0.705 | 1.08E-25    | 15 AFDN       |
| 3.33E-20 | 0.46832953  | 0.643 | 0.484 | 1.07E-15    | 15 TACC2      |
| 4.71E-34 | 0.467892759 | 0.939 | 0.875 | 1.51E-29    | 15 LPP        |
| 3.70E-33 | 0.466393356 | 0.448 | 0.242 | 1.19E-28    | 15 RGPD4      |
| 3.73E-23 | 0.465395634 | 0.863 | 0.748 | 1.20E-18    | 15 FBXL17     |
| 4.99E-47 | 0.463944747 | 0.314 | 0.117 | 1.60E-42    | 15 AC058791.1 |
| 2.82E-22 | 0.463753714 | 0.682 | 0.519 | 9.05E-18    | 15 ITSN2      |
| 1.13E-30 | 0.463660173 | 0.381 | 0.193 | 3.64E-26    | 15 JADE3      |
| 5.36E-16 | 0.463411223 | 0.688 | 0.542 | 1.72E-11    | 15 DENND4A    |
| 2.80E-25 | 0.460679174 | 0.715 | 0.528 | 8.99E-21    | 15 LARP4      |
| 4.54E-36 | 0.460545992 | 0.314 | 0.131 | 1.46E-31    | 15 EFEMP1     |
| 3.71E-25 | 0.460455246 | 0.276 | 0.129 | 1.19E-20    | 15 SLC9A9     |
| 7.35E-17 | 0.460357044 | 0.395 | 0.249 | 2.36E-12    | 15 NSUN7      |
| 5.51E-22 | 0.458689877 | 0.724 | 0.576 | 1.77E-17    | 15 XRN1       |
| 5.52E-23 | 0.458535055 | 0.366 | 0.201 | 1.77E-18    | 15 GOLM1      |
| 1.87E-13 | 0.457825782 | 0.608 | 0.489 | 6.01E-09    | 15 FAM135A    |
| 5.28E-38 | 0.45581064  | 0.415 | 0.201 | 1.69E-33    | 15 PRDM4      |
| 9.80E-39 | 0.455667047 | 0.446 | 0.214 | 3.15E-34    | 15 SYK        |
| 4.86E-28 | 0.455516232 | 0.455 | 0.264 | 1.56E-23    | 15 PLEKHB2    |
| 3.12E-20 | 0.455116907 | 0.726 | 0.57  | 1.00E-15    | 15 FBXW11     |
| 2.64E-05 | 0.453802985 | 0.453 | 0.379 | 0.848119758 | 15 AC107223.1 |
| 4.56E-21 | 0.453622714 | 0.489 | 0.323 | 1.46E-16    | 15 USP6NL     |

|          |             |       |       |          |               |
|----------|-------------|-------|-------|----------|---------------|
| 3.05E-19 | 0.45333345  | 0.735 | 0.597 | 9.80E-15 | 15 CTBP2      |
| 1.23E-29 | 0.453077037 | 0.287 | 0.128 | 3.95E-25 | 15 SOAT1      |
| 1.79E-49 | 0.451765604 | 0.255 | 0.08  | 5.76E-45 | 15 TMEM51-AS1 |
| 2.55E-26 | 0.451611618 | 0.762 | 0.582 | 8.18E-22 | 15 NPEPPS     |
| 1.03E-16 | 0.45127512  | 0.773 | 0.632 | 3.29E-12 | 15 CLMN       |
| 4.45E-35 | 0.451106091 | 0.323 | 0.142 | 1.43E-30 | 15 LRP12      |
| 1.40E-21 | 0.450854981 | 0.563 | 0.384 | 4.51E-17 | 15 CBFEB      |
| 1.94E-18 | 0.450814621 | 0.653 | 0.476 | 6.24E-14 | 15 FAAH2      |
| 1.65E-28 | 0.450474242 | 0.341 | 0.164 | 5.31E-24 | 15 STAC       |
| 6.83E-18 | 0.449413674 | 0.677 | 0.53  | 2.19E-13 | 15 HIVEP2     |
| 6.23E-25 | 0.449171512 | 0.643 | 0.465 | 2.00E-20 | 15 RNGTT      |
| 1.46E-24 | 0.448404567 | 0.457 | 0.274 | 4.67E-20 | 15 DAB2IP     |
| 6.94E-26 | 0.447992657 | 0.782 | 0.623 | 2.23E-21 | 15 ANKRD28    |
| 1.26E-20 | 0.446500635 | 0.8   | 0.675 | 4.04E-16 | 15 EXT1       |
| 1.52E-28 | 0.445022168 | 0.365 | 0.188 | 4.88E-24 | 15 DDX52      |
| 1.34E-17 | 0.443254429 | 0.662 | 0.517 | 4.31E-13 | 15 DNAJC1     |
| 1.07E-32 | 0.43923198  | 0.366 | 0.174 | 3.43E-28 | 15 FAM169A    |
| 1.74E-26 | 0.439016484 | 0.498 | 0.308 | 5.58E-22 | 15 UBE2Q2P1   |
| 1.05E-24 | 0.438767207 | 0.61  | 0.396 | 3.39E-20 | 15 STOX2      |
| 1.49E-27 | 0.438274975 | 0.415 | 0.231 | 4.80E-23 | 15 SH3GLB1    |
| 7.62E-25 | 0.43792214  | 0.395 | 0.227 | 2.45E-20 | 15 APOOL      |
| 2.95E-20 | 0.437593334 | 0.444 | 0.29  | 9.49E-16 | 15 PPM1A      |
| 2.96E-20 | 0.437531757 | 0.563 | 0.399 | 9.49E-16 | 15 ATG5       |
| 2.46E-20 | 0.437422692 | 0.262 | 0.128 | 7.91E-16 | 15 AC117386.2 |
| 1.41E-20 | 0.437173133 | 0.661 | 0.493 | 4.54E-16 | 15 FBXL20     |
| 7.24E-17 | 0.436788047 | 0.339 | 0.199 | 2.32E-12 | 15 GADD45B    |
| 1.26E-57 | 0.436329438 | 0.348 | 0.123 | 4.04E-53 | 15 ATP6V0B    |
| 3.00E-20 | 0.43469186  | 0.839 | 0.713 | 9.65E-16 | 15 CDKAL1     |
| 2.92E-20 | 0.434229559 | 0.509 | 0.344 | 9.38E-16 | 15 TRIM24     |
| 5.33E-25 | 0.433829961 | 0.958 | 0.881 | 1.71E-20 | 15 WWOX       |
| 3.21E-23 | 0.43332214  | 0.531 | 0.349 | 1.03E-18 | 15 ADIPOR2    |
| 1.53E-28 | 0.4318573   | 0.356 | 0.177 | 4.91E-24 | 15 DSP        |
| 5.47E-25 | 0.431779881 | 0.534 | 0.339 | 1.76E-20 | 15 MAP4K4     |
| 1.52E-22 | 0.431224808 | 0.713 | 0.558 | 4.89E-18 | 15 KIF1B      |
| 2.28E-32 | 0.430999213 | 0.498 | 0.287 | 7.32E-28 | 15 RGPD3      |
| 1.69E-22 | 0.430273673 | 0.579 | 0.401 | 5.44E-18 | 15 SMG7       |
| 4.49E-15 | 0.428649669 | 0.507 | 0.361 | 1.44E-10 | 15 JADE1      |
| 3.24E-19 | 0.42803885  | 0.684 | 0.531 | 1.04E-14 | 15 ZFAND6     |
| 7.92E-26 | 0.427862708 | 0.531 | 0.336 | 2.54E-21 | 15 GSPT1      |
| 9.79E-19 | 0.42761892  | 0.5   | 0.339 | 3.14E-14 | 15 PARVA      |
| 3.61E-17 | 0.427435049 | 0.525 | 0.379 | 1.16E-12 | 15 PTPN2      |
| 1.17E-22 | 0.426881833 | 0.457 | 0.288 | 3.76E-18 | 15 CIBAR1     |
| 1.05E-16 | 0.425708375 | 0.659 | 0.526 | 3.37E-12 | 15 JARID2     |
| 6.45E-24 | 0.425141533 | 0.619 | 0.447 | 2.07E-19 | 15 AC090114.3 |
| 1.12E-22 | 0.422190954 | 0.348 | 0.195 | 3.59E-18 | 15 GTF3C3     |
| 3.63E-22 | 0.421719405 | 0.5   | 0.311 | 1.17E-17 | 15 GPRIN3     |
| 1.53E-28 | 0.421034057 | 0.502 | 0.296 | 4.90E-24 | 15 VEGFA      |
| 6.59E-18 | 0.420639341 | 0.632 | 0.445 | 2.12E-13 | 15 GPAT3      |
| 2.93E-25 | 0.418752599 | 0.338 | 0.173 | 9.41E-21 | 15 CHCHD6     |
| 1.93E-17 | 0.418640868 | 0.305 | 0.172 | 6.19E-13 | 15 FAM102A    |
| 6.47E-21 | 0.418103078 | 0.783 | 0.656 | 2.08E-16 | 15 MAP4       |

|          |             |       |       |             |                |
|----------|-------------|-------|-------|-------------|----------------|
| 1.69E-27 | 0.417612888 | 0.394 | 0.214 | 5.43E-23    | 15 ZBTB43      |
| 1.25E-19 | 0.416710984 | 0.448 | 0.288 | 4.02E-15    | 15 ZYG11B      |
| 2.11E-31 | 0.415031461 | 0.267 | 0.111 | 6.79E-27    | 15 EML5        |
| 5.16E-52 | 0.41437408  | 0.271 | 0.081 | 1.66E-47    | 15 NXPH2       |
| 3.33E-17 | 0.414034136 | 0.52  | 0.363 | 1.07E-12    | 15 ZC3H14      |
| 1.11E-17 | 0.412997506 | 0.601 | 0.452 | 3.55E-13    | 15 PRRC2B      |
| 4.61E-31 | 0.412272413 | 0.439 | 0.234 | 1.48E-26    | 15 KIF3B       |
| 5.89E-19 | 0.412080125 | 0.69  | 0.549 | 1.89E-14    | 15 SND1        |
| 1.59E-15 | 0.411472639 | 0.677 | 0.521 | 5.11E-11    | 15 ST7         |
| 2.73E-20 | 0.410228551 | 0.551 | 0.378 | 8.75E-16    | 15 MYO5B       |
| 6.63E-40 | 0.410147469 | 0.33  | 0.136 | 2.13E-35    | 15 SOGA1       |
| 1.39E-22 | 0.409846    | 0.534 | 0.354 | 4.45E-18    | 15 STAU1       |
| 3.28E-14 | 0.409755228 | 0.637 | 0.486 | 1.05E-09    | 15 SLC44A3-AS1 |
| 1.94E-21 | 0.409550167 | 0.63  | 0.458 | 6.22E-17    | 15 ARMH3       |
| 6.12E-45 | 0.40948976  | 0.256 | 0.086 | 1.97E-40    | 15 SERPINB1    |
| 3.93E-21 | 0.409276679 | 0.542 | 0.364 | 1.26E-16    | 15 CAPN2       |
| 3.14E-32 | 0.408884734 | 0.35  | 0.166 | 1.01E-27    | 15 UCHL3       |
| 2.77E-19 | 0.408441362 | 0.5   | 0.338 | 8.91E-15    | 15 NUDT3       |
| 2.07E-37 | 0.408376948 | 0.298 | 0.12  | 6.66E-33    | 15 BSG         |
| 1.98E-15 | 0.407371773 | 0.715 | 0.598 | 6.37E-11    | 15 ZNF644      |
| 1.11E-24 | 0.407224141 | 0.359 | 0.193 | 3.56E-20    | 15 UHMK1       |
| 8.75E-18 | 0.405951332 | 0.69  | 0.545 | 2.81E-13    | 15 KAT6B       |
| 4.66E-21 | 0.405685121 | 0.572 | 0.392 | 1.50E-16    | 15 ACTR3       |
| 4.73E-08 | 0.40558027  | 0.381 | 0.284 | 0.00151879  | 15 AL359232.1  |
| 8.54E-32 | 0.405155628 | 0.301 | 0.132 | 2.74E-27    | 15 CARS1       |
| 3.00E-30 | 0.404805204 | 0.747 | 0.535 | 9.62E-26    | 15 ABCA5       |
| 1.45E-17 | 0.403604341 | 0.787 | 0.674 | 4.64E-13    | 15 DYRK1A      |
| 1.82E-15 | 0.402514897 | 0.486 | 0.343 | 5.84E-11    | 15 PIK3CA      |
| 1.74E-21 | 0.400710185 | 0.319 | 0.171 | 5.58E-17    | 15 HDAC5       |
| 7.01E-17 | 0.4002703   | 0.619 | 0.475 | 2.25E-12    | 15 MOB1B       |
| 7.42E-12 | 0.400096722 | 0.392 | 0.273 | 2.38E-07    | 15 NHSL1       |
| 1.82E-20 | 0.39947063  | 0.253 | 0.123 | 5.85E-16    | 15 DRAM1       |
| 5.04E-22 | 0.399211034 | 0.693 | 0.52  | 1.62E-17    | 15 EPC2        |
| 4.40E-19 | 0.399112701 | 0.646 | 0.459 | 1.41E-14    | 15 FAM107B     |
| 2.97E-17 | 0.399075412 | 0.72  | 0.59  | 9.52E-13    | 15 SCAF8       |
| 8.23E-14 | 0.398965135 | 0.709 | 0.578 | 2.64E-09    | 15 SUPT3H      |
| 1.91E-21 | 0.398123609 | 0.399 | 0.237 | 6.12E-17    | 15 ZNF664      |
| 5.65E-20 | 0.398009738 | 0.605 | 0.441 | 1.81E-15    | 15 CDC73       |
| 5.58E-15 | 0.397023041 | 0.718 | 0.55  | 1.79E-10    | 15 ZBTB16      |
| 1.06E-20 | 0.396244739 | 0.312 | 0.166 | 3.42E-16    | 15 DSG2        |
| 3.79E-16 | 0.395866051 | 0.504 | 0.354 | 1.22E-11    | 15 ATP2A2      |
| 1.76E-17 | 0.395152909 | 0.552 | 0.395 | 5.65E-13    | 15 LNPEP       |
| 6.93E-24 | 0.394903993 | 0.415 | 0.235 | 2.23E-19    | 15 RAI1        |
| 3.85E-16 | 0.394817143 | 0.729 | 0.614 | 1.24E-11    | 15 FARS2       |
| 2.88E-06 | 0.394764551 | 0.316 | 0.236 | 0.092601595 | 15 NPSR1-AS1   |
| 1.89E-33 | 0.394045896 | 0.545 | 0.289 | 6.07E-29    | 15 MIR100HG    |
| 9.69E-13 | 0.393886196 | 0.706 | 0.583 | 3.11E-08    | 15 RAB10       |
| 4.51E-16 | 0.392633663 | 0.767 | 0.65  | 1.45E-11    | 15 BRWD1       |
| 5.54E-20 | 0.392415771 | 0.659 | 0.492 | 1.78E-15    | 15 GNB1        |
| 1.97E-19 | 0.391798537 | 0.643 | 0.475 | 6.32E-15    | 15 CDK8        |
| 2.69E-21 | 0.390944646 | 0.785 | 0.676 | 8.64E-17    | 15 DLG1        |

|          |             |       |       |             |              |
|----------|-------------|-------|-------|-------------|--------------|
| 1.41E-19 | 0.390544568 | 0.578 | 0.409 | 4.53E-15    | 15 ACACA     |
| 5.05E-17 | 0.389609271 | 0.518 | 0.361 | 1.62E-12    | 15 CNN3      |
| 3.99E-25 | 0.389544486 | 0.338 | 0.173 | 1.28E-20    | 15 SCRNI     |
| 2.69E-11 | 0.389541542 | 0.28  | 0.181 | 8.65E-07    | 15 PTS       |
| 3.49E-39 | 0.389264994 | 0.323 | 0.133 | 1.12E-34    | 15 RNASEK    |
| 1.44E-21 | 0.387976107 | 0.789 | 0.644 | 4.63E-17    | 15 ARIH1     |
| 4.66E-32 | 0.387784975 | 0.26  | 0.104 | 1.50E-27    | 15 FAM3B     |
| 4.67E-22 | 0.387600017 | 0.399 | 0.231 | 1.50E-17    | 15 GK        |
| 7.88E-24 | 0.387501078 | 0.61  | 0.4   | 2.53E-19    | 15 OGDHL     |
| 6.90E-20 | 0.387478653 | 0.457 | 0.297 | 2.22E-15    | 15 LPGAT1    |
| 5.87E-15 | 0.387398485 | 0.361 | 0.227 | 1.89E-10    | 15 RNF217    |
| 3.64E-22 | 0.386945143 | 0.412 | 0.243 | 1.17E-17    | 15 SPOPL     |
| 2.17E-16 | 0.386569075 | 0.765 | 0.614 | 6.98E-12    | 15 DPH6      |
| 1.80E-32 | 0.38588632  | 0.386 | 0.186 | 5.78E-28    | 15 SPECC1    |
| 1.19E-20 | 0.385322954 | 0.884 | 0.798 | 3.81E-16    | 15 SBF2      |
| 6.88E-25 | 0.385170578 | 0.437 | 0.251 | 2.21E-20    | 15 SINHCAF   |
| 8.53E-15 | 0.385034064 | 0.505 | 0.365 | 2.74E-10    | 15 SESN1     |
| 7.79E-25 | 0.384698031 | 0.388 | 0.21  | 2.50E-20    | 15 SLC38A11  |
| 4.74E-20 | 0.383950891 | 0.451 | 0.28  | 1.52E-15    | 15 ANKRD13A  |
| 2.21E-18 | 0.383463373 | 0.756 | 0.635 | 7.11E-14    | 15 MBNL2     |
| 4.11E-12 | 0.382502751 | 0.549 | 0.425 | 1.32E-07    | 15 SLX4IP    |
| 6.60E-25 | 0.382497771 | 0.841 | 0.697 | 2.12E-20    | 15 ZSWIM6    |
| 9.62E-15 | 0.382242944 | 0.413 | 0.267 | 3.09E-10    | 15 PANTR1    |
| 3.56E-15 | 0.382049383 | 0.327 | 0.197 | 1.14E-10    | 15 ICA1L     |
| 2.53E-12 | 0.379608503 | 0.271 | 0.161 | 8.11E-08    | 15 LINC00598 |
| 9.10E-19 | 0.379092904 | 0.644 | 0.474 | 2.92E-14    | 15 HNRNPDL   |
| 2.09E-45 | 0.379026056 | 0.603 | 0.312 | 6.70E-41    | 15 ABCC4     |
| 1.03E-14 | 0.37770036  | 0.671 | 0.516 | 3.32E-10    | 15 KIAA1328  |
| 1.58E-23 | 0.377357831 | 0.706 | 0.531 | 5.06E-19    | 15 ANKS1A    |
| 1.43E-16 | 0.377072292 | 0.699 | 0.561 | 4.60E-12    | 15 SNX14     |
| 1.20E-15 | 0.377032334 | 0.44  | 0.29  | 3.87E-11    | 15 AHNAK     |
| 3.27E-21 | 0.376870246 | 0.798 | 0.689 | 1.05E-16    | 15 MEF2A     |
| 2.34E-15 | 0.376778486 | 0.323 | 0.197 | 7.51E-11    | 15 MAPKBP1   |
| 4.61E-46 | 0.376463737 | 0.273 | 0.093 | 1.48E-41    | 15 SNX18     |
| 1.96E-29 | 0.375759785 | 0.336 | 0.161 | 6.29E-25    | 15 PLEKHH1   |
| 1.18E-32 | 0.372347472 | 0.26  | 0.104 | 3.79E-28    | 15 PLAC4     |
| 3.74E-24 | 0.372126232 | 0.895 | 0.82  | 1.20E-19    | 15 ARID1B    |
| 9.26E-19 | 0.371369903 | 0.767 | 0.627 | 2.97E-14    | 15 VPS13D    |
| 5.04E-26 | 0.371336164 | 0.274 | 0.124 | 1.62E-21    | 15 AMPD3     |
| 4.22E-16 | 0.369913196 | 0.814 | 0.694 | 1.35E-11    | 15 TRAPPC9   |
| 1.17E-17 | 0.368701609 | 0.727 | 0.587 | 3.76E-13    | 15 ZMYM4     |
| 5.87E-15 | 0.368466526 | 0.648 | 0.511 | 1.88E-10    | 15 DENND1B   |
| 7.57E-06 | 0.368220505 | 0.543 | 0.451 | 0.243067288 | 15 PALLD     |
| 5.35E-13 | 0.36821209  | 0.547 | 0.402 | 1.72E-08    | 15 GULP1     |
| 3.83E-29 | 0.3680766   | 0.251 | 0.104 | 1.23E-24    | 15 CLPB      |
| 4.62E-22 | 0.367332237 | 0.264 | 0.128 | 1.48E-17    | 15 BCL6      |
| 1.29E-22 | 0.366903527 | 0.298 | 0.151 | 4.14E-18    | 15 MUC20P1   |
| 6.27E-17 | 0.366786138 | 0.397 | 0.255 | 2.01E-12    | 15 DEAF1     |
| 1.44E-16 | 0.366464663 | 0.513 | 0.361 | 4.61E-12    | 15 RANBP9    |
| 8.67E-21 | 0.365360385 | 0.457 | 0.282 | 2.78E-16    | 15 SEC11A    |
| 8.86E-22 | 0.36390327  | 0.291 | 0.144 | 2.85E-17    | 15 GMPR      |

|          |             |       |       |             |               |
|----------|-------------|-------|-------|-------------|---------------|
| 1.55E-15 | 0.363723036 | 0.646 | 0.491 | 4.99E-11    | 15 ATXN10     |
| 8.69E-14 | 0.363682148 | 0.54  | 0.392 | 2.79E-09    | 15 DIAPH2     |
| 1.96E-36 | 0.363440122 | 0.33  | 0.139 | 6.29E-32    | 15 SLC16A5    |
| 4.11E-14 | 0.362939332 | 0.644 | 0.493 | 1.32E-09    | 15 COL4A4     |
| 9.66E-17 | 0.362170161 | 0.341 | 0.201 | 3.10E-12    | 15 AC139795.1 |
| 1.16E-16 | 0.361825542 | 0.648 | 0.483 | 3.73E-12    | 15 CLIP1      |
| 1.21E-18 | 0.361193759 | 0.354 | 0.204 | 3.88E-14    | 15 CAB39L     |
| 3.76E-35 | 0.359951796 | 0.556 | 0.301 | 1.21E-30    | 15 KLHL3      |
| 1.05E-16 | 0.359588779 | 0.574 | 0.434 | 3.39E-12    | 15 CCNT2      |
| 7.22E-37 | 0.357911462 | 0.251 | 0.093 | 2.32E-32    | 15 UBE2D1     |
| 1.24E-12 | 0.357505088 | 0.403 | 0.279 | 3.99E-08    | 15 SMAD1      |
| 1.70E-15 | 0.357101153 | 0.482 | 0.338 | 5.45E-11    | 15 TFG        |
| 2.45E-12 | 0.357083759 | 0.366 | 0.246 | 7.88E-08    | 15 TM9SF4     |
| 2.57E-28 | 0.356465879 | 0.345 | 0.162 | 8.26E-24    | 15 GCGR       |
| 2.03E-17 | 0.356183108 | 0.578 | 0.418 | 6.51E-13    | 15 FAM193A    |
| 4.33E-17 | 0.355906297 | 0.63  | 0.475 | 1.39E-12    | 15 RAB7A      |
| 1.93E-14 | 0.355041358 | 0.33  | 0.204 | 6.21E-10    | 15 METAP1     |
| 9.91E-10 | 0.353767368 | 0.352 | 0.249 | 3.18E-05    | 15 RHOA       |
| 2.65E-29 | 0.353634251 | 0.46  | 0.254 | 8.50E-25    | 15 THEM4      |
| 2.68E-13 | 0.353212572 | 0.551 | 0.414 | 8.60E-09    | 15 AF241726.1 |
| 5.09E-15 | 0.353016705 | 0.713 | 0.59  | 1.64E-10    | 15 RAPGEF6    |
| 2.15E-13 | 0.352876633 | 0.605 | 0.471 | 6.92E-09    | 15 SCFD2      |
| 9.60E-18 | 0.352266116 | 0.621 | 0.439 | 3.08E-13    | 15 RGL3       |
| 1.93E-12 | 0.352012575 | 0.424 | 0.298 | 6.21E-08    | 15 RTN3       |
| 5.34E-13 | 0.351724338 | 0.477 | 0.343 | 1.72E-08    | 15 ARIH2      |
| 2.30E-10 | 0.350263007 | 0.608 | 0.495 | 7.39E-06    | 15 ACBD6      |
| 3.53E-19 | 0.350079083 | 0.372 | 0.218 | 1.13E-14    | 15 WDR1       |
| 1.86E-17 | 0.349816491 | 0.605 | 0.44  | 5.97E-13    | 15 IQGAP1     |
| 1.41E-16 | 0.349534308 | 0.682 | 0.545 | 4.52E-12    | 15 UBE3C      |
| 3.99E-11 | 0.347199168 | 0.755 | 0.681 | 1.28E-06    | 15 EIF4G3     |
| 2.30E-17 | 0.347190417 | 0.444 | 0.287 | 7.38E-13    | 15 COX10      |
| 8.18E-20 | 0.3469883   | 0.63  | 0.466 | 2.63E-15    | 15 THRAP3     |
| 1.29E-11 | 0.3468877   | 0.507 | 0.384 | 4.14E-07    | 15 SLC25A27   |
| 6.61E-09 | 0.346568086 | 0.529 | 0.424 | 0.000212186 | 15 DAAM1      |
| 2.85E-19 | 0.345872649 | 0.596 | 0.422 | 9.16E-15    | 15 IL6ST      |
| 3.93E-17 | 0.345833172 | 0.52  | 0.368 | 1.26E-12    | 15 CACUL1     |
| 3.71E-16 | 0.345275452 | 0.54  | 0.387 | 1.19E-11    | 15 CPT1A      |
| 2.35E-29 | 0.345113373 | 0.338 | 0.161 | 7.56E-25    | 15 MACROH2A1  |
| 5.55E-20 | 0.345055797 | 0.309 | 0.163 | 1.78E-15    | 15 PGAP1      |
| 5.69E-16 | 0.343915022 | 0.547 | 0.396 | 1.83E-11    | 15 PSMD1      |
| 1.78E-18 | 0.342474377 | 0.646 | 0.48  | 5.72E-14    | 15 BRD4       |
| 6.21E-10 | 0.342377243 | 0.343 | 0.228 | 2.00E-05    | 15 TSPAN5     |
| 1.26E-09 | 0.342116386 | 0.291 | 0.195 | 4.05E-05    | 15 RMDN2      |
| 1.29E-18 | 0.341730564 | 0.406 | 0.252 | 4.16E-14    | 15 USP7       |
| 2.80E-11 | 0.340017536 | 0.616 | 0.486 | 8.99E-07    | 15 NDRG1      |
| 1.43E-18 | 0.339943719 | 0.635 | 0.449 | 4.60E-14    | 15 PPM1L      |
| 1.11E-27 | 0.339815324 | 0.296 | 0.137 | 3.58E-23    | 15 INTS7      |
| 1.40E-17 | 0.339592158 | 0.498 | 0.331 | 4.51E-13    | 15 DNAJB6     |
| 6.59E-15 | 0.339552205 | 0.661 | 0.526 | 2.12E-10    | 15 SMG6       |
| 7.67E-15 | 0.33954836  | 0.368 | 0.232 | 2.46E-10    | 15 MREG       |
| 7.45E-15 | 0.339452896 | 0.504 | 0.357 | 2.39E-10    | 15 ZNF10      |

|          |             |       |       |             |               |
|----------|-------------|-------|-------|-------------|---------------|
| 4.03E-22 | 0.338357021 | 0.397 | 0.222 | 1.29E-17    | 15 MAN1C1     |
| 8.30E-18 | 0.337973906 | 0.287 | 0.158 | 2.66E-13    | 15 GMCL1      |
| 1.86E-24 | 0.337360022 | 0.421 | 0.237 | 5.98E-20    | 15 RGPD2      |
| 8.89E-18 | 0.337275077 | 0.877 | 0.777 | 2.86E-13    | 15 USP34      |
| 5.60E-16 | 0.336511423 | 0.657 | 0.51  | 1.80E-11    | 15 RSRP1      |
| 9.73E-21 | 0.33628051  | 0.567 | 0.373 | 3.12E-16    | 15 VAV2       |
| 4.58E-16 | 0.336063538 | 0.285 | 0.164 | 1.47E-11    | 15 NUDT9      |
| 1.79E-13 | 0.33563238  | 0.865 | 0.783 | 5.76E-09    | 15 FGD4       |
| 2.11E-16 | 0.335449743 | 0.421 | 0.269 | 6.79E-12    | 15 GTF2F2     |
| 6.96E-31 | 0.335281212 | 0.325 | 0.145 | 2.24E-26    | 15 CAMK2N1    |
| 2.05E-18 | 0.33453049  | 0.857 | 0.78  | 6.57E-14    | 15 KMT2C      |
| 9.26E-42 | 0.334453796 | 0.28  | 0.102 | 2.97E-37    | 15 OSER1      |
| 6.92E-06 | 0.334350189 | 0.296 | 0.228 | 0.222260122 | 15 AL359710.1 |
| 7.14E-20 | 0.33427944  | 0.783 | 0.637 | 2.29E-15    | 15 GPBP1      |
| 1.62E-18 | 0.333907068 | 0.292 | 0.156 | 5.19E-14    | 15 EEPD1      |
| 4.58E-09 | 0.333373269 | 0.386 | 0.283 | 0.000147016 | 15 TEKT4P2    |
| 2.85E-11 | 0.333320522 | 0.617 | 0.49  | 9.16E-07    | 15 ZFHX3      |
| 3.99E-15 | 0.332916206 | 0.814 | 0.695 | 1.28E-10    | 15 NCOA1      |
| 6.24E-18 | 0.331837334 | 0.395 | 0.242 | 2.01E-13    | 15 PLIN5      |
| 5.21E-10 | 0.331190465 | 0.621 | 0.5   | 1.67E-05    | 15 FBXO34     |
| 3.40E-11 | 0.331038501 | 0.343 | 0.227 | 1.09E-06    | 15 SQSTM1     |
| 9.20E-17 | 0.32811945  | 0.401 | 0.248 | 2.96E-12    | 15 SIMC1      |
| 8.24E-17 | 0.32749605  | 0.372 | 0.225 | 2.65E-12    | 15 BDH1       |
| 5.21E-13 | 0.327214796 | 0.749 | 0.626 | 1.67E-08    | 15 PAFAH1B1   |
| 8.90E-13 | 0.326541265 | 0.599 | 0.457 | 2.86E-08    | 15 PCGF5      |
| 3.19E-12 | 0.326246085 | 0.383 | 0.257 | 1.03E-07    | 15 PRRG1      |
| 1.13E-11 | 0.326188954 | 0.623 | 0.502 | 3.62E-07    | 15 PTPN3      |
| 2.24E-09 | 0.326141475 | 0.771 | 0.675 | 7.19E-05    | 15 SHROOM3    |
| 2.29E-13 | 0.324756608 | 0.597 | 0.463 | 7.37E-09    | 15 SEC24B     |
| 1.25E-16 | 0.323759411 | 0.774 | 0.609 | 4.01E-12    | 15 TBC1D22A   |
| 2.01E-12 | 0.32337758  | 0.498 | 0.364 | 6.46E-08    | 15 UBE2G1     |
| 1.25E-14 | 0.323040136 | 0.525 | 0.375 | 4.00E-10    | 15 DERA       |
| 8.87E-12 | 0.322994797 | 0.473 | 0.346 | 2.85E-07    | 15 GPI        |
| 3.16E-14 | 0.322602835 | 0.718 | 0.595 | 1.01E-09    | 15 LCOR       |
| 4.06E-14 | 0.322532827 | 0.527 | 0.376 | 1.30E-09    | 15 TRAPPC12   |
| 6.32E-14 | 0.322292181 | 0.617 | 0.473 | 2.03E-09    | 15 FAM13B     |
| 2.15E-11 | 0.322270293 | 0.691 | 0.57  | 6.90E-07    | 15 ARID2      |
| 4.12E-18 | 0.322073257 | 0.859 | 0.707 | 1.32E-13    | 15 RBM47      |
| 4.40E-18 | 0.32201499  | 0.572 | 0.382 | 1.41E-13    | 15 EFHD1      |
| 2.57E-17 | 0.321620183 | 0.457 | 0.297 | 8.24E-13    | 15 PTPN9      |
| 1.58E-12 | 0.321551397 | 0.652 | 0.532 | 5.07E-08    | 15 NINL       |
| 2.56E-12 | 0.321342907 | 0.572 | 0.444 | 8.23E-08    | 15 OLA1       |
| 3.56E-11 | 0.321258413 | 0.621 | 0.494 | 1.14E-06    | 15 RSRC1      |
| 8.79E-15 | 0.321185614 | 0.708 | 0.57  | 2.82E-10    | 15 PHKB       |
| 3.70E-15 | 0.320893546 | 0.525 | 0.382 | 1.19E-10    | 15 MED27      |
| 1.39E-15 | 0.320850833 | 0.628 | 0.482 | 4.45E-11    | 15 TLK2       |
| 4.71E-11 | 0.320840257 | 0.572 | 0.448 | 1.51E-06    | 15 NCOA6      |
| 1.18E-14 | 0.320380092 | 0.291 | 0.169 | 3.78E-10    | 15 ZNF75A     |
| 1.43E-16 | 0.320251079 | 0.643 | 0.469 | 4.59E-12    | 15 CSNK2A1    |
| 2.85E-13 | 0.31919781  | 0.565 | 0.441 | 9.16E-09    | 15 SF1        |
| 1.87E-15 | 0.318934516 | 0.735 | 0.625 | 6.00E-11    | 15 COP1       |

|          |             |       |       |             |               |
|----------|-------------|-------|-------|-------------|---------------|
| 2.31E-26 | 0.317437988 | 0.265 | 0.116 | 7.43E-22    | 15 ITGB3      |
| 5.29E-12 | 0.317406788 | 0.697 | 0.554 | 1.70E-07    | 15 SRSF5      |
| 1.27E-14 | 0.317252519 | 0.635 | 0.496 | 4.07E-10    | 15 RPTOR      |
| 8.57E-14 | 0.316070903 | 0.839 | 0.738 | 2.75E-09    | 15 SPIDR      |
| 5.06E-12 | 0.315499121 | 0.733 | 0.626 | 1.62E-07    | 15 ARID4B     |
| 2.18E-12 | 0.315468384 | 0.527 | 0.399 | 6.99E-08    | 15 LYST       |
| 1.42E-16 | 0.315049024 | 0.403 | 0.254 | 4.55E-12    | 15 DEPDC5     |
| 5.09E-14 | 0.314497186 | 0.681 | 0.532 | 1.64E-09    | 15 PPP1R12B   |
| 8.08E-23 | 0.314151077 | 0.514 | 0.306 | 2.59E-18    | 15 UGT8       |
| 5.14E-09 | 0.313788091 | 0.619 | 0.515 | 0.000165019 | 15 ELF1       |
| 2.22E-13 | 0.313470388 | 0.287 | 0.172 | 7.12E-09    | 15 ECE1       |
| 1.11E-09 | 0.313391182 | 0.451 | 0.347 | 3.57E-05    | 15 DNAJC3     |
| 1.00E-14 | 0.312574316 | 0.39  | 0.253 | 3.21E-10    | 15 AC233699.1 |
| 8.60E-13 | 0.312234993 | 0.628 | 0.469 | 2.76E-08    | 15 SSBP2      |
| 4.11E-17 | 0.311936329 | 0.318 | 0.182 | 1.32E-12    | 15 TES        |
| 5.65E-12 | 0.31147053  | 0.565 | 0.428 | 1.81E-07    | 15 DNMI1L     |
| 3.93E-10 | 0.310066937 | 0.518 | 0.401 | 1.26E-05    | 15 LARP1B     |
| 1.65E-12 | 0.309835818 | 0.487 | 0.341 | 5.29E-08    | 15 CASZ1      |
| 5.41E-19 | 0.309763706 | 0.343 | 0.189 | 1.74E-14    | 15 PRKX       |
| 1.03E-14 | 0.308705799 | 0.569 | 0.412 | 3.32E-10    | 15 EZR        |
| 8.66E-07 | 0.308420126 | 0.354 | 0.271 | 0.027813793 | 15 KDM3A      |
| 2.71E-13 | 0.307836011 | 0.807 | 0.719 | 8.72E-09    | 15 EXOC6B     |
| 2.07E-11 | 0.306893544 | 0.487 | 0.36  | 6.64E-07    | 15 PDHX       |
| 2.00E-12 | 0.305646341 | 0.704 | 0.598 | 6.42E-08    | 15 KTN1       |
| 2.73E-11 | 0.305369673 | 0.28  | 0.176 | 8.76E-07    | 15 SBF2-AS1   |
| 3.56E-11 | 0.304912004 | 0.704 | 0.591 | 1.14E-06    | 15 ZNF407     |
| 1.60E-15 | 0.304878738 | 0.415 | 0.267 | 5.14E-11    | 15 JUP        |
| 2.18E-14 | 0.304708937 | 0.477 | 0.334 | 7.01E-10    | 15 NPEPPSP1   |
| 4.24E-10 | 0.30454281  | 0.457 | 0.342 | 1.36E-05    | 15 AGO2       |
| 2.95E-11 | 0.304454657 | 0.478 | 0.348 | 9.48E-07    | 15 CRPPA      |
| 1.39E-10 | 0.304156461 | 0.507 | 0.391 | 4.47E-06    | 15 MECP2      |
| 1.53E-18 | 0.303903815 | 0.372 | 0.221 | 4.93E-14    | 15 PMPCB      |
| 2.15E-25 | 0.303755475 | 0.886 | 0.738 | 6.91E-21    | 15 OXR1       |
| 1.60E-14 | 0.302416808 | 0.417 | 0.273 | 5.15E-10    | 15 EXT2       |
| 2.60E-16 | 0.301804812 | 0.471 | 0.316 | 8.34E-12    | 15 RHEB       |
| 4.44E-11 | 0.301243365 | 0.307 | 0.196 | 1.43E-06    | 15 EPN1       |
| 3.73E-11 | 0.300218977 | 0.745 | 0.644 | 1.20E-06    | 15 RAPGEF2    |
| 5.51E-13 | 0.298609401 | 0.803 | 0.704 | 1.77E-08    | 15 ITFG1      |
| 4.13E-12 | 0.298477056 | 0.679 | 0.55  | 1.33E-07    | 15 DIS3L2     |
| 9.82E-18 | 0.298000489 | 0.666 | 0.519 | 3.15E-13    | 15 RANBP2     |
| 7.75E-09 | 0.297348306 | 0.395 | 0.293 | 0.00024896  | 15 LINC01090  |
| 5.12E-08 | 0.296755573 | 0.468 | 0.363 | 0.001643027 | 15 IFRD1      |
| 4.20E-20 | 0.296225237 | 0.303 | 0.163 | 1.35E-15    | 15 PRKRA      |
| 8.79E-15 | 0.294779505 | 0.751 | 0.657 | 2.82E-10    | 15 UBR3       |
| 3.99E-11 | 0.293885551 | 0.594 | 0.463 | 1.28E-06    | 15 RNF130     |
| 2.68E-05 | 0.293458275 | 0.375 | 0.299 | 0.860331504 | 15 CEMIP2     |
| 6.49E-10 | 0.292609576 | 0.715 | 0.615 | 2.08E-05    | 15 GPATCH8    |
| 1.27E-16 | 0.292120866 | 0.256 | 0.137 | 4.07E-12    | 15 PLAG1      |
| 1.21E-13 | 0.291923376 | 0.352 | 0.227 | 3.89E-09    | 15 UGGT1      |
| 1.38E-17 | 0.291886963 | 0.273 | 0.143 | 4.43E-13    | 15 CTSB       |
| 4.39E-08 | 0.291418208 | 0.715 | 0.63  | 0.001411108 | 15 ZNF292     |



|          |             |       |       |             |               |
|----------|-------------|-------|-------|-------------|---------------|
| 2.08E-18 | 0.291405567 | 0.258 | 0.135 | 6.68E-14    | 15 TMEM33     |
| 1.18E-14 | 0.291348735 | 0.518 | 0.365 | 3.81E-10    | 15 CDC27      |
| 3.21E-10 | 0.290837683 | 0.46  | 0.337 | 1.03E-05    | 15 RALY       |
| 2.07E-11 | 0.290187561 | 0.356 | 0.239 | 6.63E-07    | 15 OCLN       |
| 7.38E-08 | 0.290007665 | 0.374 | 0.285 | 0.002369479 | 15 DYNC1LI2   |
| 3.85E-07 | 0.289959145 | 0.61  | 0.53  | 0.01235238  | 15 DCAF6      |
| 3.76E-09 | 0.28961363  | 0.641 | 0.531 | 0.000120893 | 15 KIF16B     |
| 1.36E-17 | 0.289535788 | 0.406 | 0.253 | 4.38E-13    | 15 SHTN1      |
| 2.32E-07 | 0.289518559 | 0.435 | 0.342 | 0.007435827 | 15 PIK3R1     |
| 3.40E-11 | 0.289370392 | 0.366 | 0.254 | 1.09E-06    | 15 LYPLA1     |
| 8.97E-13 | 0.289210847 | 0.655 | 0.519 | 2.88E-08    | 15 FBXW7      |
| 8.10E-15 | 0.288859055 | 0.538 | 0.363 | 2.60E-10    | 15 GRHL2      |
| 2.48E-11 | 0.288391322 | 0.412 | 0.273 | 7.97E-07    | 15 ZNF208     |
| 4.52E-13 | 0.288001767 | 0.581 | 0.444 | 1.45E-08    | 15 AC132008.2 |
| 3.01E-09 | 0.287337552 | 0.312 | 0.212 | 9.67E-05    | 15 AL713999.2 |
| 4.01E-13 | 0.2871851   | 0.608 | 0.448 | 1.29E-08    | 15 NNT        |
| 4.80E-15 | 0.286738621 | 0.421 | 0.265 | 1.54E-10    | 15 FAM189A1   |
| 4.64E-06 | 0.286007601 | 0.686 | 0.621 | 0.148950343 | 15 TBL1XR1    |
| 5.14E-08 | 0.285877874 | 0.3   | 0.205 | 0.001651225 | 15 FSTL4      |
| 4.39E-14 | 0.285484523 | 0.829 | 0.73  | 1.41E-09    | 15 STAG1      |
| 6.33E-13 | 0.285415284 | 0.738 | 0.611 | 2.03E-08    | 15 HNRNPH1    |
| 1.14E-21 | 0.2852922   | 0.664 | 0.432 | 3.67E-17    | 15 CLCNKB     |
| 5.28E-13 | 0.285150994 | 0.765 | 0.649 | 1.70E-08    | 15 ARHGEF12   |
| 3.67E-09 | 0.285021923 | 0.621 | 0.515 | 0.000117822 | 15 NEK7       |
| 1.77E-12 | 0.284809897 | 0.256 | 0.152 | 5.68E-08    | 15 OGFRL1     |
| 1.72E-14 | 0.284436278 | 0.392 | 0.258 | 5.52E-10    | 15 PDCD10     |
| 4.59E-10 | 0.28350659  | 0.449 | 0.332 | 1.48E-05    | 15 KPNA1      |
| 3.50E-12 | 0.282657916 | 0.756 | 0.642 | 1.12E-07    | 15 CSNK1A1    |
| 1.01E-11 | 0.282640176 | 0.617 | 0.487 | 3.25E-07    | 15 KIDINS220  |
| 2.05E-09 | 0.281772173 | 0.282 | 0.185 | 6.59E-05    | 15 SHROOM2    |
| 2.86E-13 | 0.281692444 | 0.46  | 0.325 | 9.20E-09    | 15 SEPTIN10   |
| 1.05E-13 | 0.281444979 | 0.291 | 0.172 | 3.38E-09    | 15 EEF1D      |
| 7.21E-17 | 0.281151804 | 0.278 | 0.154 | 2.32E-12    | 15 IDH3A      |
| 4.48E-07 | 0.280429622 | 0.287 | 0.199 | 0.014387848 | 15 ADGRF1     |
| 2.13E-13 | 0.280281033 | 0.413 | 0.274 | 6.84E-09    | 15 DNAJC5     |
| 2.02E-10 | 0.279045375 | 0.733 | 0.637 | 6.49E-06    | 15 USP25      |
| 1.44E-11 | 0.278846505 | 0.65  | 0.529 | 4.63E-07    | 15 CNOT4      |
| 3.36E-09 | 0.278814971 | 0.608 | 0.502 | 0.000107991 | 15 NAP1L4     |
| 1.01E-07 | 0.278796744 | 0.386 | 0.289 | 0.00325525  | 15 ADAM22     |
| 2.17E-12 | 0.278371265 | 0.753 | 0.634 | 6.96E-08    | 15 CDK13      |
| 7.14E-11 | 0.27828561  | 0.388 | 0.273 | 2.29E-06    | 15 AC104109.3 |
| 4.21E-17 | 0.278174747 | 0.325 | 0.187 | 1.35E-12    | 15 VDAC1      |
| 1.32E-12 | 0.278075743 | 0.514 | 0.372 | 4.24E-08    | 15 USP12      |
| 4.80E-09 | 0.277229248 | 0.608 | 0.501 | 0.0001543   | 15 AMBRA1     |
| 1.88E-23 | 0.27714229  | 0.269 | 0.124 | 6.04E-19    | 15 HLA-B      |
| 7.82E-13 | 0.276552284 | 0.439 | 0.298 | 2.51E-08    | 15 FZD6       |
| 1.44E-12 | 0.276257655 | 0.592 | 0.442 | 4.63E-08    | 15 USP32      |
| 7.63E-13 | 0.274756099 | 0.507 | 0.373 | 2.45E-08    | 15 FAR1       |
| 6.42E-10 | 0.274412815 | 0.769 | 0.658 | 2.06E-05    | 15 NSMCE2     |
| 1.34E-10 | 0.274288141 | 0.724 | 0.606 | 4.29E-06    | 15 AP000311.1 |
| 9.48E-15 | 0.274018738 | 0.307 | 0.177 | 3.04E-10    | 15 AHR        |

|          |             |       |       |             |               |
|----------|-------------|-------|-------|-------------|---------------|
| 1.48E-14 | 0.273844056 | 0.276 | 0.155 | 4.74E-10    | 15 DMTN       |
| 3.49E-10 | 0.273753067 | 0.309 | 0.203 | 1.12E-05    | 15 PLCH1      |
| 5.11E-08 | 0.272750143 | 0.552 | 0.46  | 0.001640389 | 15 CCDC50     |
| 9.93E-10 | 0.271284765 | 0.74  | 0.623 | 3.19E-05    | 15 PPP1R9A    |
| 3.25E-12 | 0.271051133 | 0.596 | 0.461 | 1.05E-07    | 15 SMC5       |
| 2.19E-13 | 0.270710019 | 0.486 | 0.337 | 7.04E-09    | 15 MPP7       |
| 1.95E-13 | 0.270707156 | 0.307 | 0.184 | 6.26E-09    | 15 ARAP1      |
| 2.56E-16 | 0.270084709 | 0.336 | 0.197 | 8.21E-12    | 15 DPY19L2P1  |
| 1.00E-12 | 0.26908683  | 0.3   | 0.184 | 3.22E-08    | 15 EIF1       |
| 7.70E-07 | 0.268842709 | 0.435 | 0.341 | 0.024727199 | 15 ATP8A1     |
| 4.02E-09 | 0.268839812 | 0.516 | 0.4   | 0.000128977 | 15 RCOR1      |
| 2.10E-06 | 0.268743341 | 0.529 | 0.435 | 0.06754333  | 15 SRGAP3     |
| 2.00E-08 | 0.268231578 | 0.554 | 0.44  | 0.00064258  | 15 AF127577.4 |
| 2.04E-10 | 0.267168964 | 0.43  | 0.306 | 6.55E-06    | 15 C1GALT1    |
| 4.96E-11 | 0.266775737 | 0.433 | 0.315 | 1.59E-06    | 15 USP10      |
| 1.22E-11 | 0.265473817 | 0.397 | 0.273 | 3.92E-07    | 15 MED14      |
| 3.12E-12 | 0.265188986 | 0.327 | 0.211 | 1.00E-07    | 15 USP42      |
| 7.37E-09 | 0.264484393 | 0.468 | 0.356 | 0.000236766 | 15 NRIP1      |
| 7.25E-09 | 0.262908486 | 0.599 | 0.484 | 0.000233    | 15 CYSTM1     |
| 1.34E-13 | 0.26272828  | 0.513 | 0.367 | 4.31E-09    | 15 PITPNB     |
| 1.08E-09 | 0.262498296 | 0.514 | 0.403 | 3.47E-05    | 15 SEPTIN7    |
| 2.21E-10 | 0.261531938 | 0.616 | 0.48  | 7.11E-06    | 15 STRBP      |
| 4.08E-12 | 0.261446712 | 0.448 | 0.314 | 1.31E-07    | 15 BEND7      |
| 1.26E-09 | 0.261261487 | 0.805 | 0.714 | 4.06E-05    | 15 NCOA2      |
| 1.24E-10 | 0.261144763 | 0.41  | 0.293 | 3.97E-06    | 15 CMC2       |
| 8.01E-10 | 0.260773076 | 0.561 | 0.424 | 2.57E-05    | 15 HLCS       |
| 4.04E-08 | 0.260479142 | 0.718 | 0.614 | 0.001297887 | 15 MNAT1      |
| 4.83E-14 | 0.259962472 | 0.475 | 0.326 | 1.55E-09    | 15 RAD23B     |
| 3.02E-08 | 0.259844949 | 0.628 | 0.535 | 0.000971116 | 15 ATAD2B     |
| 3.43E-10 | 0.259658256 | 0.621 | 0.491 | 1.10E-05    | 15 CLEC16A    |
| 2.45E-09 | 0.258824955 | 0.549 | 0.436 | 7.86E-05    | 15 RAB6A      |
| 2.27E-06 | 0.258686919 | 0.491 | 0.405 | 0.072996999 | 15 RYK        |
| 4.55E-09 | 0.258660944 | 0.57  | 0.455 | 0.000146109 | 15 GPATCH2    |
| 1.61E-09 | 0.25806616  | 0.648 | 0.523 | 5.18E-05    | 15 CUL3       |
| 1.91E-09 | 0.257921406 | 0.673 | 0.585 | 6.12E-05    | 15 HECTD1     |
| 4.75E-09 | 0.257884089 | 0.767 | 0.672 | 0.000152473 | 15 PDE8A      |
| 2.30E-06 | 0.257517608 | 0.661 | 0.569 | 0.073793971 | 15 NBAS       |
| 7.55E-13 | 0.257154074 | 0.319 | 0.203 | 2.43E-08    | 15 AC233968.1 |
| 3.69E-08 | 0.257150632 | 0.551 | 0.445 | 0.0011837   | 15 SCFD1      |
| 1.01E-11 | 0.257019608 | 0.475 | 0.347 | 3.23E-07    | 15 ATF2       |
| 3.29E-08 | 0.256722122 | 0.26  | 0.177 | 0.001057196 | 15 PDIA3      |
| 9.78E-13 | 0.25646229  | 0.491 | 0.345 | 3.14E-08    | 15 RBL2       |
| 8.10E-10 | 0.256313089 | 0.486 | 0.37  | 2.60E-05    | 15 B4GALT5    |
| 5.37E-09 | 0.256161171 | 0.374 | 0.274 | 0.000172418 | 15 OTUD4      |
| 5.32E-21 | 0.25603501  | 0.291 | 0.146 | 1.71E-16    | 15 HLA-C      |
| 9.58E-09 | 0.254575938 | 0.287 | 0.193 | 0.000307624 | 15 CALCOCO2   |
| 5.17E-14 | 0.253680354 | 0.574 | 0.417 | 1.66E-09    | 15 TRAPPC10   |
| 1.27E-11 | 0.25344034  | 0.662 | 0.544 | 4.07E-07    | 15 SMARCC1    |
| 1.15E-07 | 0.253043024 | 0.482 | 0.378 | 0.003697831 | 15 NAA35      |
| 1.81E-07 | 0.252876684 | 0.549 | 0.462 | 0.005801161 | 15 MTDH       |
| 1.07E-10 | 0.251755676 | 0.52  | 0.393 | 3.45E-06    | 15 TAF3       |

|           |             |       |       |             |              |
|-----------|-------------|-------|-------|-------------|--------------|
| 1.34E-09  | 0.251619838 | 0.5   | 0.384 | 4.29E-05    | 15 HDLBP     |
| 1.49E-13  | 0.251368568 | 0.502 | 0.354 | 4.78E-09    | 15 RAD54L2   |
| 1.87E-09  | 0.250660552 | 0.451 | 0.328 | 6.02E-05    | 15 METTL25   |
| 5.80E-08  | 0.250656068 | 0.54  | 0.433 | 0.001862151 | 15 CMTM4     |
| 3.93E-07  | 0.250448342 | 0.733 | 0.652 | 0.012634341 | 15 CTNNA1    |
| 2.01E-18  | 0.250298232 | 0.269 | 0.138 | 6.44E-14    | 15 TFDPI     |
| 7.28E-08  | 0.250205748 | 0.455 | 0.349 | 0.002339674 | 15 XRN2      |
| 0         | 4.304665703 | 0.864 | 0.049 | 0           | 16 ARHGAP15  |
| 0         | 3.961908885 | 0.805 | 0.035 | 0           | 16 PTPRC     |
| 0         | 3.499119555 | 0.722 | 0.04  | 0           | 16 PRKCB     |
| 0         | 3.277455735 | 0.728 | 0.087 | 0           | 16 CHST11    |
| 1.19E-135 | 3.136965715 | 0.391 | 0.059 | 3.82E-131   | 16 AOA1      |
| 5.72E-179 | 3.134459655 | 0.874 | 0.326 | 1.84E-174   | 16 ANKRD44   |
| 0         | 3.05687716  | 0.742 | 0.04  | 0           | 16 DOCK2     |
| 1.70E-301 | 3.046277365 | 0.613 | 0.07  | 5.45E-297   | 16 RIPOR2    |
| 4.65E-82  | 3.028542273 | 0.427 | 0.111 | 1.49E-77    | 16 AFF3      |
| 2.04E-21  | 2.99690584  | 0.295 | 0.139 | 6.56E-17    | 16 BANK1     |
| 0         | 2.954144942 | 0.321 | 0.01  | 0           | 16 THEMIS    |
| 3.63E-183 | 2.894502228 | 0.589 | 0.104 | 1.16E-178   | 16 FYN       |
| 0         | 2.893638427 | 0.662 | 0.006 | 0           | 16 IKZF1     |
| 0         | 2.715122411 | 0.656 | 0.052 | 0           | 16 INPP5D    |
| 6.74E-207 | 2.711232907 | 0.768 | 0.171 | 2.16E-202   | 16 ELMO1     |
| 7.74E-157 | 2.643354259 | 0.583 | 0.125 | 2.48E-152   | 16 SMAP2     |
| 2.63E-212 | 2.595723112 | 0.695 | 0.134 | 8.46E-208   | 16 CAMK1D    |
| 2.01E-223 | 2.588535959 | 0.275 | 0.017 | 6.45E-219   | 16 IFNG-AS1  |
| 0         | 2.540585643 | 0.536 | 0.034 | 0           | 16 ITGA4     |
| 1.40E-51  | 2.520804034 | 0.523 | 0.252 | 4.51E-47    | 16 PARP8     |
| 0         | 2.509624155 | 0.265 | 0.003 | 0           | 16 IL7R      |
| 6.84E-56  | 2.469001053 | 0.493 | 0.202 | 2.20E-51    | 16 PRKCH     |
| 2.78E-203 | 2.439082878 | 0.262 | 0.017 | 8.94E-199   | 16 LINC01934 |
| 0         | 2.383199687 | 0.599 | 0.054 | 0           | 16 FLI1      |
| 5.06E-252 | 2.358487652 | 0.344 | 0.024 | 1.62E-247   | 16 STAT4     |
| 2.48E-86  | 2.357668997 | 0.728 | 0.371 | 7.98E-82    | 16 PIP4K2A   |
| 3.58E-299 | 2.325979793 | 0.533 | 0.051 | 1.15E-294   | 16 CD44      |
| 4.17E-153 | 2.310308362 | 0.311 | 0.033 | 1.34E-148   | 16 CAMK4     |
| 2.63E-296 | 2.295955823 | 0.44  | 0.034 | 8.46E-292   | 16 FYB1      |
| 9.04E-256 | 2.283556547 | 0.308 | 0.019 | 2.90E-251   | 16 CD247     |
| 2.57E-194 | 2.266514061 | 0.715 | 0.149 | 8.24E-190   | 16 DOCK10    |
| 1.96E-245 | 2.264754604 | 0.818 | 0.155 | 6.31E-241   | 16 CELF2     |
| 1.06E-113 | 2.231176149 | 0.354 | 0.056 | 3.40E-109   | 16 HLA-DRB1  |
| 1.69E-305 | 2.196630556 | 0.517 | 0.047 | 5.43E-301   | 16 STK17B    |
| 1.28E-34  | 2.190234803 | 0.384 | 0.164 | 4.12E-30    | 16 ZEB2      |
| 2.00E-102 | 2.181654271 | 0.536 | 0.148 | 6.41E-98    | 16 TMEM131L  |
| 9.23E-114 | 2.150195217 | 0.43  | 0.084 | 2.96E-109   | 16 SEL1L3    |
| 8.94E-128 | 2.143220303 | 0.533 | 0.119 | 2.87E-123   | 16 TNFAIP8   |
| 1.41E-70  | 2.134754513 | 0.626 | 0.292 | 4.53E-66    | 16 CCND3     |
| 1.10E-106 | 2.117252171 | 0.715 | 0.253 | 3.52E-102   | 16 RUNX1     |
| 8.53E-85  | 2.105536221 | 0.52  | 0.166 | 2.74E-80    | 16 CLEC2D    |
| 1.76E-164 | 2.078154984 | 0.272 | 0.023 | 5.65E-160   | 16 WDFY4     |
| 2.98E-33  | 2.069656313 | 0.301 | 0.108 | 9.59E-29    | 16 A2M       |
| 1.44E-41  | 2.060265875 | 0.487 | 0.243 | 4.61E-37    | 16 JAZF1     |

|           |             |       |       |           |               |
|-----------|-------------|-------|-------|-----------|---------------|
| 0         | 2.045835222 | 0.401 | 0.018 | 0         | 16 CARD11     |
| 1.25E-258 | 2.045569281 | 0.364 | 0.026 | 4.03E-254 | 16 SAMSN1     |
| 8.82E-77  | 2.044859928 | 0.401 | 0.099 | 2.83E-72  | 16 PAG1       |
| 1.81E-148 | 2.033252933 | 0.474 | 0.08  | 5.80E-144 | 16 CYTIP      |
| 7.91E-207 | 2.028256781 | 0.48  | 0.059 | 2.54E-202 | 16 IFI16      |
| 1.15E-103 | 2.028165905 | 0.695 | 0.251 | 3.68E-99  | 16 DOCK8      |
| 6.88E-98  | 2.027680307 | 0.55  | 0.162 | 2.21E-93  | 16 SH3KBP1    |
| 1.69E-255 | 2.025082569 | 0.45  | 0.042 | 5.42E-251 | 16 ARHGAP25   |
| 5.56E-252 | 2.023355793 | 0.328 | 0.022 | 1.79E-247 | 16 BCL11B     |
| 6.31E-97  | 2.020981619 | 0.603 | 0.209 | 2.03E-92  | 16 STK4       |
| 0         | 2.0176459   | 0.394 | 0.005 | 0         | 16 RHOH       |
| 0         | 2.016080715 | 0.454 | 0.008 | 0         | 16 CD53       |
| 0         | 2.014544898 | 0.315 | 0.01  | 0         | 16 ITK        |
| 5.34E-59  | 2.004677048 | 0.44  | 0.149 | 1.71E-54  | 16 ETS1       |
| 5.81E-42  | 2.000333217 | 0.348 | 0.122 | 1.87E-37  | 16 LYN        |
| 2.38E-90  | 1.996826182 | 0.315 | 0.055 | 7.65E-86  | 16 CD96       |
| 1.07E-249 | 1.988326998 | 0.503 | 0.054 | 3.43E-245 | 16 PREX1      |
| 1.39E-37  | 1.977131663 | 0.321 | 0.112 | 4.47E-33  | 16 TBXAS1     |
| 4.46E-54  | 1.960019266 | 0.285 | 0.069 | 1.43E-49  | 16 KCNQ5      |
| 3.08E-181 | 1.959835233 | 0.48  | 0.067 | 9.88E-177 | 16 APBB1IP    |
| 5.27E-67  | 1.952186081 | 0.672 | 0.366 | 1.69E-62  | 16 FNBP1      |
| 5.26E-88  | 1.940108559 | 0.48  | 0.128 | 1.69E-83  | 16 SLC9A9     |
| 8.76E-57  | 1.93418189  | 0.725 | 0.544 | 2.81E-52  | 16 SMCHD1     |
| 0         | 1.932937578 | 0.361 | 0.008 | 0         | 16 IKZF3      |
| 1.05E-51  | 1.927001152 | 0.695 | 0.474 | 3.38E-47  | 16 FCHSD2     |
| 3.46E-31  | 1.926508093 | 0.566 | 0.368 | 1.11E-26  | 16 MGAT5      |
| 2.18E-28  | 1.917866431 | 0.464 | 0.26  | 6.99E-24  | 16 PDE3B      |
| 7.85E-199 | 1.915641486 | 0.262 | 0.017 | 2.52E-194 | 16 CD69       |
| 1.41E-78  | 1.911912376 | 0.808 | 0.554 | 4.52E-74  | 16 FOXN3      |
| 6.20E-34  | 1.889373653 | 0.619 | 0.475 | 1.99E-29  | 16 ETV6       |
| 1.51E-96  | 1.888801465 | 0.424 | 0.093 | 4.86E-92  | 16 XYLT1      |
| 9.03E-89  | 1.872605424 | 0.311 | 0.054 | 2.90E-84  | 16 ADAM28     |
| 2.52E-302 | 1.869339914 | 0.427 | 0.031 | 8.09E-298 | 16 AKNA       |
| 7.49E-163 | 1.865019945 | 0.258 | 0.021 | 2.40E-158 | 16 SRGN       |
| 1.11E-75  | 1.862822768 | 0.328 | 0.069 | 3.56E-71  | 16 CD74       |
| 0         | 1.857108001 | 0.374 | 0.01  | 0         | 16 EMB        |
| 0         | 1.839957779 | 0.351 | 0.011 | 0         | 16 SP140      |
| 3.84E-141 | 1.835094201 | 0.52  | 0.1   | 1.23E-136 | 16 DOCK11     |
| 0         | 1.831609309 | 0.334 | 0.006 | 0         | 16 PIK3R5     |
| 5.20E-98  | 1.816826722 | 0.331 | 0.056 | 1.67E-93  | 16 AC009093.8 |
| 6.73E-29  | 1.80439569  | 0.351 | 0.159 | 2.16E-24  | 16 TTC39C     |
| 2.62E-74  | 1.795440545 | 0.341 | 0.076 | 8.42E-70  | 16 PDE4B      |
| 3.07E-92  | 1.762274802 | 0.272 | 0.039 | 9.85E-88  | 16 HLA-DRB5   |
| 1.80E-24  | 1.740080098 | 0.288 | 0.121 | 5.80E-20  | 16 SYTL3      |
| 2.83E-165 | 1.737518508 | 0.308 | 0.03  | 9.09E-161 | 16 GNG2       |
| 1.96E-29  | 1.735211914 | 0.533 | 0.326 | 6.30E-25  | 16 LDLRAD4    |
| 2.38E-50  | 1.734214059 | 0.652 | 0.415 | 7.63E-46  | 16 CYTH1      |
| 2.53E-224 | 1.729498964 | 0.298 | 0.02  | 8.13E-220 | 16 SLFN12L    |
| 4.09E-46  | 1.721988199 | 0.672 | 0.47  | 1.31E-41  | 16 CDC42SE2   |
| 1.12E-194 | 1.717636885 | 0.364 | 0.035 | 3.60E-190 | 16 C22orf34   |
| 8.67E-32  | 1.716955358 | 0.589 | 0.452 | 2.78E-27  | 16 PPP2R5C    |

|           |             |       |       |           |              |
|-----------|-------------|-------|-------|-----------|--------------|
| 8.22E-75  | 1.710522291 | 0.864 | 0.742 | 2.64E-70  | 16 MBNL1     |
| 1.10E-101 | 1.710519004 | 0.387 | 0.074 | 3.54E-97  | 16 NFATC2    |
| 0         | 1.710049907 | 0.341 | 0.013 | 0         | 16 LCPI      |
| 0         | 1.703787011 | 0.344 | 0.003 | 0         | 16 TMC8      |
| 4.82E-224 | 1.696473472 | 0.258 | 0.015 | 1.55E-219 | 16 CYRIA     |
| 6.59E-241 | 1.684451521 | 0.348 | 0.025 | 2.12E-236 | 16 P2RY8     |
| 0         | 1.682976223 | 0.325 | 0.012 | 0         | 16 RCSD1     |
| 5.08E-45  | 1.677030598 | 0.285 | 0.079 | 1.63E-40  | 16 CIITA     |
| 8.46E-89  | 1.676175609 | 0.401 | 0.09  | 2.72E-84  | 16 STK10     |
| 7.44E-89  | 1.66747192  | 0.374 | 0.078 | 2.39E-84  | 16 RASSF3    |
| 1.86E-114 | 1.663415271 | 0.358 | 0.057 | 5.97E-110 | 16 RASA3     |
| 3.12E-33  | 1.656341475 | 0.593 | 0.42  | 1.00E-28  | 16 RAPGEF1   |
| 4.53E-22  | 1.646430839 | 0.331 | 0.164 | 1.45E-17  | 16 MARCHF1   |
| 1.15E-92  | 1.633063998 | 0.298 | 0.048 | 3.69E-88  | 16 ADAM19    |
| 1.36E-43  | 1.63223912  | 0.497 | 0.241 | 4.37E-39  | 16 CEP85L    |
| 1.54E-22  | 1.621769484 | 0.47  | 0.306 | 4.94E-18  | 16 SFMBT2    |
| 1.56E-108 | 1.619693061 | 0.275 | 0.035 | 5.00E-104 | 16 NIBAN1    |
| 1.54E-24  | 1.61081386  | 0.411 | 0.223 | 4.93E-20  | 16 MEF2C     |
| 4.69E-214 | 1.61059591  | 0.305 | 0.022 | 1.51E-209 | 16 ITGAL     |
| 1.06E-22  | 1.608816535 | 0.321 | 0.155 | 3.41E-18  | 16 GRK3      |
| 0         | 1.580050873 | 0.311 | 0.005 | 0         | 16 IL10RA    |
| 2.14E-208 | 1.564714108 | 0.288 | 0.02  | 6.87E-204 | 16 TMEM156   |
| 1.71E-35  | 1.559492285 | 0.411 | 0.185 | 5.48E-31  | 16 NEDD9     |
| 3.84E-39  | 1.552681487 | 0.411 | 0.162 | 1.23E-34  | 16 PPP1R16B  |
| 8.85E-57  | 1.552488255 | 0.331 | 0.087 | 2.84E-52  | 16 PVT1      |
| 0         | 1.551405581 | 0.295 | 0.009 | 0         | 16 LCP2      |
| 6.47E-22  | 1.5490085   | 0.437 | 0.273 | 2.08E-17  | 16 VOPP1     |
| 0         | 1.548984621 | 0.252 | 0.005 | 0         | 16 ZNF831    |
| 2.60E-40  | 1.548239251 | 0.517 | 0.271 | 8.35E-36  | 16 RESF1     |
| 1.45E-71  | 1.543106337 | 0.411 | 0.112 | 4.66E-67  | 16 CCDC88C   |
| 2.60E-36  | 1.53680184  | 0.623 | 0.462 | 8.34E-32  | 16 ATM       |
| 3.02E-45  | 1.534944019 | 0.639 | 0.348 | 9.71E-41  | 16 ST6GAL1   |
| 4.54E-195 | 1.520959721 | 0.305 | 0.024 | 1.46E-190 | 16 POU2F2    |
| 1.38E-44  | 1.517338811 | 0.735 | 0.612 | 4.42E-40  | 16 TBC1D22A  |
| 2.43E-41  | 1.512326952 | 0.394 | 0.156 | 7.81E-37  | 16 PTK2B     |
| 4.72E-21  | 1.495611489 | 0.328 | 0.157 | 1.52E-16  | 16 HDAC9     |
| 3.37E-60  | 1.494203181 | 0.805 | 0.603 | 1.08E-55  | 16 UTRN      |
| 2.15E-46  | 1.483574616 | 0.262 | 0.065 | 6.90E-42  | 16 DISC1     |
| 1.78E-36  | 1.478570198 | 0.404 | 0.177 | 5.73E-32  | 16 B2M       |
| 0         | 1.47474625  | 0.308 | 0.003 | 0         | 16 NCKAP1L   |
| 4.38E-39  | 1.468730231 | 0.421 | 0.18  | 1.41E-34  | 16 ZC3HAV1   |
| 8.93E-42  | 1.467167884 | 0.444 | 0.197 | 2.87E-37  | 16 SEPTIN6   |
| 9.75E-33  | 1.46565326  | 0.493 | 0.276 | 3.13E-28  | 16 STIM1     |
| 1.06E-23  | 1.458837176 | 0.566 | 0.452 | 3.41E-19  | 16 NCOA3     |
| 1.47E-218 | 1.449037829 | 0.325 | 0.024 | 4.72E-214 | 16 TRAF3IP3  |
| 6.73E-10  | 1.448844615 | 0.513 | 0.512 | 2.16E-05  | 16 SKAP1     |
| 1.67E-40  | 1.44819976  | 0.447 | 0.186 | 5.35E-36  | 16 PCED1B    |
| 0         | 1.444015762 | 0.328 | 0.013 | 0         | 16 HCLS1     |
| 3.08E-29  | 1.441041673 | 0.427 | 0.222 | 9.90E-25  | 16 CCM2      |
| 7.83E-38  | 1.435197472 | 0.427 | 0.19  | 2.51E-33  | 16 MYO9B     |
| 1.54E-16  | 1.424928301 | 0.281 | 0.142 | 4.95E-12  | 16 LINC01619 |

|           |             |       |       |             |               |
|-----------|-------------|-------|-------|-------------|---------------|
| 1.01E-40  | 1.414268871 | 0.487 | 0.229 | 3.25E-36    | 16 AC010894.2 |
| 4.86E-42  | 1.413302209 | 0.272 | 0.076 | 1.56E-37    | 16 RIN3       |
| 6.08E-76  | 1.412189686 | 0.301 | 0.058 | 1.95E-71    | 16 MYO1F      |
| 1.29E-93  | 1.409437871 | 0.331 | 0.058 | 4.14E-89    | 16 NLRC5      |
| 2.14E-16  | 1.407845896 | 0.513 | 0.398 | 6.89E-12    | 16 PITPNC1    |
| 6.20E-289 | 1.401132616 | 0.278 | 0.013 | 1.99E-284   | 16 ST8SIA4    |
| 2.70E-26  | 1.384737413 | 0.629 | 0.536 | 8.67E-22    | 16 DPYD       |
| 1.79E-19  | 1.37707703  | 0.639 | 0.597 | 5.74E-15    | 16 EML4       |
| 3.11E-15  | 1.371247491 | 0.421 | 0.295 | 1.00E-10    | 16 FUT8       |
| 1.91E-21  | 1.370156706 | 0.364 | 0.197 | 6.14E-17    | 16 PDCD4      |
| 3.12E-10  | 1.35945783  | 0.566 | 0.549 | 1.00E-05    | 16 BCL2       |
| 2.74E-37  | 1.359125355 | 0.265 | 0.079 | 8.79E-33    | 16 MCUB       |
| 1.21E-19  | 1.354046833 | 0.391 | 0.239 | 3.90E-15    | 16 NCK2       |
| 3.61E-13  | 1.34251612  | 0.513 | 0.438 | 1.16E-08    | 16 CNOT6L     |
| 9.93E-23  | 1.333516914 | 0.543 | 0.42  | 3.19E-18    | 16 RASA2      |
| 5.53E-11  | 1.331732532 | 0.421 | 0.346 | 1.77E-06    | 16 ARAP2      |
| 6.36E-11  | 1.329966123 | 0.252 | 0.147 | 2.04E-06    | 16 TC2N       |
| 1.13E-41  | 1.323780632 | 0.288 | 0.085 | 3.62E-37    | 16 PIK3CD     |
| 1.92E-24  | 1.317713225 | 0.414 | 0.234 | 6.16E-20    | 16 STK17A     |
| 6.06E-46  | 1.317625975 | 0.305 | 0.089 | 1.94E-41    | 16 AL159163.1 |
| 2.77E-53  | 1.315585852 | 0.272 | 0.063 | 8.90E-49    | 16 ANTXR2     |
| 1.52E-06  | 1.315464207 | 0.305 | 0.24  | 0.048745097 | 16 SERINC5    |
| 1.36E-24  | 1.313569471 | 0.397 | 0.214 | 4.37E-20    | 16 AP000295.1 |
| 3.67E-11  | 1.3024312   | 0.374 | 0.261 | 1.18E-06    | 16 TNIK       |
| 5.68E-38  | 1.300215468 | 0.295 | 0.092 | 1.83E-33    | 16 GRK5       |
| 9.82E-19  | 1.295132335 | 0.48  | 0.348 | 3.15E-14    | 16 PDE7A      |
| 1.58E-23  | 1.294643273 | 0.43  | 0.256 | 5.07E-19    | 16 TRAF3      |
| 3.88E-17  | 1.293932428 | 0.444 | 0.318 | 1.25E-12    | 16 RPS6KA3    |
| 1.71E-30  | 1.282798895 | 0.387 | 0.181 | 5.50E-26    | 16 CNTRL      |
| 6.19E-79  | 1.281199661 | 0.295 | 0.053 | 1.99E-74    | 16 NLRP1      |
| 1.62E-29  | 1.273226658 | 0.407 | 0.202 | 5.21E-25    | 16 NIN        |
| 2.50E-200 | 1.270102443 | 0.268 | 0.018 | 8.04E-196   | 16 CD37       |
| 3.57E-19  | 1.259127748 | 0.394 | 0.237 | 1.15E-14    | 16 EVL        |
| 5.04E-18  | 1.247484705 | 0.454 | 0.305 | 1.62E-13    | 16 NR3C1      |
| 5.83E-26  | 1.246465116 | 0.474 | 0.282 | 1.87E-21    | 16 INPP4A     |
| 5.23E-21  | 1.24288269  | 0.328 | 0.166 | 1.68E-16    | 16 RAB8B      |
| 1.83E-38  | 1.238502791 | 0.838 | 0.781 | 5.87E-34    | 16 FOXP1      |
| 1.98E-97  | 1.237466861 | 0.281 | 0.04  | 6.35E-93    | 16 GVINP1     |
| 5.48E-34  | 1.236242735 | 0.748 | 0.695 | 1.76E-29    | 16 AKAP13     |
| 6.47E-32  | 1.236003124 | 0.325 | 0.125 | 2.08E-27    | 16 HLA-B      |
| 1.90E-17  | 1.227484097 | 0.457 | 0.321 | 6.11E-13    | 16 PARP14     |
| 4.02E-32  | 1.223014365 | 0.252 | 0.079 | 1.29E-27    | 16 SIDT1      |
| 4.19E-06  | 1.222321838 | 0.414 | 0.402 | 0.134661775 | 16 LYST       |
| 7.18E-12  | 1.216408867 | 0.553 | 0.522 | 2.31E-07    | 16 FBXW7      |
| 1.67E-20  | 1.211674501 | 0.596 | 0.52  | 5.35E-16    | 16 PACS1      |
| 6.39E-26  | 1.202415437 | 0.288 | 0.115 | 2.05E-21    | 16 SP110      |
| 1.17E-09  | 1.196955371 | 0.43  | 0.372 | 3.76E-05    | 16 MBP        |
| 5.30E-20  | 1.186925145 | 0.626 | 0.574 | 1.70E-15    | 16 SSH2       |
| 1.16E-14  | 1.186864988 | 0.285 | 0.153 | 3.73E-10    | 16 MCTP2      |
| 8.36E-13  | 1.181720947 | 0.391 | 0.289 | 2.68E-08    | 16 GRB2       |
| 9.50E-34  | 1.176749846 | 0.295 | 0.102 | 3.05E-29    | 16 ARHGEF1    |

|            |             |       |       |             |               |
|------------|-------------|-------|-------|-------------|---------------|
| 3.63E-08   | 1.173267821 | 0.374 | 0.309 | 0.001165045 | 16 AC008878.3 |
| 2.69E-13   | 1.169106138 | 0.288 | 0.162 | 8.65E-09    | 16 TRERF1     |
| 1.38E-109  | 1.166682756 | 0.255 | 0.03  | 4.42E-105   | 16 ATP2A3     |
| 0.00012262 | 1.164033642 | 0.344 | 0.3   | 1           | 16 CEMIP2     |
| 1.70E-10   | 1.158800976 | 0.411 | 0.341 | 5.45E-06    | 16 LINC00869  |
| 3.19E-17   | 1.157324036 | 0.308 | 0.164 | 1.02E-12    | 16 IQSEC1     |
| 3.53E-18   | 1.156387668 | 0.354 | 0.207 | 1.13E-13    | 16 CD47       |
| 5.12E-43   | 1.154122754 | 0.311 | 0.093 | 1.64E-38    | 16 HLA-E      |
| 7.77E-09   | 1.153993741 | 0.483 | 0.471 | 0.000249672 | 16 CASK       |
| 1.32E-31   | 1.153729929 | 0.278 | 0.096 | 4.25E-27    | 16 PRKY       |
| 4.87E-24   | 1.152485152 | 0.325 | 0.148 | 1.56E-19    | 16 HLA-C      |
| 3.24E-14   | 1.151598936 | 0.464 | 0.348 | 1.04E-09    | 16 SLC38A1    |
| 1.61E-09   | 1.150665943 | 0.301 | 0.209 | 5.18E-05    | 16 REL        |
| 2.53E-24   | 1.143795261 | 0.573 | 0.439 | 8.13E-20    | 16 SP100      |
| 6.62E-22   | 1.142646713 | 0.599 | 0.519 | 2.13E-17    | 16 MYCBP2     |
| 9.80E-19   | 1.138745076 | 0.364 | 0.206 | 3.15E-14    | 16 TPK1       |
| 3.61E-14   | 1.129310542 | 0.447 | 0.343 | 1.16E-09    | 16 MAP4K4     |
| 6.95E-16   | 1.129256086 | 0.272 | 0.135 | 2.23E-11    | 16 DIPK1A     |
| 3.16E-14   | 1.128893044 | 0.295 | 0.167 | 1.01E-09    | 16 DGKD       |
| 2.73E-22   | 1.127769743 | 0.285 | 0.125 | 8.78E-18    | 16 AC092821.3 |
| 1.34E-06   | 1.127197981 | 0.411 | 0.394 | 0.04299605  | 16 RNF149     |
| 8.96E-36   | 1.126307138 | 0.295 | 0.096 | 2.88E-31    | 16 FGD3       |
| 6.61E-08   | 1.124549664 | 0.291 | 0.209 | 0.002122547 | 16 PRKCCQ     |
| 1.55E-18   | 1.120743614 | 0.427 | 0.287 | 4.98E-14    | 16 ARPC2      |
| 2.44E-12   | 1.115273949 | 0.5   | 0.438 | 7.84E-08    | 16 RAP1A      |
| 5.96E-14   | 1.110985969 | 0.457 | 0.35  | 1.91E-09    | 16 ABHD15-AS1 |
| 6.26E-07   | 1.109350985 | 0.331 | 0.27  | 0.020101324 | 16 KAT2B      |
| 1.09E-07   | 1.109029886 | 0.348 | 0.281 | 0.003494586 | 16 SORL1      |
| 1.76E-11   | 1.106310364 | 0.331 | 0.218 | 5.64E-07    | 16 SYK        |
| 4.90E-12   | 1.106078199 | 0.295 | 0.182 | 1.57E-07    | 16 TMEM181    |
| 1.04E-08   | 1.103741439 | 0.391 | 0.328 | 0.000333752 | 16 PRDM2      |
| 1.62E-17   | 1.103232177 | 0.331 | 0.184 | 5.22E-13    | 16 CYLD       |
| 3.25E-16   | 1.092081003 | 0.51  | 0.379 | 1.04E-11    | 16 IQGAP2     |
| 0.00019573 | 1.091547778 | 0.56  | 0.618 | 1           | 16 SIPA1L1    |
| 1.44E-12   | 1.086849079 | 0.278 | 0.162 | 4.63E-08    | 16 SARAF      |
| 1.77E-15   | 1.083452419 | 0.258 | 0.129 | 5.68E-11    | 16 TRAF5      |
| 8.70E-18   | 1.083197254 | 0.55  | 0.461 | 2.79E-13    | 16 JAK1       |
| 1.17E-33   | 1.076443576 | 0.735 | 0.669 | 3.74E-29    | 16 ANKRD11    |
| 8.77E-66   | 1.069044024 | 0.272 | 0.053 | 2.82E-61    | 16 ARHGEF6    |
| 5.11E-33   | 1.063065715 | 0.785 | 0.804 | 1.64E-28    | 16 TNRC6B     |
| 8.27E-07   | 1.060500902 | 0.404 | 0.364 | 0.026548074 | 16 NOTCH2     |
| 1.15E-08   | 1.057198094 | 0.457 | 0.423 | 0.00037002  | 16 EPB41      |
| 2.45E-12   | 1.05011807  | 0.374 | 0.263 | 7.87E-08    | 16 MANBA      |
| 1.08E-10   | 1.046692791 | 0.603 | 0.614 | 3.47E-06    | 16 KLF12      |
| 1.32E-06   | 1.043785372 | 0.391 | 0.344 | 0.042516736 | 16 PIK3R1     |
| 4.27E-15   | 1.040076862 | 0.626 | 0.642 | 1.37E-10    | 16 KDM4C      |
| 4.19E-07   | 1.038872355 | 0.437 | 0.407 | 0.013449447 | 16 CAMK2D     |
| 3.70E-22   | 1.03626098  | 0.288 | 0.127 | 1.19E-17    | 16 TTC13      |
| 5.12E-07   | 1.033943326 | 0.331 | 0.269 | 0.016429186 | 16 PABPC1     |
| 6.28E-13   | 1.027512447 | 0.444 | 0.346 | 2.02E-08    | 16 SEMA4D     |
| 8.26E-15   | 1.027344116 | 0.334 | 0.196 | 2.65E-10    | 16 RPS6KA5    |

|            |             |       |       |             |               |
|------------|-------------|-------|-------|-------------|---------------|
| 3.78E-11   | 1.025709949 | 0.46  | 0.372 | 1.21E-06    | 16 DLEU2      |
| 9.69E-15   | 1.017188098 | 0.255 | 0.13  | 3.11E-10    | 16 ARNTL      |
| 1.08E-15   | 1.016057737 | 0.318 | 0.18  | 3.46E-11    | 16 CARD8      |
| 4.93E-27   | 1.012381652 | 0.844 | 0.806 | 1.58E-22    | 16 AC016831.6 |
| 2.50E-12   | 1.011456398 | 0.56  | 0.525 | 8.03E-08    | 16 ANKRD36    |
| 2.32E-09   | 1.010640405 | 0.52  | 0.519 | 7.44E-05    | 16 TAOK3      |
| 5.61E-11   | 1.004317743 | 0.5   | 0.461 | 1.80E-06    | 16 NBPF19     |
| 0.00861514 | 1.004139777 | 0.351 | 0.346 | 1           | 16 GLCC11     |
| 2.17E-28   | 1.002856745 | 0.258 | 0.088 | 6.98E-24    | 16 KCNAB2     |
| 2.79E-60   | 1.000991094 | 1     | 0.999 | 8.97E-56    | 16 FP671120.7 |
| 3.07E-30   | 0.997459896 | 0.275 | 0.097 | 9.85E-26    | 16 SP140L     |
| 2.06E-23   | 0.996814575 | 0.285 | 0.119 | 6.63E-19    | 16 HLA-A      |
| 1.39E-14   | 0.992001197 | 0.387 | 0.256 | 4.46E-10    | 16 ELOVL5     |
| 5.10E-08   | 0.991912905 | 0.54  | 0.547 | 0.001639329 | 16 CMIP       |
| 7.11E-30   | 0.989332786 | 1     | 0.998 | 2.28E-25    | 16 HFM1       |
| 3.19E-05   | 0.978605817 | 0.308 | 0.251 | 1           | 16 HIVEP3     |
| 0.00552449 | 0.97551     | 0.43  | 0.683 | 1           | 16 ARHGAP24   |
| 9.08E-11   | 0.967287593 | 0.543 | 0.54  | 2.92E-06    | 16 USP15      |
| 2.47E-08   | 0.965853465 | 0.517 | 0.534 | 0.000793801 | 16 UBAC2      |
| 2.72E-06   | 0.962104133 | 0.404 | 0.373 | 0.08742827  | 16 TANK       |
| 3.57E-12   | 0.960772031 | 0.272 | 0.157 | 1.15E-07    | 16 MIATNB     |
| 1.34E-18   | 0.956913    | 0.623 | 0.54  | 4.30E-14    | 16 CYRIB      |
| 2.17E-10   | 0.955472273 | 0.573 | 0.588 | 6.98E-06    | 16 PCNX1      |
| 1.77E-10   | 0.955357528 | 0.411 | 0.306 | 5.68E-06    | 16 SRGAP2     |
| 1.05E-05   | 0.955045537 | 0.427 | 0.413 | 0.335716679 | 16 GPCPD1     |
| 3.06E-10   | 0.952225456 | 0.295 | 0.19  | 9.81E-06    | 16 NUP210     |
| 0.00116694 | 0.949531007 | 0.391 | 0.407 | 1           | 16 EHMT1      |
| 2.14E-13   | 0.943999032 | 0.566 | 0.514 | 6.88E-09    | 16 ANKRD36C   |
| 2.34E-10   | 0.941332491 | 0.338 | 0.23  | 7.52E-06    | 16 MDFIC      |
| 1.03E-07   | 0.936021032 | 0.308 | 0.23  | 0.003318021 | 16 STRADA     |
| 7.50E-06   | 0.930637017 | 0.474 | 0.493 | 0.240911527 | 16 ATF7IP     |
| 6.64E-05   | 0.929341899 | 0.328 | 0.284 | 1           | 16 CDC14A     |
| 2.38E-07   | 0.927584777 | 0.328 | 0.246 | 0.007646877 | 16 ABR        |
| 2.69E-05   | 0.918090024 | 0.43  | 0.426 | 0.865438552 | 16 MAP3K1     |
| 4.86E-06   | 0.912963573 | 0.487 | 0.505 | 0.156166728 | 16 NBPF14     |
| 3.00E-05   | 0.91203688  | 0.338 | 0.304 | 0.963980392 | 16 XPO6       |
| 1.51E-10   | 0.901264906 | 0.556 | 0.545 | 4.84E-06    | 16 DENND4A    |
| 0.00014311 | 0.899999253 | 0.417 | 0.426 | 1           | 16 ATP2B1     |
| 8.90E-06   | 0.899371592 | 0.391 | 0.363 | 0.285948185 | 16 LINC01145  |
| 1.08E-11   | 0.899204188 | 0.56  | 0.523 | 3.46E-07    | 16 ITSN2      |
| 8.92E-05   | 0.896649787 | 0.255 | 0.202 | 1           | 16 KDM2B      |
| 1.91E-05   | 0.896162885 | 0.344 | 0.304 | 0.612866995 | 16 PHTF2      |
| 0.00020364 | 0.894213927 | 0.334 | 0.3   | 1           | 16 PRIM2      |
| 4.20E-10   | 0.891033205 | 0.487 | 0.423 | 1.35E-05    | 16 ASAP1      |
| 3.23E-09   | 0.888749363 | 0.414 | 0.34  | 0.000103641 | 16 CDK17      |
| 1.99E-13   | 0.886697844 | 0.368 | 0.227 | 6.40E-09    | 16 SLC4A7     |
| 7.93E-10   | 0.884356021 | 0.517 | 0.466 | 2.55E-05    | 16 ANKRD36B   |
| 4.18E-29   | 0.881649117 | 0.997 | 0.986 | 1.34E-24    | 16 FP671120.4 |
| 5.77E-10   | 0.878168749 | 0.517 | 0.502 | 1.85E-05    | 16 VPS13C     |
| 0.00032349 | 0.876635676 | 0.404 | 0.413 | 1           | 16 NBPF26     |
| 5.25E-11   | 0.870124031 | 0.576 | 0.566 | 1.69E-06    | 16 KAT6A      |



|            |             |       |       |             |               |
|------------|-------------|-------|-------|-------------|---------------|
| 1.85E-05   | 0.866027882 | 0.291 | 0.238 | 0.595620584 | 16 TXLNKY     |
| 2.13E-08   | 0.858150724 | 0.46  | 0.405 | 0.000683881 | 16 MYO5A      |
| 7.70E-07   | 0.857751362 | 0.315 | 0.232 | 0.024740499 | 16 UST        |
| 0.0086792  | 0.855807212 | 0.318 | 0.321 | 1           | 16 MGAT4A     |
| 0.00035477 | 0.854494542 | 0.361 | 0.353 | 1           | 16 SUSD6      |
| 5.87E-12   | 0.854013231 | 0.474 | 0.375 | 1.88E-07    | 16 TGFB2      |
| 1.33E-08   | 0.853865579 | 0.457 | 0.376 | 0.000427303 | 16 ARHGAP26   |
| 7.14E-07   | 0.84916444  | 0.477 | 0.484 | 0.022938271 | 16 ACAP2      |
| 0.00031412 | 0.84770777  | 0.348 | 0.326 | 1           | 16 AGTPBP1    |
| 2.71E-08   | 0.84652864  | 0.258 | 0.164 | 0.000869297 | 16 RFTN1      |
| 6.12E-06   | 0.84342631  | 0.348 | 0.301 | 0.196710614 | 16 LINC00623  |
| 1.00E-06   | 0.842972038 | 0.268 | 0.191 | 0.032174873 | 16 RNASEH2B   |
| 0.00012515 | 0.8301056   | 0.258 | 0.2   | 1           | 16 PFKFB3     |
| 5.26E-07   | 0.828115076 | 0.447 | 0.41  | 0.016878465 | 16 MTRF1      |
| 0.00039014 | 0.826201873 | 0.364 | 0.343 | 1           | 16 ATP8A1     |
| 0.00090461 | 0.825130776 | 0.391 | 0.397 | 1           | 16 PPP3CC     |
| 2.75E-05   | 0.824926042 | 0.487 | 0.505 | 0.881667923 | 16 OSBPL8     |
| 3.90E-09   | 0.824653221 | 0.543 | 0.535 | 0.00012539  | 16 SETX       |
| 5.00E-05   | 0.823955148 | 0.394 | 0.38  | 1           | 16 SYNRG      |
| 1.24E-08   | 0.820622606 | 0.338 | 0.25  | 0.000397029 | 16 TPTE2P6    |
| 1.50E-16   | 0.815507939 | 0.411 | 0.242 | 4.81E-12    | 16 ZEB1       |
| 4.95E-08   | 0.815225036 | 0.305 | 0.22  | 0.0015896   | 16 DDHD1      |
| 1.70E-07   | 0.813886026 | 0.46  | 0.405 | 0.005471814 | 16 MAP3K5     |
| 5.05E-05   | 0.810599555 | 0.295 | 0.247 | 1           | 16 CRLF3      |
| 0.00025378 | 0.810484971 | 0.407 | 0.404 | 1           | 16 STX7       |
| 1.09E-05   | 0.810232268 | 0.371 | 0.317 | 0.34901138  | 16 SH3BGR1    |
| 6.92E-05   | 0.805554241 | 0.5   | 0.566 | 1           | 16 UVRAG      |
| 7.20E-10   | 0.802636555 | 0.384 | 0.285 | 2.31E-05    | 16 PLEKHA2    |
| 7.40E-10   | 0.80092005  | 0.629 | 0.664 | 2.38E-05    | 16 ZCCHC7     |
| 0.00047183 | 0.798520053 | 0.348 | 0.315 | 1           | 16 GPRIN3     |
| 7.81E-05   | 0.792868416 | 0.301 | 0.255 | 1           | 16 IRF1-AS1   |
| 1.23E-06   | 0.789031895 | 0.262 | 0.185 | 0.039544315 | 16 BAZ1A      |
| 1.04E-18   | 0.78578837  | 0.781 | 0.823 | 3.35E-14    | 16 TBC1D5     |
| 0.00011388 | 0.781766397 | 0.493 | 0.553 | 1           | 16 SND1       |
| 0.00016001 | 0.779188249 | 0.281 | 0.231 | 1           | 16 ABCC1      |
| 0.00325825 | 0.776283515 | 0.391 | 0.396 | 1           | 16 DIAPH2     |
| 7.32E-12   | 0.775428439 | 0.533 | 0.438 | 2.35E-07    | 16 PLCL2      |
| 3.68E-07   | 0.768103485 | 0.308 | 0.224 | 0.011813236 | 16 TLE4       |
| 5.08E-09   | 0.766397411 | 0.546 | 0.517 | 0.000163111 | 16 ELF1       |
| 6.80E-07   | 0.753398694 | 0.513 | 0.546 | 0.021831798 | 16 NPIPB13    |
| 0.00012163 | 0.752932171 | 0.288 | 0.241 | 1           | 16 IRF2       |
| 0.00010008 | 0.750589964 | 0.474 | 0.518 | 1           | 16 STAG2      |
| 0.0074102  | 0.741695012 | 0.318 | 0.31  | 1           | 16 ATF7IP2    |
| 4.52E-09   | 0.739800556 | 0.609 | 0.656 | 0.000145092 | 16 HERC1      |
| 2.64E-07   | 0.73718377  | 0.497 | 0.479 | 0.008493465 | 16 RAP1B      |
| 3.42E-10   | 0.736796111 | 0.613 | 0.66  | 1.10E-05    | 16 KMT2E      |
| 0.00304777 | 0.735548779 | 0.464 | 0.517 | 1           | 16 OGT        |
| 1.90E-16   | 0.735100108 | 0.781 | 0.821 | 6.10E-12    | 16 FP236383.3 |
| 8.90E-05   | 0.732410657 | 0.414 | 0.406 | 1           | 16 NBPFL2     |
| 0.00019305 | 0.728489915 | 0.404 | 0.397 | 1           | 16 ACTR3      |
| 1.26E-06   | 0.723484336 | 0.301 | 0.221 | 0.040607929 | 16 ST3GAL1    |

|            |             |       |       |             |               |
|------------|-------------|-------|-------|-------------|---------------|
| 0.00263387 | 0.719023643 | 0.381 | 0.39  | 1           | 16 SMG1P4     |
| 1.01E-14   | 0.719004979 | 0.735 | 0.772 | 3.23E-10    | 16 NPIPB5     |
| 0.00012992 | 0.718021254 | 0.454 | 0.476 | 1           | 16 SPG11      |
| 0.00408217 | 0.714135535 | 0.477 | 0.541 | 1           | 16 ZHX2       |
| 0.00980115 | 0.713898503 | 0.447 | 0.517 | 1           | 16 COA1       |
| 0.00044521 | 0.712896685 | 0.46  | 0.497 | 1           | 16 GNB1       |
| 1.21E-05   | 0.70562742  | 0.553 | 0.601 | 0.389820197 | 16 SUCLG2     |
| 4.27E-06   | 0.70378223  | 0.672 | 0.749 | 0.137275242 | 16 ATXN1      |
| 0.00019545 | 0.703567878 | 0.291 | 0.248 | 1           | 16 MAP2K1     |
| 0.00118818 | 0.698002735 | 0.308 | 0.269 | 1           | 16 SRGAP2B    |
| 0.00051244 | 0.697075537 | 0.536 | 0.618 | 1           | 16 FARS2      |
| 4.81E-05   | 0.695268855 | 0.49  | 0.523 | 1           | 16 ROCK1      |
| 0.00389916 | 0.694145562 | 0.454 | 0.505 | 1           | 16 FBXO11     |
| 0.00448664 | 0.692216992 | 0.394 | 0.414 | 1           | 16 LINC01138  |
| 9.78E-05   | 0.690509295 | 0.497 | 0.533 | 1           | 16 USP3       |
| 0.00059509 | 0.687484168 | 0.255 | 0.207 | 1           | 16 ATP2B4     |
| 0.00089797 | 0.687291341 | 0.437 | 0.473 | 1           | 16 CAPZB      |
| 0.00024056 | 0.686572021 | 0.646 | 0.735 | 1           | 16 SMYD3      |
| 7.88E-05   | 0.683000772 | 0.288 | 0.221 | 1           | 16 SLCO3A1    |
| 2.64E-11   | 0.680100617 | 0.722 | 0.759 | 8.47E-07    | 16 VPS13B     |
| 4.12E-09   | 0.677121777 | 0.387 | 0.286 | 0.00013223  | 16 SRGAP2C    |
| 0.00082224 | 0.676932287 | 0.583 | 0.691 | 1           | 16 FAM172A    |
| 0.00046843 | 0.675387105 | 0.255 | 0.209 | 1           | 16 AC004922.1 |
| 0.00276069 | 0.671277669 | 0.424 | 0.46  | 1           | 16 FNBP4      |
| 0.00400183 | 0.665749162 | 0.325 | 0.305 | 1           | 16 ANKH       |
| 4.77E-05   | 0.664774671 | 0.517 | 0.581 | 1           | 16 EPS15      |
| 1.57E-06   | 0.658401573 | 0.576 | 0.647 | 0.050581048 | 16 PRRC2C     |
| 7.27E-05   | 0.656709418 | 0.354 | 0.319 | 1           | 16 AC001226.2 |
| 1.05E-05   | 0.656312743 | 0.454 | 0.418 | 0.338220256 | 16 PLCG2      |
| 0.0064069  | 0.655472193 | 0.288 | 0.252 | 1           | 16 ITPKB      |
| 0.0007606  | 0.653028453 | 0.351 | 0.331 | 1           | 16 NFATC3     |
| 0.00026456 | 0.651451452 | 0.586 | 0.677 | 1           | 16 AP005263.1 |
| 0.00308028 | 0.647513289 | 0.43  | 0.458 | 1           | 16 SENP7      |
| 0.00026677 | 0.647100854 | 0.434 | 0.429 | 1           | 16 MYH9       |
| 6.82E-15   | 0.646962052 | 0.735 | 0.771 | 2.19E-10    | 16 NPIPB4     |
| 0.00047952 | 0.634378291 | 0.427 | 0.443 | 1           | 16 FUS        |
| 0.00188813 | 0.63103448  | 0.513 | 0.594 | 1           | 16 RAPGEF6    |
| 0.00056375 | 0.625029353 | 0.315 | 0.275 | 1           | 16 MSN        |
| 1.45E-10   | 0.622164215 | 0.695 | 0.789 | 4.66E-06    | 16 NPIPB3     |
| 0.00016712 | 0.618150373 | 0.573 | 0.664 | 1           | 16 RNF213     |
| 0.00330907 | 0.616356453 | 0.497 | 0.578 | 1           | 16 RICTOR     |
| 8.24E-10   | 0.602455054 | 0.805 | 0.842 | 2.65E-05    | 16 RABGAP1L   |
| 0.00080415 | 0.602265262 | 0.272 | 0.438 | 1           | 16 OSBPL10    |
| 0.00263401 | 0.600795573 | 0.295 | 0.268 | 1           | 16 IKBKB      |
| 0.00158961 | 0.596679194 | 0.467 | 0.525 | 1           | 16 RSF1       |
| 0.00019741 | 0.595090219 | 0.351 | 0.573 | 1           | 16 SAT1       |
| 0.00664702 | 0.584798658 | 0.404 | 0.435 | 1           | 16 ABI1       |
| 1.50E-07   | 0.584435963 | 0.636 | 0.704 | 0.004822451 | 16 PAN3       |
| 6.17E-06   | 0.576840284 | 0.553 | 0.579 | 0.198161214 | 16 CCDC91     |
| 1.36E-13   | 0.574517754 | 0.911 | 0.935 | 4.37E-09    | 16 MT-RNR1    |
| 0.00134827 | 0.568002506 | 0.474 | 0.495 | 1           | 16 SMARCA2    |

|            |             |       |       |             |                 |
|------------|-------------|-------|-------|-------------|-----------------|
| 6.34E-19   | 0.564117499 | 0.315 | 0.69  | 2.04E-14    | 16 PLXDC2       |
| 0.00294949 | 0.553730275 | 0.517 | 0.609 | 1           | 16 FRYL         |
| 0.00084604 | 0.54952224  | 0.533 | 0.602 | 1           | 16 ZNF644       |
| 0.00505857 | 0.547439336 | 0.235 | 0.366 | 1           | 16 HSP90AA1     |
| 0.00999097 | 0.545922427 | 0.513 | 0.618 | 1           | 16 OGA          |
| 0.00894073 | 0.540863414 | 0.52  | 0.602 | 1           | 16 TUT4         |
| 0.00905931 | 0.53997062  | 0.497 | 0.534 | 1           | 16 HIVEP2       |
| 0.00261603 | 0.538938654 | 0.566 | 0.67  | 1           | 16 ERBIN        |
| 0.00261705 | 0.532579482 | 0.536 | 0.63  | 1           | 16 ARID4B       |
| 0.00062877 | 0.527592635 | 0.613 | 0.698 | 1           | 16 TRAPPC9      |
| 3.56E-05   | 0.526757327 | 0.268 | 0.195 | 1           | 16 TCF4         |
| 0.00636985 | 0.52577791  | 0.526 | 0.63  | 1           | 16 COP1         |
| 0.00513082 | 0.519261275 | 0.543 | 0.65  | 1           | 16 SMG1         |
| 0.00557519 | 0.517210283 | 0.513 | 0.596 | 1           | 16 BBX          |
| 3.23E-08   | 0.511038136 | 0.798 | 0.822 | 0.001036051 | 16 ARID1B       |
| 3.93E-05   | 0.510570231 | 0.632 | 0.717 | 1           | 16 CDKAL1       |
| 0.00115529 | 0.498560063 | 0.54  | 0.624 | 1           | 16 WAC          |
| 2.79E-06   | 0.497179365 | 0.434 | 0.363 | 0.089579615 | 16 STIM2        |
| 8.36E-06   | 0.474314706 | 0.639 | 0.729 | 0.26860566  | 16 NKTR         |
| 0.00048472 | 0.448847077 | 0.517 | 0.472 | 1           | 16 UTY          |
| 0.00405966 | 0.436746396 | 0.626 | 0.77  | 1           | 16 ASH1L        |
| 0.00030034 | 0.436323318 | 0.646 | 0.758 | 1           | 16 BIRC6        |
| 3.21E-15   | 0.428932987 | 0.993 | 0.986 | 1.03E-10    | 16 MT-RNR2      |
| 0.00016811 | 0.425128446 | 0.662 | 0.734 | 1           | 16 STAG1        |
| 0.00488134 | 0.421292771 | 0.576 | 0.696 | 1           | 16 BPTF         |
| 0.00587907 | 0.418070276 | 0.199 | 0.315 | 1           | 16 DOCK5        |
| 0.00523178 | 0.401718657 | 0.245 | 0.381 | 1           | 16 AC004593.2   |
| 0.00010648 | 0.401528579 | 0.659 | 0.784 | 1           | 16 KMT2C        |
| 0.0090228  | 0.39998969  | 0.321 | 0.489 | 1           | 16 TOP1         |
| 6.37E-13   | 0.387632925 | 0.202 | 0.462 | 2.05E-08    | 16 DOCK4        |
| 0.00352602 | 0.382148574 | 0.609 | 0.727 | 1           | 16 ATRX         |
| 0.00501223 | 0.367409061 | 0.626 | 0.718 | 1           | 16 NCOA2        |
| 0.00857254 | 0.366415765 | 0.278 | 0.409 | 1           | 16 FRMD4A       |
| 1.28E-08   | 0.337633925 | 0.669 | 0.641 | 0.000410876 | 16 SLCO5A1      |
| 0.00642117 | 0.313737402 | 0.179 | 0.285 | 1           | 16 HBP1         |
| 0.00386958 | 0.310422403 | 0.268 | 0.432 | 1           | 16 LMBRD1       |
| 0.00572587 | 0.306275654 | 0.192 | 0.309 | 1           | 16 DRG1         |
| 0.00421002 | 0.30484417  | 0.238 | 0.375 | 1           | 16 FAM168A      |
| 0.00400048 | 0.301950055 | 0.189 | 0.307 | 1           | 16 RFC1         |
| 0.00372958 | 0.300724425 | 0.159 | 0.268 | 1           | 16 HBS1L        |
| 1.96E-07   | 0.29939163  | 0.354 | 0.631 | 0.006280957 | 16 ANKRD28      |
| 0.00160646 | 0.29834987  | 0.265 | 0.433 | 1           | 16 SMURF2       |
| 0.00735972 | 0.294419733 | 0.202 | 0.324 | 1           | 16 HNRNPH3      |
| 0.00274339 | 0.291966742 | 0.185 | 0.307 | 1           | 16 TANGO6       |
| 0.00671889 | 0.290000703 | 0.156 | 0.256 | 1           | 16 COG3         |
| 0.00340475 | 0.289903191 | 0.268 | 0.433 | 1           | 16 TVP23C-CDRT4 |
| 0.0013593  | 0.288236633 | 0.222 | 0.374 | 1           | 16 UIMC1        |
| 0.00762497 | 0.277204804 | 0.281 | 0.433 | 1           | 16 DTNB         |
| 0.00546439 | 0.271677981 | 0.252 | 0.399 | 1           | 16 ZNF655       |
| 0.0098081  | 0.270871984 | 0.242 | 0.367 | 1           | 16 LINC01184    |
| 0.00408984 | 0.269733324 | 0.222 | 0.357 | 1           | 16 CUL4A        |

|            |             |       |       |           |               |
|------------|-------------|-------|-------|-----------|---------------|
| 0.00080629 | 0.267363688 | 0.209 | 0.357 | 1         | 16 CSDE1      |
| 0.00249109 | 0.26698608  | 0.272 | 0.445 | 1         | 16 EWSR1      |
| 0.00088708 | 0.266550924 | 0.185 | 0.313 | 1         | 16 RRAS2      |
| 0.00314417 | 0.263689753 | 0.252 | 0.408 | 1         | 16 NR2C2      |
| 0.00976903 | 0.262282846 | 0.219 | 0.344 | 1         | 16 NUDT3      |
| 0.00085434 | 0.25626057  | 0.179 | 0.305 | 1         | 16 SEC22A     |
| 0.00506764 | 0.255923176 | 0.212 | 0.341 | 1         | 16 PTGES3     |
| 0.00064465 | 0.255541332 | 0.268 | 0.448 | 1         | 16 CDC73      |
| 0.00242394 | 0.255339008 | 0.195 | 0.32  | 1         | 16 USP10      |
| 0.00798863 | 0.254930703 | 0.199 | 0.313 | 1         | 16 ELP2       |
| 0.00159304 | 0.254842772 | 0.212 | 0.349 | 1         | 16 PIK3CA     |
| 0.00393708 | 0.254686857 | 0.222 | 0.351 | 1         | 16 PSEN1      |
| 0.00136234 | 0.254524844 | 0.262 | 0.424 | 1         | 16 FOXK2      |
| 0.00634122 | 0.254479065 | 0.185 | 0.3   | 1         | 16 VPS36      |
| 0.00074605 | 0.253672638 | 0.222 | 0.374 | 1         | 16 CACUL1     |
| 0.00494374 | 0.250183196 | 0.175 | 0.285 | 1         | 16 MLLT6      |
| 0          | 4.273457485 | 0.916 | 0.134 | 0         | 17 CACNA1C    |
| 0          | 3.906500331 | 0.941 | 0.079 | 0         | 17 EBF1       |
| 0          | 3.888040836 | 0.722 | 0.023 | 0         | 17 NTRK3      |
| 3.41E-112  | 3.793131942 | 0.671 | 0.181 | 1.09E-107 | 17 ROBO1      |
| 1.06E-22   | 3.661029453 | 0.3   | 0.119 | 3.40E-18  | 17 CNTN5      |
| 0          | 3.641814228 | 0.907 | 0.121 | 0         | 17 SLIT3      |
| 0          | 3.461741536 | 0.751 | 0.04  | 0         | 17 ITGA8      |
| 0          | 3.355064233 | 0.713 | 0.055 | 0         | 17 COL25A1    |
| 9.78E-170  | 3.350723435 | 0.907 | 0.282 | 3.14E-165 | 17 PIP5K1B    |
| 3.16E-104  | 3.330637824 | 0.502 | 0.105 | 1.02E-99  | 17 HPSE2      |
| 2.94E-18   | 3.232887661 | 0.363 | 0.185 | 9.46E-14  | 17 ROBO2      |
| 2.34E-72   | 3.145229007 | 0.418 | 0.098 | 7.51E-68  | 17 GRID2      |
| 7.91E-171  | 3.074074613 | 0.903 | 0.275 | 2.54E-166 | 17 CALD1      |
| 4.19E-157  | 3.060087014 | 0.494 | 0.067 | 1.34E-152 | 17 SPARCL1    |
| 1.24E-167  | 3.012300101 | 0.92  | 0.271 | 4.00E-163 | 17 AC098650.1 |
| 0          | 2.952257483 | 0.73  | 0.01  | 0         | 17 CARMN      |
| 9.73E-255  | 2.93414135  | 0.532 | 0.049 | 3.13E-250 | 17 ANO3       |
| 5.53E-57   | 2.878511339 | 0.321 | 0.069 | 1.78E-52  | 17 KCNQ5      |
| 9.51E-209  | 2.844493162 | 0.835 | 0.163 | 3.05E-204 | 17 DLC1       |
| 1.16E-63   | 2.843246057 | 0.498 | 0.157 | 3.73E-59  | 17 KCNAB1     |
| 2.15E-125  | 2.837715185 | 0.966 | 0.546 | 6.91E-121 | 17 PDE3A      |
| 1.13E-135  | 2.83174988  | 0.987 | 0.623 | 3.64E-131 | 17 PRKG1      |
| 2.93E-141  | 2.794459706 | 0.781 | 0.213 | 9.42E-137 | 17 KALRN      |
| 3.18E-178  | 2.793915595 | 0.443 | 0.047 | 1.02E-173 | 17 PIEZO2     |
| 1.26E-26   | 2.746003602 | 0.637 | 0.431 | 4.05E-22  | 17 NRXN3      |
| 6.51E-187  | 2.723208396 | 0.81  | 0.159 | 2.09E-182 | 17 TMTC1      |
| 1.23E-248  | 2.714376164 | 0.797 | 0.123 | 3.96E-244 | 17 MEIS1      |
| 1.33E-237  | 2.709810209 | 0.722 | 0.102 | 4.27E-233 | 17 DGKG       |
| 1.90E-262  | 2.707380265 | 0.456 | 0.034 | 6.10E-258 | 17 MYH11      |
| 1.38E-140  | 2.695451163 | 0.582 | 0.102 | 4.44E-136 | 17 LHFPL6     |
| 4.28E-156  | 2.659444045 | 0.494 | 0.067 | 1.37E-151 | 17 SLC7A2     |
| 0          | 2.656759325 | 0.511 | 0.026 | 0         | 17 PRR16      |
| 2.49E-157  | 2.624465379 | 0.367 | 0.036 | 8.00E-153 | 17 PDZRN4     |
| 4.35E-71   | 2.522758286 | 0.827 | 0.489 | 1.40E-66  | 17 ZFHX3      |
| 2.95E-250  | 2.463971301 | 0.654 | 0.072 | 9.48E-246 | 17 ATP10A     |

|            |             |       |       |           |               |
|------------|-------------|-------|-------|-----------|---------------|
| 1.10E-46   | 2.400550559 | 0.595 | 0.29  | 3.53E-42  | 17 DMD        |
| 1.05E-118  | 2.380307682 | 0.755 | 0.216 | 3.37E-114 | 17 SLCO3A1    |
| 1.37E-175  | 2.367868173 | 0.696 | 0.119 | 4.40E-171 | 17 RBMS3      |
| 9.59E-125  | 2.282214867 | 0.646 | 0.148 | 3.08E-120 | 17 TMEM131L   |
| 0          | 2.268603958 | 0.654 | 0.025 | 0         | 17 PDGFRB     |
| 1.42E-119  | 2.249295074 | 0.759 | 0.219 | 4.55E-115 | 17 MEF2C      |
| 3.14E-44   | 2.237749246 | 0.392 | 0.123 | 1.01E-39  | 17 ADGRL3     |
| 0          | 2.146628516 | 0.62  | 0.036 | 0         | 17 CPED1      |
| 0          | 2.143496202 | 0.43  | 0.018 | 0         | 17 AC015574.1 |
| 3.39E-52   | 2.13814187  | 0.27  | 0.053 | 1.09E-47  | 17 MDGA2      |
| 5.71E-126  | 2.130114423 | 0.565 | 0.106 | 1.83E-121 | 17 A2M        |
| 3.01E-40   | 2.130021172 | 0.473 | 0.198 | 9.67E-36  | 17 AC114316.1 |
| 8.92E-102  | 2.121880353 | 0.304 | 0.037 | 2.86E-97  | 17 CRISPLD2   |
| 6.44E-200  | 2.093252829 | 0.658 | 0.094 | 2.07E-195 | 17 MSRB3      |
| 1.84E-142  | 2.062153875 | 0.527 | 0.084 | 5.91E-138 | 17 MYOM1      |
| 3.04E-231  | 2.030235584 | 0.81  | 0.119 | 9.75E-227 | 17 MEIS2      |
| 1.05E-110  | 2.028082312 | 0.73  | 0.199 | 3.38E-106 | 17 UNC5C      |
| 1.17E-89   | 1.991780718 | 0.667 | 0.204 | 3.74E-85  | 17 ROR1       |
| 2.20E-166  | 1.983705795 | 0.658 | 0.111 | 7.06E-162 | 17 RAPGEF5    |
| 3.45E-24   | 1.980802373 | 0.321 | 0.122 | 1.11E-19  | 17 MT2A       |
| 6.81E-93   | 1.970957642 | 0.532 | 0.122 | 2.19E-88  | 17 LTBP1      |
| 1.19E-95   | 1.957642585 | 0.422 | 0.075 | 3.83E-91  | 17 ADAMTS6    |
| 0          | 1.951823908 | 0.519 | 0.018 | 0         | 17 EDNRA      |
| 9.41E-156  | 1.946463129 | 0.376 | 0.037 | 3.02E-151 | 17 SYNPO2     |
| 4.13E-115  | 1.934449282 | 0.414 | 0.059 | 1.33E-110 | 17 ERG        |
| 2.49E-69   | 1.920548588 | 0.797 | 0.378 | 7.99E-65  | 17 FRY        |
| 7.92E-115  | 1.913509362 | 0.722 | 0.18  | 2.54E-110 | 17 FBXL7      |
| 4.91E-71   | 1.905265889 | 0.903 | 0.631 | 1.58E-66  | 17 TBC1D1     |
| 2.59E-114  | 1.902359156 | 0.793 | 0.239 | 8.32E-110 | 17 ZEB1       |
| 3.06E-19   | 1.895724287 | 0.595 | 0.428 | 9.82E-15  | 17 GPC6       |
| 5.01E-39   | 1.889435963 | 0.679 | 0.381 | 1.61E-34  | 17 PCDH9      |
| 1.96E-114  | 1.889235352 | 0.498 | 0.09  | 6.29E-110 | 17 EDIL3      |
| 8.99E-156  | 1.886493335 | 0.414 | 0.046 | 2.89E-151 | 17 COL12A1    |
| 1.82E-173  | 1.886307869 | 0.363 | 0.032 | 5.85E-169 | 17 DAPK2      |
| 9.03E-181  | 1.883257357 | 0.511 | 0.062 | 2.90E-176 | 17 DAAM2      |
| 1.49E-162  | 1.853793193 | 0.502 | 0.066 | 4.77E-158 | 17 MICAL2     |
| 0          | 1.849526031 | 0.426 | 0.024 | 0         | 17 COL21A1    |
| 9.13E-82   | 1.843292857 | 0.865 | 0.377 | 2.93E-77  | 17 SOX5       |
| 9.68E-138  | 1.834729812 | 0.338 | 0.034 | 3.11E-133 | 17 SAMD3      |
| 4.59E-65   | 1.824570716 | 0.354 | 0.073 | 1.47E-60  | 17 ADGRB3     |
| 1.19E-49   | 1.803828176 | 0.338 | 0.082 | 3.81E-45  | 17 KCNMA1     |
| 7.92E-34   | 1.801643307 | 0.359 | 0.124 | 2.54E-29  | 17 DGKB       |
| 4.10E-162  | 1.799410571 | 0.304 | 0.023 | 1.32E-157 | 17 ELN        |
| 2.48E-53   | 1.787988143 | 0.781 | 0.435 | 7.96E-49  | 17 EPS8       |
| 0.00012555 | 1.786374876 | 0.405 | 0.338 | 1         | 17 CSMD1      |
| 3.76E-64   | 1.785658711 | 0.595 | 0.2   | 1.21E-59  | 17 FIGN       |
| 2.65E-38   | 1.782034578 | 0.586 | 0.275 | 8.50E-34  | 17 RCAN2      |
| 3.00E-70   | 1.770164156 | 0.916 | 0.603 | 9.64E-66  | 17 UTRN       |
| 9.63E-64   | 1.766989694 | 0.629 | 0.236 | 3.09E-59  | 17 ATP11C     |
| 5.75E-283  | 1.753260474 | 0.477 | 0.033 | 1.85E-278 | 17 NIBAN1     |
| 1.05E-53   | 1.752420577 | 0.667 | 0.322 | 3.37E-49  | 17 ARHGAP17   |

|           |             |       |       |             |               |
|-----------|-------------|-------|-------|-------------|---------------|
| 1.21E-66  | 1.747181361 | 0.532 | 0.155 | 3.90E-62    | 17 HDAC9      |
| 1.39E-32  | 1.745939671 | 0.329 | 0.108 | 4.45E-28    | 17 GRIK2      |
| 4.23E-136 | 1.738676382 | 0.435 | 0.057 | 1.36E-131   | 17 ZFPM2-AS1  |
| 2.05E-27  | 1.737879166 | 0.629 | 0.397 | 6.57E-23    | 17 GNAS       |
| 1.05E-127 | 1.727250012 | 0.494 | 0.077 | 3.37E-123   | 17 ENG        |
| 1.68E-176 | 1.719801947 | 0.502 | 0.061 | 5.38E-172   | 17 FILIP1     |
| 5.81E-74  | 1.71688261  | 0.916 | 0.602 | 1.87E-69    | 17 AC012409.2 |
| 7.33E-84  | 1.713426047 | 0.713 | 0.238 | 2.35E-79    | 17 ARHGAP42   |
| 4.03E-47  | 1.707763923 | 0.489 | 0.167 | 1.29E-42    | 17 RGS6       |
| 0         | 1.68717658  | 0.523 | 0.034 | 0           | 17 IRAG1      |
| 0         | 1.676144333 | 0.291 | 0.01  | 0           | 17 MYOCD      |
| 7.62E-94  | 1.671172978 | 0.574 | 0.139 | 2.45E-89    | 17 EPB41L2    |
| 1.39E-24  | 1.667133204 | 0.46  | 0.236 | 4.45E-20    | 17 SORBS1     |
| 5.23E-35  | 1.66462893  | 0.738 | 0.536 | 1.68E-30    | 17 ARHGEF7    |
| 4.11E-34  | 1.66115288  | 0.384 | 0.136 | 1.32E-29    | 17 IL1RAPL1   |
| 1.01E-47  | 1.651279906 | 0.679 | 0.344 | 3.23E-43    | 17 ITGA1      |
| 1.37E-33  | 1.650156101 | 0.498 | 0.221 | 4.41E-29    | 17 NR4A1      |
| 0         | 1.646976576 | 0.422 | 0.019 | 0           | 17 ADCY3      |
| 0         | 1.632022373 | 0.278 | 0.006 | 0           | 17 ADRA1A     |
| 4.17E-43  | 1.631426148 | 0.489 | 0.189 | 1.34E-38    | 17 ENAH       |
| 1.99E-46  | 1.630400501 | 0.722 | 0.396 | 6.38E-42    | 17 PITPNC1    |
| 7.74E-117 | 1.626620914 | 0.557 | 0.104 | 2.49E-112   | 17 SH3RF3     |
| 2.26E-55  | 1.624967354 | 0.759 | 0.392 | 7.24E-51    | 17 INPP4B     |
| 0         | 1.62105132  | 0.456 | 0.014 | 0           | 17 WFDC1      |
| 3.68E-55  | 1.61627981  | 0.586 | 0.228 | 1.18E-50    | 17 ZBTB46     |
| 2.15E-52  | 1.5939198   | 0.823 | 0.53  | 6.91E-48    | 17 MAML3      |
| 8.49E-71  | 1.589270627 | 0.937 | 0.55  | 2.73E-66    | 17 ZBTB16     |
| 8.03E-40  | 1.588372229 | 0.574 | 0.254 | 2.58E-35    | 17 DOCK8      |
| 1.61E-129 | 1.583280096 | 0.274 | 0.024 | 5.18E-125   | 17 HS3ST3A1   |
| 2.12E-54  | 1.579374753 | 0.954 | 0.787 | 6.80E-50    | 17 PLCL1      |
| 3.59E-34  | 1.564160314 | 0.274 | 0.076 | 1.15E-29    | 17 SLC35F1    |
| 7.56E-14  | 1.563509806 | 0.359 | 0.2   | 2.43E-09    | 17 CTNNA3     |
| 3.73E-55  | 1.56267766  | 0.308 | 0.064 | 1.20E-50    | 17 COL23A1    |
| 0         | 1.556186591 | 0.308 | 0.01  | 0           | 17 LDB3       |
| 7.93E-76  | 1.553913757 | 0.498 | 0.126 | 2.55E-71    | 17 RNF144A    |
| 9.51E-285 | 1.551982666 | 0.502 | 0.037 | 3.05E-280   | 17 LYVE1      |
| 3.22E-49  | 1.526158081 | 0.266 | 0.052 | 1.03E-44    | 17 ADAMTS1    |
| 4.59E-92  | 1.524722726 | 0.473 | 0.093 | 1.47E-87    | 17 MAP2       |
| 9.41E-55  | 1.521152301 | 0.511 | 0.163 | 3.02E-50    | 17 ZEB2       |
| 1.12E-45  | 1.517004582 | 0.831 | 0.633 | 3.60E-41    | 17 CLMN       |
| 0         | 1.516628353 | 0.371 | 0.007 | 0           | 17 CCN4       |
| 1.55E-25  | 1.502185727 | 0.523 | 0.302 | 4.98E-21    | 17 PHTF2      |
| 4.87E-66  | 1.487376776 | 0.494 | 0.136 | 1.56E-61    | 17 FLNA       |
| 8.92E-52  | 1.484621038 | 0.802 | 0.479 | 2.87E-47    | 17 MYO1D      |
| 1.83E-99  | 1.481729004 | 0.481 | 0.09  | 5.88E-95    | 17 GRK5       |
| 0         | 1.477391651 | 0.274 | 0.003 | 0           | 17 AGTR1      |
| 2.07E-08  | 1.469383653 | 0.371 | 0.266 | 0.000664862 | 17 LAMA2      |
| 2.28E-56  | 1.459302824 | 0.776 | 0.403 | 7.31E-52    | 17 FRMD4A     |
| 7.80E-35  | 1.45817998  | 0.35  | 0.113 | 2.51E-30    | 17 AFF3       |
| 4.29E-169 | 1.451331971 | 0.473 | 0.053 | 1.38E-164   | 17 RUNX1T1    |
| 6.42E-68  | 1.439304287 | 0.591 | 0.191 | 2.06E-63    | 17 ARHGEF17   |

|           |             |       |       |             |                |
|-----------|-------------|-------|-------|-------------|----------------|
| 7.68E-41  | 1.437232279 | 0.793 | 0.589 | 2.47E-36    | 17 PPP1R12A    |
| 5.68E-46  | 1.43554167  | 0.502 | 0.188 | 1.82E-41    | 17 SPECC1      |
| 4.47E-29  | 1.427366338 | 0.527 | 0.282 | 1.44E-24    | 17 SORT1       |
| 1.42E-127 | 1.427011106 | 0.519 | 0.083 | 4.55E-123   | 17 RAPGEF4     |
| 3.01E-27  | 1.420844379 | 0.308 | 0.106 | 9.68E-23    | 17 CNTN1       |
| 1.48E-82  | 1.41837428  | 0.43  | 0.088 | 4.76E-78    | 17 ANTXR1      |
| 1.95E-16  | 1.41732225  | 0.287 | 0.122 | 6.28E-12    | 17 HS6ST3      |
| 1.32E-65  | 1.415067477 | 0.966 | 0.83  | 4.23E-61    | 17 PTPRG       |
| 1.14E-36  | 1.413965562 | 0.519 | 0.239 | 3.65E-32    | 17 SLC38A2     |
| 7.44E-21  | 1.41327687  | 0.451 | 0.238 | 2.39E-16    | 17 C1QTNF7-AS1 |
| 3.71E-25  | 1.413106081 | 0.624 | 0.401 | 1.19E-20    | 17 ELL2        |
| 9.62E-41  | 1.409720576 | 0.705 | 0.369 | 3.09E-36    | 17 CACNB2      |
| 1.29E-53  | 1.408433228 | 0.544 | 0.19  | 4.14E-49    | 17 NR2F1-AS1   |
| 7.13E-83  | 1.40569575  | 0.376 | 0.067 | 2.29E-78    | 17 NOTCH3      |
| 3.07E-98  | 1.404443309 | 0.481 | 0.094 | 9.86E-94    | 17 MAP3K20     |
| 1.38E-48  | 1.403473019 | 0.608 | 0.246 | 4.42E-44    | 17 SYN3        |
| 1.18E-48  | 1.403323478 | 0.414 | 0.123 | 3.79E-44    | 17 FOXN2       |
| 0         | 1.401873724 | 0.409 | 0.011 | 0           | 17 ITGA11      |
| 1.31E-96  | 1.400326616 | 0.426 | 0.072 | 4.20E-92    | 17 NFASC       |
| 2.54E-194 | 1.393695567 | 0.266 | 0.015 | 8.16E-190   | 17 KCNE4       |
| 8.79E-52  | 1.393232718 | 0.38  | 0.095 | 2.82E-47    | 17 KCNT2       |
| 1.49E-23  | 1.387487429 | 0.283 | 0.099 | 4.78E-19    | 17 AC109466.1  |
| 3.55E-14  | 1.386570018 | 0.278 | 0.13  | 1.14E-09    | 17 DCC         |
| 3.37E-56  | 1.381687633 | 0.734 | 0.319 | 1.08E-51    | 17 NRP1        |
| 3.57E-48  | 1.38076544  | 0.7   | 0.325 | 1.15E-43    | 17 LDLRAD4     |
| 3.56E-52  | 1.380546425 | 0.477 | 0.15  | 1.14E-47    | 17 PARM1       |
| 2.15E-45  | 1.37215461  | 0.785 | 0.469 | 6.90E-41    | 17 SSBP2       |
| 1.30E-53  | 1.36822062  | 0.523 | 0.182 | 4.17E-49    | 17 SOX13       |
| 2.51E-46  | 1.363350703 | 0.827 | 0.674 | 8.05E-42    | 17 NBEAL1      |
| 8.83E-37  | 1.363167745 | 0.819 | 0.514 | 2.84E-32    | 17 TACC1       |
| 4.75E-105 | 1.354595402 | 0.418 | 0.066 | 1.52E-100   | 17 NUAK1       |
| 1.63E-191 | 1.347649416 | 0.3   | 0.019 | 5.23E-187   | 17 MCF2        |
| 1.37E-59  | 1.344197545 | 0.65  | 0.255 | 4.41E-55    | 17 EPAS1       |
| 8.70E-35  | 1.33922632  | 0.806 | 0.659 | 2.79E-30    | 17 HIPK2       |
| 4.35E-61  | 1.337529383 | 0.494 | 0.135 | 1.40E-56    | 17 AKAP12      |
| 1.69E-32  | 1.335193131 | 0.667 | 0.403 | 5.43E-28    | 17 MAP3K5      |
| 3.62E-42  | 1.329453719 | 0.772 | 0.474 | 1.16E-37    | 17 FCHSD2      |
| 0         | 1.314977248 | 0.295 | 0.008 | 0           | 17 MCAM        |
| 6.01E-15  | 1.312862402 | 0.527 | 0.365 | 1.93E-10    | 17 PPARG       |
| 5.71E-08  | 1.307675532 | 0.287 | 0.169 | 0.001833524 | 17 FAM155A     |
| 2.15E-43  | 1.296238776 | 0.713 | 0.366 | 6.90E-39    | 17 DGKH        |
| 0         | 1.293181008 | 0.295 | 0.002 | 0           | 17 HEYL        |
| 8.67E-55  | 1.284306108 | 0.464 | 0.136 | 2.78E-50    | 17 NCALD       |
| 2.64E-22  | 1.273510415 | 0.785 | 0.675 | 8.49E-18    | 17 SYNE1       |
| 4.72E-50  | 1.27033667  | 0.54  | 0.184 | 1.52E-45    | 17 ZFPM2       |
| 2.22E-15  | 1.268592703 | 0.654 | 0.534 | 7.13E-11    | 17 PPP1R12B    |
| 1.26E-11  | 1.264025199 | 0.354 | 0.21  | 4.04E-07    | 17 RGS5        |
| 5.25E-41  | 1.258466696 | 0.544 | 0.248 | 1.68E-36    | 17 UBA2        |
| 5.98E-39  | 1.247276813 | 0.561 | 0.231 | 1.92E-34    | 17 CLIC4       |
| 3.81E-19  | 1.243595345 | 0.629 | 0.433 | 1.22E-14    | 17 CPM         |
| 9.27E-33  | 1.241298203 | 0.747 | 0.548 | 2.98E-28    | 17 ROCK2       |

|           |             |       |       |             |               |
|-----------|-------------|-------|-------|-------------|---------------|
| 4.63E-44  | 1.240696618 | 0.932 | 0.794 | 1.49E-39    | 17 RBPMS      |
| 2.46E-15  | 1.240527154 | 0.747 | 0.612 | 7.89E-11    | 17 TRPM3      |
| 2.27E-55  | 1.239139798 | 0.376 | 0.092 | 7.28E-51    | 17 TTLL7      |
| 3.76E-88  | 1.237771968 | 0.278 | 0.035 | 1.21E-83    | 17 ACER2      |
| 5.21E-28  | 1.229185035 | 0.346 | 0.128 | 1.67E-23    | 17 FN1        |
| 3.73E-28  | 1.22660375  | 0.456 | 0.212 | 1.20E-23    | 17 ABHD2      |
| 4.06E-43  | 1.224344676 | 0.65  | 0.327 | 1.30E-38    | 17 NR2F2-AS1  |
| 1.67E-42  | 1.213034687 | 0.447 | 0.15  | 5.37E-38    | 17 ETS1       |
| 4.26E-31  | 1.211367732 | 0.274 | 0.078 | 1.37E-26    | 17 NR4A3      |
| 7.98E-24  | 1.208802038 | 0.667 | 0.451 | 2.56E-19    | 17 PALLD      |
| 1.23E-09  | 1.206858875 | 0.384 | 0.262 | 3.95E-05    | 17 AC022414.1 |
| 1.90E-19  | 1.200542207 | 0.388 | 0.179 | 6.11E-15    | 17 FOS        |
| 2.47E-25  | 1.193046291 | 0.755 | 0.652 | 7.92E-21    | 17 PTPRK      |
| 1.22E-23  | 1.192597367 | 0.266 | 0.088 | 3.93E-19    | 17 CDH13      |
| 8.97E-24  | 1.189434317 | 0.696 | 0.509 | 2.88E-19    | 17 PPP1CB     |
| 1.19E-291 | 1.189139601 | 0.316 | 0.013 | 3.83E-287   | 17 AC008397.2 |
| 5.75E-38  | 1.186093823 | 0.696 | 0.393 | 1.85E-33    | 17 DIAPH2     |
| 2.43E-103 | 1.185407342 | 0.477 | 0.089 | 7.80E-99    | 17 TINAGL1    |
| 1.66E-35  | 1.180609364 | 0.532 | 0.242 | 5.33E-31    | 17 CEP85L     |
| 2.66E-25  | 1.171114322 | 0.515 | 0.263 | 8.54E-21    | 17 RARB       |
| 3.41E-16  | 1.171056491 | 0.675 | 0.513 | 1.09E-11    | 17 SDK1       |
| 2.36E-65  | 1.162397255 | 0.405 | 0.093 | 7.58E-61    | 17 ISYNA1     |
| 1.54E-22  | 1.156997591 | 0.502 | 0.262 | 4.93E-18    | 17 ARHGAP10   |
| 4.85E-43  | 1.155426604 | 0.283 | 0.066 | 1.56E-38    | 17 LBH        |
| 3.26E-201 | 1.153174866 | 0.291 | 0.017 | 1.05E-196   | 17 LMOD1      |
| 1.90E-41  | 1.152322717 | 0.422 | 0.134 | 6.10E-37    | 17 SPRY4-AS1  |
| 1.51E-11  | 1.151677662 | 0.498 | 0.377 | 4.85E-07    | 17 AKAP6      |
| 8.26E-22  | 1.148185749 | 0.409 | 0.197 | 2.65E-17    | 17 LINC00882  |
| 3.80E-18  | 1.1477965   | 0.257 | 0.099 | 1.22E-13    | 17 OPCML      |
| 1.18E-08  | 1.146555619 | 0.401 | 0.279 | 0.000379838 | 17 NUDT4      |
| 1.28E-37  | 1.14621363  | 0.751 | 0.52  | 4.10E-33    | 17 ROCK1      |
| 6.92E-50  | 1.14236296  | 0.422 | 0.122 | 2.22E-45    | 17 ACTN1      |
| 3.86E-34  | 1.139640203 | 0.81  | 0.697 | 1.24E-29    | 17 CDC42BPA   |
| 9.77E-59  | 1.138821315 | 0.966 | 0.875 | 3.14E-54    | 17 LPP        |
| 4.20E-36  | 1.136586477 | 0.641 | 0.335 | 1.35E-31    | 17 LIMA1      |
| 1.33E-36  | 1.133638326 | 0.409 | 0.139 | 4.28E-32    | 17 CAMK1D     |
| 4.16E-115 | 1.132316153 | 0.266 | 0.025 | 1.34E-110   | 17 PTP4A3     |
| 0         | 1.129888076 | 0.308 | 0.003 | 0           | 17 CSPG4      |
| 3.49E-47  | 1.127559459 | 0.574 | 0.212 | 1.12E-42    | 17 TCF7L1     |
| 2.87E-257 | 1.124125899 | 0.3   | 0.014 | 9.21E-253   | 17 NRGN       |
| 4.79E-31  | 1.118955672 | 0.662 | 0.379 | 1.54E-26    | 17 CACNA2D1   |
| 3.41E-117 | 1.116156998 | 0.295 | 0.03  | 1.09E-112   | 17 ATP2A3     |
| 1.26E-17  | 1.112427615 | 0.705 | 0.574 | 4.04E-13    | 17 CRIM1      |
| 6.81E-15  | 1.111759425 | 0.426 | 0.254 | 2.19E-10    | 17 PGM5       |
| 1.44E-23  | 1.107438532 | 0.692 | 0.526 | 4.63E-19    | 17 PTEN       |
| 2.33E-26  | 1.101001647 | 0.498 | 0.255 | 7.49E-22    | 17 ELOVL5     |
| 1.65E-05  | 1.099191566 | 0.439 | 0.384 | 0.530330879 | 17 JAK2       |
| 1.29E-26  | 1.098179603 | 0.641 | 0.404 | 4.14E-22    | 17 CAMK2D     |
| 3.99E-18  | 1.09610783  | 0.696 | 0.596 | 1.28E-13    | 17 NBEA       |
| 6.51E-127 | 1.091089007 | 0.274 | 0.024 | 2.09E-122   | 17 WNK2       |
| 2.89E-40  | 1.090184807 | 0.43  | 0.137 | 9.27E-36    | 17 NTRK2      |



|            |             |       |       |             |               |
|------------|-------------|-------|-------|-------------|---------------|
| 4.42E-170  | 1.082429411 | 0.354 | 0.031 | 1.42E-165   | 17 ITGA7      |
| 1.28E-05   | 1.082167846 | 0.333 | 0.26  | 0.412088217 | 17 CNTN3      |
| 3.74E-41   | 1.08148664  | 0.464 | 0.159 | 1.20E-36    | 17 KIRREL1    |
| 1.64E-29   | 1.068844865 | 0.38  | 0.141 | 5.26E-25    | 17 LINC01619  |
| 2.49E-24   | 1.066492932 | 0.388 | 0.167 | 7.99E-20    | 17 JAG1       |
| 4.02E-196  | 1.065756414 | 0.291 | 0.017 | 1.29E-191   | 17 TRPC4      |
| 3.59E-34   | 1.061916972 | 0.561 | 0.26  | 1.15E-29    | 17 TPM1       |
| 9.06E-99   | 1.061663959 | 0.253 | 0.026 | 2.91E-94    | 17 STAT4      |
| 3.65E-30   | 1.059570113 | 0.747 | 0.51  | 1.17E-25    | 17 AUTS2      |
| 7.62E-26   | 1.059381932 | 0.781 | 0.485 | 2.45E-21    | 17 FKBP5      |
| 5.26E-17   | 1.052672979 | 0.371 | 0.191 | 1.69E-12    | 17 MEF2C-AS1  |
| 1.39E-21   | 1.050377995 | 0.38  | 0.168 | 4.46E-17    | 17 TPM4       |
| 5.32E-05   | 1.047330353 | 0.574 | 0.593 | 1           | 17 PDE7B      |
| 5.06E-97   | 1.044028816 | 0.401 | 0.065 | 1.62E-92    | 17 STARD9     |
| 1.19E-23   | 1.040662965 | 0.561 | 0.305 | 3.83E-19    | 17 NR3C1      |
| 3.61E-18   | 1.040583935 | 0.578 | 0.405 | 1.16E-13    | 17 SSBP3      |
| 0          | 1.039327195 | 0.283 | 0.007 | 0           | 17 MFGE8      |
| 1.18E-125  | 1.038140602 | 0.35  | 0.039 | 3.78E-121   | 17 EHBP1L1    |
| 5.88E-40   | 1.033006411 | 0.447 | 0.156 | 1.89E-35    | 17 TBX2       |
| 1.13E-10   | 1.029980639 | 0.295 | 0.156 | 3.63E-06    | 17 EGR1       |
| 1.07E-16   | 1.029621689 | 0.451 | 0.27  | 3.43E-12    | 17 RAPH1      |
| 1.05E-30   | 1.029398895 | 0.616 | 0.341 | 3.39E-26    | 17 MAP4K4     |
| 3.37E-17   | 1.028471883 | 0.578 | 0.375 | 1.08E-12    | 17 ARHGAP26   |
| 1.13E-84   | 1.028379748 | 0.291 | 0.04  | 3.63E-80    | 17 TPM2       |
| 1.42E-17   | 1.019683659 | 0.363 | 0.178 | 4.56E-13    | 17 ADARB1     |
| 1.42E-51   | 1.018098221 | 0.274 | 0.053 | 4.56E-47    | 17 AL133346.1 |
| 3.27E-19   | 1.017634961 | 0.612 | 0.451 | 1.05E-14    | 17 CD46       |
| 6.25E-24   | 1.017089132 | 0.641 | 0.44  | 2.01E-19    | 17 KIF13A     |
| 3.42E-26   | 1.015766049 | 0.835 | 0.743 | 1.10E-21    | 17 MBNL1      |
| 2.14E-16   | 1.015104833 | 0.287 | 0.122 | 6.87E-12    | 17 SLC22A3    |
| 1.93E-24   | 1.01505942  | 0.447 | 0.211 | 6.21E-20    | 17 TLE1       |
| 4.05E-33   | 1.011900145 | 0.346 | 0.115 | 1.30E-28    | 17 NIPAL2     |
| 8.48E-15   | 1.002965718 | 0.498 | 0.322 | 2.72E-10    | 17 AC104123.1 |
| 2.05E-100  | 1.002349742 | 0.312 | 0.039 | 6.60E-96    | 17 IRAG1-AS1  |
| 3.82E-25   | 1.001565877 | 0.397 | 0.163 | 1.23E-20    | 17 PLCE1      |
| 4.75E-20   | 0.998757905 | 0.696 | 0.521 | 1.53E-15    | 17 RASAL2     |
| 8.55E-30   | 0.994866452 | 0.827 | 0.644 | 2.74E-25    | 17 RAPGEF2    |
| 4.51E-22   | 0.990396917 | 0.751 | 0.606 | 1.45E-17    | 17 TBL1X      |
| 7.05E-46   | 0.987085033 | 0.316 | 0.076 | 2.26E-41    | 17 LDLRAD3    |
| 2.13E-64   | 0.984689452 | 0.27  | 0.043 | 6.85E-60    | 17 CDH11      |
| 2.58E-20   | 0.979244922 | 0.338 | 0.147 | 8.29E-16    | 17 ADCY5      |
| 1.01E-47   | 0.977978055 | 0.342 | 0.084 | 3.24E-43    | 17 IGFBP4     |
| 1.03E-219  | 0.96950097  | 0.291 | 0.015 | 3.30E-215   | 17 ADIRF      |
| 3.28E-41   | 0.96466846  | 0.321 | 0.086 | 1.05E-36    | 17 WTIP       |
| 2.14E-19   | 0.964231595 | 0.536 | 0.289 | 6.89E-15    | 17 SGIP1      |
| 0.00352684 | 0.959724714 | 0.7   | 0.712 | 1           | 17 PRKCA      |
| 1.14E-26   | 0.955779833 | 0.325 | 0.115 | 3.65E-22    | 17 TRPC6      |
| 1.01E-87   | 0.947977156 | 0.262 | 0.031 | 3.26E-83    | 17 AXL        |
| 1.63E-47   | 0.93612543  | 0.287 | 0.06  | 5.24E-43    | 17 DYNC111    |
| 7.53E-30   | 0.934388274 | 0.414 | 0.154 | 2.42E-25    | 17 DOCK10     |
| 1.16E-29   | 0.927593043 | 0.464 | 0.194 | 3.72E-25    | 17 TCF4       |

|            |             |       |       |             |               |
|------------|-------------|-------|-------|-------------|---------------|
| 1.19E-21   | 0.926007867 | 0.523 | 0.299 | 3.82E-17    | 17 PTPN9      |
| 2.37E-17   | 0.918248835 | 0.755 | 0.604 | 7.62E-13    | 17 IGFBP7     |
| 8.86E-71   | 0.915044212 | 0.321 | 0.055 | 2.84E-66    | 17 ZNF423     |
| 2.49E-14   | 0.914352564 | 0.329 | 0.167 | 8.00E-10    | 17 STAC       |
| 1.17E-34   | 0.912210038 | 0.367 | 0.119 | 3.77E-30    | 17 TIMP3      |
| 5.47E-68   | 0.910636715 | 0.27  | 0.042 | 1.76E-63    | 17 AC100830.1 |
| 6.12E-16   | 0.909869117 | 0.388 | 0.205 | 1.97E-11    | 17 ATP2B4     |
| 7.49E-14   | 0.906975992 | 0.384 | 0.219 | 2.40E-09    | 17 PLD1       |
| 1.36E-27   | 0.902607201 | 0.312 | 0.106 | 4.36E-23    | 17 COL5A2     |
| 5.81E-21   | 0.896427602 | 0.73  | 0.5   | 1.87E-16    | 17 HIP1       |
| 1.92E-14   | 0.893858202 | 0.62  | 0.473 | 6.17E-10    | 17 PDS5B      |
| 1.77E-20   | 0.893047869 | 0.464 | 0.24  | 5.70E-16    | 17 EVA1C      |
| 3.63E-17   | 0.8827503   | 0.405 | 0.21  | 1.17E-12    | 17 OSMR       |
| 2.30E-15   | 0.879704456 | 0.494 | 0.327 | 7.40E-11    | 17 PTPN12     |
| 0.00022258 | 0.873865836 | 0.473 | 0.408 | 1           | 17 PDZRN3     |
| 5.57E-09   | 0.873777236 | 0.519 | 0.4   | 0.000178734 | 17 CMSS1      |
| 6.75E-05   | 0.869431702 | 0.414 | 0.327 | 1           | 17 COL4A1     |
| 4.41E-32   | 0.868447106 | 0.878 | 0.7   | 1.42E-27    | 17 APBB2      |
| 3.81E-11   | 0.865973032 | 0.367 | 0.228 | 1.22E-06    | 17 CAP2       |
| 6.49E-22   | 0.861031248 | 0.65  | 0.377 | 2.09E-17    | 17 PTPRD      |
| 7.23E-05   | 0.859102659 | 0.616 | 0.663 | 1           | 17 SAMD12     |
| 2.65E-307  | 0.859072914 | 0.283 | 0.01  | 8.52E-303   | 17 ANO1       |
| 9.66E-63   | 0.847502202 | 0.257 | 0.04  | 3.10E-58    | 17 SNAP25-AS1 |
| 3.17E-14   | 0.847286213 | 0.616 | 0.456 | 1.02E-09    | 17 DOCK4      |
| 2.82E-183  | 0.846501242 | 0.283 | 0.017 | 9.05E-179   | 17 PLEKHG2    |
| 6.18E-08   | 0.843475278 | 0.274 | 0.162 | 0.001984187 | 17 MCTP1      |
| 1.74E-19   | 0.841888087 | 0.325 | 0.139 | 5.58E-15    | 17 GUCY1A1    |
| 0.00160022 | 0.839559477 | 0.443 | 0.414 | 1           | 17 NEO1       |
| 9.20E-19   | 0.836831608 | 0.354 | 0.163 | 2.95E-14    | 17 RFTN1      |
| 7.63E-12   | 0.836100054 | 0.523 | 0.372 | 2.45E-07    | 17 DLEU2      |
| 3.08E-07   | 0.836025509 | 0.414 | 0.315 | 0.009884014 | 17 POLR2B     |
| 8.75E-16   | 0.832318675 | 0.532 | 0.363 | 2.81E-11    | 17 NOTCH2     |
| 5.93E-15   | 0.830189877 | 0.654 | 0.527 | 1.90E-10    | 17 BMPR2      |
| 4.17E-39   | 0.825135625 | 0.308 | 0.082 | 1.34E-34    | 17 AGAP11     |
| 3.29E-13   | 0.822281144 | 0.392 | 0.223 | 1.06E-08    | 17 TLE4       |
| 2.68E-59   | 0.82198146  | 0.266 | 0.045 | 8.60E-55    | 17 FHL2       |
| 1.45E-88   | 0.821286596 | 0.253 | 0.028 | 4.67E-84    | 17 PLXND1     |
| 2.91E-13   | 0.820843212 | 0.35  | 0.185 | 9.35E-09    | 17 AP002518.2 |
| 9.79E-26   | 0.819047564 | 0.43  | 0.19  | 3.14E-21    | 17 DENND3     |
| 2.29E-12   | 0.812633758 | 0.468 | 0.328 | 7.35E-08    | 17 HSD17B4    |
| 5.46E-62   | 0.809819484 | 0.316 | 0.061 | 1.75E-57    | 17 RBPMS2     |
| 1.05E-12   | 0.807118089 | 0.287 | 0.139 | 3.36E-08    | 17 NXN        |
| 7.57E-48   | 0.804375299 | 0.278 | 0.059 | 2.43E-43    | 17 FSTL1      |
| 1.17E-36   | 0.801756353 | 0.295 | 0.079 | 3.75E-32    | 17 KANK2      |
| 5.48E-17   | 0.800891562 | 0.3   | 0.129 | 1.76E-12    | 17 BCL6       |
| 1.54E-15   | 0.800519984 | 0.641 | 0.431 | 4.94E-11    | 17 COL4A2     |
| 3.49E-25   | 0.799197567 | 0.789 | 0.583 | 1.12E-20    | 17 TNS1       |
| 4.76E-53   | 0.798101151 | 0.278 | 0.054 | 1.53E-48    | 17 CSRP2      |
| 4.92E-11   | 0.795800016 | 0.7   | 0.618 | 1.58E-06    | 17 RBMS1      |
| 2.36E-14   | 0.79578824  | 0.325 | 0.159 | 7.57E-10    | 17 MGST1      |
| 1.72E-31   | 0.794988265 | 0.291 | 0.085 | 5.51E-27    | 17 FMNL3      |

|            |             |       |       |             |                |
|------------|-------------|-------|-------|-------------|----------------|
| 2.61E-12   | 0.794020638 | 0.494 | 0.333 | 8.38E-08    | 17 PLS3        |
| 2.82E-30   | 0.793150983 | 0.447 | 0.167 | 9.05E-26    | 17 EYA4        |
| 2.55E-66   | 0.79312117  | 0.418 | 0.091 | 8.19E-62    | 17 EMCN        |
| 5.01E-11   | 0.791130784 | 0.595 | 0.481 | 1.61E-06    | 17 PKD2        |
| 2.74E-12   | 0.7909292   | 0.342 | 0.185 | 8.79E-08    | 17 PELI1       |
| 4.69E-21   | 0.790160976 | 0.81  | 0.717 | 1.51E-16    | 17 MKLN1       |
| 1.26E-10   | 0.789932515 | 0.316 | 0.18  | 4.05E-06    | 17 SLC12A2     |
| 3.33E-14   | 0.788901296 | 0.485 | 0.319 | 1.07E-09    | 17 INPP5A      |
| 4.25E-12   | 0.788606788 | 0.35  | 0.196 | 1.36E-07    | 17 RPS6KA5     |
| 2.13E-08   | 0.78502742  | 0.629 | 0.55  | 0.000683832 | 17 PDLIM5      |
| 3.18E-64   | 0.783804387 | 0.253 | 0.038 | 1.02E-59    | 17 MYL9        |
| 1.28E-13   | 0.783045387 | 0.346 | 0.179 | 4.10E-09    | 17 ANGPT1      |
| 1.45E-15   | 0.779102241 | 0.464 | 0.259 | 4.65E-11    | 17 PSD3        |
| 2.17E-05   | 0.775987725 | 0.316 | 0.239 | 0.69793551  | 17 SEPTIN7P2   |
| 5.01E-12   | 0.775832853 | 0.54  | 0.404 | 1.61E-07    | 17 SEPTIN7     |
| 2.53E-25   | 0.773761905 | 0.312 | 0.112 | 8.11E-21    | 17 ADCY6       |
| 1.14E-05   | 0.772171657 | 0.435 | 0.345 | 0.367150633 | 17 GLCC11      |
| 8.52E-09   | 0.76931958  | 0.473 | 0.356 | 0.000273631 | 17 ATP2A2      |
| 2.52E-24   | 0.769264004 | 0.388 | 0.156 | 8.10E-20    | 17 SIPA1L2     |
| 1.59E-12   | 0.769048154 | 0.586 | 0.456 | 5.10E-08    | 17 PACSIN2     |
| 8.07E-15   | 0.765066668 | 0.582 | 0.413 | 2.59E-10    | 17 MIR4435-2HG |
| 2.63E-35   | 0.762319834 | 0.295 | 0.08  | 8.44E-31    | 17 DDR2        |
| 8.61E-08   | 0.760335347 | 0.291 | 0.175 | 0.002764399 | 17 DTNA        |
| 2.19E-07   | 0.757036013 | 0.397 | 0.29  | 0.007044809 | 17 DSTN        |
| 1.07E-13   | 0.755907041 | 0.595 | 0.451 | 3.42E-09    | 17 CPSF6       |
| 6.58E-11   | 0.752346513 | 0.35  | 0.195 | 2.11E-06    | 17 ZFP36       |
| 1.59E-16   | 0.751785883 | 0.342 | 0.162 | 5.10E-12    | 17 TRERF1      |
| 1.69E-14   | 0.745908421 | 0.73  | 0.615 | 5.43E-10    | 17 FER         |
| 3.49E-08   | 0.74218046  | 0.511 | 0.395 | 0.001121021 | 17 PDGFC       |
| 1.22E-08   | 0.741262477 | 0.439 | 0.321 | 0.000391515 | 17 KLF9        |
| 0.00026221 | 0.739628363 | 0.329 | 0.264 | 1           | 17 DOCK3       |
| 1.36E-08   | 0.729023078 | 0.287 | 0.167 | 0.000437523 | 17 DGKD        |
| 2.82E-34   | 0.727201679 | 0.3   | 0.083 | 9.06E-30    | 17 NID1        |
| 3.19E-13   | 0.726510506 | 0.266 | 0.125 | 1.02E-08    | 17 LRIG1       |
| 5.46E-09   | 0.725758053 | 0.266 | 0.151 | 0.000175309 | 17 KLHL23      |
| 1.24E-25   | 0.724451495 | 0.262 | 0.081 | 3.99E-21    | 17 TBX2-AS1    |
| 1.47E-09   | 0.721118461 | 0.422 | 0.294 | 4.72E-05    | 17 LAMC1       |
| 5.73E-11   | 0.720048381 | 0.312 | 0.173 | 1.84E-06    | 17 ECE1        |
| 3.91E-10   | 0.717622648 | 0.46  | 0.319 | 1.26E-05    | 17 GTDC1       |
| 1.16E-15   | 0.71615569  | 0.557 | 0.374 | 3.72E-11    | 17 PIP4K2A     |
| 1.45E-14   | 0.710664885 | 0.616 | 0.42  | 4.66E-10    | 17 COL4A5      |
| 1.81E-15   | 0.707855475 | 0.713 | 0.599 | 5.81E-11    | 17 RBFOX2      |
| 2.30E-12   | 0.707139712 | 0.54  | 0.395 | 7.39E-08    | 17 PPP3CC      |
| 6.77E-17   | 0.707051429 | 0.262 | 0.104 | 2.17E-12    | 17 RHOB        |
| 6.92E-35   | 0.706421204 | 0.283 | 0.075 | 2.22E-30    | 17 OSBPL5      |
| 6.05E-09   | 0.705997268 | 0.257 | 0.135 | 0.000194279 | 17 SH3BP5      |
| 1.40E-55   | 0.700464745 | 0.257 | 0.044 | 4.50E-51    | 17 PDLIM7      |
| 1.20E-16   | 0.69975888  | 0.549 | 0.332 | 3.85E-12    | 17 ANKRD44     |
| 2.51E-07   | 0.699347674 | 0.506 | 0.418 | 0.008070499 | 17 RNF180      |
| 7.99E-30   | 0.699150753 | 0.27  | 0.076 | 2.57E-25    | 17 LRRC8C      |
| 5.35E-10   | 0.698425871 | 0.371 | 0.241 | 1.72E-05    | 17 KPNA5       |

|            |             |       |       |             |               |
|------------|-------------|-------|-------|-------------|---------------|
| 8.01E-08   | 0.697952736 | 0.473 | 0.368 | 0.002572603 | 17 SESN1      |
| 2.46E-07   | 0.695775728 | 0.578 | 0.494 | 0.007898293 | 17 HIF1A      |
| 1.65E-07   | 0.693044455 | 0.333 | 0.223 | 0.005313841 | 17 PDE5A      |
| 5.53E-05   | 0.691370791 | 0.376 | 0.287 | 1           | 17 MID1       |
| 3.51E-21   | 0.687104207 | 0.35  | 0.149 | 1.13E-16    | 17 TNS2       |
| 1.40E-15   | 0.686323712 | 0.641 | 0.475 | 4.49E-11    | 17 ASCC3      |
| 6.72E-11   | 0.685096993 | 0.473 | 0.342 | 2.16E-06    | 17 TNRC6C     |
| 2.92E-14   | 0.684082154 | 0.709 | 0.559 | 9.37E-10    | 17 ARID5B     |
| 9.52E-27   | 0.683302483 | 0.274 | 0.085 | 3.06E-22    | 17 INF2       |
| 6.23E-17   | 0.682355006 | 0.287 | 0.124 | 2.00E-12    | 17 CSRP1      |
| 2.13E-14   | 0.679281924 | 0.675 | 0.513 | 6.86E-10    | 17 ANKRD36C   |
| 1.79E-06   | 0.678942359 | 0.367 | 0.269 | 0.057410839 | 17 LONRF1     |
| 5.15E-14   | 0.677903587 | 0.384 | 0.211 | 1.65E-09    | 17 NAMPT      |
| 1.47E-20   | 0.672699274 | 0.844 | 0.635 | 4.72E-16    | 17 AKT3       |
| 1.54E-10   | 0.670333866 | 0.599 | 0.476 | 4.96E-06    | 17 ETV6       |
| 5.03E-11   | 0.669824336 | 0.565 | 0.46  | 1.62E-06    | 17 NBPFF19    |
| 5.43E-21   | 0.669723546 | 0.312 | 0.126 | 1.74E-16    | 17 MEF2D      |
| 1.92E-19   | 0.669173619 | 0.262 | 0.094 | 6.16E-15    | 17 NPY1R      |
| 2.80E-17   | 0.668841212 | 0.333 | 0.15  | 9.00E-13    | 17 RAB31      |
| 1.12E-10   | 0.666505178 | 0.506 | 0.379 | 3.60E-06    | 17 NAA35      |
| 1.98E-09   | 0.665537072 | 0.675 | 0.563 | 6.37E-05    | 17 MYO1E      |
| 2.04E-10   | 0.663157202 | 0.266 | 0.137 | 6.54E-06    | 17 SERTAD2    |
| 1.39E-09   | 0.663007401 | 0.392 | 0.253 | 4.48E-05    | 17 SNED1      |
| 2.32E-07   | 0.661210924 | 0.443 | 0.321 | 0.007449621 | 17 DUSP1      |
| 2.50E-10   | 0.659682928 | 0.266 | 0.134 | 8.02E-06    | 17 JUNB       |
| 1.55E-12   | 0.658752049 | 0.325 | 0.17  | 4.99E-08    | 17 ARHGAP44   |
| 2.24E-05   | 0.657526662 | 0.266 | 0.173 | 0.720397765 | 17 TIPARP     |
| 7.50E-10   | 0.654796953 | 0.523 | 0.394 | 2.41E-05    | 17 PHLPP1     |
| 3.58E-15   | 0.644308108 | 0.789 | 0.644 | 1.15E-10    | 17 TTC28      |
| 2.04E-14   | 0.639740897 | 0.743 | 0.56  | 6.56E-10    | 17 TSC22D1    |
| 1.19E-07   | 0.63843914  | 0.629 | 0.566 | 0.003826717 | 17 PAM        |
| 1.96E-26   | 0.634385217 | 0.266 | 0.08  | 6.29E-22    | 17 FBN1       |
| 2.48E-10   | 0.633327945 | 0.376 | 0.232 | 7.95E-06    | 17 GSN        |
| 2.76E-24   | 0.627948923 | 0.827 | 0.485 | 8.87E-20    | 17 PDE1A      |
| 2.60E-09   | 0.626008804 | 0.278 | 0.152 | 8.34E-05    | 17 FGFR1      |
| 5.24E-12   | 0.625626035 | 0.266 | 0.13  | 1.68E-07    | 17 NAF1       |
| 4.59E-08   | 0.622414742 | 0.43  | 0.313 | 0.001473633 | 17 MICU3      |
| 1.51E-17   | 0.621189874 | 0.3   | 0.124 | 4.84E-13    | 17 AFAP1L2    |
| 2.61E-06   | 0.62087664  | 0.515 | 0.457 | 0.083717283 | 17 BMPR1A     |
| 9.61E-08   | 0.619390566 | 0.38  | 0.251 | 0.003086372 | 17 HIVEP3     |
| 0.00102722 | 0.619358338 | 0.414 | 0.372 | 1           | 17 CACUL1     |
| 0.00030395 | 0.618115771 | 0.27  | 0.193 | 1           | 17 PRELID2    |
| 2.21E-26   | 0.617611108 | 0.253 | 0.073 | 7.11E-22    | 17 AC093423.2 |
| 3.15E-12   | 0.612663881 | 0.262 | 0.121 | 1.01E-07    | 17 JAM3       |
| 5.71E-05   | 0.611800894 | 0.498 | 0.421 | 1           | 17 GHR        |
| 6.92E-08   | 0.610303816 | 0.591 | 0.487 | 0.002221429 | 17 ESYT2      |
| 3.61E-12   | 0.610033175 | 0.388 | 0.215 | 1.16E-07    | 17 CYTOR      |
| 6.33E-05   | 0.608950255 | 0.599 | 0.574 | 1           | 17 USP53      |
| 4.13E-05   | 0.608660616 | 0.603 | 0.557 | 1           | 17 MRTFA      |
| 2.87E-09   | 0.607936658 | 0.489 | 0.369 | 9.22E-05    | 17 PITPNB     |
| 8.23E-07   | 0.607255823 | 0.359 | 0.245 | 0.02643026  | 17 JAZF1      |

|            |             |       |       |             |                 |
|------------|-------------|-------|-------|-------------|-----------------|
| 1.79E-07   | 0.605259351 | 0.316 | 0.203 | 0.00576408  | 17 LMNA         |
| 3.01E-08   | 0.604853301 | 0.262 | 0.152 | 0.000966842 | 17 PPP4R1L      |
| 1.02E-12   | 0.604534446 | 0.705 | 0.518 | 3.27E-08    | 17 NFIA         |
| 7.80E-14   | 0.602747495 | 0.65  | 0.503 | 2.51E-09    | 17 NBPF14       |
| 5.95E-06   | 0.600781787 | 0.426 | 0.355 | 0.191117677 | 17 ATP10D       |
| 0.00024282 | 0.59758257  | 0.477 | 0.432 | 1           | 17 FAM214A      |
| 2.93E-06   | 0.595099189 | 0.515 | 0.432 | 0.094229457 | 17 MCPH1        |
| 5.48E-08   | 0.593063513 | 0.578 | 0.441 | 0.001761162 | 17 THSD4        |
| 2.29E-06   | 0.590120276 | 0.612 | 0.578 | 0.073574727 | 17 CLASP2       |
| 3.18E-06   | 0.588499607 | 0.519 | 0.42  | 0.102081318 | 17 ANK2         |
| 8.48E-13   | 0.588464064 | 0.257 | 0.117 | 2.72E-08    | 17 HSPG2        |
| 1.36E-09   | 0.588084406 | 0.684 | 0.607 | 4.37E-05    | 17 FRYL         |
| 3.36E-06   | 0.586628835 | 0.502 | 0.423 | 0.107945568 | 17 ASAP1        |
| 4.50E-07   | 0.58390981  | 0.363 | 0.252 | 0.014455285 | 17 MARK1        |
| 6.27E-05   | 0.583508943 | 0.354 | 0.26  | 1           | 17 SYT1         |
| 4.80E-12   | 0.582998922 | 0.333 | 0.178 | 1.54E-07    | 17 PLSCR4       |
| 8.94E-07   | 0.582832214 | 0.439 | 0.333 | 0.028716064 | 17 CREB3L2      |
| 1.62E-06   | 0.582142833 | 0.709 | 0.665 | 0.051938536 | 17 LIMCH1       |
| 2.11E-06   | 0.581837093 | 0.565 | 0.48  | 0.067882475 | 17 COL18A1      |
| 8.70E-06   | 0.581593364 | 0.295 | 0.201 | 0.279537964 | 17 CBL          |
| 9.86E-08   | 0.581126828 | 0.561 | 0.479 | 0.003165586 | 17 RAP1B        |
| 2.80E-06   | 0.578731884 | 0.671 | 0.6   | 0.089826844 | 17 CTBP2        |
| 3.56E-06   | 0.578188151 | 0.405 | 0.295 | 0.114296252 | 17 PBX3         |
| 9.28E-11   | 0.576469062 | 0.722 | 0.612 | 2.98E-06    | 17 KLF12        |
| 1.91E-05   | 0.575955671 | 0.401 | 0.323 | 0.612952627 | 17 ALG13        |
| 1.62E-05   | 0.573841482 | 0.376 | 0.285 | 0.519888107 | 17 PLEKHA2      |
| 3.94E-24   | 0.573133814 | 0.637 | 0.4   | 1.27E-19    | 17 PLPP1        |
| 6.43E-07   | 0.571522944 | 0.342 | 0.222 | 0.020641049 | 17 GNAI1        |
| 5.94E-08   | 0.571380682 | 0.536 | 0.437 | 0.001907752 | 17 LRCH3        |
| 7.71E-06   | 0.56842115  | 0.388 | 0.304 | 0.247563786 | 17 TRAF3IP2-AS1 |
| 3.58E-09   | 0.568001084 | 0.354 | 0.217 | 0.000114851 | 17 LAMA5        |
| 4.52E-12   | 0.567512299 | 0.456 | 0.283 | 1.45E-07    | 17 PCDHGA1      |
| 2.64E-06   | 0.567298954 | 0.519 | 0.447 | 0.084739905 | 17 PHF14        |
| 8.14E-15   | 0.566828073 | 0.658 | 0.511 | 2.61E-10    | 17 ARGLU1       |
| 0.00189907 | 0.566621386 | 0.384 | 0.318 | 1           | 17 ZFP36L1      |
| 5.06E-10   | 0.56555155  | 0.392 | 0.246 | 1.62E-05    | 17 AC012531.3   |
| 1.93E-09   | 0.564145935 | 0.65  | 0.57  | 6.20E-05    | 17 UGGT2        |
| 1.26E-07   | 0.563271199 | 0.376 | 0.259 | 0.004051118 | 17 SEM1         |
| 0.00070133 | 0.562486197 | 0.27  | 0.202 | 1           | 17 MAPRE2       |
| 1.12E-14   | 0.562472655 | 0.3   | 0.14  | 3.59E-10    | 17 SLC44A2      |
| 0.00070754 | 0.561487467 | 0.409 | 0.344 | 1           | 17 PIK3R1       |
| 6.25E-05   | 0.560403004 | 0.451 | 0.382 | 1           | 17 PEAK1        |
| 5.97E-09   | 0.559233187 | 0.274 | 0.152 | 0.000191618 | 17 AMOTL1       |
| 8.44E-11   | 0.557870014 | 0.696 | 0.602 | 2.71E-06    | 17 TMEM131      |
| 0.00027592 | 0.557406976 | 0.641 | 0.622 | 1           | 17 PDE10A       |
| 1.28E-09   | 0.554343221 | 0.371 | 0.238 | 4.13E-05    | 17 CDS2         |
| 5.55E-06   | 0.550641158 | 0.308 | 0.2   | 0.17814954  | 17 GATA3        |
| 4.06E-09   | 0.545786652 | 0.283 | 0.159 | 0.000130239 | 17 GARNL3       |
| 0.0018806  | 0.545042187 | 0.376 | 0.315 | 1           | 17 GPRIN3       |
| 3.94E-05   | 0.54401831  | 0.582 | 0.548 | 1           | 17 AC093752.1   |
| 1.44E-06   | 0.543241992 | 0.456 | 0.366 | 0.046235725 | 17 MDM2         |

|            |             |       |       |             |                |
|------------|-------------|-------|-------|-------------|----------------|
| 9.97E-06   | 0.542124623 | 0.308 | 0.211 | 0.320199608 | 17 CYTH3       |
| 9.27E-06   | 0.541493935 | 0.515 | 0.443 | 0.297595677 | 17 RGL3        |
| 4.04E-11   | 0.538979751 | 0.494 | 0.34  | 1.30E-06    | 17 NAP1L1      |
| 0.00235171 | 0.538363237 | 0.338 | 0.277 | 1           | 17 SCTR        |
| 3.44E-07   | 0.537751469 | 0.418 | 0.295 | 0.01103792  | 17 CCND3       |
| 4.81E-05   | 0.535396997 | 0.384 | 0.305 | 1           | 17 BRWD3       |
| 0.00124815 | 0.535304571 | 0.3   | 0.234 | 1           | 17 ATP8B1      |
| 9.38E-07   | 0.532979247 | 0.713 | 0.667 | 0.030111734 | 17 RASA1       |
| 3.62E-07   | 0.53254491  | 0.485 | 0.381 | 0.011612644 | 17 ANO6        |
| 2.38E-12   | 0.531457696 | 0.848 | 0.806 | 7.65E-08    | 17 AC016831.6  |
| 8.57E-17   | 0.530600155 | 0.283 | 0.119 | 2.75E-12    | 17 CSNK1E      |
| 5.79E-05   | 0.529628723 | 0.384 | 0.301 | 1           | 17 ARFGAP3     |
| 7.43E-16   | 0.529204769 | 0.291 | 0.121 | 2.39E-11    | 17 COL6A2      |
| 8.43E-07   | 0.523954308 | 0.519 | 0.435 | 0.027084097 | 17 ZNF280D     |
| 0.00153829 | 0.512094494 | 0.414 | 0.373 | 1           | 17 FAM168A     |
| 9.53E-15   | 0.511690716 | 0.624 | 0.433 | 3.06E-10    | 17 VCL         |
| 8.00E-07   | 0.503457181 | 0.768 | 0.765 | 0.025695031 | 17 KIAA1217    |
| 2.94E-11   | 0.50030205  | 0.376 | 0.215 | 9.45E-07    | 17 HOXA3       |
| 2.99E-14   | 0.499235394 | 0.903 | 0.716 | 9.60E-10    | 17 ADAMTS9-AS2 |
| 3.54E-07   | 0.498735281 | 0.426 | 0.312 | 0.011373742 | 17 SPOP        |
| 0.00729584 | 0.49871713  | 0.308 | 0.268 | 1           | 17 SMARCA1     |
| 0.00842592 | 0.498707543 | 0.257 | 0.212 | 1           | 17 INMT-MINDY4 |
| 1.64E-05   | 0.498057991 | 0.574 | 0.523 | 0.526334234 | 17 NCKAP1      |
| 0.00758016 | 0.496864902 | 0.637 | 0.679 | 1           | 17 EXT1        |
| 3.02E-06   | 0.496329761 | 0.532 | 0.464 | 0.096861903 | 17 SMC5        |
| 7.42E-08   | 0.495535081 | 0.27  | 0.158 | 0.00238323  | 17 NR2F2       |
| 1.63E-07   | 0.494546875 | 0.354 | 0.229 | 0.00522781  | 17 SOBP        |
| 0.00018276 | 0.492958673 | 0.388 | 0.311 | 1           | 17 PALM2AKAP2  |
| 1.11E-06   | 0.491344026 | 0.451 | 0.353 | 0.035724739 | 17 SNX25       |
| 0.00061785 | 0.490176979 | 0.532 | 0.518 | 1           | 17 NEK7        |
| 4.55E-06   | 0.487978318 | 0.316 | 0.22  | 0.146140718 | 17 SH3PXD2A    |
| 9.42E-05   | 0.48738603  | 0.414 | 0.336 | 1           | 17 SPRED1      |
| 0.00650896 | 0.486953736 | 0.494 | 0.48  | 1           | 17 SNRK        |
| 1.35E-06   | 0.48581163  | 0.456 | 0.347 | 0.043471834 | 17 PER1        |
| 0.00032343 | 0.483558635 | 0.624 | 0.577 | 1           | 17 FOXO3       |
| 0.00015137 | 0.479419538 | 0.27  | 0.195 | 1           | 17 FPGT-TNNI3K |
| 0.00050806 | 0.479240706 | 0.468 | 0.423 | 1           | 17 SPRED2      |
| 0.00085327 | 0.478827336 | 0.485 | 0.426 | 1           | 17 IL6ST       |
| 3.85E-05   | 0.478275561 | 0.447 | 0.365 | 1           | 17 VPS45       |
| 1.91E-06   | 0.477190297 | 0.274 | 0.174 | 0.061206888 | 17 CCDC88A     |
| 4.07E-06   | 0.476960672 | 0.443 | 0.349 | 0.130828998 | 17 CRTC3       |
| 1.14E-12   | 0.472933718 | 0.751 | 0.566 | 3.67E-08    | 17 DST         |
| 4.12E-05   | 0.472617835 | 0.367 | 0.288 | 1           | 17 ARPC2       |
| 7.02E-06   | 0.467319496 | 0.384 | 0.278 | 0.225433441 | 17 STIM1       |
| 0.00734483 | 0.467171276 | 0.312 | 0.258 | 1           | 17 MTHFD1L     |
| 3.91E-09   | 0.465911471 | 0.43  | 0.276 | 0.000125598 | 17 SEMA5A      |
| 6.64E-07   | 0.465626711 | 0.464 | 0.355 | 0.021338412 | 17 ATF7-NPFF   |
| 8.07E-06   | 0.464835764 | 0.397 | 0.302 | 0.259036253 | 17 CYFIP1      |
| 1.39E-05   | 0.463662945 | 0.519 | 0.444 | 0.445592009 | 17 IQGAP1      |
| 8.76E-06   | 0.46235654  | 0.367 | 0.274 | 0.281190908 | 17 MTMR2       |
| 0.00790041 | 0.46146209  | 0.312 | 0.269 | 1           | 17 BMERB1      |

|            |             |       |       |             |               |
|------------|-------------|-------|-------|-------------|---------------|
| 0.00011656 | 0.461287906 | 0.494 | 0.395 | 1           | 17 ZDHC14     |
| 8.93E-06   | 0.459772412 | 0.354 | 0.252 | 0.286847645 | 17 MYLK       |
| 0.00011611 | 0.457350515 | 0.599 | 0.572 | 1           | 17 RABGAP1    |
| 0.00032782 | 0.456231034 | 0.397 | 0.316 | 1           | 17 ADCY9      |
| 2.32E-07   | 0.454495577 | 0.84  | 0.799 | 0.00746059  | 17 SBF2       |
| 0.00020451 | 0.454445945 | 0.65  | 0.632 | 1           | 17 FTO        |
| 1.84E-06   | 0.454187642 | 0.468 | 0.374 | 0.059240426 | 17 ITGB1      |
| 0.00058063 | 0.452950816 | 0.304 | 0.236 | 1           | 17 OSMR-AS1   |
| 8.81E-09   | 0.452100017 | 0.692 | 0.572 | 0.000282861 | 17 CBLB       |
| 9.80E-07   | 0.451309337 | 0.692 | 0.655 | 0.031481823 | 17 HERC1      |
| 2.21E-05   | 0.449570391 | 0.485 | 0.412 | 0.7100986   | 17 NBP26      |
| 0.00292809 | 0.449350501 | 0.359 | 0.31  | 1           | 17 ADAM17     |
| 8.44E-06   | 0.449334191 | 0.62  | 0.573 | 0.270935644 | 17 PHKB       |
| 6.08E-10   | 0.448106421 | 0.27  | 0.139 | 1.95E-05    | 17 AC025171.1 |
| 0.00033028 | 0.447541526 | 0.502 | 0.452 | 1           | 17 SMURF1     |
| 0.00171172 | 0.446031399 | 0.443 | 0.397 | 1           | 17 CAMSAP2    |
| 0.00269465 | 0.442761618 | 0.578 | 0.567 | 1           | 17 METTL15    |
| 2.83E-06   | 0.440076649 | 0.371 | 0.271 | 0.090858725 | 17 NBP10      |
| 1.76E-08   | 0.439499143 | 0.662 | 0.547 | 0.000564816 | 17 TJP1       |
| 5.25E-13   | 0.439272468 | 0.287 | 0.136 | 1.68E-08    | 17 LINC01226  |
| 0.00140802 | 0.438841144 | 0.435 | 0.385 | 1           | 17 EPN2       |
| 1.71E-06   | 0.43820166  | 0.827 | 0.786 | 0.054792015 | 17 BCAS3      |
| 0.0006263  | 0.431734269 | 0.409 | 0.343 | 1           | 17 PARVA      |
| 0.00095638 | 0.431456503 | 0.502 | 0.437 | 1           | 17 EGFR       |
| 0.00830723 | 0.431259273 | 0.565 | 0.548 | 1           | 17 KAT6B      |
| 2.65E-07   | 0.427687632 | 0.283 | 0.17  | 0.00851192  | 17 LINC01359  |
| 0.00272439 | 0.424837418 | 0.481 | 0.452 | 1           | 17 SPECC1L    |
| 0.0001787  | 0.424653303 | 0.397 | 0.317 | 1           | 17 SH3BGR1    |
| 0.00056178 | 0.420532893 | 0.553 | 0.513 | 1           | 17 RB1        |
| 0.00154342 | 0.41654871  | 0.65  | 0.627 | 1           | 17 GSK3B      |
| 1.09E-05   | 0.416522534 | 0.62  | 0.537 | 0.349236752 | 17 DPYD       |
| 0.00140896 | 0.416046438 | 0.595 | 0.595 | 1           | 17 BBX        |
| 2.01E-05   | 0.414370714 | 0.743 | 0.698 | 0.646926955 | 17 NCOA1      |
| 0.00847667 | 0.414053285 | 0.582 | 0.568 | 1           | 17 YAP1       |
| 0.00553127 | 0.410126688 | 0.54  | 0.534 | 1           | 17 RIC1       |
| 1.08E-09   | 0.409356971 | 0.84  | 0.74  | 3.48E-05    | 17 PICALM     |
| 0.00610372 | 0.409253516 | 0.401 | 0.368 | 1           | 17 CDC27      |
| 0.00010051 | 0.408353952 | 0.586 | 0.519 | 1           | 17 KIAA1328   |
| 0.00835082 | 0.405507996 | 0.57  | 0.557 | 1           | 17 SOS2       |
| 0.00228731 | 0.402209753 | 0.262 | 0.2   | 1           | 17 ITGA3      |
| 0.0010435  | 0.402198694 | 0.376 | 0.301 | 1           | 17 RAPGEF3    |
| 5.95E-05   | 0.40183328  | 0.468 | 0.398 | 1           | 17 RBMX       |
| 2.74E-05   | 0.401060113 | 0.498 | 0.421 | 0.879195502 | 17 TIAM2      |
| 0.00024134 | 0.39754773  | 0.544 | 0.51  | 1           | 17 EPC1       |
| 0.00015594 | 0.39692073  | 0.278 | 0.189 | 1           | 17 PCED1B     |
| 0.00274265 | 0.394850258 | 0.405 | 0.361 | 1           | 17 LINC02256  |
| 7.81E-06   | 0.394656884 | 0.688 | 0.639 | 0.25069938  | 17 ATXN2      |
| 0.00316397 | 0.394090971 | 0.3   | 0.247 | 1           | 17 AP3S1      |
| 0.00100168 | 0.3917054   | 0.316 | 0.248 | 1           | 17 SKI        |
| 0.00470151 | 0.391514342 | 0.329 | 0.28  | 1           | 17 SP3        |
| 5.55E-05   | 0.391273205 | 0.494 | 0.418 | 1           | 17 MPDZ       |

|            |             |       |       |             |               |
|------------|-------------|-------|-------|-------------|---------------|
| 0.00193579 | 0.387937101 | 0.485 | 0.449 | 1           | 17 STXBP5     |
| 7.35E-05   | 0.386894146 | 0.57  | 0.52  | 1           | 17 CEP350     |
| 6.63E-05   | 0.386123023 | 0.713 | 0.694 | 1           | 17 SENP6      |
| 1.29E-05   | 0.386045681 | 0.747 | 0.696 | 0.415063047 | 17 AKAP13     |
| 0.00342582 | 0.385185662 | 0.519 | 0.506 | 1           | 17 RFX3       |
| 0.00018894 | 0.38434109  | 0.65  | 0.627 | 1           | 17 DDX5       |
| 0.00372614 | 0.383503566 | 0.43  | 0.396 | 1           | 17 AL451062.2 |
| 0.00319103 | 0.382348008 | 0.586 | 0.561 | 1           | 17 ACYP2      |
| 0.00205324 | 0.380715416 | 0.536 | 0.497 | 1           | 17 HIPK3      |
| 0.00603325 | 0.379407171 | 0.527 | 0.521 | 1           | 17 MYCBP2     |
| 4.04E-06   | 0.379051538 | 0.371 | 0.272 | 0.129758786 | 17 CPSF7      |
| 0.00259388 | 0.378803052 | 0.253 | 0.196 | 1           | 17 CCNH       |
| 6.62E-05   | 0.37755616  | 0.464 | 0.387 | 1           | 17 PJA2       |
| 3.84E-05   | 0.376993172 | 0.654 | 0.624 | 1           | 17 HERC4      |
| 0.00521135 | 0.376705457 | 0.384 | 0.345 | 1           | 17 NDFIP1     |
| 0.00051499 | 0.375756398 | 0.734 | 0.679 | 1           | 17 FNDC3A     |
| 0.00659777 | 0.372358276 | 0.278 | 0.227 | 1           | 17 FAM228B    |
| 0.00043095 | 0.369416557 | 0.494 | 0.428 | 1           | 17 MYH9       |
| 1.70E-05   | 0.369257438 | 0.671 | 0.645 | 0.54546189  | 17 CSNK1A1    |
| 2.46E-05   | 0.367257319 | 0.27  | 0.178 | 0.790245636 | 17 RUBCN      |
| 0.00103992 | 0.367143319 | 0.591 | 0.58  | 1           | 17 EPS15      |
| 0.00447956 | 0.366072081 | 0.287 | 0.23  | 1           | 17 STRADA     |
| 0.00056674 | 0.365965324 | 0.439 | 0.388 | 1           | 17 TMEM165    |
| 0.00053664 | 0.364525413 | 0.414 | 0.339 | 1           | 17 ZNF532     |
| 0.00622146 | 0.36279968  | 0.46  | 0.439 | 1           | 17 RAP1A      |
| 0.00039403 | 0.362167402 | 0.338 | 0.261 | 1           | 17 TRPC1      |
| 6.93E-05   | 0.361814048 | 0.662 | 0.628 | 1           | 17 ARID4B     |
| 0.00082765 | 0.356983143 | 0.435 | 0.355 | 1           | 17 AASS       |
| 0.00377255 | 0.356858593 | 0.536 | 0.505 | 1           | 17 PHF21A     |
| 9.56E-06   | 0.354437759 | 0.384 | 0.281 | 0.307134777 | 17 CERS6      |
| 2.37E-05   | 0.353423752 | 0.747 | 0.706 | 0.762507321 | 17 SON        |
| 0.0037001  | 0.351472259 | 0.447 | 0.415 | 1           | 17 MPRIP      |
| 0.00077329 | 0.351472096 | 0.734 | 0.733 | 1           | 17 STAG1      |
| 0.00120785 | 0.349436662 | 0.561 | 0.534 | 1           | 17 PTBP2      |
| 1.33E-05   | 0.346400634 | 0.329 | 0.221 | 0.427268331 | 17 ST3GAL1    |
| 0.00018515 | 0.345055452 | 0.608 | 0.556 | 1           | 17 AEBP2      |
| 0.00517152 | 0.343968329 | 0.477 | 0.429 | 1           | 17 SKAP2      |
| 0.00639732 | 0.341641925 | 0.333 | 0.286 | 1           | 17 AC133644.2 |
| 0.00277066 | 0.33683275  | 0.511 | 0.461 | 1           | 17 PCGF5      |
| 0.00281851 | 0.336730939 | 0.443 | 0.407 | 1           | 17 RYK        |
| 9.64E-06   | 0.335474747 | 0.696 | 0.658 | 0.309553198 | 17 KMT2E      |
| 0.00013694 | 0.33399467  | 0.823 | 0.804 | 1           | 17 TCF12      |
| 0.00925226 | 0.333065443 | 0.346 | 0.306 | 1           | 17 AL731577.2 |
| 0.00173897 | 0.332211353 | 0.3   | 0.236 | 1           | 17 ARMC2      |
| 0.00266307 | 0.331580685 | 0.27  | 0.21  | 1           | 17 BAZ2A      |
| 0.0002914  | 0.326891927 | 0.308 | 0.224 | 1           | 17 HK1        |
| 1.22E-08   | 0.326098442 | 0.443 | 0.274 | 0.000390616 | 17 سنتب1      |
| 0.00993327 | 0.324240619 | 0.435 | 0.407 | 1           | 17 FBXW4      |
| 4.74E-05   | 0.322937041 | 0.291 | 0.191 | 1           | 17 PLXNA2     |
| 0.00824639 | 0.315000754 | 0.464 | 0.431 | 1           | 17 ERCC6L2    |
| 1.28E-05   | 0.313765145 | 0.802 | 0.767 | 0.411622872 | 17 ASH1L      |



|            |             |       |       |             |    |            |
|------------|-------------|-------|-------|-------------|----|------------|
| 6.75E-05   | 0.313310011 | 0.722 | 0.688 | 1           | 17 | TRIO       |
| 0.00111318 | 0.309613956 | 0.92  | 0.935 | 1           | 17 | MT-RNR1    |
| 0.00410054 | 0.308669448 | 0.519 | 0.477 | 1           | 17 | ADD1       |
| 3.59E-05   | 0.304434617 | 0.654 | 0.555 | 1           | 17 | STARD13    |
| 0.0043593  | 0.304065769 | 0.481 | 0.443 | 1           | 17 | FUS        |
| 0.00471271 | 0.303853003 | 0.65  | 0.618 | 1           | 17 | GPATCH8    |
| 0.00042934 | 0.300254322 | 0.797 | 0.772 | 1           | 17 | AFF1       |
| 0.00546353 | 0.299447445 | 0.253 | 0.196 | 1           | 17 | RAB27A     |
| 0.00825829 | 0.297180832 | 0.359 | 0.305 | 1           | 17 | ZNF37BP    |
| 0.00111967 | 0.294393897 | 0.595 | 0.533 | 1           | 17 | HIVEP2     |
| 0.00640965 | 0.292878344 | 0.342 | 0.284 | 1           | 17 | INPP4A     |
| 0.0008252  | 0.292477546 | 0.7   | 0.684 | 1           | 17 | MON2       |
| 0.00590354 | 0.291637049 | 0.485 | 0.467 | 1           | 17 | UBR1       |
| 1.70E-05   | 0.288630278 | 0.709 | 0.659 | 0.544437957 | 17 | UBR3       |
| 0.00608425 | 0.288417509 | 0.65  | 0.65  | 1           | 17 | TNKS       |
| 0.00165559 | 0.287941151 | 0.578 | 0.546 | 1           | 17 | SMCHD1     |
| 0.00373138 | 0.287231291 | 0.489 | 0.456 | 1           | 17 | SRSF10     |
| 0.0001495  | 0.28198349  | 0.582 | 0.485 | 1           | 17 | POU2F1     |
| 0.00298035 | 0.276318174 | 0.519 | 0.485 | 1           | 17 | TLK2       |
| 9.45E-05   | 0.273613998 | 0.776 | 0.7   | 1           | 17 | ZSWIM6     |
| 0.00350722 | 0.273051907 | 0.624 | 0.62  | 1           | 17 | USP47      |
| 8.00E-06   | 0.267927093 | 0.511 | 0.371 | 0.256797611 | 17 | MYO1B      |
| 0.00401366 | 0.267129092 | 0.608 | 0.616 | 1           | 17 | OGA        |
| 0.00966298 | 0.263342908 | 0.333 | 0.282 | 1           | 17 | NISCH      |
| 0.00146851 | 0.258905156 | 0.797 | 0.812 | 1           | 17 | PRH1       |
| 0.00477198 | 0.253816638 | 0.291 | 0.235 | 1           | 17 | IDS        |
| 6.49E-05   | 0.252926441 | 0.802 | 0.758 | 1           | 17 | VPS13B     |
| 0.009495   | 0.252859664 | 0.595 | 0.582 | 1           | 17 | PIAS1      |
| 9.95E-145  | 3.765505774 | 0.886 | 0.276 | 3.19E-140   | 18 | CALD1      |
| 0          | 3.617226717 | 0.532 | 0.01  | 0           | 18 | C7         |
| 1.82E-147  | 3.603057101 | 0.716 | 0.147 | 5.83E-143   | 18 | NEGR1      |
| 6.57E-287  | 3.02812589  | 0.572 | 0.043 | 2.11E-282   | 18 | CCN1       |
| 1.96E-145  | 2.998635518 | 0.925 | 0.272 | 6.30E-141   | 18 | AC098650.1 |
| 0          | 2.925416958 | 0.622 | 0.035 | 0           | 18 | SYNPO2     |
| 1.81E-278  | 2.914297566 | 0.776 | 0.082 | 5.81E-274   | 18 | EBF1       |
| 1.29E-171  | 2.858875069 | 0.741 | 0.124 | 4.13E-167   | 18 | SLIT3      |
| 7.26E-135  | 2.84915394  | 0.642 | 0.117 | 2.33E-130   | 18 | TSHZ2      |
| 0          | 2.80319586  | 0.667 | 0.053 | 0           | 18 | SVEP1      |
| 4.24E-91   | 2.799013019 | 0.811 | 0.344 | 1.36E-86    | 18 | ITGA1      |
| 1.85E-37   | 2.683035623 | 0.622 | 0.325 | 5.95E-33    | 18 | COL4A1     |
| 2.25E-53   | 2.664273788 | 0.398 | 0.097 | 7.22E-49    | 18 | THBS1      |
| 1.49E-204  | 2.638151209 | 0.433 | 0.032 | 4.77E-200   | 18 | SLC2A3     |
| 3.67E-144  | 2.627885446 | 0.672 | 0.125 | 1.18E-139   | 18 | MEIS1      |
| 6.69E-130  | 2.619617635 | 0.771 | 0.182 | 2.15E-125   | 18 | ZFPM2      |
| 4.49E-70   | 2.61363915  | 0.502 | 0.13  | 1.44E-65    | 18 | ATRNL1     |
| 2.03E-46   | 2.594250647 | 0.512 | 0.178 | 6.52E-42    | 18 | FOS        |
| 2.22E-156  | 2.579556362 | 0.498 | 0.06  | 7.14E-152   | 18 | GUCY1A2    |
| 1.46E-294  | 2.570817766 | 0.463 | 0.026 | 4.70E-290   | 18 | MGP        |
| 1.12E-62   | 2.524921136 | 0.831 | 0.548 | 3.61E-58    | 18 | PDLIM5     |
| 1.05E-110  | 2.523051453 | 0.647 | 0.134 | 3.38E-106   | 18 | AKAP12     |
| 2.30E-140  | 2.52107397  | 0.667 | 0.12  | 7.38E-136   | 18 | RBMS3      |

|           |             |       |       |           |               |
|-----------|-------------|-------|-------|-----------|---------------|
| 3.66E-66  | 2.507150469 | 0.647 | 0.235 | 1.18E-61  | 18 SORBS1     |
| 6.75E-49  | 2.504029134 | 0.632 | 0.29  | 2.17E-44  | 18 DMD        |
| 6.94E-91  | 2.502796328 | 0.517 | 0.103 | 2.23E-86  | 18 LHFPL6     |
| 1.43E-51  | 2.501763596 | 0.602 | 0.236 | 4.58E-47  | 18 UBC        |
| 4.92E-138 | 2.486550606 | 0.418 | 0.046 | 1.58E-133 | 18 COL12A1    |
| 3.05E-87  | 2.469014858 | 0.642 | 0.162 | 9.81E-83  | 18 TMTC1      |
| 1.53E-258 | 2.46282057  | 0.532 | 0.041 | 4.91E-254 | 18 CDH11      |
| 8.77E-31  | 2.44844983  | 0.453 | 0.184 | 2.82E-26  | 18 ROBO1      |
| 1.05E-241 | 2.422086324 | 0.532 | 0.044 | 3.36E-237 | 18 ABCA8      |
| 6.63E-218 | 2.403158598 | 0.836 | 0.12  | 2.13E-213 | 18 MEIS2      |
| 6.41E-183 | 2.394023572 | 0.592 | 0.071 | 2.06E-178 | 18 NFASC      |
| 1.00E-48  | 2.359824051 | 0.572 | 0.221 | 3.22E-44  | 18 NR4A1      |
| 3.49E-18  | 2.350244436 | 0.672 | 0.573 | 1.12E-13  | 18 USP53      |
| 1.48E-146 | 2.345277568 | 0.652 | 0.11  | 4.77E-142 | 18 AFF3       |
| 1.89E-52  | 2.333866412 | 0.507 | 0.164 | 6.06E-48  | 18 ZEB2       |
| 4.57E-97  | 2.330648133 | 0.542 | 0.107 | 1.47E-92  | 18 GNA14      |
| 2.28E-65  | 2.288222605 | 0.597 | 0.186 | 7.32E-61  | 18 HSPA1B     |
| 1.33E-89  | 2.271148949 | 0.448 | 0.079 | 4.28E-85  | 18 FBN1       |
| 5.13E-153 | 2.243222528 | 0.746 | 0.137 | 1.65E-148 | 18 CACNA1C    |
| 8.46E-95  | 2.238166297 | 0.433 | 0.071 | 2.72E-90  | 18 LPAR1      |
| 0         | 2.173083719 | 0.438 | 0.007 | 0         | 18 COL1A2     |
| 1.29E-43  | 2.146802464 | 0.259 | 0.05  | 4.15E-39  | 18 FOSB       |
| 0         | 2.137428355 | 0.378 | 0.016 | 0         | 18 MOXD1      |
| 3.86E-140 | 2.102878821 | 0.542 | 0.077 | 1.24E-135 | 18 PID1       |
| 3.14E-299 | 2.097701162 | 0.498 | 0.03  | 1.01E-294 | 18 FBLN5      |
| 4.21E-111 | 2.087848306 | 0.642 | 0.14  | 1.35E-106 | 18 EPB41L2    |
| 2.13E-218 | 2.081568096 | 0.478 | 0.038 | 6.83E-214 | 18 CPED1      |
| 1.18E-77  | 2.069526841 | 0.498 | 0.114 | 3.80E-73  | 18 ABCA6      |
| 4.58E-72  | 2.053626343 | 0.532 | 0.134 | 1.47E-67  | 18 HSPA1A     |
| 1.97E-37  | 2.047891521 | 0.701 | 0.451 | 6.31E-33  | 18 PALLD      |
| 2.54E-19  | 2.011339874 | 0.274 | 0.103 | 8.17E-15  | 18 GLUL       |
| 2.81E-47  | 1.989852102 | 0.403 | 0.108 | 9.03E-43  | 18 A2M        |
| 1.09E-68  | 1.97895217  | 0.607 | 0.19  | 3.51E-64  | 18 NR2F1-AS1  |
| 2.32E-49  | 1.969858347 | 0.831 | 0.603 | 7.45E-45  | 18 AC012409.2 |
| 0         | 1.965603796 | 0.473 | 0.013 | 0         | 18 CARMN      |
| 1.22E-29  | 1.938869323 | 0.274 | 0.075 | 3.93E-25  | 18 CYP4Z2P    |
| 3.43E-69  | 1.898535164 | 0.318 | 0.051 | 1.10E-64  | 18 GEM        |
| 4.12E-25  | 1.887246487 | 0.512 | 0.265 | 1.32E-20  | 18 LAMA2      |
| 3.46E-87  | 1.869799903 | 0.537 | 0.113 | 1.11E-82  | 18 RAPGEF5    |
| 2.68E-77  | 1.867664373 | 0.428 | 0.082 | 8.62E-73  | 18 TENT5A     |
| 0         | 1.834410952 | 0.393 | 0.016 | 0         | 18 AEBP1      |
| 6.78E-35  | 1.831567362 | 0.672 | 0.403 | 2.18E-30  | 18 MAP3K5     |
| 2.41E-77  | 1.82400771  | 0.453 | 0.093 | 7.75E-73  | 18 ABCA9-AS1  |
| 8.39E-38  | 1.802992778 | 0.512 | 0.204 | 2.70E-33  | 18 ESR1       |
| 2.05E-12  | 1.79417255  | 0.473 | 0.343 | 6.58E-08  | 18 PIK3R1     |
| 2.61E-55  | 1.78712649  | 0.652 | 0.26  | 8.37E-51  | 18 TPM1       |
| 5.43E-50  | 1.786932395 | 0.343 | 0.076 | 1.74E-45  | 18 DCLK1      |
| 2.87E-79  | 1.786360007 | 0.463 | 0.091 | 9.23E-75  | 18 GRK5       |
| 3.72E-51  | 1.780444967 | 0.522 | 0.167 | 1.19E-46  | 18 DLC1       |
| 9.72E-16  | 1.779868678 | 0.438 | 0.248 | 3.12E-11  | 18 SYN3       |
| 5.07E-47  | 1.76652689  | 0.403 | 0.107 | 1.63E-42  | 18 C1orf21    |

|           |             |       |       |           |              |
|-----------|-------------|-------|-------|-----------|--------------|
| 3.57E-21  | 1.765232057 | 0.602 | 0.395 | 1.15E-16  | 18 INPP4B    |
| 1.12E-120 | 1.763064733 | 0.368 | 0.04  | 3.59E-116 | 18 ADAMTS12  |
| 5.73E-70  | 1.75817935  | 0.403 | 0.08  | 1.84E-65  | 18 DDR2      |
| 5.08E-44  | 1.755192036 | 0.816 | 0.589 | 1.63E-39  | 18 MIR99AHG  |
| 4.47E-88  | 1.736645575 | 0.468 | 0.088 | 1.43E-83  | 18 ANTXR1    |
| 3.37E-16  | 1.730830362 | 0.373 | 0.19  | 1.08E-11  | 18 SPECC1    |
| 5.35E-28  | 1.728984279 | 0.662 | 0.431 | 1.72E-23  | 18 COL4A2    |
| 1.81E-146 | 1.723370931 | 0.473 | 0.054 | 5.81E-142 | 18 RUNX1T1   |
| 1.80E-44  | 1.72046375  | 0.488 | 0.167 | 5.77E-40  | 18 TPM4      |
| 1.50E-41  | 1.713218328 | 0.413 | 0.124 | 4.82E-37  | 18 LTBP1     |
| 1.36E-22  | 1.710933274 | 0.254 | 0.079 | 4.38E-18  | 18 NR4A3     |
| 9.36E-246 | 1.708523511 | 0.328 | 0.015 | 3.01E-241 | 18 ADH1B     |
| 4.95E-10  | 1.708126917 | 0.368 | 0.246 | 1.59E-05  | 18 DDAH1     |
| 6.57E-31  | 1.676060043 | 0.498 | 0.216 | 2.11E-26  | 18 KALRN     |
| 1.43E-79  | 1.675087584 | 0.478 | 0.097 | 4.59E-75  | 18 MSRB3     |
| 6.46E-53  | 1.66863194  | 0.323 | 0.065 | 2.08E-48  | 18 STAMBPL1  |
| 1.56E-85  | 1.662544123 | 0.303 | 0.037 | 5.01E-81  | 18 CRISPLD2  |
| 1.88E-27  | 1.651700247 | 0.831 | 0.764 | 6.05E-23  | 18 KIAA1217  |
| 7.52E-94  | 1.647571498 | 0.458 | 0.074 | 2.41E-89  | 18 MEG3      |
| 6.03E-49  | 1.638037164 | 0.905 | 0.624 | 1.94E-44  | 18 PRKG1     |
| 1.46E-132 | 1.635612601 | 0.413 | 0.046 | 4.68E-128 | 18 LAMA4     |
| 8.36E-91  | 1.6264305   | 0.303 | 0.036 | 2.68E-86  | 18 MAP1B     |
| 3.90E-219 | 1.625722741 | 0.428 | 0.031 | 1.25E-214 | 18 C1S       |
| 5.05E-45  | 1.619093531 | 0.483 | 0.162 | 1.62E-40  | 18 RFTN1     |
| 1.58E-155 | 1.612070396 | 0.348 | 0.028 | 5.09E-151 | 18 DCN       |
| 4.48E-17  | 1.611127758 | 0.423 | 0.224 | 1.44E-12  | 18 ADAMTSL1  |
| 1.41E-31  | 1.604417195 | 0.274 | 0.07  | 4.54E-27  | 18 SLC7A2    |
| 1.64E-34  | 1.600659338 | 0.766 | 0.517 | 5.26E-30  | 18 NFIA      |
| 5.80E-21  | 1.590977715 | 0.343 | 0.138 | 1.86E-16  | 18 ATF3      |
| 2.74E-39  | 1.589219003 | 0.507 | 0.182 | 8.80E-35  | 18 ADAMTSL3  |
| 6.06E-48  | 1.586672307 | 0.363 | 0.086 | 1.95E-43  | 18 SULF1     |
| 5.51E-66  | 1.585533883 | 0.627 | 0.182 | 1.77E-61  | 18 FBXL7     |
| 3.69E-18  | 1.581699908 | 0.413 | 0.21  | 1.19E-13  | 18 OSMR      |
| 1.43E-22  | 1.567176195 | 0.343 | 0.13  | 4.58E-18  | 18 COL8A1    |
| 4.34E-31  | 1.565137078 | 0.378 | 0.126 | 1.39E-26  | 18 NAV3      |
| 7.62E-91  | 1.564630608 | 0.408 | 0.063 | 2.45E-86  | 18 LINC01197 |
| 3.02E-45  | 1.56421137  | 0.483 | 0.161 | 9.69E-41  | 18 TRERF1    |
| 7.41E-10  | 1.562742512 | 0.478 | 0.363 | 2.38E-05  | 18 HSP90AA1  |
| 1.21E-29  | 1.552220651 | 0.289 | 0.079 | 3.89E-25  | 18 PLCXD3    |
| 4.86E-49  | 1.550274789 | 0.463 | 0.137 | 1.56E-44  | 18 FLNA      |
| 3.76E-14  | 1.548667923 | 0.338 | 0.174 | 1.21E-09  | 18 RIPOR3    |
| 4.27E-65  | 1.544275906 | 0.328 | 0.055 | 1.37E-60  | 18 CD44      |
| 2.57E-38  | 1.528251936 | 0.662 | 0.321 | 8.24E-34  | 18 NRP1      |
| 1.49E-21  | 1.525666441 | 0.418 | 0.194 | 4.79E-17  | 18 ZFP36     |
| 3.26E-42  | 1.521913766 | 0.498 | 0.177 | 1.05E-37  | 18 PLSCR4    |
| 1.90E-57  | 1.511301736 | 0.378 | 0.082 | 6.12E-53  | 18 NID1      |
| 1.62E-29  | 1.511282699 | 0.617 | 0.326 | 5.21E-25  | 18 LDLRAD4   |
| 3.08E-18  | 1.501111282 | 0.438 | 0.241 | 9.89E-14  | 18 SLC38A2   |
| 1.42E-31  | 1.496184292 | 0.662 | 0.4   | 4.55E-27  | 18 PLPP1     |
| 1.10E-101 | 1.491847734 | 0.343 | 0.04  | 3.53E-97  | 18 FLRT2     |
| 6.06E-23  | 1.49159453  | 0.383 | 0.156 | 1.95E-18  | 18 EGR1      |

|            |             |       |       |             |              |
|------------|-------------|-------|-------|-------------|--------------|
| 1.85E-99   | 1.490148577 | 0.353 | 0.044 | 5.94E-95    | 18 FHL2      |
| 2.89E-48   | 1.487512376 | 0.378 | 0.093 | 9.27E-44    | 18 NPY1R     |
| 1.29E-79   | 1.487462287 | 0.338 | 0.05  | 4.15E-75    | 18 ABCA9     |
| 4.31E-296  | 1.475244701 | 0.368 | 0.016 | 1.38E-291   | 18 GLI2      |
| 4.51E-276  | 1.470885394 | 0.294 | 0.01  | 1.45E-271   | 18 COL3A1    |
| 8.66E-61   | 1.469964579 | 0.338 | 0.063 | 2.78E-56    | 18 FILIP1    |
| 0          | 1.468456485 | 0.318 | 0.011 | 0           | 18 COL16A1   |
| 1.31E-49   | 1.459817548 | 0.438 | 0.122 | 4.21E-45    | 18 ACTN1     |
| 0.00390784 | 1.45860908  | 0.264 | 0.213 | 1           | 18 NAMPT     |
| 6.35E-38   | 1.45473911  | 0.647 | 0.335 | 2.04E-33    | 18 LIMA1     |
| 6.83E-97   | 1.45294353  | 0.403 | 0.058 | 2.19E-92    | 18 ZFPM2-AS1 |
| 3.13E-13   | 1.443535614 | 0.413 | 0.242 | 1.01E-08    | 18 ARHGAP42  |
| 3.73E-12   | 1.439141287 | 0.303 | 0.156 | 1.20E-07    | 18 CCDC102B  |
| 3.50E-33   | 1.433657812 | 0.403 | 0.137 | 1.12E-28    | 18 NCALD     |
| 1.85E-27   | 1.423438834 | 0.398 | 0.153 | 5.93E-23    | 18 JUN       |
| 2.40E-30   | 1.422183422 | 0.756 | 0.549 | 7.71E-26    | 18 PDE3A     |
| 3.96E-124  | 1.418005135 | 0.443 | 0.053 | 1.27E-119   | 18 CFH       |
| 1.16E-80   | 1.399505061 | 0.353 | 0.053 | 3.73E-76    | 18 NR2F1     |
| 9.94E-12   | 1.398030874 | 0.552 | 0.476 | 3.19E-07    | 18 ETV6      |
| 1.43E-28   | 1.396859401 | 0.448 | 0.192 | 4.59E-24    | 18 DENND2B   |
| 5.02E-42   | 1.392381207 | 0.433 | 0.13  | 1.61E-37    | 18 SLC9A9    |
| 1.27E-05   | 1.387507983 | 0.567 | 0.576 | 0.408231637 | 18 CRIM1     |
| 2.15E-48   | 1.385571475 | 0.299 | 0.058 | 6.92E-44    | 18 CCN2      |
| 0          | 1.382712516 | 0.289 | 0.008 | 0           | 18 FBLN1     |
| 1.82E-25   | 1.381983714 | 0.711 | 0.51  | 5.85E-21    | 18 AUTS2     |
| 5.70E-15   | 1.373364439 | 0.363 | 0.181 | 1.83E-10    | 18 TENM3     |
| 1.01E-119  | 1.370963279 | 0.274 | 0.022 | 3.26E-115   | 18 GFRA1     |
| 8.74E-47   | 1.369468044 | 0.289 | 0.057 | 2.81E-42    | 18 CHSY3     |
| 2.44E-13   | 1.364147462 | 0.284 | 0.132 | 7.82E-09    | 18 HSPA8     |
| 0          | 1.36027524  | 0.269 | 0.007 | 0           | 18 PRRX1     |
| 3.65E-05   | 1.359029179 | 0.313 | 0.224 | 1           | 18 FGF14     |
| 3.81E-72   | 1.357355635 | 0.632 | 0.181 | 1.22E-67    | 18 LDB2      |
| 4.77E-16   | 1.355365069 | 0.259 | 0.1   | 1.53E-11    | 18 HSPB1     |
| 7.48E-16   | 1.352101901 | 0.373 | 0.19  | 2.40E-11    | 18 ENAH      |
| 6.43E-43   | 1.344225646 | 0.313 | 0.073 | 2.06E-38    | 18 TNXB      |
| 2.34E-50   | 1.339648112 | 0.289 | 0.055 | 7.52E-46    | 18 CYP1B1    |
| 1.51E-28   | 1.337152831 | 0.791 | 0.651 | 4.86E-24    | 18 EHBP1     |
| 1.20E-16   | 1.326645411 | 0.507 | 0.325 | 3.85E-12    | 18 ACTB      |
| 7.32E-21   | 1.323291554 | 0.473 | 0.251 | 2.35E-16    | 18 MYLK      |
| 6.21E-26   | 1.32232005  | 0.303 | 0.096 | 1.99E-21    | 18 XYLT1     |
| 1.20E-11   | 1.322018126 | 0.602 | 0.535 | 3.86E-07    | 18 PPP1R12B  |
| 1.47E-153  | 1.318981184 | 0.294 | 0.02  | 4.71E-149   | 18 ADAMTS2   |
| 1.04E-21   | 1.315991825 | 0.672 | 0.44  | 3.36E-17    | 18 THSD4     |
| 4.55E-20   | 1.308043003 | 0.522 | 0.329 | 1.46E-15    | 18 NR2F2-AS1 |
| 3.45E-29   | 1.307362196 | 0.408 | 0.146 | 1.11E-24    | 18 KLHL29    |
| 2.18E-95   | 1.305874875 | 0.323 | 0.039 | 7.00E-91    | 18 PLA2G4A   |
| 1.18E-19   | 1.302748637 | 0.468 | 0.257 | 3.79E-15    | 18 MTHFD1L   |
| 5.42E-14   | 1.301099326 | 0.259 | 0.111 | 1.74E-09    | 18 VLDLR-AS1 |
| 2.10E-24   | 1.300188231 | 0.308 | 0.101 | 6.74E-20    | 18 CCBE1     |
| 2.06E-55   | 1.288847637 | 0.279 | 0.046 | 6.62E-51    | 18 ADAMTSL2  |
| 4.94E-15   | 1.28753187  | 0.602 | 0.528 | 1.59E-10    | 18 PTEN      |

|            |             |       |       |           |                  |
|------------|-------------|-------|-------|-----------|------------------|
| 2.76E-24   | 1.286292621 | 0.677 | 0.471 | 8.86E-20  | 18 SSBP2         |
| 3.85E-41   | 1.279447629 | 0.836 | 0.565 | 1.24E-36  | 18 DST           |
| 5.50E-24   | 1.278397458 | 0.308 | 0.109 | 1.77E-19  | 18 C12orf60      |
| 2.81E-13   | 1.276436795 | 0.353 | 0.188 | 9.04E-09  | 18 ABI3BP        |
| 6.94E-25   | 1.275859755 | 0.572 | 0.293 | 2.23E-20  | 18 MIR100HG      |
| 2.25E-191  | 1.269606558 | 0.279 | 0.014 | 7.23E-187 | 18 LINC00924     |
| 1.73E-29   | 1.265137204 | 0.378 | 0.132 | 5.54E-25  | 18 SLC24A3       |
| 3.30E-10   | 1.245780678 | 0.284 | 0.145 | 1.06E-05  | 18 PCDH7         |
| 1.06E-26   | 1.245302086 | 0.517 | 0.242 | 3.39E-22  | 18 ZEB1          |
| 4.32E-05   | 1.243961883 | 0.697 | 0.641 | 1         | 18 SLCO5A1       |
| 2.36E-38   | 1.237596583 | 0.274 | 0.061 | 7.57E-34  | 18 CRACD         |
| 2.21E-11   | 1.230598972 | 0.632 | 0.605 | 7.09E-07  | 18 IGFBP7        |
| 2.24E-12   | 1.229479051 | 0.259 | 0.117 | 7.19E-08  | 18 ETS2          |
| 4.56E-16   | 1.228153637 | 0.438 | 0.233 | 1.47E-11  | 18 CLIC4         |
| 9.89E-20   | 1.227702557 | 0.353 | 0.157 | 3.18E-15  | 18 NR2F2         |
| 3.68E-19   | 1.21937026  | 0.607 | 0.422 | 1.18E-14  | 18 ASAP1         |
| 1.24E-11   | 1.218918078 | 0.542 | 0.375 | 4.00E-07  | 18 SAMD4A        |
| 2.41E-28   | 1.213874418 | 0.328 | 0.107 | 7.75E-24  | 18 COL5A2        |
| 2.43E-29   | 1.208717065 | 0.358 | 0.123 | 7.82E-25  | 18 CSRPI         |
| 6.88E-20   | 1.206143794 | 0.512 | 0.262 | 2.21E-15  | 18 ARHGAP10      |
| 3.22E-31   | 1.1995504   | 0.378 | 0.12  | 1.03E-26  | 18 COL6A2        |
| 1.70E-21   | 1.198936929 | 0.652 | 0.433 | 5.47E-17  | 18 VCL           |
| 5.87E-25   | 1.190003067 | 0.657 | 0.389 | 1.89E-20  | 18 RERG          |
| 2.72E-12   | 1.189249843 | 0.542 | 0.426 | 8.72E-08  | 18 DAAM1         |
| 1.16E-34   | 1.188543025 | 0.736 | 0.379 | 3.73E-30  | 18 SOX5          |
| 4.99E-26   | 1.186818948 | 0.274 | 0.081 | 1.60E-21  | 18 COL14A1       |
| 8.05E-42   | 1.182680337 | 0.279 | 0.059 | 2.58E-37  | 18 FSTL1         |
| 2.08E-19   | 1.177533072 | 0.274 | 0.096 | 6.69E-15  | 18 PRICKLE1      |
| 1.55E-28   | 1.173275043 | 0.483 | 0.202 | 4.97E-24  | 18 FIGN          |
| 3.39E-50   | 1.173085496 | 0.303 | 0.058 | 1.09E-45  | 18 ARHGAP15      |
| 7.98E-53   | 1.169473512 | 0.274 | 0.047 | 2.56E-48  | 18 LINC02884     |
| 1.16E-19   | 1.169265822 | 0.667 | 0.511 | 3.72E-15  | 18 UACA          |
| 9.00E-32   | 1.160133754 | 0.328 | 0.093 | 2.89E-27  | 18 MSC-AS1       |
| 1.51E-10   | 1.150424204 | 0.577 | 0.428 | 4.86E-06  | 18 GPC6          |
| 3.68E-15   | 1.14770479  | 0.348 | 0.171 | 1.18E-10  | 18 STON1         |
| 1.01E-63   | 1.147589753 | 0.348 | 0.063 | 3.23E-59  | 18 ANTXR2        |
| 5.31E-61   | 1.14744774  | 0.284 | 0.044 | 1.70E-56  | 18 PDLIM7        |
| 3.71E-21   | 1.146007755 | 0.348 | 0.144 | 1.19E-16  | 18 NEXN          |
| 9.06E-22   | 1.138113425 | 0.687 | 0.536 | 2.91E-17  | 18 DPYD          |
| 2.41E-11   | 1.134741434 | 0.463 | 0.29  | 7.73E-07  | 18 SGIP1         |
| 5.62E-11   | 1.133284886 | 0.522 | 0.4   | 1.81E-06  | 18 CMSS1         |
| 1.21E-11   | 1.12814318  | 0.299 | 0.152 | 3.87E-07  | 18 TMEM131L      |
| 2.19E-94   | 1.125319656 | 0.284 | 0.03  | 7.02E-90  | 18 PDGFRB        |
| 9.23E-54   | 1.12276187  | 0.338 | 0.068 | 2.97E-49  | 18 MICAL2        |
| 6.01E-112  | 1.120859063 | 0.259 | 0.021 | 1.93E-107 | 18 MRC2          |
| 1.10E-94   | 1.117729058 | 0.289 | 0.03  | 3.52E-90  | 18 BOC           |
| 9.70E-13   | 1.114444229 | 0.408 | 0.241 | 3.12E-08  | 18 EVA1C         |
| 4.90E-15   | 1.110283037 | 0.687 | 0.515 | 1.57E-10  | 18 TACC1         |
| 0.00588921 | 1.09635434  | 0.463 | 0.465 | 1         | 18 ZFAND5        |
| 1.35E-09   | 1.093677229 | 0.289 | 0.16  | 4.34E-05  | 18 HSP90AB1      |
| 2.67E-33   | 1.092322958 | 0.333 | 0.097 | 8.58E-29  | 18 STON1-GTF2A11 |

|            |             |       |       |             |                |
|------------|-------------|-------|-------|-------------|----------------|
| 1.95E-22   | 1.092107395 | 0.771 | 0.553 | 6.26E-18    | 18 ZBTB16      |
| 5.45E-09   | 1.087916248 | 0.453 | 0.321 | 0.000175198 | 18 ABCA10      |
| 9.03E-24   | 1.08244655  | 0.313 | 0.106 | 2.90E-19    | 18 CNTN1       |
| 1.71E-07   | 1.079437131 | 0.308 | 0.186 | 0.00548232  | 18 ROBO2       |
| 5.56E-10   | 1.075026378 | 0.527 | 0.444 | 1.78E-05    | 18 MYH10       |
| 1.09E-13   | 1.072088625 | 0.642 | 0.513 | 3.49E-09    | 18 NAV2        |
| 4.85E-16   | 1.069993634 | 0.448 | 0.252 | 1.56E-11    | 18 SNED1       |
| 1.46E-22   | 1.066279778 | 0.368 | 0.152 | 4.67E-18    | 18 SEC24D      |
| 1.45E-37   | 1.060884955 | 0.259 | 0.056 | 4.67E-33    | 18 MATN2       |
| 4.80E-14   | 1.058926412 | 0.358 | 0.185 | 1.54E-09    | 18 AP002518.2  |
| 1.95E-14   | 1.057456381 | 0.299 | 0.134 | 6.25E-10    | 18 JUNB        |
| 5.50E-60   | 1.054295279 | 0.294 | 0.048 | 1.76E-55    | 18 LINC01798   |
| 3.00E-80   | 1.051153494 | 0.264 | 0.03  | 9.63E-76    | 18 LRP1        |
| 5.56E-19   | 1.049882936 | 0.328 | 0.136 | 1.79E-14    | 18 JUND        |
| 4.02E-12   | 1.041574125 | 0.587 | 0.438 | 1.29E-07    | 18 EPS8        |
| 1.56E-18   | 1.039911495 | 0.338 | 0.14  | 5.00E-14    | 18 CAMK1D      |
| 4.56E-18   | 1.035905178 | 0.642 | 0.504 | 1.47E-13    | 18 NBPFL4      |
| 1.18E-51   | 1.034528714 | 0.408 | 0.095 | 3.79E-47    | 18 KCNT2       |
| 2.64E-05   | 1.029363521 | 0.393 | 0.318 | 0.848867353 | 18 ZFP36L1     |
| 3.39E-16   | 1.028774226 | 0.463 | 0.264 | 1.09E-11    | 18 RARB        |
| 6.34E-09   | 1.027768062 | 0.453 | 0.321 | 0.000203579 | 18 DUSP1       |
| 6.79E-22   | 1.020471343 | 0.756 | 0.605 | 2.18E-17    | 18 UTRN        |
| 9.26E-51   | 1.018417076 | 0.313 | 0.06  | 2.97E-46    | 18 FLI1        |
| 3.94E-25   | 1.011870307 | 0.811 | 0.634 | 1.26E-20    | 18 PBX1        |
| 2.36E-30   | 1.010428797 | 0.259 | 0.066 | 7.59E-26    | 18 DAAM2       |
| 1.32E-05   | 1.004450612 | 0.527 | 0.52  | 0.425481686 | 18 HNRNPU      |
| 1.58E-15   | 1.002775678 | 0.299 | 0.13  | 5.08E-11    | 18 BCL6        |
| 2.51E-13   | 1.001543964 | 0.323 | 0.158 | 8.05E-09    | 18 EEPD1       |
| 1.16E-33   | 0.994243472 | 0.264 | 0.061 | 3.72E-29    | 18 PDLIM1      |
| 6.74E-08   | 0.992544167 | 0.383 | 0.271 | 0.002164847 | 18 RAPH1       |
| 1.45E-21   | 0.992297656 | 0.284 | 0.097 | 4.67E-17    | 18 GLI3        |
| 0.00013791 | 0.992203935 | 0.458 | 0.414 | 1           | 18 MIR4435-2HG |
| 2.35E-07   | 0.990339439 | 0.502 | 0.447 | 0.007550965 | 18 COL6A3      |
| 1.85E-15   | 0.988513568 | 0.418 | 0.231 | 5.93E-11    | 18 ZBTB46      |
| 7.46E-18   | 0.983552928 | 0.313 | 0.128 | 2.40E-13    | 18 RNF144A     |
| 1.10E-13   | 0.978073216 | 0.517 | 0.348 | 3.53E-09    | 18 PRSS23      |
| 3.67E-26   | 0.973667214 | 0.333 | 0.107 | 1.18E-21    | 18 SH3RF3      |
| 2.69E-25   | 0.970832672 | 1     | 0.999 | 8.63E-21    | 18 FP671120.7  |
| 3.93E-11   | 0.963164579 | 0.363 | 0.219 | 1.26E-06    | 18 PLAGL1      |
| 1.12E-10   | 0.962157553 | 0.398 | 0.251 | 3.58E-06    | 18 HIVEP3      |
| 7.82E-13   | 0.9589149   | 0.383 | 0.208 | 2.51E-08    | 18 ROR1        |
| 1.22E-08   | 0.956774481 | 0.403 | 0.281 | 0.000391216 | 18 CERS6       |
| 4.94E-26   | 0.955945402 | 0.264 | 0.076 | 1.59E-21    | 18 AC087477.2  |
| 3.05E-09   | 0.94437305  | 0.373 | 0.232 | 9.79E-05    | 18 UST         |
| 6.39E-26   | 0.943771852 | 0.269 | 0.077 | 2.05E-21    | 18 LDLRAD3     |
| 9.31E-15   | 0.93137565  | 0.622 | 0.476 | 2.99E-10    | 18 FCHSD2      |
| 1.42E-08   | 0.930471559 | 0.338 | 0.224 | 0.00045708  | 18 PDE5A       |
| 1.11E-09   | 0.918928658 | 0.323 | 0.185 | 3.57E-05    | 18 IL1R1       |
| 3.90E-10   | 0.918600681 | 0.398 | 0.269 | 1.25E-05    | 18 LONRF1      |
| 2.63E-12   | 0.917581611 | 0.264 | 0.121 | 8.44E-08    | 18 TRIM5       |
| 1.80E-12   | 0.909774449 | 0.632 | 0.513 | 5.77E-08    | 18 ANKRD36C    |

|            |             |       |       |             |                |
|------------|-------------|-------|-------|-------------|----------------|
| 3.29E-30   | 0.909494511 | 0.269 | 0.068 | 1.06E-25    | 18 NUAK1       |
| 1.73E-08   | 0.898508132 | 0.647 | 0.618 | 0.00055616  | 18 RBMS1       |
| 4.30E-11   | 0.895801687 | 0.353 | 0.197 | 1.38E-06    | 18 CENPP       |
| 5.83E-18   | 0.89396509  | 0.294 | 0.115 | 1.87E-13    | 18 SLC16A1-AS1 |
| 7.87E-07   | 0.891114337 | 0.622 | 0.64  | 0.025262627 | 18 TNS3        |
| 2.74E-15   | 0.889225932 | 0.582 | 0.394 | 8.79E-11    | 18 DIAPH2      |
| 3.82E-13   | 0.883647823 | 0.736 | 0.684 | 1.23E-08    | 18 PLXDC2      |
| 1.01E-05   | 0.882114572 | 0.443 | 0.383 | 0.325779952 | 18 PEAK1       |
| 5.29E-10   | 0.878381138 | 0.736 | 0.71  | 1.70E-05    | 18 UBE2E2      |
| 4.84E-10   | 0.876469798 | 0.602 | 0.528 | 1.56E-05    | 18 BMPR2       |
| 3.67E-07   | 0.872677749 | 0.502 | 0.428 | 0.011794063 | 18 MYH9        |
| 0.00038806 | 0.870632715 | 0.423 | 0.385 | 1           | 18 JAK2        |
| 2.39E-23   | 0.87050602  | 0.264 | 0.081 | 7.68E-19    | 18 C2CD2       |
| 3.93E-18   | 0.866804991 | 0.294 | 0.113 | 1.26E-13    | 18 TLE2        |
| 2.44E-15   | 0.864842624 | 0.483 | 0.26  | 7.85E-11    | 18 PSD3        |
| 1.67E-07   | 0.855767001 | 0.294 | 0.179 | 0.005354129 | 18 ADARB1      |
| 0.00015025 | 0.845572152 | 0.428 | 0.396 | 1           | 18 STT3B       |
| 1.28E-09   | 0.843837999 | 0.632 | 0.613 | 4.11E-05    | 18 PDXDC1      |
| 2.45E-08   | 0.843266427 | 0.328 | 0.207 | 0.000787966 | 18 ITGA9       |
| 0.00036044 | 0.836840927 | 0.333 | 0.28  | 1           | 18 STX12       |
| 1.09E-05   | 0.834432605 | 0.468 | 0.406 | 0.349417689 | 18 SSBP3       |
| 7.12E-08   | 0.828973555 | 0.567 | 0.496 | 0.002286686 | 18 SH3D19      |
| 1.57E-08   | 0.827965486 | 0.607 | 0.548 | 0.000505428 | 18 TJP1        |
| 0.00045242 | 0.820387841 | 0.502 | 0.497 | 1           | 18 COL4A4      |
| 8.82E-20   | 0.819254796 | 0.254 | 0.082 | 2.83E-15    | 18 SAMHD1      |
| 5.02E-05   | 0.818114692 | 0.532 | 0.522 | 1           | 18 ROCK1       |
| 3.27E-07   | 0.81790734  | 0.368 | 0.261 | 0.010488471 | 18 TRPC1       |
| 8.87E-09   | 0.807642112 | 0.423 | 0.309 | 0.000284965 | 18 NBPFF9      |
| 0.00137404 | 0.806893661 | 0.537 | 0.541 | 1           | 18 SVIL        |
| 5.61E-05   | 0.801901895 | 0.294 | 0.199 | 1           | 18 SEMA3C      |
| 3.21E-09   | 0.799467522 | 0.557 | 0.421 | 0.000103081 | 18 GHR         |
| 2.33E-05   | 0.796841236 | 0.527 | 0.482 | 0.749273028 | 18 MYO1D       |
| 1.25E-07   | 0.793194894 | 0.532 | 0.451 | 0.004028057 | 18 SMURF1      |
| 2.14E-05   | 0.791744828 | 0.418 | 0.347 | 0.687002739 | 18 PER1        |
| 3.23E-07   | 0.789225981 | 0.642 | 0.577 | 0.010379519 | 18 FOXO3       |
| 1.80E-07   | 0.785478871 | 0.622 | 0.625 | 0.005776782 | 18 AC058822.1  |
| 1.71E-06   | 0.783761809 | 0.552 | 0.512 | 0.055026196 | 18 ARGLU1      |
| 5.14E-05   | 0.776201619 | 0.358 | 0.265 | 1           | 18 LINC01266   |
| 9.63E-23   | 0.770166796 | 0.428 | 0.168 | 3.09E-18    | 18 EYA4        |
| 5.25E-09   | 0.769489842 | 0.308 | 0.177 | 0.00016866  | 18 LTBP3       |
| 2.23E-16   | 0.769247987 | 0.274 | 0.106 | 7.18E-12    | 18 NAV1        |
| 4.00E-09   | 0.768212136 | 0.398 | 0.258 | 0.000128592 | 18 EPAS1       |
| 1.16E-06   | 0.767828859 | 0.279 | 0.175 | 0.037200605 | 18 STAT2       |
| 6.16E-08   | 0.765323166 | 0.264 | 0.149 | 0.001979189 | 18 MFSD1       |
| 1.71E-08   | 0.76418873  | 0.602 | 0.55  | 0.00055011  | 18 ROCK2       |
| 0.00012512 | 0.762107673 | 0.393 | 0.343 | 1           | 18 PARVA       |
| 2.43E-07   | 0.761975333 | 0.378 | 0.271 | 0.007794086 | 18 NBPFF10     |
| 1.50E-18   | 0.757138108 | 0.413 | 0.194 | 4.80E-14    | 18 TCF4        |
| 1.33E-08   | 0.753507286 | 0.358 | 0.227 | 0.000428619 | 18 AC019257.8  |
| 4.67E-07   | 0.751207787 | 0.338 | 0.221 | 0.014994301 | 18 SLCO3A1     |
| 2.64E-06   | 0.747815535 | 0.438 | 0.364 | 0.084789356 | 18 NOTCH2      |

|            |             |       |       |             |                 |
|------------|-------------|-------|-------|-------------|-----------------|
| 2.04E-06   | 0.744711807 | 0.517 | 0.461 | 0.065559508 | 18 NBPFI9       |
| 1.23E-05   | 0.743802594 | 0.318 | 0.224 | 0.395697159 | 18 TXNRD1       |
| 0.00205556 | 0.742622635 | 0.383 | 0.333 | 1           | 18 CREB3L2      |
| 2.51E-07   | 0.741427605 | 0.562 | 0.457 | 0.008075794 | 18 DOCK4        |
| 6.09E-09   | 0.738344134 | 0.597 | 0.525 | 0.000195476 | 18 ANKRD36      |
| 3.07E-12   | 0.737421016 | 0.313 | 0.156 | 9.85E-08    | 18 GRK3         |
| 0.00997836 | 0.731174989 | 0.443 | 0.468 | 1           | 18 UBR1         |
| 9.94E-08   | 0.729701613 | 0.368 | 0.254 | 0.003193462 | 18 NBPFI5       |
| 0.00027133 | 0.724764085 | 0.279 | 0.206 | 1           | 18 PTPRS        |
| 2.26E-05   | 0.723027909 | 0.299 | 0.207 | 0.72532153  | 18 ARPC4-TTLL3  |
| 3.31E-06   | 0.721942386 | 0.473 | 0.401 | 0.106147699 | 18 ACSS3        |
| 8.09E-05   | 0.721193872 | 0.458 | 0.412 | 1           | 18 NBPFI6       |
| 1.66E-13   | 0.713098743 | 0.413 | 0.215 | 5.32E-09    | 18 TCF7L1       |
| 3.45E-06   | 0.712592833 | 0.502 | 0.408 | 0.11091023  | 18 PDZRN3       |
| 1.10E-05   | 0.710721424 | 0.408 | 0.328 | 0.352725261 | 18 PTPN12       |
| 0.00844517 | 0.71023364  | 0.537 | 0.569 | 1           | 18 VMP1         |
| 0.00021888 | 0.70949362  | 0.383 | 0.313 | 1           | 18 CACHD1       |
| 4.24E-06   | 0.705294362 | 0.294 | 0.181 | 0.136293899 | 18 DOK6         |
| 3.77E-10   | 0.703821167 | 0.662 | 0.59  | 1.21E-05    | 18 SPTBN1       |
| 3.25E-05   | 0.697396682 | 0.368 | 0.276 | 1           | 18 GAB2         |
| 2.47E-07   | 0.695903338 | 0.468 | 0.375 | 0.00792215  | 18 PIP4K2A      |
| 1.36E-08   | 0.69449981  | 0.552 | 0.382 | 0.000437555 | 18 BNC2         |
| 3.03E-05   | 0.691686197 | 0.274 | 0.18  | 0.972164411 | 18 ANGPT1       |
| 0.00104685 | 0.690603723 | 0.428 | 0.397 | 1           | 18 CAMSAP2      |
| 0.00014808 | 0.689187478 | 0.294 | 0.22  | 1           | 18 PLD1         |
| 5.06E-06   | 0.687216895 | 0.259 | 0.16  | 0.162484722 | 18 FAT4         |
| 0.00224277 | 0.680115551 | 0.512 | 0.517 | 1           | 18 TANC1        |
| 3.07E-17   | 0.680036092 | 0.289 | 0.112 | 9.86E-13    | 18 GABBR1       |
| 9.74E-05   | 0.67515635  | 0.547 | 0.529 | 1           | 18 SMG6         |
| 5.47E-05   | 0.673097155 | 0.478 | 0.442 | 1           | 18 KIF13A       |
| 0.00335621 | 0.67293309  | 0.279 | 0.216 | 1           | 18 CYTOR        |
| 0.00033999 | 0.67101311  | 0.612 | 0.573 | 1           | 18 CBLB         |
| 0.00133829 | 0.670802228 | 0.647 | 0.687 | 1           | 18 KAZN         |
| 0.00031271 | 0.666805312 | 0.264 | 0.193 | 1           | 18 MYO9B        |
| 0.00696923 | 0.663359057 | 0.507 | 0.523 | 1           | 18 RASAL2       |
| 0.00200522 | 0.663358565 | 0.358 | 0.305 | 1           | 18 TRAF3IP2-AS1 |
| 6.44E-06   | 0.661467629 | 0.308 | 0.211 | 0.20692277  | 18 CYTH3        |
| 0.00021963 | 0.659182337 | 0.393 | 0.341 | 1           | 18 ASPH         |
| 0.00775635 | 0.656939888 | 0.383 | 0.375 | 1           | 18 ITGB1        |
| 1.32E-05   | 0.656819209 | 0.308 | 0.216 | 0.424455335 | 18 HOXA3        |
| 0.00016654 | 0.649419065 | 0.323 | 0.244 | 1           | 18 CEP85L       |
| 0.00637514 | 0.64892157  | 0.308 | 0.272 | 1           | 18 MORF4L2      |
| 1.39E-06   | 0.647985513 | 0.264 | 0.16  | 0.044562567 | 18 GARNL3       |
| 2.54E-06   | 0.641174085 | 0.756 | 0.783 | 0.081539082 | 18 SETBP1       |
| 8.34E-09   | 0.639659824 | 0.711 | 0.696 | 0.000267818 | 18 AKAP13       |
| 7.43E-21   | 0.639591321 | 0.318 | 0.109 | 2.39E-16    | 18 FYN          |
| 8.35E-05   | 0.638612144 | 0.328 | 0.247 | 1           | 18 AC012531.3   |
| 0.00018599 | 0.638573626 | 0.527 | 0.521 | 1           | 18 MYCBP2       |
| 0.00137231 | 0.636172375 | 0.502 | 0.492 | 1           | 18 ACTN4        |
| 1.69E-05   | 0.634708326 | 0.333 | 0.24  | 0.541762694 | 18 ATP11C       |
| 0.00143141 | 0.633108132 | 0.348 | 0.284 | 1           | 18 PCDHGA1      |



|            |             |       |       |             |               |
|------------|-------------|-------|-------|-------------|---------------|
| 0.00022186 | 0.632823678 | 0.443 | 0.365 | 1           | 18 LMCD1-AS1  |
| 4.00E-06   | 0.628332122 | 0.806 | 0.82  | 0.128376522 | 18 FP236383.3 |
| 1.36E-05   | 0.625745998 | 0.522 | 0.466 | 0.436405317 | 18 ANKRD36B   |
| 0.00034764 | 0.625249618 | 0.617 | 0.656 | 1           | 18 HERC1      |
| 2.80E-08   | 0.625221191 | 0.806 | 0.807 | 0.00089891  | 18 AC016831.6 |
| 0.00093467 | 0.623567987 | 0.353 | 0.285 | 1           | 18 PLEKHA2    |
| 0.00810922 | 0.620006143 | 0.323 | 0.283 | 1           | 18 PLSCR1     |
| 0.00106535 | 0.616747755 | 0.532 | 0.548 | 1           | 18 AC093752.1 |
| 3.47E-08   | 0.614742142 | 0.682 | 0.646 | 0.0011137   | 18 TTC28      |
| 0.00032514 | 0.612810332 | 0.274 | 0.203 | 1           | 18 DNAJB4     |
| 4.68E-05   | 0.60633132  | 0.318 | 0.236 | 1           | 18 YEATS2     |
| 0.0001092  | 0.601803108 | 0.308 | 0.224 | 1           | 18 TLE4       |
| 1.82E-06   | 0.599196119 | 0.746 | 0.744 | 0.058537959 | 18 MBNL1      |
| 0.00125409 | 0.596611726 | 0.537 | 0.543 | 1           | 18 STAT3      |
| 4.85E-08   | 0.595334035 | 0.816 | 0.795 | 0.00155819  | 18 RBPMS      |
| 0.00232788 | 0.594502634 | 0.318 | 0.265 | 1           | 18 PLEKHG1    |
| 2.55E-10   | 0.591099222 | 0.781 | 0.732 | 8.18E-06    | 18 STAG1      |
| 0.000801   | 0.588811005 | 0.338 | 0.275 | 1           | 18 MSN        |
| 0.00031816 | 0.58689285  | 0.617 | 0.616 | 1           | 18 FER        |
| 6.54E-13   | 0.58659124  | 0.264 | 0.105 | 2.10E-08    | 18 ABCC9      |
| 0.00092286 | 0.586512701 | 0.632 | 0.638 | 1           | 18 MBNL2      |
| 2.01E-07   | 0.584644788 | 0.677 | 0.637 | 0.006467674 | 18 AKT3       |
| 0.00044824 | 0.583690865 | 0.303 | 0.23  | 1           | 18 FAM106A    |
| 0.00597198 | 0.579457373 | 0.308 | 0.264 | 1           | 18 MLXIP      |
| 0.00903458 | 0.578922763 | 0.274 | 0.227 | 1           | 18 NECTIN2    |
| 0.00209581 | 0.577032013 | 0.294 | 0.23  | 1           | 18 SOBP       |
| 0.00088426 | 0.574827817 | 0.532 | 0.511 | 1           | 18 PPP1CB     |
| 9.47E-07   | 0.567028541 | 0.279 | 0.162 | 0.030398823 | 18 KIRREL1    |
| 0.00045366 | 0.562942956 | 0.592 | 0.633 | 1           | 18 FTO        |
| 1.69E-05   | 0.55808059  | 0.269 | 0.169 | 0.543523113 | 18 DENND2A    |
| 0.00148921 | 0.554210207 | 0.398 | 0.349 | 1           | 18 DSE        |
| 0.00400847 | 0.553385955 | 0.453 | 0.441 | 1           | 18 SP100      |
| 1.19E-05   | 0.552377393 | 0.453 | 0.37  | 0.381808875 | 18 FNBP1      |
| 2.20E-08   | 0.549586801 | 0.791 | 0.711 | 0.000708101 | 18 DLG2       |
| 0.009925   | 0.549357595 | 0.597 | 0.659 | 1           | 18 KMT2E      |
| 3.36E-05   | 0.547893246 | 0.602 | 0.56  | 1           | 18 ARID5B     |
| 0.00524765 | 0.541535414 | 0.438 | 0.405 | 1           | 18 GULP1      |
| 0.00025852 | 0.537681947 | 0.254 | 0.18  | 1           | 18 MPZL1      |
| 0.00078421 | 0.536801868 | 0.289 | 0.221 | 1           | 18 NBPFL20    |
| 0.00181941 | 0.536340199 | 0.294 | 0.23  | 1           | 18 RNF217     |
| 0.00243334 | 0.527214603 | 0.294 | 0.241 | 1           | 18 HNRNPLL    |
| 4.69E-11   | 0.524993605 | 0.423 | 0.239 | 1.51E-06    | 18 ENOX1      |
| 1.34E-06   | 0.524788971 | 0.602 | 0.558 | 0.043051618 | 18 FOXN3      |
| 0.00869251 | 0.524004232 | 0.368 | 0.336 | 1           | 18 SPRED1     |
| 0.00703241 | 0.523670339 | 0.458 | 0.452 | 1           | 18 SPECC1L    |
| 0.00286214 | 0.518181813 | 0.507 | 0.495 | 1           | 18 FERMT2     |
| 5.30E-12   | 0.509681583 | 0.905 | 0.919 | 1.70E-07    | 18 FTX        |
| 7.05E-07   | 0.508527684 | 0.348 | 0.225 | 0.022644754 | 18 MAN1C1     |
| 0.00200478 | 0.505244902 | 0.552 | 0.595 | 1           | 18 ANKRD10    |
| 0.00844111 | 0.498702364 | 0.303 | 0.264 | 1           | 18 DCBLD2     |
| 8.17E-06   | 0.497737197 | 0.373 | 0.256 | 0.262468526 | 18 TGFBR3     |

|            |             |       |       |             |                |
|------------|-------------|-------|-------|-------------|----------------|
| 2.29E-10   | 0.496921796 | 0.985 | 0.987 | 7.36E-06    | 18 FP671120.4  |
| 0.00671377 | 0.470846003 | 0.353 | 0.307 | 1           | 18 NR3C1       |
| 0.00053337 | 0.469645692 | 0.463 | 0.407 | 1           | 18 CAMK2D      |
| 0.00167929 | 0.468222951 | 0.308 | 0.246 | 1           | 18 JAZF1       |
| 1.01E-11   | 0.46585466  | 1     | 0.998 | 3.23E-07    | 18 HFM1        |
| 0.00314752 | 0.45967149  | 0.562 | 0.586 | 1           | 18 SRSF11      |
| 1.35E-07   | 0.458782081 | 0.731 | 0.739 | 0.004327385 | 18 LUC7L3      |
| 3.01E-05   | 0.453972834 | 0.786 | 0.779 | 0.967532304 | 18 FNDC3B      |
| 0.00912035 | 0.448235043 | 0.363 | 0.323 | 1           | 18 PARP14      |
| 4.66E-06   | 0.430569801 | 0.507 | 0.406 | 0.149615805 | 18 FRMD4A      |
| 0.00015089 | 0.420134526 | 0.254 | 0.167 | 1           | 18 SH3KBP1     |
| 0.00863338 | 0.415004457 | 0.532 | 0.566 | 1           | 18 UVRAG       |
| 0.00951231 | 0.405790628 | 0.577 | 0.623 | 1           | 18 TBL1XR1     |
| 1.01E-06   | 0.398531432 | 0.279 | 0.165 | 0.032521854 | 18 SGCD        |
| 0.00017408 | 0.39393928  | 0.741 | 0.79  | 1           | 18 PNISR       |
| 3.99E-12   | 0.384458179 | 0.751 | 0.676 | 1.28E-07    | 18 SYNE1       |
| 0.00062228 | 0.384094064 | 0.796 | 0.814 | 1           | 18 PARD3B      |
| 0.00708205 | 0.371110462 | 0.592 | 0.658 | 1           | 18 UBR5        |
| 0.00019526 | 0.34696539  | 0.731 | 0.758 | 1           | 18 VPS13B      |
| 8.59E-05   | 0.34664947  | 0.816 | 0.833 | 1           | 18 DDX17       |
| 0.00276949 | 0.34506932  | 0.313 | 0.238 | 1           | 18 ANKS1B      |
| 0.00022569 | 0.307647465 | 0.731 | 0.702 | 1           | 18 APBB2       |
| 0.00046013 | 0.300628546 | 0.736 | 0.774 | 1           | 18 ZNF638      |
| 3.23E-07   | 0.294892526 | 0.219 | 0.428 | 0.010389535 | 18 PDK4        |
| 0.00767924 | 0.266588084 | 0.796 | 0.717 | 1           | 18 ADAMTS9-AS2 |
| 1.59E-25   | 0.256193739 | 0.308 | 0.092 | 5.10E-21    | 18 EMCN        |
| 1.26E-106  | 3.371670383 | 0.628 | 0.137 | 4.06E-102   | 19 GRM5        |
| 0          | 3.199410803 | 0.884 | 0.064 | 0           | 19 SATB2       |
| 3.66E-179  | 3.164869622 | 0.618 | 0.084 | 1.18E-174   | 19 LRRC4C      |
| 4.16E-199  | 3.017832423 | 0.915 | 0.185 | 1.34E-194   | 19 FOXP2       |
| 5.09E-172  | 2.838942915 | 0.724 | 0.12  | 1.63E-167   | 19 UNC5D       |
| 1.72E-199  | 2.642224947 | 0.95  | 0.209 | 5.53E-195   | 19 CD200       |
| 8.96E-86   | 2.608372089 | 0.744 | 0.237 | 2.88E-81    | 19 KCNMB2      |
| 1.66E-112  | 2.548330981 | 0.759 | 0.201 | 5.32E-108   | 19 RNF144B     |
| 1.25E-104  | 2.478552851 | 0.663 | 0.162 | 4.01E-100   | 19 MARCHF1     |
| 7.30E-175  | 2.462609717 | 0.889 | 0.17  | 2.34E-170   | 19 BX571818.1  |
| 2.49E-179  | 2.431165379 | 0.819 | 0.151 | 8.01E-175   | 19 PHYHIPL     |
| 1.50E-77   | 2.397672478 | 0.538 | 0.126 | 4.83E-73    | 19 SLIT3       |
| 1.05E-103  | 2.397383604 | 0.573 | 0.111 | 3.37E-99    | 19 KCTD16      |
| 2.38E-201  | 2.293332421 | 0.719 | 0.101 | 7.65E-197   | 19 SLC44A5     |
| 1.07E-76   | 2.212952871 | 0.508 | 0.117 | 3.43E-72    | 19 CNTN5       |
| 2.11E-221  | 2.210937939 | 0.879 | 0.138 | 6.76E-217   | 19 PROM1       |
| 1.19E-207  | 2.19696249  | 0.533 | 0.051 | 3.81E-203   | 19 C8orf34     |
| 1.21E-77   | 2.181371572 | 0.528 | 0.122 | 3.90E-73    | 19 ADGRL3      |
| 1.41E-128  | 2.178962182 | 0.709 | 0.144 | 4.54E-124   | 19 EPHA7       |
| 2.56E-110  | 2.117161971 | 0.839 | 0.258 | 8.22E-106   | 19 TPM1        |
| 1.61E-90   | 2.072787419 | 0.844 | 0.293 | 5.18E-86    | 19 ALDH1A2     |
| 1.48E-79   | 2.065251384 | 0.533 | 0.118 | 4.74E-75    | 19 TSHZ2       |
| 3.12E-112  | 2.064908081 | 0.668 | 0.141 | 1.00E-107   | 19 GBA3        |
| 3.54E-114  | 2.062991093 | 0.879 | 0.288 | 1.14E-109   | 19 CASC15      |
| 1.18E-154  | 2.05096501  | 0.497 | 0.056 | 3.80E-150   | 19 H2AC18      |

|           |             |       |       |           |                 |
|-----------|-------------|-------|-------|-----------|-----------------|
| 3.45E-89  | 2.048532723 | 0.915 | 0.481 | 1.11E-84  | 19 ARHGEF35-AS1 |
| 1.35E-244 | 2.020873918 | 0.693 | 0.073 | 4.32E-240 | 19 AC003984.1   |
| 0         | 2.018889293 | 0.658 | 0.017 | 0         | 19 ABCA13       |
| 3.85E-183 | 1.966565192 | 0.704 | 0.1   | 1.24E-178 | 19 DOCK11       |
| 5.03E-141 | 1.953083248 | 0.693 | 0.123 | 1.62E-136 | 19 H2AC6        |
| 3.29E-88  | 1.928855401 | 0.869 | 0.392 | 1.06E-83  | 19 AC074386.1   |
| 1.39E-95  | 1.917383699 | 0.884 | 0.29  | 4.46E-91  | 19 UGT2B7       |
| 1.86E-95  | 1.901161158 | 0.95  | 0.416 | 5.98E-91  | 19 LINC01320    |
| 1.14E-74  | 1.89566324  | 0.678 | 0.204 | 3.66E-70  | 19 AC004870.4   |
| 9.95E-77  | 1.87816907  | 0.437 | 0.082 | 3.20E-72  | 19 KCNMA1       |
| 3.65E-238 | 1.868653142 | 0.779 | 0.099 | 1.17E-233 | 19 AC092894.1   |
| 1.34E-207 | 1.859569813 | 0.523 | 0.048 | 4.30E-203 | 19 SMAD9        |
| 1.93E-65  | 1.838708388 | 0.583 | 0.17  | 6.20E-61  | 19 SHISA9       |
| 4.11E-89  | 1.834577848 | 0.99  | 0.57  | 1.32E-84  | 19 NEBL         |
| 1.40E-80  | 1.790701608 | 0.99  | 0.664 | 4.48E-76  | 19 PAX8-AS1     |
| 4.16E-129 | 1.771802535 | 0.648 | 0.112 | 1.34E-124 | 19 RHEX         |
| 4.62E-81  | 1.748423097 | 0.894 | 0.397 | 1.48E-76  | 19 STOX2        |
| 1.40E-78  | 1.740518244 | 0.864 | 0.374 | 4.50E-74  | 19 AC004593.2   |
| 1.80E-207 | 1.732248018 | 0.683 | 0.084 | 5.77E-203 | 19 SEL1L3       |
| 7.39E-67  | 1.71764621  | 0.905 | 0.448 | 2.37E-62  | 19 GALNT14      |
| 1.91E-68  | 1.701331757 | 0.92  | 0.547 | 6.13E-64  | 19 DAPK1        |
| 1.77E-41  | 1.696778001 | 0.874 | 0.541 | 5.68E-37  | 19 PCAT1        |
| 2.14E-80  | 1.6785658   | 0.794 | 0.299 | 6.86E-76  | 19 DYNC2LI1     |
| 7.43E-77  | 1.676156341 | 1     | 0.739 | 2.39E-72  | 19 OXR1         |
| 2.00E-87  | 1.669239398 | 0.995 | 0.782 | 6.42E-83  | 19 MYO9A        |
| 2.08E-96  | 1.66273708  | 0.799 | 0.23  | 6.67E-92  | 19 CLIC4        |
| 9.83E-60  | 1.625531469 | 0.965 | 0.794 | 3.16E-55  | 19 RBPMS        |
| 3.17E-62  | 1.586968176 | 0.849 | 0.409 | 1.02E-57  | 19 ASTN2        |
| 2.11E-113 | 1.580247681 | 0.543 | 0.09  | 6.77E-109 | 19 EDIL3        |
| 8.10E-82  | 1.56070598  | 0.749 | 0.243 | 2.60E-77  | 19 CPVL         |
| 5.78E-90  | 1.559077781 | 0.693 | 0.183 | 1.86E-85  | 19 DNAH11       |
| 2.43E-67  | 1.558141244 | 0.95  | 0.537 | 7.80E-63  | 19 PPFIBP1      |
| 4.38E-63  | 1.549576776 | 0.724 | 0.276 | 1.41E-58  | 19 EVC          |
| 7.11E-56  | 1.543422199 | 0.724 | 0.298 | 2.28E-51  | 19 PLEKHH2      |
| 2.48E-63  | 1.525756665 | 0.824 | 0.386 | 7.96E-59  | 19 HNF1B        |
| 2.51E-58  | 1.524864964 | 0.819 | 0.399 | 8.05E-54  | 19 PPM1H        |
| 1.12E-38  | 1.522369073 | 0.492 | 0.168 | 3.59E-34  | 19 RGS6         |
| 9.03E-77  | 1.509402494 | 1     | 0.83  | 2.90E-72  | 19 BICC1        |
| 1.26E-66  | 1.50738991  | 0.884 | 0.394 | 4.06E-62  | 19 CNTN4        |
| 8.95E-65  | 1.503100308 | 0.472 | 0.113 | 2.88E-60  | 19 SPON1        |
| 1.85E-76  | 1.498814395 | 0.734 | 0.246 | 5.94E-72  | 19 TPTE2P6      |
| 1.24E-72  | 1.496128986 | 0.663 | 0.197 | 3.97E-68  | 19 PFKFB3       |
| 2.01E-81  | 1.481815044 | 0.673 | 0.173 | 6.46E-77  | 19 CDH2         |
| 3.47E-290 | 1.481349994 | 0.347 | 0.014 | 1.12E-285 | 19 FUT9         |
| 2.63E-160 | 1.476865435 | 0.548 | 0.067 | 8.46E-156 | 19 PPP1R14C     |
| 5.36E-114 | 1.469641605 | 0.482 | 0.071 | 1.72E-109 | 19 DIAPH3       |
| 9.65E-97  | 1.467744987 | 1     | 0.877 | 3.10E-92  | 19 PKHD1        |
| 4.02E-64  | 1.459464582 | 0.704 | 0.257 | 1.29E-59  | 19 PRRG1        |
| 0         | 1.457092045 | 0.467 | 0.022 | 0         | 19 KLRG2        |
| 1.92E-55  | 1.446194679 | 0.754 | 0.288 | 6.17E-51  | 19 SGIP1        |
| 1.11E-126 | 1.414806773 | 0.362 | 0.036 | 3.57E-122 | 19 H1-0         |

|           |             |       |       |           |               |
|-----------|-------------|-------|-------|-----------|---------------|
| 1.90E-72  | 1.414550015 | 0.543 | 0.137 | 6.09E-68  | 19 SOGA1      |
| 7.69E-89  | 1.401675585 | 0.844 | 0.253 | 2.47E-84  | 19 XIST       |
| 1.09E-60  | 1.392518952 | 0.548 | 0.153 | 3.50E-56  | 19 GPC4       |
| 6.01E-74  | 1.38507012  | 0.558 | 0.139 | 1.93E-69  | 19 HMGA2      |
| 4.85E-33  | 1.37262678  | 0.583 | 0.249 | 1.56E-28  | 19 AC012593.1 |
| 1.50E-51  | 1.358468086 | 0.94  | 0.57  | 4.80E-47  | 19 TBC1D4     |
| 8.18E-28  | 1.354921809 | 0.513 | 0.23  | 2.63E-23  | 19 LNC-LBCS   |
| 1.33E-52  | 1.343970939 | 0.925 | 0.603 | 4.28E-48  | 19 UTRN       |
| 3.17E-52  | 1.333919356 | 0.799 | 0.378 | 1.02E-47  | 19 LRRK2      |
| 6.59E-32  | 1.333632595 | 0.658 | 0.351 | 2.12E-27  | 19 PDXK       |
| 7.48E-52  | 1.32648717  | 0.472 | 0.128 | 2.40E-47  | 19 MGC27382   |
| 1.23E-54  | 1.31409058  | 0.538 | 0.165 | 3.97E-50  | 19 H3-3B      |
| 1.64E-55  | 1.311672372 | 0.618 | 0.201 | 5.26E-51  | 19 FIGN       |
| 5.25E-54  | 1.303986924 | 0.874 | 0.429 | 1.69E-49  | 19 COL4A2     |
| 1.94E-48  | 1.298322764 | 0.799 | 0.423 | 6.22E-44  | 19 MAP3K1     |
| 3.49E-148 | 1.287562019 | 0.523 | 0.064 | 1.12E-143 | 19 ID1        |
| 1.38E-37  | 1.27720364  | 0.588 | 0.256 | 4.44E-33  | 19 LPIN1      |
| 1.14E-61  | 1.27532429  | 0.809 | 0.319 | 3.67E-57  | 19 MACC1      |
| 3.09E-43  | 1.274104526 | 0.804 | 0.434 | 9.94E-39  | 19 EGFR       |
| 9.16E-32  | 1.258991711 | 0.382 | 0.122 | 2.94E-27  | 19 AC018467.1 |
| 9.37E-82  | 1.258916323 | 0.417 | 0.071 | 3.01E-77  | 19 LINC02649  |
| 2.04E-44  | 1.256981391 | 0.729 | 0.324 | 6.54E-40  | 19 COL4A1     |
| 2.26E-69  | 1.254787495 | 0.613 | 0.164 | 7.25E-65  | 19 AL136234.1 |
| 3.18E-27  | 1.25062028  | 0.457 | 0.191 | 1.02E-22  | 19 AP000787.1 |
| 6.64E-35  | 1.249302704 | 0.573 | 0.243 | 2.13E-30  | 19 NPR3       |
| 8.31E-67  | 1.245428333 | 0.965 | 0.744 | 2.67E-62  | 19 WDFY3      |
| 4.27E-79  | 1.240635454 | 0.553 | 0.121 | 1.37E-74  | 19 CRYAB      |
| 2.89E-73  | 1.240327711 | 0.533 | 0.126 | 9.27E-69  | 19 AC005162.2 |
| 1.52E-95  | 1.237640428 | 0.523 | 0.093 | 4.87E-91  | 19 TMEM163    |
| 1.59E-99  | 1.234794272 | 0.442 | 0.067 | 5.11E-95  | 19 COL26A1    |
| 4.38E-239 | 1.234396028 | 0.347 | 0.017 | 1.41E-234 | 19 ASIC5      |
| 3.08E-41  | 1.230635118 | 0.874 | 0.546 | 9.90E-37  | 19 BCL2       |
| 2.71E-49  | 1.228613059 | 0.975 | 0.772 | 8.71E-45  | 19 FARP1      |
| 4.99E-55  | 1.224257588 | 0.613 | 0.205 | 1.60E-50  | 19 TPK1       |
| 0         | 1.215900744 | 0.407 | 0.017 | 0         | 19 CPE        |
| 8.32E-91  | 1.208792204 | 0.452 | 0.077 | 2.67E-86  | 19 GREB1L     |
| 2.86E-43  | 1.199959791 | 0.332 | 0.075 | 9.18E-39  | 19 XKR4       |
| 1.83E-56  | 1.198316781 | 0.508 | 0.144 | 5.86E-52  | 19 LINC00240  |
| 3.02E-55  | 1.197389527 | 0.744 | 0.302 | 9.70E-51  | 19 ZNF462     |
| 2.50E-98  | 1.196928824 | 0.608 | 0.128 | 8.03E-94  | 19 CDKL2      |
| 1.02E-47  | 1.196411071 | 0.372 | 0.087 | 3.28E-43  | 19 SLC35F3    |
| 7.73E-37  | 1.19403614  | 0.553 | 0.219 | 2.48E-32  | 19 EML6       |
| 2.13E-36  | 1.189217487 | 0.824 | 0.519 | 6.85E-32  | 19 ADAM10     |
| 2.40E-55  | 1.184991856 | 0.683 | 0.263 | 7.72E-51  | 19 HYDIN      |
| 1.54E-61  | 1.184037764 | 0.578 | 0.166 | 4.93E-57  | 19 JAG1       |
| 1.10E-50  | 1.181326736 | 0.884 | 0.523 | 3.55E-46  | 19 PAX8       |
| 4.42E-109 | 1.177357322 | 0.492 | 0.074 | 1.42E-104 | 19 RIPOR2     |
| 2.04E-52  | 1.174213054 | 0.281 | 0.049 | 6.54E-48  | 19 MTUS2      |
| 2.46E-40  | 1.170237644 | 0.779 | 0.375 | 7.89E-36  | 19 ITGB8      |
| 3.70E-20  | 1.154585887 | 0.523 | 0.274 | 1.19E-15  | 19 NRG1       |
| 7.03E-171 | 1.148659054 | 0.317 | 0.02  | 2.26E-166 | 19 H2AC19     |

|           |             |       |       |           |                |
|-----------|-------------|-------|-------|-----------|----------------|
| 3.52E-37  | 1.147006139 | 0.839 | 0.513 | 1.13E-32  | 19 GMDS        |
| 5.73E-21  | 1.139874547 | 0.518 | 0.255 | 1.84E-16  | 19 CHL1        |
| 8.92E-48  | 1.138722816 | 0.764 | 0.353 | 2.87E-43  | 19 ADGRA3      |
| 2.36E-31  | 1.138312329 | 0.849 | 0.599 | 7.59E-27  | 19 ADAMTS9     |
| 1.39E-43  | 1.137212712 | 0.809 | 0.446 | 4.47E-39  | 19 CDR2        |
| 5.33E-51  | 1.136169426 | 0.95  | 0.588 | 1.71E-46  | 19 MIR99AHG    |
| 3.27E-164 | 1.134167657 | 0.302 | 0.019 | 1.05E-159 | 19 BCAS1       |
| 5.55E-33  | 1.134047031 | 0.714 | 0.363 | 1.78E-28  | 19 NTN4        |
| 2.19E-51  | 1.132730479 | 0.864 | 0.392 | 7.03E-47  | 19 ZDHC14      |
| 1.00E-26  | 1.127968117 | 0.261 | 0.072 | 3.22E-22  | 19 PTPRT       |
| 5.66E-36  | 1.127118624 | 0.824 | 0.481 | 1.82E-31  | 19 GALNT18     |
| 3.81E-54  | 1.11660225  | 0.995 | 0.885 | 1.22E-49  | 19 IMP2L       |
| 5.11E-110 | 1.112846838 | 0.352 | 0.039 | 1.64E-105 | 19 NOL4        |
| 8.12E-55  | 1.111339174 | 0.598 | 0.202 | 2.61E-50  | 19 LBR         |
| 3.24E-41  | 1.098148254 | 0.779 | 0.373 | 1.04E-36  | 19 ARHGAP26    |
| 4.21E-38  | 1.098136169 | 0.709 | 0.364 | 1.35E-33  | 19 GRHL2       |
| 6.29E-49  | 1.094190178 | 0.332 | 0.071 | 2.02E-44  | 19 TMEM132D    |
| 1.54E-20  | 1.08690444  | 0.824 | 0.615 | 4.94E-16  | 19 MRPS6       |
| 1.88E-31  | 1.081731159 | 0.613 | 0.267 | 6.03E-27  | 19 PRUNE2      |
| 1.43E-27  | 1.074991008 | 0.894 | 0.658 | 4.60E-23  | 19 HIPK2       |
| 3.78E-76  | 1.068490184 | 0.422 | 0.076 | 1.21E-71  | 19 DCLK1       |
| 2.78E-31  | 1.067221407 | 0.794 | 0.43  | 8.92E-27  | 19 NLGN1       |
| 5.63E-22  | 1.05781286  | 0.643 | 0.389 | 1.81E-17  | 19 AL589935.1  |
| 7.46E-51  | 1.054641585 | 0.518 | 0.152 | 2.40E-46  | 19 MCTP2       |
| 5.47E-53  | 1.053437134 | 0.744 | 0.277 | 1.76E-48  | 19 PDZK1       |
| 5.13E-47  | 1.047668768 | 0.99  | 0.796 | 1.65E-42  | 19 MAML2       |
| 3.62E-38  | 1.042995599 | 0.508 | 0.186 | 1.16E-33  | 19 NEDD9       |
| 7.78E-39  | 1.039415607 | 0.894 | 0.586 | 2.50E-34  | 19 TRHDE       |
| 8.50E-45  | 1.036758565 | 0.417 | 0.113 | 2.73E-40  | 19 GABRA2      |
| 6.02E-41  | 1.032979784 | 0.603 | 0.247 | 1.93E-36  | 19 AIF1L       |
| 1.15E-165 | 1.032675599 | 0.397 | 0.033 | 3.69E-161 | 19 H2BC5       |
| 2.00E-33  | 1.023404412 | 0.764 | 0.417 | 6.44E-29  | 19 LHFPL3      |
| 6.23E-109 | 1.022136087 | 0.261 | 0.022 | 2.00E-104 | 19 EDIL3-DT    |
| 1.55E-35  | 1.020451091 | 0.523 | 0.202 | 4.99E-31  | 19 CRMP1       |
| 1.86E-44  | 1.019621275 | 0.693 | 0.277 | 5.97E-40  | 19 CTTNBP2     |
| 1.01E-43  | 1.017130306 | 0.568 | 0.195 | 3.26E-39  | 19 SDC2        |
| 1.02E-34  | 1.008953319 | 0.945 | 0.716 | 3.26E-30  | 19 ADAMTS9-AS2 |
| 8.65E-38  | 1.006157928 | 0.814 | 0.433 | 2.78E-33  | 19 OSBPL10     |
| 5.55E-218 | 1.003825767 | 0.342 | 0.018 | 1.78E-213 | 19 H1-2        |
| 3.17E-24  | 0.999888153 | 0.704 | 0.449 | 1.02E-19  | 19 MTMR10      |
| 1.81E-43  | 0.993291599 | 0.583 | 0.207 | 5.81E-39  | 19 PRKCQ       |
| 9.34E-27  | 0.989138794 | 0.467 | 0.187 | 3.00E-22  | 19 ABI3BP      |
| 4.26E-42  | 0.986440145 | 0.487 | 0.156 | 1.37E-37  | 19 AC004540.1  |
| 9.49E-42  | 0.983225755 | 0.869 | 0.508 | 3.05E-37  | 19 PIK3CB      |
| 1.47E-09  | 0.979054389 | 0.482 | 0.323 | 4.72E-05  | 19 NRP1        |
| 4.73E-153 | 0.977207334 | 0.302 | 0.021 | 1.52E-148 | 19 ATOH8       |
| 1.31E-35  | 0.967651073 | 0.573 | 0.219 | 4.22E-31  | 19 SLCO3A1     |
| 3.43E-37  | 0.963845779 | 0.422 | 0.126 | 1.10E-32  | 19 SIM2        |
| 8.99E-229 | 0.957710216 | 0.417 | 0.027 | 2.89E-224 | 19 CRNDE       |
| 1.24E-40  | 0.95285485  | 1     | 0.876 | 3.98E-36  | 19 AL136164.2  |
| 8.17E-38  | 0.949926887 | 0.412 | 0.119 | 2.62E-33  | 19 ALPK2       |

|           |             |       |       |           |                |
|-----------|-------------|-------|-------|-----------|----------------|
| 9.00E-30  | 0.942072264 | 0.839 | 0.517 | 2.89E-25  | 19 NFIA        |
| 1.86E-31  | 0.940010803 | 0.462 | 0.17  | 5.96E-27  | 19 LRRIQ1      |
| 2.54E-67  | 0.938320803 | 0.392 | 0.072 | 8.15E-63  | 19 TNFRSF11B   |
| 9.82E-24  | 0.936386317 | 0.417 | 0.162 | 3.15E-19  | 19 UNC13C      |
| 3.50E-36  | 0.934279792 | 0.603 | 0.252 | 1.12E-31  | 19 AC018730.1  |
| 1.29E-33  | 0.932047118 | 0.327 | 0.088 | 4.14E-29  | 19 EYA1        |
| 2.13E-44  | 0.92646829  | 0.523 | 0.171 | 6.85E-40  | 19 LHFPL3-AS2  |
| 3.69E-45  | 0.923817955 | 0.648 | 0.25  | 1.18E-40  | 19 AC006994.1  |
| 7.36E-51  | 0.914025759 | 0.467 | 0.122 | 2.36E-46  | 19 TNFAIP8     |
| 1.59E-58  | 0.913595764 | 0.518 | 0.137 | 5.10E-54  | 19 AC025171.1  |
| 1.35E-54  | 0.912349196 | 0.457 | 0.113 | 4.32E-50  | 19 SMAD6       |
| 7.69E-125 | 0.911937782 | 0.357 | 0.035 | 2.47E-120 | 19 H1-4        |
| 1.68E-22  | 0.908734771 | 0.769 | 0.49  | 5.40E-18  | 19 RALGPS2     |
| 1.62E-33  | 0.908254437 | 0.864 | 0.585 | 5.20E-29  | 19 WWC1        |
| 6.30E-43  | 0.896912842 | 0.392 | 0.103 | 2.02E-38  | 19 EHF         |
| 0         | 0.89136971  | 0.276 | 0.004 | 0         | 19 H1-3        |
| 1.26E-52  | 0.891121681 | 0.276 | 0.047 | 4.03E-48  | 19 COLEC10     |
| 6.59E-36  | 0.890803469 | 0.824 | 0.423 | 2.12E-31  | 19 STK32B      |
| 5.36E-21  | 0.890115213 | 0.327 | 0.116 | 1.72E-16  | 19 LINC01435   |
| 7.22E-45  | 0.88526141  | 0.422 | 0.115 | 2.32E-40  | 19 ASRGL1      |
| 6.38E-41  | 0.883181975 | 0.849 | 0.463 | 2.05E-36  | 19 KIF12       |
| 5.91E-20  | 0.873336913 | 0.588 | 0.34  | 1.90E-15  | 19 SPTLC2      |
| 1.66E-28  | 0.872070713 | 0.698 | 0.388 | 5.33E-24  | 19 UBAP2       |
| 3.43E-38  | 0.86543741  | 0.477 | 0.161 | 1.10E-33  | 19 CFAP43      |
| 4.70E-65  | 0.86358456  | 0.276 | 0.039 | 1.51E-60  | 19 ID3         |
| 4.69E-21  | 0.86114856  | 0.598 | 0.321 | 1.51E-16  | 19 FGFR2       |
| 1.11E-42  | 0.859279245 | 0.407 | 0.11  | 3.55E-38  | 19 SPNS2       |
| 4.37E-120 | 0.857596705 | 0.296 | 0.025 | 1.40E-115 | 19 ID4         |
| 1.16E-31  | 0.850596428 | 0.704 | 0.338 | 3.73E-27  | 19 FREM2       |
| 2.07E-39  | 0.848300034 | 0.553 | 0.183 | 6.64E-35  | 19 FBXL7       |
| 8.36E-41  | 0.848014325 | 0.739 | 0.316 | 2.68E-36  | 19 ABCC4       |
| 4.15E-29  | 0.84561877  | 0.563 | 0.246 | 1.33E-24  | 19 ADAMTS9-AS1 |
| 5.54E-121 | 0.845506801 | 0.327 | 0.03  | 1.78E-116 | 19 BOC         |
| 1.90E-26  | 0.844068988 | 0.437 | 0.172 | 6.12E-22  | 19 AP1S3       |
| 6.70E-88  | 0.843536559 | 0.281 | 0.031 | 2.15E-83  | 19 ODC1        |
| 3.46E-55  | 0.843089367 | 0.281 | 0.046 | 1.11E-50  | 19 AC007906.2  |
| 2.83E-38  | 0.842953928 | 0.518 | 0.184 | 9.09E-34  | 19 AC011447.3  |
| 1.07E-28  | 0.841235054 | 0.905 | 0.714 | 3.43E-24  | 19 CDKAL1      |
| 2.88E-26  | 0.840513149 | 0.94  | 0.74  | 9.24E-22  | 19 NFAT5       |
| 1.62E-19  | 0.840221078 | 0.819 | 0.606 | 5.20E-15  | 19 TBL1X       |
| 1.81E-28  | 0.83946283  | 0.322 | 0.095 | 5.82E-24  | 19 UGT2A3      |
| 1.01E-35  | 0.832671239 | 0.714 | 0.331 | 3.24E-31  | 19 ANKRD44     |
| 4.51E-43  | 0.832109609 | 0.995 | 0.838 | 1.45E-38  | 19 PARD3       |
| 7.49E-21  | 0.829482694 | 0.744 | 0.465 | 2.40E-16  | 19 RFX3-AS1    |
| 2.12E-18  | 0.828501227 | 0.648 | 0.395 | 6.80E-14  | 19 DNMT3       |
| 5.22E-27  | 0.826974211 | 0.874 | 0.63  | 1.68E-22  | 19 FTO         |
| 9.58E-32  | 0.818268308 | 0.688 | 0.344 | 3.08E-27  | 19 SEMA4D      |
| 4.37E-21  | 0.813005218 | 0.678 | 0.405 | 1.40E-16  | 19 LINC00271   |
| 2.71E-28  | 0.812133596 | 0.91  | 0.561 | 8.70E-24  | 19 P3H2        |
| 1.30E-57  | 0.808093928 | 0.286 | 0.046 | 4.19E-53  | 19 AC111000.4  |
| 7.55E-30  | 0.802890545 | 0.518 | 0.214 | 2.42E-25  | 19 HYDIN2      |

|           |             |       |       |           |                 |
|-----------|-------------|-------|-------|-----------|-----------------|
| 3.00E-17  | 0.800214719 | 0.709 | 0.512 | 9.64E-13  | 19 CFDP1        |
| 4.33E-28  | 0.79817536  | 0.668 | 0.356 | 1.39E-23  | 19 PRKCI        |
| 1.36E-25  | 0.794621383 | 0.709 | 0.41  | 4.38E-21  | 19 GPCPD1       |
| 1.04E-30  | 0.791288394 | 0.377 | 0.117 | 3.33E-26  | 19 ITGB3        |
| 4.03E-29  | 0.790382236 | 0.543 | 0.233 | 1.30E-24  | 19 TBC1D16      |
| 1.08E-22  | 0.789560753 | 0.538 | 0.254 | 3.46E-18  | 19 DCDC1        |
| 4.89E-32  | 0.788853605 | 0.513 | 0.202 | 1.57E-27  | 19 IFT122       |
| 4.51E-24  | 0.786150476 | 0.729 | 0.427 | 1.45E-19  | 19 SKAP2        |
| 4.78E-48  | 0.783850877 | 0.377 | 0.09  | 1.53E-43  | 19 PARP4        |
| 2.52E-32  | 0.781845311 | 0.307 | 0.084 | 8.10E-28  | 19 SESN3        |
| 3.01E-41  | 0.777836912 | 0.392 | 0.106 | 9.67E-37  | 19 JHY          |
| 4.94E-23  | 0.777801464 | 0.467 | 0.202 | 1.59E-18  | 19 AQP4-AS1     |
| 7.51E-137 | 0.776424962 | 0.307 | 0.024 | 2.41E-132 | 19 H2BC21       |
| 4.43E-15  | 0.774746483 | 0.362 | 0.167 | 1.42E-10  | 19 U91319.1     |
| 6.45E-23  | 0.771407911 | 0.508 | 0.236 | 2.07E-18  | 19 DNAI4        |
| 3.48E-24  | 0.770484532 | 0.749 | 0.44  | 1.12E-19  | 19 SASH1        |
| 5.61E-16  | 0.768717174 | 0.347 | 0.154 | 1.80E-11  | 19 NUAK2        |
| 3.00E-26  | 0.767042711 | 0.588 | 0.297 | 9.64E-22  | 19 BIVM         |
| 1.28E-23  | 0.765063602 | 0.402 | 0.157 | 4.11E-19  | 19 LPCAT2       |
| 5.06E-27  | 0.764144272 | 0.447 | 0.167 | 1.63E-22  | 19 DENND2A      |
| 1.55E-19  | 0.762434677 | 0.709 | 0.475 | 4.99E-15  | 19 SLC35F5      |
| 5.78E-58  | 0.761747994 | 0.296 | 0.048 | 1.86E-53  | 19 HRH1         |
| 1.03E-117 | 0.76147356  | 0.276 | 0.023 | 3.32E-113 | 19 ATP13A4      |
| 2.92E-20  | 0.760666142 | 0.814 | 0.567 | 9.37E-16  | 19 LARGE1       |
| 6.06E-24  | 0.757519295 | 0.839 | 0.599 | 1.95E-19  | 19 TUT4         |
| 1.67E-20  | 0.756610511 | 0.734 | 0.443 | 5.37E-16  | 19 SUGCT        |
| 4.12E-52  | 0.755849595 | 0.472 | 0.127 | 1.32E-47  | 19 OR2A20P      |
| 9.03E-24  | 0.755403263 | 0.879 | 0.606 | 2.90E-19  | 19 CCDC198      |
| 3.98E-20  | 0.754306947 | 0.538 | 0.265 | 1.28E-15  | 19 SCD5         |
| 4.99E-25  | 0.753986644 | 0.698 | 0.378 | 1.60E-20  | 19 FRMD4B       |
| 1.30E-18  | 0.753848912 | 0.693 | 0.453 | 4.18E-14  | 19 FOCAD        |
| 3.26E-25  | 0.752150882 | 0.839 | 0.533 | 1.05E-20  | 19 PLCXD2       |
| 1.71E-116 | 0.751372594 | 0.266 | 0.021 | 5.50E-112 | 19 MRC2         |
| 4.45E-17  | 0.743993901 | 0.698 | 0.494 | 1.43E-12  | 19 ATXN10       |
| 3.30E-32  | 0.742764937 | 0.332 | 0.089 | 1.06E-27  | 19 MIR31HG      |
| 7.88E-73  | 0.741637942 | 0.266 | 0.033 | 2.53E-68  | 19 H2BC18       |
| 3.20E-25  | 0.74110727  | 0.965 | 0.804 | 1.03E-20  | 19 EXOC4        |
| 7.53E-34  | 0.73964455  | 0.367 | 0.108 | 2.42E-29  | 19 UBTD1        |
| 9.57E-32  | 0.738601887 | 0.492 | 0.19  | 3.07E-27  | 19 TMEM38B      |
| 7.64E-24  | 0.737806    | 0.613 | 0.318 | 2.45E-19  | 19 MGAT4A       |
| 1.30E-44  | 0.736932883 | 0.271 | 0.052 | 4.18E-40  | 19 AC136759.1   |
| 6.69E-34  | 0.735329538 | 0.417 | 0.132 | 2.15E-29  | 19 FLVCR2       |
| 3.38E-18  | 0.735030698 | 0.854 | 0.627 | 1.09E-13  | 19 LINC02532    |
| 4.84E-17  | 0.734201246 | 0.693 | 0.456 | 1.55E-12  | 19 BMPR1A       |
| 4.60E-20  | 0.727256307 | 0.678 | 0.428 | 1.48E-15  | 19 TVP23C-CDRT4 |
| 3.10E-16  | 0.721411809 | 0.296 | 0.117 | 9.95E-12  | 19 AL355499.1   |
| 8.99E-27  | 0.718682895 | 0.894 | 0.637 | 2.89E-22  | 19 TNS3         |
| 1.47E-36  | 0.71802125  | 0.387 | 0.114 | 4.72E-32  | 19 CLDN18       |
| 4.85E-12  | 0.717543175 | 0.281 | 0.129 | 1.56E-07  | 19 AC007161.3   |
| 3.65E-24  | 0.716611938 | 0.583 | 0.291 | 1.17E-19  | 19 AHNAK        |
| 1.04E-23  | 0.71621199  | 0.824 | 0.504 | 3.34E-19  | 19 DSCAML1      |

|           |             |       |       |             |               |
|-----------|-------------|-------|-------|-------------|---------------|
| 2.17E-18  | 0.716135243 | 0.809 | 0.573 | 6.96E-14    | 19 MTSS1      |
| 1.36E-39  | 0.716034536 | 0.251 | 0.05  | 4.38E-35    | 19 PCAT14     |
| 3.29E-37  | 0.715219949 | 0.407 | 0.123 | 1.06E-32    | 19 NIPAL3     |
| 2.50E-107 | 0.712841368 | 0.332 | 0.035 | 8.03E-103   | 19 FGFBP2     |
| 1.31E-21  | 0.704639229 | 0.834 | 0.596 | 4.19E-17    | 19 WWC2       |
| 1.22E-16  | 0.70117885  | 0.568 | 0.332 | 3.91E-12    | 19 AC046134.2 |
| 3.37E-21  | 0.700668323 | 0.568 | 0.297 | 1.08E-16    | 19 WRN        |
| 4.05E-06  | 0.700146614 | 0.337 | 0.215 | 0.129971355 | 19 RMST       |
| 6.67E-32  | 0.700038668 | 0.412 | 0.139 | 2.14E-27    | 19 ACADL      |
| 3.03E-37  | 0.699815705 | 0.412 | 0.125 | 9.75E-33    | 19 DZIP1L     |
| 1.19E-19  | 0.69599053  | 0.256 | 0.082 | 3.82E-15    | 19 COL19A1    |
| 2.05E-20  | 0.692968489 | 0.548 | 0.268 | 6.59E-16    | 19 PANTR1     |
| 6.25E-17  | 0.692873922 | 0.427 | 0.206 | 2.01E-12    | 19 LEKR1      |
| 2.23E-20  | 0.688285141 | 0.618 | 0.32  | 7.17E-16    | 19 FAM110B    |
| 4.56E-19  | 0.687405709 | 0.402 | 0.181 | 1.46E-14    | 19 MTHFD1     |
| 2.25E-19  | 0.686584264 | 0.749 | 0.516 | 7.24E-15    | 19 XPO1       |
| 5.78E-48  | 0.685258302 | 0.291 | 0.054 | 1.86E-43    | 19 AKR1C1     |
| 2.95E-26  | 0.68264477  | 0.427 | 0.158 | 9.48E-22    | 19 FAT4       |
| 1.17E-12  | 0.681951514 | 0.417 | 0.231 | 3.75E-08    | 19 CNIH3      |
| 2.65E-22  | 0.681467812 | 0.477 | 0.214 | 8.51E-18    | 19 HOXA3      |
| 3.24E-19  | 0.680115468 | 0.879 | 0.675 | 1.04E-14    | 19 PLEKHA7    |
| 1.83E-23  | 0.678808444 | 0.673 | 0.353 | 5.87E-19    | 19 SLC1A1     |
| 1.59E-14  | 0.678561576 | 0.578 | 0.351 | 5.10E-10    | 19 AC092944.1 |
| 7.75E-114 | 0.678063168 | 0.256 | 0.02  | 2.49E-109   | 19 SLC4A11    |
| 2.12E-15  | 0.672898761 | 0.729 | 0.527 | 6.82E-11    | 19 LIFR       |
| 5.79E-34  | 0.671294995 | 0.302 | 0.076 | 1.86E-29    | 19 SLC39A8    |
| 8.66E-30  | 0.670960133 | 0.628 | 0.261 | 2.78E-25    | 19 ARHGAP10   |
| 5.44E-22  | 0.670635577 | 0.392 | 0.154 | 1.75E-17    | 19 SLCO4C1    |
| 6.80E-23  | 0.670140656 | 0.839 | 0.554 | 2.18E-18    | 19 ARHGAP29   |
| 4.27E-12  | 0.669561268 | 0.332 | 0.162 | 1.37E-07    | 19 MCTP1      |
| 8.29E-27  | 0.667967823 | 0.397 | 0.138 | 2.66E-22    | 19 GUCY1A1    |
| 3.54E-18  | 0.665682167 | 0.623 | 0.375 | 1.14E-13    | 19 CU633904.1 |
| 2.00E-11  | 0.664911261 | 0.372 | 0.197 | 6.42E-07    | 19 PRANCR     |
| 1.08E-17  | 0.664106186 | 0.91  | 0.73  | 3.46E-13    | 19 SHANK2     |
| 1.44E-15  | 0.660740248 | 0.442 | 0.221 | 4.63E-11    | 19 GNAI1      |
| 2.88E-30  | 0.655201607 | 0.452 | 0.162 | 9.26E-26    | 19 PDZK1P1    |
| 3.38E-25  | 0.654252496 | 0.663 | 0.345 | 1.09E-20    | 19 ITGA1      |
| 4.18E-19  | 0.653764972 | 0.618 | 0.351 | 1.34E-14    | 19 GABPB1-AS1 |
| 6.39E-38  | 0.653562034 | 1     | 0.967 | 2.05E-33    | 19 ZBTB20     |
| 1.28E-18  | 0.653233772 | 0.673 | 0.425 | 4.12E-14    | 19 VPS41      |
| 1.82E-22  | 0.65274607  | 0.648 | 0.361 | 5.84E-18    | 19 LINC01145  |
| 2.93E-28  | 0.652423513 | 0.432 | 0.163 | 9.40E-24    | 19 PLEKHH1    |
| 2.36E-14  | 0.651872552 | 0.327 | 0.146 | 7.59E-10    | 19 DNAJC6     |
| 1.91E-16  | 0.64951034  | 0.749 | 0.517 | 6.14E-12    | 19 KIAA1328   |
| 8.33E-14  | 0.649199723 | 0.362 | 0.18  | 2.68E-09    | 19 LINC02062  |
| 6.22E-128 | 0.648103058 | 0.251 | 0.017 | 2.00E-123   | 19 LECT2      |
| 1.74E-13  | 0.643639926 | 0.487 | 0.289 | 5.57E-09    | 19 USP54      |
| 7.91E-32  | 0.641008428 | 0.377 | 0.113 | 2.54E-27    | 19 ADGRG6     |
| 1.84E-16  | 0.640654468 | 0.633 | 0.395 | 5.91E-12    | 19 PPP3CC     |
| 7.74E-27  | 0.640273405 | 0.417 | 0.153 | 2.49E-22    | 19 CFAP94     |
| 4.12E-20  | 0.639937093 | 0.638 | 0.364 | 1.32E-15    | 19 SYTL2      |



|            |             |       |       |             |               |
|------------|-------------|-------|-------|-------------|---------------|
| 7.21E-16   | 0.638109299 | 0.653 | 0.417 | 2.32E-11    | 19 RNF180     |
| 7.24E-13   | 0.637241819 | 0.739 | 0.528 | 2.32E-08    | 19 PTPN14     |
| 5.19E-16   | 0.637210563 | 0.678 | 0.441 | 1.67E-11    | 19 SEPTIN11   |
| 3.40E-14   | 0.636295513 | 0.462 | 0.268 | 1.09E-09    | 19 LEPROT     |
| 1.95E-15   | 0.636127333 | 0.688 | 0.455 | 6.25E-11    | 19 ARHGEF10L  |
| 4.16E-10   | 0.635167682 | 0.342 | 0.182 | 1.34E-05    | 19 HLF        |
| 2.73E-12   | 0.634807742 | 0.553 | 0.344 | 8.76E-08    | 19 GLCCII     |
| 6.71E-22   | 0.634558183 | 0.518 | 0.245 | 2.16E-17    | 19 AC012531.3 |
| 5.10E-35   | 0.632202287 | 0.342 | 0.092 | 1.64E-30    | 19 EGOT       |
| 4.84E-18   | 0.632092095 | 0.437 | 0.207 | 1.56E-13    | 19 PECR       |
| 4.89E-13   | 0.630276671 | 0.648 | 0.425 | 1.57E-08    | 19 ENTPD1-AS1 |
| 6.34E-17   | 0.627412397 | 0.598 | 0.347 | 2.04E-12    | 19 MAP3K21    |
| 1.46E-14   | 0.626686637 | 0.457 | 0.241 | 4.69E-10    | 19 AGBL3      |
| 4.39E-35   | 0.626402277 | 0.307 | 0.075 | 1.41E-30    | 19 DPP4       |
| 1.69E-22   | 0.626060972 | 0.538 | 0.262 | 5.42E-18    | 19 ENPP3      |
| 1.40E-23   | 0.622286756 | 0.352 | 0.128 | 4.50E-19    | 19 STX2       |
| 1.09E-19   | 0.621650529 | 0.688 | 0.404 | 3.51E-15    | 19 CAMK2D     |
| 3.12E-21   | 0.621382799 | 0.538 | 0.257 | 1.00E-16    | 19 HNMT       |
| 1.84E-15   | 0.621083757 | 0.673 | 0.424 | 5.90E-11    | 19 BICD1      |
| 1.53E-27   | 0.619758707 | 0.422 | 0.158 | 4.92E-23    | 19 DDX31      |
| 0.00048751 | 0.618639358 | 0.613 | 0.511 | 1           | 19 AUTS2      |
| 6.14E-17   | 0.616768976 | 0.266 | 0.096 | 1.97E-12    | 19 MIR3681HG  |
| 1.24E-20   | 0.612967011 | 0.387 | 0.156 | 3.98E-16    | 19 FAM149A    |
| 3.43E-14   | 0.61114545  | 0.588 | 0.398 | 1.10E-09    | 19 PTAR1      |
| 6.62E-25   | 0.611032992 | 0.367 | 0.132 | 2.13E-20    | 19 SEPSECS    |
| 3.45E-32   | 0.609355804 | 0.377 | 0.117 | 1.11E-27    | 19 LINC01948  |
| 1.03E-41   | 0.608356699 | 0.714 | 0.271 | 3.30E-37    | 19 SNTB1      |
| 2.91E-14   | 0.60815502  | 0.482 | 0.266 | 9.34E-10    | 19 CCDC18     |
| 1.20E-15   | 0.607120561 | 0.492 | 0.266 | 3.85E-11    | 19 LINC02615  |
| 1.98E-11   | 0.606190641 | 0.648 | 0.436 | 6.35E-07    | 19 KCNJ3      |
| 4.38E-13   | 0.606106738 | 0.437 | 0.249 | 1.41E-08    | 19 TSEN2      |
| 4.65E-13   | 0.606032288 | 0.563 | 0.355 | 1.49E-08    | 19 STON2      |
| 2.68E-30   | 0.605793747 | 0.779 | 0.379 | 8.62E-26    | 19 FRY        |
| 2.42E-11   | 0.605681371 | 0.392 | 0.214 | 7.78E-07    | 19 C12orf40   |
| 3.61E-12   | 0.600522792 | 0.472 | 0.292 | 1.16E-07    | 19 KATNIP     |
| 1.33E-19   | 0.598104871 | 0.724 | 0.415 | 4.26E-15    | 19 FAM171A1   |
| 1.21E-11   | 0.597000291 | 0.442 | 0.256 | 3.87E-07    | 19 B4GALT1    |
| 1.32E-18   | 0.594709309 | 0.955 | 0.684 | 4.23E-14    | 19 KAZN       |
| 1.69E-21   | 0.593818403 | 0.769 | 0.5   | 5.43E-17    | 19 VPS13C     |
| 6.66E-09   | 0.593661445 | 0.407 | 0.251 | 0.000213773 | 19 ACTG1      |
| 5.33E-17   | 0.592498858 | 0.337 | 0.143 | 1.71E-12    | 19 TMEM267    |
| 4.32E-06   | 0.590901032 | 0.548 | 0.414 | 0.138703219 | 19 AL355499.2 |
| 3.72E-15   | 0.586550295 | 0.628 | 0.403 | 1.20E-10    | 19 BICRAL     |
| 1.43E-11   | 0.584688671 | 0.709 | 0.527 | 4.60E-07    | 19 FANCC      |
| 5.06E-17   | 0.583889976 | 0.543 | 0.295 | 1.63E-12    | 19 FUT8       |
| 1.60E-14   | 0.583628755 | 0.402 | 0.201 | 5.14E-10    | 19 PGAM1P5    |
| 1.25E-20   | 0.583541421 | 0.874 | 0.633 | 4.03E-16    | 19 PBX1       |
| 9.10E-17   | 0.58341425  | 0.688 | 0.446 | 2.92E-12    | 19 PREPL      |
| 8.77E-13   | 0.581560159 | 0.266 | 0.113 | 2.82E-08    | 19 TBXAS1     |
| 1.53E-12   | 0.581293399 | 0.457 | 0.264 | 4.92E-08    | 19 IMPA2      |
| 1.70E-18   | 0.580078983 | 0.628 | 0.356 | 5.47E-14    | 19 PPP1R13B   |

|           |             |       |       |             |               |
|-----------|-------------|-------|-------|-------------|---------------|
| 1.38E-14  | 0.579708432 | 0.563 | 0.34  | 4.44E-10    | 19 ASPH       |
| 7.09E-18  | 0.579074135 | 0.447 | 0.215 | 2.28E-13    | 19 BCAM       |
| 2.71E-19  | 0.578631947 | 0.487 | 0.241 | 8.69E-15    | 19 ADSS2      |
| 6.01E-62  | 0.578510027 | 0.271 | 0.039 | 1.93E-57    | 19 SIRPA      |
| 8.63E-19  | 0.575792519 | 0.457 | 0.218 | 2.77E-14    | 19 PLAGL1     |
| 8.61E-23  | 0.573035887 | 0.337 | 0.119 | 2.77E-18    | 19 SLC12A8    |
| 7.97E-34  | 0.568968611 | 0.251 | 0.055 | 2.56E-29    | 19 CYP1B1     |
| 3.94E-12  | 0.567967232 | 0.693 | 0.498 | 1.26E-07    | 19 CCDC18-AS1 |
| 4.24E-71  | 0.566254287 | 0.251 | 0.03  | 1.36E-66    | 19 CERCAM     |
| 6.20E-13  | 0.564572184 | 0.422 | 0.222 | 1.99E-08    | 19 SPAG17     |
| 6.44E-13  | 0.563695542 | 0.709 | 0.484 | 2.07E-08    | 19 FMNL2      |
| 6.06E-18  | 0.562740735 | 0.357 | 0.153 | 1.95E-13    | 19 OGFRL1     |
| 6.42E-30  | 0.561795382 | 0.312 | 0.089 | 2.06E-25    | 19 FAM47E     |
| 1.77E-17  | 0.561332474 | 0.608 | 0.353 | 5.68E-13    | 19 ATP10D     |
| 6.09E-17  | 0.560110779 | 0.482 | 0.236 | 1.96E-12    | 19 SLC2A13    |
| 1.22E-15  | 0.560032194 | 0.513 | 0.269 | 3.92E-11    | 19 AC008554.1 |
| 1.30E-14  | 0.559497117 | 0.563 | 0.344 | 4.18E-10    | 19 AL592183.1 |
| 1.63E-19  | 0.558699229 | 0.593 | 0.323 | 5.24E-15    | 19 STK38      |
| 4.67E-15  | 0.557966694 | 0.683 | 0.466 | 1.50E-10    | 19 GUSBP2     |
| 4.25E-11  | 0.556376657 | 0.789 | 0.615 | 1.36E-06    | 19 FER        |
| 1.31E-08  | 0.556359408 | 0.533 | 0.349 | 0.000420586 | 19 CADM1      |
| 2.73E-13  | 0.555885788 | 0.327 | 0.148 | 8.77E-09    | 19 TNFSF10    |
| 0.0073002 | 0.55543552  | 0.357 | 0.297 | 1           | 19 GALNT10    |
| 3.48E-10  | 0.552345053 | 0.683 | 0.531 | 1.12E-05    | 19 DHRSX      |
| 1.00E-18  | 0.552256864 | 0.377 | 0.163 | 3.21E-14    | 19 AC011043.1 |
| 1.23E-13  | 0.551444894 | 0.462 | 0.255 | 3.95E-09    | 19 YWHAEP7    |
| 3.45E-12  | 0.550731933 | 0.352 | 0.18  | 1.11E-07    | 19 AC104109.4 |
| 3.17E-13  | 0.548013125 | 0.382 | 0.189 | 1.02E-08    | 19 MPP6       |
| 1.20E-13  | 0.543095618 | 0.397 | 0.204 | 3.87E-09    | 19 RAVR2      |
| 1.65E-12  | 0.542683677 | 0.558 | 0.352 | 5.30E-08    | 19 IFT74      |
| 1.17E-15  | 0.542566055 | 0.513 | 0.286 | 3.75E-11    | 19 MYEF2      |
| 1.17E-15  | 0.541739758 | 0.844 | 0.633 | 3.74E-11    | 19 ARHGEF28   |
| 1.49E-09  | 0.541477348 | 0.462 | 0.296 | 4.80E-05    | 19 YPEL2      |
| 7.94E-09  | 0.541453324 | 0.779 | 0.631 | 0.000255107 | 19 CAMKMT     |
| 5.61E-13  | 0.540081133 | 0.558 | 0.355 | 1.80E-08    | 19 EFCAB6     |
| 2.21E-10  | 0.539032867 | 0.678 | 0.503 | 7.11E-06    | 19 PHF21A     |
| 1.90E-14  | 0.538865121 | 0.276 | 0.111 | 6.09E-10    | 19 UFL1-AS1   |
| 1.97E-16  | 0.537655173 | 0.794 | 0.528 | 6.31E-12    | 19 FRMD3      |
| 8.18E-15  | 0.535673503 | 0.734 | 0.529 | 2.63E-10    | 19 LSM14A     |
| 2.34E-17  | 0.535588774 | 0.271 | 0.097 | 7.53E-13    | 19 MAP3K20    |
| 5.67E-12  | 0.535253642 | 0.422 | 0.24  | 1.82E-07    | 19 ENO4       |
| 3.30E-11  | 0.534210983 | 0.704 | 0.497 | 1.06E-06    | 19 MLLT3      |
| 1.16E-62  | 0.531609047 | 1     | 1     | 3.72E-58    | 19 LINC00486  |
| 2.91E-10  | 0.528008939 | 0.402 | 0.23  | 9.35E-06    | 19 MDFIC      |
| 1.18E-48  | 0.523772481 | 0.281 | 0.05  | 3.79E-44    | 19 OR2A9P     |
| 6.93E-10  | 0.523247064 | 0.618 | 0.435 | 2.22E-05    | 19 AL078459.1 |
| 2.62E-15  | 0.52211796  | 0.869 | 0.679 | 8.41E-11    | 19 ARMH4      |
| 7.71E-15  | 0.519848926 | 0.397 | 0.194 | 2.48E-10    | 19 EPCAM-DT   |
| 5.87E-14  | 0.519636541 | 0.417 | 0.212 | 1.89E-09    | 19 CDS1       |
| 3.73E-10  | 0.518888397 | 0.613 | 0.463 | 1.20E-05    | 19 YTHDC1     |
| 7.70E-13  | 0.516306543 | 0.437 | 0.251 | 2.47E-08    | 19 AC244669.1 |

|          |             |       |       |             |               |
|----------|-------------|-------|-------|-------------|---------------|
| 1.10E-18 | 0.5157885   | 0.754 | 0.472 | 3.54E-14    | 19 EPB41L1    |
| 3.19E-13 | 0.515655208 | 0.548 | 0.34  | 1.02E-08    | 19 LINC00869  |
| 1.14E-10 | 0.515203255 | 0.568 | 0.389 | 3.65E-06    | 19 STRN       |
| 1.68E-09 | 0.51453587  | 0.417 | 0.259 | 5.39E-05    | 19 GK5        |
| 1.93E-09 | 0.513931455 | 0.548 | 0.365 | 6.19E-05    | 19 PPARG      |
| 2.05E-19 | 0.513699741 | 0.322 | 0.121 | 6.57E-15    | 19 TGFA       |
| 6.31E-11 | 0.51227275  | 0.362 | 0.194 | 2.03E-06    | 19 MFAP3      |
| 6.25E-12 | 0.511377144 | 0.467 | 0.282 | 2.01E-07    | 19 NAPEPLD    |
| 2.50E-13 | 0.511059316 | 0.709 | 0.496 | 8.02E-09    | 19 RCOR3      |
| 7.41E-13 | 0.509548665 | 0.583 | 0.347 | 2.38E-08    | 19 DSE        |
| 9.98E-12 | 0.509324955 | 0.583 | 0.388 | 3.21E-07    | 19 MINDY2     |
| 4.84E-07 | 0.509176236 | 0.623 | 0.479 | 0.01553758  | 19 SNRK       |
| 1.02E-30 | 0.508356048 | 0.442 | 0.146 | 3.27E-26    | 19 KLHL29     |
| 3.39E-11 | 0.508271003 | 0.799 | 0.651 | 1.09E-06    | 19 PTPRK      |
| 3.39E-15 | 0.508070364 | 0.824 | 0.598 | 1.09E-10    | 19 KTN1       |
| 5.58E-13 | 0.507803977 | 0.497 | 0.291 | 1.79E-08    | 19 ADHFE1     |
| 1.68E-12 | 0.507796994 | 0.819 | 0.582 | 5.40E-08    | 19 LAMB1      |
| 5.66E-07 | 0.507310134 | 0.442 | 0.318 | 0.018180242 | 19 AC001226.2 |
| 1.58E-12 | 0.506843732 | 0.678 | 0.479 | 5.09E-08    | 19 USP33      |
| 4.19E-11 | 0.506664447 | 0.467 | 0.282 | 1.35E-06    | 19 ZNF611     |
| 1.20E-13 | 0.50567864  | 0.432 | 0.231 | 3.86E-09    | 19 ABHD12     |
| 3.97E-08 | 0.505237577 | 0.432 | 0.283 | 0.001274714 | 19 ZC3H6      |
| 2.88E-13 | 0.504768117 | 0.266 | 0.11  | 9.24E-09    | 19 AC090227.2 |
| 1.22E-11 | 0.504409297 | 0.925 | 0.814 | 3.93E-07    | 19 MAPK10     |
| 1.51E-15 | 0.50333209  | 0.638 | 0.41  | 4.85E-11    | 19 NBP26      |
| 7.51E-15 | 0.502509687 | 0.749 | 0.523 | 2.41E-10    | 19 ZNF83      |
| 1.04E-10 | 0.502394603 | 0.729 | 0.563 | 3.35E-06    | 19 ZZZ3       |
| 4.86E-20 | 0.501809178 | 0.975 | 0.813 | 1.56E-15    | 19 PARD3B     |
| 1.22E-17 | 0.500217954 | 0.392 | 0.174 | 3.91E-13    | 19 ABO        |
| 2.26E-05 | 0.500194777 | 0.382 | 0.265 | 0.726336371 | 19 LINC01266  |
| 2.47E-24 | 0.499804864 | 0.402 | 0.144 | 7.94E-20    | 19 FGFR3      |
| 2.73E-13 | 0.499037028 | 0.638 | 0.417 | 8.77E-09    | 19 DNAH7      |
| 5.74E-13 | 0.498628427 | 0.402 | 0.216 | 1.84E-08    | 19 WDR35      |
| 4.25E-11 | 0.497352175 | 0.538 | 0.342 | 1.36E-06    | 19 FBXL13     |
| 1.71E-13 | 0.495720157 | 0.452 | 0.238 | 5.50E-09    | 19 AC068234.1 |
| 8.75E-36 | 0.495620768 | 0.276 | 0.061 | 2.81E-31    | 19 PIK3C2B    |
| 1.64E-14 | 0.494766972 | 0.447 | 0.228 | 5.27E-10    | 19 RNF217     |
| 3.21E-10 | 0.491056349 | 0.417 | 0.239 | 1.03E-05    | 19 SERINC5    |
| 1.03E-09 | 0.490653129 | 0.518 | 0.338 | 3.32E-05    | 19 KIF21A     |
| 1.05E-38 | 0.489882335 | 0.307 | 0.07  | 3.36E-34    | 19 OR2A1      |
| 1.25E-16 | 0.489465255 | 0.256 | 0.091 | 4.02E-12    | 19 IER2       |
| 7.10E-21 | 0.489185897 | 0.719 | 0.422 | 2.28E-16    | 19 EPS8L2     |
| 8.78E-13 | 0.489068223 | 0.583 | 0.357 | 2.82E-08    | 19 NRIP1      |
| 5.48E-12 | 0.488575303 | 0.704 | 0.52  | 1.76E-07    | 19 ZNF254     |
| 7.14E-13 | 0.488572263 | 0.397 | 0.204 | 2.29E-08    | 19 PLCH1      |
| 1.37E-19 | 0.487653358 | 0.462 | 0.199 | 4.40E-15    | 19 ADGRF1     |
| 1.83E-10 | 0.486448345 | 0.447 | 0.272 | 5.87E-06    | 19 CLTA       |
| 1.55E-06 | 0.485050459 | 0.261 | 0.148 | 0.04980828  | 19 HBG2       |
| 1.39E-13 | 0.484796845 | 0.251 | 0.097 | 4.46E-09    | 19 GLI3       |
| 9.87E-15 | 0.482132083 | 0.528 | 0.292 | 3.17E-10    | 19 MALT1      |
| 9.42E-07 | 0.481787133 | 0.402 | 0.277 | 0.030261487 | 19 VKORC1L1   |

|            |             |       |       |             |                |
|------------|-------------|-------|-------|-------------|----------------|
| 1.10E-20   | 0.481510416 | 0.291 | 0.098 | 3.54E-16    | 19 PPL         |
| 6.66E-13   | 0.479583582 | 0.523 | 0.314 | 2.14E-08    | 19 MOK         |
| 9.08E-14   | 0.477409877 | 0.598 | 0.379 | 2.92E-09    | 19 ATP13A3     |
| 7.52E-14   | 0.477089188 | 0.583 | 0.363 | 2.42E-09    | 19 NOTCH2      |
| 1.08E-07   | 0.476913305 | 0.739 | 0.606 | 0.003479089 | 19 ZNF148      |
| 2.63E-09   | 0.476793513 | 0.698 | 0.547 | 8.46E-05    | 19 AC093752.1  |
| 1.02E-09   | 0.47606803  | 0.382 | 0.212 | 3.29E-05    | 19 TLE1        |
| 3.03E-14   | 0.473777623 | 0.915 | 0.692 | 9.73E-10    | 19 GNAQ        |
| 2.83E-06   | 0.472182064 | 0.447 | 0.32  | 0.091007439 | 19 GTDC1       |
| 1.19E-13   | 0.471843593 | 0.367 | 0.184 | 3.82E-09    | 19 HMGN1       |
| 2.88E-13   | 0.471096337 | 0.427 | 0.222 | 9.24E-09    | 19 AL390879.1  |
| 3.81E-08   | 0.471012319 | 0.538 | 0.385 | 0.001224306 | 19 ZNF33B      |
| 4.49E-15   | 0.470675599 | 0.482 | 0.251 | 1.44E-10    | 19 NSUN7       |
| 6.29E-07   | 0.470342346 | 0.467 | 0.31  | 0.020210512 | 19 UGT8        |
| 7.52E-15   | 0.47028791  | 0.302 | 0.126 | 2.41E-10    | 19 PHLDB1      |
| 0.00048846 | 0.470151601 | 0.291 | 0.204 | 1           | 19 C8orf37-AS1 |
| 3.03E-10   | 0.469613442 | 0.668 | 0.491 | 9.72E-06    | 19 ATF7IP      |
| 8.42E-10   | 0.469354639 | 0.417 | 0.254 | 2.70E-05    | 19 FRA10AC1    |
| 6.37E-11   | 0.46927124  | 0.482 | 0.299 | 2.05E-06    | 19 ANKAR       |
| 4.10E-07   | 0.468085574 | 0.487 | 0.344 | 0.013158326 | 19 AC053527.2  |
| 3.09E-13   | 0.46736757  | 0.322 | 0.139 | 9.91E-09    | 19 NTRK2       |
| 1.47E-07   | 0.465345145 | 0.442 | 0.29  | 0.004710004 | 19 NMNAT3      |
| 1.12E-11   | 0.465246909 | 0.447 | 0.254 | 3.60E-07    | 19 AC104389.5  |
| 6.95E-08   | 0.465021202 | 0.603 | 0.447 | 0.002233192 | 19 ATG10       |
| 5.23E-08   | 0.462547571 | 0.256 | 0.131 | 0.001678495 | 19 AC107021.1  |
| 4.71E-14   | 0.462163104 | 0.533 | 0.317 | 1.51E-09    | 19 RAB30-DT    |
| 9.07E-14   | 0.461383055 | 0.518 | 0.296 | 2.91E-09    | 19 INTU        |
| 3.42E-08   | 0.46071806  | 0.447 | 0.29  | 0.001099583 | 19 DSTN        |
| 2.74E-10   | 0.460601075 | 0.543 | 0.37  | 8.79E-06    | 19 ZBTB44      |
| 6.34E-12   | 0.459851079 | 0.523 | 0.318 | 2.04E-07    | 19 DZIP3       |
| 4.62E-16   | 0.45904868  | 0.286 | 0.111 | 1.48E-11    | 19 RPGRIP1L    |
| 8.70E-12   | 0.458608975 | 0.613 | 0.413 | 2.79E-07    | 19 MPRIP       |
| 2.43E-19   | 0.458054055 | 0.281 | 0.096 | 7.80E-15    | 19 PROSER2     |
| 2.68E-08   | 0.457516932 | 0.563 | 0.402 | 0.000861156 | 19 LARP1B      |
| 1.14E-23   | 0.457067122 | 0.256 | 0.07  | 3.67E-19    | 19 LINC01781   |
| 6.92E-13   | 0.455852282 | 0.317 | 0.143 | 2.22E-08    | 19 ANXA3       |
| 2.28E-12   | 0.454541206 | 0.271 | 0.12  | 7.31E-08    | 19 SMAD7       |
| 3.18E-09   | 0.454086469 | 0.764 | 0.563 | 0.000102143 | 19 MAP7        |
| 5.69E-13   | 0.453135897 | 0.412 | 0.217 | 1.83E-08    | 19 LRRC6       |
| 2.55E-11   | 0.452209493 | 0.663 | 0.462 | 8.19E-07    | 19 ATM         |
| 1.51E-09   | 0.451037849 | 0.347 | 0.194 | 4.85E-05    | 19 KIF27       |
| 4.16E-05   | 0.450994019 | 0.427 | 0.304 | 1           | 19 LINC02694   |
| 6.98E-11   | 0.450244743 | 0.352 | 0.182 | 2.24E-06    | 19 SPATA17     |
| 2.04E-14   | 0.449831746 | 0.387 | 0.182 | 6.54E-10    | 19 IQCA1       |
| 8.15E-05   | 0.449826291 | 0.412 | 0.292 | 1           | 19 AL050309.1  |
| 8.65E-12   | 0.449519153 | 0.623 | 0.415 | 2.78E-07    | 19 NEK11       |
| 2.69E-12   | 0.448207344 | 0.739 | 0.495 | 8.65E-08    | 19 ZNRF3       |
| 1.76E-10   | 0.448052906 | 0.668 | 0.489 | 5.65E-06    | 19 MICAL3      |
| 3.37E-08   | 0.446903371 | 0.638 | 0.473 | 0.001083857 | 19 COBL        |
| 1.31E-11   | 0.446593145 | 0.633 | 0.412 | 4.19E-07    | 19 LINC01138   |
| 4.97E-11   | 0.446326127 | 0.452 | 0.268 | 1.60E-06    | 19 SLC22A4     |

|            |             |       |       |             |                |
|------------|-------------|-------|-------|-------------|----------------|
| 1.23E-17   | 0.445909866 | 0.302 | 0.113 | 3.96E-13    | 19 DDX60L      |
| 6.05E-19   | 0.445291258 | 0.337 | 0.126 | 1.94E-14    | 19 USH1C       |
| 3.09E-08   | 0.443294676 | 0.598 | 0.436 | 0.000993061 | 19 SRGAP3      |
| 3.30E-07   | 0.443214836 | 0.422 | 0.28  | 0.010606743 | 19 TERF2IP     |
| 7.02E-09   | 0.44319878  | 0.296 | 0.154 | 0.000225585 | 19 JUN         |
| 2.56E-10   | 0.442956393 | 0.603 | 0.423 | 8.21E-06    | 19 ITM2B       |
| 1.13E-13   | 0.441663826 | 0.739 | 0.509 | 3.63E-09    | 19 KIFC3       |
| 1.47E-21   | 0.441217916 | 0.271 | 0.085 | 4.72E-17    | 19 WDFY3-AS2   |
| 6.84E-09   | 0.440858699 | 0.714 | 0.546 | 0.000219642 | 19 CBFA2T2     |
| 1.84E-12   | 0.440483629 | 0.492 | 0.289 | 5.92E-08    | 19 FP236241.1  |
| 1.93E-10   | 0.439587315 | 0.683 | 0.522 | 6.21E-06    | 19 RASAL2      |
| 2.47E-09   | 0.439376602 | 0.266 | 0.13  | 7.93E-05    | 19 AC109583.1  |
| 5.57E-10   | 0.438925992 | 0.779 | 0.621 | 1.79E-05    | 19 TBL1XR1     |
| 0.00037279 | 0.438826012 | 0.412 | 0.318 | 1           | 19 ZFP36L1     |
| 2.92E-09   | 0.438516126 | 0.578 | 0.398 | 9.38E-05    | 19 PITPNC1     |
| 7.63E-12   | 0.438481779 | 0.447 | 0.253 | 2.45E-07    | 19 FBXO17      |
| 7.55E-11   | 0.43801363  | 0.276 | 0.128 | 2.42E-06    | 19 CEP126      |
| 2.81E-06   | 0.437325975 | 0.663 | 0.532 | 0.090137116 | 19 MAML3       |
| 1.43E-05   | 0.436345996 | 0.302 | 0.191 | 0.458294712 | 19 STAT1       |
| 1.85E-09   | 0.4362869   | 0.312 | 0.162 | 5.95E-05    | 19 ALDH1A1     |
| 3.62E-09   | 0.436197238 | 0.548 | 0.37  | 0.00011638  | 19 ZCCHC14     |
| 1.87E-07   | 0.436052009 | 0.357 | 0.22  | 0.006002572 | 19 CEP63       |
| 1.63E-11   | 0.435884404 | 0.417 | 0.232 | 5.22E-07    | 19 RHPN2       |
| 5.68E-13   | 0.435485084 | 0.764 | 0.522 | 1.83E-08    | 19 HNF1A-AS1   |
| 1.46E-05   | 0.434964956 | 0.503 | 0.364 | 0.469202682 | 19 LMCD1-AS1   |
| 1.68E-15   | 0.434675634 | 0.533 | 0.284 | 5.40E-11    | 19 PLEKHA2     |
| 5.50E-11   | 0.434426815 | 0.754 | 0.559 | 1.77E-06    | 19 PHC3        |
| 7.24E-07   | 0.433417892 | 0.688 | 0.566 | 0.023255583 | 19 METTL15     |
| 2.96E-07   | 0.432522156 | 0.387 | 0.242 | 0.009519356 | 19 ADGRV1      |
| 1.34E-14   | 0.432352205 | 0.462 | 0.237 | 4.32E-10    | 19 RGS12       |
| 7.02E-20   | 0.431470368 | 0.94  | 0.733 | 2.26E-15    | 19 LINGO1      |
| 5.07E-13   | 0.431088994 | 0.437 | 0.231 | 1.63E-08    | 19 PLOD2       |
| 2.13E-09   | 0.431059438 | 0.608 | 0.436 | 6.84E-05    | 19 PRKRIP1     |
| 1.41E-17   | 0.430592604 | 0.427 | 0.188 | 4.53E-13    | 19 HUNK        |
| 2.63E-10   | 0.430537711 | 0.362 | 0.191 | 8.44E-06    | 19 CCDC122     |
| 1.50E-13   | 0.430459655 | 0.387 | 0.181 | 4.82E-09    | 19 TENM3       |
| 2.30E-08   | 0.430146811 | 0.613 | 0.447 | 0.000739014 | 19 FAT1        |
| 1.13E-06   | 0.430064664 | 0.819 | 0.696 | 0.036259427 | 19 GUSBP1      |
| 5.03E-12   | 0.429256973 | 0.573 | 0.359 | 1.62E-07    | 19 TEX9        |
| 4.17E-06   | 0.428849717 | 0.387 | 0.263 | 0.133880355 | 19 DOCK3       |
| 1.16E-09   | 0.428549163 | 0.422 | 0.254 | 3.72E-05    | 19 SDHAP3      |
| 7.17E-09   | 0.42818533  | 0.442 | 0.255 | 0.000230294 | 19 GLYAT       |
| 1.38E-10   | 0.428023047 | 0.573 | 0.392 | 4.44E-06    | 19 PARD6B      |
| 1.67E-09   | 0.426770454 | 0.769 | 0.615 | 5.37E-05    | 19 KDM6A       |
| 6.40E-10   | 0.426736043 | 0.734 | 0.553 | 2.06E-05    | 19 THADA       |
| 3.29E-10   | 0.426166819 | 0.884 | 0.731 | 1.06E-05    | 19 STAG1       |
| 3.80E-06   | 0.425467766 | 0.583 | 0.434 | 0.121908569 | 19 KIAA0825    |
| 4.84E-09   | 0.424207026 | 0.412 | 0.246 | 0.000155474 | 19 NPAS2       |
| 2.05E-08   | 0.424012874 | 0.377 | 0.223 | 0.000658183 | 19 DNAH6       |
| 5.00E-07   | 0.422886551 | 0.523 | 0.373 | 0.016061954 | 19 IQCJ-SCHIP1 |
| 2.09E-20   | 0.422787359 | 0.377 | 0.144 | 6.71E-16    | 19 DNMI        |

|            |             |       |       |             |                  |
|------------|-------------|-------|-------|-------------|------------------|
| 4.68E-13   | 0.42088211  | 0.296 | 0.128 | 1.50E-08    | 19 RNF144A       |
| 1.04E-11   | 0.420179747 | 0.497 | 0.295 | 3.33E-07    | 19 RBMS2         |
| 4.57E-08   | 0.419908398 | 0.613 | 0.464 | 0.00146891  | 19 MAP4K5        |
| 2.10E-09   | 0.419818139 | 0.769 | 0.608 | 6.75E-05    | 19 WDPCP         |
| 3.07E-11   | 0.419778872 | 0.568 | 0.368 | 9.86E-07    | 19 ODF2L         |
| 3.62E-09   | 0.419126311 | 0.633 | 0.47  | 0.000116259 | 19 GALNT11       |
| 1.24E-14   | 0.418307517 | 0.322 | 0.141 | 4.00E-10    | 19 WHAMMP3       |
| 1.36E-08   | 0.418283861 | 0.352 | 0.205 | 0.000437592 | 19 LNX2          |
| 8.17E-09   | 0.417397387 | 0.789 | 0.62  | 0.000262357 | 19 DNAH14        |
| 2.71E-11   | 0.416300381 | 0.387 | 0.211 | 8.69E-07    | 19 EVC2          |
| 6.42E-06   | 0.416010608 | 0.487 | 0.368 | 0.206194429 | 19 NPTN          |
| 7.26E-07   | 0.415786097 | 0.578 | 0.442 | 0.023320467 | 19 UBE2E3        |
| 3.24E-09   | 0.415774976 | 0.533 | 0.359 | 0.000104139 | 19 MIGA1         |
| 5.57E-11   | 0.414996002 | 0.291 | 0.131 | 1.79E-06    | 19 LINC02027     |
| 9.58E-08   | 0.414886308 | 0.538 | 0.393 | 0.003077806 | 19 RNF149        |
| 3.76E-06   | 0.414545162 | 0.392 | 0.278 | 0.120751333 | 19 AAMDC         |
| 6.77E-16   | 0.414249924 | 0.291 | 0.115 | 2.17E-11    | 19 PLEKHF2       |
| 2.65E-06   | 0.413931066 | 0.271 | 0.157 | 0.085256044 | 19 IKZF2         |
| 8.70E-10   | 0.412938698 | 0.472 | 0.289 | 2.79E-05    | 19 CELSR1        |
| 1.82E-07   | 0.412155791 | 0.698 | 0.572 | 0.005839666 | 19 ARID2         |
| 0.00175424 | 0.412138747 | 0.332 | 0.255 | 1           | 19 SINHCAF       |
| 2.92E-14   | 0.41137664  | 0.302 | 0.127 | 9.38E-10    | 19 WAC-AS1       |
| 2.94E-11   | 0.410945071 | 0.382 | 0.201 | 9.43E-07    | 19 FANK1         |
| 3.61E-12   | 0.410541077 | 0.764 | 0.542 | 1.16E-07    | 19 PAX2          |
| 2.27E-09   | 0.410413156 | 0.623 | 0.46  | 7.29E-05    | 19 NBPFP19       |
| 4.56E-11   | 0.410229273 | 0.462 | 0.267 | 1.46E-06    | 19 CRYZL2P-SEC10 |
| 1.16E-15   | 0.409879614 | 0.935 | 0.739 | 3.72E-11    | 19 PICALM        |
| 1.21E-07   | 0.409277923 | 0.377 | 0.239 | 0.003884907 | 19 TMM67         |
| 0.00096101 | 0.408456909 | 0.392 | 0.298 | 1           | 19 ZNF385B       |
| 1.51E-06   | 0.408393664 | 0.352 | 0.222 | 0.048435138 | 19 SLC22A2       |
| 2.04E-06   | 0.408260379 | 0.402 | 0.26  | 0.065630721 | 19 CNTN3         |
| 5.81E-11   | 0.407712348 | 0.286 | 0.137 | 1.86E-06    | 19 ARHGEF5       |
| 1.31E-09   | 0.407139667 | 0.347 | 0.191 | 4.21E-05    | 19 CFAP91        |
| 6.73E-10   | 0.406739259 | 0.563 | 0.384 | 2.16E-05    | 19 AC073107.1    |
| 1.38E-09   | 0.406297489 | 0.683 | 0.481 | 4.43E-05    | 19 MYO1D         |
| 5.18E-08   | 0.40592648  | 0.276 | 0.15  | 0.001662294 | 19 AC012618.3    |
| 3.63E-05   | 0.404578562 | 0.296 | 0.188 | 1           | 19 LEPR          |
| 1.46E-07   | 0.403049733 | 0.342 | 0.206 | 0.004674272 | 19 CLHC1         |
| 5.52E-10   | 0.402831455 | 0.558 | 0.369 | 1.77E-05    | 19 FNBP1         |
| 2.55E-07   | 0.402108913 | 0.422 | 0.29  | 0.008200703 | 19 AC139769.1    |
| 9.90E-07   | 0.402071175 | 0.271 | 0.157 | 0.031781958 | 19 NR1D2         |
| 1.28E-11   | 0.401880954 | 0.256 | 0.111 | 4.10E-07    | 19 PTCH1         |
| 1.04E-08   | 0.399047875 | 0.844 | 0.707 | 0.000334536 | 19 SCAPER        |
| 1.16E-06   | 0.398200633 | 0.392 | 0.267 | 0.037181161 | 19 UBE2Q2P2      |
| 1.42E-09   | 0.39780614  | 0.447 | 0.281 | 4.56E-05    | 19 NIPSNAP2      |
| 7.32E-09   | 0.396546894 | 0.804 | 0.616 | 0.000235062 | 19 PRKD1         |
| 6.80E-07   | 0.39631137  | 0.382 | 0.245 | 0.021841026 | 19 JAZF1         |
| 7.90E-12   | 0.396253207 | 0.548 | 0.324 | 2.54E-07    | 19 ATP11A        |
| 1.88E-15   | 0.395825631 | 0.337 | 0.14  | 6.04E-11    | 19 CAMK1D        |
| 3.30E-10   | 0.395620264 | 0.487 | 0.294 | 1.06E-05    | 19 LAMC1         |
| 8.17E-05   | 0.395440332 | 0.482 | 0.372 | 1           | 19 TBC1D32       |

|          |             |       |       |             |                 |
|----------|-------------|-------|-------|-------------|-----------------|
| 2.06E-09 | 0.395391378 | 0.352 | 0.196 | 6.61E-05    | 19 RMDN2        |
| 2.54E-07 | 0.39530408  | 0.462 | 0.31  | 0.008145711 | 19 RRAS2        |
| 6.98E-07 | 0.39528807  | 0.422 | 0.292 | 0.022425619 | 19 AC092574.2   |
| 1.70E-08 | 0.395130479 | 0.663 | 0.514 | 0.000545215 | 19 COA1         |
| 2.34E-12 | 0.394646037 | 0.312 | 0.146 | 7.51E-08    | 19 RHOXF1-AS1   |
| 1.30E-09 | 0.393748367 | 0.729 | 0.552 | 4.18E-05    | 19 RAB3IP       |
| 7.13E-08 | 0.393480035 | 0.362 | 0.208 | 0.002289475 | 19 ROR1         |
| 6.80E-09 | 0.393024277 | 0.482 | 0.306 | 0.00021836  | 19 ABCB1        |
| 2.59E-06 | 0.392305291 | 0.357 | 0.217 | 0.083324187 | 19 AL589669.1   |
| 1.15E-13 | 0.391670058 | 0.543 | 0.311 | 3.68E-09    | 19 ZNF69        |
| 2.47E-06 | 0.390578362 | 0.789 | 0.634 | 0.079299262 | 19 MTRNR2L12    |
| 6.48E-11 | 0.390018777 | 0.96  | 0.8   | 2.08E-06    | 19 SOX6         |
| 9.39E-05 | 0.389765339 | 0.417 | 0.316 | 1           | 19 FSIP2        |
| 3.08E-13 | 0.389498959 | 0.377 | 0.189 | 9.90E-09    | 19 PMS2P1       |
| 1.59E-05 | 0.388650733 | 0.412 | 0.301 | 0.509252152 | 19 PTPN9        |
| 8.60E-07 | 0.387363615 | 0.377 | 0.246 | 0.027624707 | 19 DDAH1        |
| 4.11E-05 | 0.386926043 | 0.417 | 0.304 | 1           | 19 TRAF3IP2-AS1 |
| 8.83E-06 | 0.38688173  | 0.402 | 0.269 | 0.283611653 | 19 EDA          |
| 1.87E-08 | 0.386372634 | 0.382 | 0.225 | 0.000599185 | 19 SUFU         |
| 4.85E-12 | 0.385813238 | 0.744 | 0.523 | 1.56E-07    | 19 ANKRD36      |
| 5.75E-09 | 0.385811712 | 0.337 | 0.19  | 0.000184782 | 19 NPHP1        |
| 9.15E-08 | 0.385374836 | 0.492 | 0.35  | 0.002938134 | 19 DDX6         |
| 3.36E-10 | 0.384330107 | 0.347 | 0.189 | 1.08E-05    | 19 GOLGA8M      |
| 4.96E-11 | 0.384318132 | 0.508 | 0.306 | 1.59E-06    | 19 CFAP69       |
| 9.57E-10 | 0.382773056 | 0.849 | 0.665 | 3.07E-05    | 19 PTPN13       |
| 1.74E-07 | 0.382312006 | 0.578 | 0.413 | 0.005602739 | 19 NEO1         |
| 3.53E-08 | 0.382131269 | 0.387 | 0.241 | 0.001133257 | 19 BBS4         |
| 1.28E-09 | 0.381773493 | 0.523 | 0.329 | 4.12E-05    | 19 NR2F2-AS1    |
| 2.05E-08 | 0.381492106 | 0.452 | 0.283 | 0.000657587 | 19 CSRNP3       |
| 1.41E-07 | 0.381049802 | 0.784 | 0.585 | 0.004526209 | 19 TRABD2B      |
| 3.59E-05 | 0.380074716 | 0.487 | 0.369 | 1           | 19 LDAH         |
| 1.51E-13 | 0.378988745 | 0.251 | 0.099 | 4.86E-09    | 19 CFAP251      |
| 3.05E-05 | 0.378502848 | 0.503 | 0.404 | 0.980761684 | 19 CTDSPL2      |
| 1.43E-06 | 0.378330882 | 0.452 | 0.304 | 0.045952443 | 19 SLC39A10     |
| 6.68E-10 | 0.377983463 | 0.291 | 0.144 | 2.14E-05    | 19 SPAG1        |
| 5.29E-12 | 0.377302351 | 0.357 | 0.18  | 1.70E-07    | 19 PLEKHG3      |
| 4.07E-10 | 0.377078447 | 0.97  | 0.831 | 1.31E-05    | 19 DDX17        |
| 1.29E-08 | 0.376760271 | 0.754 | 0.583 | 0.000415421 | 19 SETD5        |
| 1.15E-09 | 0.375673    | 0.322 | 0.169 | 3.69E-05    | 19 ZNF337-AS1   |
| 6.32E-19 | 0.375662452 | 0.402 | 0.161 | 2.03E-14    | 19 KIRREL1      |
| 5.61E-05 | 0.375107981 | 0.442 | 0.341 | 1           | 19 HNRNPR       |
| 1.20E-08 | 0.374751153 | 0.442 | 0.281 | 0.000386458 | 19 KCTD20       |
| 1.07E-07 | 0.374633724 | 0.513 | 0.354 | 0.003433591 | 19 FBXL2        |
| 4.65E-06 | 0.37389862  | 0.352 | 0.236 | 0.149261367 | 19 TOMM70       |
| 2.61E-07 | 0.373523264 | 0.402 | 0.26  | 0.008377569 | 19 WDR19        |
| 1.89E-07 | 0.373441939 | 0.598 | 0.451 | 0.006084355 | 19 CD46         |
| 9.85E-08 | 0.372949237 | 0.633 | 0.474 | 0.003164118 | 19 DMTF1        |
| 7.43E-09 | 0.372525054 | 0.382 | 0.225 | 0.000238632 | 19 CAT          |
| 1.62E-11 | 0.372156163 | 0.307 | 0.145 | 5.20E-07    | 19 TRHDE-AS1    |
| 6.37E-06 | 0.371888951 | 0.392 | 0.275 | 0.204524409 | 19 MRPL45P2     |
| 9.75E-08 | 0.370430264 | 0.377 | 0.228 | 0.003133007 | 19 ARRDC3       |

|            |             |       |       |             |               |
|------------|-------------|-------|-------|-------------|---------------|
| 1.67E-09   | 0.370035289 | 0.317 | 0.166 | 5.37E-05    | 19 RASGRP1    |
| 2.56E-07   | 0.369780423 | 0.754 | 0.615 | 0.008228419 | 19 SIPA1L1    |
| 7.14E-05   | 0.369266087 | 0.462 | 0.357 | 1           | 19 MBTD1      |
| 2.19E-07   | 0.36885582  | 0.688 | 0.51  | 0.007043149 | 19 GAB1       |
| 9.95E-05   | 0.36803562  | 0.302 | 0.201 | 1           | 19 TCEA3      |
| 4.96E-15   | 0.367953793 | 0.312 | 0.128 | 1.59E-10    | 19 MFAP3L     |
| 1.10E-05   | 0.367911261 | 0.327 | 0.208 | 0.35455876  | 19 AP000317.2 |
| 9.75E-06   | 0.367593108 | 0.633 | 0.491 | 0.313174442 | 19 CCDC148    |
| 4.57E-06   | 0.36696614  | 0.563 | 0.434 | 0.146659881 | 19 ZNF280D    |
| 8.42E-16   | 0.366928645 | 0.729 | 0.388 | 2.71E-11    | 19 CACNA2D3   |
| 9.44E-13   | 0.366706198 | 0.588 | 0.362 | 3.03E-08    | 19 HSP90AA1   |
| 7.96E-13   | 0.366380349 | 0.99  | 0.88  | 2.56E-08    | 19 SYNE2      |
| 2.04E-07   | 0.365938403 | 0.93  | 0.821 | 0.006564824 | 19 TBC1D5     |
| 0.00014024 | 0.365887126 | 0.533 | 0.422 | 1           | 19 TCAIM      |
| 6.99E-09   | 0.365211    | 0.693 | 0.527 | 0.000224497 | 19 IFT88      |
| 1.01E-08   | 0.365097578 | 0.387 | 0.232 | 0.000325377 | 19 PEX3       |
| 6.98E-06   | 0.364763685 | 0.402 | 0.279 | 0.224073366 | 19 CFAP44     |
| 1.66E-09   | 0.364535967 | 0.382 | 0.229 | 5.32E-05    | 19 STAG3L5P   |
| 7.46E-09   | 0.364495741 | 0.482 | 0.313 | 0.000239689 | 19 BRCA1      |
| 7.90E-10   | 0.364468479 | 0.513 | 0.327 | 2.54E-05    | 19 SEPTIN10   |
| 5.20E-16   | 0.364466336 | 0.291 | 0.109 | 1.67E-11    | 19 NOSTRIN    |
| 2.98E-06   | 0.364357455 | 0.407 | 0.283 | 0.09556486  | 19 PRKD3      |
| 1.60E-06   | 0.364350926 | 0.598 | 0.465 | 0.051388225 | 19 BTBD7      |
| 4.36E-07   | 0.363599089 | 0.417 | 0.275 | 0.01400366  | 19 ZNF652     |
| 8.43E-14   | 0.363034231 | 0.397 | 0.176 | 2.71E-09    | 19 GLIS1      |
| 7.34E-05   | 0.362160814 | 0.447 | 0.335 | 1           | 19 NMD3       |
| 2.18E-07   | 0.362105127 | 0.407 | 0.264 | 0.007005014 | 19 SPATA7     |
| 8.43E-07   | 0.360919201 | 0.528 | 0.385 | 0.027082751 | 19 ACVR1      |
| 6.96E-06   | 0.35990271  | 0.487 | 0.37  | 0.223570813 | 19 SUPT20H    |
| 2.37E-08   | 0.359865412 | 0.658 | 0.498 | 0.000760676 | 19 PAWR       |
| 3.64E-06   | 0.358827296 | 0.322 | 0.199 | 0.116888718 | 19 LRIG3      |
| 2.44E-11   | 0.358447714 | 0.367 | 0.181 | 7.83E-07    | 19 AC005062.1 |
| 1.35E-06   | 0.358424206 | 0.558 | 0.433 | 0.04320388  | 19 VEZT       |
| 7.85E-06   | 0.358297627 | 0.382 | 0.262 | 0.25215609  | 19 NKAPP1     |
| 1.63E-06   | 0.357436633 | 0.387 | 0.262 | 0.052368623 | 19 SMN1       |
| 7.24E-07   | 0.357333771 | 0.407 | 0.273 | 0.023267285 | 19 CLSTN1     |
| 3.66E-08   | 0.355763758 | 0.347 | 0.2   | 0.001174556 | 19 TTC8       |
| 4.12E-06   | 0.355287192 | 0.342 | 0.224 | 0.132351001 | 19 PDE5A      |
| 3.75E-06   | 0.354929365 | 0.392 | 0.261 | 0.120460927 | 19 GPD2       |
| 5.50E-06   | 0.354117745 | 0.447 | 0.317 | 0.176692355 | 19 EIF3E      |
| 1.22E-07   | 0.35384727  | 0.392 | 0.247 | 0.00391301  | 19 UNK        |
| 4.30E-09   | 0.353820327 | 0.307 | 0.166 | 0.000138014 | 19 WHAMMP2    |
| 7.75E-09   | 0.353365812 | 0.719 | 0.549 | 0.000248902 | 19 C2orf42    |
| 5.79E-15   | 0.35320429  | 0.266 | 0.102 | 1.86E-10    | 19 RRN3P1     |
| 2.88E-09   | 0.352891933 | 0.95  | 0.802 | 9.24E-05    | 19 MED13L     |
| 7.07E-06   | 0.352858505 | 0.256 | 0.155 | 0.227011555 | 19 ZFAND1     |
| 3.91E-06   | 0.352314033 | 0.256 | 0.15  | 0.12568323  | 19 FAM66D     |
| 0.00018981 | 0.352126162 | 0.342 | 0.253 | 1           | 19 SERP1      |
| 1.53E-19   | 0.351691747 | 0.884 | 0.675 | 4.92E-15    | 19 SYNE1      |
| 5.23E-05   | 0.351667379 | 0.437 | 0.324 | 1           | 19 MIPEP      |
| 7.79E-09   | 0.351324106 | 0.307 | 0.167 | 0.000250138 | 19 PTGR2      |



|            |             |       |       |             |               |
|------------|-------------|-------|-------|-------------|---------------|
| 1.15E-05   | 0.351322853 | 0.367 | 0.247 | 0.368910464 | 19 SCARB2     |
| 3.47E-09   | 0.351249481 | 0.568 | 0.368 | 0.000111314 | 19 DGKH       |
| 9.10E-11   | 0.350304755 | 0.663 | 0.42  | 2.92E-06    | 19 COL4A5     |
| 9.95E-05   | 0.349956938 | 0.362 | 0.257 | 1           | 19 WDR12      |
| 2.33E-06   | 0.349841683 | 0.633 | 0.506 | 0.074906027 | 19 GTF2I      |
| 3.30E-07   | 0.349055452 | 0.387 | 0.247 | 0.01058365  | 19 AKT2       |
| 5.81E-07   | 0.348479123 | 0.407 | 0.256 | 0.018665091 | 19 DOCK8      |
| 5.14E-09   | 0.348204489 | 0.834 | 0.65  | 0.000165213 | 19 EHBP1      |
| 8.79E-06   | 0.348046006 | 0.422 | 0.3   | 0.28233292  | 19 LINC00623  |
| 5.08E-06   | 0.348016743 | 0.558 | 0.407 | 0.163036694 | 19 LINC01376  |
| 1.88E-11   | 0.3478503   | 0.251 | 0.107 | 6.03E-07    | 19 TMX4       |
| 3.11E-07   | 0.34639797  | 0.276 | 0.154 | 0.009992886 | 19 ARSD       |
| 1.74E-05   | 0.345299285 | 0.487 | 0.37  | 0.559466851 | 19 MTA3       |
| 8.24E-11   | 0.345124237 | 0.271 | 0.124 | 2.65E-06    | 19 DMKN       |
| 2.63E-09   | 0.344914571 | 0.422 | 0.256 | 8.45E-05    | 19 INTS3      |
| 4.64E-07   | 0.344662093 | 0.513 | 0.357 | 0.014917668 | 19 RAP1GAP2   |
| 2.66E-06   | 0.344517566 | 0.573 | 0.448 | 0.085536093 | 19 SMG1P5     |
| 1.13E-10   | 0.344300642 | 0.256 | 0.116 | 3.64E-06    | 19 AC008758.6 |
| 0.00171726 | 0.343403681 | 0.372 | 0.284 | 1           | 19 PCDHGA1    |
| 0.00058332 | 0.3430165   | 0.347 | 0.251 | 1           | 19 CASC2      |
| 1.13E-06   | 0.342908288 | 0.256 | 0.138 | 0.036425812 | 19 LINC01697  |
| 2.08E-06   | 0.342576077 | 0.417 | 0.289 | 0.066736237 | 19 GSAP       |
| 0.00034293 | 0.34209401  | 0.337 | 0.243 | 1           | 19 ACAT1      |
| 1.25E-11   | 0.342068717 | 0.256 | 0.108 | 4.01E-07    | 19 ID2        |
| 2.95E-07   | 0.34095738  | 0.673 | 0.545 | 0.009482863 | 19 CPLANE1    |
| 1.01E-07   | 0.340948804 | 0.578 | 0.404 | 0.003237497 | 19 MAP3K5     |
| 1.79E-06   | 0.340723053 | 0.462 | 0.316 | 0.057469953 | 19 ADCY9      |
| 8.74E-08   | 0.340656982 | 0.638 | 0.498 | 0.002807678 | 19 SMAD3      |
| 1.45E-10   | 0.340589695 | 0.271 | 0.124 | 4.65E-06    | 19 BTBD8      |
| 0.00063169 | 0.340213635 | 0.432 | 0.346 | 1           | 19 PIK3CA     |
| 4.24E-12   | 0.340041615 | 0.427 | 0.211 | 1.36E-07    | 19 NRK        |
| 6.71E-07   | 0.339910563 | 0.402 | 0.272 | 0.021559697 | 19 RNF121     |
| 3.13E-06   | 0.339909414 | 0.658 | 0.554 | 0.100466895 | 19 SIPA1L3    |
| 1.12E-05   | 0.339679622 | 0.558 | 0.452 | 0.359328884 | 19 CPSF6      |
| 1.17E-16   | 0.339546711 | 0.513 | 0.268 | 3.75E-12    | 19 HOMER1     |
| 1.67E-07   | 0.339504822 | 0.457 | 0.318 | 0.005367105 | 19 CEP43      |
| 5.92E-07   | 0.339426465 | 0.628 | 0.461 | 0.019028171 | 19 CCDC50     |
| 2.90E-07   | 0.338179349 | 0.894 | 0.73  | 0.009321738 | 19 DOCK1      |
| 1.34E-08   | 0.337943988 | 0.296 | 0.155 | 0.000429507 | 19 KATNAL1    |
| 2.40E-05   | 0.337231022 | 0.754 | 0.645 | 0.771916051 | 19 RAPGEF2    |
| 0.00012926 | 0.336470121 | 0.598 | 0.493 | 1           | 19 HOXB3      |
| 3.18E-10   | 0.336230396 | 0.357 | 0.184 | 1.02E-05    | 19 IL1R1      |
| 2.83E-08   | 0.335880102 | 0.377 | 0.226 | 0.000909833 | 19 CNDP2      |
| 6.25E-07   | 0.335833219 | 0.362 | 0.226 | 0.020075616 | 19 ZNF507     |
| 5.40E-06   | 0.335146016 | 0.543 | 0.41  | 0.173285828 | 19 MIPOL1     |
| 1.05E-05   | 0.335066789 | 0.663 | 0.535 | 0.336198513 | 19 PIBF1      |
| 9.58E-06   | 0.334364337 | 0.382 | 0.244 | 0.307752917 | 19 PPP2R2B    |
| 6.17E-08   | 0.333831064 | 0.608 | 0.416 | 0.001982516 | 19 SPATS2L    |
| 2.30E-07   | 0.333501424 | 0.352 | 0.213 | 0.007371941 | 19 SWAP70     |
| 3.81E-05   | 0.333451007 | 0.387 | 0.279 | 1           | 19 KDM1A      |
| 6.75E-13   | 0.332815075 | 0.794 | 0.574 | 2.17E-08    | 19 CRIM1      |

|            |             |       |       |             |                 |
|------------|-------------|-------|-------|-------------|-----------------|
| 5.71E-16   | 0.331625992 | 0.302 | 0.116 | 1.84E-11    | 19 ARHGAP31     |
| 0.00024588 | 0.331572359 | 0.286 | 0.195 | 1           | 19 FPGT-TNNI3K  |
| 4.98E-08   | 0.33154831  | 0.583 | 0.387 | 0.001600833 | 19 SIM1         |
| 7.10E-10   | 0.331224082 | 0.392 | 0.212 | 2.28E-05    | 19 REPS2        |
| 5.54E-06   | 0.331211173 | 0.578 | 0.453 | 0.177884702 | 19 ARMCX4       |
| 8.93E-05   | 0.330604085 | 0.377 | 0.274 | 1           | 19 ZNF736       |
| 8.90E-09   | 0.329382367 | 0.357 | 0.203 | 0.000285982 | 19 MTIF3        |
| 0.00011031 | 0.329045551 | 0.548 | 0.432 | 1           | 19 NRXN3        |
| 7.49E-06   | 0.328992498 | 0.588 | 0.456 | 0.240554613 | 19 ZNF618       |
| 3.18E-11   | 0.328341954 | 0.342 | 0.169 | 1.02E-06    | 19 SRP54-AS1    |
| 2.38E-07   | 0.32830471  | 0.317 | 0.184 | 0.00763232  | 19 C21orf62-AS1 |
| 0.00264134 | 0.327228875 | 0.256 | 0.188 | 1           | 19 POLR3B       |
| 4.01E-05   | 0.327171818 | 0.648 | 0.531 | 1           | 19 DCAF6        |
| 3.67E-08   | 0.326893681 | 0.734 | 0.533 | 0.001179798 | 19 TLN2         |
| 1.94E-07   | 0.326497103 | 0.477 | 0.318 | 0.00622307  | 19 IQCK         |
| 5.24E-05   | 0.326492585 | 0.603 | 0.503 | 1           | 19 NUP214       |
| 1.58E-06   | 0.326099022 | 0.623 | 0.487 | 0.050868535 | 19 CUL5         |
| 3.47E-07   | 0.325207157 | 0.482 | 0.328 | 0.011128928 | 19 SNX2         |
| 0.00037706 | 0.324626417 | 0.281 | 0.196 | 1           | 19 RCHY1        |
| 5.73E-06   | 0.324337095 | 0.452 | 0.327 | 0.184142521 | 19 SPEF2        |
| 1.28E-08   | 0.32403252  | 0.337 | 0.185 | 0.000411834 | 19 PELI1        |
| 3.22E-06   | 0.323349993 | 0.794 | 0.645 | 0.103407418 | 19 PHLDB2       |
| 2.41E-08   | 0.323048749 | 0.538 | 0.359 | 0.000775439 | 19 NAIP         |
| 1.77E-06   | 0.322901225 | 0.332 | 0.209 | 0.056779357 | 19 GOPC         |
| 1.03E-05   | 0.322757497 | 0.593 | 0.441 | 0.332120505 | 19 DEPTOR       |
| 0.00036287 | 0.322339552 | 0.573 | 0.461 | 1           | 19 LINC00894    |
| 0.00056582 | 0.321711579 | 0.327 | 0.23  | 1           | 19 TNFRSF19     |
| 7.63E-05   | 0.321494814 | 0.533 | 0.445 | 1           | 19 SLC25A36     |
| 5.79E-06   | 0.32097685  | 0.392 | 0.268 | 0.186015864 | 19 JMY          |
| 5.73E-09   | 0.32095593  | 0.312 | 0.166 | 0.000184005 | 19 ZNF468       |
| 5.83E-06   | 0.320293514 | 0.829 | 0.72  | 0.187220658 | 19 EXOC6B       |
| 7.11E-05   | 0.320213304 | 0.497 | 0.382 | 1           | 19 MYO5B        |
| 1.06E-06   | 0.320124134 | 0.638 | 0.485 | 0.034100873 | 19 CAST         |
| 5.57E-05   | 0.320040446 | 0.307 | 0.207 | 1           | 19 ZNHIT6       |
| 2.29E-06   | 0.31982068  | 0.563 | 0.42  | 0.073428577 | 19 RASA2        |
| 5.53E-07   | 0.318852668 | 0.477 | 0.324 | 0.017769907 | 19 NUP160       |
| 8.08E-08   | 0.318654293 | 0.673 | 0.491 | 0.002595725 | 19 ZFHX3        |
| 0.00142571 | 0.318577915 | 0.518 | 0.426 | 1           | 19 SPATA5       |
| 2.42E-05   | 0.317556279 | 0.613 | 0.482 | 0.778472538 | 19 RORA-AS1     |
| 0.00086458 | 0.317055544 | 0.332 | 0.243 | 1           | 19 TARS3        |
| 0.00012343 | 0.315496703 | 0.678 | 0.574 | 1           | 19 SSH2         |
| 1.36E-06   | 0.314932375 | 0.417 | 0.282 | 0.043643107 | 19 LINC02241    |
| 3.67E-07   | 0.314764072 | 0.251 | 0.131 | 0.011798627 | 19 LINC01550    |
| 1.24E-06   | 0.314471784 | 0.337 | 0.213 | 0.039959844 | 19 UFM1         |
| 0.0002455  | 0.314357957 | 0.603 | 0.517 | 1           | 19 NEK7         |
| 1.50E-06   | 0.313965531 | 0.683 | 0.564 | 0.048062788 | 19 RNF111       |
| 3.72E-05   | 0.313697969 | 0.281 | 0.18  | 1           | 19 MPZL1        |
| 5.52E-06   | 0.312942348 | 0.372 | 0.239 | 0.177384555 | 19 VEPH1        |
| 1.56E-05   | 0.312363695 | 0.382 | 0.27  | 0.499785184 | 19 DTWD1        |
| 9.04E-07   | 0.312327905 | 0.447 | 0.3   | 0.029018683 | 19 PHACTR1      |
| 8.69E-07   | 0.311831666 | 0.387 | 0.248 | 0.027912207 | 19 ZNF429       |

|            |             |       |       |             |               |
|------------|-------------|-------|-------|-------------|---------------|
| 0.00995177 | 0.311730928 | 0.317 | 0.255 | 1           | 19 ZNF846     |
| 2.57E-05   | 0.31148599  | 0.688 | 0.568 | 0.826813261 | 19 CHD6       |
| 3.62E-09   | 0.311460809 | 0.312 | 0.162 | 0.000116153 | 19 LINC00937  |
| 4.57E-05   | 0.311117474 | 0.312 | 0.207 | 1           | 19 ZNF337     |
| 0.00024205 | 0.310650982 | 0.472 | 0.376 | 1           | 19 FAR1       |
| 0.00044485 | 0.310627587 | 0.538 | 0.447 | 1           | 19 PHF14      |
| 4.44E-13   | 0.310476212 | 0.482 | 0.252 | 1.43E-08    | 19 COL27A1    |
| 4.01E-06   | 0.309999683 | 0.372 | 0.245 | 0.128908039 | 19 TDRP       |
| 0.00121916 | 0.309399341 | 0.256 | 0.181 | 1           | 19 ESRP1      |
| 7.33E-07   | 0.307796774 | 0.357 | 0.225 | 0.023549118 | 19 AC005562.1 |
| 4.27E-06   | 0.306980767 | 0.347 | 0.225 | 0.137033785 | 19 PURA       |
| 5.67E-07   | 0.306685179 | 0.884 | 0.757 | 0.018206681 | 19 VPS13B     |
| 0.00026882 | 0.306389933 | 0.291 | 0.196 | 1           | 19 PRDX6-AS1  |
| 0.00031554 | 0.306038829 | 0.387 | 0.302 | 1           | 19 AC127502.1 |
| 2.44E-09   | 0.305997591 | 0.266 | 0.129 | 7.84E-05    | 19 HS6ST1     |
| 4.59E-05   | 0.3059165   | 0.638 | 0.513 | 1           | 19 DENND1B    |
| 6.23E-08   | 0.305727879 | 0.382 | 0.228 | 0.002002225 | 19 CAP2       |
| 2.63E-06   | 0.305133514 | 0.673 | 0.532 | 0.084434744 | 19 TRA2A      |
| 7.47E-10   | 0.304763525 | 0.563 | 0.357 | 2.40E-05    | 19 SRGAP1     |
| 7.79E-05   | 0.304349758 | 0.683 | 0.571 | 1           | 19 RABGAP1    |
| 1.02E-06   | 0.304296458 | 0.648 | 0.487 | 0.03289056  | 19 SHLD2      |
| 1.91E-05   | 0.304276492 | 0.417 | 0.305 | 0.614174592 | 19 CRYZ       |
| 2.15E-08   | 0.30420436  | 0.417 | 0.254 | 0.000689865 | 19 PARP8      |
| 3.45E-05   | 0.304067615 | 0.447 | 0.322 | 1           | 19 PER3       |
| 0.00318259 | 0.303865532 | 0.492 | 0.432 | 1           | 19 MCPH1      |
| 1.20E-05   | 0.303682796 | 0.508 | 0.388 | 0.386865166 | 19 FCHO2      |
| 9.28E-06   | 0.303564466 | 0.447 | 0.317 | 0.298003157 | 19 SRP54      |
| 0.00012295 | 0.303229094 | 0.588 | 0.485 | 1           | 19 XRCC5      |
| 1.53E-05   | 0.302525416 | 0.714 | 0.574 | 0.491612979 | 19 CNKSR3     |
| 0.00079922 | 0.302166488 | 0.347 | 0.266 | 1           | 19 RNF216P1   |
| 0.00013195 | 0.301079975 | 0.392 | 0.277 | 1           | 19 LINC01572  |
| 1.35E-05   | 0.300674567 | 0.407 | 0.284 | 0.432647736 | 19 HOOK1      |
| 2.98E-06   | 0.300596661 | 0.372 | 0.254 | 0.095724066 | 19 SNAPC3     |
| 7.79E-07   | 0.299903634 | 0.477 | 0.32  | 0.02502743  | 19 MBOAT2     |
| 3.14E-08   | 0.299708779 | 0.975 | 0.919 | 0.001009588 | 19 FTX        |
| 8.94E-07   | 0.299654663 | 0.553 | 0.422 | 0.028720636 | 19 FUBP1      |
| 1.13E-06   | 0.299177209 | 0.598 | 0.459 | 0.036330899 | 19 AL669831.3 |
| 0.0014475  | 0.298986594 | 0.472 | 0.384 | 1           | 19 AC004160.1 |
| 0.00054843 | 0.298671546 | 0.432 | 0.335 | 1           | 19 GLUD1      |
| 0.00983991 | 0.298631621 | 0.357 | 0.292 | 1           | 19 QSER1      |
| 4.04E-08   | 0.298229345 | 0.261 | 0.132 | 0.001298679 | 19 MIS18BP1   |
| 0.00030055 | 0.298052443 | 0.578 | 0.476 | 1           | 19 ATE1       |
| 9.28E-05   | 0.297397148 | 0.281 | 0.19  | 1           | 19 STAG3L2    |
| 8.04E-06   | 0.296801018 | 0.392 | 0.269 | 0.258288036 | 19 AP002495.1 |
| 2.39E-06   | 0.296341064 | 0.276 | 0.165 | 0.076844503 | 19 STMP1      |
| 8.84E-09   | 0.296038188 | 0.462 | 0.264 | 0.000283992 | 19 Z93403.1   |
| 2.39E-05   | 0.295979833 | 0.422 | 0.305 | 0.767960637 | 19 MBD2       |
| 1.58E-11   | 0.295564897 | 0.859 | 0.552 | 5.06E-07    | 19 ZBTB16     |
| 1.34E-07   | 0.295306666 | 0.276 | 0.149 | 0.004291661 | 19 SLC37A1    |
| 1.82E-08   | 0.295179447 | 0.387 | 0.227 | 0.000584666 | 19 AC019257.8 |
| 0.00141312 | 0.295138852 | 0.427 | 0.348 | 1           | 19 ACVR1B     |

|            |             |       |       |             |                 |
|------------|-------------|-------|-------|-------------|-----------------|
| 3.70E-06   | 0.295135088 | 0.327 | 0.206 | 0.118736762 | 19 VSIG10       |
| 0.0012733  | 0.294827882 | 0.251 | 0.179 | 1           | 19 ATG4C        |
| 0.00124861 | 0.293887622 | 0.608 | 0.525 | 1           | 19 EFCAB13      |
| 0.00171328 | 0.293676328 | 0.472 | 0.398 | 1           | 19 MTREX        |
| 5.72E-18   | 0.293340686 | 0.357 | 0.137 | 1.84E-13    | 19 AKAP12       |
| 2.21E-05   | 0.293215646 | 0.392 | 0.274 | 0.710127078 | 19 MTMR2        |
| 1.10E-07   | 0.293005664 | 0.317 | 0.179 | 0.00352826  | 19 AC092329.3   |
| 4.58E-05   | 0.292959964 | 0.573 | 0.444 | 1           | 19 CHD7         |
| 2.09E-06   | 0.292753272 | 0.482 | 0.346 | 0.067107842 | 19 ARAP2        |
| 0.0002929  | 0.292719832 | 0.543 | 0.435 | 1           | 19 C1QTNF3-AMAC |
| 6.32E-06   | 0.292699694 | 0.804 | 0.687 | 0.203013484 | 19 TRIO         |
| 0.00016298 | 0.292610236 | 0.457 | 0.361 | 1           | 19 MDN1         |
| 0.00087448 | 0.292579488 | 0.462 | 0.376 | 1           | 19 PIGN         |
| 9.76E-07   | 0.292526332 | 0.638 | 0.504 | 0.031332104 | 19 NBPF14       |
| 6.80E-05   | 0.292447805 | 0.357 | 0.253 | 1           | 19 ARMC9        |
| 8.77E-09   | 0.292096366 | 0.256 | 0.125 | 0.000281802 | 19 PAXIP1-AS2   |
| 6.96E-07   | 0.291941847 | 0.307 | 0.18  | 0.022343589 | 19 TMEM106B     |
| 0.00224862 | 0.291927247 | 0.276 | 0.206 | 1           | 19 EIF2AK4      |
| 7.31E-06   | 0.291137076 | 0.508 | 0.375 | 0.234775245 | 19 RAD9A        |
| 2.28E-05   | 0.290328965 | 0.337 | 0.228 | 0.731619705 | 19 POLE2        |
| 1.69E-09   | 0.290204138 | 0.804 | 0.589 | 5.42E-05    | 19 PTPRJ        |
| 4.32E-06   | 0.289521945 | 0.417 | 0.278 | 0.138624974 | 19 ITGB3BP      |
| 3.15E-05   | 0.28908063  | 0.347 | 0.23  | 1           | 19 MAMDC2-AS1   |
| 2.26E-08   | 0.288778475 | 0.809 | 0.634 | 0.000727091 | 19 SCMHI        |
| 4.00E-05   | 0.28871039  | 0.457 | 0.337 | 1           | 19 KLHL28       |
| 8.79E-06   | 0.288280794 | 0.538 | 0.419 | 0.282199647 | 19 SMG1P2       |
| 8.32E-06   | 0.288034426 | 0.387 | 0.264 | 0.267065558 | 19 AC009554.1   |
| 4.02E-05   | 0.288007371 | 0.543 | 0.415 | 1           | 19 WARS2-AS1    |
| 6.55E-07   | 0.287405061 | 0.281 | 0.16  | 0.02102681  | 19 ASAH1        |
| 1.72E-06   | 0.287256739 | 0.583 | 0.422 | 0.055084778 | 19 TPTE2P5      |
| 0.00019365 | 0.287021551 | 0.508 | 0.404 | 1           | 19 URI1         |
| 3.09E-06   | 0.286768045 | 0.633 | 0.488 | 0.099256577 | 19 NSD3         |
| 4.26E-05   | 0.285997604 | 0.794 | 0.638 | 1           | 19 USP25        |
| 5.94E-06   | 0.285380509 | 0.427 | 0.3   | 0.190797523 | 19 CLK4         |
| 5.93E-07   | 0.285353375 | 0.864 | 0.771 | 0.019036697 | 19 NPIP5        |
| 2.62E-05   | 0.284758054 | 0.573 | 0.444 | 0.842313776 | 19 CEP95        |
| 0.00129372 | 0.284607384 | 0.462 | 0.382 | 1           | 19 KLHDC10      |
| 5.25E-06   | 0.284436373 | 0.327 | 0.206 | 0.168770695 | 19 PTPRS        |
| 6.53E-07   | 0.284258687 | 0.714 | 0.581 | 0.02096025  | 19 PIAS1        |
| 0.00040593 | 0.284244395 | 0.382 | 0.286 | 1           | 19 STX17        |
| 5.10E-05   | 0.283977971 | 0.633 | 0.512 | 1           | 19 RB1          |
| 2.56E-05   | 0.283931014 | 0.271 | 0.17  | 0.823607714 | 19 NME5         |
| 1.06E-07   | 0.283842293 | 0.266 | 0.139 | 0.003403094 | 19 CCDC40       |
| 1.02E-06   | 0.283549517 | 0.724 | 0.582 | 0.032713359 | 19 SCAF11       |
| 0.00072147 | 0.282715006 | 0.457 | 0.372 | 1           | 19 FAM185A      |
| 1.11E-08   | 0.28269637  | 0.312 | 0.164 | 0.000357677 | 19 ANKDD1B      |
| 0.00010874 | 0.282629674 | 0.256 | 0.165 | 1           | 19 MACROH2A1    |
| 7.15E-05   | 0.282350488 | 0.337 | 0.231 | 1           | 19 GTF3C1       |
| 0.00022306 | 0.282144028 | 0.402 | 0.309 | 1           | 19 EPG5         |
| 0.00202116 | 0.28203183  | 0.437 | 0.359 | 1           | 19 WASL         |
| 3.92E-06   | 0.282020332 | 0.678 | 0.51  | 0.126009352 | 19 FXD2         |

|            |             |       |       |             |               |
|------------|-------------|-------|-------|-------------|---------------|
| 0.00010549 | 0.281940127 | 0.312 | 0.212 | 1           | 19 RAB12      |
| 7.42E-07   | 0.281878028 | 0.332 | 0.204 | 0.023828675 | 19 SMG1P7     |
| 0.00518129 | 0.281307608 | 0.377 | 0.297 | 1           | 19 MAL        |
| 3.86E-07   | 0.281124374 | 0.472 | 0.316 | 0.012405544 | 19 MYOF       |
| 1.15E-11   | 0.280926153 | 0.487 | 0.26  | 3.69E-07    | 19 TNIK       |
| 1.52E-06   | 0.280644599 | 0.296 | 0.173 | 0.048871472 | 19 LINC00467  |
| 0.00102671 | 0.280126576 | 0.337 | 0.252 | 1           | 19 SIMC1      |
| 0.00043155 | 0.280025034 | 0.402 | 0.307 | 1           | 19 ASCC1      |
| 1.66E-07   | 0.279726411 | 0.754 | 0.544 | 0.005342    | 19 CTDSPL     |
| 0.00036118 | 0.279458811 | 0.266 | 0.18  | 1           | 19 AC048341.1 |
| 1.90E-06   | 0.27922141  | 0.332 | 0.198 | 0.060976466 | 19 LINC01006  |
| 0.00025038 | 0.278811764 | 0.327 | 0.227 | 1           | 19 NUP155     |
| 8.55E-07   | 0.278480235 | 0.312 | 0.185 | 0.02745945  | 19 ZMYM1      |
| 2.82E-05   | 0.278330996 | 0.568 | 0.444 | 0.90513162  | 19 SVIL-AS1   |
| 0.00133439 | 0.278230821 | 0.442 | 0.347 | 1           | 19 TRIM24     |
| 0.00049511 | 0.276646551 | 0.377 | 0.28  | 1           | 19 ZNF431     |
| 5.91E-05   | 0.276373075 | 0.508 | 0.387 | 1           | 19 FBXO42     |
| 6.83E-05   | 0.276157327 | 0.457 | 0.345 | 1           | 19 TTN        |
| 2.81E-05   | 0.275654109 | 0.658 | 0.542 | 0.901595629 | 19 HECTD4     |
| 2.52E-10   | 0.275547455 | 0.276 | 0.125 | 8.09E-06    | 19 SLC6A12    |
| 0.00015203 | 0.275204128 | 0.377 | 0.275 | 1           | 19 LINC00472  |
| 0.00210505 | 0.275187372 | 0.598 | 0.505 | 1           | 19 TRIM2      |
| 0.00033053 | 0.275110886 | 0.302 | 0.208 | 1           | 19 ARL13B     |
| 9.93E-05   | 0.274077846 | 0.402 | 0.292 | 1           | 19 FAM149B1   |
| 0.00010254 | 0.273907841 | 0.276 | 0.182 | 1           | 19 GOLPH3L    |
| 0.00049624 | 0.273642017 | 0.372 | 0.276 | 1           | 19 ZNF737     |
| 5.21E-06   | 0.273002732 | 0.317 | 0.195 | 0.16727196  | 19 G3BP2      |
| 2.33E-05   | 0.27271642  | 0.302 | 0.191 | 0.748194006 | 19 ENAH       |
| 0.00011776 | 0.27212891  | 0.382 | 0.284 | 1           | 19 LINC00630  |
| 9.56E-06   | 0.271799159 | 0.714 | 0.579 | 0.307188266 | 19 SPIN1      |
| 8.68E-13   | 0.271511554 | 0.261 | 0.106 | 2.79E-08    | 19 PLAAT3     |
| 0.00155759 | 0.270722041 | 0.613 | 0.5   | 1           | 19 UMAD1      |
| 1.93E-05   | 0.270538395 | 0.492 | 0.371 | 0.619134229 | 19 CCNC       |
| 1.24E-05   | 0.269986373 | 0.678 | 0.539 | 0.397745351 | 19 ZHX2       |
| 4.40E-08   | 0.269750683 | 0.266 | 0.134 | 0.001413214 | 19 JUNB       |
| 0.00032563 | 0.269264216 | 0.312 | 0.225 | 1           | 19 PSMA3      |
| 2.32E-05   | 0.269103342 | 0.709 | 0.584 | 0.746487722 | 19 SRSF11     |
| 0.00036498 | 0.268148631 | 0.482 | 0.384 | 1           | 19 TCERG1     |
| 0.00010222 | 0.268103349 | 0.432 | 0.323 | 1           | 19 ALG13      |
| 1.35E-05   | 0.268030135 | 0.392 | 0.266 | 0.432082069 | 19 ZNF251     |
| 0.00047836 | 0.267635581 | 0.337 | 0.246 | 1           | 19 SPOPL      |
| 0.00032877 | 0.267617639 | 0.312 | 0.223 | 1           | 19 KLHDC1     |
| 0.00221212 | 0.267546225 | 0.387 | 0.291 | 1           | 19 ZSWIM5     |
| 0.00173696 | 0.267029358 | 0.452 | 0.373 | 1           | 19 TANK       |
| 6.79E-06   | 0.266399212 | 0.291 | 0.178 | 0.218122765 | 19 IFNAR1     |
| 6.67E-06   | 0.266342418 | 0.352 | 0.225 | 0.214339482 | 19 EFHC1      |
| 4.30E-05   | 0.266171583 | 0.276 | 0.177 | 1           | 19 SCRNI      |
| 4.93E-06   | 0.266023434 | 0.327 | 0.206 | 0.15841425  | 19 RILPL1     |
| 6.62E-06   | 0.265769298 | 0.744 | 0.617 | 0.212755677 | 19 NRXN1      |
| 0.00086557 | 0.265302281 | 0.472 | 0.379 | 1           | 19 ABL2       |
| 8.67E-09   | 0.265142982 | 0.362 | 0.197 | 0.000278514 | 19 GPR155     |

|            |             |       |       |             |                 |
|------------|-------------|-------|-------|-------------|-----------------|
| 1.93E-05   | 0.264900276 | 0.538 | 0.403 | 0.618392364 | 19 STX7         |
| 0.00081394 | 0.264557599 | 0.442 | 0.345 | 1           | 19 NDFIP1       |
| 0.0026502  | 0.264192813 | 0.291 | 0.219 | 1           | 19 UBXXN2B      |
| 0.004549   | 0.264077713 | 0.266 | 0.2   | 1           | 19 VPS4B        |
| 2.29E-05   | 0.263875876 | 0.779 | 0.658 | 0.735028412 | 19 KMT2E        |
| 1.51E-06   | 0.26375691  | 0.432 | 0.288 | 0.048577224 | 19 MSANTD2      |
| 2.08E-06   | 0.263442198 | 0.834 | 0.69  | 0.066889261 | 19 NUMB         |
| 2.41E-05   | 0.263409998 | 0.276 | 0.17  | 0.774558433 | 19 TRMT44       |
| 5.94E-05   | 0.26319539  | 0.523 | 0.416 | 1           | 19 KMT5B        |
| 0.00045357 | 0.262969419 | 0.513 | 0.408 | 1           | 19 ORC4         |
| 0.0001124  | 0.262370649 | 0.276 | 0.176 | 1           | 19 RPP38        |
| 4.10E-06   | 0.262293601 | 0.256 | 0.148 | 0.131525887 | 19 SPATA6L      |
| 0.00472363 | 0.262197525 | 0.367 | 0.301 | 1           | 19 FZD6         |
| 3.61E-06   | 0.262179976 | 0.291 | 0.173 | 0.115919461 | 19 SNX7         |
| 1.09E-07   | 0.262176083 | 0.759 | 0.595 | 0.003498528 | 19 VPS13A       |
| 4.29E-05   | 0.262105309 | 0.281 | 0.177 | 1           | 19 RASSF6       |
| 3.69E-06   | 0.26209686  | 0.312 | 0.186 | 0.118559625 | 19 OR7E14P      |
| 0.00092807 | 0.261998107 | 0.327 | 0.241 | 1           | 19 ZNF138       |
| 2.95E-05   | 0.261964438 | 0.281 | 0.179 | 0.948773147 | 19 LINC01347    |
| 0.00862452 | 0.261536836 | 0.397 | 0.333 | 1           | 19 CFAP221      |
| 9.38E-05   | 0.2613941   | 0.668 | 0.551 | 1           | 19 NUTM2A-AS1   |
| 2.52E-08   | 0.261202462 | 0.643 | 0.465 | 0.000809202 | 19 ANKRD36B     |
| 0.00458283 | 0.261179081 | 0.603 | 0.52  | 1           | 19 DNAJC1       |
| 3.10E-05   | 0.261140759 | 0.281 | 0.173 | 0.995406666 | 19 TSPAN12      |
| 0.00207897 | 0.261072881 | 0.397 | 0.319 | 1           | 19 METTL16      |
| 2.19E-06   | 0.260910043 | 0.563 | 0.379 | 0.070187807 | 19 PTPRD        |
| 0.00987521 | 0.260663151 | 0.276 | 0.216 | 1           | 19 BLOC1S5-TXND |
| 0.00352333 | 0.260006258 | 0.337 | 0.266 | 1           | 19 HBS1L        |
| 0.001933   | 0.259859209 | 0.317 | 0.237 | 1           | 19 POT1         |
| 0.00037668 | 0.25968846  | 0.538 | 0.431 | 1           | 19 ANKUB1       |
| 2.51E-07   | 0.259463417 | 0.256 | 0.134 | 0.008062039 | 19 SLC12A9      |
| 5.81E-06   | 0.259407014 | 0.276 | 0.165 | 0.186606607 | 19 PRMT7        |
| 0.00021751 | 0.2593972   | 0.749 | 0.637 | 1           | 19 PUM2         |
| 3.53E-21   | 0.259274187 | 0.995 | 0.884 | 1.13E-16    | 19 MAGI1        |
| 0.00062826 | 0.259166645 | 0.322 | 0.234 | 1           | 19 CDRT4        |
| 8.03E-06   | 0.258825072 | 0.342 | 0.221 | 0.257896622 | 19 N4BP2        |
| 0.00070908 | 0.258638689 | 0.492 | 0.396 | 1           | 19 MPP5         |
| 2.57E-06   | 0.258585629 | 0.261 | 0.15  | 0.082525279 | 19 SIAE         |
| 6.70E-09   | 0.257890621 | 0.342 | 0.188 | 0.000215039 | 19 NPIP2B       |
| 0.00192105 | 0.257323856 | 0.472 | 0.405 | 1           | 19 GTF2IRD2     |
| 0.0001494  | 0.25700606  | 0.568 | 0.451 | 1           | 19 SPECC1L      |
| 0.00012513 | 0.256775007 | 0.291 | 0.193 | 1           | 19 AC090360.1   |
| 2.49E-06   | 0.256650715 | 0.729 | 0.564 | 0.08006043  | 19 FNIP2        |
| 0.00159848 | 0.256326545 | 0.457 | 0.369 | 1           | 19 ENSA         |
| 0.00154874 | 0.255924209 | 0.261 | 0.187 | 1           | 19 CUTC         |
| 0.00082875 | 0.255563192 | 0.302 | 0.213 | 1           | 19 MRE11        |
| 0.0022243  | 0.255422362 | 0.332 | 0.257 | 1           | 19 CR382285.1   |
| 8.47E-07   | 0.255256243 | 0.744 | 0.597 | 0.027207995 | 19 ENOSF1       |
| 2.53E-05   | 0.255165109 | 0.523 | 0.407 | 0.811770856 | 19 ATG2B        |
| 0.00048131 | 0.254990866 | 0.854 | 0.811 | 1           | 19 PRH1         |
| 0.00012098 | 0.25444134  | 0.342 | 0.243 | 1           | 19 XPNPEP3      |

|            |             |       |       |             |               |
|------------|-------------|-------|-------|-------------|---------------|
| 0.0001038  | 0.254391148 | 0.462 | 0.347 | 1           | 19 SEC63      |
| 0.00036058 | 0.254091171 | 0.362 | 0.275 | 1           | 19 KHDC4      |
| 9.39E-05   | 0.253979058 | 0.327 | 0.221 | 1           | 19 TTC12      |
| 4.08E-05   | 0.25360912  | 0.302 | 0.198 | 1           | 19 GATAD1     |
| 0.00110694 | 0.253444221 | 0.533 | 0.43  | 1           | 19 SMURF2     |
| 1.36E-06   | 0.253234313 | 0.251 | 0.139 | 0.043817609 | 19 TUB        |
| 2.49E-07   | 0.252349176 | 0.342 | 0.198 | 0.007989745 | 19 SLC15A2    |
| 0.00117329 | 0.252305871 | 0.291 | 0.207 | 1           | 19 SP4        |
| 8.46E-07   | 0.25190474  | 0.281 | 0.159 | 0.027176333 | 19 AL732372.2 |
| 3.73E-05   | 0.25177945  | 0.251 | 0.153 | 1           | 19 ZNF627     |
| 0.00010227 | 0.251639956 | 0.558 | 0.426 | 1           | 19 ANO10      |
| 4.54E-05   | 0.251493961 | 0.744 | 0.648 | 1           | 19 SMG1       |
| 1.71E-06   | 0.251253973 | 0.653 | 0.489 | 0.054849462 | 19 CCDC30     |
| 0.0008518  | 0.250793411 | 0.548 | 0.44  | 1           | 19 TOM1L1     |
| 0.00372692 | 0.250722087 | 0.683 | 0.582 | 1           | 19 VAV3       |
| 0.00408728 | 0.25045626  | 0.548 | 0.46  | 1           | 19 TMEM135    |
| 0.00363944 | 0.250336609 | 0.467 | 0.385 | 1           | 19 TMEM14B    |
| 1.50E-06   | 0.250145389 | 0.372 | 0.223 | 0.048044386 | 19 FGF14      |
| 2.85E-62   | 1.628185286 | 0.761 | 0.14  | 9.16E-58    | 20 SCNN1G     |
| 3.75E-28   | 1.56290824  | 0.943 | 0.502 | 1.21E-23    | 20 SLC8A1     |
| 5.15E-23   | 1.559272014 | 0.636 | 0.227 | 1.65E-18    | 20 SNTG1      |
| 6.41E-37   | 1.508094001 | 0.818 | 0.251 | 2.06E-32    | 20 LINC01098  |
| 9.80E-30   | 1.426649573 | 1     | 0.694 | 3.15E-25    | 20 CADPS2     |
| 2.15E-38   | 1.408230957 | 0.75  | 0.196 | 6.89E-34    | 20 PWRN1      |
| 1.46E-32   | 1.381109933 | 0.443 | 0.089 | 4.68E-28    | 20 PRPS2      |
| 8.94E-28   | 1.350053282 | 0.602 | 0.168 | 2.87E-23    | 20 EYA4       |
| 1.55E-13   | 1.323613154 | 0.284 | 0.076 | 4.99E-09    | 20 AC092691.1 |
| 1.87E-45   | 1.322276926 | 0.614 | 0.122 | 6.00E-41    | 20 SLC9A4     |
| 2.34E-31   | 1.297136286 | 0.909 | 0.349 | 7.52E-27    | 20 BMPR1B     |
| 2.11E-22   | 1.296982542 | 0.966 | 0.575 | 6.79E-18    | 20 RALYL      |
| 2.94E-36   | 1.278124948 | 0.705 | 0.188 | 9.45E-32    | 20 HUNK       |
| 1.76E-25   | 1.273976985 | 0.83  | 0.325 | 5.67E-21    | 20 SLC8A1-AS1 |
| 2.89E-27   | 1.222922508 | 1     | 0.612 | 9.27E-23    | 20 TRPM3      |
| 1.98E-26   | 1.192138544 | 0.591 | 0.17  | 6.37E-22    | 20 KCNIP1     |
| 1.07E-29   | 1.155027391 | 0.943 | 0.38  | 3.42E-25    | 20 SOX5       |
| 3.37E-22   | 1.15387187  | 0.943 | 0.487 | 1.08E-17    | 20 TOX3       |
| 2.71E-25   | 1.15127096  | 0.841 | 0.32  | 8.71E-21    | 20 FAM110B    |
| 6.62E-12   | 1.141705625 | 0.466 | 0.194 | 2.12E-07    | 20 ZNF331     |
| 4.22E-28   | 1.137306612 | 0.648 | 0.199 | 1.36E-23    | 20 ARG2       |
| 6.16E-16   | 1.132462233 | 0.92  | 0.655 | 1.98E-11    | 20 RAD51B     |
| 1.42E-21   | 1.121813114 | 0.909 | 0.431 | 4.57E-17    | 20 TMTC2      |
| 4.34E-16   | 1.121760376 | 0.682 | 0.31  | 1.40E-11    | 20 ATP1B3     |
| 7.07E-17   | 1.119423694 | 0.943 | 0.682 | 2.27E-12    | 20 NFE2L2     |
| 9.75E-21   | 1.114420154 | 0.977 | 0.709 | 3.13E-16    | 20 FRAS1      |
| 7.64E-28   | 1.08797194  | 0.784 | 0.286 | 2.45E-23    | 20 RALBP1     |
| 1.86E-42   | 1.06997108  | 0.318 | 0.037 | 5.97E-38    | 20 AC087379.2 |
| 5.35E-22   | 1.06979187  | 0.977 | 0.551 | 1.72E-17    | 20 GRIP1      |
| 7.24E-26   | 1.052002692 | 0.977 | 0.418 | 2.33E-21    | 20 PIK3C2G    |
| 2.23E-25   | 1.048998697 | 0.966 | 0.501 | 7.16E-21    | 20 EYA3       |
| 9.62E-21   | 1.031477617 | 1     | 0.765 | 3.09E-16    | 20 AC019197.1 |
| 2.12E-30   | 1.018050919 | 0.83  | 0.278 | 6.81E-26    | 20 NRCAM      |

|          |             |       |       |          |               |
|----------|-------------|-------|-------|----------|---------------|
| 5.73E-35 | 1.009208326 | 0.523 | 0.108 | 1.84E-30 | 20 SCNN1B     |
| 8.30E-27 | 1.005335915 | 1     | 0.974 | 2.67E-22 | 20 PDE4D      |
| 3.72E-24 | 0.997744811 | 0.67  | 0.238 | 1.19E-19 | 20 VEPH1      |
| 2.33E-22 | 0.993624752 | 0.818 | 0.348 | 7.49E-18 | 20 SLC38A1    |
| 1.83E-22 | 0.991091124 | 0.886 | 0.438 | 5.87E-18 | 20 HSD11B2    |
| 2.59E-15 | 0.98447606  | 0.875 | 0.524 | 8.31E-11 | 20 PTBP3      |
| 8.12E-26 | 0.979141478 | 0.955 | 0.387 | 2.61E-21 | 20 KCNJ15     |
| 7.46E-16 | 0.971151368 | 1     | 0.825 | 2.40E-11 | 20 COBLL1     |
| 8.92E-21 | 0.965093652 | 0.807 | 0.379 | 2.86E-16 | 20 CRYBG1     |
| 5.27E-35 | 0.963163895 | 0.864 | 0.247 | 1.69E-30 | 20 MIOX       |
| 1.82E-21 | 0.94578353  | 0.943 | 0.455 | 5.84E-17 | 20 TEX41      |
| 1.16E-17 | 0.943034001 | 0.83  | 0.447 | 3.72E-13 | 20 C11orf80   |
| 4.60E-21 | 0.941786468 | 0.818 | 0.356 | 1.48E-16 | 20 SGPP1      |
| 2.95E-18 | 0.915805786 | 0.511 | 0.171 | 9.49E-14 | 20 TMEM178A   |
| 3.76E-17 | 0.912781962 | 0.784 | 0.376 | 1.21E-12 | 20 VAV2       |
| 4.98E-18 | 0.910527309 | 0.727 | 0.319 | 1.60E-13 | 20 SLC45A4    |
| 6.74E-20 | 0.903648547 | 0.966 | 0.599 | 2.17E-15 | 20 PRKAG2     |
| 2.31E-16 | 0.892342231 | 0.409 | 0.124 | 7.43E-12 | 20 AC044810.3 |
| 6.60E-35 | 0.891326661 | 0.75  | 0.205 | 2.12E-30 | 20 APCDD1L-DT |
| 1.79E-20 | 0.887376465 | 0.898 | 0.411 | 5.76E-16 | 20 MPPED2     |
| 2.02E-26 | 0.885419517 | 0.682 | 0.215 | 6.50E-22 | 20 CALB1      |
| 1.17E-21 | 0.882589689 | 0.693 | 0.262 | 3.74E-17 | 20 AC022414.1 |
| 1.07E-14 | 0.878803547 | 1     | 0.771 | 3.44E-10 | 20 AFF1       |
| 2.36E-26 | 0.87284443  | 0.773 | 0.261 | 7.58E-22 | 20 PDE3B      |
| 5.92E-19 | 0.871286099 | 0.977 | 0.573 | 1.90E-14 | 20 DCDC2      |
| 6.88E-14 | 0.859663614 | 0.886 | 0.542 | 2.21E-09 | 20 ABTB2      |
| 9.21E-16 | 0.850986034 | 0.807 | 0.413 | 2.96E-11 | 20 CDK6       |
| 6.01E-24 | 0.84884818  | 0.636 | 0.199 | 1.93E-19 | 20 GATA3      |
| 3.33E-19 | 0.845098654 | 0.989 | 0.786 | 1.07E-14 | 20 GLIS3      |
| 3.06E-16 | 0.833883831 | 0.761 | 0.362 | 9.82E-12 | 20 STIM2      |
| 3.06E-11 | 0.826105725 | 0.761 | 0.414 | 9.83E-07 | 20 SCIN       |
| 2.21E-14 | 0.822946387 | 0.92  | 0.555 | 7.11E-10 | 20 STARD13    |
| 1.36E-24 | 0.812736307 | 0.545 | 0.152 | 4.35E-20 | 20 PLCZ1      |
| 7.54E-18 | 0.809425048 | 0.989 | 0.583 | 2.42E-13 | 20 LAMB1      |
| 2.16E-14 | 0.80367324  | 0.386 | 0.123 | 6.93E-10 | 20 SLC9A2     |
| 4.41E-25 | 0.801745289 | 0.477 | 0.116 | 1.42E-20 | 20 KCNK13     |
| 1.14E-13 | 0.795740578 | 1     | 0.794 | 3.65E-09 | 20 RBPMS      |
| 6.54E-20 | 0.791187531 | 0.625 | 0.221 | 2.10E-15 | 20 RIMBP2     |
| 2.35E-13 | 0.774099336 | 0.932 | 0.626 | 7.55E-09 | 20 GAREM1     |
| 7.84E-14 | 0.770728597 | 0.966 | 0.711 | 2.52E-09 | 20 ERC1       |
| 5.31E-14 | 0.769091377 | 0.909 | 0.557 | 1.71E-09 | 20 STK33      |
| 3.46E-15 | 0.755527827 | 0.511 | 0.194 | 1.11E-10 | 20 IQUB       |
| 1.66E-14 | 0.751908822 | 0.943 | 0.563 | 5.32E-10 | 20 MYO1E      |
| 4.89E-16 | 0.74998476  | 1     | 0.777 | 1.57E-11 | 20 ARL15      |
| 1.26E-27 | 0.740516559 | 0.636 | 0.178 | 4.04E-23 | 20 SLC7A1     |
| 2.49E-38 | 0.7357038   | 0.807 | 0.204 | 8.00E-34 | 20 AFM        |
| 1.84E-15 | 0.731310938 | 0.977 | 0.626 | 5.91E-11 | 20 PRKG1      |
| 8.06E-12 | 0.72889537  | 0.466 | 0.183 | 2.59E-07 | 20 ZC3HAV1    |
| 4.53E-15 | 0.725254518 | 0.67  | 0.29  | 1.45E-10 | 20 ADAM22     |
| 2.12E-25 | 0.725226966 | 0.455 | 0.107 | 6.82E-21 | 20 AL512662.1 |
| 2.96E-19 | 0.723820863 | 0.557 | 0.181 | 9.50E-15 | 20 AC011586.1 |



|            |             |       |       |             |               |
|------------|-------------|-------|-------|-------------|---------------|
| 2.51E-15   | 0.722921892 | 0.909 | 0.458 | 8.06E-11    | 20 SCN2A      |
| 0.00023683 | 0.717907149 | 0.307 | 0.166 | 1           | 20 SGCD       |
| 6.62E-15   | 0.709931329 | 0.636 | 0.261 | 2.13E-10    | 20 MSR1       |
| 1.22E-09   | 0.709456117 | 0.568 | 0.287 | 3.93E-05    | 20 MID1       |
| 7.02E-23   | 0.707922805 | 0.443 | 0.109 | 2.26E-18    | 20 HMGCS2     |
| 5.26E-13   | 0.70395053  | 0.466 | 0.166 | 1.69E-08    | 20 LINC01482  |
| 5.26E-14   | 0.703166574 | 0.716 | 0.348 | 1.69E-09    | 20 MAP3K21    |
| 1.77E-06   | 0.703010943 | 0.886 | 0.741 | 0.056910008 | 20 NFAT5      |
| 9.07E-18   | 0.696069644 | 0.716 | 0.278 | 2.91E-13    | 20 FYB2       |
| 7.83E-13   | 0.694128814 | 0.659 | 0.313 | 2.52E-08    | 20 KIZ        |
| 6.36E-10   | 0.693917093 | 0.625 | 0.308 | 2.04E-05    | 20 SUSD1      |
| 2.88E-12   | 0.690644289 | 0.886 | 0.534 | 9.26E-08    | 20 TLN2       |
| 6.45E-11   | 0.687245493 | 0.932 | 0.646 | 2.07E-06    | 20 FRG1HP     |
| 2.92E-21   | 0.684270107 | 0.648 | 0.22  | 9.38E-17    | 20 EML6       |
| 1.03E-16   | 0.67979108  | 0.534 | 0.186 | 3.31E-12    | 20 KCNS3      |
| 5.98E-14   | 0.679081739 | 0.727 | 0.351 | 1.92E-09    | 20 AC092944.1 |
| 2.12E-13   | 0.669572859 | 0.898 | 0.509 | 6.81E-09    | 20 TANC2      |
| 3.97E-18   | 0.665892617 | 0.443 | 0.129 | 1.28E-13    | 20 BARX2      |
| 7.20E-14   | 0.665422745 | 0.977 | 0.665 | 2.31E-09    | 20 PTPN13     |
| 1.52E-14   | 0.664074722 | 0.852 | 0.419 | 4.89E-10    | 20 LHFPL3     |
| 3.13E-17   | 0.663874285 | 0.648 | 0.254 | 1.01E-12    | 20 TRPV4      |
| 5.07E-15   | 0.663872379 | 0.727 | 0.322 | 1.63E-10    | 20 MACC1      |
| 5.21E-22   | 0.66204124  | 0.966 | 0.43  | 1.67E-17    | 20 SLC4A4     |
| 8.89E-12   | 0.66112874  | 0.773 | 0.421 | 2.86E-07    | 20 KCNQ1      |
| 4.60E-32   | 0.660366874 | 0.318 | 0.047 | 1.48E-27    | 20 SIRLNT     |
| 1.75E-15   | 0.653440827 | 0.318 | 0.082 | 5.63E-11    | 20 FXYD4      |
| 4.20E-14   | 0.65259729  | 0.864 | 0.436 | 1.35E-09    | 20 KCNJ3      |
| 9.84E-14   | 0.645620294 | 0.648 | 0.285 | 3.16E-09    | 20 PLEKHA2    |
| 3.55E-17   | 0.645458391 | 0.841 | 0.379 | 1.14E-12    | 20 GLDC       |
| 5.07E-11   | 0.642672354 | 0.705 | 0.378 | 1.63E-06    | 20 CDKL1      |
| 2.86E-19   | 0.640963576 | 0.386 | 0.098 | 9.20E-15    | 20 FGD3       |
| 3.30E-13   | 0.64057309  | 0.795 | 0.383 | 1.06E-08    | 20 PCDH9      |
| 1.66E-11   | 0.638666551 | 1     | 0.781 | 5.32E-07    | 20 MECOM      |
| 3.34E-11   | 0.635923574 | 0.909 | 0.588 | 1.07E-06    | 20 TRHDE      |
| 2.14E-13   | 0.632452695 | 0.432 | 0.145 | 6.86E-09    | 20 PCDH7      |
| 3.51E-15   | 0.629264168 | 0.943 | 0.588 | 1.13E-10    | 20 FGGY       |
| 9.18E-11   | 0.628215557 | 0.977 | 0.786 | 2.95E-06    | 20 BCAS3      |
| 2.30E-13   | 0.628053654 | 0.841 | 0.416 | 7.38E-09    | 20 FAM171A1   |
| 3.30E-12   | 0.62646709  | 0.784 | 0.417 | 1.06E-07    | 20 TMEM51     |
| 8.12E-14   | 0.626436885 | 0.545 | 0.218 | 2.61E-09    | 20 SYK        |
| 9.39E-32   | 0.62485648  | 0.864 | 0.251 | 3.02E-27    | 20 PRODH2     |
| 7.66E-17   | 0.623826956 | 0.614 | 0.227 | 2.46E-12    | 20 PRDM16-DT  |
| 2.88E-11   | 0.620160986 | 0.955 | 0.692 | 9.26E-07    | 20 FHOD3      |
| 8.45E-17   | 0.619628021 | 0.5   | 0.165 | 2.71E-12    | 20 AC011586.2 |
| 1.64E-15   | 0.616295248 | 0.42  | 0.129 | 5.26E-11    | 20 LINC01508  |
| 4.03E-11   | 0.613050277 | 0.455 | 0.18  | 1.30E-06    | 20 ANGPT1     |
| 1.47E-13   | 0.605911585 | 0.989 | 0.691 | 4.71E-09    | 20 AGBL4      |
| 2.58E-14   | 0.604820693 | 0.818 | 0.404 | 8.29E-10    | 20 MYO5A      |
| 1.82E-08   | 0.604783487 | 0.716 | 0.387 | 0.000585934 | 20 SIM1       |
| 5.53E-14   | 0.599859956 | 0.67  | 0.257 | 1.78E-09    | 20 XIST       |
| 3.59E-10   | 0.598482064 | 0.864 | 0.58  | 1.15E-05    | 20 ASAP2      |

|            |             |       |       |             |               |
|------------|-------------|-------|-------|-------------|---------------|
| 8.98E-10   | 0.597575583 | 0.602 | 0.306 | 2.88E-05    | 20 ABCB1      |
| 1.92E-10   | 0.593458947 | 1     | 0.792 | 6.16E-06    | 20 NR3C2      |
| 1.03E-13   | 0.59339061  | 0.432 | 0.149 | 3.32E-09    | 20 FAM81A     |
| 1.83E-22   | 0.589934387 | 0.341 | 0.071 | 5.89E-18    | 20 GATA2      |
| 6.27E-12   | 0.588732544 | 1     | 0.71  | 2.01E-07    | 20 DLG2       |
| 5.37E-10   | 0.585388374 | 0.739 | 0.407 | 1.73E-05    | 20 DPH6-DT    |
| 1.48E-38   | 0.584577973 | 0.295 | 0.035 | 4.76E-34    | 20 AC073172.1 |
| 1.97E-16   | 0.58393809  | 0.636 | 0.25  | 6.34E-12    | 20 FAM20C     |
| 2.66E-13   | 0.583320594 | 0.432 | 0.155 | 8.54E-09    | 20 RDH10      |
| 2.84E-31   | 0.582356659 | 0.591 | 0.137 | 9.14E-27    | 20 ADGRG5     |
| 1.21E-08   | 0.582000019 | 0.852 | 0.507 | 0.000389544 | 20 LRP1B      |
| 2.78E-08   | 0.580197817 | 0.375 | 0.162 | 0.000894385 | 20 PAPSS2     |
| 0.00061451 | 0.576817781 | 0.364 | 0.217 | 1           | 20 LSAMP      |
| 5.50E-12   | 0.576255021 | 0.943 | 0.522 | 1.77E-07    | 20 FREM1      |
| 2.23E-18   | 0.575813698 | 0.705 | 0.281 | 7.16E-14    | 20 PTGR1      |
| 5.43E-22   | 0.574877322 | 0.568 | 0.168 | 1.74E-17    | 20 TPM4       |
| 0.00025034 | 0.570118854 | 0.409 | 0.244 | 1           | 20 USP36      |
| 1.23E-09   | 0.569650507 | 0.364 | 0.138 | 3.94E-05    | 20 IL1RAPL1   |
| 1.34E-19   | 0.569451814 | 0.398 | 0.1   | 4.29E-15    | 20 ROR2       |
| 1.06E-13   | 0.568554177 | 0.648 | 0.283 | 3.40E-09    | 20 CSRNP3     |
| 3.16E-21   | 0.562675324 | 0.375 | 0.09  | 1.02E-16    | 20 GMNN       |
| 9.19E-17   | 0.560950898 | 0.398 | 0.113 | 2.95E-12    | 20 CWH43      |
| 5.53E-12   | 0.55799544  | 0.739 | 0.376 | 1.78E-07    | 20 BCAR3      |
| 2.54E-15   | 0.555110792 | 0.625 | 0.242 | 8.17E-11    | 20 EMX1       |
| 2.13E-12   | 0.553349938 | 0.966 | 0.665 | 6.84E-08    | 20 PAX8-AS1   |
| 3.55E-09   | 0.54996565  | 0.83  | 0.483 | 0.000114104 | 20 GALNT18    |
| 1.87E-10   | 0.545954718 | 0.818 | 0.47  | 5.99E-06    | 20 GALNT11    |
| 9.72E-20   | 0.54594974  | 0.455 | 0.123 | 3.12E-15    | 20 AQP2       |
| 1.82E-30   | 0.545626017 | 0.909 | 0.274 | 5.84E-26    | 20 SLC6A13    |
| 9.95E-12   | 0.545268273 | 0.852 | 0.475 | 3.20E-07    | 20 SPIRE1     |
| 9.62E-09   | 0.545227464 | 0.92  | 0.673 | 0.000308953 | 20 AAK1       |
| 1.87E-19   | 0.543349812 | 0.477 | 0.137 | 6.00E-15    | 20 PSMA1      |
| 8.82E-12   | 0.543023718 | 0.625 | 0.287 | 2.83E-07    | 20 SCN3A      |
| 3.53E-10   | 0.541872928 | 0.545 | 0.254 | 1.13E-05    | 20 KIF26B     |
| 2.08E-10   | 0.538371944 | 0.966 | 0.703 | 6.68E-06    | 20 WSB1       |
| 5.90E-09   | 0.537178232 | 0.989 | 0.782 | 0.000189627 | 20 SETBP1     |
| 3.68E-22   | 0.536810991 | 0.818 | 0.287 | 1.18E-17    | 20 LINC00871  |
| 1.82E-05   | 0.536167064 | 0.511 | 0.305 | 0.584300338 | 20 LINC02694  |
| 3.55E-10   | 0.536044736 | 0.852 | 0.518 | 1.14E-05    | 20 C4orf19    |
| 2.42E-11   | 0.527867247 | 1     | 0.832 | 7.78E-07    | 20 PTH2R      |
| 3.56E-12   | 0.527228334 | 0.398 | 0.139 | 1.14E-07    | 20 AL512506.3 |
| 3.96E-10   | 0.524890562 | 0.477 | 0.206 | 1.27E-05    | 20 FSTL4      |
| 1.33E-12   | 0.524104291 | 0.58  | 0.249 | 4.26E-08    | 20 AIF1L      |
| 2.55E-10   | 0.522984396 | 0.591 | 0.275 | 8.19E-06    | 20 ZNF208     |
| 1.99E-18   | 0.522756995 | 0.295 | 0.064 | 6.38E-14    | 20 AC019080.3 |
| 2.52E-09   | 0.520361137 | 0.966 | 0.664 | 8.10E-05    | 20 LIMCH1     |
| 2.74E-06   | 0.519609033 | 0.739 | 0.523 | 0.087949256 | 20 RNF19A     |
| 5.54E-18   | 0.515596351 | 0.511 | 0.166 | 1.78E-13    | 20 RASGRP1    |
| 1.17E-10   | 0.51446913  | 0.5   | 0.225 | 3.75E-06    | 20 MAL2       |
| 1.32E-06   | 0.513053538 | 0.318 | 0.142 | 0.042469544 | 20 HMGA2      |
| 5.33E-12   | 0.511844083 | 0.818 | 0.416 | 1.71E-07    | 20 SPATS2L    |

|          |             |       |       |             |                |
|----------|-------------|-------|-------|-------------|----------------|
| 8.54E-16 | 0.50777726  | 0.523 | 0.174 | 2.74E-11    | 20 SLC27A2     |
| 1.52E-08 | 0.500687376 | 0.659 | 0.376 | 0.000488377 | 20 DHX9        |
| 9.93E-12 | 0.495651173 | 0.761 | 0.395 | 3.19E-07    | 20 AC074386.1  |
| 3.48E-21 | 0.49543725  | 0.545 | 0.154 | 1.12E-16    | 20 SLC7A7      |
| 3.22E-09 | 0.490533791 | 0.977 | 0.686 | 0.000103278 | 20 KAZN        |
| 9.59E-25 | 0.48745893  | 1     | 0.365 | 3.08E-20    | 20 ACSM2B      |
| 7.79E-10 | 0.485587263 | 0.489 | 0.214 | 2.50E-05    | 20 MYRFL       |
| 3.60E-10 | 0.483268386 | 1     | 0.831 | 1.16E-05    | 20 BICC1       |
| 6.53E-14 | 0.482297465 | 0.25  | 0.058 | 2.10E-09    | 20 LINC01924   |
| 7.56E-10 | 0.481319857 | 0.534 | 0.255 | 2.43E-05    | 20 PGM5        |
| 1.46E-06 | 0.479420728 | 0.614 | 0.369 | 0.046762074 | 20 LATS2       |
| 2.25E-07 | 0.478937041 | 0.989 | 0.814 | 0.007229075 | 20 MAPK10      |
| 1.02E-08 | 0.478163511 | 0.841 | 0.528 | 0.00032694  | 20 MAP4K3-DT   |
| 1.52E-07 | 0.478029862 | 0.807 | 0.572 | 0.004890932 | 20 WWTR1       |
| 7.37E-10 | 0.475446434 | 0.341 | 0.124 | 2.37E-05    | 20 TMEM45B     |
| 2.60E-13 | 0.472781986 | 0.636 | 0.27  | 8.36E-09    | 20 AC008554.1  |
| 2.08E-10 | 0.471136663 | 0.568 | 0.261 | 6.68E-06    | 20 GS1-24F4.2  |
| 4.84E-16 | 0.470482512 | 0.364 | 0.098 | 1.56E-11    | 20 HES1        |
| 1.92E-30 | 0.469992343 | 0.932 | 0.302 | 6.17E-26    | 20 FTCD        |
| 8.41E-15 | 0.46880256  | 0.5   | 0.175 | 2.70E-10    | 20 PLPP4       |
| 1.20E-10 | 0.4683022   | 0.648 | 0.318 | 3.86E-06    | 20 IQCK        |
| 8.44E-06 | 0.468235938 | 0.58  | 0.351 | 0.270960384 | 20 ST6GAL1     |
| 3.66E-20 | 0.467240112 | 0.261 | 0.049 | 1.17E-15    | 20 OVCH2       |
| 6.15E-11 | 0.463725849 | 0.375 | 0.135 | 1.98E-06    | 20 HOXA9       |
| 1.60E-10 | 0.463377083 | 0.625 | 0.279 | 5.13E-06    | 20 KCTD8       |
| 2.57E-08 | 0.462174327 | 0.989 | 0.717 | 0.000826012 | 20 ADAMTS9-AS2 |
| 9.53E-10 | 0.4618019   | 0.807 | 0.48  | 3.06E-05    | 20 COL18A1     |
| 2.54E-06 | 0.460803387 | 0.989 | 0.732 | 0.081512899 | 20 AC008014.1  |
| 1.39E-11 | 0.4605022   | 0.852 | 0.538 | 4.45E-07    | 20 GUSBP11     |
| 9.40E-08 | 0.459320456 | 0.909 | 0.544 | 0.003019642 | 20 SPAG16      |
| 3.26E-10 | 0.458027232 | 0.75  | 0.395 | 1.05E-05    | 20 ADAMTS16    |
| 2.32E-08 | 0.455759199 | 0.75  | 0.429 | 0.000746204 | 20 MGMT        |
| 2.92E-11 | 0.45472095  | 0.841 | 0.477 | 9.37E-07    | 20 MOB1B       |
| 1.39E-08 | 0.453174897 | 0.761 | 0.439 | 0.000446709 | 20 ALOX12P2    |
| 2.56E-14 | 0.451701185 | 0.318 | 0.086 | 8.23E-10    | 20 PRR5L       |
| 1.03E-22 | 0.451632636 | 0.784 | 0.271 | 3.32E-18    | 20 ENPP7P8     |
| 5.16E-09 | 0.451203841 | 0.795 | 0.482 | 0.000165804 | 20 LRRC37A2    |
| 2.01E-08 | 0.451038492 | 0.784 | 0.497 | 0.00064563  | 20 DOCK7       |
| 9.25E-09 | 0.448045687 | 0.773 | 0.448 | 0.000297011 | 20 HDAC4       |
| 3.35E-19 | 0.447641172 | 0.523 | 0.158 | 1.07E-14    | 20 TBX2        |
| 3.35E-07 | 0.447403327 | 0.727 | 0.437 | 0.010764424 | 20 SRGAP3      |
| 1.59E-11 | 0.445179046 | 0.716 | 0.363 | 5.11E-07    | 20 HIP1R       |
| 1.81E-23 | 0.445058809 | 0.807 | 0.263 | 5.82E-19    | 20 TINAG       |
| 3.73E-05 | 0.443057334 | 0.364 | 0.199 | 1           | 20 ZNF43       |
| 3.08E-14 | 0.442949835 | 0.557 | 0.213 | 9.89E-10    | 20 SLC38A11    |
| 1.16E-10 | 0.442375147 | 0.659 | 0.328 | 3.71E-06    | 20 SNX2        |
| 3.05E-23 | 0.441518708 | 0.727 | 0.246 | 9.80E-19    | 20 RNF212B     |
| 4.02E-21 | 0.441171734 | 0.716 | 0.232 | 1.29E-16    | 20 ASS1        |
| 2.52E-18 | 0.439804815 | 0.727 | 0.263 | 8.10E-14    | 20 AC027288.3  |
| 9.36E-09 | 0.439182779 | 1     | 0.878 | 0.000300466 | 20 PKHD1       |
| 4.33E-09 | 0.436764437 | 0.511 | 0.259 | 0.000139027 | 20 DMAC2L      |

|            |             |       |       |             |               |
|------------|-------------|-------|-------|-------------|---------------|
| 6.16E-14   | 0.436147353 | 0.659 | 0.266 | 1.98E-09    | 20 EHHADH     |
| 6.85E-06   | 0.435296342 | 0.636 | 0.405 | 0.220065148 | 20 PHACTR2    |
| 1.84E-12   | 0.433344496 | 0.761 | 0.38  | 5.92E-08    | 20 CDH16      |
| 5.67E-07   | 0.432993129 | 0.864 | 0.616 | 0.018218384 | 20 LRRFIP1    |
| 9.44E-17   | 0.432434445 | 0.693 | 0.271 | 3.03E-12    | 20 SLC7A8     |
| 3.12E-14   | 0.431254396 | 0.557 | 0.205 | 1.00E-09    | 20 RERGL      |
| 1.40E-12   | 0.431078902 | 0.875 | 0.488 | 4.49E-08    | 20 NDRG1      |
| 7.43E-06   | 0.430844062 | 0.625 | 0.379 | 0.238562898 | 20 CLCN3      |
| 8.08E-22   | 0.430638198 | 0.636 | 0.183 | 2.59E-17    | 20 PLG        |
| 8.37E-09   | 0.430609561 | 0.909 | 0.574 | 0.000268784 | 20 SSH2       |
| 1.16E-05   | 0.429607729 | 0.273 | 0.123 | 0.371804615 | 20 LYPD6B     |
| 4.06E-07   | 0.429237517 | 0.398 | 0.184 | 0.01303685  | 20 AL365295.1 |
| 2.13E-13   | 0.427776286 | 0.295 | 0.081 | 6.86E-09    | 20 MOCOS      |
| 2.06E-09   | 0.426469252 | 0.341 | 0.127 | 6.62E-05    | 20 SCCPDH     |
| 4.96E-23   | 0.423746866 | 0.523 | 0.134 | 1.59E-18    | 20 SLC17A4    |
| 1.29E-20   | 0.423703442 | 0.284 | 0.054 | 4.13E-16    | 20 SHCBP1     |
| 4.24E-07   | 0.421952996 | 0.705 | 0.428 | 0.013610472 | 20 SKAP2      |
| 1.58E-10   | 0.420621474 | 0.42  | 0.16  | 5.09E-06    | 20 FAT4       |
| 1.09E-07   | 0.420081609 | 0.727 | 0.45  | 0.003513302 | 20 MTMR10     |
| 3.80E-07   | 0.418380675 | 0.739 | 0.494 | 0.012202612 | 20 SMARCA2    |
| 7.65E-12   | 0.417341581 | 0.443 | 0.163 | 2.46E-07    | 20 TRERF1     |
| 2.96E-10   | 0.416425095 | 0.352 | 0.125 | 9.50E-06    | 20 AFAP1L2    |
| 0.00076705 | 0.415463141 | 0.682 | 0.468 | 1           | 20 RBBP8      |
| 1.31E-09   | 0.414750558 | 0.489 | 0.215 | 4.21E-05    | 20 HOXA3      |
| 5.17E-18   | 0.414292165 | 0.636 | 0.217 | 1.66E-13    | 20 XYLB       |
| 6.01E-09   | 0.414271816 | 0.364 | 0.145 | 0.000192973 | 20 LIPH       |
| 1.89E-09   | 0.412151477 | 0.92  | 0.615 | 6.07E-05    | 20 SRRM2      |
| 4.08E-08   | 0.410888377 | 0.545 | 0.27  | 0.001311792 | 20 RPH3AL     |
| 8.38E-15   | 0.410887769 | 0.409 | 0.126 | 2.69E-10    | 20 SCPEP1     |
| 7.46E-22   | 0.410734826 | 0.989 | 0.395 | 2.40E-17    | 20 ACSM2A     |
| 5.10E-08   | 0.410048792 | 0.909 | 0.607 | 0.00163705  | 20 CCDC198    |
| 7.65E-10   | 0.409604111 | 0.909 | 0.524 | 2.46E-05    | 20 OPHN1      |
| 1.06E-21   | 0.409277157 | 0.989 | 0.459 | 3.39E-17    | 20 CUBN       |
| 5.46E-11   | 0.408613145 | 0.341 | 0.115 | 1.75E-06    | 20 GABRA2     |
| 4.21E-08   | 0.408326515 | 0.75  | 0.444 | 0.001351197 | 20 MYH10      |
| 4.29E-17   | 0.408111919 | 0.352 | 0.09  | 1.38E-12    | 20 AC013470.2 |
| 1.17E-08   | 0.408048837 | 0.875 | 0.555 | 0.000375259 | 20 TRAK1      |
| 1.16E-12   | 0.40750748  | 0.784 | 0.381 | 3.72E-08    | 20 FRY        |
| 1.54E-12   | 0.407095042 | 0.511 | 0.2   | 4.96E-08    | 20 PFKFB3     |
| 4.92E-09   | 0.40577059  | 0.886 | 0.543 | 0.000157951 | 20 PAX2       |
| 3.13E-24   | 0.404717726 | 0.83  | 0.254 | 1.01E-19    | 20 GLYAT      |
| 2.51E-06   | 0.404060795 | 0.511 | 0.268 | 0.080679188 | 20 KITLG      |
| 3.70E-06   | 0.403010758 | 0.432 | 0.223 | 0.118784029 | 20 SPAG17     |
| 2.89E-10   | 0.402869907 | 0.5   | 0.2   | 9.27E-06    | 20 LINC01788  |
| 3.60E-07   | 0.40243507  | 0.636 | 0.365 | 0.011555598 | 20 SPATS2     |
| 7.25E-05   | 0.401224471 | 0.5   | 0.29  | 1           | 20 SEMA6A     |
| 5.17E-09   | 0.400846163 | 0.489 | 0.221 | 0.000165981 | 20 B4GALNT3   |
| 1.68E-09   | 0.400791304 | 0.795 | 0.456 | 5.39E-05    | 20 PACSIN2    |
| 3.70E-07   | 0.400350834 | 0.545 | 0.299 | 0.01187371  | 20 SLC11A2    |
| 1.01E-10   | 0.399196972 | 0.625 | 0.288 | 3.25E-06    | 20 L2HGDH     |
| 2.39E-15   | 0.398904893 | 0.466 | 0.155 | 7.68E-11    | 20 NAA20      |

|            |             |       |       |             |                 |
|------------|-------------|-------|-------|-------------|-----------------|
| 2.34E-05   | 0.397382127 | 0.534 | 0.321 | 0.750690318 | 20 RAB11FIP2    |
| 1.34E-08   | 0.396649931 | 0.455 | 0.207 | 0.00043114  | 20 SLC25A29     |
| 1.29E-06   | 0.396285993 | 0.33  | 0.148 | 0.041329877 | 20 HBG2         |
| 2.33E-13   | 0.39569852  | 0.614 | 0.245 | 7.48E-09    | 20 ARSB         |
| 8.77E-09   | 0.395457499 | 0.92  | 0.61  | 0.000281727 | 20 ULK4         |
| 3.23E-09   | 0.395101789 | 0.659 | 0.314 | 0.00010374  | 20 GPRIN3       |
| 9.65E-08   | 0.39493751  | 0.659 | 0.359 | 0.003098381 | 20 EMX2OS       |
| 7.86E-07   | 0.393313036 | 0.852 | 0.571 | 0.025252002 | 20 ZNF704       |
| 2.52E-07   | 0.393025505 | 0.841 | 0.561 | 0.008083095 | 20 ADGRL2       |
| 2.59E-10   | 0.392068804 | 0.716 | 0.349 | 8.33E-06    | 20 SLC16A10     |
| 5.58E-26   | 0.390601244 | 0.898 | 0.278 | 1.79E-21    | 20 SLC13A3      |
| 6.41E-06   | 0.3898761   | 0.682 | 0.415 | 0.205765582 | 20 NEK11        |
| 3.92E-11   | 0.388439347 | 0.398 | 0.146 | 1.26E-06    | 20 HOXD10       |
| 4.10E-12   | 0.385415963 | 0.273 | 0.074 | 1.32E-07    | 20 LINC02649    |
| 5.38E-22   | 0.384201755 | 0.875 | 0.298 | 1.73E-17    | 20 SLC17A1      |
| 1.87E-26   | 0.383475308 | 0.864 | 0.255 | 6.01E-22    | 20 PAH          |
| 4.99E-11   | 0.382025081 | 0.784 | 0.391 | 1.60E-06    | 20 SHROOM4      |
| 1.66E-11   | 0.380986105 | 0.477 | 0.189 | 5.34E-07    | 20 TWSG1        |
| 3.09E-06   | 0.379014829 | 0.909 | 0.675 | 0.099194116 | 20 MAP4K3       |
| 2.69E-07   | 0.378303252 | 0.864 | 0.537 | 0.00862487  | 20 MRPL33       |
| 7.51E-08   | 0.377968924 | 0.42  | 0.189 | 0.002413549 | 20 HSPA1B       |
| 1.01E-06   | 0.376581432 | 0.375 | 0.18  | 0.032505451 | 20 TMEM50B      |
| 6.88E-09   | 0.376339925 | 0.886 | 0.523 | 0.000220855 | 20 DPY19L2      |
| 1.74E-15   | 0.374832894 | 0.977 | 0.606 | 5.60E-11    | 20 RAB11FIP3    |
| 1.03E-10   | 0.374319018 | 0.557 | 0.247 | 3.32E-06    | 20 AC127526.3   |
| 1.00E-20   | 0.374097225 | 0.693 | 0.215 | 3.21E-16    | 20 ALDOB        |
| 7.52E-08   | 0.373377201 | 0.557 | 0.271 | 0.002416743 | 20 RAPH1        |
| 5.41E-05   | 0.372607732 | 0.58  | 0.363 | 1           | 20 HSP90AA1     |
| 3.59E-05   | 0.371308842 | 0.648 | 0.418 | 1           | 20 RNF180       |
| 1.68E-06   | 0.369771111 | 0.841 | 0.587 | 0.05382029  | 20 WWC1         |
| 1.21E-20   | 0.369493404 | 0.659 | 0.195 | 3.88E-16    | 20 DPYS         |
| 4.04E-10   | 0.36914415  | 0.443 | 0.178 | 1.30E-05    | 20 PRTG         |
| 8.41E-05   | 0.368361483 | 0.614 | 0.362 | 1           | 20 WDSUB1       |
| 2.65E-06   | 0.36801715  | 0.716 | 0.442 | 0.08517618  | 20 TSGA10       |
| 1.31E-05   | 0.367748941 | 0.375 | 0.184 | 0.419429625 | 20 ADAMTSL3     |
| 3.94E-07   | 0.366146797 | 0.932 | 0.628 | 0.012639361 | 20 LINC02532    |
| 5.84E-13   | 0.365217971 | 0.33  | 0.096 | 1.87E-08    | 20 SMIM5        |
| 2.08E-23   | 0.364934794 | 0.534 | 0.136 | 6.68E-19    | 20 AC010451.1   |
| 5.18E-09   | 0.364644949 | 0.83  | 0.484 | 0.000166299 | 20 ARHGEF35-AS1 |
| 2.64E-11   | 0.364020715 | 0.352 | 0.117 | 8.47E-07    | 20 TLE3         |
| 3.23E-10   | 0.363569799 | 0.705 | 0.339 | 1.04E-05    | 20 FREM2        |
| 0.00034052 | 0.360669066 | 0.295 | 0.158 | 1           | 20 AC004540.1   |
| 3.87E-07   | 0.359699949 | 0.557 | 0.303 | 0.012424054 | 20 ZNF75D       |
| 2.32E-07   | 0.356768991 | 0.636 | 0.343 | 0.007445183 | 20 BLNK         |
| 3.76E-24   | 0.354310876 | 0.261 | 0.041 | 1.21E-19    | 20 ELF5         |
| 0.00040372 | 0.35417244  | 0.261 | 0.127 | 1           | 20 H2AC6        |
| 1.37E-07   | 0.354036565 | 0.818 | 0.497 | 0.004411831 | 20 TBC1D19      |
| 2.64E-07   | 0.35396859  | 0.25  | 0.092 | 0.008476354 | 20 IDI1         |
| 7.14E-22   | 0.353627032 | 0.523 | 0.137 | 2.29E-17    | 20 FUT6         |
| 2.24E-09   | 0.352621226 | 0.284 | 0.096 | 7.20E-05    | 20 PNP          |
| 1.04E-07   | 0.351097144 | 0.716 | 0.394 | 0.003329297 | 20 TOX          |

|            |             |       |       |             |                |
|------------|-------------|-------|-------|-------------|----------------|
| 8.60E-07   | 0.350856439 | 0.83  | 0.51  | 0.02760582  | 20 EPB41L3     |
| 5.38E-07   | 0.350302667 | 0.773 | 0.507 | 0.017271623 | 20 MIR3936HG   |
| 1.98E-10   | 0.349209934 | 0.443 | 0.172 | 6.34E-06    | 20 COL4A6      |
| 1.97E-16   | 0.348301023 | 0.33  | 0.082 | 6.32E-12    | 20 TBX2-AS1    |
| 7.46E-11   | 0.348155803 | 0.364 | 0.125 | 2.40E-06    | 20 TFAP2A      |
| 1.33E-08   | 0.348028813 | 0.307 | 0.114 | 0.000425651 | 20 DCPS        |
| 0.00012258 | 0.347509472 | 0.284 | 0.144 | 1           | 20 ZNF350-AS1  |
| 0.00121177 | 0.346888998 | 0.443 | 0.281 | 1           | 20 TERF2IP     |
| 1.52E-09   | 0.345728449 | 0.75  | 0.41  | 4.87E-05    | 20 DMXL2       |
| 1.02E-08   | 0.345325988 | 0.511 | 0.233 | 0.000328361 | 20 ARSJ        |
| 3.73E-12   | 0.345142203 | 0.307 | 0.088 | 1.20E-07    | 20 LINC01349   |
| 4.89E-08   | 0.344823553 | 0.659 | 0.369 | 0.001569237 | 20 LAMTOR5-AS1 |
| 4.52E-09   | 0.344507399 | 0.83  | 0.473 | 0.000145161 | 20 EPB41L1     |
| 0.00029019 | 0.344292478 | 0.92  | 0.757 | 1           | 20 BABAM2      |
| 2.32E-09   | 0.343586095 | 0.591 | 0.283 | 7.44E-05    | 20 AFMID       |
| 1.04E-07   | 0.343124517 | 0.557 | 0.285 | 0.00334078  | 20 TEKT4P2     |
| 1.69E-06   | 0.343010735 | 0.807 | 0.537 | 0.054414454 | 20 C11orf49    |
| 1.99E-06   | 0.342778239 | 1     | 0.886 | 0.063935508 | 20 IMM2P2L     |
| 7.08E-07   | 0.342182276 | 0.898 | 0.573 | 0.022734658 | 20 MRTFB       |
| 1.67E-08   | 0.341826489 | 0.795 | 0.442 | 0.000534972 | 20 PRDM16      |
| 1.01E-05   | 0.341462086 | 1     | 0.85  | 0.32584634  | 20 LRMDA       |
| 5.24E-07   | 0.341444464 | 0.989 | 0.771 | 0.016842071 | 20 NPIP5       |
| 5.21E-14   | 0.341048468 | 0.261 | 0.062 | 1.67E-09    | 20 GDNF-AS1    |
| 1.70E-06   | 0.34101402  | 0.364 | 0.17  | 0.054680654 | 20 C3orf52     |
| 1.51E-08   | 0.339617266 | 0.852 | 0.525 | 0.000485476 | 20 PAX8        |
| 1.71E-06   | 0.339006831 | 1     | 0.866 | 0.055047345 | 20 ANK3        |
| 1.39E-11   | 0.338721027 | 0.58  | 0.244 | 4.46E-07    | 20 PIGQ        |
| 9.48E-13   | 0.338627362 | 0.261 | 0.068 | 3.05E-08    | 20 AC005746.2  |
| 7.73E-10   | 0.338470909 | 0.761 | 0.405 | 2.48E-05    | 20 CMYA5       |
| 6.61E-05   | 0.337630797 | 0.42  | 0.241 | 1           | 20 RGD2        |
| 1.90E-06   | 0.336371449 | 0.591 | 0.324 | 0.061074355 | 20 CCDC178     |
| 1.07E-05   | 0.335928188 | 0.727 | 0.479 | 0.344770677 | 20 DOP1A       |
| 3.07E-05   | 0.335469862 | 0.477 | 0.276 | 0.984849774 | 20 ZNF236      |
| 6.52E-07   | 0.335262378 | 0.42  | 0.199 | 0.020955609 | 20 LINC01006   |
| 2.15E-06   | 0.331986057 | 0.284 | 0.118 | 0.069016587 | 20 AL355499.1  |
| 0.00096448 | 0.331819759 | 0.398 | 0.246 | 1           | 20 TGFBR1      |
| 1.59E-07   | 0.331356137 | 0.977 | 0.711 | 0.005106267 | 20 PRKCA       |
| 0.00034486 | 0.331348023 | 0.648 | 0.445 | 1           | 20 TAB2        |
| 0.00011673 | 0.331128983 | 0.364 | 0.202 | 1           | 20 PSMG2       |
| 1.17E-06   | 0.330994681 | 1     | 0.803 | 0.037623247 | 20 SNHG14      |
| 6.31E-12   | 0.329439984 | 0.273 | 0.077 | 2.03E-07    | 20 AL161457.2  |
| 1.48E-08   | 0.329352832 | 0.591 | 0.298 | 0.000473886 | 20 STX3        |
| 9.01E-09   | 0.328199409 | 0.705 | 0.377 | 0.000289252 | 20 AC004593.2  |
| 9.98E-24   | 0.327731971 | 0.773 | 0.231 | 3.21E-19    | 20 SLC22A6     |
| 3.31E-19   | 0.327451432 | 0.432 | 0.111 | 1.06E-14    | 20 SLC6A19     |
| 5.53E-08   | 0.327167002 | 0.795 | 0.42  | 0.001774975 | 20 COL4A5      |
| 9.35E-12   | 0.326774659 | 0.511 | 0.2   | 3.00E-07    | 20 ADGRF1      |
| 5.04E-10   | 0.324894513 | 0.602 | 0.277 | 1.62E-05    | 20 NQO2        |
| 8.06E-06   | 0.324891647 | 0.523 | 0.294 | 0.258727316 | 20 CDH1        |
| 2.72E-15   | 0.323145842 | 0.523 | 0.175 | 8.72E-11    | 20 SPATA22     |
| 2.40E-07   | 0.322633091 | 0.295 | 0.115 | 0.007698243 | 20 CACNA1E     |

|            |             |       |       |             |    |            |
|------------|-------------|-------|-------|-------------|----|------------|
| 3.52E-09   | 0.322612363 | 0.773 | 0.423 | 0.000113137 | 20 | EPS8L2     |
| 2.15E-07   | 0.321766354 | 0.807 | 0.506 | 0.006910365 | 20 | DMGDH      |
| 9.59E-07   | 0.321623392 | 0.648 | 0.366 | 0.03081206  | 20 | PPARG      |
| 9.05E-07   | 0.320541065 | 0.83  | 0.492 | 0.029072395 | 20 | HOXB3      |
| 1.42E-05   | 0.320364798 | 1     | 0.786 | 0.454460883 | 20 | NAALADL2   |
| 1.27E-12   | 0.319689359 | 0.659 | 0.271 | 4.07E-08    | 20 | RASSF4     |
| 2.71E-06   | 0.319598303 | 0.886 | 0.577 | 0.086974845 | 20 | HDAC8      |
| 6.07E-07   | 0.319501772 | 0.898 | 0.59  | 0.019491323 | 20 | HIBCH      |
| 2.85E-07   | 0.319119157 | 0.739 | 0.456 | 0.009161908 | 20 | ARHGEF10L  |
| 2.48E-11   | 0.317951695 | 0.443 | 0.167 | 7.96E-07    | 20 | PGPEP1     |
| 7.35E-06   | 0.315989804 | 0.943 | 0.655 | 0.235970671 | 20 | SH3RF1     |
| 1.59E-08   | 0.315641278 | 0.568 | 0.275 | 0.00051099  | 20 | NHSL1      |
| 2.07E-11   | 0.31560245  | 0.625 | 0.266 | 6.65E-07    | 20 | LSP1P4     |
| 1.94E-10   | 0.315196787 | 0.682 | 0.342 | 6.24E-06    | 20 | PDPR       |
| 2.47E-10   | 0.315050544 | 0.284 | 0.087 | 7.94E-06    | 20 | STXBP6     |
| 6.21E-16   | 0.313842088 | 0.477 | 0.146 | 2.00E-11    | 20 | CLEC18B    |
| 1.51E-05   | 0.312531279 | 0.67  | 0.417 | 0.484939193 | 20 | LINC01362  |
| 2.06E-06   | 0.312244142 | 0.989 | 0.838 | 0.066209757 | 20 | SNX29      |
| 6.78E-07   | 0.311863105 | 0.716 | 0.425 | 0.021759324 | 20 | BICD1      |
| 0.00016734 | 0.311202203 | 0.693 | 0.48  | 1           | 20 | MARCHF7    |
| 1.21E-06   | 0.311099786 | 0.943 | 0.651 | 0.038811515 | 20 | NFIB       |
| 6.69E-06   | 0.310143935 | 0.511 | 0.279 | 0.214898468 | 20 | GPR39      |
| 2.08E-06   | 0.309997955 | 0.886 | 0.583 | 0.066849012 | 20 | TFDP2      |
| 3.28E-05   | 0.309845375 | 0.398 | 0.211 | 1           | 20 | MAP3K15    |
| 1.69E-06   | 0.309438674 | 0.693 | 0.401 | 0.05432639  | 20 | LRRC28     |
| 4.13E-05   | 0.309304582 | 0.591 | 0.376 | 1           | 20 | RAD9A      |
| 2.41E-06   | 0.309147968 | 0.727 | 0.456 | 0.077301645 | 20 | ZNF586     |
| 5.57E-10   | 0.309046421 | 0.443 | 0.17  | 1.79E-05    | 20 | FIGNL1     |
| 6.61E-05   | 0.309016561 | 0.932 | 0.725 | 1           | 20 | KANSL1L    |
| 4.98E-07   | 0.308779855 | 0.568 | 0.308 | 0.01598955  | 20 | AC005670.2 |
| 1.86E-05   | 0.308507679 | 0.795 | 0.54  | 0.597938582 | 20 | CYRIB      |
| 3.22E-06   | 0.307299733 | 0.636 | 0.378 | 0.103299941 | 20 | HMGN3      |
| 1.42E-06   | 0.307145408 | 0.557 | 0.294 | 0.045620048 | 20 | CYP7B1     |
| 6.10E-07   | 0.306455747 | 0.466 | 0.235 | 0.01957992  | 20 | TBC1D16    |
| 8.16E-12   | 0.306117438 | 0.466 | 0.174 | 2.62E-07    | 20 | ABO        |
| 1.20E-09   | 0.304680599 | 0.273 | 0.087 | 3.84E-05    | 20 | AQP7       |
| 3.90E-08   | 0.304571873 | 0.33  | 0.128 | 0.001252972 | 20 | KCP        |
| 3.80E-06   | 0.30416509  | 0.318 | 0.141 | 0.121895598 | 20 | GPR132     |
| 4.04E-12   | 0.304069977 | 0.636 | 0.264 | 1.30E-07    | 20 | Z93403.1   |
| 3.46E-06   | 0.303980185 | 0.739 | 0.462 | 0.111184462 | 20 | FAM107B    |
| 0.00023099 | 0.303776446 | 0.568 | 0.36  | 1           | 20 | SGPP2      |
| 3.60E-06   | 0.303648349 | 0.557 | 0.297 | 0.11565036  | 20 | MAL        |
| 0.00219179 | 0.301949624 | 0.545 | 0.375 | 1           | 20 | SMIM8      |
| 1.26E-09   | 0.301305781 | 0.375 | 0.139 | 4.06E-05    | 20 | DLGAP2     |
| 3.95E-07   | 0.300178259 | 0.443 | 0.213 | 0.012679503 | 20 | SNTB2      |
| 1.59E-05   | 0.299783842 | 0.432 | 0.232 | 0.509784327 | 20 | GNPAT      |
| 6.10E-07   | 0.298220366 | 0.318 | 0.138 | 0.019597739 | 20 | PRMT1      |
| 2.12E-12   | 0.297934138 | 0.432 | 0.149 | 6.81E-08    | 20 | AC127526.2 |
| 2.32E-10   | 0.297245706 | 0.409 | 0.154 | 7.44E-06    | 20 | PIEZO1     |
| 2.27E-06   | 0.296475302 | 0.636 | 0.354 | 0.072766849 | 20 | CSGALNACT1 |
| 5.06E-05   | 0.296359144 | 0.705 | 0.478 | 1           | 20 | CCDC7      |

|            |             |       |       |             |               |
|------------|-------------|-------|-------|-------------|---------------|
| 7.23E-21   | 0.295981792 | 0.83  | 0.284 | 2.32E-16    | 20 ACSF2      |
| 9.44E-05   | 0.295724896 | 0.455 | 0.265 | 1           | 20 SRSF6      |
| 7.82E-18   | 0.295665984 | 0.739 | 0.267 | 2.51E-13    | 20 EBNA1BP2   |
| 5.93E-07   | 0.295441486 | 0.443 | 0.215 | 0.019032659 | 20 MTMR8      |
| 4.26E-06   | 0.295413713 | 0.398 | 0.192 | 0.136742171 | 20 BTG2       |
| 6.32E-06   | 0.295290881 | 0.784 | 0.525 | 0.202997    | 20 NEMF       |
| 7.15E-06   | 0.295241954 | 0.591 | 0.331 | 0.229667652 | 20 ZNF98      |
| 4.16E-13   | 0.29496935  | 0.591 | 0.217 | 1.34E-08    | 20 AL589669.1 |
| 6.09E-09   | 0.294789009 | 0.398 | 0.156 | 0.000195744 | 20 SYNDIG1    |
| 0.00015686 | 0.294334307 | 0.489 | 0.3   | 1           | 20 RTN3       |
| 0.00285944 | 0.293512368 | 0.25  | 0.14  | 1           | 20 ST3GAL4    |
| 9.38E-08   | 0.292828835 | 0.341 | 0.141 | 0.003011753 | 20 LINC01106  |
| 9.10E-06   | 0.29250626  | 0.739 | 0.475 | 0.292194962 | 20 HOXD3      |
| 5.45E-06   | 0.292486293 | 0.318 | 0.151 | 0.175128902 | 20 TMCO1      |
| 7.90E-09   | 0.292432737 | 0.341 | 0.129 | 0.00025388  | 20 KYAT1      |
| 1.15E-05   | 0.291544825 | 0.432 | 0.232 | 0.369786649 | 20 RRAGB      |
| 2.57E-09   | 0.2912887   | 0.295 | 0.101 | 8.25E-05    | 20 FAM241A    |
| 2.09E-09   | 0.291253912 | 0.659 | 0.312 | 6.70E-05    | 20 CACHD1     |
| 1.10E-05   | 0.291084204 | 0.352 | 0.175 | 0.352875086 | 20 FZD4       |
| 1.36E-07   | 0.290803823 | 0.284 | 0.107 | 0.004375077 | 20 FAM3B      |
| 3.45E-06   | 0.290435121 | 0.773 | 0.487 | 0.110930377 | 20 AL591684.2 |
| 1.64E-07   | 0.290365968 | 0.295 | 0.116 | 0.005266357 | 20 SLC4A1AP   |
| 5.45E-10   | 0.289759408 | 0.375 | 0.136 | 1.75E-05    | 20 SPRY4-AS1  |
| 3.35E-07   | 0.288591669 | 0.352 | 0.154 | 0.010751422 | 20 MUC20P1    |
| 3.13E-24   | 0.288243773 | 0.784 | 0.227 | 1.00E-19    | 20 AGXT2      |
| 9.64E-11   | 0.288068139 | 0.602 | 0.265 | 3.10E-06    | 20 LSP1P5     |
| 5.10E-06   | 0.287885062 | 0.568 | 0.317 | 0.163684219 | 20 SH3BGRL    |
| 3.13E-06   | 0.287361498 | 0.648 | 0.381 | 0.100672988 | 20 CWC27      |
| 4.27E-06   | 0.28735065  | 0.375 | 0.18  | 0.137177529 | 20 KCNC3      |
| 0.00028602 | 0.287209865 | 0.307 | 0.165 | 1           | 20 AC011043.1 |
| 1.92E-07   | 0.28684469  | 0.875 | 0.53  | 0.006168239 | 20 LSM14A     |
| 0.00010041 | 0.286698464 | 0.466 | 0.269 | 1           | 20 SLC22A4    |
| 9.99E-06   | 0.28572224  | 0.773 | 0.523 | 0.320698215 | 20 ARL17B     |
| 5.47E-06   | 0.285246553 | 0.591 | 0.33  | 0.175521693 | 20 PTPN21     |
| 3.22E-06   | 0.285209733 | 0.602 | 0.34  | 0.103329476 | 20 CREM       |
| 2.52E-16   | 0.284660733 | 0.602 | 0.198 | 8.09E-12    | 20 SLC28A1    |
| 2.82E-06   | 0.284222474 | 0.557 | 0.307 | 0.090582879 | 20 CHPT1      |
| 0.00014853 | 0.283776058 | 0.261 | 0.127 | 1           | 20 WDR89      |
| 2.70E-08   | 0.283310018 | 0.273 | 0.095 | 0.000867714 | 20 RASAL1     |
| 0.00022247 | 0.282763135 | 0.648 | 0.437 | 1           | 20 LARP1      |
| 0.00040481 | 0.282442462 | 0.761 | 0.54  | 1           | 20 INVS       |
| 6.08E-06   | 0.281712353 | 0.659 | 0.39  | 0.195241325 | 20 EFCAB2     |
| 7.30E-06   | 0.281521148 | 0.682 | 0.416 | 0.234595183 | 20 NFX1       |
| 2.56E-06   | 0.281360309 | 0.25  | 0.1   | 0.082132351 | 20 RNF128     |
| 3.65E-10   | 0.280247175 | 0.364 | 0.129 | 1.17E-05    | 20 TTF1       |
| 0.00077044 | 0.279552033 | 0.386 | 0.23  | 1           | 20 SOBP       |
| 1.83E-07   | 0.279506455 | 0.432 | 0.202 | 0.005870108 | 20 CAPRN2     |
| 8.98E-06   | 0.27943463  | 0.682 | 0.429 | 0.288359321 | 20 GNPTAB     |
| 2.15E-06   | 0.279317825 | 0.807 | 0.51  | 0.068971558 | 20 KIFC3      |
| 5.32E-05   | 0.279261289 | 0.875 | 0.596 | 1           | 20 NBEA       |
| 2.54E-05   | 0.279051212 | 0.966 | 0.77  | 0.814520754 | 20 NPIP4      |



|            |             |       |       |             |                 |
|------------|-------------|-------|-------|-------------|-----------------|
| 4.52E-06   | 0.278588085 | 0.295 | 0.13  | 0.145294928 | 20 OR2A20P      |
| 1.35E-12   | 0.278272699 | 0.557 | 0.202 | 4.34E-08    | 20 HNF4A        |
| 0.0013515  | 0.278261706 | 0.489 | 0.328 | 1           | 20 IP6K1        |
| 2.91E-05   | 0.278108999 | 0.602 | 0.341 | 0.935735262 | 20 AC034195.1   |
| 5.03E-06   | 0.278035596 | 0.841 | 0.586 | 0.16155785  | 20 PARGP1       |
| 0.00011606 | 0.2780223   | 0.489 | 0.289 | 1           | 20 CEP162       |
| 2.60E-09   | 0.277987351 | 0.261 | 0.082 | 8.36E-05    | 20 AC024230.1   |
| 4.60E-09   | 0.277669894 | 0.352 | 0.134 | 0.000147742 | 20 EPOR         |
| 8.19E-06   | 0.277318908 | 0.932 | 0.625 | 0.263183993 | 20 PPP1R9A      |
| 1.03E-07   | 0.276932317 | 0.818 | 0.472 | 0.003316186 | 20 TNRC18       |
| 1.56E-08   | 0.276782168 | 0.966 | 0.684 | 0.000500594 | 20 WNK1         |
| 2.03E-06   | 0.276734327 | 0.261 | 0.105 | 0.065327165 | 20 GPR158       |
| 7.05E-08   | 0.276688817 | 0.42  | 0.19  | 0.002264932 | 20 NPHP1        |
| 2.41E-07   | 0.276585651 | 0.386 | 0.17  | 0.007752204 | 20 NIPAL1       |
| 3.33E-06   | 0.276557776 | 0.852 | 0.518 | 0.107060672 | 20 PCLO         |
| 3.88E-10   | 0.276544581 | 0.443 | 0.179 | 1.25E-05    | 20 SIGIRR       |
| 1.63E-06   | 0.275446715 | 0.466 | 0.242 | 0.052271994 | 20 TTC7A        |
| 0.00026951 | 0.27491025  | 0.284 | 0.147 | 1           | 20 IQCG         |
| 1.46E-05   | 0.274886417 | 0.739 | 0.447 | 0.470489834 | 20 FAT1         |
| 4.77E-06   | 0.274823433 | 0.307 | 0.136 | 0.153109121 | 20 AC246817.1   |
| 3.10E-15   | 0.274728059 | 0.727 | 0.303 | 9.95E-11    | 20 PCDH15       |
| 0.00013003 | 0.274720525 | 0.841 | 0.608 | 1           | 20 CD2AP        |
| 2.64E-08   | 0.274584483 | 0.909 | 0.59  | 0.00084837  | 20 AC068587.4   |
| 0.00026505 | 0.274100862 | 0.591 | 0.393 | 1           | 20 PARD6B       |
| 0.00010876 | 0.273882442 | 0.932 | 0.679 | 1           | 20 AC005208.1   |
| 3.78E-07   | 0.273463468 | 0.534 | 0.271 | 0.012132702 | 20 ARMCX5-GPRA  |
| 1.34E-09   | 0.273390344 | 0.648 | 0.308 | 4.32E-05    | 20 CYS1         |
| 4.00E-07   | 0.273355839 | 1     | 0.817 | 0.012856777 | 20 NEDD4L       |
| 0.00022734 | 0.273199756 | 0.909 | 0.69  | 1           | 20 JPX          |
| 3.29E-06   | 0.272620794 | 0.477 | 0.257 | 0.105681551 | 20 METTL9       |
| 4.41E-14   | 0.272483207 | 0.58  | 0.213 | 1.42E-09    | 20 MLXIPL       |
| 0.00088955 | 0.272388662 | 0.727 | 0.541 | 1           | 20 SHPRH        |
| 3.41E-05   | 0.272215275 | 0.932 | 0.631 | 1           | 20 CAMKMT       |
| 8.86E-11   | 0.272163937 | 0.375 | 0.13  | 2.84E-06    | 20 MGC27382     |
| 2.03E-05   | 0.272138029 | 0.716 | 0.453 | 0.651952324 | 20 NPHP3-ACAD11 |
| 2.62E-10   | 0.27190198  | 0.693 | 0.34  | 8.41E-06    | 20 CCDC200      |
| 6.09E-08   | 0.271773764 | 0.42  | 0.183 | 0.001954375 | 20 KLHL8        |
| 1.39E-06   | 0.271689947 | 0.409 | 0.192 | 0.044556516 | 20 MBOAT1       |
| 3.37E-05   | 0.271429845 | 0.409 | 0.222 | 1           | 20 RGPDI        |
| 1.69E-06   | 0.269906471 | 0.307 | 0.131 | 0.054426287 | 20 WASF3        |
| 2.67E-13   | 0.269855461 | 0.261 | 0.063 | 8.56E-09    | 20 LINC02128    |
| 1.09E-06   | 0.269768202 | 0.58  | 0.302 | 0.035119372 | 20 FOSL2        |
| 1.18E-05   | 0.269258722 | 0.477 | 0.262 | 0.377846649 | 20 CHSY1        |
| 1.04E-05   | 0.269047007 | 0.773 | 0.469 | 0.33360071  | 20 PRR5-ARHGAP8 |
| 0.00037388 | 0.268973316 | 0.307 | 0.163 | 1           | 20 KCNK1        |
| 3.28E-05   | 0.26787288  | 0.409 | 0.222 | 1           | 20 PPM1K        |
| 0.00108144 | 0.267846357 | 0.273 | 0.145 | 1           | 20 BRINP3       |
| 2.85E-16   | 0.267545955 | 0.455 | 0.133 | 9.14E-12    | 20 SLC22A11     |
| 8.12E-07   | 0.266855365 | 0.33  | 0.142 | 0.026066525 | 20 NPIP6        |
| 0.00012272 | 0.266472681 | 0.341 | 0.188 | 1           | 20 BRD8         |
| 9.18E-06   | 0.2661573   | 0.443 | 0.227 | 0.294807604 | 20 ZC4H2        |

|            |             |       |       |             |               |
|------------|-------------|-------|-------|-------------|---------------|
| 6.71E-06   | 0.266103819 | 0.727 | 0.448 | 0.215653515 | 20 STXBP5     |
| 0.00019079 | 0.266045232 | 0.261 | 0.129 | 1           | 20 AC025263.2 |
| 2.48E-08   | 0.265933629 | 0.92  | 0.573 | 0.000796078 | 20 NEBL       |
| 3.63E-05   | 0.265904704 | 0.432 | 0.234 | 1           | 20 RAB17      |
| 2.58E-09   | 0.265605123 | 0.375 | 0.142 | 8.27E-05    | 20 RHCG       |
| 3.02E-05   | 0.264816068 | 0.523 | 0.298 | 0.970995848 | 20 KDM5B      |
| 4.86E-10   | 0.264325332 | 0.568 | 0.241 | 1.56E-05    | 20 LINGO2     |
| 8.67E-12   | 0.263991959 | 0.398 | 0.136 | 2.78E-07    | 20 AC011287.1 |
| 7.30E-08   | 0.263539734 | 0.602 | 0.317 | 0.002345239 | 20 ERBB2      |
| 2.15E-07   | 0.263009477 | 0.716 | 0.395 | 0.006908857 | 20 DIAPH2     |
| 3.32E-06   | 0.262479578 | 1     | 0.803 | 0.106759147 | 20 PLEKHA5    |
| 3.30E-05   | 0.261864908 | 0.625 | 0.365 | 1           | 20 LMCD1-AS1  |
| 0.00041523 | 0.261451968 | 0.443 | 0.266 | 1           | 20 ZNF235     |
| 6.31E-15   | 0.26133345  | 0.614 | 0.214 | 2.03E-10    | 20 AK4        |
| 4.62E-05   | 0.261256091 | 0.375 | 0.204 | 1           | 20 RPE        |
| 1.12E-07   | 0.261191154 | 0.455 | 0.208 | 0.003596645 | 20 PECR       |
| 1.59E-05   | 0.259902902 | 0.818 | 0.538 | 0.511079005 | 20 LRRC37A3   |
| 4.86E-09   | 0.259874546 | 0.398 | 0.157 | 0.000156178 | 20 FAM149A    |
| 5.53E-05   | 0.259502881 | 0.727 | 0.457 | 1           | 20 MSH3       |
| 8.78E-11   | 0.259152334 | 0.273 | 0.08  | 2.82E-06    | 20 SMARCD3    |
| 2.55E-18   | 0.259103528 | 0.398 | 0.1   | 8.18E-14    | 20 SLC39A5    |
| 1.91E-16   | 0.258574105 | 0.375 | 0.097 | 6.15E-12    | 20 ENPP6      |
| 0.00037764 | 0.258085671 | 0.33  | 0.185 | 1           | 20 TERF1      |
| 1.44E-05   | 0.257820952 | 0.295 | 0.136 | 0.461190075 | 20 ZNF100     |
| 2.21E-06   | 0.257385041 | 0.727 | 0.429 | 0.070906353 | 20 AC093423.3 |
| 0.00015852 | 0.25690993  | 0.25  | 0.117 | 1           | 20 CFAP47     |
| 1.02E-09   | 0.256453035 | 0.455 | 0.173 | 3.28E-05    | 20 GDA        |
| 1.94E-23   | 0.256318398 | 0.705 | 0.194 | 6.22E-19    | 20 SLC36A2    |
| 4.28E-05   | 0.255170272 | 0.977 | 0.866 | 1           | 20 PATJ       |
| 7.61E-06   | 0.254861045 | 0.341 | 0.165 | 0.244513771 | 20 URGCP      |
| 4.05E-08   | 0.254853527 | 0.432 | 0.188 | 0.001299979 | 20 RECQL5     |
| 4.64E-05   | 0.254837025 | 0.784 | 0.519 | 1           | 20 HNRNPU     |
| 7.50E-05   | 0.254610516 | 0.443 | 0.257 | 1           | 20 B4GALT1    |
| 3.95E-06   | 0.254552571 | 0.318 | 0.143 | 0.126879016 | 20 SPTBN2     |
| 6.00E-05   | 0.254239979 | 0.83  | 0.575 | 1           | 20 NLK        |
| 0.00011964 | 0.253668448 | 0.42  | 0.238 | 1           | 20 ANKS1B     |
| 0.00051494 | 0.253147706 | 0.909 | 0.662 | 1           | 20 SAMD12     |
| 1.87E-18   | 0.252769033 | 0.864 | 0.346 | 6.02E-14    | 20 UGT1A8     |
| 4.65E-06   | 0.252491454 | 0.25  | 0.1   | 0.149426085 | 20 PLA2G4F    |
| 2.93E-10   | 0.252383821 | 0.409 | 0.154 | 9.42E-06    | 20 EMX2       |
| 8.94E-19   | 0.252215188 | 0.477 | 0.131 | 2.87E-14    | 20 AMN        |
| 0.00069981 | 0.251764276 | 0.989 | 0.822 | 1           | 20 TBC1D5     |
| 1.10E-07   | 0.2511776   | 0.307 | 0.119 | 0.00354467  | 20 AC127526.1 |
| 6.42E-15   | 0.250733044 | 0.307 | 0.076 | 2.06E-10    | 20 XPNPEP2    |
| 1.77E-06   | 0.250524668 | 0.341 | 0.152 | 0.056995235 | 20 POLR2H     |
| 2.19E-13   | 0.250113629 | 0.432 | 0.137 | 7.03E-09    | 20 LINC02275  |

**Table S2. Differentially expressed genes in scRNA-seq data ( $\log_2|\text{fold change}|>0.25$  and adjusted p-value<0.05)**

| gene       | p-value  | avg log <sub>2</sub> FC | pct.1 | pct.2 | adjust p-value | cell type |
|------------|----------|-------------------------|-------|-------|----------------|-----------|
| SLC12A3    | 1.30E-61 | -0.382273209            | 1     | 0.129 | 2.61E-58       | PODO      |
| LINGO2     | 1.32E-22 | -0.34676408             | 1     | 0.294 | 2.64E-19       | PODO      |
| KCNIP1     | 8.70E-20 | -0.334932087            | 0.996 | 0.304 | 1.74E-16       | PODO      |
| FGF13      | 9.91E-09 | -0.260470669            | 0.996 | 0.417 | 1.98E-05       | PODO      |
| PELI1      | 3.26E-65 | 0.252984475             | 0.996 | 0.117 | 6.51E-62       | PODO      |
| ACSM2B     | 4.08E-32 | -0.557811443            | 0.993 | 0.236 | 8.15E-29       | PODO      |
| NALCN      | 8.15E-14 | 0.309125411             | 0.989 | 0.411 | 1.63E-10       | PODO      |
| AC018742.1 | 4.09E-15 | 0.452736299             | 0.982 | 0.424 | 8.19E-12       | PODO      |
| CCN2       | 8.14E-10 | 0.365970116             | 0.968 | 0.472 | 1.63E-06       | PODO      |
| CLNK       | 1.41E-36 | -0.567228947            | 0.931 | 0.159 | 2.81E-33       | PODO      |
| SLIT2      | 8.51E-18 | -0.294436933            | 0.928 | 0.275 | 1.70E-14       | PODO      |
| ACTB       | 7.74E-11 | 0.664662266             | 0.906 | 0.453 | 1.55E-07       | PODO      |
| SLIT3      | 5.47E-17 | 0.255647006             | 0.892 | 0.272 | 1.09E-13       | PODO      |
| BANK1      | 2.42E-14 | 0.338276948             | 0.881 | 0.285 | 4.84E-11       | PODO      |
| ADGRF5     | 6.93E-23 | -0.37593369             | 0.877 | 0.184 | 1.39E-19       | PODO      |
| SNTB1      | 3.84E-19 | -0.263506864            | 0.845 | 0.175 | 7.68E-16       | PODO      |
| ATP6V0D2   | 1.90E-13 | -0.307086034            | 0.801 | 0.175 | 3.80E-10       | PODO      |
| ACSM2A     | 3.97E-06 | -0.471818938            | 0.798 | 0.269 | 0.007945421    | PODO      |
| PMEP A1    | 4.90E-06 | -0.262457361            | 0.552 | 0.388 | 0.009799083    | PODO      |
| SLC26A7    | 3.58E-07 | -0.830362513            | 0.542 | 0.346 | 0.000715405    | PODO      |
| DCN        | 2.66E-10 | -0.400619201            | 0.513 | 0.472 | 5.32E-07       | PODO      |
| SYN3       | 1.78E-07 | 0.455770989             | 0.469 | 0.324 | 0.000355011    | PODO      |
| SLC5A12    | 1.67E-06 | -0.287440639            | 0.455 | 0.155 | 0.003346585    | PODO      |
| PLCB1      | 3.09E-07 | 0.305965271             | 0.451 | 0.22  | 0.000618664    | PODO      |
| KCNIP4     | 5.94E-12 | -0.372446526            | 0.44  | 0.34  | 1.19E-08       | PODO      |
| LRP2       | 1.69E-11 | -0.259523329            | 0.437 | 0.304 | 3.39E-08       | PODO      |
| HELLPAR    | 3.03E-10 | 0.475109868             | 0.386 | 0.087 | 6.06E-07       | PODO      |
| UNC5D      | 4.93E-18 | 0.461077247             | 0.321 | 0.097 | 9.85E-15       | PODO      |
| TEX41      | 2.36E-24 | -0.29856002             | 0.31  | 0.172 | 4.72E-21       | PODO      |
| STAC       | 1.72E-37 | -0.27385747             | 0.242 | 0.23  | 3.45E-34       | PODO      |
| LHFPL3     | 3.58E-46 | -0.282512962            | 0.199 | 0.188 | 7.16E-43       | PODO      |
| GRIN2B     | 4.40E-45 | 0.310651519             | 0.191 | 0.052 | 8.81E-42       | PODO      |
| GLRA3      | 2.58E-68 | 0.303478562             | 0.108 | 0.013 | 5.16E-65       | PODO      |
| ATP10A     | 1.68E-09 | -0.415073429            | 1     | 0.404 | 3.35E-06       | PEC       |
| GADD45B    | 3.11E-21 | 0.300705415             | 1     | 0.344 | 6.23E-18       | PEC       |
| PDK4       | 2.63E-12 | -0.278459482            | 1     | 0.401 | 5.25E-09       | PEC       |
| GLUL       | 2.99E-08 | -0.507249244            | 0.994 | 0.423 | 5.97E-05       | PEC       |
| KCTD8      | 2.84E-12 | -0.457854585            | 0.994 | 0.372 | 5.69E-09       | PEC       |
| RASD1      | 2.79E-33 | -0.409516348            | 0.991 | 0.237 | 5.59E-30       | PEC       |
| RETREG1    | 1.83E-06 | 0.398658481             | 0.985 | 0.577 | 0.003651286    | PEC       |
| MT2A       | 1.32E-39 | -0.348805298            | 0.985 | 0.205 | 2.64E-36       | PEC       |
| TENM2      | 6.77E-18 | -0.267592897            | 0.985 | 0.331 | 1.35E-14       | PEC       |
| SQSTM1     | 5.37E-24 | 0.332927018             | 0.981 | 0.312 | 1.07E-20       | PEC       |
| PRKCB      | 1.97E-32 | -0.292153655            | 0.981 | 0.233 | 3.94E-29       | PEC       |
| RYR3       | 3.54E-06 | -0.43602208             | 0.978 | 0.432 | 0.007087008    | PEC       |
| TCF7L1     | 3.12E-08 | -0.267831458            | 0.978 | 0.413 | 6.24E-05       | PEC       |
| MICAL2     | 3.18E-12 | 0.459807298             | 0.969 | 0.442 | 6.35E-09       | PEC       |
| F5         | 2.28E-05 | -0.360432022            | 0.969 | 0.448 | 0.045562283    | PEC       |
| HMGCS1     | 1.68E-09 | -0.272569422            | 0.966 | 0.407 | 3.35E-06       | PEC       |
| PLOD2      | 2.73E-07 | 0.822185214             | 0.96  | 0.533 | 0.000546817    | PEC       |
| CCN1       | 9.44E-24 | -0.550438216            | 0.96  | 0.265 | 1.89E-20       | PEC       |
| AC109466.1 | 2.58E-13 | -1.12914806             | 0.954 | 0.334 | 5.17E-10       | PEC       |
| PTPRO      | 1.38E-21 | -0.260813634            | 0.951 | 0.287 | 2.76E-18       | PEC       |
| IGFBP4     | 1.27E-13 | 0.417324592             | 0.948 | 0.413 | 2.55E-10       | PEC       |
| GRIN2A     | 7.17E-37 | -0.269298585            | 0.944 | 0.183 | 1.43E-33       | PEC       |
| ST6GAL1    | 4.98E-08 | 0.290751804             | 0.935 | 0.438 | 9.96E-05       | PEC       |
| ADCY8      | 2.10E-39 | 0.419501385             | 0.929 | 0.17  | 4.19E-36       | PEC       |
| AC008415.1 | 3.82E-22 | -0.9803749              | 0.926 | 0.24  | 7.63E-19       | PEC       |

|            |          |              |       |       |                 |
|------------|----------|--------------|-------|-------|-----------------|
| NETO1      | 4.16E-41 | -0.261301688 | 0.92  | 0.145 | 8.32E-38 PEC    |
| MYO1B      | 2.82E-08 | 0.401852345  | 0.91  | 0.423 | 5.63E-05 PEC    |
| EYA4       | 1.30E-18 | -0.371630932 | 0.898 | 0.237 | 2.59E-15 PEC    |
| CRISPLD2   | 7.03E-13 | 0.601004327  | 0.895 | 0.369 | 1.41E-09 PEC    |
| FTCD       | 3.80E-39 | -0.289987055 | 0.892 | 0.123 | 7.59E-36 PEC    |
| PPP1R3C    | 1.47E-53 | -0.345514504 | 0.88  | 0.073 | 2.95E-50 PEC    |
| BMP6       | 1.28E-30 | -0.454752514 | 0.873 | 0.142 | 2.55E-27 PEC    |
| SNTG2      | 2.30E-10 | 0.271096591  | 0.867 | 0.328 | 4.61E-07 PEC    |
| EPS8       | 2.81E-07 | 0.446249114  | 0.852 | 0.461 | 0.000562646 PEC |
| EIF2AK3    | 8.61E-09 | 0.537494816  | 0.849 | 0.356 | 1.72E-05 PEC    |
| KHDRBS3    | 6.54E-13 | 0.400221187  | 0.849 | 0.278 | 1.31E-09 PEC    |
| LINC01876  | 3.54E-27 | 0.313133875  | 0.843 | 0.142 | 7.07E-24 PEC    |
| ATP1B3     | 2.44E-12 | 0.268099268  | 0.83  | 0.259 | 4.88E-09 PEC    |
| LINC00621  | 3.84E-22 | 0.529228605  | 0.815 | 0.155 | 7.68E-19 PEC    |
| TNFRSF21   | 1.04E-20 | 0.255177598  | 0.812 | 0.151 | 2.09E-17 PEC    |
| AC087633.2 | 8.87E-19 | 0.273168416  | 0.802 | 0.158 | 1.77E-15 PEC    |
| MMP26      | 2.26E-30 | -0.279081881 | 0.799 | 0.073 | 4.52E-27 PEC    |
| TP63       | 3.32E-12 | 0.302901732  | 0.793 | 0.205 | 6.64E-09 PEC    |
| MIOX       | 1.02E-18 | -0.29960028  | 0.787 | 0.123 | 2.03E-15 PEC    |
| SLC12A1    | 4.18E-10 | -0.277798643 | 0.775 | 0.196 | 8.36E-07 PEC    |
| SLC13A3    | 3.74E-14 | -0.261163993 | 0.765 | 0.136 | 7.47E-11 PEC    |
| SLC8A1-AS1 | 9.03E-07 | -0.28266517  | 0.747 | 0.208 | 0.001806225 PEC |
| HS6ST3     | 1.01E-05 | -0.285642373 | 0.704 | 0.161 | 0.020125041 PEC |
| MGP        | 1.22E-05 | -0.28248581  | 0.673 | 0.126 | 0.024426794 PEC |
| CNTNAP5    | 1.14E-08 | 0.256610966  | 0.66  | 0.06  | 2.27E-05 PEC    |
| ANKRD1     | 5.09E-16 | -0.279911766 | 0.657 | 0.05  | 1.02E-12 PEC    |
| IL32       | 1.37E-05 | 0.283055971  | 0.651 | 0.104 | 0.027337421 PEC |
| MIR2052HG  | 1.03E-07 | -0.271700983 | 0.651 | 0.063 | 0.000206101 PEC |
| AJ006995.1 | 4.12E-06 | 0.345824641  | 0.642 | 0.073 | 0.008234733 PEC |
| ALPK2      | 4.33E-06 | -0.405791664 | 0.602 | 0.533 | 0.00865889 PEC  |
| MROH9      | 8.16E-07 | 0.299389154  | 0.577 | 0.025 | 0.001632729 PEC |
| CLSTN2     | 1.61E-05 | -0.260892543 | 0.519 | 0.322 | 0.032279843 PEC |
| PCDH15     | 5.82E-06 | -0.379647359 | 0.494 | 0.227 | 0.01164148 PEC  |
| KCNIP4     | 4.33E-08 | -0.296051769 | 0.475 | 0.259 | 8.65E-05 PEC    |
| ACSM3      | 7.34E-08 | 0.344715124  | 0.472 | 0.363 | 0.000146813 PEC |
| ZNF331     | 2.46E-05 | 0.488466439  | 0.469 | 0.23  | 0.049146119 PEC |
| STXBP6     | 9.25E-06 | 0.330880467  | 0.444 | 0.136 | 0.018506188 PEC |
| NTRK3      | 9.07E-12 | -0.395004926 | 0.429 | 0.227 | 1.81E-08 PEC    |
| APBB1IP    | 2.42E-07 | 0.52542212   | 0.426 | 0.177 | 0.000484363 PEC |
| PIK3C2G    | 1.24E-08 | -0.31779165  | 0.42  | 0.114 | 2.48E-05 PEC    |
| AC079298.3 | 5.00E-10 | 0.563388234  | 0.401 | 0.161 | 1.00E-06 PEC    |
| AP1S3      | 1.85E-12 | 0.294041848  | 0.398 | 0.268 | 3.69E-09 PEC    |
| RELN       | 7.94E-13 | 0.461219027  | 0.395 | 0.224 | 1.59E-09 PEC    |
| LINC01428  | 8.95E-11 | 0.341718937  | 0.37  | 0.082 | 1.79E-07 PEC    |
| ELF3       | 4.51E-15 | 0.454281099  | 0.364 | 0.164 | 9.02E-12 PEC    |
| CRAT37     | 1.10E-08 | 0.329392993  | 0.364 | 0.066 | 2.20E-05 PEC    |
| LINC01098  | 5.80E-16 | -0.281854008 | 0.361 | 0.123 | 1.16E-12 PEC    |
| GBA3       | 1.94E-16 | 0.27791389   | 0.361 | 0.208 | 3.88E-13 PEC    |
| FOXP2      | 3.65E-14 | 0.598135759  | 0.358 | 0.132 | 7.30E-11 PEC    |
| ARMC4      | 2.27E-16 | 0.536326524  | 0.34  | 0.085 | 4.54E-13 PEC    |
| FOSB       | 1.19E-14 | 0.288872202  | 0.333 | 0.019 | 2.37E-11 PEC    |
| HBEGF      | 1.72E-14 | 0.396111805  | 0.321 | 0.05  | 3.44E-11 PEC    |
| SLC5A8     | 1.79E-21 | 0.321161512  | 0.302 | 0.041 | 3.59E-18 PEC    |
| NR4A2      | 1.22E-26 | 0.259854631  | 0.287 | 0.123 | 2.45E-23 PEC    |
| C3         | 4.44E-26 | 0.405642998  | 0.284 | 0.069 | 8.88E-23 PEC    |
| ZFPM2-AS1  | 1.81E-26 | 0.421751364  | 0.281 | 0.091 | 3.61E-23 PEC    |
| PIEZO2     | 1.70E-25 | 0.427030112  | 0.278 | 0.057 | 3.41E-22 PEC    |
| KCNQ5      | 3.59E-34 | 0.384009193  | 0.25  | 0.11  | 7.17E-31 PEC    |
| INHBA      | 2.90E-35 | 0.356743245  | 0.238 | 0.085 | 5.80E-32 PEC    |
| SOX4       | 5.43E-38 | 0.414388252  | 0.228 | 0.057 | 1.09E-34 PEC    |

|             |           |              |       |       |                 |
|-------------|-----------|--------------|-------|-------|-----------------|
| GEM         | 4.30E-43  | 0.262071395  | 0.207 | 0.05  | 8.59E-40 PEC    |
| SPATA18     | 5.00E-25  | 0.264477911  | 0.201 | 0.035 | 1.00E-21 PEC    |
| UGDH        | 1.20E-50  | 0.476140841  | 0.182 | 0.091 | 2.40E-47 PEC    |
| LAMC2       | 8.75E-52  | 0.380862727  | 0.176 | 0.066 | 1.75E-48 PEC    |
| CXCL2       | 6.73E-50  | 0.407848751  | 0.114 | 0.035 | 1.35E-46 PEC    |
| MIOX        | 9.00E-18  | -0.292504653 | 0.996 | 0.845 | 1.80E-14 PCT    |
| SOX5        | 1.84E-54  | -0.348484312 | 0.995 | 0.418 | 3.67E-51 PCT    |
| MT1H        | 5.88E-140 | -0.287842192 | 0.987 | 0.308 | 1.18E-136 PCT   |
| AFM         | 1.52E-06  | -0.356894332 | 0.975 | 0.736 | 0.003047291 PCT |
| TINAG       | 1.36E-07  | -0.253742199 | 0.972 | 0.808 | 0.000272633 PCT |
| MT1G        | 1.07E-102 | -0.414198254 | 0.971 | 0.33  | 2.14E-99 PCT    |
| SLC13A3     | 2.21E-08  | -0.259672977 | 0.968 | 0.834 | 4.41E-05 PCT    |
| AGXT2       | 1.36E-07  | -0.267893796 | 0.962 | 0.776 | 0.000271088 PCT |
| CRIM1       | 2.14E-56  | 0.50915156   | 0.959 | 0.504 | 4.27E-53 PCT    |
| MT1E        | 2.40E-157 | -0.25676659  | 0.952 | 0.26  | 4.81E-154 PCT   |
| SLC22A6     | 1.85E-06  | -0.333495905 | 0.949 | 0.761 | 0.003700529 PCT |
| TIPARP      | 1.72E-112 | -0.35296013  | 0.944 | 0.292 | 3.43E-109 PCT   |
| UPB1        | 1.19E-05  | -0.266268858 | 0.944 | 0.547 | 0.023846476 PCT |
| LINC02606   | 0         | -0.260479465 | 0.942 | 0.141 | 0 PCT           |
| GBA3        | 3.38E-44  | 0.271661901  | 0.933 | 0.465 | 6.76E-41 PCT    |
| CYP3A5      | 1.38E-05  | -0.535322877 | 0.921 | 0.723 | 0.027505295 PCT |
| LINC02499   | 7.29E-28  | -0.261977344 | 0.907 | 0.417 | 1.46E-24 PCT    |
| C1QTNF7-AS1 | 1.08E-36  | -0.304671656 | 0.898 | 0.379 | 2.16E-33 PCT    |
| PPFIBP1     | 1.66E-25  | 0.294629618  | 0.891 | 0.536 | 3.31E-22 PCT    |
| SEMA6A      | 2.77E-117 | 0.343732351  | 0.874 | 0.26  | 5.55E-114 PCT   |
| PLCB4       | 2.37E-214 | 0.291727186  | 0.873 | 0.148 | 4.73E-211 PCT   |
| CRYAB       | 1.08E-93  | 0.388247162  | 0.871 | 0.291 | 2.16E-90 PCT    |
| MT2A        | 1.15E-93  | -0.257519371 | 0.859 | 0.245 | 2.30E-90 PCT    |
| NAV3        | 4.46E-83  | -0.384232417 | 0.821 | 0.207 | 8.93E-80 PCT    |
| AC012593.1  | 1.04E-23  | 0.530947022  | 0.799 | 0.404 | 2.08E-20 PCT    |
| PLPPR1      | 1.01E-05  | -0.461363519 | 0.794 | 0.575 | 0.020171812 PCT |
| UBC         | 1.97E-51  | 0.264201761  | 0.786 | 0.253 | 3.94E-48 PCT    |
| NPAS3       | 2.43E-95  | 0.349606641  | 0.784 | 0.168 | 4.86E-92 PCT    |
| NEBL        | 1.85E-69  | 0.551330217  | 0.782 | 0.223 | 3.69E-66 PCT    |
| CACNA1E     | 4.04E-08  | -0.337348243 | 0.781 | 0.365 | 8.08E-05 PCT    |
| GPC4        | 3.92E-52  | 0.309733018  | 0.78  | 0.249 | 7.83E-49 PCT    |
| ARHGAP26    | 2.39E-08  | 0.278300279  | 0.78  | 0.483 | 4.79E-05 PCT    |
| TUBGCP3     | 5.88E-12  | 0.304664561  | 0.779 | 0.396 | 1.18E-08 PCT    |
| GRIP1       | 1.07E-15  | 0.322314121  | 0.761 | 0.371 | 2.15E-12 PCT    |
| KCNMB2      | 1.54E-10  | 0.275307725  | 0.746 | 0.357 | 3.08E-07 PCT    |
| COL4A1      | 6.19E-24  | 0.611735109  | 0.744 | 0.323 | 1.24E-20 PCT    |
| BICD1       | 1.41E-38  | 0.293815814  | 0.744 | 0.236 | 2.83E-35 PCT    |
| NRG3        | 3.71E-34  | 0.353869428  | 0.737 | 0.232 | 7.43E-31 PCT    |
| PHACTR1     | 9.38E-77  | 0.27014603   | 0.73  | 0.12  | 1.88E-73 PCT    |
| UGCG        | 2.79E-13  | 0.398938182  | 0.728 | 0.341 | 5.58E-10 PCT    |
| PLCB1       | 5.86E-26  | 0.283029036  | 0.728 | 0.253 | 1.17E-22 PCT    |
| AC098650.1  | 8.98E-29  | 0.323137167  | 0.723 | 0.229 | 1.80E-25 PCT    |
| AC011287.1  | 1.43E-06  | -0.461538722 | 0.715 | 0.272 | 0.002855048 PCT |
| BX571818.1  | 1.03E-07  | 0.393060438  | 0.713 | 0.371 | 0.000205574 PCT |
| SLC8A1      | 2.96E-09  | -0.493828872 | 0.702 | 0.449 | 5.92E-06 PCT    |
| SLC26A7     | 1.20E-10  | -0.486503635 | 0.698 | 0.22  | 2.40E-07 PCT    |
| ITGB8       | 8.47E-06  | 0.46231202   | 0.689 | 0.379 | 0.016937685 PCT |
| RGS6        | 1.26E-42  | 0.473439595  | 0.683 | 0.12  | 2.51E-39 PCT    |
| C8orf34     | 2.43E-75  | 0.263751064  | 0.671 | 0.054 | 4.85E-72 PCT    |
| CNTN5       | 1.66E-20  | 0.268646522  | 0.646 | 0.124 | 3.32E-17 PCT    |
| LINC01435   | 2.47E-38  | 0.267315296  | 0.643 | 0.063 | 4.95E-35 PCT    |
| LINC01876   | 4.88E-12  | -0.290998899 | 0.642 | 0.141 | 9.75E-09 PCT    |
| SGIP1       | 5.76E-47  | 0.439701055  | 0.641 | 0.044 | 1.15E-43 PCT    |
| ZNF385D     | 3.68E-10  | 0.32357369   | 0.64  | 0.167 | 7.35E-07 PCT    |
| ENAH        | 1.03E-07  | 0.304446533  | 0.62  | 0.157 | 0.000205335 PCT |

|             |           |              |       |       |                 |
|-------------|-----------|--------------|-------|-------|-----------------|
| SEL1L3      | 6.85E-07  | 0.369715951  | 0.617 | 0.165 | 0.001369588 PCT |
| LNC-LBCS    | 9.95E-06  | 0.295144591  | 0.605 | 0.139 | 0.019902488 PCT |
| ADGRL3      | 8.21E-15  | 0.39998926   | 0.604 | 0.076 | 1.64E-11 PCT    |
| PVT1        | 1.56E-10  | 0.322193597  | 0.568 | 0.087 | 3.12E-07 PCT    |
| KCNMA1      | 1.20E-10  | 0.315080474  | 0.553 | 0.044 | 2.40E-07 PCT    |
| MIR4435-2HG | 1.61E-11  | 0.281630918  | 0.52  | 0.223 | 3.22E-08 PCT    |
| AKAP12      | 5.73E-10  | 0.505227697  | 0.505 | 0.153 | 1.15E-06 PCT    |
| NLGN4Y      | 2.09E-14  | 0.286058187  | 0.501 | 0.188 | 4.17E-11 PCT    |
| RNF144B     | 2.96E-11  | 0.265169742  | 0.479 | 0.089 | 5.92E-08 PCT    |
| ALDH1A2     | 6.03E-19  | 0.622759193  | 0.472 | 0.136 | 1.21E-15 PCT    |
| AC005699.1  | 9.71E-14  | 0.279447762  | 0.471 | 0.11  | 1.94E-10 PCT    |
| CADM1       | 1.11E-25  | 0.359277669  | 0.464 | 0.161 | 2.22E-22 PCT    |
| SLIT3       | 6.94E-25  | 0.721671989  | 0.463 | 0.14  | 1.39E-21 PCT    |
| ROBO2       | 3.53E-50  | 0.447359584  | 0.43  | 0.171 | 7.06E-47 PCT    |
| ITGB6       | 3.50E-34  | 0.278178904  | 0.421 | 0.072 | 7.00E-31 PCT    |
| FOS         | 3.78E-29  | 0.270852282  | 0.421 | 0.04  | 7.57E-26 PCT    |
| DNAH5       | 1.35E-45  | 0.42815682   | 0.418 | 0.115 | 2.69E-42 PCT    |
| SATB2       | 1.39E-48  | 0.360965066  | 0.4   | 0.106 | 2.77E-45 PCT    |
| MIR31HG     | 2.59E-73  | 0.291118118  | 0.366 | 0.053 | 5.18E-70 PCT    |
| TNC         | 1.03E-16  | 0.252583643  | 0.364 | 0.021 | 2.07E-13 PCT    |
| HRH1        | 3.85E-32  | 0.279503503  | 0.361 | 0.023 | 7.70E-29 PCT    |
| KCNT2       | 3.94E-90  | 0.299185123  | 0.356 | 0.077 | 7.89E-87 PCT    |
| TSHZ2       | 1.58E-103 | 0.519431593  | 0.341 | 0.069 | 3.16E-100 PCT   |
| VCAM1       | 1.13E-116 | 0.357609606  | 0.337 | 0.109 | 2.25E-113 PCT   |
| SMAD9       | 1.82E-153 | 0.278694002  | 0.27  | 0.045 | 3.65E-150 PCT   |
| ZNF385D     | 8.92E-22  | -0.724978159 | 1     | 0.249 | 1.78E-18 MES    |
| FTCD        | 9.75E-43  | -0.63710001  | 1     | 0.122 | 1.95E-39 MES    |
| ACSM2B      | 5.06E-30  | -0.482221988 | 1     | 0.188 | 1.01E-26 MES    |
| GPAT3       | 4.77E-30  | -0.447896144 | 1     | 0.188 | 9.55E-27 MES    |
| AL390334.1  | 2.81E-13  | -0.358336223 | 1     | 0.326 | 5.61E-10 MES    |
| SLC8A1-AS1  | 2.65E-11  | 0.295460567  | 1     | 0.414 | 5.30E-08 MES    |
| PAH         | 6.01E-49  | -0.252179265 | 1     | 0.094 | 1.20E-45 MES    |
| NTRK2       | 1.59E-05  | -0.462331209 | 0.996 | 0.425 | 0.031774228 MES |
| MIOX        | 3.35E-47  | -0.416516334 | 0.996 | 0.099 | 6.71E-44 MES    |
| DDIT4       | 6.77E-43  | -0.400098862 | 0.996 | 0.116 | 1.35E-39 MES    |
| CTTNBP2     | 4.84E-21  | -0.371333239 | 0.996 | 0.243 | 9.67E-18 MES    |
| CACNA2D3    | 6.78E-07  | -0.329369776 | 0.996 | 0.409 | 0.001356022 MES |
| ERRF1       | 3.40E-08  | -0.308090483 | 0.996 | 0.387 | 6.81E-05 MES    |
| CELF2       | 3.33E-13  | -0.706585623 | 0.991 | 0.304 | 6.66E-10 MES    |
| TIPARP      | 7.72E-11  | -0.477052019 | 0.991 | 0.337 | 1.54E-07 MES    |
| PDGFD       | 9.91E-30  | -0.464023715 | 0.991 | 0.182 | 1.98E-26 MES    |
| TENM2       | 4.68E-30  | -0.456512795 | 0.987 | 0.177 | 9.37E-27 MES    |
| ADAMTS3     | 1.47E-25  | -1.145542855 | 0.983 | 0.204 | 2.95E-22 MES    |
| MT2A        | 7.15E-20  | -0.368981169 | 0.983 | 0.254 | 1.43E-16 MES    |
| ENTPD1      | 1.52E-28  | -0.358045526 | 0.983 | 0.188 | 3.04E-25 MES    |
| HRH1        | 4.59E-47  | -0.29641071  | 0.983 | 0.088 | 9.17E-44 MES    |
| ACSM2A      | 7.08E-21  | -0.558252362 | 0.974 | 0.232 | 1.42E-17 MES    |
| DCLK2       | 7.66E-26  | 0.27825457   | 0.974 | 0.21  | 1.53E-22 MES    |
| RALYL       | 3.06E-17  | -0.483210774 | 0.97  | 0.254 | 6.12E-14 MES    |
| PCSK5       | 2.36E-07  | -0.563995743 | 0.966 | 0.376 | 0.000471445 MES |
| CLNK        | 5.91E-33  | -0.303043704 | 0.962 | 0.138 | 1.18E-29 MES    |
| FOXP2       | 2.01E-17  | -0.736185317 | 0.957 | 0.238 | 4.02E-14 MES    |
| LDB2        | 6.97E-10  | 0.539836889  | 0.957 | 0.425 | 1.39E-06 MES    |
| PALMD       | 4.33E-30  | -0.537220792 | 0.957 | 0.149 | 8.66E-27 MES    |
| SLC26A7     | 2.36E-25  | -0.284016403 | 0.957 | 0.188 | 4.71E-22 MES    |
| TINAG       | 2.83E-36  | -0.276339896 | 0.957 | 0.116 | 5.66E-33 MES    |
| AC092078.2  | 3.45E-50  | -0.415821407 | 0.953 | 0.061 | 6.91E-47 MES    |
| SLC12A3     | 7.89E-33  | -0.314964415 | 0.953 | 0.133 | 1.58E-29 MES    |
| A2M         | 8.53E-06  | 0.701536492  | 0.944 | 0.486 | 0.017057768 MES |
| CLIC5       | 1.08E-24  | -0.562375595 | 0.944 | 0.171 | 2.17E-21 MES    |

|            |          |              |       |       |                 |
|------------|----------|--------------|-------|-------|-----------------|
| KCNB1      | 5.48E-24 | -0.333056451 | 0.944 | 0.204 | 1.10E-20 MES    |
| ANO3       | 3.68E-09 | 0.57732946   | 0.94  | 0.365 | 7.35E-06 MES    |
| LINC00871  | 1.74E-29 | -0.37791979  | 0.94  | 0.138 | 3.48E-26 MES    |
| GALNT13    | 8.17E-44 | -0.328395405 | 0.94  | 0.061 | 1.63E-40 MES    |
| LINC01435  | 1.84E-22 | -0.640408739 | 0.936 | 0.182 | 3.68E-19 MES    |
| AC007744.1 | 2.73E-33 | -0.379448762 | 0.936 | 0.11  | 5.46E-30 MES    |
| FHL1       | 2.31E-12 | -0.312292164 | 0.936 | 0.282 | 4.63E-09 MES    |
| MGAT4C     | 5.28E-26 | -0.396312911 | 0.91  | 0.133 | 1.06E-22 MES    |
| MT1M       | 7.83E-47 | -0.516781714 | 0.906 | 0.066 | 1.57E-43 MES    |
| DPYSL3     | 4.51E-15 | -0.462712406 | 0.897 | 0.21  | 9.01E-12 MES    |
| AC026316.4 | 9.13E-20 | -0.961167806 | 0.893 | 0.16  | 1.83E-16 MES    |
| RARB       | 1.98E-06 | 0.506395363  | 0.885 | 0.42  | 0.003959049 MES |
| ADRA1A     | 6.77E-12 | -0.490032405 | 0.88  | 0.271 | 1.35E-08 MES    |
| NEBL       | 1.72E-10 | -0.259204493 | 0.872 | 0.243 | 3.45E-07 MES    |
| RYR3       | 6.99E-21 | -0.437112157 | 0.863 | 0.122 | 1.40E-17 MES    |
| CCDC39     | 3.74E-22 | -0.360614449 | 0.863 | 0.11  | 7.48E-19 MES    |
| NPSR1-AS1  | 6.42E-24 | -0.292756119 | 0.863 | 0.099 | 1.28E-20 MES    |
| OPCML      | 4.91E-16 | 0.272390041  | 0.863 | 0.177 | 9.81E-13 MES    |
| F3         | 9.43E-31 | -0.499989403 | 0.859 | 0.127 | 1.89E-27 MES    |
| KCNB2      | 4.31E-18 | -0.356127149 | 0.859 | 0.144 | 8.63E-15 MES    |
| CRYAB      | 3.92E-21 | -0.605097015 | 0.855 | 0.11  | 7.84E-18 MES    |
| IL1RAPL2   | 2.10E-17 | 0.480568666  | 0.855 | 0.16  | 4.20E-14 MES    |
| POSTN      | 5.37E-12 | -0.451440251 | 0.85  | 0.193 | 1.07E-08 MES    |
| ITPKC      | 6.07E-17 | -0.837444195 | 0.842 | 0.133 | 1.21E-13 MES    |
| PTPRQ      | 2.16E-09 | -0.545753483 | 0.842 | 0.215 | 4.33E-06 MES    |
| SEMA3C     | 1.09E-09 | -0.331305857 | 0.842 | 0.227 | 2.19E-06 MES    |
| UAP1       | 3.73E-10 | -0.33033369  | 0.833 | 0.199 | 7.47E-07 MES    |
| CNTN5      | 2.40E-06 | 0.714839095  | 0.825 | 0.271 | 0.004796537 MES |
| BTG2       | 5.32E-08 | -0.503568041 | 0.821 | 0.221 | 0.000106419 MES |
| DEPTOR     | 1.35E-06 | -0.264472527 | 0.812 | 0.232 | 0.002709018 MES |
| CADM2      | 3.00E-19 | 0.403634328  | 0.808 | 0.077 | 6.00E-16 MES    |
| NTN1       | 2.09E-09 | -0.620221789 | 0.803 | 0.171 | 4.18E-06 MES    |
| MT1X       | 3.85E-16 | -0.41649748  | 0.803 | 0.099 | 7.70E-13 MES    |
| COL4A6     | 5.75E-12 | -0.298572129 | 0.799 | 0.149 | 1.15E-08 MES    |
| H19        | 9.19E-39 | -0.290841964 | 0.799 | 0.061 | 1.84E-35 MES    |
| FBLN5      | 2.99E-15 | 0.28243371   | 0.791 | 0.105 | 5.97E-12 MES    |
| DACH1      | 2.86E-06 | 0.519938592  | 0.786 | 0.254 | 0.005711856 MES |
| KLF5       | 3.69E-15 | -0.394810849 | 0.782 | 0.088 | 7.38E-12 MES    |
| FMN2       | 6.10E-11 | -0.291044828 | 0.778 | 0.127 | 1.22E-07 MES    |
| NCAM2      | 5.21E-34 | 0.272470251  | 0.778 | 0.061 | 1.04E-30 MES    |
| AC104041.1 | 1.72E-24 | 0.296947531  | 0.769 | 0.022 | 3.43E-21 MES    |
| H3-3B      | 6.89E-07 | -0.265288455 | 0.769 | 0.182 | 0.001378144 MES |
| ADGRF5     | 1.51E-05 | 0.444628201  | 0.765 | 0.238 | 0.030269048 MES |
| IL18       | 3.48E-15 | -0.263117468 | 0.752 | 0.055 | 6.95E-12 MES    |
| LINC02237  | 2.09E-23 | 0.421079516  | 0.744 | 0.044 | 4.18E-20 MES    |
| ANKRD33B   | 5.80E-10 | -0.369384907 | 0.744 | 0.099 | 1.16E-06 MES    |
| HECW1      | 9.25E-13 | 0.310023697  | 0.731 | 0.05  | 1.85E-09 MES    |
| LINC02511  | 1.50E-34 | -0.471430549 | 0.722 | 0.044 | 3.00E-31 MES    |
| PURPL      | 5.53E-11 | -0.275888762 | 0.718 | 0.055 | 1.11E-07 MES    |
| LINC02398  | 3.98E-10 | 0.371990645  | 0.714 | 0.066 | 7.96E-07 MES    |
| DUSP5      | 1.20E-08 | -0.259473045 | 0.709 | 0.077 | 2.41E-05 MES    |
| UMOD       | 9.91E-08 | -0.31048094  | 0.701 | 0.077 | 0.000198294 MES |
| GFRA1      | 2.75E-07 | 0.415831242  | 0.671 | 0.05  | 0.000549382 MES |
| DEPP1      | 2.80E-06 | -0.369537262 | 0.667 | 0.072 | 0.005597703 MES |
| PAK3       | 2.34E-06 | -0.59751563  | 0.658 | 0.16  | 0.004686541 MES |
| AOX1       | 2.34E-13 | -0.754587163 | 0.641 | 0.16  | 4.69E-10 MES    |
| IGFBP6     | 5.62E-08 | -0.485381619 | 0.598 | 0.066 | 0.000112381 MES |
| KDR        | 8.51E-07 | -0.259140884 | 0.577 | 0.066 | 0.001701169 MES |
| KCNMA1     | 6.31E-06 | -0.347798532 | 0.474 | 0.265 | 0.012616127 MES |
| AL137782.1 | 2.82E-07 | -0.263719628 | 0.449 | 0.309 | 0.000564531 MES |

|            |          |              |       |       |                 |
|------------|----------|--------------|-------|-------|-----------------|
| NID1       | 2.20E-05 | 0.252722629  | 0.444 | 0.232 | 0.043998951 MES |
| HSPA1B     | 2.68E-06 | -0.404684541 | 0.44  | 0.221 | 0.005351142 MES |
| CD9        | 2.68E-06 | -0.342331494 | 0.423 | 0.149 | 0.00536058 MES  |
| CRISPLD2   | 2.31E-05 | 0.313469169  | 0.423 | 0.16  | 0.046141343 MES |
| KCNE4      | 1.25E-05 | 0.301424926  | 0.415 | 0.16  | 0.024923457 MES |
| MSC-AS1    | 4.20E-06 | 0.477561271  | 0.41  | 0.144 | 0.008390964 MES |
| HSPB1      | 1.71E-07 | -0.353000781 | 0.406 | 0.171 | 0.000341169 MES |
| ATF3       | 3.27E-08 | -0.736582341 | 0.402 | 0.155 | 6.54E-05 MES    |
| FGF2       | 7.90E-06 | 0.256676794  | 0.402 | 0.077 | 0.015798059 MES |
| SLC2A3     | 6.29E-06 | 0.890967659  | 0.397 | 0.116 | 0.012580151 MES |
| LINC01098  | 1.70E-06 | 0.441024514  | 0.393 | 0.072 | 0.003390387 MES |
| GALNT17    | 7.59E-10 | -0.354051986 | 0.385 | 0.177 | 1.52E-06 MES    |
| STIM2      | 2.55E-12 | -0.391816034 | 0.38  | 0.254 | 5.10E-09 MES    |
| AC009975.1 | 5.42E-07 | 0.375202255  | 0.38  | 0.061 | 0.001083173 MES |
| SPP1       | 5.53E-08 | -0.308271354 | 0.38  | 0.088 | 0.000110595 MES |
| LDHA       | 2.42E-07 | -0.353998943 | 0.372 | 0.055 | 0.000484181 MES |
| FHL2       | 1.08E-09 | 0.297806486  | 0.372 | 0.238 | 2.16E-06 MES    |
| ANKRD55    | 6.45E-07 | 0.270913165  | 0.372 | 0.028 | 0.001289744 MES |
| ATP2B4     | 1.08E-13 | -0.457257718 | 0.368 | 0.315 | 2.15E-10 MES    |
| DACH2      | 7.53E-09 | 0.307401192  | 0.363 | 0.077 | 1.51E-05 MES    |
| RXFP1      | 1.92E-08 | 0.402869832  | 0.359 | 0.05  | 3.85E-05 MES    |
| AC093865.1 | 1.88E-09 | -0.311357844 | 0.359 | 0.077 | 3.76E-06 MES    |
| EEPD1      | 7.58E-10 | 0.624311857  | 0.35  | 0.122 | 1.52E-06 MES    |
| SORCS3     | 9.20E-12 | -0.362347664 | 0.35  | 0.122 | 1.84E-08 MES    |
| NR4A3      | 1.90E-11 | 0.466392337  | 0.342 | 0.155 | 3.80E-08 MES    |
| PIK3R3     | 1.90E-10 | 0.330456665  | 0.338 | 0.044 | 3.81E-07 MES    |
| VCAM1      | 4.31E-11 | 0.551498037  | 0.333 | 0.055 | 8.61E-08 MES    |
| GEM        | 6.77E-12 | 0.652194535  | 0.329 | 0.116 | 1.35E-08 MES    |
| TMTC2      | 1.11E-13 | 0.276165673  | 0.329 | 0.166 | 2.23E-10 MES    |
| ZNF804A    | 2.88E-12 | 0.626318812  | 0.325 | 0.066 | 5.75E-09 MES    |
| CD44       | 4.49E-13 | 0.417060303  | 0.325 | 0.138 | 8.99E-10 MES    |
| ARHGAP15   | 8.91E-13 | 0.408264003  | 0.321 | 0.077 | 1.78E-09 MES    |
| FAM155A    | 3.43E-16 | -0.448841793 | 0.316 | 0.193 | 6.87E-13 MES    |
| ADAMTS12   | 1.93E-12 | 0.506141674  | 0.312 | 0.033 | 3.86E-09 MES    |
| SEMA3E     | 1.81E-09 | -0.358440319 | 0.308 | 0.039 | 3.61E-06 MES    |
| NRK        | 6.61E-16 | -0.33102184  | 0.303 | 0.099 | 1.32E-12 MES    |
| RHOJ       | 2.84E-14 | 0.310296427  | 0.299 | 0.105 | 5.69E-11 MES    |
| KIRREL3    | 1.62E-05 | 0.550907222  | 0.282 | 0.017 | 0.032356607 MES |
| PDLIM3     | 6.02E-18 | -0.259557558 | 0.282 | 0.133 | 1.20E-14 MES    |
| DTNA       | 4.10E-20 | -0.427693684 | 0.278 | 0.177 | 8.20E-17 MES    |
| BIRC3      | 3.05E-17 | 0.276746182  | 0.269 | 0.022 | 6.10E-14 MES    |
| AL357507.1 | 2.38E-22 | -0.317190303 | 0.252 | 0.099 | 4.75E-19 MES    |
| BHLHE40    | 1.26E-21 | 0.278052615  | 0.252 | 0.099 | 2.52E-18 MES    |
| AL359232.1 | 1.21E-21 | 0.291997999  | 0.248 | 0.072 | 2.43E-18 MES    |
| LINC00278  | 8.22E-22 | 0.502613363  | 0.239 | 0.05  | 1.64E-18 MES    |
| SLCO2A1    | 6.29E-25 | 0.40441537   | 0.226 | 0.083 | 1.26E-21 MES    |
| VCAN       | 1.52E-16 | 0.717351337  | 0.214 | 0.066 | 3.04E-13 MES    |
| EGR3       | 1.47E-19 | 0.268797285  | 0.214 | 0.011 | 2.93E-16 MES    |
| NLGN4Y     | 5.07E-29 | 0.375976226  | 0.197 | 0.055 | 1.01E-25 MES    |
| NKAIN2     | 1.04E-30 | 0.254357304  | 0.197 | 0.138 | 2.09E-27 MES    |
| RGS16      | 4.22E-29 | 0.574536     | 0.188 | 0.017 | 8.45E-26 MES    |
| PECAM1     | 6.53E-31 | 0.38766502   | 0.188 | 0.072 | 1.31E-27 MES    |
| HCLS1      | 7.29E-18 | 0.340272058  | 0.171 | 0.022 | 1.46E-14 MES    |
| REN        | 8.31E-33 | 0.486865535  | 0.167 | 0.066 | 1.66E-29 MES    |
| KLF2       | 5.32E-36 | -0.280262489 | 0.167 | 0.133 | 1.06E-32 MES    |
| TMEM178B   | 5.29E-30 | 0.321734576  | 0.158 | 0.061 | 1.06E-26 MES    |
| MUSK       | 4.53E-13 | 0.398699647  | 0.145 | 0.039 | 9.06E-10 MES    |
| SLC25A21   | 2.98E-41 | -0.296162728 | 0.137 | 0.105 | 5.95E-38 MES    |
| P3H2       | 3.87E-06 | -0.272954573 | 0.999 | 0.855 | 0.007745319 LOH |
| P4HA1      | 1.17E-07 | -0.415615877 | 0.998 | 0.535 | 0.000234835 LOH |



|             |           |              |       |       |                  |
|-------------|-----------|--------------|-------|-------|------------------|
| CYTIP       | 7.15E-104 | -0.342043603 | 0.996 | 0.292 | 1.43E-100 LOH    |
| KLHL13      | 4.29E-06  | 0.280891615  | 0.996 | 0.915 | 0.008588506 LOH  |
| CDH20       | 4.31E-132 | -0.357491614 | 0.994 | 0.272 | 8.62E-129 LOH    |
| FP671120.4  | 1.47E-05  | 0.362944837  | 0.991 | 0.986 | 0.029435022 LOH  |
| SORCS3      | 2.96E-37  | -0.290145102 | 0.986 | 0.411 | 5.92E-34 LOH     |
| AC069277.1  | 1.30E-165 | -0.259223907 | 0.986 | 0.23  | 2.60E-162 LOH    |
| COL8A1      | 1.39E-30  | -0.772814083 | 0.983 | 0.43  | 2.78E-27 LOH     |
| BDKRB2      | 7.21E-08  | -0.300514426 | 0.981 | 0.515 | 0.000144116 LOH  |
| CREB3L2     | 4.00E-06  | -0.377180305 | 0.967 | 0.759 | 0.007995816 LOH  |
| LINC01055   | 4.50E-157 | -0.342043514 | 0.966 | 0.218 | 9.00E-154 LOH    |
| TMEM132C    | 2.86E-69  | -0.713400012 | 0.961 | 0.316 | 5.72E-66 LOH     |
| ACTN1       | 5.89E-44  | -0.301913896 | 0.961 | 0.368 | 1.18E-40 LOH     |
| GPR137B     | 4.55E-36  | -0.266072097 | 0.959 | 0.372 | 9.10E-33 LOH     |
| MIR222HG    | 8.04E-44  | -0.441400746 | 0.951 | 0.371 | 1.61E-40 LOH     |
| TRPM7       | 1.24E-05  | 0.265561712  | 0.945 | 0.789 | 0.024843826 LOH  |
| CACNA1C     | 1.80E-53  | -0.35388708  | 0.928 | 0.323 | 3.60E-50 LOH     |
| SLC8A1      | 4.04E-27  | 0.319993134  | 0.918 | 0.398 | 8.08E-24 LOH     |
| HOMER1      | 5.13E-07  | -0.435656716 | 0.914 | 0.525 | 0.00102622 LOH   |
| ACSM2B      | 1.73E-115 | -0.397868617 | 0.885 | 0.193 | 3.45E-112 LOH    |
| CPNE4       | 3.94E-54  | -0.380300505 | 0.872 | 0.271 | 7.88E-51 LOH     |
| MIR646HG    | 1.30E-19  | -0.272686191 | 0.85  | 0.356 | 2.61E-16 LOH     |
| KCNQ3       | 1.20E-137 | -0.252122146 | 0.845 | 0.131 | 2.41E-134 LOH    |
| S100A2      | 1.51E-45  | -0.263809155 | 0.835 | 0.253 | 3.02E-42 LOH     |
| IL1RAPL2    | 5.72E-14  | -0.307809549 | 0.809 | 0.345 | 1.14E-10 LOH     |
| MIOX        | 5.17E-98  | -0.313740215 | 0.79  | 0.113 | 1.03E-94 LOH     |
| ACSM2A      | 3.50E-22  | -0.353470286 | 0.742 | 0.22  | 7.00E-19 LOH     |
| PXDNL       | 3.28E-12  | 0.295263894  | 0.688 | 0.252 | 6.57E-09 LOH     |
| LINC01811   | 3.14E-30  | 0.441187821  | 0.679 | 0.114 | 6.28E-27 LOH     |
| RGS6        | 1.60E-09  | 0.373146219  | 0.628 | 0.155 | 3.20E-06 LOH     |
| SLC8A1-AS1  | 4.22E-06  | 0.301691041  | 0.627 | 0.151 | 0.008432763 LOH  |
| DLGAP1      | 2.10E-26  | 0.251664713  | 0.454 | 0.166 | 4.19E-23 LOH     |
| AC005699.1  | 2.80E-25  | 0.313461016  | 0.435 | 0.114 | 5.60E-22 LOH     |
| AC008415.1  | 1.88E-47  | 0.437363355  | 0.362 | 0.028 | 3.76E-44 LOH     |
| GRM8        | 1.63E-145 | 0.382092944  | 0.262 | 0.06  | 3.25E-142 LOH    |
| PLXNA4      | 2.26E-09  | -1.41        | 1     | 0.1   | 4.53E-06 LEUK    |
| CYP3A5      | 5.44E-10  | 1.035316902  | 1     | 0.1   | 1.09E-06 LEUK    |
| LINC00276   | 1.83E-11  | -0.600927895 | 1     | 0.05  | 3.66E-08 LEUK    |
| PRODH2      | 1.83E-11  | -0.563137462 | 1     | 0.05  | 3.66E-08 LEUK    |
| SLC17A1     | 5.60E-06  | -0.548231638 | 1     | 0.2   | 0.011190632 LEUK |
| NPL         | 1.20E-07  | -0.4667297   | 1     | 0.15  | 0.000240232 LEUK |
| HMOX1       | 1.54E-07  | -0.456792269 | 1     | 0.15  | 0.000308923 LEUK |
| NOX4        | 1.37E-07  | -0.445031283 | 1     | 0.15  | 0.000274514 LEUK |
| PPARG       | 2.08E-09  | -0.427432154 | 1     | 0.1   | 4.17E-06 LEUK    |
| AC096577.1  | 1.42E-09  | 0.403173336  | 1     | 0.1   | 2.83E-06 LEUK    |
| C1QTNF7-AS1 | 1.55E-11  | 0.399586017  | 1     | 0.05  | 3.09E-08 LEUK    |
| PLCXD3      | 1.57E-07  | -0.39945464  | 1     | 0.15  | 0.000313507 LEUK |
| LINC02196   | 1.95E-09  | -0.367963491 | 1     | 0.1   | 3.90E-06 LEUK    |
| LRP2        | 2.91E-06  | -0.360835033 | 1     | 0.2   | 0.005825164 LEUK |
| DPYS        | 1.83E-11  | -0.359097491 | 1     | 0.05  | 3.66E-08 LEUK    |
| ACSM2B      | 1.90E-06  | 0.346737641  | 1     | 0.2   | 0.003800073 LEUK |
| FAM110B     | 4.61E-06  | -0.323993193 | 1     | 0.2   | 0.009217213 LEUK |
| RHCG        | 1.83E-11  | -0.296120072 | 1     | 0.05  | 3.66E-08 LEUK    |
| SLC4A4      | 2.26E-06  | 0.291271547  | 1     | 0.2   | 0.004524172 LEUK |
| SFRP1       | 2.26E-09  | -0.286540469 | 1     | 0.1   | 4.53E-06 LEUK    |
| CACNB4      | 2.12E-09  | -0.285484872 | 1     | 0.1   | 4.24E-06 LEUK    |
| LINC00871   | 1.46E-07  | -0.281344943 | 1     | 0.15  | 0.000291227 LEUK |
| AC116049.1  | 1.83E-11  | -0.272012804 | 1     | 0.05  | 3.66E-08 LEUK    |
| LINC00621   | 1.58E-11  | 0.270854703  | 1     | 0.05  | 3.15E-08 LEUK    |
| MT1G        | 1.64E-11  | 0.268195805  | 1     | 0.05  | 3.27E-08 LEUK    |
| LINC00671   | 1.64E-11  | 0.263623205  | 1     | 0.05  | 3.27E-08 LEUK    |

|            |          |                    |      |                  |
|------------|----------|--------------------|------|------------------|
| PODXL      | 2.08E-09 | -0.251755676 1     | 0.1  | 4.17E-06 LEUK    |
| LINGO2     | 1.64E-07 | -0.980603534 0.996 | 0.15 | 0.000327656 LEUK |
| LONRF3     | 3.00E-09 | -0.817741304 0.996 | 0.1  | 6.00E-06 LEUK    |
| SOX5       | 4.30E-08 | 0.791989996 0.996  | 0.15 | 8.61E-05 LEUK    |
| NLRP3      | 1.63E-07 | -0.679645893 0.996 | 0.15 | 0.000325091 LEUK |
| NRP1       | 4.67E-06 | -0.660188982 0.996 | 0.2  | 0.009337663 LEUK |
| AGXT2      | 7.51E-06 | -0.624381965 0.996 | 0.2  | 0.015021043 LEUK |
| MIOX       | 2.90E-09 | -0.589786629 0.996 | 0.1  | 5.81E-06 LEUK    |
| AC018742.1 | 2.08E-11 | 0.549629102 0.996  | 0.05 | 4.17E-08 LEUK    |
| TIPARP     | 7.23E-06 | -0.496422981 0.996 | 0.2  | 0.01445829 LEUK  |
| PLIN2      | 1.25E-13 | 0.325404593 0.996  | 0    | 2.50E-10 LEUK    |
| AL355499.1 | 2.55E-11 | -0.308419774 0.996 | 0.05 | 5.11E-08 LEUK    |
| HNF4A      | 2.55E-11 | -0.302932044 0.996 | 0.05 | 5.11E-08 LEUK    |
| H1-0       | 2.14E-11 | -0.287079114 0.996 | 0.05 | 4.28E-08 LEUK    |
| ENPEP      | 2.72E-09 | -0.262405052 0.996 | 0.1  | 5.44E-06 LEUK    |
| GUCY1A2    | 2.86E-09 | -0.250870952 0.996 | 0.1  | 5.71E-06 LEUK    |
| Z93403.1   | 1.88E-13 | 0.593596869 0.993  | 0    | 3.75E-10 LEUK    |
| TNFRSF19   | 4.24E-09 | -0.519706864 0.993 | 0.1  | 8.48E-06 LEUK    |
| MT2A       | 1.88E-13 | 0.465861979 0.993  | 0    | 3.75E-10 LEUK    |
| ALDOB      | 1.53E-13 | 0.414980154 0.993  | 0    | 3.06E-10 LEUK    |
| PPP1R1C    | 4.10E-09 | -0.395648129 0.993 | 0.1  | 8.21E-06 LEUK    |
| SLC30A8    | 3.54E-09 | -0.357895827 0.993 | 0.1  | 7.08E-06 LEUK    |
| DLEU1      | 1.82E-07 | -0.343510472 0.993 | 0.15 | 0.000363114 LEUK |
| ITPKC      | 4.10E-09 | -0.265574388 0.993 | 0.1  | 8.21E-06 LEUK    |
| AC011287.1 | 5.00E-09 | -0.69988891 0.989  | 0.1  | 9.99E-06 LEUK    |
| AC093895.1 | 4.91E-09 | -0.529935044 0.989 | 0.1  | 9.82E-06 LEUK    |
| TMEM178A   | 3.49E-07 | -0.52470517 0.989  | 0.15 | 0.000697084 LEUK |
| TNFRSF21   | 5.00E-09 | -0.318083135 0.989 | 0.1  | 9.99E-06 LEUK    |
| STAP1      | 3.52E-11 | 0.598365694 0.985  | 0.05 | 7.03E-08 LEUK    |
| SLC22A6    | 4.21E-13 | 0.407215859 0.985  | 0    | 8.42E-10 LEUK    |
| SMIM35     | 1.02E-08 | -0.631122232 0.982 | 0.1  | 2.03E-05 LEUK    |
| CXXC4-AS1  | 6.27E-13 | 0.467485867 0.982  | 0    | 1.25E-09 LEUK    |
| SCN1A-AS1  | 1.00E-08 | -0.456406136 0.982 | 0.1  | 2.00E-05 LEUK    |
| RHOBTB3    | 9.50E-11 | 0.3108764 0.982    | 0.05 | 1.90E-07 LEUK    |
| GK         | 1.04E-05 | -0.259829933 0.982 | 0.2  | 0.020857461 LEUK |
| ACSM2A     | 4.02E-07 | 0.50266789 0.978   | 0.15 | 0.000804221 LEUK |
| AL136114.1 | 1.46E-10 | -0.339706281 0.978 | 0.05 | 2.92E-07 LEUK    |
| PKN2-AS1   | 1.46E-10 | -0.300189725 0.978 | 0.05 | 2.92E-07 LEUK    |
| AJ009632.2 | 1.46E-10 | -0.252499233 0.978 | 0.05 | 2.92E-07 LEUK    |
| AC003984.1 | 8.77E-09 | -0.928492787 0.975 | 0.1  | 1.75E-05 LEUK    |
| AKAP12     | 1.65E-10 | 0.331326093 0.975  | 0.05 | 3.31E-07 LEUK    |
| LINC01239  | 1.38E-12 | 0.304256341 0.975  | 0    | 2.77E-09 LEUK    |
| AL391117.1 | 1.38E-12 | 0.250869526 0.975  | 0    | 2.77E-09 LEUK    |
| PLCE1      | 1.01E-06 | -1.066547292 0.971 | 0.15 | 0.00202955 LEUK  |
| CCL4       | 5.16E-07 | -1.219670775 0.967 | 0.15 | 0.001032736 LEUK |
| SGCD       | 3.98E-08 | -1.250126801 0.964 | 0.1  | 7.96E-05 LEUK    |
| LINC01229  | 4.43E-12 | 0.389016599 0.964  | 0    | 8.85E-09 LEUK    |
| MT1E       | 3.00E-12 | 0.349300971 0.964  | 0    | 6.01E-09 LEUK    |
| ADTRP      | 9.75E-09 | -0.308458399 0.964 | 0.1  | 1.95E-05 LEUK    |
| LINC00484  | 3.63E-08 | -0.250807034 0.964 | 0.1  | 7.26E-05 LEUK    |
| LINC01503  | 7.67E-10 | -0.353319507 0.96  | 0.05 | 1.53E-06 LEUK    |
| DCC        | 9.42E-10 | 0.553825266 0.956  | 0.05 | 1.88E-06 LEUK    |
| AL031599.1 | 1.06E-09 | -0.353050597 0.956 | 0.05 | 2.12E-06 LEUK    |
| RGS2       | 1.76E-08 | -0.299029988 0.956 | 0.1  | 3.51E-05 LEUK    |
| ALDH1A1    | 9.48E-12 | 0.257717254 0.956  | 0    | 1.90E-08 LEUK    |
| MCF2       | 1.42E-08 | -0.311656039 0.953 | 0.1  | 2.84E-05 LEUK    |
| LINC01197  | 1.06E-09 | -0.252308105 0.953 | 0.05 | 2.12E-06 LEUK    |
| LINC00189  | 2.00E-10 | -0.518911364 0.949 | 0.05 | 4.00E-07 LEUK    |
| SLC14A2    | 2.90E-11 | 0.455654867 0.945  | 0    | 5.81E-08 LEUK    |
| KCNT2      | 1.22E-09 | -0.32967708 0.942  | 0.05 | 2.43E-06 LEUK    |

|            |          |              |       |      |                  |
|------------|----------|--------------|-------|------|------------------|
| PLG        | 4.20E-11 | 0.311263291  | 0.942 | 0    | 8.39E-08 LEUK    |
| CPED1      | 2.26E-06 | 0.764309485  | 0.938 | 0.15 | 0.004522498 LEUK |
| CHN1       | 7.23E-06 | -0.442527689 | 0.938 | 0.15 | 0.014453453 LEUK |
| PPP4R4     | 3.27E-10 | -0.36252145  | 0.938 | 0.05 | 6.54E-07 LEUK    |
| MRC1       | 5.34E-06 | -0.268439832 | 0.938 | 0.15 | 0.010689067 LEUK |
| LY86-AS1   | 1.75E-06 | 1.304085987  | 0.935 | 0.15 | 0.003503415 LEUK |
| APCDD1L    | 2.30E-09 | -0.293472842 | 0.935 | 0.05 | 4.60E-06 LEUK    |
| LINC00298  | 6.80E-08 | -0.688873091 | 0.931 | 0.1  | 0.000135985 LEUK |
| PTP4A1     | 1.12E-05 | -0.26206755  | 0.927 | 0.15 | 0.022328306 LEUK |
| LDB2       | 1.65E-05 | -0.298632071 | 0.924 | 0.15 | 0.032992973 LEUK |
| F5         | 5.22E-08 | -0.716409488 | 0.92  | 0.1  | 0.000104492 LEUK |
| CLIC4      | 4.97E-07 | 0.506908687  | 0.92  | 0.1  | 0.000994776 LEUK |
| GALNTL6    | 2.04E-08 | 0.519801879  | 0.916 | 0.05 | 4.08E-05 LEUK    |
| PMEP1      | 2.29E-08 | 0.307038665  | 0.916 | 0.05 | 4.59E-05 LEUK    |
| SLIT3      | 1.16E-06 | -0.30238831  | 0.916 | 0.1  | 0.0023278 LEUK   |
| TARID      | 9.01E-09 | -0.273562707 | 0.916 | 0.05 | 1.80E-05 LEUK    |
| KCNMB2     | 1.07E-06 | -0.258786381 | 0.916 | 0.1  | 0.002143579 LEUK |
| HGF        | 4.40E-07 | -0.553299068 | 0.913 | 0.1  | 0.000880733 LEUK |
| SNTG1      | 7.16E-10 | 0.437331338  | 0.913 | 0    | 1.43E-06 LEUK    |
| CHGB       | 4.88E-08 | -0.375079488 | 0.905 | 0.05 | 9.77E-05 LEUK    |
| ROBO2      | 6.10E-08 | 0.299387178  | 0.905 | 0.05 | 0.000122093 LEUK |
| COL23A1    | 2.32E-06 | -0.295244553 | 0.905 | 0.1  | 0.004643072 LEUK |
| DPP6       | 2.23E-06 | 0.264900458  | 0.902 | 0.1  | 0.004460556 LEUK |
| LDB3       | 2.02E-06 | -0.477873621 | 0.898 | 0.1  | 0.00404627 LEUK  |
| C1orf21    | 3.55E-06 | -0.368508417 | 0.898 | 0.1  | 0.007093366 LEUK |
| FBN2       | 6.29E-07 | -0.258560816 | 0.895 | 0.1  | 0.001258364 LEUK |
| AC068775.1 | 1.67E-07 | -0.766494341 | 0.891 | 0.1  | 0.0003339 LEUK   |
| TRGC1      | 8.41E-06 | -0.381874934 | 0.891 | 0.15 | 0.016822361 LEUK |
| TMEM178B   | 7.90E-06 | -0.428622044 | 0.887 | 0.1  | 0.01579289 LEUK  |
| PTCHD1-AS  | 1.02E-08 | 0.921869918  | 0.884 | 0    | 2.03E-05 LEUK    |
| MTHFD2L    | 6.36E-06 | 0.34428391   | 0.884 | 0.1  | 0.012715319 LEUK |
| ADAM12     | 2.28E-08 | 0.355046396  | 0.88  | 0.05 | 4.57E-05 LEUK    |
| RAPGEF4    | 1.20E-05 | -0.297379695 | 0.88  | 0.1  | 0.02391419 LEUK  |
| NPHS1      | 3.63E-07 | -0.680550885 | 0.876 | 0.1  | 0.000726459 LEUK |
| SH3RF3     | 5.57E-07 | 0.639542828  | 0.876 | 0.05 | 0.001113214 LEUK |
| NETO2      | 2.55E-07 | -0.270758108 | 0.876 | 0.1  | 0.000509691 LEUK |
| DNASE1L3   | 2.56E-07 | -0.427648809 | 0.873 | 0.1  | 0.00051265 LEUK  |
| GGT4P      | 2.18E-05 | -0.280338917 | 0.869 | 0.1  | 0.043639703 LEUK |
| AC007319.1 | 1.95E-06 | -0.339773537 | 0.862 | 0.05 | 0.003898782 LEUK |
| CYYR1-AS1  | 1.31E-06 | -0.381942621 | 0.847 | 0.05 | 0.002624554 LEUK |
| WT1        | 1.77E-08 | -0.270422904 | 0.847 | 0.05 | 3.55E-05 LEUK    |
| PCDH9      | 6.04E-06 | 0.475853149  | 0.844 | 0.05 | 0.012074329 LEUK |
| KIRREL1    | 6.00E-06 | -0.427589424 | 0.844 | 0.05 | 0.011991351 LEUK |
| AC116362.1 | 6.77E-06 | -0.365626667 | 0.844 | 0.05 | 0.013549471 LEUK |
| GALNT17    | 2.96E-08 | 0.261638967  | 0.836 | 0    | 5.93E-05 LEUK    |
| AREG       | 4.13E-08 | -0.317735315 | 0.833 | 0.05 | 8.26E-05 LEUK    |
| AC016766.1 | 3.76E-09 | 0.261341939  | 0.811 | 0    | 7.51E-06 LEUK    |
| AL110292.1 | 7.50E-06 | 0.261640708  | 0.8   | 0    | 0.01499712 LEUK  |
| MMADHC-DT  | 1.24E-05 | 0.312531328  | 0.793 | 0    | 0.024802999 LEUK |
| GAD1       | 1.56E-06 | -0.385245369 | 0.756 | 0.05 | 0.0031171 LEUK   |
| GPM6A      | 3.93E-06 | 0.733153571  | 0.72  | 0    | 0.007851705 LEUK |
| LINC00924  | 8.72E-06 | -0.339354717 | 0.676 | 0.05 | 0.017440106 LEUK |
| H3-3B      | 2.26E-05 | 0.470650116  | 0.225 | 0.05 | 0.04525292 LEUK  |
| H2AC6      | 2.43E-05 | 0.929194981  | 0.222 | 0.05 | 0.048651192 LEUK |
| SAMD3      | 3.74E-06 | -0.907461554 | 0.222 | 0.15 | 0.007478414 LEUK |
| CDH2       | 1.57E-05 | -0.487702489 | 0.222 | 0.05 | 0.031387471 LEUK |
| KIF26B     | 1.73E-05 | 0.51164364   | 0.218 | 0.05 | 0.034625577 LEUK |
| ROBO1      | 1.59E-05 | 0.605686737  | 0.211 | 0    | 0.03176206 LEUK  |
| AL365295.1 | 9.66E-06 | 0.579971115  | 0.204 | 0    | 0.019313943 LEUK |
| SGO1-AS1   | 6.35E-06 | 0.42926137   | 0.204 | 0.05 | 0.012709907 LEUK |

|            |          |              |       |       |                  |
|------------|----------|--------------|-------|-------|------------------|
| ENG        | 1.24E-05 | 0.26224867   | 0.204 | 0     | 0.024777417 LEUK |
| TRAF1      | 8.51E-06 | 0.579996349  | 0.2   | 0     | 0.017016573 LEUK |
| EPS8       | 1.61E-06 | -0.386660653 | 0.196 | 0.1   | 0.003228919 LEUK |
| FCRL1      | 3.93E-06 | 1.395193648  | 0.189 | 0     | 0.007865505 LEUK |
| FAM102A    | 2.65E-06 | 0.608183916  | 0.185 | 0     | 0.005299543 LEUK |
| ALDH1A2    | 5.57E-07 | -0.624860504 | 0.182 | 0.1   | 0.001113792 LEUK |
| TRPC6      | 2.03E-06 | 0.297010978  | 0.182 | 0     | 0.004057066 LEUK |
| SLC20A1    | 1.18E-07 | -0.749246414 | 0.178 | 0.25  | 0.000236895 LEUK |
| H2AC18     | 7.80E-07 | 0.738028822  | 0.178 | 0.1   | 0.001559017 LEUK |
| EIF2AK3    | 1.18E-06 | 0.653106503  | 0.175 | 0     | 0.002357506 LEUK |
| PXYLP1     | 8.95E-07 | 0.259237984  | 0.171 | 0     | 0.001789444 LEUK |
| COL19A1    | 5.88E-07 | 0.689996327  | 0.164 | 0     | 0.001176302 LEUK |
| PTP4A2     | 3.85E-07 | 0.318561763  | 0.16  | 0     | 0.000769279 LEUK |
| ANXA1      | 6.40E-07 | -1.292376002 | 0.156 | 0.1   | 0.001280608 LEUK |
| AC244205.1 | 1.20E-07 | 1.35369547   | 0.145 | 0     | 0.000239814 LEUK |
| ST3GAL6    | 8.01E-08 | 0.517455076  | 0.142 | 0.05  | 0.000160262 LEUK |
| FCRL5      | 8.88E-08 | 0.988022446  | 0.138 | 0     | 0.000177646 LEUK |
| SQSTM1     | 1.59E-08 | -0.352133729 | 0.135 | 0.1   | 3.17E-05 LEUK    |
| ATP6V0D2   | 4.85E-08 | 0.318373914  | 0.135 | 0     | 9.71E-05 LEUK    |
| KCNAB1     | 4.85E-08 | 0.294314036  | 0.135 | 0     | 9.71E-05 LEUK    |
| OLR1       | 2.85E-07 | 0.252338343  | 0.135 | 0     | 0.000569742 LEUK |
| KCNQ3      | 2.39E-08 | 0.612781868  | 0.131 | 0.05  | 4.77E-05 LEUK    |
| LRRC4C     | 2.04E-08 | -0.414982883 | 0.131 | 0.05  | 4.08E-05 LEUK    |
| SOX2-OT    | 9.85E-09 | -0.472572427 | 0.127 | 0.1   | 1.97E-05 LEUK    |
| ID2        | 2.62E-08 | 0.3006029    | 0.127 | 0     | 5.24E-05 LEUK    |
| LINC01788  | 1.14E-08 | -0.397653745 | 0.124 | 0.05  | 2.27E-05 LEUK    |
| POU2AF1    | 2.23E-08 | 0.892299085  | 0.12  | 0     | 4.47E-05 LEUK    |
| NEDD4      | 1.63E-08 | 0.324740053  | 0.12  | 0     | 3.27E-05 LEUK    |
| KCNIP1     | 1.40E-08 | 0.273726081  | 0.12  | 0     | 2.79E-05 LEUK    |
| DISC1FP1   | 7.36E-09 | 0.631911975  | 0.113 | 0     | 1.47E-05 LEUK    |
| PWRN1      | 7.36E-09 | 0.371583596  | 0.113 | 0     | 1.47E-05 LEUK    |
| SLC7A7     | 7.36E-09 | 0.364476538  | 0.113 | 0     | 1.47E-05 LEUK    |
| MEIS2      | 7.36E-09 | 0.362679999  | 0.113 | 0     | 1.47E-05 LEUK    |
| SMS        | 4.83E-09 | -0.270771804 | 0.113 | 0.05  | 9.66E-06 LEUK    |
| WNT5B      | 5.32E-09 | 0.571003502  | 0.109 | 0     | 1.06E-05 LEUK    |
| CACNA1C    | 2.78E-09 | -0.273069821 | 0.105 | 0.05  | 5.56E-06 LEUK    |
| LINC00540  | 2.76E-09 | 0.527692159  | 0.102 | 0     | 5.52E-06 LEUK    |
| ANXA2      | 1.18E-09 | -0.368725631 | 0.102 | 0.1   | 2.35E-06 LEUK    |
| MT2A       | 9.95E-17 | 0.390336514  | 0.998 | 0.396 | 1.99E-13 ENDO    |
| CYP4Z2P    | 8.66E-91 | -0.304691053 | 0.993 | 0.116 | 1.73E-87 ENDO    |
| FTCD       | 3.90E-83 | -0.652747036 | 0.991 | 0.132 | 7.79E-80 ENDO    |
| SLC16A12   | 8.36E-70 | -0.452331841 | 0.991 | 0.164 | 1.67E-66 ENDO    |
| RNF212B    | 2.37E-79 | -0.299523204 | 0.964 | 0.116 | 4.75E-76 ENDO    |
| ERRFI1     | 4.24E-38 | -0.275757152 | 0.957 | 0.237 | 8.49E-35 ENDO    |
| BMPR1B     | 1.07E-44 | -0.281822382 | 0.944 | 0.201 | 2.14E-41 ENDO    |
| MIOX       | 1.52E-72 | -0.281835155 | 0.94  | 0.111 | 3.04E-69 ENDO    |
| CXXC4-AS1  | 1.06E-62 | -0.269996447 | 0.94  | 0.14  | 2.12E-59 ENDO    |
| GRIP1      | 9.58E-28 | -0.568037858 | 0.933 | 0.261 | 1.92E-24 ENDO    |
| ACSM2A     | 5.68E-37 | -0.490102699 | 0.928 | 0.216 | 1.14E-33 ENDO    |
| DDIT4      | 8.46E-29 | -0.256518768 | 0.926 | 0.251 | 1.69E-25 ENDO    |
| RIPOR2     | 3.90E-14 | -0.270930642 | 0.915 | 0.338 | 7.79E-11 ENDO    |
| SLC26A7    | 7.12E-21 | -0.541556321 | 0.911 | 0.272 | 1.42E-17 ENDO    |
| MT1M       | 1.36E-52 | -0.309582872 | 0.904 | 0.145 | 2.73E-49 ENDO    |
| SLIT2      | 1.14E-22 | -0.277824465 | 0.902 | 0.264 | 2.29E-19 ENDO    |
| UGT1A8     | 1.34E-36 | -0.267723186 | 0.888 | 0.177 | 2.67E-33 ENDO    |
| CYP3A5     | 1.86E-30 | -0.556042445 | 0.886 | 0.201 | 3.72E-27 ENDO    |
| KCNMB4     | 1.39E-05 | -0.315378368 | 0.87  | 0.396 | 0.027757039 ENDO |
| SORCS1     | 3.72E-37 | -0.415866558 | 0.868 | 0.153 | 7.45E-34 ENDO    |
| GPAT3      | 2.26E-31 | -0.386269041 | 0.861 | 0.172 | 4.51E-28 ENDO    |
| KCNJ15     | 1.16E-30 | -0.375422022 | 0.861 | 0.174 | 2.31E-27 ENDO    |

|            |          |              |       |       |                  |
|------------|----------|--------------|-------|-------|------------------|
| SGK1       | 4.44E-08 | 0.389230273  | 0.857 | 0.414 | 8.87E-05 ENDO    |
| RALYL      | 3.72E-11 | -0.571634943 | 0.853 | 0.288 | 7.43E-08 ENDO    |
| ESM1       | 3.51E-27 | -0.574533402 | 0.842 | 0.177 | 7.02E-24 ENDO    |
| CPM        | 6.72E-23 | -0.451252592 | 0.839 | 0.198 | 1.34E-19 ENDO    |
| ACSM2B     | 2.64E-24 | -0.467272413 | 0.835 | 0.182 | 5.28E-21 ENDO    |
| PDE1C      | 1.64E-23 | -0.465474445 | 0.824 | 0.174 | 3.29E-20 ENDO    |
| GNAI1      | 7.24E-23 | -0.280615829 | 0.821 | 0.174 | 1.45E-19 ENDO    |
| SLC22A6    | 1.06E-40 | -0.264171217 | 0.821 | 0.087 | 2.12E-37 ENDO    |
| SLC16A9    | 3.89E-27 | -0.251673427 | 0.812 | 0.14  | 7.77E-24 ENDO    |
| LINC00671  | 5.69E-41 | -0.287336952 | 0.808 | 0.071 | 1.14E-37 ENDO    |
| PLOD2      | 1.58E-19 | 0.280303412  | 0.806 | 0.193 | 3.17E-16 ENDO    |
| COL4A1     | 1.03E-08 | 0.591733831  | 0.804 | 0.375 | 2.06E-05 ENDO    |
| DEPTOR     | 8.80E-13 | -0.319091212 | 0.797 | 0.219 | 1.76E-09 ENDO    |
| TOX3       | 3.75E-17 | -0.41070907  | 0.792 | 0.177 | 7.50E-14 ENDO    |
| AC005699.1 | 1.15E-43 | 0.407321917  | 0.792 | 0.045 | 2.30E-40 ENDO    |
| ID2        | 3.36E-15 | -0.371491837 | 0.792 | 0.19  | 6.72E-12 ENDO    |
| DCLK2      | 2.84E-08 | 0.315137017  | 0.792 | 0.311 | 5.68E-05 ENDO    |
| HRH1       | 2.74E-15 | -0.292046656 | 0.792 | 0.198 | 5.47E-12 ENDO    |
| PCDH15     | 3.97E-18 | 0.303659923  | 0.788 | 0.174 | 7.93E-15 ENDO    |
| RHOBTB3    | 2.48E-11 | -0.37119438  | 0.774 | 0.203 | 4.97E-08 ENDO    |
| SPRY1      | 2.13E-20 | 0.359524763  | 0.77  | 0.15  | 4.25E-17 ENDO    |
| CACNA2D3   | 3.72E-18 | -0.319340127 | 0.77  | 0.145 | 7.43E-15 ENDO    |
| AC087633.2 | 3.92E-12 | 0.297099352  | 0.763 | 0.206 | 7.85E-09 ENDO    |
| AL390334.1 | 2.22E-12 | -0.263256132 | 0.752 | 0.169 | 4.43E-09 ENDO    |
| PRODH2     | 4.60E-27 | -0.251577403 | 0.752 | 0.074 | 9.21E-24 ENDO    |
| CA4        | 5.92E-17 | -0.485885311 | 0.741 | 0.153 | 1.18E-13 ENDO    |
| MAP2       | 1.21E-05 | 0.475824981  | 0.734 | 0.261 | 0.024268164 ENDO |
| AFF3       | 4.25E-11 | 0.351913787  | 0.697 | 0.124 | 8.50E-08 ENDO    |
| CNTN1      | 1.59E-22 | 0.350398229  | 0.694 | 0.034 | 3.19E-19 ENDO    |
| PAH        | 9.62E-13 | -0.252915757 | 0.69  | 0.084 | 1.92E-09 ENDO    |
| NFE2L2     | 1.33E-05 | -0.332851659 | 0.676 | 0.544 | 0.026699439 ENDO |
| EYA4       | 2.25E-23 | -0.318825842 | 0.667 | 0.077 | 4.49E-20 ENDO    |
| ABCA10     | 2.85E-06 | -0.303224401 | 0.661 | 0.113 | 0.005691991 ENDO |
| SLC9C1     | 7.89E-07 | 0.268329763  | 0.658 | 0.108 | 0.001578991 ENDO |
| PCED1B     | 2.39E-05 | -0.376864851 | 0.652 | 0.533 | 0.047873381 ENDO |
| TENM2      | 2.37E-09 | -0.406531992 | 0.649 | 0.084 | 4.75E-06 ENDO    |
| TMEM101    | 2.59E-06 | -0.265534218 | 0.647 | 0.092 | 0.005170148 ENDO |
| SCNN1G     | 3.28E-22 | -0.264974836 | 0.645 | 0.071 | 6.55E-19 ENDO    |
| CD200      | 5.32E-06 | 0.349779774  | 0.636 | 0.092 | 0.010634707 ENDO |
| TRPM7      | 1.16E-07 | -0.416838759 | 0.601 | 0.472 | 0.000232978 ENDO |
| NRP2       | 1.80E-19 | 0.339468288  | 0.601 | 0.1   | 3.59E-16 ENDO    |
| EFNB2      | 1.18E-07 | -0.281561106 | 0.571 | 0.456 | 0.000235998 ENDO |
| NEDD4      | 5.42E-09 | -0.29048972  | 0.547 | 0.433 | 1.08E-05 ENDO    |
| IFI44L     | 8.28E-08 | -0.351041697 | 0.531 | 0.343 | 0.000165662 ENDO |
| NDRG1      | 3.10E-06 | 0.355532636  | 0.498 | 0.277 | 0.006199686 ENDO |
| ITGA8      | 1.34E-10 | -0.425954806 | 0.495 | 0.335 | 2.68E-07 ENDO    |
| NOX4       | 4.65E-06 | -0.34922373  | 0.478 | 0.153 | 0.009298318 ENDO |
| TCIM       | 1.70E-06 | 0.445339145  | 0.473 | 0.203 | 0.003409113 ENDO |
| SLC12A3    | 8.65E-06 | -0.584310017 | 0.469 | 0.121 | 0.0172958 ENDO   |
| FGF13      | 2.90E-08 | -0.702900294 | 0.466 | 0.172 | 5.80E-05 ENDO    |
| HDAC9      | 1.56E-05 | 0.576973115  | 0.449 | 0.095 | 0.031284428 ENDO |
| KLHL13     | 1.19E-10 | -0.310616707 | 0.44  | 0.158 | 2.38E-07 ENDO    |
| VEGFC      | 8.50E-10 | 0.439876055  | 0.438 | 0.208 | 1.70E-06 ENDO    |
| SULF1      | 2.63E-12 | -0.450239852 | 0.435 | 0.203 | 5.25E-09 ENDO    |
| CACNA1D    | 1.75E-08 | -0.250814156 | 0.435 | 0.1   | 3.51E-05 ENDO    |
| GASK1B     | 1.63E-07 | 0.311604106  | 0.431 | 0.084 | 0.000325862 ENDO |
| FOS        | 8.52E-08 | 0.366818538  | 0.428 | 0.09  | 0.000170485 ENDO |
| PCDH17     | 3.87E-12 | 0.273777322  | 0.42  | 0.179 | 7.74E-09 ENDO    |
| NR4A1      | 1.37E-11 | 0.304858484  | 0.418 | 0.19  | 2.74E-08 ENDO    |
| LINC01098  | 1.84E-12 | -0.291844897 | 0.415 | 0.124 | 3.68E-09 ENDO    |

|            |           |              |       |       |                    |
|------------|-----------|--------------|-------|-------|--------------------|
| FAM110B    | 4.12E-14  | -0.275092683 | 0.395 | 0.103 | 8.24E-11 ENDO      |
| KL         | 3.15E-15  | -0.259340417 | 0.395 | 0.124 | 6.31E-12 ENDO      |
| C1orf112   | 7.01E-13  | 0.297972766  | 0.393 | 0.087 | 1.40E-09 ENDO      |
| ENPP2      | 2.44E-13  | 0.680088058  | 0.384 | 0.077 | 4.87E-10 ENDO      |
| ADAMTSL1   | 3.40E-16  | 0.352528349  | 0.384 | 0.158 | 6.81E-13 ENDO      |
| DUSP5      | 1.49E-15  | 0.689740817  | 0.38  | 0.148 | 2.99E-12 ENDO      |
| LINC02147  | 2.73E-11  | 0.423886759  | 0.38  | 0.053 | 5.46E-08 ENDO      |
| NFATC2     | 7.43E-21  | 0.435949631  | 0.351 | 0.113 | 1.49E-17 ENDO      |
| DOCK5      | 3.47E-16  | 0.357521622  | 0.346 | 0.092 | 6.93E-13 ENDO      |
| CCDC3      | 1.87E-18  | 0.347993279  | 0.346 | 0.053 | 3.73E-15 ENDO      |
| KLHL4      | 7.83E-18  | 0.251381224  | 0.342 | 0.026 | 1.57E-14 ENDO      |
| LAMA4      | 1.26E-24  | 0.372966344  | 0.332 | 0.103 | 2.53E-21 ENDO      |
| DOCK8      | 1.40E-23  | 0.322314894  | 0.328 | 0.055 | 2.81E-20 ENDO      |
| TM4SF1     | 2.62E-23  | 0.304597646  | 0.326 | 0.087 | 5.24E-20 ENDO      |
| H2AC18     | 2.90E-21  | 0.355240226  | 0.315 | 0.047 | 5.81E-18 ENDO      |
| ADAMTS1    | 8.72E-27  | 0.512236219  | 0.313 | 0.069 | 1.74E-23 ENDO      |
| KCTD16     | 2.90E-30  | 0.344478762  | 0.295 | 0.034 | 5.79E-27 ENDO      |
| SEMA3A     | 1.43E-38  | 0.251412756  | 0.274 | 0.082 | 2.85E-35 ENDO      |
| ST8SIA6    | 3.89E-37  | 0.291910681  | 0.272 | 0.095 | 7.78E-34 ENDO      |
| CNTN5      | 1.27E-36  | 0.341717413  | 0.259 | 0.05  | 2.54E-33 ENDO      |
| NLGN4Y     | 1.58E-48  | 0.25447135   | 0.237 | 0.111 | 3.16E-45 ENDO      |
| SEMA3D     | 7.50E-18  | 0.295642431  | 0.216 | 0.061 | 1.50E-14 ENDO      |
| VCAM1      | 3.25E-25  | 0.803939373  | 0.208 | 0.04  | 6.50E-22 ENDO      |
| PROX1      | 9.83E-08  | 0.260033637  | 0.196 | 0.018 | 0.00019657 ENDO    |
| FOSB       | 2.77E-35  | 0.28733766   | 0.181 | 0.021 | 5.54E-32 ENDO      |
| CD36       | 1.14E-40  | 0.529426669  | 0.163 | 0.024 | 2.28E-37 ENDO      |
| MSR1       | 3.02E-81  | -0.257981357 | 0.154 | 0.098 | 6.05E-78 ENDO      |
| TMEM178A   | 7.26E-10  | -0.386082228 | 0.993 | 0.508 | 1.45E-06 DCT-CT    |
| HSPA1B     | 1.11E-19  | -0.441802687 | 0.991 | 0.45  | 2.23E-16 DCT-CT    |
| ITGA2      | 1.97E-10  | 0.618371754  | 0.984 | 0.685 | 3.93E-07 DCT-CT    |
| PDE1C      | 4.29E-23  | 0.321864128  | 0.978 | 0.567 | 8.57E-20 DCT-CT    |
| HSPA1A     | 6.44E-80  | -0.341810331 | 0.974 | 0.306 | 1.29E-76 DCT-CT    |
| GABRA2     | 1.15E-50  | -0.296039033 | 0.947 | 0.339 | 2.30E-47 DCT-CT    |
| SLC5A12    | 1.18E-141 | -0.261070148 | 0.927 | 0.185 | 2.36E-138 DCT-CT   |
| TMTC2      | 4.51E-07  | -0.271583431 | 0.925 | 0.83  | 0.000901002 DCT-CT |
| NRG1       | 2.59E-123 | -0.285458912 | 0.921 | 0.21  | 5.17E-120 DCT-CT   |
| ITGAV      | 1.27E-18  | 0.381641883  | 0.92  | 0.571 | 2.54E-15 DCT-CT    |
| SLC12A3    | 4.08E-102 | -0.75898531  | 0.911 | 0.22  | 8.16E-99 DCT-CT    |
| DACH1      | 1.35E-14  | 0.432165467  | 0.906 | 0.66  | 2.70E-11 DCT-CT    |
| EGF        | 1.53E-29  | -0.391954884 | 0.903 | 0.378 | 3.05E-26 DCT-CT    |
| SLC4A4     | 7.34E-23  | -0.329035873 | 0.901 | 0.392 | 1.47E-19 DCT-CT    |
| FNDC3A     | 4.95E-16  | 0.492503641  | 0.9   | 0.712 | 9.90E-13 DCT-CT    |
| FGF13      | 3.50E-30  | 0.319643815  | 0.9   | 0.421 | 6.99E-27 DCT-CT    |
| KLHL13     | 1.58E-13  | 0.32146855   | 0.877 | 0.498 | 3.17E-10 DCT-CT    |
| KCNK13     | 4.45E-19  | -0.304148578 | 0.872 | 0.364 | 8.90E-16 DCT-CT    |
| RTN4       | 2.38E-10  | 0.31137466   | 0.869 | 0.585 | 4.77E-07 DCT-CT    |
| NPSR1-AS1  | 7.87E-41  | -0.25794866  | 0.863 | 0.287 | 1.57E-37 DCT-CT    |
| AC004593.2 | 3.60E-08  | 0.413548767  | 0.862 | 0.56  | 7.21E-05 DCT-CT    |
| VCL        | 5.91E-17  | 0.42349338   | 0.844 | 0.505 | 1.18E-13 DCT-CT    |
| CSGALNACT1 | 1.44E-05  | 0.270366533  | 0.83  | 0.61  | 0.028830278 DCT-CT |
| KIF26B     | 1.80E-05  | -0.267677866 | 0.825 | 0.427 | 0.036037503 DCT-CT |
| STC1       | 7.32E-91  | 0.350347519  | 0.82  | 0.154 | 1.46E-87 DCT-CT    |
| CPM        | 5.09E-56  | 0.293765881  | 0.818 | 0.229 | 1.02E-52 DCT-CT    |
| DEFB1      | 9.16E-08  | 0.278309647  | 0.803 | 0.47  | 0.000183165 DCT-CT |
| ACSM2A     | 4.03E-29  | -0.638585358 | 0.796 | 0.242 | 8.06E-26 DCT-CT    |
| ACTB       | 8.65E-18  | 0.443802259  | 0.795 | 0.413 | 1.73E-14 DCT-CT    |
| GADD45B    | 2.54E-24  | 0.469240704  | 0.789 | 0.331 | 5.09E-21 DCT-CT    |
| SLC44A1    | 6.12E-11  | 0.42019313   | 0.787 | 0.404 | 1.22E-07 DCT-CT    |
| SLC16A9    | 6.94E-57  | -0.253403573 | 0.786 | 0.161 | 1.39E-53 DCT-CT    |
| ACSM2B     | 1.77E-39  | -0.568514137 | 0.78  | 0.194 | 3.54E-36 DCT-CT    |

|            |           |              |       |       |                    |
|------------|-----------|--------------|-------|-------|--------------------|
| MIOX       | 1.10E-69  | -0.59457684  | 0.772 | 0.12  | 2.21E-66 DCT-CT    |
| PRODH2     | 2.59E-71  | -0.352130426 | 0.752 | 0.1   | 5.17E-68 DCT-CT    |
| ITGB6      | 2.98E-14  | 0.668984562  | 0.749 | 0.338 | 5.96E-11 DCT-CT    |
| PWRN1      | 1.39E-07  | -0.369857582 | 0.736 | 0.536 | 0.0002778 DCT-CT   |
| SLC12A1    | 4.57E-47  | -0.322558919 | 0.733 | 0.122 | 9.14E-44 DCT-CT    |
| GNA13      | 8.26E-15  | 0.311344108  | 0.728 | 0.267 | 1.65E-11 DCT-CT    |
| MIR222HG   | 3.96E-18  | 0.595930812  | 0.72  | 0.253 | 7.92E-15 DCT-CT    |
| RUNX1      | 5.09E-06  | 0.278368441  | 0.713 | 0.359 | 0.010180164 DCT-CT |
| GPR137B    | 3.77E-23  | 0.27054956   | 0.713 | 0.181 | 7.54E-20 DCT-CT    |
| SEMA6D     | 9.04E-14  | -0.330377695 | 0.708 | 0.198 | 1.81E-10 DCT-CT    |
| BTG2       | 3.34E-06  | 0.310501986  | 0.708 | 0.338 | 0.006671068 DCT-CT |
| LGALS3     | 1.88E-16  | 0.375132388  | 0.691 | 0.203 | 3.75E-13 DCT-CT    |
| MME        | 4.18E-15  | -0.312174026 | 0.691 | 0.167 | 8.35E-12 DCT-CT    |
| TUFT1      | 1.15E-10  | 0.317743353  | 0.69  | 0.237 | 2.30E-07 DCT-CT    |
| GDF15      | 1.81E-05  | 0.582379606  | 0.687 | 0.341 | 0.036120523 DCT-CT |
| THBS1      | 1.58E-29  | 0.269082739  | 0.685 | 0.116 | 3.17E-26 DCT-CT    |
| FTCD       | 8.14E-15  | -0.434816436 | 0.668 | 0.141 | 1.63E-11 DCT-CT    |
| MET        | 1.72E-06  | 0.510794203  | 0.667 | 0.247 | 0.003437152 DCT-CT |
| ERRF1I     | 1.27E-06  | 0.380164203  | 0.664 | 0.213 | 0.002545528 DCT-CT |
| SLC6A13    | 2.70E-10  | -0.273873571 | 0.661 | 0.152 | 5.40E-07 DCT-CT    |
| ARG2       | 3.96E-07  | -0.273443871 | 0.661 | 0.415 | 0.000791681 DCT-CT |
| RAB11FIP1  | 1.99E-05  | 0.361261931  | 0.655 | 0.23  | 0.039739032 DCT-CT |
| SGK1       | 2.13E-06  | 0.412534408  | 0.635 | 0.192 | 0.004266324 DCT-CT |
| COL4A1     | 5.15E-07  | 0.323589893  | 0.569 | 0.334 | 0.001029106 DCT-CT |
| EEPD1      | 7.38E-06  | 0.380875883  | 0.54  | 0.248 | 0.014768854 DCT-CT |
| SGCD       | 6.20E-08  | -0.271520768 | 0.53  | 0.192 | 0.000124066 DCT-CT |
| PLCB1      | 2.49E-08  | -0.270427915 | 0.518 | 0.163 | 4.98E-05 DCT-CT    |
| LINC01876  | 3.22E-08  | -0.259427566 | 0.51  | 0.148 | 6.44E-05 DCT-CT    |
| NR4A1      | 1.06E-09  | 0.308774276  | 0.507 | 0.225 | 2.12E-06 DCT-CT    |
| S100A6     | 5.83E-08  | 0.401743887  | 0.497 | 0.173 | 0.000116664 DCT-CT |
| MAP3K14    | 6.50E-11  | 0.280705415  | 0.489 | 0.181 | 1.30E-07 DCT-CT    |
| ATP2B4     | 1.62E-19  | 0.258672665  | 0.48  | 0.23  | 3.23E-16 DCT-CT    |
| UPP1       | 2.90E-11  | 0.551579721  | 0.467 | 0.112 | 5.81E-08 DCT-CT    |
| IER3       | 1.56E-17  | 0.389286459  | 0.456 | 0.159 | 3.13E-14 DCT-CT    |
| FOS        | 6.77E-30  | 0.269919424  | 0.42  | 0.119 | 1.35E-26 DCT-CT    |
| SLC2A1     | 9.12E-19  | 0.432913093  | 0.415 | 0.073 | 1.82E-15 DCT-CT    |
| EGR1       | 1.88E-28  | 0.322631402  | 0.415 | 0.093 | 3.76E-25 DCT-CT    |
| MIDN       | 2.81E-30  | 0.408326694  | 0.411 | 0.099 | 5.63E-27 DCT-CT    |
| SPP1       | 3.27E-36  | 0.34971578   | 0.393 | 0.084 | 6.54E-33 DCT-CT    |
| FAM155A    | 3.54E-59  | 0.444481989  | 0.356 | 0.102 | 7.07E-56 DCT-CT    |
| LONRF3     | 1.30E-12  | 0.261067902  | 0.301 | 0.023 | 2.59E-09 DCT-CT    |
| TRPV5      | 3.71E-105 | 0.269411837  | 0.295 | 0.102 | 7.41E-102 DCT-CT   |
| LINC00113  | 5.96E-63  | -0.275122136 | 1     | 0.325 | 1.19E-59 DCT       |
| HFM1       | 2.44E-06  | 0.35577754   | 0.998 | 0.993 | 0.004872847 DCT    |
| AC093895.1 | 2.12E-95  | -0.557053123 | 0.994 | 0.26  | 4.25E-92 DCT       |
| KCNIP4     | 3.25E-13  | 0.479173052  | 0.988 | 0.847 | 6.50E-10 DCT       |
| PDE10A     | 4.12E-07  | 0.375285581  | 0.972 | 0.819 | 0.000823611 DCT    |
| LRRK2      | 8.78E-15  | -0.376881927 | 0.952 | 0.445 | 1.76E-11 DCT       |
| PSG9       | 2.07E-119 | -0.300175777 | 0.951 | 0.199 | 4.14E-116 DCT      |
| SLC8A1     | 5.51E-10  | 0.670214089  | 0.948 | 0.599 | 1.10E-06 DCT       |
| AC092078.2 | 1.03E-10  | -0.53923474  | 0.939 | 0.453 | 2.07E-07 DCT       |
| FKBP5      | 1.55E-88  | -0.260743885 | 0.938 | 0.231 | 3.10E-85 DCT       |
| PTCHD1-AS  | 7.38E-24  | -0.387451903 | 0.936 | 0.406 | 1.48E-20 DCT       |
| EFEMP1     | 7.59E-40  | -0.256782686 | 0.909 | 0.303 | 1.52E-36 DCT       |
| MEPE       | 3.12E-43  | -0.370321298 | 0.88  | 0.263 | 6.23E-40 DCT       |
| SLC5A12    | 4.62E-87  | -0.379224167 | 0.875 | 0.175 | 9.24E-84 DCT       |
| DNER       | 2.16E-16  | 0.482664323  | 0.868 | 0.473 | 4.32E-13 DCT       |
| ACSM2A     | 1.36E-47  | -0.593186093 | 0.849 | 0.227 | 2.72E-44 DCT       |
| KCNH7      | 3.52E-57  | -0.319097216 | 0.848 | 0.213 | 7.03E-54 DCT       |
| PRODH2     | 3.54E-141 | -0.335954605 | 0.844 | 0.08  | 7.07E-138 DCT      |

|            |          |              |       |       |                    |
|------------|----------|--------------|-------|-------|--------------------|
| FTCD       | 6.79E-91 | -0.411408369 | 0.822 | 0.118 | 1.36E-87 DCT       |
| ACSM2B     | 1.54E-38 | -0.647870757 | 0.802 | 0.199 | 3.09E-35 DCT       |
| ATP1B3     | 2.91E-06 | 0.291200248  | 0.795 | 0.429 | 0.005821843 DCT    |
| SLC8A1-AS1 | 3.27E-07 | 0.734700295  | 0.768 | 0.387 | 0.000653437 DCT    |
| MIOX       | 3.37E-42 | -0.398310276 | 0.737 | 0.116 | 6.74E-39 DCT       |
| FAM155A    | 2.90E-10 | 0.316266915  | 0.725 | 0.278 | 5.79E-07 DCT       |
| CUBN       | 3.27E-06 | -0.419775873 | 0.594 | 0.316 | 0.006539359 DCT    |
| LINC01098  | 1.56E-20 | 0.329520369  | 0.443 | 0.167 | 3.11E-17 DCT       |
| CASC22     | 4.79E-24 | 0.28409816   | 0.415 | 0.091 | 9.58E-21 DCT       |
| KCNIP1     | 1.53E-19 | -0.283871134 | 0.99  | 0.335 | 3.06E-16 CD-PC     |
| AC004784.1 | 2.75E-10 | -0.59051504  | 0.981 | 0.397 | 5.49E-07 CD-PC     |
| PSG4       | 3.05E-13 | -0.505330663 | 0.973 | 0.371 | 6.10E-10 CD-PC     |
| PALM2AKAP2 | 1.61E-10 | 0.263654075  | 0.951 | 0.468 | 3.21E-07 CD-PC     |
| SLC39A8    | 2.18E-10 | -0.351809161 | 0.948 | 0.365 | 4.37E-07 CD-PC     |
| MIR222HG   | 5.43E-33 | -0.49154316  | 0.942 | 0.216 | 1.09E-29 CD-PC     |
| MIOX       | 8.43E-62 | -0.250388262 | 0.926 | 0.097 | 1.69E-58 CD-PC     |
| SYN3       | 2.70E-13 | -0.434200199 | 0.918 | 0.319 | 5.40E-10 CD-PC     |
| TUFT1      | 5.04E-12 | -0.31575626  | 0.911 | 0.335 | 1.01E-08 CD-PC     |
| DEFB1      | 8.54E-06 | -0.376237937 | 0.878 | 0.374 | 0.017078192 CD-PC  |
| ASS1       | 1.45E-22 | -0.316284753 | 0.864 | 0.194 | 2.91E-19 CD-PC     |
| DDIT3      | 1.78E-07 | -0.381069893 | 0.808 | 0.271 | 0.000355515 CD-PC  |
| PSG5       | 1.28E-12 | -0.306027949 | 0.775 | 0.294 | 2.57E-09 CD-PC     |
| INSIG1     | 1.77E-19 | -0.310376168 | 0.765 | 0.129 | 3.54E-16 CD-PC     |
| ALAS1      | 2.04E-14 | -0.361653135 | 0.755 | 0.139 | 4.08E-11 CD-PC     |
| KLF10      | 4.50E-15 | -0.282963856 | 0.75  | 0.171 | 9.00E-12 CD-PC     |
| SLC14A2    | 1.85E-10 | -0.29841899  | 0.742 | 0.161 | 3.71E-07 CD-PC     |
| AC117386.2 | 1.69E-14 | 0.264509456  | 0.713 | 0.09  | 3.38E-11 CD-PC     |
| SLC12A1    | 4.15E-08 | 0.261078843  | 0.685 | 0.129 | 8.31E-05 CD-PC     |
| H2AC18     | 8.94E-06 | 0.626521669  | 0.635 | 0.1   | 0.017880811 CD-PC  |
| S100A2     | 4.80E-06 | -0.443708417 | 0.635 | 0.081 | 0.009594651 CD-PC  |
| AQP3       | 1.54E-05 | -0.463307521 | 0.633 | 0.516 | 0.030831904 CD-PC  |
| NR4A1      | 2.57E-06 | -0.625811346 | 0.608 | 0.477 | 0.005133609 CD-PC  |
| COL4A1     | 3.50E-07 | -0.416386392 | 0.538 | 0.442 | 0.000699034 CD-PC  |
| KRT19      | 7.34E-06 | -0.305576829 | 0.526 | 0.29  | 0.014679861 CD-PC  |
| ATF3       | 2.09E-08 | -0.493749463 | 0.513 | 0.326 | 4.18E-05 CD-PC     |
| MIDN       | 3.00E-07 | -0.348261974 | 0.482 | 0.213 | 0.000599617 CD-PC  |
| ROBO2      | 1.19E-05 | 0.470198369  | 0.447 | 0.132 | 0.023780362 CD-PC  |
| FAM155A    | 7.43E-06 | 0.546391379  | 0.439 | 0.132 | 0.01486503 CD-PC   |
| SAMD4A     | 5.76E-19 | -0.396807555 | 0.435 | 0.371 | 1.15E-15 CD-PC     |
| TMTC1      | 7.02E-09 | -0.295092336 | 0.429 | 0.116 | 1.40E-05 CD-PC     |
| AC020916.1 | 2.66E-13 | -0.297816616 | 0.425 | 0.2   | 5.33E-10 CD-PC     |
| SLC7A8     | 7.20E-10 | 0.299678961  | 0.419 | 0.181 | 1.44E-06 CD-PC     |
| S100A6     | 1.24E-18 | -0.852348067 | 0.414 | 0.261 | 2.49E-15 CD-PC     |
| EDN2       | 1.17E-05 | -0.376973774 | 0.398 | 0.052 | 0.023432588 CD-PC  |
| ID3        | 7.52E-12 | 0.272481557  | 0.375 | 0.052 | 1.50E-08 CD-PC     |
| LRRTM4     | 1.24E-13 | 0.320182559  | 0.373 | 0.094 | 2.48E-10 CD-PC     |
| ELF3       | 1.61E-26 | -0.531546913 | 0.34  | 0.242 | 3.22E-23 CD-PC     |
| IER3       | 1.88E-26 | -0.301498924 | 0.334 | 0.223 | 3.75E-23 CD-PC     |
| AC015522.1 | 8.89E-34 | 0.651274636  | 0.256 | 0.026 | 1.78E-30 CD-PC     |
| TMEM101    | 8.44E-14 | -0.608053854 | 1     | 0.333 | 1.69E-10 CD-ICB    |
| SRGAP1     | 1.27E-06 | -0.264920597 | 1     | 0.411 | 0.002545802 CD-ICB |
| UNC5C      | 2.35E-06 | -0.256811467 | 1     | 0.42  | 0.004702473 CD-ICB |
| KCNQ3      | 7.91E-15 | -0.604218671 | 0.996 | 0.333 | 1.58E-11 CD-ICB    |
| KCNH5      | 6.32E-25 | -0.332846988 | 0.996 | 0.251 | 1.26E-21 CD-ICB    |
| ERRFI1     | 4.27E-07 | -0.273131643 | 0.996 | 0.446 | 0.000853572 CD-ICB |
| EGF        | 1.99E-44 | -0.491326452 | 0.993 | 0.156 | 3.98E-41 CD-ICB    |
| SORCS1     | 6.46E-36 | -0.267902885 | 0.961 | 0.165 | 1.29E-32 CD-ICB    |
| BRINP3     | 5.32E-21 | -0.251469507 | 0.958 | 0.242 | 1.06E-17 CD-ICB    |
| ATP1B3     | 1.06E-24 | 0.348229978  | 0.951 | 0.247 | 2.13E-21 CD-ICB    |
| SLC12A1    | 3.08E-36 | -0.282168853 | 0.937 | 0.139 | 6.16E-33 CD-ICB    |



|             |           |              |       |       |                    |
|-------------|-----------|--------------|-------|-------|--------------------|
| HPSE        | 4.36E-19  | -0.416988039 | 0.905 | 0.212 | 8.73E-16 CD-ICB    |
| GPC3        | 9.69E-18  | -0.364747564 | 0.898 | 0.216 | 1.94E-14 CD-ICB    |
| ITPRID1     | 2.01E-08  | 0.395991605  | 0.891 | 0.377 | 4.02E-05 CD-ICB    |
| NLGN1       | 5.94E-06  | 0.318899259  | 0.88  | 0.403 | 0.011878488 CD-ICB |
| C5orf17     | 1.32E-13  | -0.314644539 | 0.866 | 0.221 | 2.64E-10 CD-ICB    |
| OSBPL6      | 5.51E-11  | -0.500588745 | 0.838 | 0.216 | 1.10E-07 CD-ICB    |
| ADARB2      | 5.06E-06  | 0.413703622  | 0.838 | 0.333 | 0.01012184 CD-ICB  |
| ZNF385B     | 1.22E-13  | 0.461159141  | 0.831 | 0.199 | 2.44E-10 CD-ICB    |
| UGCG        | 3.52E-07  | 0.27309882   | 0.831 | 0.32  | 0.000703833 CD-ICB |
| ZFP36       | 8.40E-14  | 0.307810975  | 0.796 | 0.16  | 1.68E-10 CD-ICB    |
| THBS1       | 9.34E-10  | 0.26134168   | 0.704 | 0.082 | 1.87E-06 CD-ICB    |
| ELOVL5      | 9.54E-07  | -0.263187628 | 0.486 | 0.333 | 0.001908785 CD-ICB |
| GRIN2A      | 1.92E-05  | 0.303780549  | 0.454 | 0.199 | 0.038363172 CD-ICB |
| EIF2AK3     | 5.64E-07  | 0.446435216  | 0.423 | 0.238 | 0.00112896 CD-ICB  |
| ERO1B       | 7.97E-09  | 0.32157913   | 0.412 | 0.195 | 1.59E-05 CD-ICB    |
| S100A6      | 1.07E-09  | 0.313585607  | 0.408 | 0.29  | 2.15E-06 CD-ICB    |
| FREM2       | 2.81E-10  | -0.289548202 | 0.384 | 0.113 | 5.62E-07 CD-ICB    |
| MIR4435-2HG | 2.81E-11  | 0.374772344  | 0.377 | 0.216 | 5.61E-08 CD-ICB    |
| AC013652.1  | 2.64E-10  | 0.40347904   | 0.37  | 0.113 | 5.28E-07 CD-ICB    |
| ELF3        | 1.44E-11  | 0.402134789  | 0.37  | 0.177 | 2.87E-08 CD-ICB    |
| EGR1        | 9.30E-11  | 0.389565967  | 0.37  | 0.139 | 1.86E-07 CD-ICB    |
| H3-3B       | 7.70E-12  | 0.26674166   | 0.363 | 0.143 | 1.54E-08 CD-ICB    |
| AC074286.1  | 4.65E-12  | 0.334666467  | 0.359 | 0.139 | 9.31E-09 CD-ICB    |
| S100A2      | 3.45E-12  | 0.659153996  | 0.345 | 0.078 | 6.90E-09 CD-ICB    |
| ZDHHC14     | 1.26E-17  | -0.26107876  | 0.331 | 0.16  | 2.51E-14 CD-ICB    |
| NRG1        | 2.45E-22  | -0.294728448 | 0.285 | 0.1   | 4.90E-19 CD-ICB    |
| SOX2-OT     | 8.07E-26  | -0.291520611 | 0.278 | 0.221 | 1.61E-22 CD-ICB    |
| CYTOR       | 9.04E-24  | 0.475092308  | 0.261 | 0.074 | 1.81E-20 CD-ICB    |
| HSPA5       | 3.36E-30  | 0.383010655  | 0.225 | 0.091 | 6.72E-27 CD-ICB    |
| SOX4        | 6.89E-33  | 0.250968358  | 0.211 | 0.03  | 1.38E-29 CD-ICB    |
| AL031599.1  | 3.84E-106 | -0.401439452 | 1     | 0.184 | 7.67E-103 CD-ICA   |
| LINC01187   | 1.45E-07  | 0.271972288  | 1     | 0.917 | 0.000289286 CD-ICA |
| PSD3        | 3.68E-10  | 0.403134096  | 0.998 | 0.902 | 7.36E-07 CD-ICA    |
| ADAMTSL1    | 4.59E-06  | 0.36489492   | 0.998 | 0.854 | 0.009174287 CD-ICA |
| NPSR1-AS1   | 1.48E-38  | -0.263817437 | 0.998 | 0.33  | 2.96E-35 CD-ICA    |
| ABCC4       | 1.78E-06  | 0.256865845  | 0.998 | 0.928 | 0.003550635 CD-ICA |
| ITPRID1     | 3.18E-20  | 0.330937959  | 0.994 | 0.497 | 6.35E-17 CD-ICA    |
| ACSM2B      | 2.25E-77  | -0.412513468 | 0.993 | 0.229 | 4.50E-74 CD-ICA    |
| LEF1        | 4.54E-13  | 0.489972758  | 0.991 | 0.718 | 9.09E-10 CD-ICA    |
| GRIP1       | 1.99E-08  | 0.357211614  | 0.991 | 0.854 | 3.99E-05 CD-ICA    |
| GULP1       | 8.37E-08  | 0.337949476  | 0.989 | 0.746 | 0.00016733 CD-ICA  |
| MIR2052HG   | 6.55E-150 | -0.283810349 | 0.989 | 0.117 | 1.31E-146 CD-ICA   |
| KCNJ15      | 3.14E-40  | -0.309447133 | 0.981 | 0.311 | 6.28E-37 CD-ICA    |
| PRODH2      | 3.98E-149 | -0.25402222  | 0.978 | 0.109 | 7.95E-146 CD-ICA   |
| LINC02343   | 1.93E-07  | 0.381854226  | 0.976 | 0.663 | 0.000385628 CD-ICA |
| CAVIN2-AS1  | 6.66E-177 | -0.254204154 | 0.974 | 0.084 | 1.33E-173 CD-ICA   |
| CA12        | 1.04E-05  | 0.259712658  | 0.941 | 0.874 | 0.020850947 CD-ICA |
| MIOX        | 1.04E-88  | -0.41468752  | 0.924 | 0.149 | 2.08E-85 CD-ICA    |
| FTCD        | 1.30E-74  | -0.555835076 | 0.922 | 0.174 | 2.59E-71 CD-ICA    |
| SLC4A1      | 1.31E-13  | 0.327211385  | 0.916 | 0.472 | 2.62E-10 CD-ICA    |
| RALYL       | 1.80E-10  | -0.334695472 | 0.894 | 0.381 | 3.59E-07 CD-ICA    |
| UNC5D       | 4.18E-07  | -0.324188289 | 0.877 | 0.413 | 0.000836929 CD-ICA |
| SLC6A13     | 7.00E-75  | -0.273560113 | 0.877 | 0.133 | 1.40E-71 CD-ICA    |
| SLCO5A1     | 1.47E-05  | 0.332788898  | 0.859 | 0.571 | 0.029361867 CD-ICA |
| EYA4        | 4.82E-34  | -0.27273852  | 0.859 | 0.225 | 9.64E-31 CD-ICA    |
| MARCHF1     | 1.37E-26  | -0.593305627 | 0.857 | 0.26  | 2.74E-23 CD-ICA    |
| ACSM2A      | 3.19E-24  | -0.512061779 | 0.848 | 0.249 | 6.38E-21 CD-ICA    |
| SLC12A3     | 6.79E-19  | -0.437158002 | 0.831 | 0.265 | 1.36E-15 CD-ICA    |
| LDLR        | 7.82E-33  | 0.256021279  | 0.745 | 0.112 | 1.56E-29 CD-ICA    |
| STAC2       | 2.69E-09  | 0.250280511  | 0.729 | 0.247 | 5.38E-06 CD-ICA    |

|            |           |              |       |       |                    |
|------------|-----------|--------------|-------|-------|--------------------|
| LINC01482  | 3.92E-20  | -0.252274615 | 0.706 | 0.11  | 7.83E-17 CD-ICA    |
| SLC12A1    | 1.60E-05  | -0.275787202 | 0.647 | 0.144 | 0.031926568 CD-ICA |
| ACTG1      | 6.84E-07  | 0.288200083  | 0.513 | 0.299 | 0.001367819 CD-ICA |
| LINC00871  | 3.83E-08  | -0.329935419 | 0.509 | 0.197 | 7.67E-05 CD-ICA    |
| HSP90B1    | 5.70E-10  | 0.838452091  | 0.494 | 0.313 | 1.14E-06 CD-ICA    |
| SQSTM1     | 4.51E-13  | 0.289751542  | 0.454 | 0.236 | 9.03E-10 CD-ICA    |
| SLC8A1-AS1 | 4.88E-25  | -0.462917767 | 0.437 | 0.298 | 9.76E-22 CD-ICA    |
| CACNA2D3   | 1.62E-22  | -0.257760615 | 0.42  | 0.166 | 3.24E-19 CD-ICA    |
| RGS6       | 1.34E-20  | -0.284672488 | 0.403 | 0.103 | 2.68E-17 CD-ICA    |
| SOX5       | 3.18E-33  | -0.250500499 | 0.39  | 0.243 | 6.36E-30 CD-ICA    |
| GALNTL6    | 8.93E-27  | 0.463769488  | 0.385 | 0.127 | 1.79E-23 CD-ICA    |
| ELF3       | 9.59E-25  | 0.432849652  | 0.375 | 0.116 | 1.92E-21 CD-ICA    |
| SPARCL1    | 9.94E-30  | 0.297447985  | 0.374 | 0.175 | 1.99E-26 CD-ICA    |
| EGR1       | 6.28E-30  | 0.480576224  | 0.359 | 0.089 | 1.26E-26 CD-ICA    |
| TMTC1      | 3.86E-35  | 0.288493659  | 0.351 | 0.199 | 7.72E-32 CD-ICA    |
| DDIT3      | 7.54E-34  | 0.370990816  | 0.346 | 0.097 | 1.51E-30 CD-ICA    |
| HSPA5      | 2.08E-37  | 0.482079246  | 0.342 | 0.163 | 4.16E-34 CD-ICA    |
| SPP1       | 9.19E-55  | 0.307041212  | 0.297 | 0.088 | 1.84E-51 CD-ICA    |
| PPM1E      | 2.03E-62  | 0.428423425  | 0.275 | 0.058 | 4.06E-59 CD-ICA    |
| ANO4       | 3.89E-128 | 0.40562213   | 0.165 | 0.052 | 7.78E-125 CD-ICA   |

**Table S3. Top 3 GO and top 5 KEGG enrichment in DEGs of scRNA-seq data**

| <b>ID</b>  | <b>Classification</b> | <b>Classification</b>                               | <b>P-value</b> | <b>Count</b> | <b>regulation</b> |
|------------|-----------------------|-----------------------------------------------------|----------------|--------------|-------------------|
| GO:0007155 | GO-BP                 | cell adhesion                                       | 4.25E-10       | 48           | UP                |
| GO:0030198 | GO-BP                 | extracellular matrix organization                   | 1.17E-09       | 29           | UP                |
| GO:0001666 | GO-BP                 | response to hypoxia                                 | 7.29E-06       | 21           | UP                |
| GO:0001655 | GO-BP                 | urogenital system development                       | 3.47E-11       | 30           | DOWN              |
| GO:0001822 | GO-BP                 | kidney development                                  | 3.51E-11       | 28           | DOWN              |
| GO:0045926 | GO-BP                 | negative regulation of growth                       | 4.78E-11       | 26           | DOWN              |
| GO:0005886 | GO-CC                 | plasma membrane                                     | 3.27E-20       | 251          | UP                |
| GO:0005887 | GO-CC                 | integral component of plasma membrane               | 3.33E-12       | 104          | UP                |
| GO:0005578 | GO-CC                 | proteinaceous extracellular matrix                  | 1.75E-10       | 35           | UP                |
| GO:0045177 | GO-CC                 | apical part of cell                                 | 6.69E-10       | 32           | DOWN              |
| GO:0062023 | GO-CC                 | collagen-containing extracellular matrix            | 1.14E-09       | 32           | DOWN              |
| GO:0016324 | GO-CC                 | apical plasma membrane                              | 4.03E-09       | 28           | DOWN              |
| GO:0044325 | GO-MF                 | ion channel binding                                 | 6.86E-05       | 15           | UP                |
| GO:0005201 | GO-MF                 | extracellular matrix structural constituent         | 1.58E-04       | 11           | UP                |
| GO:0050839 | GO-MF                 | cell adhesion molecule binding                      | 4.14E-04       | 10           | UP                |
| GO:0046873 | GO-MF                 | metal ion transmembrane transporter activity        | 1.41E-13       | 39           | DOWN              |
| GO:0015291 | GO-MF                 | secondary active transmembrane transporter activity | 1.46E-07       | 21           | DOWN              |
| GO:0015293 | GO-MF                 | symporter activity                                  | 1.74E-07       | 16           | DOWN              |
| hsa04510   | KEGG                  | Focal adhesion                                      | 0.001431117    | 206          | UP                |
| hsa04514   | KEGG                  | Cell adhesion molecules (CAMs)                      | 0.002452309    | 142          | UP                |
| hsa04020   | KEGG                  | Calcium signaling pathway                           | 0.004017716    | 179          | UP                |
| hsa04151   | KEGG                  | PI3K-Akt signaling pathway                          | 0.005444036    | 345          | UP                |
| hsa04350   | KEGG                  | TGF-beta signaling pathway                          | 0.005445321    | 84           | UP                |
| hsa04978   | KEGG                  | Mineral absorption                                  | 9.85E-09       | 60           | DOWN              |

|          |      |                                                      |             |     |      |
|----------|------|------------------------------------------------------|-------------|-----|------|
| hsa04020 | KEGG | Calcium signaling pathway                            | 4.75E-06    | 240 | DOWN |
| hsa04933 | KEGG | AGE-RAGE signaling pathway in diabetic complications | 0.00055677  | 100 | DOWN |
| hsa04360 | KEGG | Axon guidance                                        | 0.002154408 | 182 | DOWN |
| hsa04614 | KEGG | Renin-angiotensin system                             | 0.003790344 | 23  | DOWN |

**Table S4. Differentially expressed genes between normal and DKD samples in RNA-seq dataset GSE142025. ( $\log_2|\text{fold change}|>1$  &  $\text{fdr}<0.05$ )**

| <b>gene</b> | <b>Control_Mean</b> | <b>DKD_Mean</b> | <b>logFC</b> | <b>P-Value</b> | <b>fdr</b>  |
|-------------|---------------------|-----------------|--------------|----------------|-------------|
| A1CF        | 12.33214969         | 11.31925384     | -1.012895844 | 1.78E-05       | 0.000205405 |
| ABCA13      | 5.2127975           | 7.824244459     | 2.611446959  | 6.14E-05       | 0.000493555 |
| ABCA5       | 11.75060013         | 10.67370363     | -1.076896504 | 4.25E-08       | 5.08E-06    |
| ABCC11      | 4.849422444         | 3.6074133       | -1.242009144 | 0.014363836    | 0.031427397 |
| ABCC9       | 10.32655727         | 11.3793673      | 1.052810033  | 2.32E-05       | 0.000244525 |
| ABRA        | 5.153607344         | 6.480301111     | 1.326693767  | 2.55E-07       | 1.37E-05    |
| ACKR1       | 6.638152233         | 9.095325719     | 2.457173485  | 0.000218157    | 0.001239939 |
| ACOT12      | 8.602824011         | 7.221895244     | -1.380928767 | 7.63E-06       | 0.000114982 |
| ACTG2       | 2.825614611         | 4.632425485     | 1.806810874  | 0.009486163    | 0.022733565 |
| ADAM12      | 8.8278102           | 10.01318043     | 1.18537023   | 9.58E-05       | 0.000677876 |
| ADAM19      | 9.163101911         | 10.3156327      | 1.152530789  | 0.005281184    | 0.014283284 |
| ADAM33      | 7.400367478         | 8.46783937      | 1.067471893  | 9.58E-05       | 0.000677876 |
| ADAMTS17    | 9.917669089         | 8.623722333     | -1.293946756 | 5.63E-06       | 9.22E-05    |
| ADAMTS19    | 8.390299356         | 6.740195633     | -1.650103722 | 7.63E-06       | 0.000114982 |
| ADAMTS2     | 9.049490067         | 10.32930623     | 1.279816159  | 2.32E-05       | 0.000244525 |
| ADAMTS4     | 9.815865422         | 7.832169359     | -1.983696063 | 0.00307561     | 0.009346062 |
| ADCY7       | 10.04416172         | 11.27008563     | 1.225923911  | 0.000774288    | 0.003234177 |
| ADCYAP1R1   | 2.830482167         | 4.918022052     | 2.087539885  | 6.14E-05       | 0.000493555 |
| ADD2        | 4.027513011         | 5.03739473      | 1.009881719  | 0.015581059    | 0.033436314 |
| ADGRE1      | 4.692812367         | 5.858091352     | 1.165278985  | 0.006008756    | 0.015730247 |
| ADGRE2      | 8.006509078         | 9.051553259     | 1.045044181  | 0.017390195    | 0.036515989 |
| ADH1B       | 10.7880411          | 12.20465848     | 1.416617378  | 5.63E-06       | 9.22E-05    |
| ADM         | 10.9773636          | 9.958345293     | -1.019018307 | 0.000549885    | 0.002497649 |
| ADORA3      | 4.662049022         | 5.815959078     | 1.153910056  | 0.000549885    | 0.002497649 |
| ADRA2A      | 7.924352278         | 9.441408863     | 1.517056585  | 6.14E-05       | 0.000493555 |
| ADRB2       | 7.010593033         | 8.107435981     | 1.096842948  | 0.001473392    | 0.00531078  |
| AEBP1       | 12.78553297         | 13.96469196     | 1.179158993  | 0.000460787    | 0.00218016  |
| AFM         | 12.65285651         | 10.85444752     | -1.798408993 | 0.000264745    | 0.001432524 |
| AGAP2       | 6.792865311         | 8.26834417      | 1.475478859  | 0.001075106    | 0.004146384 |
| AGMO        | 9.398609444         | 8.387753963     | -1.010855481 | 7.63E-06       | 0.000114982 |
| AHNAK2      | 9.130979878         | 10.74435636     | 1.613376481  | 0.000178961    | 0.001075178 |
| AKNA        | 10.86311254         | 12.05049215     | 1.187379607  | 0.003534166    | 0.01039411  |
| ALB         | 13.34639328         | 11.22491236     | -2.121480915 | 0.000913862    | 0.003666212 |
| ALDH1A3     | 7.027692211         | 8.333538744     | 1.305846533  | 3.83E-05       | 0.000352659 |
| ALDH1L1-AS1 | 7.039298511         | 5.720991926     | -1.318306585 | 0.00038469     | 0.001915198 |
| ALDH1L1-AS2 | 8.551910322         | 7.526089863     | -1.025820459 | 7.69E-05       | 0.000583998 |
| ALDH1L2     | 7.510664589         | 8.529358026     | 1.018693437  | 4.87E-05       | 0.000416496 |
| ALDH6A1     | 15.54386516         | 14.50610682     | -1.037758337 | 0.000422048    | 0.002088054 |
| ALOX5       | 8.345898544         | 9.809915763     | 1.464017219  | 0.001075106    | 0.004146384 |
| ALOX5AP     | 7.129121211         | 8.186780837     | 1.057659626  | 0.000653663    | 0.002845514 |

|              |             |             |              |             |             |
|--------------|-------------|-------------|--------------|-------------|-------------|
| ALX1         | 4.947894167 | 6.853134604 | 1.905240437  | 9.56E-07    | 2.89E-05    |
| ANGPTL3      | 10.82754407 | 9.645637652 | -1.181906415 | 0.00307561  | 0.009346062 |
| ANKRD20A8P   | 6.645466911 | 4.366765859 | -2.278701052 | 0.003468583 | 0.01039411  |
| ANKRD24      | 9.586233633 | 8.489539015 | -1.096694619 | 0.000146054 | 0.000925394 |
| ANKRD36BP2   | 5.087327867 | 6.9996404   | 1.912312533  | 0.005281184 | 0.014283284 |
| AOC1         | 15.49056116 | 14.43575889 | -1.054802267 | 0.010538308 | 0.024773807 |
| APCDD1       | 7.557815311 | 9.234704389 | 1.676889078  | 1.42E-06    | 3.74E-05    |
| APOB         | 8.445080256 | 7.05127123  | -1.393809026 | 0.000319768 | 0.001658505 |
| APOBEC3G     | 7.449869667 | 8.688677556 | 1.238807889  | 4.87E-05    | 0.000416496 |
| APOC1        | 6.462165822 | 7.530925463 | 1.068759641  | 0.021539551 | 0.043500221 |
| APOC3        | 8.682986889 | 6.839985789 | -1.8430011   | 0.000653663 | 0.002845514 |
| APOH         | 9.9902918   | 8.013365963 | -1.976925837 | 4.87E-05    | 0.000416496 |
| AQP5         | 7.711732944 | 6.570928048 | -1.140804896 | 2.32E-05    | 0.000244525 |
| AQP6         | 11.52404472 | 10.44696648 | -1.077078244 | 0.000460787 | 0.00218016  |
| ARC          | 7.031117044 | 5.334294641 | -1.696822404 | 0.000208615 | 0.001239939 |
| ARHGAP15     | 7.665676444 | 8.887754885 | 1.222078441  | 0.002669612 | 0.008400777 |
| ARHGAP22     | 6.964294244 | 8.1595825   | 1.195288256  | 0.001473392 | 0.00531078  |
| ARHGAP30     | 9.392024244 | 10.71277007 | 1.32074583   | 0.00307561  | 0.009346062 |
| ARHGAP40     | 6.367429156 | 7.927165448 | 1.559736293  | 0.000549885 | 0.002497649 |
| ARHGAP9      | 8.355155111 | 9.809859233 | 1.454704122  | 0.001473392 | 0.00531078  |
| ARHGDIB      | 10.96088553 | 11.96502595 | 1.004140419  | 3.83E-05    | 0.000352659 |
| ARL11        | 5.334900156 | 6.808580552 | 1.473680396  | 4.87E-05    | 0.000416496 |
| ARL4C        | 9.112145822 | 10.276766   | 1.164620181  | 0.01755823  | 0.036781999 |
| ARNTL2       | 6.332939622 | 7.69466603  | 1.361726407  | 0.001260525 | 0.00468919  |
| ARPC1B       | 10.51652252 | 11.61995372 | 1.1034312    | 0.000118628 | 0.000798045 |
| ARPP21       | 6.690028    | 5.587333344 | -1.102694656 | 0.019372344 | 0.039844    |
| ASB15        | 10.08213772 | 7.961217733 | -2.120919989 | 0.000146054 | 0.000925394 |
| ASPA         | 10.96906732 | 9.897118611 | -1.071948711 | 4.87E-05    | 0.000416496 |
| ATF3         | 11.62255478 | 8.023168178 | -3.5993866   | 2.12E-08    | 4.42E-06    |
| ATOH7        | 5.691920178 | 4.365007385 | -1.326912793 | 0.019372344 | 0.039844    |
| ATP12A       | 9.415276911 | 7.790062926 | -1.625213985 | 0.005281184 | 0.014283284 |
| ATP6V0D2     | 12.09732534 | 10.74658345 | -1.350741896 | 4.08E-06    | 7.53E-05    |
| ATP6V1B1-AS1 | 9.501647644 | 8.353424074 | -1.14822357  | 0.003534166 | 0.01039411  |
| ATP6V1G3     | 8.340829278 | 7.001433915 | -1.339395363 | 1.42E-06    | 3.74E-05    |
| ATP8B2       | 10.70086954 | 11.89289293 | 1.192023389  | 1.42E-06    | 3.74E-05    |
| B3GALT5      | 5.0260178   | 6.611103189 | 1.585085389  | 2.32E-05    | 0.000244525 |
| BATF         | 3.660670656 | 5.541276315 | 1.880605659  | 0.002310776 | 0.007501587 |
| BATF3        | 5.552563322 | 6.581095811 | 1.028532489  | 0.000178961 | 0.001075178 |
| BCL11A       | 6.000082489 | 7.339066652 | 1.338984163  | 0.00984202  | 0.023183842 |
| BCL11B       | 7.752953589 | 9.060554633 | 1.307601044  | 0.000264745 | 0.001432524 |
| BEND4        | 3.945934367 | 5.199164544 | 1.253230178  | 0.001075765 | 0.004146384 |
| BEST1        | 7.531746156 | 8.8210695   | 1.289323344  | 2.12E-08    | 4.42E-06    |
| BHLHE40      | 13.62355478 | 12.46414767 | -1.159407104 | 4.25E-08    | 5.08E-06    |

|           |             |             |              |             |             |
|-----------|-------------|-------------|--------------|-------------|-------------|
| BIN2      | 7.996592644 | 9.115702793 | 1.119110148  | 0.006008756 | 0.015730247 |
| BLK       | 5.136583211 | 6.96151667  | 1.824933459  | 0.00307561  | 0.009346062 |
| BPI       | 7.393240644 | 6.18407833  | -1.209162315 | 0.011073759 | 0.025492733 |
| BRE-AS1   | 8.268543711 | 6.859700385 | -1.408843326 | 7.63E-06    | 0.000114982 |
| BTG2      | 13.22628386 | 11.78225789 | -1.444025963 | 1.49E-07    | 9.92E-06    |
| BTK       | 6.899271556 | 8.399807759 | 1.500536204  | 0.001473392 | 0.00531078  |
| C10orf105 | 5.488932422 | 6.663357437 | 1.174425015  | 0.000460787 | 0.00218016  |
| C10orf126 | 7.070503356 | 5.841921985 | -1.22858137  | 0.001260525 | 0.00468919  |
| C10orf128 | 7.310469433 | 8.851354581 | 1.540885148  | 1.36E-05    | 0.000170337 |
| C11orf21  | 6.3125772   | 7.823775815 | 1.511198615  | 0.003534166 | 0.01039411  |
| C11orf87  | 6.148432733 | 3.967394937 | -2.181037796 | 0.007724375 | 0.019082698 |
| C16orf54  | 6.850319533 | 8.542250796 | 1.691931263  | 0.001473392 | 0.00531078  |
| C1QA      | 10.23935414 | 11.79223606 | 1.552881915  | 7.69E-05    | 0.000583998 |
| C1QB      | 9.958126544 | 11.33299958 | 1.374873033  | 0.000460787 | 0.00218016  |
| C1QC      | 10.28154371 | 11.69884523 | 1.417301519  | 0.00038469  | 0.001915198 |
| C1QL1     | 6.979903289 | 5.513377948 | -1.466525341 | 0.001075106 | 0.004146384 |
| C1QTNF7   | 10.03121711 | 9.01059883  | -1.020618281 | 0.000549885 | 0.002497649 |
| C1R       | 11.35158157 | 12.83818146 | 1.486599889  | 3.83E-05    | 0.000352659 |
| C1S       | 11.34683039 | 13.02215654 | 1.675326148  | 4.87E-05    | 0.000416496 |
| C2orf54   | 10.47827016 | 8.799380274 | -1.678889881 | 0.019372344 | 0.039844    |
| C2orf71   | 7.758347678 | 6.060308756 | -1.698038922 | 6.14E-05    | 0.000493555 |
| C3        | 10.90777243 | 12.80551323 | 1.897740796  | 0.001994725 | 0.006703936 |
| C3orf80   | 3.1736251   | 4.5820058   | 1.4083807    | 0.003895688 | 0.011415893 |
| C7        | 14.89541542 | 15.92008013 | 1.024664707  | 0.000295355 | 0.001593303 |
| C9orf66   | 11.29516181 | 10.20257835 | -1.092583459 | 0.000218157 | 0.001239939 |
| CA8       | 9.013142233 | 7.649419785 | -1.363722448 | 4.04E-07    | 1.75E-05    |
| CACNA1E   | 10.70544922 | 9.438341937 | -1.267107285 | 0.004050528 | 0.011607841 |
| CACNB4    | 9.503174344 | 8.186023326 | -1.317151019 | 2.06E-06    | 4.71E-05    |
| CADM3     | 5.1543059   | 7.46433703  | 2.31003113   | 5.63E-06    | 9.22E-05    |
| CADM3-AS1 | 2.360052078 | 4.749357333 | 2.389305256  | 0.000178961 | 0.001075178 |
| CALB1     | 12.99860407 | 10.99391269 | -2.004691374 | 6.37E-07    | 2.28E-05    |
| CALCR     | 8.099282389 | 6.773383652 | -1.325898737 | 1.78E-05    | 0.000205405 |
| CAMK2A    | 9.281644389 | 8.058237204 | -1.223407185 | 0.000913862 | 0.003666212 |
| CAMK2B    | 9.0487346   | 7.865965519 | -1.182769081 | 0.000218157 | 0.001239939 |
| CAMK4     | 7.170090456 | 8.42003773  | 1.249947274  | 7.69E-05    | 0.000583998 |
| CAPN6     | 6.9513505   | 8.729255152 | 1.777904652  | 1.78E-05    | 0.000205405 |
| CAPN8     | 5.335695589 | 6.370380337 | 1.034684748  | 0.012434026 | 0.027890332 |
| CARD11    | 7.821391789 | 9.379212093 | 1.557820304  | 0.006820434 | 0.01737225  |
| CARMIL2   | 6.650241567 | 8.154137148 | 1.503895581  | 0.001994725 | 0.006703936 |
| CBARP     | 8.463451633 | 7.082066315 | -1.381385319 | 0.000118628 | 0.000798045 |
| CCDC129   | 6.825218156 | 5.319807063 | -1.505411093 | 2.93E-06    | 6.06E-05    |
| CCDC141   | 7.1521731   | 8.517090267 | 1.364917167  | 3.83E-05    | 0.000352659 |
| CCDC144A  | 6.425872122 | 4.687080374 | -1.738791748 | 0.002310776 | 0.007501587 |
| CCDC3     | 8.628975022 | 9.773059819 | 1.144084796  | 2.06E-06    | 4.71E-05    |

|         |             |             |              |             |             |
|---------|-------------|-------------|--------------|-------------|-------------|
| CCDC68  | 8.161369089 | 7.093740104 | -1.067628985 | 6.37E-07    | 2.28E-05    |
| CCDC80  | 10.23532364 | 11.64378107 | 1.408457422  | 4.08E-06    | 7.53E-05    |
| CCDC88B | 8.7243066   | 9.968910796 | 1.244604196  | 0.007724375 | 0.019082698 |
| CCL11   | 5.145652211 | 6.290786526 | 1.145134315  | 0.001075106 | 0.004146384 |
| CCL13   | 3.408471256 | 4.757228019 | 1.348756763  | 0.000460787 | 0.00218016  |
| CCL18   | 2.877541022 | 4.510185552 | 1.63264453   | 0.021539551 | 0.043500221 |
| CCL19   | 6.291406011 | 9.548851426 | 3.257445415  | 0.000944832 | 0.003780979 |
| CCL21   | 7.897609656 | 10.52219175 | 2.624582093  | 2.32E-05    | 0.000244525 |
| CCL3    | 6.772542433 | 4.890306674 | -1.882235759 | 0.000549885 | 0.002497649 |
| CCL5    | 7.840762078 | 9.0598282   | 1.219066122  | 0.001994725 | 0.006703936 |
| CCND2   | 10.60071577 | 12.0999016  | 1.499185837  | 1.78E-05    | 0.000205405 |
| CCR2    | 6.884678844 | 9.070185767 | 2.185506922  | 2.32E-05    | 0.000244525 |
| CCR4    | 5.140052856 | 6.652391167 | 1.512338311  | 0.001575974 | 0.005648741 |
| CCR5    | 6.647948511 | 8.158510348 | 1.510561837  | 0.001473392 | 0.00531078  |
| CCR7    | 6.194622022 | 7.671643485 | 1.477021463  | 0.006820434 | 0.01737225  |
| CD163   | 10.2962979  | 11.31758932 | 1.021291419  | 0.011073759 | 0.025492733 |
| CD163L1 | 8.104322744 | 9.488203419 | 1.383880674  | 0.000774288 | 0.003234177 |
| CD180   | 5.998786778 | 7.75431617  | 1.755529393  | 0.000146054 | 0.000925394 |
| CD19    | 5.131119011 | 6.662099011 | 1.53098      | 0.006820434 | 0.01737225  |
| CD1C    | 5.790598978 | 8.019138715 | 2.228539737  | 4.87E-05    | 0.000416496 |
| CD1D    | 5.7878925   | 7.28215273  | 1.49426023   | 0.000460787 | 0.00218016  |
| CD1E    | 4.257849044 | 6.167719444 | 1.9098704    | 0.006490941 | 0.016928889 |
| CD2     | 6.352683989 | 8.267703352 | 1.915019363  | 0.000653663 | 0.002845514 |
| CD200R1 | 5.476632733 | 6.893206981 | 1.416574248  | 0.000944832 | 0.003780979 |
| CD209   | 7.8290064   | 9.207645426 | 1.378639026  | 0.000913862 | 0.003666212 |
| CD22    | 7.3825472   | 8.498375952 | 1.115828752  | 0.004630835 | 0.012878433 |
| CD244   | 5.192443767 | 6.750996322 | 1.558552556  | 0.000319768 | 0.001658505 |
| CD247   | 6.179956789 | 7.582005259 | 1.40204847   | 0.00307561  | 0.009346062 |
| CD27    | 5.884159367 | 7.232600211 | 1.348440844  | 9.98E-05    | 0.000705623 |
| CD28    | 6.982748822 | 8.307880141 | 1.325131319  | 0.001994725 | 0.006703936 |
| CD300A  | 6.791478356 | 7.891137881 | 1.099659526  | 0.003534166 | 0.01039411  |
| CD300C  | 5.346645056 | 6.356146337 | 1.009501281  | 0.000549885 | 0.002497649 |
| CD300LF | 5.475010811 | 6.757774363 | 1.282763552  | 0.000460787 | 0.00218016  |
| CD33    | 6.467423678 | 7.838555004 | 1.371131326  | 0.000218157 | 0.001239939 |
| CD3D    | 4.902092267 | 7.008160041 | 2.106067774  | 0.000218157 | 0.001239939 |
| CD3E    | 6.985977433 | 8.52683027  | 1.540852837  | 0.00984202  | 0.023183842 |
| CD3G    | 5.255133044 | 6.672426489 | 1.417293444  | 0.006008756 | 0.015730247 |
| CD4     | 10.19317241 | 11.27678619 | 1.083613774  | 0.000319768 | 0.001658505 |
| CD40LG  | 4.715485411 | 5.967160833 | 1.251675422  | 0.006858785 | 0.017406247 |
| CD48    | 6.918694533 | 8.927105281 | 2.008410748  | 0.000653663 | 0.002845514 |
| CD5     | 7.641876067 | 8.676837344 | 1.034961278  | 0.001260525 | 0.00468919  |
| CD52    | 5.207623033 | 6.961974981 | 1.754351948  | 0.001994725 | 0.006703936 |
| CD53    | 8.681854956 | 10.10673372 | 1.424878767  | 0.002669612 | 0.008400777 |
| CD6     | 7.232906322 | 8.678985274 | 1.446078952  | 0.008728547 | 0.021002819 |



|           |             |             |              |             |             |
|-----------|-------------|-------------|--------------|-------------|-------------|
| CD7       | 5.590110067 | 7.195828215 | 1.605718148  | 0.001473392 | 0.00531078  |
| CD79A     | 5.724765411 | 8.036221141 | 2.31145573   | 0.001075106 | 0.004146384 |
| CD79B     | 6.292710211 | 8.078054374 | 1.785344163  | 7.69E-05    | 0.000583998 |
| CD80      | 5.160604778 | 6.376415141 | 1.215810363  | 7.63E-06    | 0.000114982 |
| CD84      | 8.490498656 | 9.92630803  | 1.435809374  | 0.001716851 | 0.005987476 |
| CD8A      | 6.738865978 | 8.077990759 | 1.339124781  | 0.001260525 | 0.00468919  |
| CD96      | 6.618562433 | 7.909143307 | 1.290580874  | 0.011073759 | 0.025492733 |
| CDC20     | 6.559541844 | 7.562041567 | 1.002499722  | 1.42E-06    | 3.74E-05    |
| CDC20B    | 7.387731744 | 6.030965074 | -1.35676667  | 0.001260525 | 0.00468919  |
| CDH11     | 10.38381627 | 11.49339539 | 1.109579122  | 0.000319768 | 0.001658505 |
| CDH19     | 5.502126422 | 4.179335633 | -1.322790789 | 1.78E-05    | 0.000205405 |
| CDH20     | 9.314210622 | 7.960671144 | -1.353539478 | 0.005281184 | 0.014283284 |
| CDFN      | 7.529288444 | 6.519111689 | -1.010176756 | 0.000146054 | 0.000925394 |
| CEACAM21  | 5.222867667 | 6.517354015 | 1.294486348  | 0.000394196 | 0.001952805 |
| CEACAM4   | 4.209137789 | 5.281430948 | 1.072293159  | 0.005808024 | 0.015628954 |
| CEL       | 9.826213978 | 7.993973244 | -1.832240733 | 0.000319768 | 0.001658505 |
| CFD       | 7.439540844 | 9.599079633 | 2.159538789  | 3.11E-05    | 0.000305214 |
| CFHR1     | 3.262918256 | 6.569519048 | 3.306600793  | 2.06E-06    | 4.71E-05    |
| CFP       | 6.340866689 | 7.617240559 | 1.27637387   | 0.000460787 | 0.00218016  |
| CHAD      | 11.59785884 | 10.40634663 | -1.191512211 | 9.58E-05    | 0.000677876 |
| CHI3L1    | 10.40923698 | 8.657188941 | -1.752048037 | 5.63E-06    | 9.22E-05    |
| CHI3L2    | 3.881866456 | 6.109057789 | 2.227191333  | 4.87E-05    | 0.000416496 |
| CHP2      | 8.272734856 | 6.596147996 | -1.676586859 | 0.00984202  | 0.023183842 |
| CHRM3-AS2 | 6.598703467 | 5.204969037 | -1.39373443  | 2.12E-08    | 4.42E-06    |
| CHRNA4    | 10.68741641 | 9.471592111 | -1.2158243   | 0.001716851 | 0.005987476 |
| CHRN2     | 6.799499944 | 7.959765767 | 1.160265822  | 1.42E-06    | 3.74E-05    |
| CHRN4     | 6.516380444 | 5.330063307 | -1.186317137 | 0.000264745 | 0.001432524 |
| CHST15    | 10.04996629 | 11.11264311 | 1.062676819  | 7.63E-06    | 0.000114982 |
| CIB2      | 7.470002967 | 8.561040011 | 1.091037044  | 3.00E-05    | 0.000295866 |
| CIDEC     | 0.840623189 | 3.768894989 | 2.9282718    | 0.007237761 | 0.018349216 |
| CILP      | 6.676426844 | 7.809328    | 1.132901156  | 0.000118628 | 0.000798045 |
| CLDN8     | 10.68481406 | 9.575298496 | -1.109515559 | 5.63E-06    | 9.22E-05    |
| CLEC10A   | 7.197792911 | 9.256842933 | 2.059050022  | 6.14E-05    | 0.000493555 |
| CLEC17A   | 4.553410333 | 5.976332481 | 1.422922148  | 0.023500502 | 0.047263728 |
| CLEC4C    | 1.584034544 | 4.021489041 | 2.437454496  | 0.006008756 | 0.015730247 |
| CLIC5     | 13.47221734 | 12.25551832 | -1.216699022 | 7.69E-05    | 0.000583998 |
| CLIC6     | 7.071278744 | 8.328516437 | 1.257237693  | 0.001389359 | 0.005136232 |
| CLNK      | 10.56178561 | 9.433994059 | -1.127791552 | 1.42E-06    | 3.74E-05    |
| CNNM1     | 6.535977311 | 7.971970796 | 1.435993485  | 4.25E-08    | 5.08E-06    |
| CNR2      | 3.071346689 | 5.407100981 | 2.335754293  | 0.00038469  | 0.001915198 |
| CNTNAP5   | 7.460067633 | 6.064800526 | -1.395267107 | 0.000653663 | 0.002845514 |
| COL14A1   | 10.99207379 | 12.52046487 | 1.528391085  | 2.93E-06    | 6.06E-05    |
| COL15A1   | 10.95469014 | 11.95628115 | 1.001591007  | 0.001473392 | 0.00531078  |
| COL16A1   | 10.60999892 | 11.86115161 | 1.251152685  | 0.001479958 | 0.005317687 |

|               |             |             |              |             |             |
|---------------|-------------|-------------|--------------|-------------|-------------|
| COL1A1        | 11.80353904 | 13.79580516 | 1.992266115  | 0.000218157 | 0.001239939 |
| COL1A2        | 12.73902318 | 14.24486621 | 1.50584303   | 0.000298025 | 0.001598018 |
| COL3A1        | 12.48482439 | 14.34333914 | 1.858514748  | 0.000194067 | 0.001160272 |
| COL5A1        | 10.66195622 | 12.18291671 | 1.520960485  | 7.69E-05    | 0.000583998 |
| COL6A3        | 11.51791641 | 13.5073033  | 1.989386885  | 5.63E-06    | 9.22E-05    |
| COL6A4P2      | 9.660073044 | 8.288574867 | -1.371498178 | 4.87E-05    | 0.000416496 |
| COL6A5        | 1.908552056 | 5.178802967 | 3.270250911  | 0.00038469  | 0.001915198 |
| COL8A1        | 8.959229056 | 10.03480419 | 1.075575137  | 0.002669612 | 0.008400777 |
| COL8A2        | 6.745708467 | 8.066667185 | 1.320958719  | 3.83E-05    | 0.000352659 |
| COMP          | 5.992262711 | 7.252170359 | 1.259907648  | 0.001223312 | 0.00468912  |
| CORO1A        | 9.0911919   | 10.8071116  | 1.715919696  | 0.000913862 | 0.003666212 |
| CP            | 7.988462033 | 9.47377213  | 1.485310096  | 0.001075106 | 0.004146384 |
| CPA3          | 5.861161889 | 7.679366148 | 1.818204259  | 0.004050528 | 0.011607841 |
| CPA4          | 3.049040978 | 5.082061367 | 2.033020389  | 0.008524606 | 0.02093045  |
| CPXM1         | 8.080663933 | 9.428111237 | 1.347447304  | 0.00984202  | 0.023183842 |
| CPZ           | 6.4123979   | 8.05477587  | 1.64237797   | 9.58E-05    | 0.000677876 |
| CR2           | 10.66337946 | 8.539779581 | -2.123599874 | 0.001075106 | 0.004146384 |
| CRABP1        | 7.947589811 | 6.142875637 | -1.804714174 | 0.000913862 | 0.003666212 |
| CRACR2A       | 6.892071989 | 8.060477341 | 1.168405352  | 2.06E-06    | 4.71E-05    |
| CREB3L3       | 7.800857533 | 6.203599259 | -1.597258274 | 0.001260525 | 0.00468919  |
| CRHBP         | 10.84785521 | 9.777348278 | -1.070506933 | 9.58E-05    | 0.000677876 |
| CRLF1         | 5.617943733 | 7.357226    | 1.739282267  | 7.63E-06    | 0.000114982 |
| CRTAM         | 3.851721889 | 5.168588133 | 1.316866244  | 0.002310776 | 0.007501587 |
| CSF1R         | 11.12732497 | 12.2571714  | 1.12984643   | 0.002425828 | 0.007852797 |
| CSF2RB        | 8.586599178 | 9.894864274 | 1.308265096  | 0.005281184 | 0.014283284 |
| CSMD3         | 5.493930211 | 4.096103144 | -1.397827067 | 0.008728547 | 0.021002819 |
| CSRNP1        | 11.41513701 | 10.21259812 | -1.202538889 | 2.93E-06    | 6.06E-05    |
| CST6          | 3.439257756 | 4.999418959 | 1.560161204  | 0.021539551 | 0.043500221 |
| CTD-3080P12.3 | 9.856079122 | 8.283381074 | -1.572698048 | 0.000178961 | 0.001075178 |
| CTH           | 10.12288918 | 9.076068167 | -1.046821011 | 0.000218157 | 0.001239939 |
| CTNNA3        | 7.184064411 | 6.061222793 | -1.122841619 | 0.000178961 | 0.001075178 |
| CTSG          | 4.282999467 | 6.333383278 | 2.050383811  | 0.001260525 | 0.00468919  |
| CTSK          | 8.665340178 | 9.72052077  | 1.055180593  | 1.36E-05    | 0.000170337 |
| CTSLP8        | 6.3144884   | 4.827559352 | -1.486929048 | 0.001075106 | 0.004146384 |
| CTSS          | 9.801833422 | 11.07496479 | 1.273131363  | 0.011073759 | 0.025492733 |
| CTSV          | 10.50472043 | 8.869506504 | -1.63521393  | 0.000118628 | 0.000798045 |
| CUX2          | 4.120331711 | 5.613639178 | 1.493307467  | 0.000726099 | 0.003136112 |
| CXCL2         | 7.669911933 | 6.117584533 | -1.5523274   | 0.006858785 | 0.017406247 |
| CXCL3         | 5.321962978 | 4.14770387  | -1.174259107 | 0.007651151 | 0.019082698 |
| CXCL6         | 4.810388089 | 6.883232489 | 2.0728444    | 0.004630835 | 0.012878433 |
| CXCR1         | 5.5327209   | 4.344860552 | -1.187860348 | 0.001147348 | 0.004402156 |
| CXCR3         | 5.877940333 | 7.436164989 | 1.558224656  | 3.00E-05    | 0.000295866 |
| CXCR5         | 5.787639411 | 7.281249559 | 1.493610148  | 0.000146054 | 0.000925394 |

|           |             |             |              |             |             |
|-----------|-------------|-------------|--------------|-------------|-------------|
| CXXC4-AS1 | 6.646022233 | 4.861864007 | -1.784158226 | 0.001075106 | 0.004146384 |
| CYBB      | 10.03230253 | 11.2148741  | 1.18257157   | 0.008728547 | 0.021002819 |
| CYP26B1   | 11.03590424 | 8.998907222 | -2.036997022 | 1.78E-05    | 0.000205405 |
| CYP27B1   | 11.91612382 | 10.05024763 | -1.865876196 | 4.08E-06    | 7.53E-05    |
| CYP2B6    | 10.98362548 | 9.857868456 | -1.125757022 | 0.004050528 | 0.011607841 |
| CYP2C8    | 7.644929767 | 6.252652337 | -1.39227743  | 0.000218157 | 0.001239939 |
| CYP2W1    | 7.446635956 | 6.419616333 | -1.027019622 | 0.004050528 | 0.011607841 |
| CYP3A4    | 8.446663678 | 7.1651765   | -1.281487178 | 3.00E-05    | 0.000295866 |
| CYP3A5    | 11.90295479 | 10.80146389 | -1.101490896 | 0.000653663 | 0.002845514 |
| CYP3A7    | 6.926887711 | 5.228742604 | -1.698145107 | 9.58E-05    | 0.000677876 |
| CYP4A11   | 15.01264999 | 13.7278596  | -1.284790393 | 0.0001075   | 0.000756011 |
| CYP4F11   | 10.66995931 | 9.327484504 | -1.342474807 | 0.003534166 | 0.01039411  |
| CYP4F2    | 13.21608544 | 11.69841557 | -1.517669878 | 0.000653663 | 0.002845514 |
| CYP4F3    | 13.22296313 | 12.1158529  | -1.107110237 | 0.001260525 | 0.00468919  |
| CYP4Z1    | 7.997762178 | 6.244127141 | -1.753635037 | 0.000146054 | 0.000925394 |
| CYR61     | 13.21558312 | 10.96666387 | -2.248919256 | 8.50E-08    | 7.43E-06    |
| DAPP1     | 5.976466489 | 7.360305378 | 1.383838889  | 0.006008756 | 0.015730247 |
| DCANP1    | 3.119043144 | 6.341527693 | 3.222484548  | 4.08E-06    | 7.53E-05    |
| DDN       | 11.44808307 | 9.496274752 | -1.951808315 | 5.63E-06    | 9.22E-05    |
| DDX3Y     | 9.8341455   | 7.325249156 | -2.508896344 | 0.004375143 | 0.012482254 |
| DEF6      | 7.8019449   | 9.196806856 | 1.394861956  | 0.001994725 | 0.006703936 |
| DEPDC1B   | 7.7992295   | 6.408101496 | -1.391128004 | 1.02E-05    | 0.00013953  |
| DEPDC7    | 9.6993153   | 8.220307067 | -1.479008233 | 9.56E-07    | 2.89E-05    |
| DERL3     | 7.805627656 | 9.04177743  | 1.236149774  | 0.002310776 | 0.007501587 |
| DES       | 6.602431089 | 7.884420374 | 1.281989285  | 0.007724375 | 0.019082698 |
| DGKA      | 8.797194411 | 10.00725003 | 1.210055615  | 0.000913862 | 0.003666212 |
| DGKB      | 8.9673019   | 7.932511663 | -1.034790237 | 0.00307561  | 0.009346062 |
| DHDH      | 9.745982633 | 8.642932322 | -1.103050311 | 0.019372344 | 0.039844    |
| DHRS9     | 3.220362378 | 5.247141859 | 2.026779481  | 0.001716851 | 0.005987476 |
| DKK3      | 10.34422584 | 11.47563106 | 1.131405219  | 8.50E-08    | 7.43E-06    |
| DLGAP1    | 7.468499467 | 8.856464959 | 1.387965493  | 0.008077315 | 0.019911607 |
| DLGAP2    | 9.987824744 | 8.356275267 | -1.631549478 | 0.00038469  | 0.001915198 |
| DMRT2     | 11.2141091  | 9.920854078 | -1.293255022 | 2.32E-05    | 0.000244525 |
| DNMT3L    | 8.0417178   | 6.895973581 | -1.145744219 | 0.012434026 | 0.027890332 |
| DOCK2     | 9.526597889 | 11.0021077  | 1.475509811  | 0.008077315 | 0.019911607 |
| DOK2      | 7.083236233 | 8.396706515 | 1.313470281  | 0.000178961 | 0.001075178 |
| DPEP1     | 15.27320343 | 14.10283553 | -1.170367904 | 0.001074965 | 0.004146384 |
| DPP4      | 13.90589111 | 12.7407626  | -1.165128507 | 8.50E-08    | 7.43E-06    |
| DPP6      | 9.735478289 | 8.082997422 | -1.652480867 | 2.55E-07    | 1.37E-05    |
| DRAIC     | 10.33671837 | 8.71947293  | -1.617245437 | 0.000178961 | 0.001075178 |
| DRP2      | 3.275294833 | 5.213282381 | 1.937987548  | 0.00290477  | 0.009088973 |
| DUSP1     | 13.66630527 | 10.49901248 | -3.167292785 | 4.25E-08    | 5.08E-06    |
| DUSP2     | 8.441487533 | 6.497797822 | -1.943689711 | 2.32E-05    | 0.000244525 |
| DUSP5     | 10.34923759 | 9.262209504 | -1.087028085 | 0.000319768 | 0.001658505 |

|           |             |             |              |             |             |
|-----------|-------------|-------------|--------------|-------------|-------------|
| DUSP8     | 10.29392331 | 9.270601322 | -1.023321989 | 0.000218157 | 0.001239939 |
| E2F2      | 4.477741578 | 5.870206207 | 1.39246463   | 0.008728547 | 0.021002819 |
| E2F7      | 3.687489178 | 4.971948085 | 1.284458907  | 0.011110171 | 0.025536167 |
| EGF       | 13.81578759 | 11.90754596 | -1.90824163  | 0.000118628 | 0.000798045 |
| EGR1      | 13.72555057 | 9.699180122 | -4.026370444 | 8.50E-08    | 7.43E-06    |
| EGR2      | 7.880956456 | 6.308376167 | -1.572580289 | 0.007724375 | 0.019082698 |
| EGR3      | 8.3392152   | 5.962652074 | -2.376563126 | 1.36E-05    | 0.000170337 |
| EIF1AY    | 7.346166922 | 5.349847674 | -1.996319248 | 0.01589401  | 0.034016708 |
| ELK2AP    | 3.018946122 | 4.87033623  | 1.851390107  | 0.013932678 | 0.030533275 |
| ELOVL4    | 7.034278211 | 5.87515677  | -1.159121441 | 1.36E-05    | 0.000170337 |
| EMILIN1   | 11.26443051 | 12.35564977 | 1.091219259  | 1.78E-05    | 0.000205405 |
| EMILIN2   | 8.541497311 | 9.612195896 | 1.070698585  | 0.000178961 | 0.001075178 |
| EMP3      | 8.945690778 | 10.04002868 | 1.094337904  | 4.08E-06    | 7.53E-05    |
| EOMES     | 5.027386411 | 6.776252815 | 1.748866404  | 4.87E-05    | 0.000416496 |
| EPHB2     | 8.409753678 | 9.662491719 | 1.252738041  | 8.50E-08    | 7.43E-06    |
| ERFE      | 5.961004222 | 7.923794307 | 1.962790085  | 2.93E-06    | 6.06E-05    |
| ERRFI1    | 12.45848727 | 10.80557471 | -1.652912559 | 0.000178961 | 0.001075178 |
| ESM1      | 9.226815144 | 7.421463    | -1.805352144 | 1.36E-05    | 0.000170337 |
| ETNPPL    | 7.9827826   | 6.273288719 | -1.709493881 | 0.011073759 | 0.025492733 |
| ETV4      | 7.284796833 | 8.554272774 | 1.269475941  | 2.06E-06    | 4.71E-05    |
| F11       | 10.96571278 | 9.873321611 | -1.092391167 | 0.001075106 | 0.004146384 |
| F3        | 9.738708122 | 8.422134115 | -1.316574007 | 6.37E-07    | 2.28E-05    |
| FAAHP1    | 7.7481454   | 6.655758496 | -1.092386904 | 0.000653663 | 0.002845514 |
| FABP4     | 5.994825656 | 7.849825689 | 1.855000033  | 3.83E-05    | 0.000352659 |
| FAIM2     | 6.027616567 | 7.645721785 | 1.618105219  | 4.63E-05    | 0.000416496 |
| FAM129C   | 5.671827133 | 7.593159    | 1.921331867  | 0.001716851 | 0.005987476 |
| FAM131B   | 5.007508678 | 6.169693148 | 1.16218447   | 0.000394196 | 0.001952805 |
| FAM151A   | 14.17637663 | 12.89622454 | -1.280152096 | 0.00437262  | 0.012482254 |
| FAM153B   | 6.800079667 | 5.702516041 | -1.097563626 | 0.000218157 | 0.001239939 |
| FAM159A   | 4.441746067 | 6.003404963 | 1.561658896  | 0.001785428 | 0.006206359 |
| FAM180A   | 7.889348733 | 6.794307007 | -1.095041726 | 1.78E-05    | 0.000205405 |
| FAM30A    | 6.351202511 | 8.542521548 | 2.191319037  | 0.006008756 | 0.015730247 |
| FAM3D     | 6.710521989 | 5.190127889 | -1.5203941   | 0.000460787 | 0.00218016  |
| FAM3D-AS1 | 7.404473367 | 6.267546793 | -1.136926574 | 0.000653663 | 0.002845514 |
| FAM65B    | 9.510836544 | 10.58164575 | 1.070809204  | 0.015581059 | 0.033436314 |
| FAM78A    | 7.934312678 | 9.32697393  | 1.392661252  | 9.58E-05    | 0.000677876 |
| FAM83D    | 8.779942767 | 7.749353411 | -1.030589356 | 0.015581059 | 0.033436314 |
| FAM95A    | 5.997141111 | 3.53247743  | -2.464663681 | 0.005281184 | 0.014283284 |
| FAP       | 4.103895622 | 6.188766693 | 2.08487107   | 0.000913862 | 0.003666212 |
| FASLG     | 4.373546344 | 5.537466167 | 1.163919822  | 0.006008756 | 0.015730247 |
| FBLIM1    | 10.41087881 | 11.5476931  | 1.136814289  | 3.83E-05    | 0.000352659 |
| FBLN1     | 11.1364541  | 12.17581855 | 1.039364452  | 7.69E-05    | 0.000583998 |
| FBN1      | 11.48794711 | 12.81780822 | 1.329861111  | 1.91E-05    | 0.000218314 |
| FBN3      | 10.12033954 | 8.694712719 | -1.425626826 | 5.63E-06    | 9.22E-05    |

|            |             |             |              |             |             |
|------------|-------------|-------------|--------------|-------------|-------------|
| FBXO41     | 7.724348011 | 8.926689478 | 1.202341467  | 0.000146054 | 0.000925394 |
| FCER1A     | 6.3552762   | 8.025326356 | 1.670050156  | 0.001260525 | 0.00468919  |
| FCER2      | 3.1824043   | 5.266271204 | 2.083866904  | 0.000885052 | 0.003666212 |
| FCGR1CP    | 3.201942467 | 4.429051707 | 1.227109241  | 0.007651151 | 0.019082698 |
| FCGR2B     | 6.457705022 | 7.9391933   | 1.481488278  | 0.002669612 | 0.008400777 |
| FCGR2C     | 7.720487356 | 8.870206667 | 1.149719311  | 0.001260525 | 0.00468919  |
| FCHO1      | 6.759641456 | 8.13032177  | 1.370680315  | 0.004630835 | 0.012878433 |
| FCMR       | 6.720828044 | 8.37578013  | 1.654952085  | 0.004630835 | 0.012878433 |
| FCN3       | 9.819321489 | 8.719088522 | -1.100232967 | 0.017390195 | 0.036515989 |
| FCRL1      | 5.082060256 | 7.113447293 | 2.031387037  | 0.006820434 | 0.01737225  |
| FCRL2      | 3.667241289 | 6.264076296 | 2.596835007  | 0.00038469  | 0.001915198 |
| FCRL3      | 4.769503144 | 6.709134937 | 1.939631793  | 0.003677591 | 0.010800057 |
| FCRL5      | 5.713715967 | 7.875160059 | 2.161444093  | 0.003534166 | 0.01039411  |
| FCRL6      | 5.792286333 | 6.99099477  | 1.198708437  | 0.005281184 | 0.014283284 |
| FCRLA      | 3.475138511 | 5.458228178 | 1.983089667  | 0.008728547 | 0.021002819 |
| FER1L6     | 11.58725309 | 10.08755373 | -1.499699363 | 0.001260525 | 0.00468919  |
| FER1L6-AS1 | 7.029665578 | 4.768658648 | -2.26100693  | 0.000178961 | 0.001075178 |
| FER1L6-AS2 | 5.769156144 | 3.2528754   | -2.516280744 | 0.000218157 | 0.001239939 |
| FERMT3     | 9.159526678 | 10.26969732 | 1.110170641  | 0.000319768 | 0.001658505 |
| FGD2       | 8.746928478 | 10.2707429  | 1.523814422  | 0.000146054 | 0.000925394 |
| FGF1       | 12.43400349 | 11.37755169 | -1.056451804 | 0.000146054 | 0.000925394 |
| FGF9       | 10.74153398 | 9.654431874 | -1.087102104 | 0.000118628 | 0.000798045 |
| FHL2       | 9.531775256 | 10.56761128 | 1.035836026  | 4.87E-05    | 0.000416496 |
| FLJ16779   | 7.195227467 | 8.513960174 | 1.318732707  | 0.019372344 | 0.039844    |
| FLJ31356   | 7.390484089 | 5.523505337 | -1.866978752 | 4.25E-08    | 5.08E-06    |
| FMN2       | 9.607286489 | 7.434722711 | -2.172563778 | 2.12E-08    | 4.42E-06    |
| FMOD       | 8.880196467 | 10.26886295 | 1.388666481  | 2.93E-06    | 6.06E-05    |
| FN1        | 13.27529703 | 14.35584898 | 1.080551944  | 0.001677697 | 0.005987476 |
| FN3K       | 13.05059438 | 12.01145528 | -1.039139096 | 4.87E-05    | 0.000416496 |
| FNDC1      | 8.102986167 | 9.213446267 | 1.1104601    | 0.000460787 | 0.00218016  |
| FNDC4      | 6.221085667 | 7.770645248 | 1.549559581  | 2.06E-06    | 4.71E-05    |
| FOLH1      | 10.96363697 | 9.761796107 | -1.201840859 | 1.78E-05    | 0.000205405 |
| FOLH1B     | 9.7027696   | 8.288571248 | -1.414198352 | 0.000460787 | 0.00218016  |
| FOLR2      | 8.207715111 | 9.487954789 | 1.280239678  | 0.000224182 | 0.00126923  |
| FOS        | 13.90810654 | 9.275198059 | -4.632908485 | 9.56E-07    | 2.89E-05    |
| FOSB       | 11.60375141 | 5.848817196 | -5.754934215 | 3.11E-05    | 0.000305214 |
| FOXCUT     | 7.746797556 | 6.629134596 | -1.117662959 | 4.87E-05    | 0.000416496 |
| FOXF1      | 7.696104022 | 5.936799111 | -1.759304911 | 4.04E-07    | 1.75E-05    |
| FOXI2      | 8.757720667 | 7.368441333 | -1.389279333 | 0.000264745 | 0.001432524 |
| FOXJ1      | 7.039241567 | 8.36585577  | 1.326614204  | 2.32E-05    | 0.000244525 |
| FRMD1      | 11.54730527 | 10.27068526 | -1.276620011 | 9.56E-07    | 2.89E-05    |
| FSTL1      | 11.78835527 | 12.90835102 | 1.119995752  | 5.63E-06    | 9.22E-05    |
| FUT7       | 3.580484378 | 5.404210093 | 1.823725715  | 2.65E-05    | 0.000276475 |
| FZD10-AS1  | 3.804040489 | 4.805842196 | 1.001801707  | 0.024644453 | 0.048659802 |

|          |             |             |              |             |             |
|----------|-------------|-------------|--------------|-------------|-------------|
| G6PC     | 14.47844187 | 12.35063719 | -2.127804674 | 9.56E-07    | 2.89E-05    |
| GABRA2   | 8.841842067 | 7.564413826 | -1.277428241 | 0.000549885 | 0.002497649 |
| GABRB2   | 9.199456244 | 8.124947133 | -1.074509111 | 0.00038469  | 0.001915198 |
| GABRP    | 6.885567456 | 8.103699215 | 1.218131759  | 0.001716851 | 0.005987476 |
| GAD1     | 9.878036811 | 7.942162448 | -1.935874363 | 2.87E-05    | 0.000295866 |
| GADD45B  | 11.48604103 | 9.724890526 | -1.761150507 | 2.12E-08    | 4.42E-06    |
| GADL1    | 5.144464144 | 3.440856337 | -1.703607807 | 0.010543297 | 0.024773807 |
| GALNT5   | 5.204975789 | 6.720696581 | 1.515720793  | 0.003534166 | 0.01039411  |
| GAPT     | 4.5523229   | 5.83227663  | 1.27995373   | 0.005808024 | 0.015628954 |
| GAS2L1P2 | 7.849575511 | 6.726014493 | -1.123561019 | 0.004050528 | 0.011607841 |
| GAS7     | 8.788463522 | 10.03987736 | 1.251413841  | 4.87E-05    | 0.000416496 |
| GBP5     | 7.538040444 | 8.605252141 | 1.067211696  | 0.012434026 | 0.027890332 |
| GCGR     | 10.70491078 | 9.494003815 | -1.210906963 | 0.000258643 | 0.001432524 |
| GCH1     | 10.8027305  | 9.712960893 | -1.089769607 | 4.04E-07    | 1.75E-05    |
| GDF15    | 11.98193462 | 9.951957507 | -2.029977115 | 2.55E-07    | 1.37E-05    |
| GDF5     | 2.380285522 | 4.24638107  | 1.866095548  | 0.002283003 | 0.007501587 |
| GFI1     | 5.951252356 | 7.012796152 | 1.061543796  | 0.01589401  | 0.034016708 |
| GFI1B    | 1.661551744 | 2.987315533 | 1.325763789  | 0.006140938 | 0.016044805 |
| GFRA1    | 11.22247623 | 12.57805227 | 1.355576033  | 5.63E-06    | 9.22E-05    |
| GFRA2    | 6.014714356 | 7.4541302   | 1.439415844  | 1.49E-07    | 9.92E-06    |
| GGACT    | 11.38954968 | 10.22555577 | -1.163993904 | 0.001716851 | 0.005987476 |
| GGTLC2   | 6.608075011 | 5.262381115 | -1.345693896 | 0.004375143 | 0.012482254 |
| GINS2    | 5.407803633 | 6.578376504 | 1.17057287   | 5.63E-06    | 9.22E-05    |
| GIPC2    | 11.82276112 | 10.79324711 | -1.029514007 | 4.25E-08    | 5.08E-06    |
| GJA3     | 7.726328333 | 5.944862515 | -1.781465819 | 1.42E-06    | 3.74E-05    |
| GLB1L3   | 6.736243922 | 5.405994533 | -1.330249389 | 0.002669612 | 0.008400777 |
| GLI1     | 7.139494511 | 8.174794219 | 1.035299707  | 0.000774288 | 0.003234177 |
| GLIPR1   | 7.855997644 | 8.87175613  | 1.015758485  | 0.004050528 | 0.011607841 |
| GLIPR2   | 7.704215933 | 9.132443741 | 1.428227807  | 1.02E-05    | 0.00013953  |
| GLIS1    | 10.85208579 | 9.846231607 | -1.005854181 | 1.42E-06    | 3.74E-05    |
| GMIP     | 8.916029122 | 10.01245262 | 1.096423496  | 0.004630835 | 0.012878433 |
| GOLGA6L3 | 6.584334289 | 5.392563885 | -1.191770404 | 2.65E-05    | 0.000276475 |
| GPAT3    | 13.53403934 | 11.94190589 | -1.592133459 | 1.49E-07    | 9.92E-06    |
| GPC5     | 7.304875189 | 6.113254015 | -1.191621174 | 0.006820434 | 0.01737225  |
| GPR161   | 8.685450467 | 9.703453937 | 1.01800347   | 2.12E-08    | 4.42E-06    |
| GPR20    | 6.216187167 | 5.21383483  | -1.002352337 | 0.008077315 | 0.019911607 |
| GPR26    | 6.867634389 | 5.518896741 | -1.348737648 | 0.000653663 | 0.002845514 |
| GPR3     | 5.545507044 | 4.139918544 | -1.4055885   | 0.000549885 | 0.002497649 |
| GPR4     | 9.118478011 | 8.012542556 | -1.105935456 | 3.00E-05    | 0.000295866 |
| GPR55    | 3.451755611 | 5.2590784   | 1.807322789  | 0.004050528 | 0.011607841 |
| GPR65    | 6.721343522 | 7.767686281 | 1.046342759  | 0.00307561  | 0.009346062 |
| GPRC6A   | 6.160393533 | 4.052607733 | -2.1077858   | 0.001716851 | 0.005987476 |
| GRAP2    | 6.700119156 | 8.228602119 | 1.528482963  | 0.003534166 | 0.01039411  |
| GREM1    | 2.222857511 | 5.764035985 | 3.541178474  | 3.83E-05    | 0.000352659 |

|           |             |             |              |             |             |
|-----------|-------------|-------------|--------------|-------------|-------------|
| GRIA2     | 6.120899889 | 4.207040878 | -1.913859011 | 2.32E-05    | 0.000244525 |
| GRIK4     | 4.763014544 | 5.959975293 | 1.196960748  | 0.000180304 | 0.001082024 |
| GRIN2A    | 8.379907578 | 9.627282856 | 1.247375278  | 0.00307561  | 0.009346062 |
| GRK6P1    | 5.909254133 | 7.051644789 | 1.142390656  | 4.25E-08    | 5.08E-06    |
| GRM1      | 7.684828344 | 6.485349093 | -1.199479252 | 0.007724375 | 0.019082698 |
| GSTA1     | 14.51247782 | 13.32298679 | -1.18949103  | 0.000913862 | 0.003666212 |
| GSTA2     | 13.2690591  | 11.46722837 | -1.80183073  | 0.001994725 | 0.006703936 |
| GSTA7P    | 7.165503289 | 5.341712726 | -1.823790563 | 0.006820434 | 0.01737225  |
| GSTP1     | 12.67377556 | 13.7204965  | 1.046720941  | 9.56E-07    | 2.89E-05    |
| GUCY1A2   | 10.33692642 | 11.35564552 | 1.018719096  | 0.00038469  | 0.001915198 |
| GUCY2EP   | 7.344497333 | 5.115801378 | -2.228695956 | 0.000178961 | 0.001075178 |
| GXYLT2    | 7.062618    | 8.256341048 | 1.193723048  | 4.08E-06    | 7.53E-05    |
| GYPC      | 9.695340878 | 10.80419474 | 1.108853859  | 6.37E-07    | 2.28E-05    |
| GZMA      | 5.842460556 | 7.240438685 | 1.39797813   | 0.001473392 | 0.00531078  |
| GZMB      | 5.144724222 | 6.331666026 | 1.186941804  | 0.021539551 | 0.043500221 |
| GZMK      | 5.204025656 | 7.026237844 | 1.822212189  | 0.000178961 | 0.001075178 |
| GZMM      | 4.611090756 | 6.2062222   | 1.595131444  | 2.55E-07    | 1.37E-05    |
| HAPLN3    | 6.661574911 | 7.761758981 | 1.10018407   | 0.019372344 | 0.039844    |
| HAPLN4    | 6.642388844 | 5.449760456 | -1.192628389 | 0.01365766  | 0.030533275 |
| HAS2      | 4.475547344 | 6.593236789 | 2.117689444  | 7.63E-06    | 0.000114982 |
| HAVCR1    | 9.976967978 | 11.25319034 | 1.276222359  | 0.004630835 | 0.012878433 |
| HCAR2     | 7.985172922 | 6.830623274 | -1.154549648 | 4.08E-06    | 7.53E-05    |
| HCG18     | 8.104444211 | 6.611988837 | -1.492455374 | 0.023905264 | 0.047276086 |
| HCK       | 8.193897767 | 9.357205404 | 1.163307637  | 0.005281184 | 0.014283284 |
| HCN2      | 7.5466575   | 6.244160519 | -1.302496981 | 7.95E-05    | 0.000599746 |
| HCRTR2    | 4.926132    | 2.904153233 | -2.021978767 | 0.011698562 | 0.026827784 |
| HCST      | 6.306627222 | 7.655652507 | 1.349025285  | 0.000549885 | 0.002497649 |
| HEATR9    | 5.757567578 | 7.094697111 | 1.337129533  | 9.83E-06    | 0.00013953  |
| HELT      | 5.810270922 | 3.840420307 | -1.969850615 | 0.001260525 | 0.00468919  |
| HEPACAM2  | 9.533012944 | 8.493633441 | -1.039379504 | 1.36E-05    | 0.000170337 |
| HES1      | 11.43693088 | 10.21219302 | -1.224737859 | 0.000118628 | 0.000798045 |
| HHIPL1    | 7.120840289 | 8.194091367 | 1.073251078  | 3.11E-05    | 0.000305214 |
| HIST1H1B  | 5.901906167 | 7.492505952 | 1.590599785  | 0.000460787 | 0.00218016  |
| HIST1H1D  | 7.587367611 | 9.071103493 | 1.483735881  | 6.14E-05    | 0.000493555 |
| HIST1H2AG | 5.677210178 | 7.277066333 | 1.599856156  | 7.69E-05    | 0.000583998 |
| HIST1H2AH | 5.0163432   | 6.626561426 | 1.610218226  | 0.000460787 | 0.00218016  |
| HIST1H2AI | 4.403323444 | 5.916235911 | 1.512912467  | 0.000460787 | 0.00218016  |
| HIST1H2AM | 5.733523856 | 7.196476841 | 1.462952985  | 0.001716851 | 0.005987476 |
| HIST1H2BH | 6.246681011 | 7.781866756 | 1.535185744  | 3.83E-05    | 0.000352659 |
| HIST1H2BI | 6.1172624   | 7.35218367  | 1.23492127   | 0.000208615 | 0.001239939 |
| HIST1H2BK | 8.674199678 | 9.814524919 | 1.140325241  | 2.32E-05    | 0.000244525 |
| HIST1H2BO | 4.822554244 | 6.087526456 | 1.264972211  | 0.012434026 | 0.027890332 |
| HIST1H3A  | 7.343437444 | 8.594453841 | 1.251016396  | 4.25E-08    | 5.08E-06    |
| HIST1H3B  | 6.846793178 | 8.119004759 | 1.272211581  | 0.002310776 | 0.007501587 |

|          |             |             |              |             |             |
|----------|-------------|-------------|--------------|-------------|-------------|
| HIST1H3D | 8.135320989 | 9.149997522 | 1.014676533  | 2.32E-05    | 0.000244525 |
| HIST1H3E | 6.150277522 | 7.154637007 | 1.004359485  | 1.02E-05    | 0.00013953  |
| HIST1H3F | 5.987894889 | 7.347348244 | 1.359453356  | 0.000264745 | 0.001432524 |
| HIST1H3G | 4.491739622 | 6.087181167 | 1.595441544  | 0.001260525 | 0.00468919  |
| HIST1H3H | 6.612416278 | 7.69744687  | 1.085030593  | 0.001260525 | 0.00468919  |
| HIST1H3I | 5.236011122 | 7.192214659 | 1.956203537  | 0.000167785 | 0.001056392 |
| HIST1H3J | 3.382676378 | 4.940356548 | 1.55768017   | 0.008728547 | 0.021002819 |
| HIST1H4F | 6.589314011 | 8.049848537 | 1.460534526  | 4.08E-06    | 7.53E-05    |
| HIST1H4I | 6.026769844 | 7.217466159 | 1.190696315  | 0.000118628 | 0.000798045 |
| HIST1H4J | 4.563217722 | 5.635297393 | 1.07207967   | 0.012434026 | 0.027890332 |
| HIST1H4L | 3.681871789 | 6.186013493 | 2.504141704  | 2.93E-06    | 6.06E-05    |
| HIST2H3D | 5.305844667 | 6.943233559 | 1.637388893  | 5.85E-05    | 0.000493555 |
| HLA-DOA  | 4.971420156 | 6.251374474 | 1.279954319  | 0.019372344 | 0.039844    |
| HMGN5    | 8.594608456 | 6.273648115 | -2.320960341 | 4.04E-07    | 1.75E-05    |
| HOPX     | 6.426232978 | 8.267278067 | 1.841045089  | 0.000264745 | 0.001432524 |
| HPGD     | 10.9346002  | 9.295798411 | -1.638801789 | 8.50E-08    | 7.43E-06    |
| HRASLS5  | 7.665499789 | 6.25011753  | -1.415382259 | 0.00034297  | 0.001771385 |
| HRG      | 10.78505848 | 8.874460852 | -1.910597626 | 3.00E-05    | 0.000295866 |
| HS3ST1   | 7.437421422 | 8.482221811 | 1.044800389  | 0.004050528 | 0.011607841 |
| HS6ST2   | 10.1478326  | 9.066759985 | -1.081072615 | 0.000118628 | 0.000798045 |
| HSD11B2  | 14.42099492 | 13.34632314 | -1.074671785 | 7.63E-06    | 0.000114982 |
| HSH2D    | 7.256298756 | 8.465785696 | 1.209486941  | 0.008728547 | 0.021002819 |
| HSPA1B   | 5.971756    | 3.255655007 | -2.716100993 | 2.65E-05    | 0.000276475 |
| HSPA7    | 7.833877233 | 8.93295077  | 1.099073537  | 0.004630835 | 0.012878433 |
| HSPE1    | 9.0124573   | 7.937048111 | -1.075409189 | 4.08E-06    | 7.53E-05    |
| HTR7     | 4.427469767 | 5.583210133 | 1.155740367  | 0.003534166 | 0.01039411  |
| ICAM4    | 6.291775533 | 5.151474122 | -1.140301411 | 0.000144878 | 0.000925394 |
| IER2     | 12.51573411 | 11.42363653 | -1.092097585 | 6.37E-07    | 2.28E-05    |
| IFI27L2  | 7.5006654   | 8.677575219 | 1.176909819  | 4.08E-06    | 7.53E-05    |
| IFIT1B   | 6.816322244 | 5.519014741 | -1.297307504 | 0.000774288 | 0.003234177 |
| IFITM1   | 10.51558316 | 11.57150383 | 1.055920674  | 4.87E-05    | 0.000416496 |
| IGDCC4   | 6.865206011 | 8.285338904 | 1.420132893  | 0.00290477  | 0.009088973 |
| IGF2     | 7.704144211 | 6.099119893 | -1.605024319 | 0.002669612 | 0.008400777 |
| IGFBP1   | 5.722613111 | 3.686870204 | -2.035742907 | 0.000885052 | 0.003666212 |
| IGFBP6   | 8.572252356 | 9.709146774 | 1.136894419  | 0.000549885 | 0.002497649 |
| IGFLR1   | 7.759297667 | 8.799118307 | 1.039820641  | 0.000178961 | 0.001075178 |
| IGLL5    | 9.190303522 | 12.05447232 | 2.864168796  | 0.002669612 | 0.008400777 |
| IGSF10   | 6.2835074   | 7.359568048 | 1.076060648  | 1.78E-05    | 0.000205405 |
| IHH      | 9.348508222 | 7.955359393 | -1.39314883  | 1.76E-05    | 0.000205405 |
| IKBKE    | 8.625193633 | 9.669439874 | 1.044246241  | 2.32E-05    | 0.000244525 |
| IKZF1    | 8.664380356 | 10.30093827 | 1.636557919  | 0.001716851 | 0.005987476 |
| IKZF3    | 8.310762133 | 10.31327389 | 2.002511756  | 0.001075106 | 0.004146384 |
| IL10RA   | 9.869496944 | 11.26793137 | 1.39843443   | 0.000549885 | 0.002497649 |
| IL12RB1  | 6.754756    | 7.967345633 | 1.212589633  | 0.000653663 | 0.002845514 |



|            |             |             |              |             |             |
|------------|-------------|-------------|--------------|-------------|-------------|
| IL13RA2    | 6.526247344 | 5.243412107 | -1.282835237 | 0.004630835 | 0.012878433 |
| IL16       | 9.562075456 | 10.82726714 | 1.265191689  | 0.000460787 | 0.00218016  |
| IL1RL1     | 11.50217262 | 10.19232751 | -1.309845115 | 0.000319768 | 0.001658505 |
| IL27RA     | 8.054032411 | 9.056405622 | 1.002373211  | 0.001075106 | 0.004146384 |
| IL2RA      | 5.821506556 | 7.014955533 | 1.193448978  | 0.003534166 | 0.01039411  |
| IL2RB      | 7.231240511 | 8.793472141 | 1.56223163   | 0.006008756 | 0.015730247 |
| IL2RG      | 7.438594678 | 8.968199663 | 1.529604985  | 0.004050528 | 0.011607841 |
| IL34       | 7.634745944 | 8.739360707 | 1.104614763  | 0.000264745 | 0.001432524 |
| IL7R       | 8.005097556 | 9.712322563 | 1.707225007  | 0.013932678 | 0.030533275 |
| INHBA      | 7.682370356 | 9.061248993 | 1.378878637  | 0.00307561  | 0.009346062 |
| INPP5J     | 11.77754783 | 10.72202914 | -1.055518693 | 3.00E-05    | 0.000295866 |
| INSC       | 6.448646967 | 5.433622326 | -1.015024641 | 0.011073759 | 0.025492733 |
| INSRR      | 9.863327644 | 8.7368474   | -1.126480244 | 0.00307561  | 0.009346062 |
| IP6K3      | 9.861904844 | 8.239906215 | -1.62199863  | 7.69E-05    | 0.000583998 |
| IQSEC3     | 11.12319509 | 9.964344007 | -1.158851081 | 0.001473392 | 0.00531078  |
| IRF4       | 6.578062144 | 9.197582374 | 2.61952023   | 0.000549885 | 0.002497649 |
| IRF8       | 9.089637411 | 10.32911974 | 1.23948233   | 0.007724375 | 0.019082698 |
| IRX6       | 4.7262117   | 6.762852378 | 2.036640678  | 1.42E-06    | 3.74E-05    |
| ISLR       | 9.651357611 | 10.91200326 | 1.260645652  | 1.02E-05    | 0.00013953  |
| ISLR2      | 4.455583256 | 6.06450277  | 1.608919515  | 0.000146054 | 0.000925394 |
| ITGAD      | 3.658086578 | 5.336570237 | 1.678483659  | 0.003534166 | 0.01039411  |
| ITGAL      | 9.373938411 | 10.80234952 | 1.428411107  | 0.004630835 | 0.012878433 |
| ITGAM      | 8.908995067 | 9.966952278 | 1.057957211  | 0.005281184 | 0.014283284 |
| ITGB2-AS1  | 6.392271078 | 7.673980681 | 1.281709604  | 0.004630835 | 0.012878433 |
| ITGB6      | 10.09284272 | 11.63464257 | 1.541799844  | 0.004050528 | 0.011607841 |
| ITGBL1     | 6.973616644 | 8.705353467 | 1.731736822  | 0.000653663 | 0.002845514 |
| ITK        | 7.050242867 | 8.378680907 | 1.328438041  | 0.017390195 | 0.036515989 |
| ITM2C      | 12.4192271  | 13.4324609  | 1.013233804  | 1.78E-05    | 0.000205405 |
| ITPRIPL1   | 4.618359078 | 6.226940715 | 1.608581637  | 2.55E-07    | 1.37E-05    |
| IZUMO1     | 6.2303191   | 5.175710152 | -1.054608948 | 0.000549885 | 0.002497649 |
| JAK3       | 9.377456744 | 10.76188571 | 1.38442897   | 0.00307561  | 0.009346062 |
| JAKMIP1    | 3.935714667 | 5.269359993 | 1.333645326  | 0.004050528 | 0.011607841 |
| JAML       | 7.760239233 | 9.533717385 | 1.773478152  | 0.000460787 | 0.00218016  |
| JUN        | 13.5619904  | 11.55179985 | -2.010190552 | 9.56E-07    | 2.89E-05    |
| JUNB       | 12.89756304 | 10.90323551 | -1.99432753  | 2.06E-06    | 4.71E-05    |
| KCNA3      | 7.164342833 | 8.809273022 | 1.644930189  | 0.002669612 | 0.008400777 |
| KCNG3      | 6.806567811 | 5.302605819 | -1.503961993 | 7.63E-06    | 0.000114982 |
| KCNH6      | 11.73207063 | 10.70145711 | -1.030613519 | 0.012434026 | 0.027890332 |
| KCNH7      | 6.3880452   | 5.345275789 | -1.042769411 | 0.001075106 | 0.004146384 |
| KCNIP4-IT1 | 5.828317644 | 4.599318911 | -1.228998733 | 0.003534166 | 0.01039411  |
| KCNJ8      | 8.612587978 | 9.77044453  | 1.157856552  | 2.93E-06    | 6.06E-05    |
| KCNMB2-AS1 | 6.637319144 | 5.595008837 | -1.042310307 | 9.58E-05    | 0.000677876 |
| KCNN4      | 5.620541322 | 6.8613547   | 1.240813378  | 0.00307561  | 0.009346062 |
| KCNS1      | 4.628405456 | 6.255195293 | 1.626789837  | 1.42E-06    | 3.74E-05    |

|             |             |             |              |             |             |
|-------------|-------------|-------------|--------------|-------------|-------------|
| KCNV1       | 3.076023678 | 4.488022685 | 1.411999007  | 0.019372344 | 0.039844    |
| KIF20A      | 6.126749667 | 7.255543815 | 1.128794148  | 2.55E-07    | 1.37E-05    |
| KIF21B      | 8.536676356 | 9.880723004 | 1.344046648  | 0.000319768 | 0.001658505 |
| KIRREL2     | 6.651475289 | 5.129953326 | -1.521521963 | 1.36E-05    | 0.000170337 |
| KL          | 14.84522018 | 13.74927224 | -1.095947933 | 6.82E-05    | 0.000543521 |
| KLHL3       | 12.46404074 | 11.25977244 | -1.204268307 | 2.32E-05    | 0.000244525 |
| KLK1        | 10.5978542  | 7.4528399   | -3.1450143   | 0.000913862 | 0.003666212 |
| KLK7        | 8.717742867 | 7.192844796 | -1.52489807  | 0.00038469  | 0.001915198 |
| KLRB1       | 5.444299878 | 6.548657022 | 1.104357144  | 0.004130317 | 0.011825913 |
| KLRG2       | 6.332669822 | 7.353098881 | 1.020429059  | 0.001716851 | 0.005987476 |
| KMO         | 11.39299529 | 10.20197744 | -1.191017844 | 9.58E-05    | 0.000677876 |
| KNG1        | 14.38503017 | 13.12473438 | -1.260295789 | 7.63E-06    | 0.000114982 |
| KRT80       | 7.378743922 | 8.497234574 | 1.118490652  | 0.021539551 | 0.043500221 |
| KRTAP5-8    | 7.310777111 | 5.641079744 | -1.669697367 | 1.78E-05    | 0.000205405 |
| L3MBTL4-AS1 | 8.193716644 | 6.779060919 | -1.414655726 | 9.56E-07    | 2.89E-05    |
| LAIR1       | 8.509067133 | 9.949334837 | 1.440267704  | 0.000319768 | 0.001658505 |
| LAMA4       | 10.19098391 | 11.27956043 | 1.088576515  | 1.42E-06    | 3.74E-05    |
| LAMC2       | 9.0585017   | 10.55760217 | 1.499100474  | 0.001473392 | 0.00531078  |
| LAMP5       | 5.346144644 | 6.558091256 | 1.211946611  | 0.002669612 | 0.008400777 |
| LAPTM5      | 10.23700471 | 11.44753983 | 1.210535122  | 0.023905264 | 0.047276086 |
| LAT2        | 7.857363078 | 9.063352726 | 1.205989648  | 0.000774288 | 0.003234177 |
| LAX1        | 5.705931344 | 7.684256896 | 1.978325552  | 0.001473392 | 0.00531078  |
| LCK         | 6.828078844 | 8.741381311 | 1.913302467  | 0.001075106 | 0.004146384 |
| LCN2        | 5.027271033 | 7.077210444 | 2.049939411  | 0.001075106 | 0.004146384 |
| LCNL1       | 6.581616244 | 5.508093626 | -1.073522619 | 0.001994725 | 0.006703936 |
| LCP2        | 9.017351367 | 10.03667225 | 1.019320885  | 0.005281184 | 0.014283284 |
| LGALS1      | 9.8313931   | 11.0041796  | 1.172786504  | 5.63E-06    | 9.22E-05    |
| LGSN        | 7.983434467 | 6.554796963 | -1.428637504 | 0.001075106 | 0.004146384 |
| LHFPL3      | 7.783698878 | 6.717686652 | -1.066012226 | 0.000460787 | 0.00218016  |
| LILRA2      | 5.887521533 | 7.101001411 | 1.213479878  | 6.14E-05    | 0.000493555 |
| LILRA4      | 3.482655278 | 5.872570867 | 2.389915589  | 0.003534166 | 0.01039411  |
| LILRB1      | 7.447167711 | 8.668364104 | 1.221196393  | 0.001260525 | 0.00468919  |
| LILRB5      | 7.967326456 | 9.050719926 | 1.08339347   | 0.000653663 | 0.002845514 |
| LIMD2       | 8.746279067 | 10.27978916 | 1.533510089  | 3.83E-05    | 0.000352659 |
| LINC00092   | 5.4315482   | 6.44769487  | 1.01614667   | 2.55E-07    | 1.37E-05    |
| LINC00113   | 6.313297422 | 4.916619019 | -1.396678404 | 0.000774288 | 0.003234177 |
| LINC00323   | 5.864364467 | 4.109627063 | -1.754737404 | 0.000178961 | 0.001075178 |
| LINC00402   | 2.243354267 | 4.521808322 | 2.278454056  | 0.006858785 | 0.017406247 |
| LINC00426   | 4.490330589 | 5.634085593 | 1.143755004  | 0.000124815 | 0.00083595  |
| LINC00473   | 9.105863211 | 7.291918607 | -1.813944604 | 0.00038469  | 0.001915198 |
| LINC00482   | 8.483624122 | 7.060402859 | -1.423221263 | 0.000549885 | 0.002497649 |
| LINC00484   | 6.860399833 | 5.400239774 | -1.460160059 | 5.63E-06    | 9.22E-05    |
| LINC00540   | 5.803600678 | 4.485515604 | -1.318085074 | 0.015581059 | 0.033436314 |
| LINC00551   | 7.162002111 | 6.1244161   | -1.037586011 | 0.004050528 | 0.011607841 |

|              |             |             |              |             |             |
|--------------|-------------|-------------|--------------|-------------|-------------|
| LINC00599    | 6.765253278 | 5.680360015 | -1.084893263 | 0.001994725 | 0.006703936 |
| LINC00639    | 4.915019389 | 6.37886323  | 1.463843841  | 7.69E-05    | 0.000583998 |
| LINC00645    | 9.341808933 | 7.940913544 | -1.400895389 | 2.93E-06    | 6.06E-05    |
| LINC00839    | 9.643823956 | 8.43507473  | -1.208749226 | 0.001260525 | 0.00468919  |
| LINC00853    | 7.821437844 | 6.6235291   | -1.197908744 | 0.006820434 | 0.01737225  |
| LINC00861    | 6.444024156 | 7.557394011 | 1.113369856  | 0.015581059 | 0.033436314 |
| LINC00871    | 6.710834733 | 5.352663993 | -1.358170741 | 0.000549885 | 0.002497649 |
| LINC00924    | 7.763807189 | 8.812339852 | 1.048532663  | 7.69E-05    | 0.000583998 |
| LINC00964    | 6.741983622 | 5.007879463 | -1.734104159 | 0.000634817 | 0.002845514 |
| LINC00970    | 6.9744178   | 5.644182381 | -1.330235419 | 0.000319768 | 0.001658505 |
| LINC01018    | 6.358618878 | 5.231318804 | -1.127300074 | 0.002310776 | 0.007501587 |
| LINC01055    | 8.940982578 | 7.520900352 | -1.420082226 | 0.001260525 | 0.00468919  |
| LINC01060    | 8.794426744 | 7.400945226 | -1.393481519 | 0.001716851 | 0.005987476 |
| LINC01108    | 7.084230933 | 5.609830796 | -1.474400137 | 9.58E-05    | 0.000677876 |
| LINC01187    | 11.3106811  | 10.0556082  | -1.255072904 | 7.63E-06    | 0.000114982 |
| LINC01215    | 3.125982589 | 4.526046859 | 1.40006427   | 0.021539551 | 0.043500221 |
| LINC01230    | 7.864800011 | 5.985229207 | -1.879570804 | 0.000118628 | 0.000798045 |
| LINC01279    | 8.177512844 | 9.732021648 | 1.554508804  | 7.63E-06    | 0.000114982 |
| LINC01342    | 8.9026255   | 7.818222589 | -1.084402911 | 0.001260525 | 0.00468919  |
| LINC01349    | 8.3361484   | 7.29430893  | -1.04183947  | 0.00307561  | 0.009346062 |
| LINC01426    | 2.713924189 | 5.84455827  | 3.130634081  | 4.08E-06    | 7.53E-05    |
| LINC01450    | 6.537150111 | 5.241057048 | -1.296093063 | 0.000319768 | 0.001658505 |
| LINC01485    | 7.060602444 | 5.317232796 | -1.743369648 | 1.36E-05    | 0.000170337 |
| LINC01539    | 6.163669922 | 4.731281122 | -1.4323888   | 0.023905264 | 0.047276086 |
| LINC01554    | 8.408309422 | 7.101036474 | -1.307272948 | 0.005281184 | 0.014283284 |
| LINC01612    | 7.312157033 | 6.152985074 | -1.159171959 | 1.36E-05    | 0.000170337 |
| LINC01847    | 6.755856078 | 4.850218348 | -1.90563773  | 0.001716851 | 0.005987476 |
| LINC02139    | 7.793926811 | 6.7430946   | -1.050832211 | 0.002669612 | 0.008400777 |
| LINGO3       | 5.121603578 | 6.15123293  | 1.029629352  | 0.015581059 | 0.033436314 |
| LIX1         | 6.4993884   | 8.063195448 | 1.563807048  | 0.000452501 | 0.00218016  |
| LMOD2        | 4.950852433 | 3.934503311 | -1.016349122 | 0.012964933 | 0.029054413 |
| LMX1B        | 10.09130592 | 8.50280463  | -1.588501293 | 4.08E-06    | 7.53E-05    |
| LOC100129316 | 8.655831133 | 7.135375663 | -1.52045547  | 5.63E-06    | 9.22E-05    |
| LOC100129697 | 4.3457175   | 5.9713164   | 1.6255989    | 9.58E-05    | 0.000677876 |
| LOC100130691 | 12.17461897 | 11.04522534 | -1.129393626 | 0.000460787 | 0.00218016  |
| LOC100506585 | 5.635146122 | 6.700887504 | 1.065741381  | 0.002669612 | 0.008400777 |
| LOC100507387 | 6.712407522 | 5.652120363 | -1.060287159 | 0.000774288 | 0.003234177 |
| LOC100507537 | 6.846638811 | 4.764433741 | -2.08220507  | 0.010543297 | 0.024773807 |
| LOC100507616 | 2.7854689   | 4.736529285 | 1.951060385  | 0.002310776 | 0.007501587 |
| LOC100507657 | 6.510971789 | 5.163123393 | -1.347848396 | 0.001075106 | 0.004146384 |
| LOC100996286 | 2.690114633 | 4.234085707 | 1.543971074  | 0.017390195 | 0.036515989 |
| LOC101060553 | 7.415635922 | 6.087188107 | -1.328447815 | 2.06E-06    | 4.71E-05    |
| LOC101926962 | 8.1670487   | 6.537883537 | -1.629165163 | 2.12E-08    | 4.42E-06    |
| LOC101926964 | 3.9601154   | 5.045730667 | 1.085615267  | 0.008524606 | 0.02093045  |

|              |             |             |              |             |             |
|--------------|-------------|-------------|--------------|-------------|-------------|
| LOC101927136 | 7.641314267 | 5.543619707 | -2.097694559 | 0.006820434 | 0.01737225  |
| LOC101927318 | 8.600577411 | 7.359487952 | -1.241089459 | 0.000653663 | 0.002845514 |
| LOC101927402 | 7.051463978 | 5.825493156 | -1.225970822 | 0.000118628 | 0.000798045 |
| LOC101927472 | 7.615043478 | 5.908664893 | -1.706378585 | 9.56E-07    | 2.89E-05    |
| LOC101927557 | 7.186999578 | 6.133063837 | -1.053935741 | 1.49E-07    | 9.92E-06    |
| LOC101927751 | 6.158721711 | 7.580801081 | 1.42207937   | 5.63E-06    | 9.22E-05    |
| LOC101927854 | 7.084746244 | 5.856464963 | -1.228281281 | 9.26E-05    | 0.000677876 |
| LOC101928596 | 7.6615855   | 5.683641759 | -1.977943741 | 0.001075106 | 0.004146384 |
| LOC101928820 | 10.192808   | 8.773350807 | -1.419457193 | 0.001716851 | 0.005987476 |
| LOC101928911 | 7.372567889 | 6.108028404 | -1.264539485 | 0.001994725 | 0.006703936 |
| LOC101929420 | 6.539578878 | 5.070975752 | -1.468603126 | 0.001716851 | 0.005987476 |
| LOC102723886 | 7.956724056 | 6.538079211 | -1.418644844 | 0.002310776 | 0.007501587 |
| LOC102724652 | 8.966874989 | 7.805114437 | -1.161760552 | 0.017390195 | 0.036515989 |
| LOC102724890 | 6.241977178 | 5.237667    | -1.004310178 | 0.015581059 | 0.033436314 |
| LOC105372833 | 6.507587256 | 4.968944122 | -1.538643133 | 0.003082665 | 0.009346062 |
| LOC105375115 | 8.268191689 | 6.342370793 | -1.925820896 | 0.023905264 | 0.047276086 |
| LOC105375787 | 6.457391067 | 4.960507233 | -1.496883833 | 2.12E-08    | 4.42E-06    |
| LOC200772    | 6.845625322 | 5.235441107 | -1.610184215 | 0.000549885 | 0.002497649 |
| LOC221946    | 6.517234778 | 4.629300367 | -1.887934411 | 7.95E-05    | 0.000599746 |
| LOC284454    | 10.16698557 | 9.0287994   | -1.138186167 | 7.69E-05    | 0.000583998 |
| LOC574538    | 9.0488901   | 7.931692048 | -1.117198052 | 0.011073759 | 0.025492733 |
| LOC643623    | 6.248417056 | 4.592325396 | -1.656091659 | 0.000319768 | 0.001658505 |
| LOC644794    | 9.5647152   | 8.27300453  | -1.29171067  | 4.04E-07    | 1.75E-05    |
| LOC728040    | 10.04525752 | 8.507608693 | -1.53764883  | 0.006820434 | 0.01737225  |
| LOC729683    | 6.909448756 | 8.046594607 | 1.137145852  | 3.00E-05    | 0.000295866 |
| LOXL1        | 9.443026844 | 10.60134436 | 1.158317511  | 1.02E-05    | 0.00013953  |
| LPA          | 8.832260067 | 7.430347652 | -1.401912415 | 0.000774288 | 0.003234177 |
| LPAL2        | 5.3865996   | 6.395469785 | 1.008870185  | 7.69E-05    | 0.000583998 |
| LPAR1        | 8.893125444 | 10.05790606 | 1.164780615  | 3.00E-05    | 0.000295866 |
| LPL          | 10.6567801  | 9.579648293 | -1.077131807 | 0.001994725 | 0.006703936 |
| LRG1         | 6.323207411 | 7.504288256 | 1.181080844  | 0.007724375 | 0.019082698 |
| LRRC19       | 11.40479649 | 10.3845767  | -1.020219789 | 6.37E-07    | 2.28E-05    |
| LRRC39       | 6.008698733 | 4.970595259 | -1.038103474 | 0.000775871 | 0.003234177 |
| LRRC9        | 6.628050089 | 4.9902294   | -1.637820689 | 1.78E-05    | 0.000205405 |
| LRRK1        | 9.8683632   | 11.06789247 | 1.199529267  | 0.000319768 | 0.001658505 |
| LRRN4        | 8.783723133 | 10.08036281 | 1.296639681  | 0.000146054 | 0.000925394 |
| LSMEM1       | 8.263778933 | 6.981308019 | -1.282470915 | 2.65E-05    | 0.000276475 |
| LSP1         | 8.6931975   | 10.2701885  | 1.576991004  | 0.003534166 | 0.01039411  |
| LTF          | 9.807870989 | 12.38053732 | 2.57266633   | 0.002669612 | 0.008400777 |
| LUCAT1       | 4.352732167 | 3.07174763  | -1.280984537 | 0.007724375 | 0.019082698 |
| LUM          | 11.32965716 | 12.64296499 | 1.31330783   | 0.000218157 | 0.001239939 |
| LY9          | 6.0991614   | 7.622139    | 1.5229776    | 0.006008756 | 0.015730247 |
| LYZ          | 9.0439169   | 10.6917213  | 1.6478044    | 0.018446223 | 0.038571566 |
| M1AP         | 5.034672111 | 6.207729104 | 1.173056993  | 4.08E-06    | 7.53E-05    |

|           |             |             |              |             |             |
|-----------|-------------|-------------|--------------|-------------|-------------|
| MAFF      | 9.892788744 | 8.337637033 | -1.555151711 | 6.14E-05    | 0.000493555 |
| MAP1LC3C  | 3.020937156 | 4.809948048 | 1.789010893  | 0.000208615 | 0.001239939 |
| MAP4K1    | 7.226596178 | 8.501204196 | 1.274608019  | 0.012434026 | 0.027890332 |
| MAPT-IT1  | 8.364043722 | 7.110645944 | -1.253397778 | 0.001260525 | 0.00468919  |
| MARCKSL1  | 9.917571178 | 10.95289228 | 1.035321104  | 1.02E-05    | 0.00013953  |
| MCUB      | 6.445475378 | 7.487098096 | 1.041622719  | 0.00307561  | 0.009346062 |
| MDFI      | 6.300047978 | 7.82085297  | 1.520804993  | 6.37E-07    | 2.28E-05    |
| MDK       | 8.240987633 | 9.780890152 | 1.539902519  | 5.63E-06    | 9.22E-05    |
| MEAT6     | 4.890766844 | 3.4843182   | -1.406448644 | 0.006848016 | 0.017406247 |
| MEGF11    | 8.283088522 | 9.631962759 | 1.348874237  | 1.42E-06    | 3.74E-05    |
| MEI1      | 6.587132333 | 7.677990515 | 1.090858181  | 0.005808024 | 0.015628954 |
| MEIOC     | 6.273709989 | 5.158874504 | -1.114835485 | 0.000218157 | 0.001239939 |
| MEOX1     | 2.637159067 | 5.101692474 | 2.464533407  | 2.32E-05    | 0.000244525 |
| MFAP2     | 5.879099189 | 7.059215037 | 1.180115848  | 5.63E-06    | 9.22E-05    |
| MFAP4     | 9.881064744 | 11.21699285 | 1.335928104  | 3.00E-05    | 0.000295866 |
| MFAP5     | 3.481507467 | 5.749513544 | 2.268006078  | 0.017390195 | 0.036515989 |
| MGAM2     | 8.285330167 | 7.128945067 | -1.1563851   | 0.000460787 | 0.00218016  |
| MGAT5B    | 7.149251967 | 6.144024319 | -1.005227648 | 0.000913862 | 0.003666212 |
| MGC70870  | 7.648505678 | 8.767753004 | 1.119247326  | 0.001075106 | 0.004146384 |
| MGP       | 11.95944759 | 13.32042904 | 1.360981452  | 3.00E-05    | 0.000295866 |
| MIAT      | 8.783281433 | 9.85140157  | 1.068120137  | 0.000178961 | 0.001075178 |
| MICAL2    | 10.55413991 | 11.63774781 | 1.083607896  | 3.83E-05    | 0.000352659 |
| MIR142    | 3.6709055   | 5.6674827   | 1.9965772    | 0.000218157 | 0.001239939 |
| MIR1914   | 7.198793767 | 5.746314604 | -1.452479163 | 4.25E-08    | 5.08E-06    |
| MIR221    | 4.895203689 | 3.725415319 | -1.16978837  | 0.006855195 | 0.017406247 |
| MIR23A    | 6.184547411 | 4.539007722 | -1.645539689 | 0.000146054 | 0.000925394 |
| MIR27A    | 5.015684489 | 3.608757959 | -1.40692653  | 0.00549147  | 0.014809487 |
| MIR27B    | 6.072560311 | 7.546841574 | 1.474281263  | 2.12E-08    | 4.42E-06    |
| MIR3183   | 6.040768933 | 4.613452559 | -1.427316374 | 0.001260525 | 0.00468919  |
| MIR3189   | 7.663082611 | 4.306879604 | -3.356203007 | 2.93E-06    | 6.06E-05    |
| MIR31HG   | 5.484080189 | 6.739902578 | 1.255822389  | 6.14E-05    | 0.000493555 |
| MIR324    | 6.4728021   | 4.989198359 | -1.483603741 | 4.25E-08    | 5.08E-06    |
| MIR4265   | 6.226138222 | 5.1697641   | -1.056374122 | 0.000774288 | 0.003234177 |
| MIR4307HG | 8.090617811 | 6.935530693 | -1.155087119 | 0.000218157 | 0.001239939 |
| MIR4539   | 4.007198978 | 6.012309119 | 2.005110141  | 0.013932678 | 0.030533275 |
| MIR554    | 5.900832389 | 4.310237222 | -1.590595167 | 1.02E-05    | 0.00013953  |
| MIR5699   | 7.248995711 | 6.209104819 | -1.039890893 | 1.78E-05    | 0.000205405 |
| MIR647    | 7.273193189 | 6.10914293  | -1.164050259 | 2.06E-06    | 4.71E-05    |
| MIR6723   | 10.54754313 | 8.207993856 | -2.339549278 | 2.12E-08    | 4.42E-06    |
| MIR6863   | 7.098085322 | 4.842156748 | -2.255928574 | 0.000146054 | 0.000925394 |
| MIR6883   | 5.827613067 | 3.256337593 | -2.571275474 | 2.55E-07    | 1.37E-05    |
| MKI67     | 7.660808444 | 8.952535874 | 1.29172743   | 0.003534166 | 0.01039411  |
| MLXIPL    | 12.903567   | 11.65341106 | -1.250155944 | 4.04E-07    | 1.75E-05    |
| MME       | 15.48666417 | 14.12353631 | -1.363127859 | 5.84E-05    | 0.000493555 |

|            |             |             |              |             |             |
|------------|-------------|-------------|--------------|-------------|-------------|
| MMP1       | 2.1073291   | 3.717457989 | 1.610128889  | 0.012976585 | 0.029054413 |
| MMP2       | 10.99132128 | 12.08256837 | 1.091247089  | 5.63E-06    | 9.22E-05    |
| MMP7       | 10.02912907 | 11.89992095 | 1.870791881  | 0.007724375 | 0.019082698 |
| MMRN1      | 5.428951967 | 7.276439515 | 1.847487548  | 0.003534166 | 0.01039411  |
| MOXD1      | 9.2059759   | 11.01457635 | 1.808600452  | 1.36E-05    | 0.000170337 |
| MPEG1      | 10.26522774 | 11.51435543 | 1.249127689  | 0.004050528 | 0.011607841 |
| MRLN       | 6.805869289 | 5.093059815 | -1.712809474 | 0.004630835 | 0.012878433 |
| MRO        | 12.48661502 | 10.68498625 | -1.801628774 | 1.02E-05    | 0.00013953  |
| MROH2B     | 3.752119711 | 6.417083833 | 2.664964122  | 5.63E-06    | 9.22E-05    |
| MROH5      | 7.046862144 | 5.871990378 | -1.174871767 | 0.004050528 | 0.011607841 |
| MROH7      | 6.946875156 | 5.853921559 | -1.092953596 | 0.000146054 | 0.000925394 |
| MRPL23-AS1 | 7.996641522 | 6.475627541 | -1.521013981 | 4.87E-05    | 0.000416496 |
| MS4A1      | 5.714800711 | 7.652734926 | 1.937934215  | 0.006820434 | 0.01737225  |
| MS4A2      | 4.423681411 | 5.997013419 | 1.573332007  | 0.008728547 | 0.021002819 |
| MS4A4A     | 7.492394456 | 8.751373548 | 1.258979093  | 0.000218157 | 0.001239939 |
| MS4A6A     | 8.808894089 | 10.45416461 | 1.645270522  | 2.32E-05    | 0.000244525 |
| MSC        | 6.463716956 | 8.212503163 | 1.748786207  | 1.78E-05    | 0.000205405 |
| MSC-AS1    | 6.564160756 | 7.565535033 | 1.001374278  | 0.000460787 | 0.00218016  |
| MSMO1      | 10.53589957 | 9.508542167 | -1.0273574   | 4.25E-08    | 5.08E-06    |
| MTPP       | 10.81824132 | 9.550860011 | -1.267381311 | 1.36E-05    | 0.000170337 |
| MUC12      | 3.910853978 | 4.926797174 | 1.015943196  | 0.008728547 | 0.021002819 |
| MUC13      | 10.948943   | 8.863574619 | -2.085368381 | 0.002310776 | 0.007501587 |
| MUC5B      | 9.749913556 | 8.429665052 | -1.320248504 | 4.08E-06    | 7.53E-05    |
| MYBL2      | 4.654333667 | 6.189261222 | 1.534927556  | 0.006008756 | 0.015730247 |
| MYBPC2     | 3.663510244 | 5.938432889 | 2.274922644  | 0.000298025 | 0.001598018 |
| MYCL       | 7.004625611 | 8.293827407 | 1.289201796  | 2.93E-06    | 6.06E-05    |
| MYCN       | 9.499913989 | 8.485483189 | -1.0144308   | 0.021539551 | 0.043500221 |
| MYCNOS     | 6.1016415   | 4.495264115 | -1.606377385 | 0.012325729 | 0.027890332 |
| MYH7       | 2.389846333 | 4.824933859 | 2.435087526  | 0.00257514  | 0.008329689 |
| MYO1F      | 9.767246622 | 10.78854102 | 1.0212944    | 0.021539551 | 0.043500221 |
| MYO1G      | 7.876588711 | 9.336575093 | 1.459986381  | 0.005281184 | 0.014283284 |
| MYO1H      | 6.122254389 | 7.248785211 | 1.126530822  | 4.25E-08    | 5.08E-06    |
| MZB1       | 6.473285578 | 8.765876581 | 2.292591004  | 0.002310776 | 0.007501587 |
| NAPSB      | 8.068731678 | 9.319127096 | 1.250395419  | 0.000146054 | 0.000925394 |
| NCF1       | 6.581036156 | 7.707906593 | 1.126870437  | 0.002669612 | 0.008400777 |
| NCF2       | 8.185226389 | 9.421454522 | 1.236228133  | 0.000594014 | 0.002682107 |
| NCF4       | 7.529953478 | 8.892332263 | 1.362378785  | 0.000178961 | 0.001075178 |
| NCKAP1L    | 9.206833189 | 10.61594098 | 1.409107789  | 0.001994725 | 0.006703936 |
| NCMAP      | 6.474821022 | 8.09053183  | 1.615710807  | 3.83E-05    | 0.000352659 |
| NDNF       | 12.30250103 | 10.10115154 | -2.201349493 | 1.49E-07    | 9.92E-06    |
| NELL1      | 10.16784506 | 8.803264126 | -1.36458093  | 0.002310776 | 0.007501587 |
| NFAM1      | 8.3829111   | 9.456413693 | 1.073502593  | 0.003534166 | 0.01039411  |
| NIPAL4     | 4.194206611 | 5.692905396 | 1.498698785  | 0.000394196 | 0.001952805 |
| NKG7       | 6.664551889 | 7.797199019 | 1.13264713   | 0.006008756 | 0.015730247 |

|           |             |             |              |             |             |
|-----------|-------------|-------------|--------------|-------------|-------------|
| NLRP2     | 6.323760367 | 7.801685896 | 1.47792553   | 0.013932678 | 0.030533275 |
| NMRAL2P   | 7.9904074   | 6.850582574 | -1.139824826 | 9.58E-05    | 0.000677876 |
| NNMT      | 8.313653989 | 10.30469348 | 1.991039493  | 0.001994725 | 0.006703936 |
| NOD2      | 6.655379622 | 7.867081089 | 1.211701467  | 0.006820434 | 0.01737225  |
| NPHS1     | 12.30849984 | 10.43174502 | -1.876754822 | 5.63E-06    | 9.22E-05    |
| NPHS2     | 12.42198218 | 11.10049302 | -1.321489159 | 0.00038469  | 0.001915198 |
| NPIPA1    | 7.353924967 | 6.156187419 | -1.197737548 | 0.000774288 | 0.003234177 |
| NPIPA5    | 6.725039778 | 5.698166211 | -1.026873567 | 0.005281184 | 0.014283284 |
| NPIPB3    | 9.663211267 | 8.631328252 | -1.031883015 | 0.000549885 | 0.002497649 |
| NPIPB5    | 8.087975622 | 6.570752026 | -1.517223596 | 1.78E-05    | 0.000205405 |
| NPTX1     | 6.455075811 | 4.670089952 | -1.784985859 | 0.000144878 | 0.000925394 |
| NROB2     | 8.766976533 | 6.937936074 | -1.829040459 | 2.55E-07    | 1.37E-05    |
| NR1D1     | 10.2945475  | 9.289466159 | -1.005081341 | 0.000118628 | 0.000798045 |
| NR4A1     | 14.51146072 | 9.740197444 | -4.771263278 | 2.12E-08    | 4.42E-06    |
| NR4A2     | 10.53636618 | 6.311474356 | -4.224891822 | 2.12E-08    | 4.42E-06    |
| NR4A3     | 10.83575342 | 7.579752552 | -3.25600087  | 4.25E-08    | 5.08E-06    |
| NRARP     | 9.345964378 | 8.226274174 | -1.119690204 | 4.08E-06    | 7.53E-05    |
| NRSN1     | 5.839759678 | 7.241248641 | 1.401488963  | 0.000452501 | 0.00218016  |
| NTM       | 5.808008878 | 7.796483226 | 1.988474348  | 0.000118628 | 0.000798045 |
| NTNG1     | 10.02292818 | 8.61557967  | -1.407348507 | 1.36E-05    | 0.000170337 |
| NTRK3-AS1 | 5.593720544 | 4.415066733 | -1.178653811 | 0.001303898 | 0.004832572 |
| NUGGC     | 10.68755092 | 9.463781837 | -1.223769085 | 0.001260525 | 0.00468919  |
| NXPH2     | 8.085505667 | 6.591356511 | -1.494149156 | 2.93E-06    | 6.06E-05    |
| OLFM1     | 6.694338533 | 7.724583193 | 1.030244659  | 9.58E-05    | 0.000677876 |
| OLFM2     | 6.697223    | 7.791849093 | 1.094626093  | 4.08E-06    | 7.53E-05    |
| OLFM3     | 4.508603167 | 3.495957893 | -1.012645274 | 0.00984202  | 0.023183842 |
| OLFML2B   | 7.965910411 | 8.998972522 | 1.033062111  | 0.002669612 | 0.008400777 |
| OLIG1     | 7.932730022 | 6.930759507 | -1.001970515 | 0.000653663 | 0.002845514 |
| OLIG2     | 6.638247256 | 5.059274952 | -1.578972304 | 4.87E-05    | 0.000416496 |
| OLR1      | 9.066639422 | 7.775621907 | -1.291017515 | 1.42E-06    | 3.74E-05    |
| OR2G6     | 7.158712767 | 5.462972559 | -1.695740207 | 0.007651151 | 0.019082698 |
| OR2T10    | 8.005900411 | 6.223879619 | -1.782020793 | 0.006008756 | 0.015730247 |
| OR2T11    | 8.327107122 | 6.616042548 | -1.711064574 | 0.00984202  | 0.023183842 |
| OR2T2     | 7.191394456 | 5.491715078 | -1.699679378 | 0.002669612 | 0.008400777 |
| OR2T3     | 6.161291878 | 4.159256333 | -2.002035544 | 0.000774288 | 0.003234177 |
| OR2T34    | 6.700857267 | 4.737011819 | -1.963845448 | 0.001994725 | 0.006703936 |
| OR2T35    | 6.612291444 | 4.768336156 | -1.843955289 | 0.003534166 | 0.01039411  |
| OSM       | 6.063540044 | 4.227463474 | -1.83607657  | 9.56E-07    | 2.89E-05    |
| OSR2      | 3.391346533 | 5.152179581 | 1.760833048  | 4.08E-06    | 7.53E-05    |
| OXGR1     | 7.489386067 | 6.208994978 | -1.280391089 | 0.000726099 | 0.003136112 |
| P2RX5     | 3.847647278 | 5.780260937 | 1.932613659  | 0.001473392 | 0.00531078  |
| P2RY10    | 5.512509811 | 6.857576756 | 1.345066944  | 0.007724375 | 0.019082698 |
| PADI4     | 3.778789067 | 2.639306037 | -1.13948303  | 0.008728547 | 0.021002819 |
| PAH       | 15.19118411 | 14.040988   | -1.150196111 | 0.000298025 | 0.001598018 |

|            |             |             |              |             |             |
|------------|-------------|-------------|--------------|-------------|-------------|
| PAMR1      | 7.315915033 | 8.489131593 | 1.173216559  | 0.002669612 | 0.008400777 |
| PAPPA2     | 11.69465301 | 12.87798076 | 1.183327752  | 0.001994725 | 0.006703936 |
| PARP15     | 6.692803322 | 7.831274241 | 1.138470919  | 0.017390195 | 0.036515989 |
| PARVG      | 8.1112182   | 9.500786996 | 1.389568796  | 0.003534166 | 0.01039411  |
| PAX5       | 4.344234489 | 7.238447259 | 2.89421277   | 0.00307561  | 0.009346062 |
| PCAT29     | 7.610441178 | 5.661010033 | -1.949431144 | 0.000394196 | 0.001952805 |
| PCDH15     | 10.09828183 | 8.486188933 | -1.6120929   | 0.000118628 | 0.000798045 |
| PCDH18     | 9.449647478 | 10.45076349 | 1.001116015  | 4.08E-06    | 7.53E-05    |
| PCK1       | 16.58915096 | 14.90414236 | -1.685008596 | 2.44E-05    | 0.000256584 |
| PCOLCE2    | 10.27981223 | 8.697904459 | -1.581907774 | 2.93E-06    | 6.06E-05    |
| PDGFRA     | 11.64985856 | 12.88227628 | 1.232417726  | 7.63E-06    | 0.000114982 |
| PDK4       | 12.2472966  | 10.14971447 | -2.097582126 | 9.56E-07    | 2.89E-05    |
| PER1       | 13.25594877 | 11.89683722 | -1.359111544 | 4.87E-05    | 0.000416496 |
| PHF21B     | 8.495980044 | 7.375986796 | -1.119993248 | 3.00E-05    | 0.000295866 |
| PHYHIP     | 9.141352833 | 8.035718622 | -1.105634211 | 0.000775871 | 0.003234177 |
| PIK3CD-AS1 | 4.950577422 | 6.656398115 | 1.705820693  | 0.000264745 | 0.001432524 |
| PIK3CG     | 8.6083594   | 9.774463567 | 1.166104167  | 0.00307561  | 0.009346062 |
| PIK3R5     | 8.005888444 | 9.384638037 | 1.378749593  | 0.003534166 | 0.01039411  |
| PIK3R6     | 5.940848344 | 7.362917196 | 1.422068852  | 0.006008756 | 0.015730247 |
| PLAC8      | 5.842697167 | 7.408232741 | 1.565535574  | 0.003534166 | 0.01039411  |
| PLCB2      | 9.369801356 | 10.79757799 | 1.427776633  | 0.000913862 | 0.003666212 |
| PLCE1-AS1  | 6.3251027   | 4.872527719 | -1.452574981 | 4.25E-08    | 5.08E-06    |
| PLCZ1      | 7.225539778 | 5.838560119 | -1.386979659 | 5.63E-06    | 9.22E-05    |
| PLD4       | 6.995863222 | 8.239130474 | 1.243267252  | 0.002310776 | 0.007501587 |
| PLEK       | 8.375038689 | 9.571687707 | 1.196649019  | 0.012434026 | 0.027890332 |
| PLEKHA4    | 9.464316511 | 10.5233485  | 1.059031993  | 0.000218157 | 0.001239939 |
| PLEKHD1    | 7.798466833 | 6.380505807 | -1.417961026 | 0.001473392 | 0.00531078  |
| PLG        | 15.33795342 | 14.1150882  | -1.222865222 | 0.002281511 | 0.007501587 |
| PLPP2      | 7.120391022 | 8.304893419 | 1.184502396  | 0.000549885 | 0.002497649 |
| PLPPR4     | 7.497680011 | 6.177941322 | -1.319738689 | 0.000264745 | 0.001432524 |
| PLXNA4     | 8.772554467 | 10.12262903 | 1.350074559  | 5.63E-06    | 9.22E-05    |
| PM20D1     | 10.70708858 | 9.184508756 | -1.522579822 | 0.002310776 | 0.007501587 |
| PNOC       | 3.632983733 | 5.553956881 | 1.920973148  | 9.26E-05    | 0.000677876 |
| PNPLA1     | 10.03769407 | 8.81164783  | -1.226046237 | 0.000118628 | 0.000798045 |
| PODN       | 7.375958167 | 8.9116851   | 1.535726933  | 9.58E-05    | 0.000677876 |
| POM121L1P  | 7.510037989 | 5.773410722 | -1.736627267 | 0.000178961 | 0.001075178 |
| POM121L9P  | 6.529254222 | 7.988890863 | 1.459636641  | 0.002310776 | 0.007501587 |
| POU2AF1    | 6.462090089 | 8.333375737 | 1.871285648  | 0.008728547 | 0.021002819 |
| POU2F2     | 7.684544178 | 8.801708352 | 1.117164174  | 0.008728547 | 0.021002819 |
| PPP1R1B    | 7.639830222 | 9.022998111 | 1.383167889  | 3.00E-05    | 0.000295866 |
| PPP2R2C    | 5.7752852   | 4.619529956 | -1.155755244 | 0.00984202  | 0.023183842 |
| PRDM8      | 5.928928589 | 7.189150819 | 1.26022223   | 4.87E-05    | 0.000416496 |
| PRKCB      | 8.036065289 | 9.532666759 | 1.49660147   | 0.004630835 | 0.012878433 |
| PRODH2     | 14.28835063 | 13.1369013  | -1.151449333 | 0.002280019 | 0.007501587 |



|         |             |             |              |             |             |
|---------|-------------|-------------|--------------|-------------|-------------|
| PROK2   | 3.093501278 | 1.649343093 | -1.444158185 | 0.005470359 | 0.014792421 |
| PROM1   | 10.78529232 | 11.96520708 | 1.179914759  | 0.002310776 | 0.007501587 |
| PROZ    | 10.8552619  | 9.271158604 | -1.584103296 | 0.000319768 | 0.001658505 |
| PRPH2   | 6.910872278 | 8.06239997  | 1.151527693  | 2.25E-05    | 0.000244525 |
| PRRX1   | 6.062715889 | 8.218390574 | 2.155674685  | 1.78E-05    | 0.000205405 |
| PRSS50  | 6.817075422 | 5.630252933 | -1.186822489 | 1.02E-05    | 0.00013953  |
| PSTPIP1 | 7.998397156 | 9.029912844 | 1.031515689  | 0.008728547 | 0.021002819 |
| PTAFR   | 8.574260256 | 9.695144441 | 1.120884185  | 0.008077315 | 0.019911607 |
| PTGDR   | 5.750777211 | 7.128807689 | 1.378030478  | 1.78E-05    | 0.000205405 |
| PTGER1  | 8.6724539   | 9.854023341 | 1.181569441  | 5.63E-06    | 9.22E-05    |
| PTGER3  | 12.28034569 | 10.85406478 | -1.426280907 | 2.12E-08    | 4.42E-06    |
| PTGFR   | 8.718853789 | 7.587347767 | -1.131506022 | 2.93E-06    | 6.06E-05    |
| PTGS2   | 8.814147022 | 7.585166585 | -1.228980437 | 2.93E-06    | 6.06E-05    |
| PTHLH   | 6.942002644 | 4.96692357  | -1.975079074 | 1.49E-07    | 9.92E-06    |
| PTPRCAP | 8.568988011 | 9.591332689 | 1.022344678  | 0.000653663 | 0.002845514 |
| PTPRO   | 12.47055391 | 11.07061233 | -1.399941578 | 5.63E-06    | 9.22E-05    |
| PTPRQ   | 10.82942792 | 9.015620778 | -1.813807144 | 7.63E-06    | 0.000114982 |
| PVALB   | 9.3414706   | 8.137036163 | -1.204434437 | 0.001994725 | 0.006703936 |
| PVT1    | 6.344289367 | 7.764779437 | 1.42049007   | 0.00055521  | 0.002516123 |
| PXDN    | 10.79746337 | 11.87672636 | 1.079262996  | 0.000549885 | 0.002497649 |
| PYCARD  | 6.260691867 | 7.740609033 | 1.479917167  | 2.06E-06    | 4.71E-05    |
| PYY     | 6.0848875   | 4.538994415 | -1.545893085 | 2.65E-05    | 0.000276475 |
| QPCT    | 6.904450489 | 8.000064111 | 1.095613622  | 0.002310776 | 0.007501587 |
| RAC2    | 8.260683722 | 9.754801533 | 1.494117811  | 0.007724375 | 0.019082698 |
| RAMP1   | 6.8608829   | 7.896791063 | 1.035908163  | 0.001473392 | 0.00531078  |
| RARRES1 | 7.725161522 | 9.211824548 | 1.486663026  | 3.00E-05    | 0.000295866 |
| RASAL3  | 8.234753611 | 9.523189819 | 1.288436207  | 0.003534166 | 0.01039411  |
| RASD1   | 10.92441891 | 9.554576767 | -1.369842144 | 0.002669612 | 0.008400777 |
| RASSF2  | 9.067948722 | 10.50923925 | 1.44129053   | 0.000549885 | 0.002497649 |
| RBM44   | 6.201040267 | 5.194795615 | -1.006244652 | 9.58E-05    | 0.000677876 |
| REG1A   | 5.520449578 | 8.030491085 | 2.510041507  | 0.00307561  | 0.009346062 |
| REG3G   | 2.598378611 | 4.827379048 | 2.229000437  | 0.008073241 | 0.019911607 |
| RELN    | 8.374708567 | 9.438419678 | 1.063711111  | 7.69E-05    | 0.000583998 |
| RET     | 7.380037344 | 8.76062683  | 1.380589485  | 4.04E-07    | 1.75E-05    |
| RGPD3   | 7.658155433 | 6.160444811 | -1.497710622 | 0.011073759 | 0.025492733 |
| RGS1    | 7.985177867 | 4.79158423  | -3.193593637 | 7.63E-06    | 0.000114982 |
| RGS16   | 9.567639122 | 8.221774493 | -1.34586463  | 6.37E-07    | 2.28E-05    |
| RGS19   | 7.596200544 | 8.886398752 | 1.290198207  | 1.02E-05    | 0.00013953  |
| RGS2    | 9.332407222 | 8.313614    | -1.018793222 | 1.02E-05    | 0.00013953  |
| RGS7    | 6.4958729   | 5.202027341 | -1.293845559 | 0.002283003 | 0.007501587 |
| RGS9BP  | 8.394957656 | 7.199706722 | -1.195250933 | 0.001716851 | 0.005987476 |
| RHCG    | 12.59045043 | 11.03578847 | -1.554661959 | 0.000218157 | 0.001239939 |
| RHOH    | 5.656285056 | 7.477902381 | 1.821617326  | 0.002310776 | 0.007501587 |
| RIMS2   | 5.869686444 | 7.069512526 | 1.199826081  | 0.001075106 | 0.004146384 |

|          |             |             |              |             |             |
|----------|-------------|-------------|--------------|-------------|-------------|
| RNASE6   | 7.259987733 | 8.554838604 | 1.29485087   | 0.000178961 | 0.001075178 |
| RNF112   | 6.001325289 | 7.19248573  | 1.191160441  | 4.25E-08    | 5.08E-06    |
| RNF144B  | 10.24428196 | 11.27728847 | 1.033006515  | 0.000319768 | 0.001658505 |
| RNF152   | 13.84647051 | 12.83003307 | -1.016437441 | 0.000298025 | 0.001598018 |
| RNF17    | 3.741887622 | 1.587461719 | -2.154425904 | 0.006840842 | 0.017406247 |
| RNF212B  | 10.32754642 | 9.199137056 | -1.128409367 | 0.001260525 | 0.00468919  |
| RNR1     | 12.14317372 | 9.572844411 | -2.570329311 | 1.36E-05    | 0.000170337 |
| RNR2     | 12.313323   | 9.903093915 | -2.410229085 | 5.63E-06    | 9.22E-05    |
| RPL32    | 13.04906073 | 14.07570024 | 1.026639504  | 2.12E-08    | 4.42E-06    |
| RPLP0    | 13.97245402 | 15.0122123  | 1.039758274  | 9.82E-06    | 0.00013953  |
| RPS19    | 12.35019007 | 13.39219987 | 1.042009804  | 2.55E-07    | 1.37E-05    |
| RPS2     | 13.35385662 | 14.47177124 | 1.117914615  | 1.49E-07    | 9.92E-06    |
| RPS3     | 13.37928607 | 14.39253249 | 1.013246422  | 2.12E-08    | 4.42E-06    |
| RPS8     | 13.28560723 | 14.38750812 | 1.101900889  | 9.83E-06    | 0.00013953  |
| RPSA     | 12.77974517 | 13.84424159 | 1.064496426  | 4.25E-08    | 5.08E-06    |
| RUBCNL   | 7.652184822 | 8.736875019 | 1.084690196  | 0.00307561  | 0.009346062 |
| RUNDC3B  | 8.720952678 | 7.679236459 | -1.041716219 | 2.06E-06    | 4.71E-05    |
| RUNX1    | 9.602830278 | 10.63412209 | 1.031291807  | 0.015581059 | 0.033436314 |
| RUNX3    | 7.484369422 | 8.739151481 | 1.254782059  | 0.007724375 | 0.019082698 |
| RYR1     | 8.717253778 | 9.723163367 | 1.005909589  | 0.000118628 | 0.000798045 |
| S100A4   | 8.423374022 | 9.754702511 | 1.331328489  | 9.56E-07    | 2.89E-05    |
| S100A6   | 12.09758807 | 13.19279556 | 1.095207496  | 5.63E-06    | 9.22E-05    |
| S100B    | 4.445677022 | 5.742514515 | 1.296837493  | 0.001994725 | 0.006703936 |
| S1PR4    | 5.825332956 | 7.368728593 | 1.543395637  | 0.000460787 | 0.00218016  |
| SAA1     | 4.030436011 | 6.543350459 | 2.512914448  | 0.001994725 | 0.006703936 |
| SALL3    | 10.20724604 | 8.506247781 | -1.700998263 | 2.32E-05    | 0.000244525 |
| SAMHD1   | 10.32349471 | 11.37064821 | 1.047153496  | 0.005281184 | 0.014283284 |
| SASH3    | 8.232074433 | 9.748174533 | 1.5161001    | 0.000118628 | 0.000798045 |
| SCARA3   | 8.506258744 | 9.586042922 | 1.079784178  | 0.001716851 | 0.005987476 |
| SCARA5   | 4.545284956 | 7.310160915 | 2.764875959  | 7.63E-06    | 0.000114982 |
| SCARNA21 | 10.27955699 | 11.47592191 | 1.196364922  | 4.08E-06    | 7.53E-05    |
| SCEL     | 2.4642441   | 4.605605841 | 2.141361741  | 0.002901139 | 0.009088973 |
| SCML4    | 6.128323622 | 7.508970219 | 1.380646596  | 0.013932678 | 0.030533275 |
| SCN1A    | 5.332921367 | 3.738454004 | -1.594467363 | 0.019372344 | 0.039844    |
| SCN7A    | 9.525459256 | 8.427129533 | -1.098329722 | 7.63E-06    | 0.000114982 |
| SCNN1B   | 11.18695882 | 10.0342605  | -1.152698322 | 1.36E-05    | 0.000170337 |
| SEC14L5  | 7.2447716   | 6.015021111 | -1.229750489 | 0.001260525 | 0.00468919  |
| SEPLG    | 8.251841244 | 9.528484974 | 1.27664373   | 0.002310776 | 0.007501587 |
| SERPINA3 | 6.767019178 | 9.401235752 | 2.634216574  | 6.14E-05    | 0.000493555 |
| SERPINA4 | 9.467566489 | 7.987554033 | -1.480012456 | 2.32E-05    | 0.000244525 |
| SERPINA5 | 13.33488321 | 12.27916607 | -1.055717141 | 0.00038469  | 0.001915198 |
| SERPINC1 | 7.571979044 | 6.482030956 | -1.089948089 | 0.009486163 | 0.022733565 |
| SFRP2    | 5.675220078 | 8.290264385 | 2.615044307  | 0.00038469  | 0.001915198 |
| SFRP4    | 7.368967578 | 8.589725819 | 1.220758241  | 0.012434026 | 0.027890332 |

|             |             |             |              |             |             |
|-------------|-------------|-------------|--------------|-------------|-------------|
| SFXN2       | 13.21882032 | 12.2075563  | -1.011264026 | 0.001260525 | 0.00468919  |
| SH2D1A      | 4.675019389 | 6.074237881 | 1.399218493  | 0.001075106 | 0.004146384 |
| SH3BP1      | 7.318097956 | 8.397573537 | 1.079475581  | 0.004630835 | 0.012878433 |
| SIGLEC1     | 9.707217356 | 10.9059833  | 1.198765941  | 0.001994725 | 0.006703936 |
| SIGLEC6     | 4.452847778 | 6.498620956 | 2.045773178  | 0.000653663 | 0.002845514 |
| SIGLEC8     | 3.191999267 | 4.781985841 | 1.589986574  | 0.021539551 | 0.043500221 |
| SIRPB2      | 5.695337478 | 6.748358204 | 1.053020726  | 0.002669612 | 0.008400777 |
| SIRPG       | 4.168089633 | 6.121340804 | 1.95325117   | 0.000178961 | 0.001075178 |
| SIRPG-AS1   | 2.289277489 | 4.719280237 | 2.430002748  | 0.00042241  | 0.002088054 |
| SIT1        | 5.093825878 | 6.917351452 | 1.823525574  | 0.000653663 | 0.002845514 |
| SLA2        | 6.556724878 | 8.250547707 | 1.69382283   | 2.93E-06    | 6.06E-05    |
| SLAMF1      | 5.715771011 | 7.246306178 | 1.530535167  | 0.003534166 | 0.01039411  |
| SLAMF6      | 5.853140767 | 7.273209741 | 1.420068974  | 0.006008756 | 0.015730247 |
| SLAMF7      | 6.884043056 | 8.68856163  | 1.804518574  | 0.004630835 | 0.012878433 |
| SLC10A2     | 10.53617113 | 9.51277837  | -1.023392763 | 0.000653663 | 0.002845514 |
| SLC10A5     | 8.212021567 | 6.657747941 | -1.554273626 | 2.93E-06    | 6.06E-05    |
| SLC12A3     | 15.77858188 | 13.86036391 | -1.91821797  | 0.00072495  | 0.003136112 |
| SLC13A3     | 16.42976624 | 15.3615739  | -1.068192344 | 0.000293761 | 0.001585238 |
| SLC13A5     | 5.321625078 | 3.860192911 | -1.461432167 | 0.023905264 | 0.047276086 |
| SLC16A10    | 10.67946551 | 9.619306511 | -1.060159    | 3.83E-05    | 0.000352659 |
| SLC17A7     | 4.509452111 | 5.607748781 | 1.09829667   | 0.000178961 | 0.001075178 |
| SLC19A2     | 10.46526112 | 9.422121004 | -1.043140119 | 2.12E-08    | 4.42E-06    |
| SLC22A8     | 15.71806553 | 14.47513022 | -1.242935311 | 0.000722085 | 0.003129751 |
| SLC23A1     | 12.5378003  | 11.42883285 | -1.108967452 | 0.000178961 | 0.001075178 |
| SLC23A3     | 12.7172258  | 11.59433114 | -1.122894663 | 0.00984202  | 0.023183842 |
| SLC24A4     | 6.039611733 | 7.231700156 | 1.192088422  | 0.000944832 | 0.003780979 |
| SLC25A25    | 11.97288688 | 10.89734222 | -1.075544659 | 2.12E-08    | 4.42E-06    |
| SLC25A48    | 9.2101895   | 8.171866048 | -1.038323452 | 0.006008756 | 0.015730247 |
| SLC26A4     | 10.03125953 | 8.438873615 | -1.592385919 | 0.000460787 | 0.00218016  |
| SLC26A7     | 11.89417942 | 10.50862419 | -1.38555523  | 2.06E-06    | 4.71E-05    |
| SLC28A2     | 8.119501244 | 6.652006578 | -1.467494667 | 0.011073759 | 0.025492733 |
| SLC2A12     | 10.22684334 | 9.177539    | -1.049304344 | 0.000218157 | 0.001239939 |
| SLC2A2      | 11.88455018 | 10.74952979 | -1.135020385 | 2.93E-06    | 6.06E-05    |
| SLC2A3      | 11.37897981 | 9.401911289 | -1.977068522 | 6.37E-07    | 2.28E-05    |
| SLC34A2     | 9.403054089 | 10.71837432 | 1.31532023   | 0.008728547 | 0.021002819 |
| SLC34A3     | 12.32346894 | 11.09632144 | -1.227147504 | 0.000653663 | 0.002845514 |
| SLC36A2     | 14.53120959 | 12.97491898 | -1.556290611 | 1.16E-05    | 0.000157516 |
| SLC38A5     | 5.808975344 | 6.840741581 | 1.031766237  | 0.004375143 | 0.012482254 |
| SLC4A1      | 13.30083612 | 11.94279073 | -1.358045389 | 0.000264745 | 0.001432524 |
| SLC4A9      | 12.96028123 | 11.72337228 | -1.236908956 | 0.000319768 | 0.001658505 |
| SLC5A12     | 15.43354048 | 14.30831938 | -1.125221096 | 3.65E-05    | 0.000352659 |
| SLC6A17     | 9.387454889 | 7.80218013  | -1.585274759 | 1.91E-05    | 0.000218314 |
| SLC8A1-AS1  | 8.071828211 | 6.738508381 | -1.33331983  | 2.93E-06    | 6.06E-05    |
| SLCO4A1-AS1 | 6.718129622 | 4.954504563 | -1.763625059 | 0.000653663 | 0.002845514 |

|             |             |             |              |             |             |
|-------------|-------------|-------------|--------------|-------------|-------------|
| SLCO5A1     | 4.682262422 | 5.813356763 | 1.131094341  | 0.004050528 | 0.011607841 |
| SLFN12L     | 5.742281378 | 6.823178856 | 1.080897478  | 0.005281184 | 0.014283284 |
| SLIT2-IT1   | 7.466591933 | 6.221943448 | -1.244648485 | 4.87E-05    | 0.000416496 |
| SLIT3       | 12.48604122 | 13.49459049 | 1.00854927   | 0.000118628 | 0.000798045 |
| SLPI        | 6.837094678 | 9.285206193 | 2.448111515  | 0.000218157 | 0.001239939 |
| SNCAIP      | 7.1766392   | 8.253111604 | 1.076472404  | 6.14E-05    | 0.000493555 |
| SNORA104    | 6.2537036   | 5.176568163 | -1.077135437 | 0.006820434 | 0.01737225  |
| SNORA53     | 9.481285711 | 8.339296007 | -1.141989704 | 1.36E-05    | 0.000170337 |
| SNORA63     | 7.374272622 | 5.990505296 | -1.383767326 | 8.50E-08    | 7.43E-06    |
| SNORD133    | 12.52875788 | 11.38746836 | -1.141289519 | 3.00E-05    | 0.000295866 |
| SNORD97     | 6.756281767 | 5.206445926 | -1.549835841 | 2.55E-07    | 1.37E-05    |
| SNTG1       | 6.812316211 | 5.070130904 | -1.742185307 | 0.000913862 | 0.003666212 |
| SNX20       | 6.878021944 | 8.659612396 | 1.781590452  | 0.000218157 | 0.001239939 |
| SOST        | 9.498118956 | 8.041541685 | -1.45657727  | 0.000460787 | 0.00218016  |
| SOWAHD      | 4.422606433 | 5.726511159 | 1.303904726  | 9.98E-05    | 0.000705623 |
| SP140       | 6.3641483   | 8.075370219 | 1.711221919  | 0.001473392 | 0.00531078  |
| SPDYE7P     | 6.243826    | 3.352225563 | -2.891600437 | 0.000460787 | 0.00218016  |
| SPHK1       | 6.654760378 | 7.798264885 | 1.143504507  | 0.001994725 | 0.006703936 |
| SPIB        | 5.303695933 | 7.636576074 | 2.332880141  | 0.001075106 | 0.004146384 |
| SPN         | 8.356079478 | 9.699929078 | 1.3438496    | 0.004050528 | 0.011607841 |
| SPOCD1      | 3.274367744 | 4.605358181 | 1.330990437  | 0.006820434 | 0.01737225  |
| SPON1       | 10.13042563 | 11.36853837 | 1.238112741  | 4.08E-06    | 7.53E-05    |
| SPON2       | 10.42312651 | 11.62797753 | 1.204851019  | 0.000913862 | 0.003666212 |
| SPSB4       | 7.187089356 | 6.072645033 | -1.114444322 | 0.008728547 | 0.021002819 |
| SRPX        | 6.215559467 | 7.469486615 | 1.253927148  | 6.32E-05    | 0.000506494 |
| SRRM4       | 7.650310867 | 4.435404763 | -3.214906104 | 0.001007575 | 0.004022027 |
| ST3GAL6-AS1 | 6.517211256 | 5.287348667 | -1.229862589 | 0.000394196 | 0.001952805 |
| ST6GALNAC3  | 9.868248944 | 8.5193311   | -1.348917844 | 1.42E-06    | 3.74E-05    |
| ST8SIA1     | 6.411605122 | 7.465811152 | 1.05420603   | 4.08E-06    | 7.53E-05    |
| STEAP4      | 8.707843678 | 10.03783907 | 1.329995393  | 0.000218157 | 0.001239939 |
| STMN2       | 0.860161011 | 2.904413581 | 2.04425257   | 0.001994725 | 0.006703936 |
| STPG3       | 8.855811078 | 7.587481878 | -1.2683292   | 0.000460787 | 0.00218016  |
| STPG3-AS1   | 9.022247144 | 7.722049393 | -1.300197752 | 4.87E-05    | 0.000416496 |
| STRA6       | 11.99095348 | 10.73616242 | -1.254791059 | 0.006008756 | 0.015730247 |
| SUSD2       | 14.03178949 | 12.89123104 | -1.140558448 | 0.001716851 | 0.005987476 |
| SVEP1       | 11.47670157 | 13.0377653  | 1.56106373   | 8.50E-08    | 7.43E-06    |
| SYCP2       | 8.811396367 | 7.106269274 | -1.705127093 | 2.93E-06    | 6.06E-05    |
| SYNC        | 5.870550789 | 7.004409163 | 1.133858374  | 1.42E-06    | 3.74E-05    |
| SYT10       | 7.204061867 | 5.688823548 | -1.515238319 | 6.37E-07    | 2.28E-05    |
| SYT12       | 4.740492489 | 6.48628633  | 1.745793841  | 0.001075106 | 0.004146384 |
| SYT16       | 4.6870525   | 6.623386393 | 1.936333893  | 0.000118628 | 0.000798045 |
| TBX18       | 4.0574405   | 5.562453022 | 1.505012522  | 0.001479958 | 0.005317687 |
| TBX21       | 5.558716422 | 6.646713915 | 1.087997493  | 0.004630835 | 0.012878433 |
| TCEAL2      | 7.770874    | 6.4183821   | -1.3524919   | 1.49E-07    | 9.92E-06    |

|           |             |             |              |             |             |
|-----------|-------------|-------------|--------------|-------------|-------------|
| TCF24     | 7.256186478 | 5.254371611 | -2.001814867 | 3.83E-05    | 0.000352659 |
| TDO2      | 2.910004656 | 4.896204974 | 1.986200319  | 0.001222421 | 0.004689072 |
| TESC      | 7.829527233 | 9.055889767 | 1.226362533  | 1.78E-05    | 0.000205405 |
| TESPA1    | 5.759293311 | 7.261585926 | 1.502292615  | 0.004630835 | 0.012878433 |
| TEX41     | 8.464444578 | 6.928510989 | -1.535933589 | 2.12E-08    | 4.42E-06    |
| TGFBI     | 10.73670329 | 11.99425495 | 1.257551659  | 1.78E-05    | 0.000205405 |
| THBS2     | 9.945361178 | 11.6063792  | 1.661018026  | 0.001075106 | 0.004146384 |
| THEMIS    | 6.100577478 | 7.576719659 | 1.476142181  | 0.007724375 | 0.019082698 |
| THPO      | 8.5689625   | 7.510009226 | -1.058953274 | 0.000653663 | 0.002845514 |
| TIFAB     | 2.7670423   | 5.543242367 | 2.776200067  | 3.00E-05    | 0.000295866 |
| TIGIT     | 5.616522922 | 7.293933707 | 1.677410785  | 4.08E-06    | 7.53E-05    |
| TIMP1     | 10.25324911 | 12.02020422 | 1.766955111  | 9.58E-05    | 0.000677876 |
| TINCR     | 6.850507456 | 5.341256507 | -1.509250948 | 0.000653663 | 0.002845514 |
| TLR10     | 4.5389565   | 6.089150667 | 1.550194167  | 0.006008756 | 0.015730247 |
| TLR6      | 7.081550733 | 8.141078959 | 1.059528226  | 0.007724375 | 0.019082698 |
| TLR8      | 5.646287344 | 6.698777656 | 1.052490311  | 0.012325729 | 0.027890332 |
| TM4SF5    | 8.881875044 | 7.772206341 | -1.109668704 | 0.000264745 | 0.001432524 |
| TMC3      | 3.6451604   | 5.0218132   | 1.3766528    | 0.000277681 | 0.001498971 |
| TMC8      | 8.780927967 | 10.31658132 | 1.535653352  | 0.005281184 | 0.014283284 |
| TMEM105   | 8.126979267 | 6.465738785 | -1.661240481 | 0.015581059 | 0.033436314 |
| TMEM119   | 8.367097211 | 9.780788511 | 1.4136913    | 6.37E-07    | 2.28E-05    |
| TMEM132D  | 2.909290867 | 5.102496656 | 2.193205789  | 0.005190571 | 0.014283284 |
| TMEM154   | 6.068492578 | 7.139264785 | 1.070772207  | 0.00984202  | 0.023183842 |
| TMEM178A  | 10.15849552 | 9.11540843  | -1.043087093 | 0.000460787 | 0.00218016  |
| TMEM179   | 4.982921    | 6.387577567 | 1.404656567  | 0.012434026 | 0.027890332 |
| TMEM200C  | 7.936211956 | 6.35208817  | -1.584123785 | 9.56E-07    | 2.89E-05    |
| TMEM207   | 8.752645956 | 7.308639341 | -1.444006615 | 0.001075106 | 0.004146384 |
| TMEM52    | 6.403111011 | 5.381611878 | -1.021499133 | 0.015581059 | 0.033436314 |
| TMEM52B   | 13.37225754 | 12.00966187 | -1.362595678 | 6.37E-07    | 2.28E-05    |
| TMEM54    | 8.607381667 | 9.696021941 | 1.088640274  | 3.83E-05    | 0.000352659 |
| TMEM59L   | 4.743265    | 6.039787733 | 1.296522733  | 0.000155936 | 0.000986447 |
| TMEM92    | 3.073648044 | 4.398075485 | 1.324427441  | 0.000218157 | 0.001239939 |
| TMIGD1    | 7.127654467 | 5.339495485 | -1.788158981 | 0.001260525 | 0.00468919  |
| TMOD4     | 5.922286744 | 7.207370011 | 1.285083267  | 2.55E-07    | 1.37E-05    |
| TMSB10    | 11.82930767 | 13.32501963 | 1.495711963  | 5.63E-06    | 9.22E-05    |
| TMSB4X    | 12.86593903 | 14.2752804  | 1.409341363  | 5.63E-06    | 9.22E-05    |
| TNC       | 11.62390368 | 13.37334731 | 1.74944363   | 0.000913862 | 0.003666212 |
| TNFAIP8   | 8.363552244 | 9.431996256 | 1.068444011  | 6.14E-05    | 0.000493555 |
| TNFAIP8L2 | 7.089151811 | 8.153001233 | 1.063849422  | 4.25E-08    | 5.08E-06    |
| TNFRSF11A | 6.508087922 | 7.53682643  | 1.028738507  | 0.002310776 | 0.007501587 |
| TNFRSF12A | 9.706299733 | 10.71330984 | 1.007010111  | 0.008728547 | 0.021002819 |
| TNFRSF18  | 3.108105133 | 4.739708067 | 1.631602933  | 0.010543297 | 0.024773807 |
| TNFRSF4   | 5.836832156 | 6.903679078 | 1.066846922  | 0.001075106 | 0.004146384 |
| TNFSF14   | 5.074959878 | 6.803833415 | 1.728873537  | 0.000460787 | 0.00218016  |

|          |             |             |              |             |             |
|----------|-------------|-------------|--------------|-------------|-------------|
| TNFSF8   | 6.744649989 | 7.82759533  | 1.082945341  | 0.000774288 | 0.003234177 |
| TNN      | 7.128812111 | 5.976048415 | -1.152763696 | 0.006008756 | 0.015730247 |
| TNNI2    | 3.116463178 | 4.699956619 | 1.583493441  | 0.008728547 | 0.021002819 |
| TNNT2    | 9.718845211 | 8.46768497  | -1.251160241 | 7.63E-06    | 0.000114982 |
| TNNT3    | 3.123006689 | 4.676020426 | 1.553013737  | 0.023500502 | 0.047263728 |
| TNS4     | 8.974869211 | 6.944712363 | -2.030156848 | 2.32E-05    | 0.000244525 |
| TPSAB1   | 6.040154589 | 7.858548356 | 1.818393767  | 0.00307561  | 0.009346062 |
| TPSB2    | 6.522970467 | 8.31526233  | 1.792291863  | 0.00307561  | 0.009346062 |
| TPSD1    | 3.648098078 | 5.389346419 | 1.741248341  | 0.011073759 | 0.025492733 |
| TRAF3IP3 | 8.013155156 | 9.187527522 | 1.174372367  | 0.00038469  | 0.001915198 |
| TRANK1   | 10.66359933 | 11.76830695 | 1.104707619  | 4.87E-05    | 0.000416496 |
| TRAT1    | 3.219401411 | 5.188165952 | 1.968764541  | 0.000319768 | 0.001658505 |
| TREM1    | 6.097865467 | 4.838020774 | -1.259844693 | 0.002310776 | 0.007501587 |
| TREML1   | 4.313813911 | 5.590523704 | 1.276709793  | 1.78E-05    | 0.000205405 |
| TREML2   | 3.263310811 | 4.952322596 | 1.689011785  | 0.019373277 | 0.039844    |
| TRG-AS1  | 5.342049378 | 6.698411919 | 1.356362541  | 0.000264745 | 0.001432524 |
| TRIM50   | 9.915259956 | 7.409679374 | -2.505580581 | 2.32E-05    | 0.000244525 |
| TRIM72   | 4.166422656 | 2.576598126 | -1.58982453  | 0.00034297  | 0.001771385 |
| TRPM6    | 11.63131719 | 9.278664363 | -2.352652826 | 7.63E-06    | 0.000114982 |
| TSHZ2    | 9.373987289 | 10.60434474 | 1.230357452  | 6.37E-07    | 2.28E-05    |
| TSKU     | 12.77372126 | 11.71482768 | -1.058893578 | 9.58E-05    | 0.000677876 |
| TTPA     | 7.580277056 | 6.49979667  | -1.080480385 | 0.001075106 | 0.004146384 |
| TTY14    | 7.862026289 | 5.716590933 | -2.145435356 | 0.023500502 | 0.047263728 |
| TUB-AS1  | 8.818046533 | 7.750360963 | -1.06768557  | 0.000774288 | 0.003234177 |
| TUBA1A   | 10.59708279 | 11.60541822 | 1.00833543   | 0.002669612 | 0.008400777 |
| TUBB3    | 5.077714156 | 7.6026304   | 2.524916244  | 0.000460787 | 0.00218016  |
| TYROBP   | 8.684539911 | 10.13261153 | 1.448071615  | 0.000178961 | 0.001075178 |
| UBASH3A  | 5.766039156 | 7.483506263 | 1.717467107  | 0.00214792  | 0.007184112 |
| UBE2C    | 4.377307133 | 5.395397652 | 1.018090519  | 0.023905264 | 0.047276086 |
| UCN3     | 6.610020367 | 5.322604004 | -1.287416363 | 0.002310776 | 0.007501587 |
| UGT2B7   | 15.22840263 | 13.9590668  | -1.269335833 | 2.32E-05    | 0.000244525 |
| USP9Y    | 10.57922896 | 7.890418426 | -2.68881053  | 0.00490465  | 0.013600338 |
| VASH1    | 10.17237339 | 11.19525017 | 1.022876778  | 1.42E-06    | 3.74E-05    |
| VAV1     | 8.209001944 | 9.516369822 | 1.307367878  | 0.006820434 | 0.01737225  |
| VCAN     | 10.59596008 | 12.85625869 | 2.260298607  | 0.001716851 | 0.005987476 |
| VEGFA    | 13.94708777 | 12.93337151 | -1.013716259 | 2.12E-08    | 4.42E-06    |
| VIM      | 12.83595322 | 13.97628229 | 1.14032907   | 0.000452501 | 0.00218016  |
| VSIG4    | 8.719096    | 9.913039359 | 1.193943359  | 0.000460787 | 0.00218016  |
| VWF      | 11.56043968 | 12.86720686 | 1.306767185  | 0.004050528 | 0.011607841 |
| WBSCR17  | 9.408238111 | 8.259864456 | -1.148373656 | 0.001075106 | 0.004146384 |
| WDR49    | 6.819176244 | 5.689257393 | -1.129918852 | 0.000178961 | 0.001075178 |
| WDR86    | 7.616181233 | 8.718689767 | 1.102508533  | 0.000264745 | 0.001432524 |
| WFDC2    | 10.1594503  | 11.97815504 | 1.818704737  | 7.69E-05    | 0.000583998 |
| WISP2    | 2.728136622 | 4.990320359 | 2.262183737  | 0.000118628 | 0.000798045 |

|            |             |             |              |             |             |
|------------|-------------|-------------|--------------|-------------|-------------|
| WNT10A     | 5.796883489 | 7.513100881 | 1.716217393  | 0.000218157 | 0.001239939 |
| WNT4       | 7.175698833 | 8.592329874 | 1.416631041  | 1.38E-05    | 0.000171666 |
| WNT7A      | 3.869583644 | 5.467637456 | 1.598053811  | 0.000549885 | 0.002497649 |
| WNT7B      | 4.019903811 | 5.697108785 | 1.677204974  | 0.004630835 | 0.012878433 |
| WT1        | 10.82579511 | 9.382107389 | -1.443687722 | 2.55E-07    | 1.37E-05    |
| WT1-AS     | 8.734844922 | 7.584458141 | -1.150386781 | 0.000146054 | 0.000925394 |
| XCL2       | 2.8601585   | 4.563024241 | 1.702865741  | 0.001473392 | 0.00531078  |
| XPNPPE2    | 15.34687584 | 14.12174424 | -1.225131607 | 0.000484177 | 0.002288694 |
| XYLT1      | 9.338278644 | 10.39699621 | 1.058717567  | 9.58E-05    | 0.000677876 |
| ZAP70      | 7.850523367 | 9.068470081 | 1.217946715  | 0.01589401  | 0.034016708 |
| ZBED2      | 4.574848411 | 5.753340652 | 1.178492241  | 0.011073759 | 0.025492733 |
| ZBP1       | 5.896378367 | 7.273612893 | 1.377234526  | 0.015581059 | 0.033436314 |
| ZBTB16     | 11.56782036 | 10.47648364 | -1.091336711 | 0.003534166 | 0.01039411  |
| ZCCHC16    | 6.545698889 | 5.193719481 | -1.351979407 | 0.001473392 | 0.00531078  |
| ZFP36      | 13.49359756 | 11.14399402 | -2.349603537 | 1.38E-05    | 0.000171666 |
| ZNF732     | 5.489978556 | 4.323442811 | -1.166535744 | 0.006140938 | 0.016044805 |
| ZNF804B    | 8.726937889 | 6.983283119 | -1.74365477  | 2.06E-06    | 4.71E-05    |
| ZNF831     | 6.684740178 | 8.290952719 | 1.606212541  | 0.002310776 | 0.007501587 |
| ZNF91      | 11.97772381 | 10.86384329 | -1.113880526 | 2.93E-06    | 6.06E-05    |
| ZNF98      | 6.378201389 | 5.241917841 | -1.136283548 | 0.00167538  | 0.005987476 |
| ZNF99      | 6.505564356 | 4.942016541 | -1.563547815 | 0.000913862 | 0.003666212 |
| ZRANB2-AS1 | 6.399191967 | 5.254095404 | -1.145096563 | 0.00038469  | 0.001915198 |
| ZYG11A     | 10.80209623 | 9.50995767  | -1.292138563 | 0.012434026 | 0.027890332 |

**Table S5. Differentially expressed miRNAs between DKD and normal samples in GSE51674. (log<sub>2</sub>|fold change|>1.5 & P-value<0.001)**

| id              | logFC        | AveExpr      | t            | P-Value     |
|-----------------|--------------|--------------|--------------|-------------|
| hsa-miR-1237    | -6.781898205 | -1.207251468 | -6.24599128  | 0.000239882 |
| hsa-miR-33b*    | -6.751953748 | -2.439218556 | -5.634626021 | 0.000478226 |
| hsa-miR-1225-3p | -5.546789639 | -0.46592318  | -5.871683751 | 0.000363906 |
| hsa-miR-1228    | -5.411731387 | -0.344029035 | -6.845644914 | 0.000127428 |
| hsa-miR-1234    | -5.277046716 | -0.093818091 | -5.912615736 | 0.000347395 |
| hsa-miR-1268    | -4.702316857 | -1.114630725 | -5.969878334 | 0.000325664 |
| hsa-miR-572     | -3.839112239 | 0.489962979  | -6.655043355 | 0.00015511  |
| hsa-miR-1275    | -3.592412526 | -1.483815665 | -5.602172737 | 0.000496736 |
| hsa-miR-1229    | -2.538195133 | -1.740898587 | -6.8811916   | 0.000122895 |
| hsa-miR-1539    | -2.538195133 | -1.740898587 | -6.8811916   | 0.000122895 |
| hsa-miR-2116*   | -2.538195133 | -1.740898587 | -6.8811916   | 0.000122895 |
| hsa-miR-296-5p  | -2.538195133 | -1.740898587 | -6.8811916   | 0.000122895 |
| hsa-miR-602     | -2.538195133 | -1.740898587 | -6.8811916   | 0.000122895 |
| hsa-miR-634     | -2.419985558 | -1.669972842 | -5.663225724 | 0.00046254  |
| hsa-miR-320a    | -2.363857029 | -1.133534527 | -10.4343553  | 5.87E-06    |
| hsa-miR-1274b   | -2.267372529 | -1.017264876 | -6.323089255 | 0.000220623 |
| hsa-miR-92b     | -2.223839888 | -1.406964028 | -6.377399648 | 0.000208081 |
| hsa-miR-1227    | -2.000604305 | -1.14333936  | -5.951157213 | 0.000332599 |
| hsa-miR-1307    | -2.000604305 | -1.14333936  | -5.951157213 | 0.000332599 |
| hsa-miR-339-3p  | -2.000604305 | -1.14333936  | -5.951157213 | 0.000332599 |
| hsa-miR-563     | -2.000604305 | -1.14333936  | -5.951157213 | 0.000332599 |
| hsa-miR-138     | -1.598611224 | -0.793822177 | -5.580244507 | 0.000509688 |
| hsa-miR-625*    | -1.598611224 | -0.793822177 | -5.580244507 | 0.000509688 |
| hsa-miR-16      | 1.502869505  | -0.124347866 | 5.969286514  | 0.000325881 |
| hsa-miR-195     | 1.559928167  | 0.075110497  | 8.733472672  | 2.21E-05    |
| hsa-let-7a      | 1.583118313  | 0.227206294  | 10.15091553  | 7.22E-06    |
| hsa-miR-28-5p   | 2.309008962  | -0.462391676 | 6.017370972  | 0.000308772 |
| hsa-miR-21      | 2.493016703  | 0.151631922  | 6.827144879  | 0.00012986  |
| hsa-miR-183     | 2.81815391   | -0.190992666 | 6.466827256  | 0.000189108 |
| hsa-miR-145*    | 2.824353444  | -0.097653308 | 6.258156313  | 0.000236724 |
| hsa-miR-590-5p  | 2.835070108  | -0.296052991 | 6.070968709  | 0.000290858 |
| hsa-miR-454     | 3.092428919  | 0.501608147  | 6.035385143  | 0.000302619 |
| hsa-miR-361-3p  | 3.262406075  | -0.374799768 | 5.834299338  | 0.000379742 |
| hsa-miR-429     | 3.354500593  | -0.671699435 | 5.70777136   | 0.000439222 |
| hsa-miR-181c    | 3.513761614  | 0.977997642  | 7.064259306  | 0.000102206 |
| hsa-miR-139-5p  | 3.700589339  | -0.771068688 | 5.836841165  | 0.000378642 |
| hsa-miR-31*     | 3.746812622  | 0.563481421  | 6.614546319  | 0.000161812 |
| hsa-miR-132     | 3.799595944  | -0.84413016  | 6.09183002   | 0.000284198 |
| hsa-miR-301a    | 3.810770015  | -0.102553968 | 5.892715101  | 0.000355317 |
| hsa-miR-199b-5p | 3.8715256    | 0.101844006  | 6.981419036  | 0.000111048 |
| hsa-miR-335     | 3.911184717  | -0.074868113 | 7.410929671  | 7.28E-05    |



|                 |             |              |             |             |
|-----------------|-------------|--------------|-------------|-------------|
| hsa-miR-155     | 3.961274761 | -0.076695036 | 7.455600233 | 6.97E-05    |
| hsa-miR-34a     | 4.347596972 | -1.319340394 | 5.593597095 | 0.000501758 |
| hsa-miR-95      | 4.488444076 | 1.948074145  | 8.813849907 | 2.07E-05    |
| hsa-miR-223     | 4.571223029 | 0.034276541  | 9.180795731 | 1.53E-05    |
| hsa-miR-374b    | 4.874439394 | -1.043100147 | 6.739119934 | 0.000142155 |
| hsa-miR-146a    | 4.894443099 | -1.302082998 | 6.549969862 | 0.000173169 |
| hsa-miR-374a    | 5.302143696 | -0.637735689 | 7.114471069 | 9.72E-05    |
| hsa-miR-142-5p  | 5.370490783 | 1.677522092  | 6.364304657 | 0.000211031 |
| hsa-miR-186     | 5.417009521 | 2.57956558   | 10.59483502 | 5.23E-06    |
| hsa-miR-146b-5p | 5.509728269 | -1.12671439  | 7.03508031  | 0.000105228 |
| hsa-miR-126*    | 6.024205142 | 3.396541578  | 19.18507507 | 5.20E-08    |
| hsa-miR-135b    | 7.618639091 | 4.260549597  | 26.95923824 | 3.49E-09    |

**Table S6. Co-expressed lncRNAs and mRNAs (R>0.6 and P-value<0.05; Pearson correlation)**

| <b>lncRNAs</b> | <b>mRNAs</b> | <b>Pearson correlation coefficient</b> | <b>P-value</b> |
|----------------|--------------|----------------------------------------|----------------|
| TEX41          | NR4A2        | 0.670047166                            | 7.82E-06       |
| TEX41          | CYP3A5       | 0.668967246                            | 8.19E-06       |
| DRAIC          | CYP3A5       | 0.61332991                             | 6.97E-05       |
| WT1-AS         | MME          | 0.861097503                            | 1.61E-11       |
| TEX41          | MME          | 0.816118254                            | 1.31E-09       |
| DRAIC          | MME          | 0.9119662                              | 1.03E-14       |
| WT1-AS         | CDH20        | 0.723485089                            | 6.18E-07       |
| TEX41          | CDH20        | 0.675483742                            | 6.19E-06       |
| DRAIC          | CDH20        | 0.858722676                            | 2.10E-11       |
| TEX41          | GADD45B      | 0.613091655                            | 7.03E-05       |
| MSC-AS1        | LY9          | 0.872906643                            | 3.90E-12       |
| WT1-AS         | SLC13A3      | 0.85520478                             | 3.11E-11       |
| TEX41          | SLC13A3      | 0.725452199                            | 5.57E-07       |
| DRAIC          | SLC13A3      | 0.86822149                             | 6.95E-12       |
| WT1-AS         | SLC26A7      | 0.660415176                            | 1.17E-05       |
| TEX41          | SLC26A7      | 0.852961758                            | 3.96E-11       |
| DRAIC          | SLC26A7      | 0.704316423                            | 1.64E-06       |
| MSC-AS1        | POU2AF1      | 0.841872959                            | 1.25E-10       |
| WT1-AS         | ATP6V0D2     | 0.808107823                            | 2.54E-09       |
| TEX41          | ATP6V0D2     | 0.842713391                            | 1.15E-10       |
| DRAIC          | ATP6V0D2     | 0.803941475                            | 3.53E-09       |
| TEX41          | GAD1         | 0.796571809                            | 6.22E-09       |
| DRAIC          | GAD1         | 0.668536906                            | 8.34E-06       |
| WT1-AS         | PRODH2       | 0.874561306                            | 3.16E-12       |
| TEX41          | PRODH2       | 0.699248056                            | 2.09E-06       |
| DRAIC          | PRODH2       | 0.901382604                            | 6.56E-14       |
| MSC-AS1        | C3           | 0.85864469                             | 2.12E-11       |
| WT1-AS         | KL           | 0.821605215                            | 8.20E-10       |
| TEX41          | KL           | 0.768738953                            | 4.36E-08       |
| DRAIC          | KL           | 0.882863544                            | 1.06E-12       |
| TEX41          | ZFP36        | 0.605797836                            | 9.03E-05       |
| WT1-AS         | TMEM178A     | 0.815560096                            | 1.38E-09       |
| TEX41          | TMEM178A     | 0.79296221                             | 8.14E-09       |
| DRAIC          | TMEM178A     | 0.72749963                             | 4.99E-07       |
| WT1-AS         | NTNG1        | 0.946056592                            | 3.27E-18       |
| TEX41          | NTNG1        | 0.690047982                            | 3.22E-06       |
| DRAIC          | NTNG1        | 0.775641608                            | 2.76E-08       |
| WT1-AS         | ADM          | 0.759309918                            | 7.94E-08       |
| TEX41          | ADM          | 0.606989039                            | 8.67E-05       |
| DRAIC          | ADM          | 0.623592107                            | 4.84E-05       |
| MSC-AS1        | INHBA        | 0.868279608                            | 6.90E-12       |
| LINC00639      | INHBA        | 0.603422478                            | 9.79E-05       |

|           |         |             |            |
|-----------|---------|-------------|------------|
| TEX41     | HSPA1B  | 0.683090533 | 4.42E-06   |
| MSC-AS1   | LAMA4   | 0.780078833 | 2.04E-08   |
| LINC00639 | LAMA4   | 0.693743762 | 2.71E-06   |
| WT1-AS    | FMN2    | 0.947865998 | 1.86E-18   |
| TEX41     | FMN2    | 0.80061117  | 4.57E-09   |
| DRAIC     | FMN2    | 0.794472348 | 7.28E-09   |
| MSC-AS1   | PXDN    | 0.844346991 | 9.72E-11   |
| LINC00639 | PXDN    | 0.716502647 | 8.90E-07   |
| MSC-AS1   | DLGAP1  | 0.873718584 | 3.52E-12   |
| MSC-AS1   | MGP     | 0.719853664 | 7.48E-07   |
| WT1-AS    | CLIC5   | 0.961948489 | 9.79E-21   |
| TEX41     | CLIC5   | 0.746495371 | 1.72E-07   |
| DRAIC     | CLIC5   | 0.821858619 | 8.02E-10   |
| MSC-AS1   | GRIN2A  | 0.802162405 | 4.06E-09   |
| WT1-AS    | SLC12A3 | 0.867535339 | 7.55E-12   |
| TEX41     | SLC12A3 | 0.729691953 | 4.44E-07   |
| DRAIC     | SLC12A3 | 0.820151018 | 9.30E-10   |
| MSC-AS1   | CCDC3   | 0.753253987 | 1.15E-07   |
| LINC00639 | CCDC3   | 0.768508236 | 4.42E-08   |
| MSC-AS1   | VCAN    | 0.925627439 | 6.55E-16   |
| LINC00639 | VCAN    | 0.702095573 | 1.82E-06   |
| TEX41     | FOSB    | 0.629040974 | 3.97E-05   |
| WT1-AS    | PCOLCE2 | 0.936105912 | 5.38E-17   |
| TEX41     | PCOLCE2 | 0.728544465 | 4.72E-07   |
| DRAIC     | PCOLCE2 | 0.845238836 | 8.88E-11   |
| MSC-AS1   | ABCA13  | 0.690301881 | 3.18E-06   |
| LINC00639 | ABCA13  | 0.82458403  | 6.31E-10   |
| WT1-AS    | ESM1    | 0.804630218 | 3.34E-09   |
| TEX41     | ESM1    | 0.681835021 | 4.67E-06   |
| DRAIC     | ESM1    | 0.754076884 | 1.09E-07   |
| WT1-AS    | IL1RL1  | 0.739026889 | 2.64E-07   |
| TEX41     | IL1RL1  | 0.733426796 | 3.61E-07   |
| DRAIC     | IL1RL1  | 0.600388085 | 0.00010837 |
| MSC-AS1   | TSHZ2   | 0.856599397 | 2.66E-11   |
| LINC00639 | TSHZ2   | 0.717035556 | 8.66E-07   |
| MSC-AS1   | ITGB6   | 0.841206216 | 1.33E-10   |
| LINC00639 | ITGB6   | 0.708681198 | 1.32E-06   |
| MSC-AS1   | VIM     | 0.886639454 | 6.23E-13   |
| LINC00639 | VIM     | 0.67285254  | 6.93E-06   |
| MSC-AS1   | SLIT3   | 0.811081434 | 1.99E-09   |
| LINC00639 | SLIT3   | 0.632913934 | 3.44E-05   |
| MSC-AS1   | MS4A1   | 0.777260725 | 2.47E-08   |
| WT1-AS    | PTPRO   | 0.936770429 | 4.53E-17   |
| TEX41     | PTPRO   | 0.774543071 | 2.97E-08   |

|           |         |              |          |
|-----------|---------|--------------|----------|
| DRAIC     | PTPRO   | 0.7940815    | 7.49E-09 |
| WT1-AS    | F3      | 0.813176039  | 1.68E-09 |
| TEX41     | F3      | 0.7731111608 | 3.27E-08 |
| DRAIC     | F3      | 0.765949211  | 5.22E-08 |
| MSC-AS1   | ADAM12  | 0.825290669  | 5.93E-10 |
| LINC00639 | ADAM12  | 0.779640629  | 2.10E-08 |
| WT1-AS    | NPHS1   | 0.905415826  | 3.33E-14 |
| TEX41     | NPHS1   | 0.671652947  | 7.30E-06 |
| DRAIC     | NPHS1   | 0.746844304  | 1.68E-07 |
| TEX41     | EGF     | 0.772640889  | 3.37E-08 |
| DRAIC     | EGF     | 0.759406098  | 7.89E-08 |
| WT1-AS    | PCDH15  | 0.754219223  | 1.09E-07 |
| TEX41     | PCDH15  | 0.736291012  | 3.08E-07 |
| DRAIC     | PCDH15  | 0.869894237  | 5.67E-12 |
| MSC-AS1   | TIMP1   | 0.875853208  | 2.68E-12 |
| LINC00639 | TIMP1   | 0.712814786  | 1.07E-06 |
| TEX41     | PDK4    | 0.642163489  | 2.42E-05 |
| MSC-AS1   | ABCC9   | 0.820537536  | 9.00E-10 |
| LINC00639 | ABCC9   | 0.679821364  | 5.11E-06 |
| MSC-AS1   | SLCO5A1 | 0.757396113  | 8.94E-08 |
| TEX41     | ERRFI1  | 0.68075398   | 4.91E-06 |
| TEX41     | ATF3    | 0.619886666  | 5.53E-05 |
| WT1-AS    | WT1     | 0.975409224  | 6.49E-24 |
| TEX41     | WT1     | 0.759332279  | 7.93E-08 |
| DRAIC     | WT1     | 0.798910423  | 5.21E-09 |
| MSC-AS1   | TNC     | 0.834524529  | 2.54E-10 |
| LINC00639 | TNC     | 0.786337104  | 1.32E-08 |
| WT1-AS    | CYP4Z1  | 0.668170166  | 8.47E-06 |
| TEX41     | CYP4Z1  | 0.699238952  | 2.09E-06 |
| DRAIC     | CYP4Z1  | 0.661935948  | 1.10E-05 |
| MSC-AS1   | MICAL2  | 0.861778642  | 1.49E-11 |
| LINC00639 | MICAL2  | 0.659343701  | 1.22E-05 |
| MSC-AS1   | COL14A1 | 0.820823142  | 8.78E-10 |
| LINC00639 | COL14A1 | 0.699374048  | 2.08E-06 |
| MSC-AS1   | BCL11A  | 0.823135104  | 7.17E-10 |
| MSC-AS1   | CP      | 0.884291772  | 8.67E-13 |
| WT1-AS    | PAH     | 0.852511174  | 4.16E-11 |
| TEX41     | PAH     | 0.756200803  | 9.62E-08 |
| DRAIC     | PAH     | 0.900885444  | 7.11E-14 |
